# Supplementary material for: Lipopolysaccharide stimulates dynamic changes in B cell metabolism to promote proliferation
Source: eLife journal article supplement (doi:10.7554/elife.109093), 2025-10-17
Supplement: fig9-figsupp1-data1 [file Labelled blot - ERK (top) and p-ERK (bottom).pdf › Figure 9 - figure supplement 1 - source data 1/Labelled blot - ERK (top) and p-ERK (bottom).pdf]

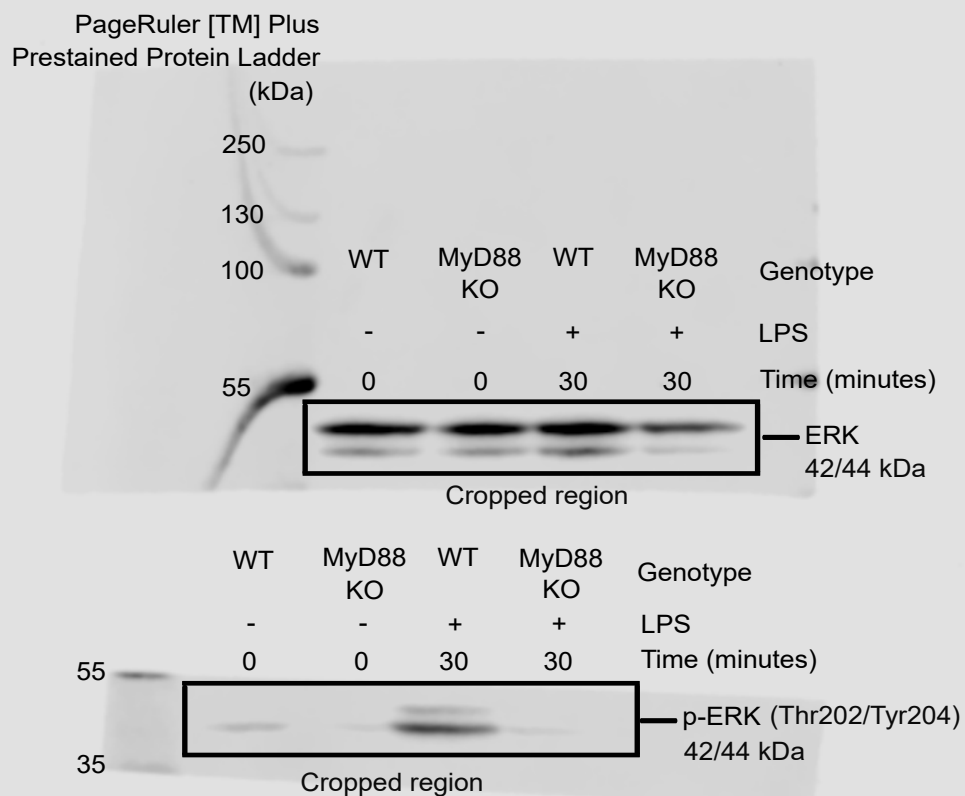

### Figure 9 - figure supplement 1 - source data 1

Uncropped and labelled membrane corresponding to Figure 9 - figure supplement 1, ERK (top) and p-ERK (Thr202/Tyr204)(bottom).
