# Supplementary material for: Lipopolysaccharide stimulates dynamic changes in B cell metabolism to promote proliferation
Source: eLife journal article supplement (doi:10.7554/elife.109093), 2025-10-17
Supplement: fig9-figsupp1-data1 [file Labelled blot - p38 (top) and p-p38 (bottom).pdf › Figure 9 - figure supplement 1 - source data 1/Labelled blot - p38 (top) and p-p38 (bottom).pdf]

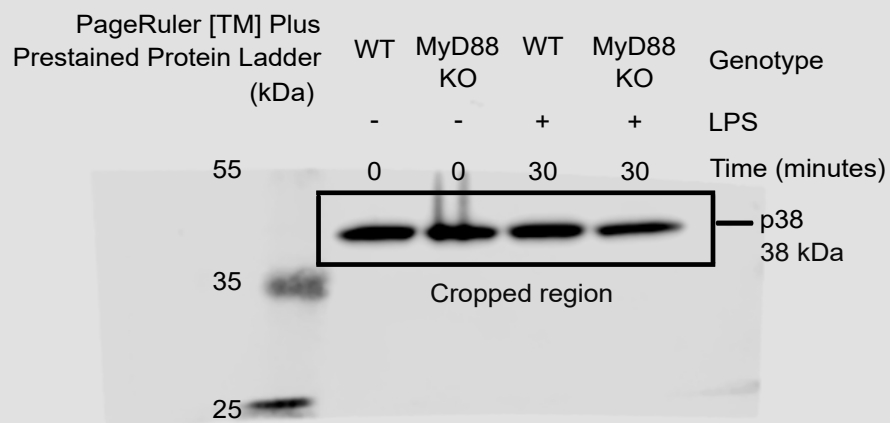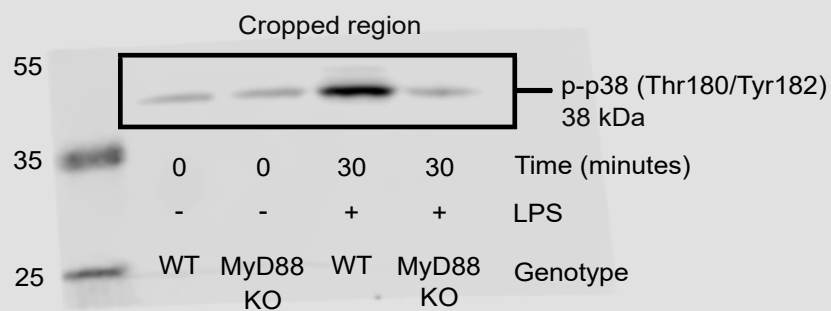

**Figure 9 - figure supplement 1 - source data 1**  
 Uncropped and labelled membrane corresponding to Figure 9 - figure supplement 1, p38 (top) and p-p38 (Thr180/Tyr182) (bottom).
