# Supplementary material for: Lipopolysaccharide stimulates dynamic changes in B cell metabolism to promote proliferation
Source: eLife. 2026 May 21;14:RP109093. doi: 10.7554/eLife.109093 (PMC13193715; doi:10.7554/eLife.109093)
Supplement: Supplementary file 1. — Related to Figure 1H, Figure 6—figure supplement 1. [file elife-109093-supp1.xlsx]

## Sheet: Description
Supplementary File 1. Enrichment analysis related to Figure 1H and Figure 6 - figure supplement 1
This table presents the enrichment terms from Gene Ontology (GO) Biological Processes and Kyoto Encyclopaedia of Genes and Genomes (KEGG) databases
Sheet 1	Enrirchment analysis of proteins upregulated in response to stimulation with LPS + IL-4 (Figure 1H)
Sheet 2	Enrichment analysis of proteins upregulated by Fluvastatin in LPS + IL-4 treated B cells cultured in normal media (Figure 6 - figure supplement 1)
Sheet 3	Enrichment analysis of proteins upregulated in LPS + IL-4 treated B cells cultured in cholesterol-free media with Fluvastatin compared to LPS + IL-4 treated B cells cultured in normal media (Figure 6 - figure supplement 1)

## Sheet: 1 Naive vs LPS + IL-4
	Database	Group	Pathway term	Fold Enrichment	Upregulated protein number	Population protein number	p Value	FDR	-log10 p	-log10FDR	Genes
1	GOTERM_BP_DIRECT	Protein synthesis	GO:0002181~cytoplasmic translation	3.90614	49	85	2.87489e-19	1.06917e-15	-18.5414	-14.971	RPL4, RPL32, RPL31, RPL34, RPL10A, RPL9, RPL6, RPL7, RPS4X, RPL7A, RPS14, RPS16, RPL18A, RPS19, RPS18, RPL36, RPL35, RPS10, RPS13, RPS9, RPS8, RPS6, RPL13A, RPSA, FTSJ1, RPL27, RPL26, RPL28, RPL12, RPL11, RPL36A, RPS15A, RPS3, RPL13, RPS2, RPL15, RPL18, RPS27A, RPL17, ZC3H15, RPL19, RPL23A, RPS26, RPS25, RPS28, RPL27A, RPL22L1, RPS20, FAU
2	GOTERM_BP_DIRECT	Ribosome	GO:0006364~rRNA processing	2.865	63	149	8.74833e-16	1.25757e-12	-15.0581	-11.9005	DDX49, PPAN, NAT10, PWP1, WDR43, RPL7, RPS16, RPS19, RRP12, UTP14A, RRP15, UTP14B, UTP15, NSUN4, IMP3, RPS6, DDX56, WDR74, DDX10, DDX54, WDR75, DDX51, TFB2M, FTSJ3, NSA2, MRTO4, GEMIN4, RPL27, RPL26, UTP25, DDX27, NOP2, RPL11, TSR3, DDX21, NOL8, RPS27L, RPF2, AK6, MRM3, NOL6, RRP7A, PDCD11, ERI1, PES1, UTP20, LYAR, NOP14, UTP4, RRP1B, PA2G4, WDR12, BYSL, ISG20, BOP1, RPS25, TBL3, RPS28, RPS27, MP…
3	GOTERM_BP_DIRECT	Ribosome	GO:0042254~ribosome biogenesis	3.23257	52	109	1.01444e-15	1.25757e-12	-14.9938	-11.9005	LTV1, PWP1, WDR43, IPO4, RPL7A, C1QBP, RIOK2, RIOK1, UTP14A, UTP14B, UTP15, NSUN4, IMP3, DDX56, WDR75, DDX51, FTSJ3, NSA2, GRWD1, MRTO4, DDX28, DDX27, RRN3, NIP7, NOP2, TSR3, GTPBP10, NOC4L, MALSU1, SDAD1, RPF2, RRP7A, DHX30, PES1, ZNHIT6, RRS1, HEATR3, NOP14, UTP4, MTERF3, RIOK3, WDR12, BYSL, BOP1, RPS28, MYBBP1A, MPHOSPH10, TSR1, NOL11, RBIS, RSL24D1, NOP53
4	GOTERM_BP_DIRECT	Protein synthesis	GO:0140242~translation at postsynapse	4.28683	31	49	8.87882e-14	8.25508e-11	-13.0516	-10.0833	RPL4, RPL32, RPL12, RPL34, RPL36A, RPS27L, RPL10A, RPL9, RPL6, RPL7, RPS14, RPL7A, RPS15A, RPS16, RPL36, RPL13, RPL35, RPL15, RPS27A, RPS10, RPL17, RPL13A, RPL23A, EEF2, RPS26, RPS28, RPS27, RPL27A, RPL27, RPL26, RPL28
5	GOTERM_BP_DIRECT	Protein synthesis	GO:0140236~translation at presynapse	4.23497	30	48	3.77635e-13	2.80885e-10	-12.4229	-9.55147	RPL4, RPL32, RPL12, RPL34, RPL36A, RPS27L, RPL10A, RPL9, RPL6, RPL7, RPS14, RPL7A, RPS15A, RPS16, RPL36, RPL13, RPL35, RPL15, RPS27A, RPS10, RPL17, RPL13A, RPL23A, RPS26, RPS28, RPS27, RPL27A, RPL27, RPL26, RPL28
6	GOTERM_BP_DIRECT	Ribosome	GO:0042274~ribosomal small subunit biogenesis	3.24875	35	73	7.41502e-11	4.59608e-08	-10.1299	-7.33761	LTV1, WDR3, HEATR1, NAT10, RPS27L, PWP2, WDR43, NOL6, RPS4X, RRP7A, RPS14, RPS15A, RPS16, NOB1, RPS19, BMS1, UTP20, RIOK2, RIOK1, RPS27A, RPS13, UTP15, NOP14, RPS9, UTP4, PNO1, RPS8, IMP3, RPS6, WDR75, RPS25, TBL3, RPS28, RPS27, MPHOSPH10
7	GOTERM_BP_DIRECT	Protein synthesis	GO:0006412~translation	2.03547	76	253	5.24274e-10	2.78539e-07	-9.28044	-6.55511	RPL4, EIF4A1, GFM1, RPL32, RPL31, RPL34, MRPS10, RPL10A, RPL9, MRPL35, RPL6, RPL7, RPS4X, RPS14, EIF4ENIF1, MRPL3, RPS16, RPL18A, NARS1, RPS19, RPS18, RPL36, RACK1, RPL35, RPS13, RPS9, RPS8, RPS6, RPL13A, RPSA, MRPS6, MRPL43, EEF1A1, EEF1G, LARS1, ETF1, RPL27, CARS1, RPL28, AARS1, RPL12, RPL11, RPL36A, MRPL17, RPS27L, MRPL57, GSPT2, RPS15A, RPS3, RPL13, RPS2, RPL15, IARS1, RPL18, RPS27A, RPL17, R…
8	GOTERM_BP_DIRECT	DNA replication	GO:0006270~DNA replication initiation	5.23597	17	22	1.40158e-09	6.51557e-07	-8.85338	-6.18605	PRIM2, MCM7, PRIM1, MCM10, NOC3L, CDC6, POLA1, CDC45, ORC6, ORC1, CCNE1, MCM3, MCM4, MCM5, MCM6, TOPBP1, MCM2
9	GOTERM_BP_DIRECT	DNA replication	GO:0006260~DNA replication	2.48913	36	98	1.80402e-07	7.45461e-05	-6.74376	-4.12757	PRIM2, BLM, PCNA, MCM7, PRIM1, DSCC1, MCM10, CHTF18, CHAF1B, CDC45, ORC6, CHTF8, CHAF1A, ORC1, PCLAF, POLE, GINS1, UPF1, RMI2, RRM1, LIG1, GINS3, GINS4, TWNK, DONSON, CDC6, POLA1, FAM111A, POLE2, GRWD1, MCM3, MCM4, MCM5, MCM6, DTL, MCM2
10	GOTERM_BP_DIRECT	Other	GO:0051607~defense response to virus	2.15827	43	135	8.76921e-07	0.000326127	-6.05704	-3.48661	IFITM3, CD86, RTP4, SLFN8, CD40, IFITM2, TRAF3IP1, NLRC5, DDX21, OAS1A, ADAR, IFIT1, IFIH1, TAGAP, DHX58, G3BP1, OASL1, OASL2, ZBP1, IFNAR2, GBP7, MLKL, DTX3L, IL10RB, RIOK3, DDX56, EIF2AK2, ISG15, PARP9, GM12250, ISG20, BST2, MOV10, PLSCR1, OAS2, OAS3, IRF1, POLR3D, POLR3E, IRF7, POLR3G, POLR3H, BCL2L1
11	GOTERM_BP_DIRECT	Ribosome	GO:0030490~maturation of SSU-rRNA	4.78303	12	17	3.58937e-06	0.00121353	-5.44498	-2.91595	RPS14, NOP14, RPS28, NOB1, RPS19, UTP4, RIOK3, WDR3, TSR3, RIOK2, NOL11, RIOK1
12	GOTERM_BP_DIRECT	DNA replication	GO:0006268~DNA unwinding involved in DNA replication	4.40437	13	20	3.98015e-06	0.00123352	-5.4001	-2.90886	GINS1, BLM, MCM7, GINS3, TWNK, GINS4, CDC45, RAD51, MCM3, MCM4, MCM5, MCM6, MCM2
13	GOTERM_BP_DIRECT	Other	GO:0045071~negative regulation of viral genome replication	3.76442	15	27	6.45014e-06	0.001653	-5.19043	-2.78173	IFITM3, IFITM2, EIF2AK2, OAS1A, ISG15, SRPK1, IFIH1, ISG20, BST2, FAM111A, PLSCR1, OAS2, OAS3, OASL1, OASL2
14	GOTERM_BP_DIRECT	Ribosome	GO:0000028~ribosomal small subunit assembly	4.96903	11	15	6.911e-06	0.001653	-5.16046	-2.78173	RRP7A, RPS25, RPS14, RPS28, RPS27, RPS19, RPS6, RPS27L, RPSA, FAU, PWP2
15	GOTERM_BP_DIRECT	Ribosome	GO:0000463~maturation of LSU-rRNA from tricistronic rRNA transcript (SSU-rRNA, 5.8S rRNA, LSU-rRNA)	4.96903	11	15	6.911e-06	0.001653	-5.16046	-2.78173	BOP1, DDX18, NIFK, ZNHIT3, ZNHIT6, PES1, RPL35, WDR12, RPF2, RPL7, FTSJ3
16	GOTERM_BP_DIRECT	Cell cycle	GO:1905820~positive regulation of chromosome separation	6.09836	9	10	7.44238e-06	0.001653	-5.12829	-2.78173	PLSCR1, NCAPH2, NCAPG2, NCAPG, NCAPD2, NCAPD3, SMC4, NCAPH, SMC2
17	GOTERM_BP_DIRECT	Cell cycle	GO:0007049~cell cycle	1.53359	98	433	7.6651e-06	0.001653	-5.11548	-2.78173	ERCC6L, CCNH, ZWILCH, DSCC1, GMNN, BUB1B, AHR, SMC4, PDCD2L, SMC2, MTBP, CCND3, CCND2, PTTG1, CHEK1, PIM1, KNTC1, FBXO5, TSPYL2, TIPIN, LIG1, SIAH1A, ESCO2, CDC34, CCNE1, FANCD2, PSME3, SPECC1L, TIMELESS, SIK1, KIF20B, CDCA2, CDCA5, CDCA8, PDS5B, GSPT2, PMF1, NCAPH, NPAT, DSN1, MAP3K20, CLSPN, SAC3D1, CDC6, ZWINT, NDC80, TPX2, CDK4, UBE2S, MDM2, CDK1, MNAT1, USP37, MCM7, NCAPG2, CETN3, BRCA1, KIF…
18	GOTERM_BP_DIRECT	Ribosome	GO:0000027~ribosomal large subunit assembly	4.5173	12	18	8.00054e-06	0.001653	-5.09688	-2.78173	BOP1, RPL11, NOP2, MRTO4, RRS1, PPAN, RPL23A, RPF2, NOP53, NLE1, MDN1, RPL6
19	GOTERM_BP_DIRECT	Cell cycle	GO:1905821~positive regulation of chromosome condensation	6.77596	8	8	1.0394e-05	0.00203449	-4.98322	-2.69155	NCAPH2, NCAPG2, NCAPG, NCAPD2, NCAPD3, SMC4, NCAPH, SMC2
20	GOTERM_BP_DIRECT	Other	GO:0009615~response to virus	2.71038	22	55	1.60303e-05	0.00298084	-4.79506	-2.52566	IFITM3, IFITM2, EIF2AK2, DDX21, OAS1A, ADAR, ISG15, IFIT1, IFIH1, ISG20, BST2, EEF1G, RPS15A, OAS2, NPC2, OAS3, BCL3, DHX58, STMN1, OASL1, BCL2L1, OASL2
21	GOTERM_BP_DIRECT	Ribosome	GO:0042273~ribosomal large subunit biogenesis	3.27869	15	31	4.77865e-05	0.00813483	-4.3207	-2.08965	NIP7, RPL11, WDR74, MALSU1, RPF2, NOC2L, SDAD1, NLE1, RPL7, BOP1, MRTO4, RRS1, HEATR3, RPL26, RSL24D1
22	GOTERM_BP_DIRECT	Ribosome	GO:0000462~maturation of SSU-rRNA from tricistronic rRNA transcript (SSU-rRNA, 5.8S rRNA, LSU-rRNA)	3.67031	13	24	4.81221e-05	0.00813483	-4.31766	-2.08965	UTP25, UTP4, RPS8, HEATR1, PWP2, WDR43, BYSL, RSL1D1, RPS16, RPS19, BMS1, TSR1, SLX9
23	GOTERM_BP_DIRECT	Sterol biosynthesis	GO:0016126~sterol biosynthetic process	3.87198	12	21	5.78123e-05	0.00924545	-4.23798	-2.03407	FDPS, IDI1, SQLE, NSDHL, HMGCS1, PMVK, SC5D, DHCR24, MSMO1, MVD, HMGCR, FDFT1
24	GOTERM_BP_DIRECT	Cell cycle	GO:0007131~reciprocal meiotic recombination	5.08197	9	12	6.20123e-05	0.00924545	-4.20752	-2.03407	PSMC3IP, ERCC6L, RAD51, RAD54L, TOPBP1, TRIP13, ERCC6, MLH1, CHTF18
25	GOTERM_BP_DIRECT	Other	GO:0035455~response to interferon-alpha	6.77596	7	7	6.21501e-05	0.00924545	-4.20656	-2.03407	IFNAR2, IFITM3, BST2, PLSCR1, IFITM2, EIF2AK2, ADAR
26	GOTERM_BP_DIRECT	DNA replication	GO:0000727~double-strand break repair via break-induced replication	5.42077	8	10	0.000118583	0.0163338	-3.92598	-1.78691	CDC45, MCM7, GINS4, MCM3, MCM4, MCM5, MCM6, MCM2
27	GOTERM_BP_DIRECT	Cell cycle	GO:0030261~chromosome condensation	5.42077	8	10	0.000118583	0.0163338	-3.92598	-1.78691	NCAPH2, NCAPG2, CDK1, NCAPD2, NCAPD3, SMC4, NCAPH, SMC2
28	GOTERM_BP_DIRECT	Cell cycle	GO:0007076~mitotic chromosome condensation	4.69105	9	13	0.000140385	0.0186461	-3.85268	-1.72941	ATF6B, CDCA5, NCAPH2, NCAPG, NCAPD2, NCAPD3, SMC4, NCAPH, SMC2
29	GOTERM_BP_DIRECT	Other	GO:0002376~immune system process	1.53796	69	304	0.000187843	0.0240892	-3.72621	-1.61818	IFITM3, CD86, H2-T23, CD40, IFITM2, TNFRSF13B, H2-K1, ADAR, AHR, IFIT1, IFIH1, C1QBP, CASP4, DHX58, OASL1, OASL2, HERC6, ZBP1, GBP7, DTX3L, CTPS1, MIF, PARP9, MPEG1, TRAF4, TRAF3, OAS2, TRAF6, OAS3, IRF1, IRF7, ORAI1, SQSTM1, H2-D1, ILRUN, ANKRD17, SLFN8, IGHV1-61, SLFN2, SLFN1, NLRC5, DDX21, CFP, PLD3, RNF135, RNF213, G3BP1, G3BP2, SLAMF7, TNFRSF14, SLAMF6, SLC15A3, LYAR, YTHDF1, YTHDF2, RIOK3, …
30	GOTERM_BP_DIRECT	Other	GO:0034063~stress granule assembly	3.38798	12	24	0.000267182	0.0331217	-3.57319	-1.47989	EIF4A1, YTHDF1, ATXN2, YTHDF2, OGFOD1, CSDE1, G3BP1, G3BP2, PRRC2C, UBAP2L, EIF2S1, PUM2
31	GOTERM_BP_DIRECT	Cell cycle	GO:0051984~positive regulation of chromosome segregation	4.35597	9	14	0.000285294	0.034226	-3.54471	-1.46564	NCAPH2, NCAPG2, NCAPG, NCAPD2, NCAPD3, CDC6, SMC4, NCAPH, SMC2
32	GOTERM_BP_DIRECT	Cell cycle	GO:0010032~meiotic chromosome condensation	6.77596	6	6	0.000364115	0.0410347	-3.43876	-1.38685	NCAPH2, NCAPD2, NCAPD3, SMC4, NCAPH, SMC2
33	GOTERM_BP_DIRECT	DNA replication	GO:0006279~premeiotic DNA replication	6.77596	6	6	0.000364115	0.0410347	-3.43876	-1.38685	MCM7, MCM3, MCM4, MCM5, MCM6, MCM2
34	GOTERM_BP_DIRECT	Sterol biosynthesis	GO:0006695~cholesterol biosynthetic process	3.25246	12	25	0.000414096	0.0452948	-3.3829	-1.34395	FDPS, IDI1, NSDHL, HMGCS1, PMVK, DHCR24, MSMO1, MVD, HMGCR, HSD17B7, LSS, FDFT1
									#NUM!
36	KEGG_PATHWAY	Other	mmu05171:Coronavirus disease - COVID-19	3.04525	64	146	4.49925e-18	1.36327e-15	-17.3469	-14.8654	RPL4, RPL32, RPL31, RPL34, F13A1, ADAR, RPL10A, RPL9, RPL6, RPL7, RPS4X, IFIH1, RPL7A, RPS14, RPS16, RPL18A, RPS19, RPS18, RPL36, RPL35, RPS10, IKBKE, RPS13, IFNAR2, RPS9, RPS8, RPS6, RPL13A, RPSA, TRAF3, OAS2, TRAF6, OAS3, RPL27, RPL26, RPL28, RPL12, RPL11, RPL36A, OAS1A, RPS27L, MAPK8, RPS15A, RPS3, RPL13, RPS2, RPL15, RPL18, RPS27A, RPL17, RPL19, JUN, EIF2AK2, ISG15, RPL23A, RPS26, RPS25, RPS2…
37	KEGG_PATHWAY	Ribosome	mmu03010:Ribosome	3.13184	55	122	4.46107e-16	6.75852e-14	-15.3506	-13.1701	RPL4, RPL32, RPL31, RPL34, MRPS10, RPL10A, RPL9, MRPL35, RPL6, RPL7, RPS4X, RPL7A, RPS14, MRPL3, RPS16, RPL18A, RPS19, RPS18, RPL36, RPL35, RPS10, RPS13, RPS9, RPS8, RPS6, RPL13A, RPSA, MRPS6, RPL27, RPL26, RPL28, RPL12, RPL11, RPL36A, MRPL17, RPS27L, RPS15A, RPS3, RPL13, RPS2, RPL15, RPL18, RPS27A, RPL17, RPL19, RPL23A, RPS26, RPS25, RPS28, RPS27, RPL27A, RPL22L1, RPS20, FAU, RSL24D1
38	KEGG_PATHWAY	Cell cycle	mmu04110:Cell cycle	2.17829	37	118	3.89086e-06	0.000392976	-5.40995	-3.40563	PCNA, MCM7, CCNH, CDCA5, BUB1B, PDS5B, AURKB, MTBP, CCND3, CDC45, ORC6, CCND2, ORC1, PTTG1, MYC, CHEK1, E2F3, FBXO5, E2F4, CDC6, ESCO2, NDC80, CCNA2, MAD2L2, WEE1, RBL1, TFDP1, CDK4, CCNE1, MDM2, CDK1, MCM3, MCM4, MCM5, MCM6, TRIP13, MCM2
39	KEGG_PATHWAY	Ribosome	mmu03008:Ribosome biogenesis in eukaryotes	2.51702	25	69	1.47776e-05	0.00111941	-4.8304	-2.95101	WDR3, HEATR1, NAT10, NMD3, AK6, PWP2, WDR43, NOL6, RRP7A, NOB1, BMS1, RIOK2, RIOK1, UTP14A, UTP14B, MDN1, UTP15, REXO1, UTP4, IMP3, WDR75, GNL3, TBL3, LSG1, MPHOSPH10
40	KEGG_PATHWAY	Other	mmu05330:Allograft rejection	4.16819	9	15	0.000437519	0.0220947	-3.359	-1.65571	CD86, IL4, H2-T23, CD40, H2-K1, FAS, H2-AA, H2-D1, H2-AB1
41	KEGG_PATHWAY	Other	mmu05320:Autoimmune thyroid disease	4.16819	9	15	0.000437519	0.0220947	-3.359	-1.65571	CD86, IL4, H2-T23, CD40, H2-K1, FAS, H2-AA, H2-D1, H2-AB1
42	KEGG_PATHWAY	DNA replication	mmu03030:DNA replication	2.77879	14	35	0.000681207	0.0294865	-3.16672	-1.53038	PRIM2, PCNA, MCM7, LIG1, PRIM1, POLE4, POLA1, POLE2, MCM3, MCM4, MCM5, MCM6, POLE, MCM2
43	KEGG_PATHWAY	Other	mmu04115:p53 signaling pathway	2.60512	15	40	0.000852657	0.0312777	-3.06923	-1.50477	RRM2, CD82, SIVA1, SIAH1A, COP1, CCND3, CCND2, CDK4, CCNE1, CHEK1, CDK1, MDM2, FAS, GTSE1, BCL2L1
44	KEGG_PATHWAY	Adhesion	mmu04514:Cell adhesion molecules	2.7016	14	36	0.00092904	0.0312777	-3.03197	-1.50477	CD86, ITGB1, H2-T23, CD40, SELPLG, SDC4, SDC3, H2-K1, H2-AA, ICAM1, ITGA6, ITGAV, H2-D1, H2-AB1
45	KEGG_PATHWAY	Other	mmu04060:Cytokine-cytokine receptor interaction	2.73669	13	33	0.00135725	0.0411245	-2.86734	-1.3859	IFNAR2, CD40, TNFRSF13B, IL10RB, EBI3, TNFRSF1B, IL2RG, TGFBR1, IL4, IL2RA, FAS, TNFRSF14, IL12RB1
46	KEGG_PATHWAY	Sterol biosynthesis	mmu00100:Steroid biosynthesis	3.9697	8	14	0.00166775	0.045939	-2.77787	-1.33782	SQLE, NSDHL, SC5D, DHCR24, MSMO1, HSD17B7, LSS, FDFT1

## Sheet: 2 Fluvastatin
	Database	Group	Pathway term	Fold Enrichment	Upregulated protein number	Population protein number	p Value	FDR	-log10 p	-log10FDR	Genes				Upregulated Total	Background Total
	GOTERM_BP_DIRECT	Sterol biosynthesis	GO:0033490~cholesterol biosynthetic process via lathosterol	126.15	11	20	5.97e-20	1e-17	19.224	17	FDPS, SQLE, NSDHL, PMVK, MVD, DHCR7, HMGCR, HSD17B7, LSS, CYP51, FDFT1
	GOTERM_BP_DIRECT	Sterol biosynthesis	GO:0033489~cholesterol biosynthetic process via desmosterol	126.15	11	20	5.97e-20	1e-17	19.224	17	FDPS, SQLE, NSDHL, PMVK, MVD, DHCR7, HMGCR, HSD17B7, LSS, CYP51, FDFT1
	GOTERM_BP_DIRECT	Sterol biosynthesis	GO:0006695~cholesterol biosynthetic process	100.92	11	25	1.04e-18	1.06e-16	17.983	15.9747	FDPS, SQLE, NSDHL, PMVK, MVD, DHCR7, HMGCR, HSD17B7, LSS, CYP51, FDFT1
	GOTERM_BP_DIRECT	Sterol biosynthesis	GO:0036197~zymosterol biosynthetic process	143.35	10	16	1.26e-18	1.06e-16	17.8996	15.9747	FDPS, SQLE, NSDHL, PMVK, MVD, HMGCR, HSD17B7, LSS, CYP51, FDFT1
	GOTERM_BP_DIRECT	Sterol biosynthesis	GO:0006694~steroid biosynthetic process	69.5	10	33	4.04e-15	2.71e-13	14.3936	12.567	FDPS, NSDHL, PMVK, MVD, DHCR7, HMGCR, HSD17B7, LSS, CYP51, FDFT1
	GOTERM_BP_DIRECT	Sterol biosynthesis	GO:0016126~sterol biosynthetic process	98.29	9	21	7.09e-15	3.97e-13	14.1494	12.4012	FDPS, SQLE, NSDHL, PMVK, MVD, DHCR7, HMGCR, CYP51, FDFT1
	GOTERM_BP_DIRECT	Sterol biosynthesis	GO:0008203~cholesterol metabolic process	48.8	10	47	1.38e-13	6.64e-12	12.8601	11.1778	FDPS, SQLE, NSDHL, PMVK, MVD, DHCR7, HMGCR, LDLR, CYP51, FDFT1
	GOTERM_BP_DIRECT	Sterol biosynthesis	GO:0008202~steroid metabolic process	40.47	9	51	2.05e-11	8.62e-10	10.6883	9.06449	FDPS, NSDHL, PMVK, MVD, DHCR7, HMGCR, LDLR, CYP51, FDFT1
	GOTERM_BP_DIRECT	Sterol biosynthesis	GO:0006629~lipid metabolic process	8.15	13	366	1.08e-08	4.03e-07	7.96658	6.39469	FDPS, HMGCR, HSD17B7, LSS, CYP51, SQLE, ACLY, NSDHL, PMVK, MVD, DHCR7, LDLR, FDFT1
	GOTERM_BP_DIRECT	Sterol biosynthesis	GO:0008299~isoprenoid biosynthetic process	83.4	4	11	1.09e-05	0.000367	4.96257	3.43533	FDPS, MVD, HMGCR, FDFT1
	GOTERM_BP_DIRECT	Sterol biosynthesis	GO:0019287~isopentenyl diphosphate biosynthetic process, mevalonate pathway	114.68	3	6	0.000255	0.0078	3.59346	2.10791	PMVK, MVD, HMGCR
	KEGG_PATHWAY	Sterol biosynthesis	mmu00100:Steroid biosynthesis	74.98	7	14	1.02e-10	1.28e-08	9.9914	7.89279	SQLE, NSDHL, DHCR7, HSD17B7, LSS, CYP51, FDFT1
	KEGG_PATHWAY	Sterol biosynthesis	mmu00900:Terpenoid backbone biosynthesis	29.99	4	20	0.000245	0.0154	3.61083	1.81248	FDPS, PMVK, MVD, HMGCR
	KEGG_PATHWAY		mmu01100:Metabolic pathways	2.59	14	811	0.000469	0.0197	3.32883	1.70553	FDPS, PYCR1, HMGCR, HSD17B7, LSS, CYP51, SQLE, ACLY, NSDHL, PMVK, MVD, DHCR7, PCK2, FDFT1

## Sheet: 3 Fluvastatin in CF media
	Database	Group	Pathway term	Fold Enrichment	Upregulated protein number	Population protein number	p Value	FDR	-log10 p	-log10FDR	Genes
	GOTERM_BP_DIRECT	Sterol biosynthesis	GO:0033489~cholesterol biosynthetic process via desmosterol	114.677	10	20	1.83e-17	2.83e-15	16.74	14.55	SQLE, NSDHL, PMVK, DHCR24, MVD, DHCR7, HMGCR, HSD17B7, LSS, CYP51
	GOTERM_BP_DIRECT	Sterol biosynthesis	GO:0033490~cholesterol biosynthetic process via lathosterol	114.677	10	20	1.83e-17	2.83e-15	16.74	14.55	SQLE, NSDHL, PMVK, DHCR24, MVD, DHCR7, HMGCR, HSD17B7, LSS, CYP51
	GOTERM_BP_DIRECT	Sterol biosynthesis	GO:0006695~cholesterol biosynthetic process	91.7419	10	25	2.19e-16	2.26e-14	15.66	13.65	SQLE, NSDHL, PMVK, DHCR24, MVD, DHCR7, HMGCR, HSD17B7, LSS, CYP51
	GOTERM_BP_DIRECT	Sterol biosynthesis	GO:0036197~zymosterol biosynthetic process	114.677	8	16	1.25e-13	9.68e-12	12.9	11.01	SQLE, NSDHL, PMVK, MVD, HMGCR, HSD17B7, LSS, CYP51
	GOTERM_BP_DIRECT	Sterol biosynthesis	GO:0006694~steroid biosynthetic process	62.5513	9	33	4.7e-13	2.91e-11	12.33	10.54	NSDHL, PMVK, DHCR24, MVD, DHCR7, HMGCR, HSD17B7, LSS, CYP51
	GOTERM_BP_DIRECT	Sterol biosynthesis	GO:0016126~sterol biosynthetic process	87.3733	8	21	1.25e-12	6.47e-11	11.9	10.19	SQLE, NSDHL, PMVK, DHCR24, MVD, DHCR7, HMGCR, CYP51
	GOTERM_BP_DIRECT	Sterol biosynthesis	GO:0008203~cholesterol metabolic process	43.919	9	47	1.02e-11	4.54e-10	10.99	9.34	SQLE, NSDHL, PMVK, DHCR24, MVD, DHCR7, HMGCR, LDLR, CYP51
	GOTERM_BP_DIRECT	Sterol biosynthesis	GO:0008202~steroid metabolic process	35.9772	8	51	1.14e-09	4.44e-08	8.94	7.35	NSDHL, PMVK, DHCR24, MVD, DHCR7, HMGCR, LDLR, CYP51
	GOTERM_BP_DIRECT	Sterol biosynthesis	GO:0006629~lipid metabolic process	7.51983	12	366	1.31e-07	4.5e-06	6.88	5.35	SQLE, NSDHL, PMVK, DHCR24, MVD, DHCR7, ACSL3, HMGCR, HSD17B7, LDLR, LSS, CYP51
	GOTERM_BP_DIRECT	Sterol biosynthesis	GO:0019287~isopentenyl diphosphate biosynthetic process, mevalonate pathway	114.677	3	6	0.000255	0.00792	3.59	2.1	PMVK, MVD, HMGCR
	GOTERM_BP_DIRECT	Sterol biosynthesis	GO:0016125~sterol metabolic process	76.4516	3	9	0.000608	0.017144	3.22	1.77	SQLE, DHCR24, LSS
	GOTERM_BP_DIRECT	Protein synthesis	GO:0015824~proline transport	114.677	2	4	0.016775	0.433345	1.78	0.36	SLC3A2, SLC38A2
	GOTERM_BP_DIRECT	Other	GO:1900222~negative regulation of amyloid-beta clearance	76.4516	2	6	0.02506	0.597576	1.6	0.22	HMGCR, CYP51
	GOTERM_BP_DIRECT	Other	GO:0160020~positive regulation of ferroptosis	65.5299	2	7	0.029177	0.644744	1.53	0.19	DHCR7, PCK2
	GOTERM_BP_DIRECT	Other	GO:0050709~negative regulation of protein secretion	57.3387	2	8	0.033277	0.644744	1.48	0.19	HMGCR, CYP51
	GOTERM_BP_DIRECT	Protein synthesis	GO:0015804~neutral amino acid transport	57.3387	2	8	0.033277	0.644744	1.48	0.19	SLC3A2, SLC38A2
	GOTERM_BP_DIRECT	Other	GO:0001516~prostaglandin biosynthetic process	50.9677	2	9	0.037361	0.681283	1.43	0.17	CD74, SIGMAR1
	GOTERM_BP_DIRECT	Sterol biosynthesis	GO:0008299~isoprenoid biosynthetic process	41.7009	2	11	0.045478	0.757172	1.34	0.12	MVD, HMGCR
	GOTERM_BP_DIRECT	Other	GO:0006869~lipid transport	8.39103	3	82	0.046407	0.757172	1.33	0.12	OSBPL8, SIGMAR1, LDLR
	KEGG_PATHWAY	Sterol biosynthesis	mmu00100:Steroid biosynthesis	98.6579	7	14	1.42e-11	7.95e-10	10.85	9.1	SQLE, NSDHL, DHCR24, DHCR7, HSD17B7, LSS, CYP51
	KEGG_PATHWAY	Sterol biosynthesis	mmu01100:Metabolic pathways	3.16289	13	811	4.91e-05	0.001375	4.31	2.86	DHCR24, ACSL3, HMGCR, HSD17B7, LSS, CYP51, GLS, SQLE, NSDHL, PMVK, MVD, DHCR7, PCK2
	KEGG_PATHWAY	Sterol biosynthesis	mmu00900:Terpenoid backbone biosynthesis	29.5974	3	20	0.003931	0.073379	2.41	1.13	PMVK, MVD, HMGCR
	KEGG_PATHWAY	Other	mmu04964:Proximal tubule bicarbonate reclamation	49.3289	2	8	0.037806	0.475275	1.42	0.32	GLS, PCK2
	KEGG_PATHWAY	Sterol biosynthesis	mmu04913:Ovarian steroidogenesis	43.8479	2	9	0.042435	0.475275	1.37	0.32	HSD17B7, LDLR
