# Supplementary material for: Lipopolysaccharide stimulates dynamic changes in B cell metabolism to promote proliferation
Source: eLife. 2026 May 21;14:RP109093. doi: 10.7554/eLife.109093 (PMC13193715; doi:10.7554/eLife.109093)
Supplement: Supplementary file 3. [file elife-109093-supp3.xlsx]

## Sheet: naive and LPS+IL4 spectronaut19
PG.ProteinAccessions	PG.Genes	PG.ProteinDescriptions	PG.ProteinNames	PG.MolecularWeight	[1] LPS + IL-4-1.raw.PG.NrOfStrippedSequencesUsedForQuantification	[2] LPS + IL-4.raw.PG.NrOfStrippedSequencesUsedForQuantification	[3] LPS + IL-4-3.raw.PG.NrOfStrippedSequencesUsedForQuantification	[4] LPS + IL-4-4.raw.PG.NrOfStrippedSequencesUsedForQuantification	[5] Naive-1.raw.PG.NrOfStrippedSequencesUsedForQuantification	[6] Naive-2.raw.PG.NrOfStrippedSequencesUsedForQuantification	[7] Naive-3.raw.PG.NrOfStrippedSequencesUsedForQuantification	[1] LPS + IL-4-1.raw.PG.Quantity	[2] LPS + IL-4.raw.PG.Quantity	[3] LPS + IL-4-3.raw.PG.Quantity	[4] LPS + IL-4-4.raw.PG.Quantity	[5] Naive-1.raw.PG.Quantity	[6] Naive-2.raw.PG.Quantity	[7] Naive-3.raw.PG.Quantity	PG.ProteinAccessions	PG.Genes	PG.MolecularWeight	Histones	PG.MolecularWeight	PG.Genes	Copy number [1] LPS + IL-4-R1	Copy number [2] LPS + IL-4-R2	Copy number [3] LPS + IL-4-R3	Copy number [4] LPS + IL-4-R4	Copy number [5] Naive-R1	Copy number [6] Naive-R2	Copy number [7] Naive-R3	PG.Genes	Concentration [nM] [1] LPS + IL-4-R1	Concentration [nM] [2] LPS + IL-4-R2	Concentration [nM] [3] LPS + IL-4-R3	Concentration [nM] [4] LPS + IL-4-R4	Concentration [nM] [5] Naive-R1	Concentration [nM] [6] Naive-R2	Concentration [nM] [7] Naive-R3	PG.ProteinAccessions	PG.Genes	n naïve	n LPS+IL-4	average naïve copies	average LPS+IL-4 copies	log2 FC copies	neg log p copies	neg log q copies
Q6GQT1	A2m	Alpha-2-macroglobulin-P	A2MG_MOUSE	164353	5	5	4	4	4	4	4	18437918	30470968	18643308	10626407	26248508	25189690	37681808	Q6GQT1	A2m	164353		164353	A2m	5939.33	10540.2	7017.86	3604.53	6371.58	6362.99	8455.68	A2m	43.5376	62.8777	41.6809	27.7762	85.4253	80.4706	97.0897	Q6GQT1	A2m	3	4	7063.42	6775.48	-0.0600434	0.142319	0.419123
P58742	Aaas	Aladin	AAAS_MOUSE	59430.7	11	12	12	11	14	15	16	6.151e+06	8365746	8.26296e+06	7115666	3.76914e+06	4.65381e+06	6.19566e+06	P58742	Aaas	59430.7		59430.7	Aaas	5479.45	8002.64	8601.68	6674.87	2530.17	3250.97	3844.77	Aaas	40.1665	47.7398	51.0877	51.4361	33.9226	41.1139	44.1463	P58742	Aaas	3	4	3208.64	7189.66	1.16396	2.43943	2.40471
Q9D2R0	Aacs	Acetoacetyl-CoA synthetase	AACS_MOUSE	75200.2	33	31	35	32	18	20	22	78722016	94556320	102036872	72942640	10944529	11492854	15999474	Q9D2R0	Aacs	75200.2		75200.2	Aacs	55421.6	71484.3	83945.3	54075.5	5806.27	6344.89	7846.58	Aacs	406.263	426.441	498.574	416.703	77.8461	80.2417	90.0959	Q9D2R0	Aacs	3	4	6665.91	66231.7	3.31265	4.72178	3.53117	up
Q8R2R3	Aagab	Alpha- and gamma-adaptin-binding protein p34	AAGAB_MOUSE	34510.5	9	8	9	8	8	9	8	3.28832e+06	3.54148e+06	3.81908e+06	3.0245e+06	1.90703e+06	1.96198e+06	2.64444e+06	Q8R2R3	Aagab	34510.5		34510.5	Aagab	5044.58	5834.08	6846.46	4885.86	2204.57	2360.25	2826.02	Aagab	36.9787	34.8033	40.6629	37.6501	29.5572	29.8493	32.4489	Q8R2R3	Aagab	3	4	2463.62	5652.74	1.19817	3.1735	2.92859
Q3UHJ0;Q3UHJ0-2	Aak1	AP2-associated protein kinase 1;Isoform 2 of AP2-associated protein kinase 1	AAK1_MOUSE	103346.24;103346.24-2	21	20	24	24	25	26	26	14552590	17817750	15878589	13789218	12728212	12209743	15690160	Q3UHJ0	Aak1	103346		103346	Aak1	7455	9801.61	9505.51	7438.47	4913.51	4904.87	5599.21	Aak1	54.6481	58.4717	56.4558	57.3203	65.8766	62.0302	64.2911	Q3UHJ0	Aak1	3	4	5139.19	8550.15	0.734408	2.46883	2.42784
Q8R0P4	Aamdc	Mth938 domain-containing protein	AAMDC_MOUSE	13244.1	8	7	7	7	8	8	7	3.00802e+06	2.83893e+06	3.20174e+06	2.98911e+06	4.62675e+06	4.53528e+06	3.1383e+06	Q8R0P4	Aamdc	13244.1		13244.1	Aamdc	12024.3	12186.3	14956.2	12582.2	13937.1	14216.6	8739.08	Aamdc	88.1429	72.6974	88.829	96.958	186.858	179.793	100.344	Q8R0P4	Aamdc	3	4	12297.6	12937.3	0.0731545	0.187795	0.458997
J3QN89;Q3TJ22;Q8K2C1	Aamp	J3Angio-associated migratory protein;Q3Angio-associated migratory protein;Q8K2Aamp protein	J3QN89_MOU;Q3TJ22_MOU;Q8K2C1_M	46966.07;46895;38509.31	13	13	12	12	10	10	9	27081438	28452068	26256790	22047484	4.50398e+06	4592714	5.84787e+06	J3QN89	Aamp	46966.1		46966.1	Aamp	30527.4	34440.5	34587.2	26170.6	3825.88	4059.76	4592.06	Aamp	223.778	205.455	205.423	201.669	51.2945	51.3424	52.7268	J3QN89	Aamp	3	4	4159.23	31431.4	2.91782	5.49061	3.54351	up
Q9D2V5	Aar2	Protein AAR2 homolog	AAR2_MOUSE	43408	11	11	12	11	9	11	10	4964896	4.75789e+06	4684811	3.85507e+06	1.151e+06	1.54708e+06	3.41093e+06	Q9D2V5	Aar2	43408		43408	Aar2	6055.4	6231.38	6676.99	4951.09	1057.85	1479.65	2897.99	Aar2	44.3885	37.1734	39.6564	38.1528	14.1829	18.7126	33.2753	Q9D2V5	Aar2	3	4	1811.83	5978.71	1.72239	2.3605	2.34252
Q8BGQ7	Aars1	Alanine--tRNA ligase, cytoplasmic	SYAC_MOUSE	106909	52	53	51	52	47	48	46	211219184	245767344	241991264	191584640	45298628	46122852	56522012	Q8BGQ7	Aars1	106909		106909	Aars1	104598	130693	140038	99904.9	16904.1	17911	19498.4	Aars1	766.745	779.649	831.723	769.86	226.637	226.514	223.884	Q8BGQ7	Aars1	3	4	18104.5	118808	2.71422	5.01835	3.54164	up
Q14CH7	Aars2	Alanine--tRNA ligase, mitochondrial	SYAM_MOUSE	106783	19	19	19	19	14	16	10	3.91231e+06	5.64012e+06	5025142	4321789	2.06872e+06	1.33932e+06	1.26946e+06	Q14CH7	Aars2	106783		106783	Aars2	1939.69	3002.78	2911.41	2256.31	772.89	520.709	438.44	Aars2	14.2187	17.9131	17.2916	17.387	10.3623	6.58523	5.03425	Q14CH7	Aars2	3	4	577.346	2527.55	2.13023	3.2953	2.99896
Q3THG9	Aarsd1	Alanyl-tRNA editing protein Aarsd1	AASD1_MOUSE	44970.9	16	15	14	13	14	15	14	20362328	24987176	24605834	17622122	7923262	7999720	8.11815e+06	Q3THG9	Aarsd1	44970.9		44970.9	Aarsd1	23971.7	31588.2	33850.5	21845.6	7028.96	7385.13	6657.62	Aarsd1	175.722	188.44	201.047	168.341	94.2391	93.3973	76.444	Q3THG9	Aarsd1	3	4	7023.91	27814	1.98547	3.90153	3.33019
Q9CQF6	Aasdhppt	L-aminoadipate-semialdehyde dehydrogenase-phosphopantetheinyl transferase	ADPPT_MOUSE	35764.1	10	11	12	10	6	8	6	4.15079e+06	5.54558e+06	5.52395e+06	3.44582e+06	812507	847692	894131	Q9CQF6	Aasdhppt	35764.1		35764.1	Aasdhppt	6144.49	8815.33	9555.66	5371.35	906.355	984.024	922.034	Aasdhppt	45.0415	52.588	56.7536	41.3913	12.1517	12.4446	10.587	Q9CQF6	Aasdhppt	3	4	937.471	7471.71	2.99459	4.21057	3.45121	up
Q9JKX4	Aatf	Protein AATF	AATF_MOUSE	59482.1	21	21	22	19	21	21	20	33298418	36991160	33783372	27292660	9513987	9703839	12533058	Q9JKX4	Aatf	59482.1		59482.1	Aatf	29637.4	35355	35137.8	25579.8	6381.09	6772.86	7770.77	Aatf	217.254	210.911	208.693	197.117	85.5529	85.6541	89.2255	Q9JKX4	Aatf	3	4	6974.91	31427.5	2.17178	4.54431	3.50698
P41233	Abca1	Phospholipid-transporting ATPase ABCA1	ABCA1_MOUSE	253912	0	0	0	0	2	2	2	NaN	NaN	NaN	NaN	92281.5	126038	176189	P41233	Abca1	253912		253912	Abca1					14.4994	20.6079	25.5911	Abca1					0.194397	0.260621	0.293842	P41233	Abca1	3		20.2328					down-a
Q8R420	Abca3	Phospholipid-transporting ATPase ABCA3	ABCA3_MOUSE	191971	7	6	5	7	9	10	9	739401	910155	835237	748670	921189	1303281	1458457	Q8R420	Abca3	191971		191971	Abca3	203.914	269.538	269.174	217.417	191.44	281.85	280.19	Abca3	1.49477	1.60793	1.59869	1.6754	2.56668	3.56446	3.21719	Q8R420	Abca3	3	4	251.16	240.011	-0.0655077	0.0996968	0.382032
Q91V24	Abca7	ATP-binding cassette sub-family A member 7	ABCA7_MOUSE	236884	0	0	0	0	3	3	3	NaN	NaN	NaN	NaN	235812	224430	263905	Q91V24	Abca7	236884		236884	Abca7					39.7146	39.3333	41.0872	Abca7					0.532463	0.497435	0.471771	Q91V24	Abca7	3		40.045					down-a
Q9JI39	Abcb10	ATP-binding cassette sub-family B member 10, mitochondrial	ABCBA_MOUSE	77188	12	12	14	14	15	15	16	4933591	6029230	7070162	5.68724e+06	5642058	5.03598e+06	6.56538e+06	Q9JI39	Abcb10	77188		77188	Abcb10	3383.88	4440.7	5666.8	4107.62	2916.13	2708.63	3136.92	Abcb10	24.8052	26.491	33.6566	31.653	39.0973	34.2551	36.0187	Q9JI39	Abcb10	3	4	2920.56	4399.75	0.591178	1.52521	1.65471
P06795;P21447	Abcb1b;Abcb1a	ATP-dependent translocase ABCB1	MDR1B_MOUSE;MDR1A_MOUSE	140993.74;140646.51	4	6	4	3	0	0	0	684151	1.12959e+06	842943	477743	NaN	NaN	NaN	P06795	Abcb1b	140994		140994	Abcb1b	256.894	455.472	369.876	188.9				Abcb1b	1.88314	2.71712	2.19679	1.45565				P06795	Abcb1b		4		317.786				up-a
Q9DC29	Abcb6	ATP-binding cassette sub-family B member 6	ABCB6_MOUSE	93770.4	8	8	7	6	0	0	4	1988807	2.45189e+06	2171674	1.74109e+06	NaN	NaN	693870	Q9DC29	Abcb6	93770.4		93770.4	Abcb6	1122.87	1486.53	1432.81	1035.13			272.901	Abcb6	8.23108	8.86792	8.50981	7.97661			3.1335	Q9DC29	Abcb6	1	4	272.901	1269.33	2.21762	2.33171	2.32008	up
Q61102	Abcb7	Iron-sulfur clusters transporter ABCB7, mitochondrial	ABCB7_MOUSE	82580.9	21	22	22	22	26	27	27	22363018	25778220	22819902	19472306	21480646	20499516	28941388	Q61102	Abcb7	82580.9		82580.9	Abcb7	14336.8	17746.5	17095.9	13145.5	10377.4	10305.7	12925.1	Abcb7	105.095	105.867	101.537	101.298	139.132	130.333	148.408	Q61102	Abcb7	3	4	11202.7	15581.2	0.475954	1.58417	1.70569
Q9CXJ4	Abcb8	Mitochondrial potassium channel ATP-binding subunit	MITOS_MOUSE	77999.6	10	10	10	8	11	12	11	2.37244e+06	2.41643e+06	3.69435e+06	1.82475e+06	1.98402e+06	1.75425e+06	2.03118e+06	Q9CXJ4	Abcb8	77999.6		77999.6	Abcb8	1610.29	1761.25	2930.25	1304.21	1014.78	933.714	960.395	Abcb8	11.8041	10.5068	17.4035	10.0502	13.6054	11.8084	11.0274	Q9CXJ4	Abcb8	3	4	969.63	1901.5	0.971632	1.55687	1.68244
O35379	Abcc1	Multidrug resistance-associated protein 1	MRP1_MOUSE	171185	25	22	26	18	12	14	11	6759569	7369834	8.09362e+06	5.65064e+06	1.52741e+06	1.8886e+06	1.6403e+06	O35379	Abcc1	171185		171185	Abcc1	2090.53	2447.55	2925.07	1840.23	355.968	458.026	353.388	Abcc1	15.3244	14.6009	17.3728	14.1807	4.77255	5.7925	4.05767	O35379	Abcc1	3	4	389.127	2325.85	2.57944	4.29679	3.47934	up
E9Q236;E9Q236-2;E9Q236-3	Abcc4	ATP-binding cassette sub-family C member 4;Isoform 2 of ATP-binding cassette sub-family C member 4;Isoform 3 of ATP-binding cassette sub-family C member 4	MRP4_MOUSE	148888.09;148888.09-2;148888.09-3	14	11	17	12	8	15	12	2.70095e+06	2.35819e+06	3225825	2.06407e+06	589649	1.30843e+06	1.54754e+06	E9Q236	Abcc4	148888		148888	Abcc4	960.415	900.447	1340.41	772.864	157.998	364.843	383.332	Abcc4	7.04022	5.37163	7.96108	5.95564	2.11832	4.61405	4.40149	E9Q236	Abcc4	3	4	302.058	993.535	1.71775	2.18883	2.20677
P48410	Abcd1	ATP-binding cassette sub-family D member 1	ABCD1_MOUSE	81858.9	18	16	18	14	24	24	22	10418937	11283773	125933320	10680433	23149464	24942594	28555838	P48410	Abcd1	81858.9		81858.9	Abcd1	6738.45	7836.61	95177.3	7273.8	11282.2	12650	12865.4	Abcd1	49.3955	46.7494	565.283	56.0515	151.263	159.981	147.723	P48410	Abcd1	3	4	12265.9	29256.5	1.25411	0.0557089	0.343937
P55096	Abcd3	ATP-binding cassette sub-family D member 3	ABCD3_MOUSE	75474.6	15	13	12	11	11	10	9	8.01137e+06	6.2222e+06	6.19838e+06	5297561	2.15956e+06	1760087	2.77567e+06	P55096	Abcd3	75474.6		75474.6	Abcd3	5619.64	4686.87	5080.84	3913.03	1141.52	968.163	1356.31	Abcd3	41.1942	27.9596	30.1765	30.1536	15.3046	12.244	15.5735	P55096	Abcd3	3	4	1155.33	4825.09	2.06225	4.10351	3.41215
O89016	Abcd4	Lysosomal cobalamin transporter ABCD4	ABCD4_MOUSE	68583.1	1	2	4	0	7	8	5	110008	271111	487677	NaN	733183	741188	585729	O89016	Abcd4	68583.1		68583.1	Abcd4	84.9195	224.734	439.919		426.495	448.669	314.973	Abcd4	0.622494	1.34065	2.6128		5.71813	5.67417	3.61657	O89016	Abcd4	3	3	396.712	249.857	-0.666988	0.600139	0.829279
P61222	Abce1	ATP-binding cassette sub-family E member 1	ABCE1_MOUSE	67314.3	35	35	33	33	37	35	38	159013216	199215136	180568112	147829760	60593840	56923524	72087992	P61222	Abce1	67314.3		67314.3	Abce1	125063	168250	165956	122431	35912	35107.5	39495.6	Abce1	916.76	1003.7	985.654	943.448	481.482	443.992	453.496	P61222	Abce1	3	4	36838.4	145425	1.98099	4.2732	3.46932
Q6P542	Abcf1	ATP-binding cassette sub-family F member 1	ABCF1_MOUSE	94945.4	34	34	37	36	34	36	36	108078944	139544400	118119672	92663936	39106340	39298596	51132668	Q6P542	Abcf1	94945.4		94945.4	Abcf1	60265.6	83556	76967.3	54409.6	16432.1	17183.8	19861.8	Abcf1	441.771	498.455	457.13	419.276	220.309	217.317	228.057	Q6P542	Abcf1	3	4	17825.9	68799.6	1.94843	3.85158	3.31121
Q99LE6	Abcf2	ATP-binding cassette sub-family F member 2	ABCF2_MOUSE	71781.7	31	31	31	29	24	28	26	80774904	104269112	103451432	75145872	12388457	13689634	15613723	Q99LE6	Abcf2	71781.7		71781.7	Abcf2	59575.1	82581.2	89162.2	58361.9	6885.29	7917.59	8022.07	Abcf2	436.709	492.639	529.558	449.733	92.3128	100.131	92.1109	Q99LE6	Abcf2	3	4	7608.32	72420.1	3.25074	4.82194	3.54164	up
Q8K268	Abcf3	ATP-binding cassette sub-family F member 3	ABCF3_MOUSE	79864.8	27	29	30	30	26	25	26	25256528	26959744	25654750	20836810	10414118	9582952	12446366	Q8K268	Abcf3	79864.8		79864.8	Abcf3	16742.5	19191.1	19873.3	14545	5202.19	4981.49	5747.53	Abcf3	122.729	114.485	118.033	112.083	69.747	62.9992	65.9942	Q8K268	Abcf3	3	4	5310.4	17588	1.7277	4.32545	3.48074
Q64343	Abcg1	ATP-binding cassette sub-family G member 1	ABCG1_MOUSE	74033.2	0	1	1	1	3	3	3	NaN	168494	115315	90322.1	439258	436093	618557	Q64343	Abcg1	74033.2		74033.2	Abcg1		129.389	96.365	68.0152	236.708	244.55	308.139	Abcg1		0.771874	0.572338	0.524121	3.1736	3.09274	3.53811	Q64343	Abcg1	3	3	263.132	97.9232	-1.42607	2.12184	2.15407	down
Q99P81	Abcg3	ATP-binding cassette sub-family G member 3	ABCG3_MOUSE	73613.2	3	3	3	3	8	5	6	222314	272145	191804	193646	670986	455239	804603	Q99P81	Abcg3	73613.2		73613.2	Abcg3	159.887	210.176	161.198	146.653	363.644	256.743	403.106	Abcg3	1.17204	1.25381	0.957397	1.1301	4.87547	3.24695	4.62854	Q99P81	Abcg3	3	4	341.165	169.479	-1.00936	2.27677	2.27677	down
Q99PE8	Abcg5	ATP-binding cassette sub-family G member 5	ABCG5_MOUSE	73244.4	0	0	0	1	0	0	0	NaN	NaN	NaN	638430	NaN	NaN	NaN	Q99PE8	Abcg5	73244.4		73244.4	Abcg5				485.934				Abcg5				3.74458				Q99PE8	Abcg5		1		485.934
Q6PE15	Abhd10	Palmitoyl-protein thioesterase ABHD10, mitochondrial	ABHDA_MOUSE	33040.5	8	8	10	9	8	10	10	2.88468e+06	4450445	4237161	3.36721e+06	2.08336e+06	2.64108e+06	3941351	Q6PE15	Abhd10	33040.5		33040.5	Abhd10	4622.25	7657.67	7933.9	5681.49	2515.57	3318.56	4399.39	Abhd10	33.8829	45.6819	47.1216	43.7811	33.7269	41.9688	50.5146	Q6PE15	Abhd10	3	4	3411.18	6473.83	0.92435	1.60129	1.71991
Q8K4F5	Abhd11	Protein ABHD11	ABHDB_MOUSE	33560.6	9	9	9	7	8	8	9	4.82866e+06	5709566	5.17122e+06	3.55803e+06	4.24837e+06	4648635	6.55898e+06	Q8K4F5	Abhd11	33560.6		33560.6	Abhd11	7617.27	9671.92	9532.83	5910.42	5050.24	5750.57	7207.76	Abhd11	55.8376	57.698	56.618	45.5453	67.7098	72.7256	82.7609	Q8K4F5	Abhd11	3	4	6002.86	8183.11	0.447	0.912892	1.111
Q99LR1	Abhd12	Lysophosphatidylserine lipase ABHD12	ABD12_MOUSE	45269.8	12	14	15	14	20	20	20	7949670	12550918	8740239	7615691	10786837	11315039	18284932	Q99LR1	Abhd12	45269.8		45269.8	Abhd12	9297	15761.8	11944.6	9378.63	9506.15	10376.8	14896.3	Abhd12	68.1507	94.0273	70.9424	72.2711	127.451	131.232	171.042	Q99LR1	Abhd12	3	4	11593.1	11595.5	0.000303983	0.00777833	0.302428
G3UZN6;S4R2K4	Abhd12b	G3Abhydrolase domain containing 12B;S4R2Abhydrolase domain containing 12B	G3UZN6_MOU;S4R2K4_M	40302.73;31527.15	0	1	0	0	0	0	1	NaN	227123	NaN	NaN	NaN	NaN	188467	G3UZN6	Abhd12b	40302.7		40302.7	Abhd12b		320.381					172.463	Abhd12b		1.91124					1.98025	G3UZN6	Abhd12b	1	1	172.463	320.381	0.893504
Q80UX8	Abhd13	Protein ABHD13	ABHDD_MOUSE	38525.1	6	4	5	3	3	2	2	1.34458e+06	1.26393e+06	3.93573e+06	2.73651e+06	778051	394487	728214	Q80UX8	Abhd13	38525.1		38525.1	Abhd13	1847.76	1865.17	6320.34	3959.97	805.719	425.113	697.123	Abhd13	13.5448	11.1267	37.5382	30.5152	10.8025	5.37626	8.00449	Q80UX8	Abhd13	3	4	642.652	3498.31	2.44455	2.01231	2.06572	up
Q8VCR7	Abhd14b	Putative protein-lysine deacylase ABHD14B	ABHEB_MOUSE	22450.7	8	7	8	8	9	9	9	3.92879e+06	3.72094e+06	4497173	3.84887e+06	4789891	5.13715e+06	7.34114e+06	Q8VCR7	Abhd14b	22450.7		22450.7	Abhd14b	9264.68	9422.41	12392.7	9557.43	8511.66	9499.63	12059.4	Abhd14b	67.9138	56.2095	73.6038	73.6489	114.118	120.139	138.469	Q8VCR7	Abhd14b	3	4	10023.6	10159.3	0.0194062	0.0490492	0.337954
Q9Z1Q2	Abhd16a	Phosphatidylserine lipase ABHD16A	ABHGA_MOUSE	63086.2	11	8	6	7	9	11	10	5091780	2.75719e+06	2093991	2.0029e+06	4.25854e+06	2.95867e+06	3.78213e+06	Q9Z1Q2	Abhd16a	63086.2		63086.2	Abhd16a	4273.05	2484.69	2053.52	1769.96	2693.06	1947.05	2211.04	Abhd16a	31.3231	14.8224	12.1964	13.6392	36.1065	24.6237	25.3875	Q9Z1Q2	Abhd16a	3	4	2283.72	2645.3	0.212051	0.151296	0.426833
Q99JW1	Abhd17a	Alpha/beta hydrolase domain-containing protein 17A	AB17A_MOUSE	33949.8	4	3	4	3	7	8	7	879822	1.76746e+06	1.95854e+06	1.33636e+06	1.9376e+06	3.12877e+06	3539819	Q99JW1	Abhd17a	33949.8		33949.8	Abhd17a	1372.02	2959.73	3569.06	2194.44	2276.91	3826.06	3845.37	Abhd17a	10.0575	17.6563	21.1976	16.9102	30.5271	48.3868	44.1532	Q99JW1	Abhd17a	3	4	3316.11	2523.81	-0.393888	0.475319	0.71696
Q7M759	Abhd17b	Alpha/beta hydrolase domain-containing protein 17B	AB17B_MOUSE	32200.8	13	11	11	11	15	15	14	5.24746e+06	5593101	4779770	4.14054e+06	7.12231e+06	5997401	8997218	Q7M759	Abhd17b	32200.8		32200.8	Abhd17b	8627.51	9874.75	9183.31	7168.51	8824.18	7732.36	10304.7	Abhd17b	63.2431	58.908	54.5421	55.2401	118.308	97.7886	118.321	Q7M759	Abhd17b	3	4	8953.75	8713.52	-0.0392364	0.0918757	0.375147
Q9QXM0	Abhd2	Monoacylglycerol lipase ABHD2	ABHD2_MOUSE	48377.9	3	5	3	3	0	0	0	416726	615693	381878	440398	NaN	NaN	NaN	Q9QXM0	Abhd2	48377.9		48377.9	Abhd2	456.044	723.53	488.355	507.501				Abhd2	3.34298	4.31623	2.90047	3.91077				Q9QXM0	Abhd2		4		543.857				up-a
Q8R2Y0;Q8R2Y0-2	Abhd6	Monoacylglycerol lipase ABHD6;Isoform 2 of Monoacylglycerol lipase ABHD6	ABHD6_MOUSE	38204.5;38204.5-2	14	13	10	9	10	8	11	27283018	6.71294e+06	4.74282e+06	3889129	3.18195e+06	2771167	13160584	Q8R2Y0	Abhd6	38204.5		38204.5	Abhd6	37807.7	9989.35	7680.34	5675.14	3322.75	3011.37	12704.4	Abhd6	277.145	59.5916	45.6156	43.7322	44.549	38.0837	145.874	Q8R2Y0	Abhd6	3	4	6346.17	15288.1	1.26845	0.59674	0.826527
Q8CBW3;Q8CBW3-2;Q8CBW3-3;Q8CBW3-4;Q8CBW3-5	Abi1	Abl interactor 1;Isoform 2 of Abl interactor 1;Isoform 3 of Abl interactor 1;Isoform 4 of Abl interactor 1;Isoform 5 of Abl interactor 1	ABI1_MOUSE	52287.51;52287.51-2;52287.51-3;52287.51-4;52287.51-5	20	20	18	20	18	16	18	32977678	39802496	48048116	33071028	23748708	23802972	31615566	Q8CBW3	Abi1	52287.5		52287.5	Abi1	33390.6	43276.5	56850.8	35260.5	18120.1	18899.4	22299.6	Abi1	244.766	258.166	337.652	271.715	242.941	239.015	256.048	Q8CBW3	Abi1	3	4	19773	42194.6	1.09352	2.33367	2.32167
Q8BYZ1	Abi3	ABI gene family member 3	ABI3_MOUSE	39106.6	12	12	13	13	17	16	17	14148610	18417444	14975551	11877152	23933086	22919424	25367686	Q8BYZ1	Abi3	39106.6		39106.6	Abi3	19154.3	26774.3	23691.4	16931.7	24415.6	24331.5	23923.5	Abi3	140.409	159.723	140.71	130.475	327.346	307.712	274.694	Q8BYZ1	Abi3	3	4	24223.5	21637.9	-0.162846	0.468358	0.710685
Q80ZQ9	Abitram	Protein Abitram	ABITM_MOUSE	21596.8	8	8	8	8	8	8	8	6970603	7.46876e+06	7324109	6.55724e+06	2.65802e+06	3.44778e+06	4.52994e+06	Q80ZQ9	Abitram	21596.8		21596.8	Abitram	17087.7	19660.7	20980.9	16926.6	4910.08	6627.74	7735.66	Abitram	125.26	117.286	124.611	130.436	65.8306	83.8188	88.8223	Q80ZQ9	Abitram	3	4	6424.49	18664	1.5386	3.41477	3.07419
P00520;P00520-2;P00520-3;P00520-4	Abl1	Tyrosine-protein kinase ABL1;Isoform II of Tyrosine-protein kinase ABL1;Isoform III of Tyrosine-protein kinase ABL1;Isoform IV of Tyrosine-protein kinase ABL1	ABL1_MOUSE	122672.53;122672.53-2;122672.53-3;122672.53-4	8	7	6	6	8	11	9	909975	776841	721291	629579	615260	1416353	1.16097e+06	P00520	Abl1	122673		122673	Abl1	392.721	360.018	363.765	286.116	200.092	479.335	349.035	Abl1	2.8788	2.14769	2.1605	2.20479	2.68269	6.06199	4.00769	P00520	Abl1	3	4	342.821	350.655	0.0325976	0.126156	0.405104
Q4JIM5	Abl2	Tyrosine-protein kinase ABL2	ABL2_MOUSE	128196	5	5	7	7	4	5	0	527339	685712	1.10496e+06	644658	180269	297097	NaN	Q4JIM5	Abl2	128196		128196	Abl2	217.779	304.092	533.249	280.344	56.1003	96.2138		Abl2	1.59641	1.81407	3.16711	2.16031	0.75215	1.21678		Q4JIM5	Abl2	2	4	76.157	333.866	2.13222	1.94658	2.01271
Q8K4G5;Q8K4G5-2;Q8K4G5-3	Ablim1	Actin-binding LIM protein 1;Isoform 2 of Actin-binding LIM protein 1;Isoform 3 of Actin-binding LIM protein 1	ABLM1_MOUSE	96804.71;96804.71-2;96804.71-3	24	25	26	28	28	28	27	32055962	34003036	32595588	29638110	38776076	39458368	48224288	Q8K4G5	Ablim1	96804.7		96804.7	Ablim1	17531.3	19969.2	20831.5	17068.4	15980.4	16922.2	18372.3	Ablim1	128.512	119.127	123.724	131.528	214.253	214.01	210.954	Q8K4G5	Ablim1	3	4	17091.6	18850.1	0.141283	0.677937	0.899649
Q5SSL4-4	Abr	Isoform 4 of Active breakpoint cluster region-related protein	ABR_MOUSE	93772.9	7	6	8	4	14	12	12	2.12258e+06	2.19579e+06	1.38241e+06	1.18536e+06	6180630	8.26076e+06	5.53567e+06	Q5SSL4	Abr	93772.9		93772.9	Abr	1198.37	1331.23	912.047	704.713	2629.51	3657.28	2177.14	Abr	8.7845	7.94147	5.41689	5.43047	35.2545	46.2524	24.9983	Q5SSL4	Abr	3	4	2821.31	1036.59	-1.44452	2.29785	2.29341	down
Q4KML4	Abracl	Costars family protein ABRACL	ABRAL_MOUSE	9030.41	3	3	3	3	3	3	4	18635854	29283894	26934432	20743844	37802464	21896536	32065442	Q4KML4	Abracl	9030.41		9030.41	Abracl	109256	184357	184526	128062	167006	100666	130955	Abracl	800.888	1099.79	1095.95	986.837	2239.09	1273.09	1503.65	Q4KML4	Abracl	3	4	132876	151550	0.18972	0.259054	0.522771
Q8BPZ8	Abraxas1	BRCA1-A complex subunit Abraxas 1	ABRX1_MOUSE	46039.1	10	12	9	9	12	12	12	4.44811e+06	4998367	3185580	2504680	6.38663e+06	7.71879e+06	9106603	Q8BPZ8	Abraxas1	46039.1		46039.1	Abraxas1	5115.06	6172.21	4280.75	3032.94	5534.31	6960.46	7294.97	Abraxas1	37.4954	36.8204	25.4245	23.3716	74.1999	88.0266	83.7622	Q8BPZ8	Abraxas1	3	4	6596.58	4650.24	-0.504412	0.963399	1.15478
Q3TCJ1	Abraxas2	BRISC complex subunit Abraxas 2	ABRX2_MOUSE	46942.8	15	15	14	15	17	17	17	14213061	17916834	16715586	13382110	12868992	14497114	16613740	Q3TCJ1	Abraxas2	46942.8		46942.8	Abraxas2	16029.5	21698.6	22029.8	15892.6	10936.9	12821.2	13052.5	Abraxas2	117.503	129.443	130.841	122.467	146.634	162.145	149.871	Q3TCJ1	Abraxas2	3	4	12270.2	18912.6	0.624194	1.81153	1.89913
Q9QYL7	Abt1	Activator of basal transcription 1	ABT1_MOUSE	30658.7	12	12	13	14	10	13	11	11440181	12138700	13892982	11467241	3.19347e+06	3.25007e+06	3.81626e+06	Q9QYL7	Abt1	30658.7		30658.7	Abt1	19755.2	22509.1	28035	20851.8	4155.55	4401.03	4590.69	Abt1	144.813	134.278	166.507	160.683	55.7145	55.6583	52.7111	Q9QYL7	Abt1	3	4	4382.42	22787.8	2.37846	4.94165	3.54164	up
Q921H8	Acaa1a	3-ketoacyl-CoA thiolase A, peroxisomal	THIKA_MOUSE	43953.3	19	20	20	19	20	21	20	48283100	54629028	50913988	44030328	34976452	39213904	47583680	Q921H8	Acaa1a	43953.3		43953.3	Acaa1a	58157.5	70659.6	71664.5	55846.9	31747	37039.4	39926.4	Acaa1a	426.318	421.521	425.634	430.352	425.64	468.425	458.442	Q921H8	Acaa1a	3	4	36237.6	64082.1	0.822434	2.72557	2.61868
Q8BWT1	Acaa2	3-ketoacyl-CoA thiolase, mitochondrial	THIM_MOUSE	41829.9	21	21	21	22	31	31	30	76334840	91486808	79215688	71995736	116182496	128934768	149219536	Q8BWT1	Acaa2	41829.9		41829.9	Acaa2	96613.7	124340	117161	95953.1	110809	127967	131563	Acaa2	708.217	741.753	695.851	739.408	1485.64	1618.36	1510.63	Q8BWT1	Acaa2	3	4	123446	108517	-0.185962	0.695861	0.916294
Q5SWU9;Q5SWU9-2	Acaca	Acetyl-CoA carboxylase 1;Isoform 2 of Acetyl-CoA carboxylase 1	ACACA_MOUSE	265256.59;265256.59-2	92	93	95	91	69	72	64	59009636	79427528	77958376	53755836	15180087	16209051	20201604	Q5SWU9	Acaca	265257		265257	Acaca	11777.7	17023.3	18182.6	11297.9	2283.11	2536.92	2808.75	Acaca	86.3349	101.553	107.991	87.0609	30.6102	32.0836	32.2506	Q5SWU9	Acaca	3	4	2542.93	14570.4	2.51847	4.00962	3.37558	up
Q8K370	Acad10	Acyl-CoA dehydrogenase family member 10	ACD10_MOUSE	118979	10	14	14	11	19	21	17	2599205	4.01476e+06	3.31835e+06	2.91798e+06	3.98065e+06	4402786	5776407	Q8K370	Acad10	118979		118979	Acad10	1156.57	1918.35	1725.48	1367.26	1334.76	1536.28	1790.53	Acad10	8.47811	11.4439	10.2481	10.536	17.8954	19.4289	20.5591	Q8K370	Acad10	3	4	1553.86	1541.91	-0.0111307	0.044767	0.334103
Q80XL6	Acad11	Acyl-CoA dehydrogenase family member 11	ACD11_MOUSE	87366.4	8	9	8	6	6	7	6	1.69439e+06	2462477	2.05625e+06	1.38043e+06	711043	624096	852639	Q80XL6	Acad11	87366.4		87366.4	Acad11	1026.77	1602.39	1456.1	880.861	324.691	296.567	359.927	Acad11	7.52661	9.55906	8.64814	6.78785	4.35322	3.75058	4.13275	Q80XL6	Acad11	3	4	327.062	1241.53	1.92448	3.17966	2.93257
Q9D7B6	Acad8	Isobutyryl-CoA dehydrogenase, mitochondrial	ACAD8_MOUSE	45019.8	5	5	4	0	0	2	0	1.11459e+06	1.57122e+06	759332	NaN	NaN	249362	NaN	Q9D7B6	Acad8	45019.8		45019.8	Acad8	1310.73	1984.14	1043.49			229.954		Acad8	9.60821	11.8364	6.19754			2.90815		Q9D7B6	Acad8	1	3	229.954	1446.12	2.65277	1.3883	1.53495
Q8JZN5	Acad9	Complex I assembly factor ACAD9, mitochondrial	ACAD9_MOUSE	68722.1	29	28	30	29	37	36	35	59542480	71969160	62947552	51515896	59479828	57558340	70395440	Q8JZN5	Acad9	68722.1		68722.1	Acad9	45870.4	59537.3	56668.4	41791	34529.7	34771.8	37778.2	Acad9	336.248	355.171	336.569	322.039	462.948	439.747	433.777	Q8JZN5	Acad9	3	4	35693.2	50966.8	0.513907	1.70259	1.80658
P51174	Acadl	Long-chain specific acyl-CoA dehydrogenase, mitochondrial	ACADL_MOUSE	47907.9	20	19	22	19	22	22	23	138800544	157432224	126134544	109144080	127692936	116716880	124026232	P51174	Acadl	47907.9		47907.9	Acadl	153386	186821	162886	127008	106336	101144	95477.2	Acadl	1124.38	1114.48	967.426	978.715	1425.67	1279.14	1096.29	P51174	Acadl	3	4	100986	157525	0.641433	2.16916	2.19109
P45952	Acadm	Medium-chain specific acyl-CoA dehydrogenase, mitochondrial	ACADM_MOUSE	46481.2	19	19	19	16	24	25	25	44454372	44734120	42822504	34452068	38725644	40749336	49058220	P45952	Acadm	46481.2		46481.2	Acadm	50633.7	54714.3	56997.1	41321.5	33238.4	36396.4	38924.9	Acadm	371.165	326.399	338.521	318.421	445.636	460.293	446.943	P45952	Acadm	3	4	36186.6	50916.6	0.492683	1.81811	1.90501
Q07417	Acads	Short-chain specific acyl-CoA dehydrogenase, mitochondrial	ACADS_MOUSE	44889.6	16	16	17	16	20	19	20	51783152	58460832	52472004	43320832	47427804	52979104	66677080	Q07417	Acads	44889.6		44889.6	Acads	61072.4	74038.7	72317	53800.9	42150.9	48997.5	54780.3	Acads	447.685	441.679	429.51	414.586	565.127	619.655	628.998	Q07417	Acads	3	4	48642.9	65307.2	0.425014	1.35296	1.50377
Q9DBL1	Acadsb	Short/branched chain specific acyl-CoA dehydrogenase, mitochondrial	ACDSB_MOUSE	47874.1	11	11	11	10	12	13	9	5054023	5300139	4829861	3.78833e+06	3.24246e+06	2.92596e+06	3.00279e+06	Q9DBL1	Acadsb	47874.1		47874.1	Acadsb	5589.06	6293.99	6241.55	4411.5	2702.05	2537.37	2313.23	Acadsb	40.9701	37.5469	37.0702	33.9947	36.2271	32.0892	26.5609	Q9DBL1	Acadsb	3	4	2517.55	5634.03	1.16215	3.20257	2.94435
P50544	Acadvl	Very long-chain specific acyl-CoA dehydrogenase, mitochondrial	ACADV_MOUSE	70875.5	32	34	38	37	39	41	38	59341704	63583160	55927184	46802628	43113524	45344952	49950584	P50544	Acadvl	70875.5		70875.5	Acadvl	44326.8	51001.8	48818.6	36814	24268.1	26561.2	25991.9	Acadvl	324.933	304.252	289.947	283.686	325.369	335.911	298.444	P50544	Acadvl	3	4	25607.1	45240.3	0.821064	2.8434	2.70378
Q8K2H4	Acap1	Arf-GAP with coiled-coil, ANK repeat and PH domain-containing protein 1	ACAP1_MOUSE	81704.1	34	35	40	36	48	48	47	54370188	64331152	55632424	51229156	57776172	58241116	76908384	Q8K2H4	Acap1	81704.1		81704.1	Acap1	35230.6	44762.8	42125.3	34955.2	28211.4	29593.8	34715.5	Acap1	258.254	267.033	250.193	269.363	378.237	374.263	398.61	Q8K2H4	Acap1	3	4	30840.2	39268.5	0.348557	1.33543	1.4886
Q6ZQK5	Acap2	Arf-GAP with coiled-coil, ANK repeat and PH domain-containing protein 2	ACAP2_MOUSE	87210.8	29	30	33	28	34	38	36	17556622	26020938	24409144	18149810	14934325	19031656	18936030	Q6ZQK5	Acap2	87210.8		87210.8	Acap2	10657.9	16962.6	17315.7	11602.2	6831.79	9059.86	8007.79	Acap2	78.1269	101.191	102.843	89.4058	91.5955	114.577	91.9469	Q6ZQK5	Acap2	3	4	7966.48	14134.6	0.827218	1.71062	1.81316
Q8QZT1	Acat1	Acetyl-CoA acetyltransferase, mitochondrial	THIL_MOUSE	44816.1	23	20	21	20	28	27	27	123608504	133725424	112655120	100660888	117820632	128427352	150384448	Q8QZT1	Acat1	44816.1		44816.1	Acat1	146021	169636	155516	125217	104883	118970	123755	Acat1	1070.39	1011.97	923.651	964.918	1406.2	1504.58	1420.98	Q8QZT1	Acat1	3	4	115869	149098	0.363758	1.4578	1.59617
Q8CAY6	Acat2	Acetyl-CoA acetyltransferase, cytosolic	THIC_MOUSE	41297.7	15	16	16	15	19	18	18	27413418	41476588	42018548	30703658	15947358	18380234	24754972	Q8CAY6	Acat2	41297.7		41297.7	Acat2	35143	57097.4	62946.7	41447.9	15405.7	18477.4	22107	Acat2	257.612	340.615	373.858	319.395	206.548	233.677	253.837	Q8CAY6	Acat2	3	4	18663.4	49158.8	1.39724	2.45928	2.42
Q8BMP6	Acbd3	Golgi resident protein GCP60	GCP60_MOUSE	60180.8	16	16	17	17	19	19	20	21985776	24832070	23534856	22273004	11197178	11525709	14259867	Q8BMP6	Acbd3	60180.8		60180.8	Acbd3	19341.3	23458.2	24194.2	20632.9	7422.84	7951.06	8738.79	Acbd3	141.78	139.94	143.696	158.995	99.5198	100.554	100.34	Q8BMP6	Acbd3	3	4	8037.56	21906.7	1.44654	4.40065	3.49685
Q5XG73;Q5XG73-2;Q5XG73-3	Acbd5	Acyl-CoA-binding domain-containing protein 5;Isoform 2 of Acyl-CoA-binding domain-containing protein 5;Isoform 3 of Acyl-CoA-binding domain-containing protein 5	ACBD5_MOUSE	56613.73;56613.73-2;56613.73-3	6	7	7	7	4	6	5	873794	1.15625e+06	1.04425e+06	844002	492889	678830	710809	Q5XG73	Acbd5	56613.7		56613.7	Acbd5	817.127	1161.1	1141.15	831.114	347.333	497.8	463.047	Acbd5	5.98986	6.92655	6.77758	6.40451	4.65678	6.29551	5.31679	Q5XG73	Acbd5	3	4	436.06	987.622	1.17943	2.58608	2.516
Q9D061	Acbd6	Acyl-CoA-binding domain-containing protein 6	ACBD6_MOUSE	30887.5	10	12	11	9	4	3	2	3.17352e+06	4957302	3.60296e+06	3.32637e+06	621789	465319	243318	Q9D061	Acbd6	30887.5		30887.5	Acbd6	5439.52	9124.35	7216.63	6003.81	803.118	625.437	290.527	Acbd6	39.8739	54.4315	42.8615	46.265	10.7676	7.90969	3.33588	Q9D061	Acbd6	3	4	573.027	6946.08	3.59952	3.51462	3.12878	up
A2AIG8;A2AIG8-2	Accs	1A11-aminocyclopropane-1-carboxylate synthase-like protein 1;1A1Isoform 2 of 1-aminocyclopropane-1-carboxylate synthase-like protein 1	1A1L1_MO	56878.83;56878.83-2	2	0	2	0	4	4	4	163476	NaN	1.02491e+06	NaN	1.62893e+06	1.28956e+06	2.23997e+06	A2AIG8	Accs	56878.8		56878.8	Accs	152.161		1114.79		1142.54	941.251	1452.4	Accs	1.1154		6.62106		15.3183	11.9037	16.6767	A2AIG8	Accs	3	2	1178.73	633.478	-0.895866	0.575033	0.807315
Q5EE38	Acd	Adrenocortical dysplasia protein	ACD_MOUSE	44713.1	7	9	9	9	10	10	10	6307910	7.31794e+06	8786933	6672301	6.27033e+06	6263785	6784232	Q5EE38	Acd	44713.1		44713.1	Acd	7468.84	9304.51	12158	8319.16	5594.68	5815.91	5595.77	Acd	54.7496	55.5062	72.2094	64.1069	75.0092	73.5518	64.2517	Q5EE38	Acd	3	4	5668.79	9312.62	0.716148	1.92522	1.99554
Q9JIX8;Q9JIX8-4	Acin1	Apoptotic chromatin condensation inducer in the nucleus;Isoform 4 of Apoptotic chromatin condensation inducer in the nucleus	ACINU_MOUSE	150718.97;150718.97-4	60	58	60	60	65	63	64	168837088	192905184	172729872	158194384	135548784	144665616	173848512	Q9JIX8	Acin1	150719		150719	Acin1	59306.5	72763.8	70901.9	58514.2	35879.5	39848.6	42539.9	Acin1	434.74	434.073	421.105	450.907	481.046	503.951	488.451	Q9JIX8	Acin1	3	4	39422.7	65371.6	0.729639	2.83256	2.69591
Q91V92	Acly	ATP-citrate synthase	ACLY_MOUSE	119728	62	62	62	63	66	62	66	362684224	464760832	448772736	400030944	189851312	185282000	269561536	Q91V92	Acly	119728		119728	Acly	160374	220685	231894	186267	63261.1	64247	83034	Acly	1175.61	1316.5	1377.28	1435.36	848.158	812.51	953.412	Q91V92	Acly	3	4	70180.7	199805	1.50945	3.41321	3.07316
P28271	Aco1	Cytoplasmic aconitate hydratase	ACOHC_MOUSE	98125.6	32	30	34	32	36	39	35	32740690	40301368	39431280	30535782	37592256	36003676	43897128	P28271	Aco1	98125.6		98125.6	Aco1	17664.8	23349.5	24860.9	17348.6	15283.9	15232.8	16498.6	Aco1	129.49	139.292	147.656	133.687	204.915	192.644	189.44	P28271	Aco1	3	4	15671.8	20805.9	0.408826	1.21691	1.3831
Q99KI0	Aco2	Aconitate hydratase, mitochondrial	ACON_MOUSE	85463.5	43	41	43	42	54	56	55	473226080	548717952	459439104	413542304	391793664	386606944	443051616	Q99KI0	Aco2	85463.5		85463.5	Aco2	293150	365013	332587	269760	182892	187804	191191	Aco2	2148.91	2177.49	1975.32	2078.75	2452.08	2375.09	2195.29	Q99KI0	Aco2	3	4	187296	315128	0.750618	2.86932	2.72171
Q8VHQ9	Acot11	Acyl-coenzyme A thioesterase 11	ACO11_MOUSE	67354.6	2	1	0	0	4	5	2	339640	218247	NaN	NaN	512966	864662	393231	Q8VHQ9	Acot11	67354.6		67354.6	Acot11	266.965	184.213			303.837	532.959	215.315	Acot11	1.95696	1.09893			4.07361	6.74016	2.47228	Q8VHQ9	Acot11	3	2	350.704	225.589	-0.636557	0.432114	0.678055
Q9CQR4	Acot13	Acyl-coenzyme A thioesterase 13	ACO13_MOUSE	15182.8	4	5	4	4	7	6	7	8446060	10702950	9755562	7.0424e+06	8716278	9635303	12479238	Q9CQR4	Acot13	15182.8		15182.8	Acot13	29451.2	40076.5	39751.9	25858.7	22903.3	26346.8	30313	Acot13	215.889	239.077	236.097	199.265	307.07	333.199	348.06	Q9CQR4	Acot13	3	4	26521	33784.6	0.349229	0.754565	0.968035
Q9QYR9	Acot2	Acyl-coenzyme A thioesterase 2, mitochondrial	ACOT2_MOUSE	49657	19	17	18	18	21	20	20	56431888	61586784	51434860	49289676	67408048	66231160	83829520	Q9QYR9	Acot2	49657		49657	Acot2	60165.3	70509.3	64081.9	55336.8	54156.4	55372.8	62260.1	Acot2	441.036	420.624	380.599	426.421	726.089	700.282	714.882	Q9QYR9	Acot2	3	4	57263.1	62523.3	0.126787	0.556433	0.791022
Q91V12-2	Acot7	Isoform A of Cytosolic acyl coenzyme A thioester hydrolase	BACH_MOUSE	37555	14	13	14	13	10	11	10	21753828	25724410	26039048	18444562	4.06168e+06	3842904	5.57712e+06	Q91V12	Acot7	37555		37555	Acot7	30666.9	38941.9	42895.9	27380.4	4314.77	4248.22	5476.91	Acot7	224.801	232.309	254.77	210.991	57.8491	53.7259	62.8869	Q91V12	Acot7	3	4	4679.97	34971.3	2.9016	4.5088	3.50698	up
P58137	Acot8	Acyl-coenzyme A thioesterase 8	ACOT8_MOUSE	35827.1	11	14	13	12	9	11	11	5985050	7543636	6.34949e+06	5047089	2.66524e+06	2714370	3.97767e+06	P58137	Acot8	35827.1		35827.1	Acot8	8844.2	11970.4	10964.4	7853.58	2967.86	3145.38	4094.59	Acot8	64.8315	71.4096	65.1207	60.5192	39.7908	39.7785	47.0149	P58137	Acot8	3	4	3402.61	9908.15	1.54197	3.1872	2.93629
Q9R0X4	Acot9	Acyl-coenzyme A thioesterase 9, mitochondrial	ACOT9_MOUSE	50560.5	24	24	25	23	24	25	25	34944944	41651064	35132472	30363046	37655384	42886632	81397168	Q9R0X4	Acot9	50560.5		50560.5	Acot9	36591.1	46833.3	42988.9	33479	29712.2	35214.9	59373.4	Acot9	268.227	279.384	255.322	257.987	398.359	445.351	681.736	Q9R0X4	Acot9	3	4	41433.5	39973.1	-0.0517694	0.00102165	0.296338
Q9R0H0;Q9R0H0-2	Acox1	Peroxisomal acyl-coenzyme A oxidase 1;Isoform 2 of Peroxisomal acyl-coenzyme A oxidase 1	ACOX1_MOUSE	74648.72;74648.72-2	17	15	12	14	7	10	7	2.7988e+06	2.84286e+06	2.0388e+06	2.0974e+06	462506	791477	726160	Q9R0H0	Acox1	74648.7		74648.7	Acox1	1984.96	2165.07	1689.71	1566.38	247.18	440.181	358.759	Acox1	14.5505	12.9158	10.0356	12.0704	3.31401	5.56682	4.11934	Q9R0H0	Acox1	3	4	348.707	1851.53	2.40863	3.80141	3.28172	up
Q9EPL9	Acox3	Peroxisomal acyl-coenzyme A oxidase 3	ACOX3_MOUSE	78403.7	24	26	26	26	29	27	26	13520821	16563173	14635586	13781293	16120120	15231231	19972494	Q9EPL9	Acox3	78403.7		78403.7	Acox3	9129.95	12010.1	11548.7	9799.22	8202.58	8065.17	9394.84	Acox3	66.9262	71.6464	68.5906	75.5122	109.974	101.997	107.873	Q9EPL9	Acox3	3	4	8554.2	10622	0.312349	1.22849	1.39336
Q9D358	Acp1	Low molecular weight phosphotyrosine protein phosphatase	PPAC_MOUSE	18191.7	7	7	7	7	7	7	7	29784738	37661224	28416454	22064676	14337650	14107335	20227762	Q9D358	Acp1	18191.7		18191.7	Acp1	86680.7	117696	96639.5	67618	31443	32194.9	41007.9	Acp1	635.404	702.115	573.968	521.06	421.564	407.158	470.861	Q9D358	Acp1	3	4	34881.9	92158.5	1.40164	2.80629	2.67775
Q9D358-2	Acp1	Isoform 2 of Low molecular weight phosphotyrosine protein phosphatase	PPAC_MOUSE	17941.4	1	0	1	0	1	1	1	509483	NaN	297322	NaN	477645	508115	514587	Q9D358	Acp1	17941.4		17941.4	Acp1	1503.4		1025.25		1062.1	1175.77	1057.78	Acp1	11.0205		6.08923		14.2399	14.8695	12.1456	Q9D358	Acp1	3	2	1098.55	1264.33	0.202768	0.328724	0.585265
Q05117	Acp5	Tartrate-resistant acid phosphatase type 5	PPA5_MOUSE	36807.1	0	1	0	0	2	2	2	NaN	243481	NaN	NaN	455605	533634	650992	Q05117	Acp5	36807.1		36807.1	Acp5		376.074			493.828	601.903	652.285	Acp5		2.24348			6.62087	7.61207	7.48966	Q05117	Acp5	3	1	582.672	376.074	-0.631667	0.917184	1.11445
Q8BP40	Acp6	Lysophosphatidic acid phosphatase type 6	PPA6_MOUSE	47624.9	14	13	15	16	18	18	17	8772511	9778047	9336515	9175579	12701561	12021706	13785655	Q8BP40	Acp6	47624.9		47624.9	Acp6	9751.96	11672.3	12128.5	10740.8	10640	10479.7	10675.5	Acp6	71.4857	69.6314	72.0347	82.7681	142.653	132.533	122.578	Q8BP40	Acp6	3	4	10598.4	11073.4	0.0632568	0.289726	0.549568
Q8VCW8	Acsf2	Medium-chain acyl-CoA ligase ACSF2, mitochondrial	ACSF2_MOUSE	67950.6	28	29	32	29	39	39	40	196770048	222711200	198156256	172575712	264688880	256489424	305403648	Q8VCW8	Acsf2	67950.6		67950.6	Acsf2	153309	186332	180415	141588	155404	156708	165758	Acsf2	1123.82	1111.57	1071.53	1091.06	2083.54	1981.84	1903.27	Q8VCW8	Acsf2	3	4	159290	165411	0.0543998	0.151319	0.426833
Q3URE1	Acsf3	Malonate--CoA ligase ACSF3, mitochondrial	ACSF3_MOUSE	65076.7	13	12	12	12	17	16	16	4228349	4244490	4.32804e+06	2.98133e+06	4533076	4.94302e+06	5.75022e+06	Q3URE1	Acsf3	65076.7		65076.7	Acsf3	3439.91	3708	4114.57	2554.01	2778.99	3153.42	3258.76	Acsf3	25.2159	22.1201	24.4375	19.681	37.2586	39.8803	37.4177	Q3URE1	Acsf3	3	4	3063.72	3454.12	0.173033	0.356758	0.610373
P41216	Acsl1	Long-chain-fatty-acid--CoA ligase 1	ACSL1_MOUSE	77951.5	20	21	20	20	21	22	19	9341620	12105378	10674449	8938051	7.83438e+06	10085386	10995670	P41216	Acsl1	77951.5		77951.5	Acsl1	6344.54	8828.63	8471.87	6392.3	4009.58	5371.35	5202.25	Acsl1	46.508	52.6673	50.3167	49.2586	53.7575	67.9296	59.7332	P41216	Acsl1	3	4	4861.06	7509.33	0.627414	1.67082	1.77977
Q9CZW4	Acsl3	Fatty acid CoA ligase Acsl3	ACSL3_MOUSE	80492.4	22	26	24	23	19	21	22	12312058	16319539	16612708	13014184	4.31369e+06	4.33539e+06	7616099	Q9CZW4	Acsl3	80492.4		80492.4	Acsl3	8098.01	11526.4	12768.6	9013.65	2138.03	2236.09	3489.57	Acsl3	59.3616	68.7607	75.8363	69.4586	28.6651	28.2791	40.0679	Q9CZW4	Acsl3	3	4	2621.23	10351.7	1.98155	3.21377	2.95163
Q9QUJ7;Q9QUJ7-2	Acsl4	Long-chain-fatty-acid--CoA ligase 4;Isoform Short of Long-chain-fatty-acid--CoA ligase 4	ACSL4_MOUSE	79076.96;79076.96-2	30	33	33	33	26	28	27	34077512	48987720	45447164	35911160	8525138	8420423	13561810	Q9QUJ7	Acsl4	79077		79077	Acsl4	22815	35219	35556.2	25317.3	4301.01	4420.78	6325.01	Acsl4	167.243	210.099	211.178	195.094	57.6647	55.9082	72.625	Q9QUJ7	Acsl4	3	4	5015.6	29726.9	2.56727	3.85865	3.31661	up
Q8JZR0	Acsl5	Long-chain-fatty-acid--CoA ligase 5	ACSL5_MOUSE	76206.4	27	27	26	25	29	30	29	32400508	37898532	34009784	28532440	20569458	20901048	26145228	Q8JZR0	Acsl5	76206.4		76206.4	Acsl5	22509.3	28272.9	27610.3	20873.1	10768.4	11386.5	12653	Acsl5	165.002	168.662	163.985	160.846	144.374	144.002	145.285	Q8JZR0	Acsl5	3	4	11602.7	24816.4	1.09684	3.24491	2.97169
Q8BGA8;Q8BGA8-2	Acsm5	Acyl-coenzyme A synthetase ACSM5, mitochondrial;Isoform 2 of Acyl-coenzyme A synthetase ACSM5, mitochondrial	ACSM5_MOUSE	64328.47;64328.47-2	0	0	1	1	0	1	0	NaN	NaN	610536	484498	NaN	283420	NaN	Q8BGA8	Acsm5	64328.5		64328.5	Acsm5			587.173	419.882		182.912		Acsm5			3.48738	3.23558		2.31323		Q8BGA8	Acsm5	1	2	182.912	503.528	1.46092	0.744321	0.959376
Q99NB1	Acss1	Acetyl-coenzyme A synthetase 2-like, mitochondrial	ACS2L_MOUSE	74623.3	26	26	25	24	30	30	29	28417110	35252624	26281106	22682152	37691700	38736544	48823588	Q99NB1	Acss1	74623.3		74623.3	Acss1	20160.8	26856.9	21788.5	16945.3	20150.7	21550.7	24129.5	Acss1	147.787	160.215	129.408	130.579	270.165	272.545	277.06	Q99NB1	Acss1	3	4	21943.6	21437.9	-0.0336418	0.103121	0.385019
Q9QXG4	Acss2	Acetyl-coenzyme A synthetase, cytoplasmic	ACSA_MOUSE	78862	12	11	12	11	14	13	15	3.099e+06	3883277	4.03976e+06	3.12111e+06	4475269	3.91874e+06	6478701	Q9QXG4	Acss2	78862		78862	Acss2	2080.45	2799.43	3169.17	2206.38	2263.97	2062.97	3029.8	Acss2	15.2505	16.7001	18.8225	17.0022	30.3536	26.0897	34.7887	Q9QXG4	Acss2	3	4	2452.25	2563.86	0.0642116	0.104225	0.385998
P68134	Acta1	Actin, alpha skeletal muscle	ACTS_MOUSE	42051	2	2	2	2	2	2	2	41369524	47209912	44018260	44455000	49663092	46539500	58735152	P68134	Acta1	42051		42051	Acta1	52084.2	63825.8	64761.1	58936.2	47116.8	45947.3	51512.8	Acta1	381.798	380.753	384.634	454.159	631.707	581.08	591.48	P68134	Acta1	3	4	48192.3	59901.8	0.313797	1.6532	1.76466
P62737	Acta2	Actin, aortic smooth muscle	ACTA_MOUSE	42008.9	9	8	6	4	10	11	11	1292193408	1573065472	1447096064	1303320832	1070994304	1090434304	1103976704	P62737	Acta2	42008.9		42008.9	Acta2	1.6285e+06	2.12885e+06	2.13115e+06	1.72961e+06	1.0171e+06	1.07764e+06	969196	Acta2	11937.6	12699.7	12657.5	13328.3	13636.5	13628.5	11128.5	P62737	Acta2	3	4	1.02131e+06	1.90453e+06	0.899009	3.07276	2.86168
P60710	Actb	Actin, cytoplasmic 1	ACTB_MOUSE	41736.7	36	35	35	34	44	43	44	25445447680	26431002624	27381952512	26138703872	28238825472	27895615488	33653983232	P60710	Actb	41736.7		41736.7	Actb	3.22771e+07	3.60027e+07	4.05886e+07	3.49144e+07	2.69928e+07	2.77481e+07	2.9738e+07	Actb	236604	214774	241067	269048	361899	350920	341457	P60710	Actb	3	4	2.81596e+07	3.59457e+07	0.352191	1.96238	2.02655
Q8BFZ3	Actbl2	Beta-actin-like protein 2	ACTBL_MOUSE	42004.2	3	4	4	4	4	4	4	49522556	94114656	134932208	90964496	67954536	19289464	66869392	Q8BFZ3	Actbl2	42004.2		42004.2	Actbl2	62418.4	127381	198738	120731	64542.4	19065.3	58712.2	Actbl2	457.552	759.892	1180.36	930.343	865.335	241.112	674.145	Q8BFZ3	Actbl2	3	4	47439.9	127317	1.42425	1.20922	1.37597
P63260	Actg1	Actin, cytoplasmic 2	ACTG_MOUSE	41792.8	3	3	3	3	3	3	3	337105824	337935840	341092032	355365280	342359392	299677696	355617120	P63260	Actg1	41792.8		41792.8	Actg1	427038	459697	504926	474036	326813	297692	313816	Actg1	3130.36	2742.33	2998.89	3652.89	4381.66	3764.82	3603.29	P63260	Actg1	3	4	312774	466424	0.576524	3.42726	3.08083
P63268	Actg2	Actin, gamma-enteric smooth muscle	ACTH_MOUSE	41876.9	1	1	0	0	0	0	0	1970784	1.78189e+06	NaN	NaN	NaN	NaN	NaN	P63268	Actg2	41876.9		41876.9	Actg2	2491.54	2419.06						Actg2	18.2639	14.4309						P63268	Actg2		2		2455.3
Q9Z2N8	Actl6a	Actin-like protein 6A	ACL6A_MOUSE	47448	18	17	16	16	21	22	21	93903896	104941992	92709376	81635152	84161352	82758608	122698128	Q9Z2N8	Actl6a	47448		47448	Actl6a	104778	125739	120883	95917.6	70764.3	72412.1	95370.5	Actl6a	768.061	750.1	717.955	739.134	948.754	915.771	1095.06	Q9Z2N8	Actl6a	3	4	79515.6	111829	0.491988	1.59528	1.71481
Q99MR0	Actl6b	Actin-like protein 6B	ACL6B_MOUSE	46891.5	5	4	4	4	6	6	5	11741212	13671249	12822252	9922968	7.88585e+06	7005742	8679732	Q99MR0	Actl6b	46891.5		46891.5	Actl6b	13256.3	16575	16917.2	11797.4	6709.25	6202.62	6826.63	Actl6b	97.1737	98.8784	100.476	90.9099	89.9525	78.4425	78.3846	Q99MR0	Actl6b	3	4	6579.5	14636.5	1.15352	3.1493	2.91234
Q7TPR4	Actn1	Alpha-actinin-1	ACTN1_MOUSE	103068	14	19	14	11	15	18	19	2.34978e+06	5300320	2.86693e+06	1.69816e+06	2.07851e+06	3.60513e+06	5.11725e+06	Q7TPR4	Actn1	103068		103068	Actn1	1206.99	2923.58	1720.87	918.523	804.535	1452.14	1831.07	Actn1	8.84771	17.4407	10.2207	7.07808	10.7866	18.3648	21.0247	Q7TPR4	Actn1	3	4	1362.58	1692.49	0.312807	0.19045	0.461396
O88990	Actn3	Alpha-actinin-3	ACTN3_MOUSE	103043	3	5	0	2	2	4	3	583351	839166	NaN	406125	49504.1	243507	184959	O88990	Actn3	103043		103043	Actn3	299.72	462.988		219.726	19.1665	98.1091	66.1991	Actn3	2.19706	2.76196		1.69319	0.25697	1.24075	0.76011	O88990	Actn3	3	3	61.1582	327.478	2.42078	1.56902	1.69307
P57780	Actn4	Alpha-actinin-4	ACTN4_MOUSE	104977	64	64	67	64	77	76	77	380039296	488484512	447939200	370779328	348162720	331328960	458000000	P57780	Actn4	104977		104977	Actn4	191662	264543	263987	196906	132314	131033	160903	Actn4	1404.96	1578.13	1567.89	1517.35	1773.97	1657.13	1847.52	P57780	Actn4	3	4	141417	229275	0.697123	1.98228	2.04314
Q9QZB7	Actr10	Actin-related protein 10	ARP10_MOUSE	46207.9	19	22	21	20	24	24	24	15473042	18528820	12617703	12422811	12951749	12060100	15502154	Q9QZB7	Actr10	46207.9		46207.9	Actr10	17728.1	22796.6	16893.6	14987.9	11182.3	10835.5	12372.8	Actr10	129.954	135.994	100.336	115.496	149.924	137.033	142.067	Q9QZB7	Actr10	3	4	11463.6	18101.6	0.65906	2.01686	2.06911
P61164	Actr1a	Alpha-centractin	ACTZ_MOUSE	42613.7	21	18	21	19	23	24	23	55069940	57071440	56773056	46211296	49942172	47970232	63280764	P61164	Actr1a	42613.7		42613.7	Actr1a	68417.5	76139.2	82423.5	60455.7	46755.9	46734.5	54766.6	Actr1a	501.527	454.21	489.535	465.867	626.868	591.035	628.84	P61164	Actr1a	3	4	49419	71859	0.540102	2.0169	2.06911
Q8R5C5	Actr1b	Beta-centractin	ACTY_MOUSE	42281.3	6	7	7	7	6	6	6	6190297	7.88084e+06	7.12436e+06	6.62178e+06	4592361	4.56842e+06	6489729	Q8R5C5	Actr1b	42281.3		42281.3	Actr1b	7751.13	10596.5	10424.5	8731.01	4333.18	4485.72	5660.72	Actr1b	56.8188	63.2136	61.9139	67.2806	58.0959	56.7294	64.9974	Q8R5C5	Actr1b	3	4	4826.54	9375.79	0.957951	2.68985	2.59294
P61161	Actr2	Actin-related protein 2	ARP2_MOUSE	44760.8	20	20	20	20	24	23	25	460008384	522446112	497971840	418185056	371954432	394248160	487524288	P61161	Actr2	44760.8		44760.8	Actr2	544090	663565	688280	520846	331521	365668	401691	Actr2	3988.39	3958.5	4087.88	4013.6	4444.79	4624.48	4612.29	P61161	Actr2	3	4	366294	604195	0.722015	2.47289	2.43111
Q99JY9	Actr3	Actin-related protein 3	ARP3_MOUSE	47357.2	20	22	21	20	27	26	28	654032704	704552128	700277440	601133120	652264832	620667648	762593216	Q99JY9	Actr3	47357.2		47357.2	Actr3	731166	845799	914835	707658	549487	544113	593883	Actr3	5359.74	5045.62	5433.45	5453.17	7367.11	6881.21	6819.08	Q99JY9	Actr3	3	4	562494	799865	0.507917	2.23659	2.24407
Q641P0	Actr3b	Actin-related protein 3B	ARP3B_MOUSE	47579.7	7	7	8	9	7	7	8	124830400	272883200	190242624	114841104	148239184	121869784	304402080	Q641P0	Actr3b	47579.7		47579.7	Actr3b	138900	326058	247369	134559	124297	106338	235950	Actr3b	1018.19	1945.1	1469.19	1036.91	1666.48	1344.82	2709.22	Q641P0	Actr3b	3	4	155528	211721	0.444989	0.392061	0.641856
Q80US4	Actr5	Actin-related protein 5	ARP5_MOUSE	67844.8	16	16	16	16	20	20	18	6375316	7.66011e+06	6.69683e+06	6.36803e+06	5753089	6.53844e+06	8.3513e+06	Q80US4	Actr5	67844.8		67844.8	Actr5	4974.94	6418.86	6106.76	5232.71	3383.01	4001.04	4539.75	Actr5	36.4683	38.2918	36.2697	40.3229	45.3569	50.5998	52.1262	Q80US4	Actr5	3	4	3974.6	5683.32	0.515924	1.78411	1.87655
Q9D864	Actr6	Actin-related protein 6	ARP6_MOUSE	45785	9	9	10	10	9	8	8	2281989	2.61843e+06	2.59716e+06	2.38363e+06	1.56964e+06	1.57266e+06	1.83934e+06	Q9D864	Actr6	45785		45785	Actr6	2638.71	3251.3	3509.4	2902.38	1367.72	1426.02	1481.61	Actr6	19.3428	19.3957	20.8433	22.3655	18.3373	18.0344	17.0121	Q9D864	Actr6	3	4	1425.11	3075.45	1.10972	3.75932	3.2664
Q8R2S9	Actr8	Actin-related protein 8	ARP8_MOUSE	70545.7	16	15	14	15	18	20	13	39692320	33379360	35305648	32133436	78663432	80644520	98832728	Q8R2S9	Actr8	70545.7		70545.7	Actr8	29787.8	26899.6	30962.2	25393.6	44485.8	47459.1	51668.2	Actr8	218.356	160.47	183.893	195.682	596.432	600.199	593.264	Q8R2S9	Actr8	3	4	47871	28260.8	-0.76035	3.33933	3.02568	down
Q99JW2	Acy1	Aminoacylase-1	ACY1_MOUSE	45781	18	19	19	18	20	21	20	20522148	26106514	27013366	19397724	11127035	13419069	16757098	Q99JW2	Acy1	45781		45781	Acy1	23732.3	32419.3	36505	23621.3	9696.47	12168.9	13499.2	Acy1	173.967	193.398	216.813	182.024	130.003	153.896	155	Q99JW2	Acy1	3	4	11788.2	29069.5	1.30216	2.66582	2.57501
P56376	Acyp1	Acylphosphatase-1	ACYP1_MOUSE	11240.7	8	7	7	7	8	8	7	19866808	24058500	20212736	17300700	29530806	36239588	42301796	P56376	Acyp1	11240.7		11240.7	Acyp1	93569.9	121678	111247	85804.1	104809	133846	138790	Acyp1	685.905	725.875	660.727	661.201	1405.21	1692.7	1593.61	P56376	Acyp1	3	4	125815	103075	-0.287611	0.814602	1.02245
P56375	Acyp2	Acylphosphatase-2	ACYP2_MOUSE	11877.6	1	0	1	1	1	1	1	126614	NaN	148460	115818	57137.5	85225.8	85865.2	P56375	Acyp2	11877.6		11877.6	Acyp2	564.361		773.284	543.607	191.916	297.891	266.613	Acyp2	4.13699		4.59274	4.189	2.57307	3.76733	3.0613	P56375	Acyp2	3	3	252.14	627.084	1.31443	2.21269	2.22631
P03958	Ada	Adenosine deaminase	ADA_MOUSE	39991.6	16	18	18	15	18	18	19	8771370	12287186	11416549	8.38713e+06	9295481	9353569	12391051	P03958	Ada	39991.6		39991.6	Ada	11611.8	17467.2	17661.4	11691.8	9273.03	9710.09	11427	Ada	85.1193	104.201	104.895	90.0965	124.326	122.8	131.207	P03958	Ada	3	4	10136.7	14608	0.527174	1.17006	1.34062
Q80SY6	Adal	Adenosine deaminase-like protein	ADAL_MOUSE	41000.8	2	0	0	0	3	3	2	219064	NaN	NaN	NaN	203179	274265	256324	Q80SY6	Adal	41000.8		41000.8	Adal	282.866				197.7	277.711	230.563	Adal	2.07352				2.65061	3.51211	2.64737	Q80SY6	Adal	3	1	235.325	282.866	0.265469	0.368368	0.620646
O35598	Adam10	Disintegrin and metalloproteinase domain-containing protein 10	ADA10_MOUSE	83968.1	25	27	26	27	17	17	17	12836409	17595288	15113790	12373736	6.09581e+06	5926483	6314544	O35598	Adam10	83968.1		83968.1	Adam10	8093.41	11913	11135.7	8215.33	2896.25	2930.2	2773.46	Adam10	59.3279	71.0672	66.1379	63.3068	38.8308	37.0573	31.8453	O35598	Adam10	3	4	2866.64	9839.36	1.77921	3.79946	3.28107
Q9Z0F8	Adam17	Disintegrin and metalloproteinase domain-containing protein 17	ADA17_MOUSE	93056.1	16	14	17	16	17	20	17	4850236	4500212	4.59953e+06	3.76165e+06	3.1348e+06	3425442	3438752	Q9Z0F8	Adam17	93056.1		93056.1	Adam17	2759.43	2749.33	3057.92	2253.58	1343.95	1528.22	1362.85	Adam17	20.2277	16.4012	18.1618	17.3659	18.0187	19.3269	15.6485	Q9Z0F8	Adam17	3	4	1411.68	2705.07	0.938254	3.25521	2.97634
Q61072	Adam9	Disintegrin and metalloproteinase domain-containing protein 9	ADAM9_MOUSE	92079.4	10	9	11	10	6	5	5	2.68683e+06	2.64748e+06	2752068	2.32604e+06	703770	350058	909572	Q61072	Adam9	92079.4		92079.4	Adam9	1544.83	1634.59	1849.08	1408.29	304.921	157.831	364.307	Adam9	11.3242	9.75118	10.9822	10.8522	4.08815	1.99604	4.18305	Q61072	Adam9	3	4	275.686	1609.2	2.54524	3.34417	3.0288	up
E9PY16	Adap1	E9ArfGAP with dual PH domains 1	E9PY16_MOU	43370.3	11	9	10	8	11	12	12	2.60028e+06	2647886	2470009	1.91412e+06	2551357	3.32565e+06	4872322	E9PY16	Adap1	43370.3		43370.3	Adap1	3174.17	3470.93	3523.42	2460.45	2346.92	3183.46	4143.21	Adap1	23.2679	20.7059	20.9265	18.9601	31.4657	40.2602	47.5731	E9PY16	Adap1	3	4	3224.53	3157.24	-0.0304236	0.0086117	0.30314
Q99MU3-2	Adar	Isoform 2 of Double-stranded RNA-specific adenosine deaminase	DSRAD_MOUSE	127660	49	50	50	50	50	51	44	51677236	63505200	47928288	41916392	15127094	17124300	18739378	Q99MU3	Adar	127660		127660	Adar	21431.2	28281	23227.1	18304.9	4727.37	5568.95	5413.7	Adar	157.099	168.71	137.952	141.056	63.3811	70.4287	62.1611	Q99MU3	Adar	3	4	5236.68	22811.1	2.12301	4.2688	3.46932
Q99MU3	Adar	Double-stranded RNA-specific adenosine deaminase	DSRAD_MOUSE	130447	2	2	2	2	0	0	0	747044	877691	770340	604734	NaN	NaN	NaN	Q99MU3	Adar	130447		130447	Adar	303.189	382.513	365.347	258.445				Adar	2.2225	2.28189	2.1699	1.99156				Q99MU3	Adar		4		327.374				up-a
Q9JHI2	Adat1	tRNA-specific adenosine deaminase 1	ADAT1_MOUSE	55355	7	5	5	3	7	9	7	1.26317e+06	1.0062e+06	1.43532e+06	701417	923055	1.11375e+06	1.19708e+06	Q9JHI2	Adat1	55355		55355	Adat1	1208.12	1033.4	1604.17	706.412	665.257	835.306	797.552	Adat1	8.85596	6.16476	9.5276	5.44356	8.91927	10.5638	9.15764	Q9JHI2	Adat1	3	4	766.039	1138.02	0.571043	0.824604	1.03164
Q6P6J0	Adat2	tRNA-specific adenosine deaminase 2	ADAT2_MOUSE	21308.5	5	6	5	5	4	4	4	1.38031e+06	2.02064e+06	1.73153e+06	1.45617e+06	586850	515881	618491	Q6P6J0	Adat2	21308.5		21308.5	Adat2	3429.47	5391.1	5027.32	3809.77	1098.74	1005.11	1070.47	Adat2	25.1393	32.1607	29.8586	29.3578	14.7311	12.7113	12.2913	Q6P6J0	Adat2	3	4	1058.11	4414.41	2.06074	3.93629	3.3444
Q6PAT0	Adat3	Probable inactive tRNA-specific adenosine deaminase-like protein 3	ADAT3_MOUSE	37516.7	9	8	10	7	8	8	9	2570864	2.94848e+06	2903292	1.62873e+06	1.37816e+06	1.3479e+06	1.48825e+06	Q6PAT0	Adat3	37516.7		37516.7	Adat3	3627.91	4468	4787.67	2420.27	1465.53	1491.59	1463.01	Adat3	26.594	26.6539	28.4353	18.6504	19.6488	18.8637	16.7985	Q6PAT0	Adat3	3	4	1473.38	3825.96	1.3767	2.41364	2.38611
Q9D0L4	Adck1	AarF domain-containing protein kinase 1	ADCK1_MOUSE	59735.9	8	10	10	6	9	8	9	3.34281e+06	5.91671e+06	3.27682e+06	1.9341e+06	2.39322e+06	2.11963e+06	3.29253e+06	Q9D0L4	Adck1	59735.9		59735.9	Adck1	2962.64	5630.98	3393.71	1805.02	1598.33	1473.13	2032.77	Adck1	21.7173	33.5917	20.1562	13.9094	21.4292	18.6302	23.3406	Q9D0L4	Adck1	3	4	1701.41	3448.09	1.01907	1.10282	1.28004
Q80V03;Q80V03-2	Adck5	Uncharacterized aarF domain-containing protein kinase 5;Isoform 2 of Uncharacterized aarF domain-containing protein kinase 5	ADCK5_MOUSE	66654.45;66654.45-2	2	2	0	0	3	3	3	100082	181725	NaN	NaN	139983	143917	225116	Q80V03	Adck5	66654.4		66654.4	Adck5	79.4933	154.997			83.7851	89.6395	124.558	Adck5	0.582718	0.924638			1.12333	1.13364	1.4302	Q80V03	Adck5	3	2	99.3274	117.245	0.239265	0.157012	0.431851
P51829	Adcy7	Adenylate cyclase type 7	ADCY7_MOUSE	122708	8	15	14	12	15	18	15	715626	2.11441e+06	1434131	1.13477e+06	1.55496e+06	1.96139e+06	2.40293e+06	P51829	Adcy7	122708		122708	Adcy7	308.757	979.616	723.061	515.554	505.554	663.6	722.208	Adcy7	2.26331	5.84391	4.29445	3.97282	6.77808	8.39233	8.29253	P51829	Adcy7	3	4	630.454	631.747	0.0029552	0.0857442	0.370011
Q9QYC0	Add1	Alpha-adducin	ADDA_MOUSE	80646.5	32	34	35	32	43	43	44	77578024	83696088	69234136	62585088	108753480	107779824	126015224	Q9QYC0	Add1	80646.5		80646.5	Add1	50927.9	59000.9	53112	43263.7	53799.3	55483.9	57627.7	Add1	373.321	351.971	315.447	333.387	721.3	701.686	661.692	Q9QYC0	Add1	3	4	55637	51576.1	-0.10934	0.46337	0.706039
Q9QYB5	Add3	Gamma-adducin	ADDG_MOUSE	78777.1	26	27	30	29	43	44	43	58348432	62341172	54953176	53186924	85696832	87213512	111267792	Q9QYB5	Add3	78777.1		78777.1	Add3	39213.1	44989.9	43157	37639.5	43399.4	45962	52091.1	Add3	287.448	268.388	256.321	290.047	581.867	581.266	598.12	Q9QYB5	Add3	3	4	47150.9	41249.9	-0.192894	0.99405	1.18218
Q9QYB5-2	Add3	Isoform 1 of Gamma-adducin	ADDG_MOUSE	75406.6	2	2	2	2	2	2	2	375753	343595	312509	248013	693949	786310	965140	Q9QYB5	Add3	75406.6		75406.6	Add3	263.812	259.046	256.396	183.36	367.145	432.912	472.036	Add3	1.93385	1.54534	1.52281	1.41296	4.9224	5.4749	5.42	Q9QYB5	Add3	3	4	424.031	240.654	-0.817211	2.29411	2.29075	down
Q9Z0M6;Q9Z0M6-3	Adgre5	Adhesion G protein-coupled receptor E5;Isoform 3 of Adhesion G protein-coupled receptor E5	AGRE5_MOUSE	90413.37;90413.37-3	16	16	19	17	19	19	19	16395818	15502984	17059304	12267939	11678287	11875767	15615794	Q9Z0M6	Adgre5	90413.4		90413.4	Adgre5	9600.7	9748.15	11673.1	7564.45	5153.06	5453.11	6369.79	Adgre5	70.3769	58.1527	69.3298	58.2912	69.0884	68.9636	73.1391	Q9Z0M6	Adgre5	3	4	5658.65	9646.6	0.769562	2.17759	2.19691
P28474	Adh5	Alcohol dehydrogenase class-3	ADHX_MOUSE	39547.7	21	21	22	22	24	23	24	139650912	162686304	162804704	134905216	117764232	121914776	154096576	P28474	Adh5	39547.7		39547.7	Adh5	186950	233867	254685	190172	118798	127982	143703	Adh5	1370.41	1395.14	1512.64	1465.45	1592.76	1618.55	1650.02	P28474	Adh5	3	4	130161	216418	0.733523	2.36445	2.34588
Q99JT9	Adi1	Acireductone dioxygenase	MTND_MOUSE	21523.5	9	9	10	10	9	9	9	8757059	11141492	12183673	9427313	6205636	6.12866e+06	7734303	Q99JT9	Adi1	21523.5		21523.5	Adi1	21540	29428.5	35020.5	24418.1	11502.5	11821.4	13252.6	Adi1	157.897	175.556	207.996	188.165	154.217	149.501	152.169	Q99JT9	Adi1	3	4	12192.1	27601.8	1.17881	2.77068	2.65075
Q9D1K7	Adissp	Adipose-secreted signaling protein	ADSSP_MOUSE	19476.2	4	4	4	4	5	5	5	2.44648e+06	2.89396e+06	3.13753e+06	2.71711e+06	2.0058e+06	1813484	2.47824e+06	Q9D1K7	Adissp	19476.2		19476.2	Adissp	6650.28	8447.48	9966.48	7777.52	4108.67	3865.67	4692.8	Adissp	48.7492	50.3936	59.1936	59.9331	55.086	48.8878	53.8836	Q9D1K7	Adissp	3	4	4222.38	8210.44	0.959402	2.71551	2.61107
P55264	Adk	Adenosine kinase	ADK_MOUSE	40148.8	20	18	21	19	26	26	26	38411976	42497316	43215804	35340212	34575872	33126028	40306600	P55264	Adk	40148.8		40148.8	Adk	50652	60176.8	66593	49072.2	34357.4	34254.1	37025.2	Adk	371.299	358.985	395.514	378.147	460.638	433.2	425.131	P55264	Adk	3	4	35212.2	56623.5	0.685324	2.49916	2.45128
Q9Z103	Adnp	Activity-dependent neuroprotector homeobox protein	ADNP_MOUSE	124308	45	42	40	40	40	43	41	22927454	27278142	23393252	19964466	12767714	14660439	19295360	Q9Z103	Adnp	124308		124308	Adnp	9764.72	12475.4	11642.6	8953.6	4097.64	4896.25	5724.64	Adnp	71.5793	74.4224	69.1486	68.9959	54.9381	61.9213	65.7314	Q9Z103	Adnp	3	4	4906.18	10709.1	1.12616	2.86875	2.72131
Q8CHC8	Adnp2	Activity-dependent neuroprotector homeobox protein 2	ADNP2_MOUSE	126768	6	6	7	6	4	5	5	1.25734e+06	1.56059e+06	1.59103e+06	1.30242e+06	550900	648540	901969	Q8CHC8	Adnp2	126768		126768	Adnp2	525.101	699.87	776.471	572.768	173.373	212.393	262.406	Adnp2	3.8492	4.17508	4.61167	4.41371	2.32445	2.68606	3.013	Q8CHC8	Adnp2	3	4	216.057	643.552	1.57464	3.17475	2.92871
Q6PDY2	Ado	2-aminoethanethiol dioxygenase	AEDO_MOUSE	28372.4	14	13	14	13	16	15	15	10738268	12924811	12789269	11524936	8546628	8606215	11164276	Q6PDY2	Ado	28372.4		28372.4	Ado	20037.3	25898	27887.4	22645.4	12017.6	12593	14512	Ado	146.882	154.495	165.631	174.504	161.123	159.26	166.63	Q6PDY2	Ado	3	4	13040.9	24117	0.887011	2.79166	2.66712
Q8VDL4;Q8VDL4-3	Adpgk	ADP-dependent glucokinase;Isoform 3 of ADP-dependent glucokinase	ADPGK_MOUSE	53902.46;53902.46-3	15	15	16	15	19	18	19	23979482	24716356	22954852	20338864	17788480	19114322	22739452	Q8VDL4	Adpgk	53902.5		53902.5	Adpgk	23552.3	26068.5	26346.6	21035.7	13165.9	14722	15558.4	Adpgk	172.648	155.512	156.479	162.1	176.518	186.184	178.645	Q8VDL4	Adpgk	3	4	14482.1	24250.8	0.743761	3.00807	2.81883
P54923	Adprh	ADP-ribosylhydrolase ARH1	ADPRH_MOUSE	40068.3	17	16	16	16	19	19	19	46076348	49315028	46194904	38528936	37874388	39208400	48175828	P54923	Adprh	40068.3		40068.3	Adprh	60880.7	69971	71326.6	53607.4	37710.6	40625	44342.7	Adprh	446.28	417.413	423.628	413.095	505.596	513.771	509.151	P54923	Adprh	3	4	40892.8	63946.4	0.645017	2.39606	2.37171
Q99KS6;Q99KS6-2	Adprm	Manganese-dependent ADP-ribose/CDP-alcohol diphosphatase;Isoform 2 of Manganese-dependent ADP-ribose/CDP-alcohol diphosphatase	ADPRM_MOUSE	38947.8;38947.8-2	1	0	4	3	2	3	1	163117	NaN	456929	381795	348011	331606	176546	Q99KS6	Adprm	38947.8		38947.8	Adprm	221.727		725.811	546.494	356.475	353.471	167.174	Adprm	1.62535		4.31079	4.21125	4.77935	4.47023	1.91953	Q99KS6	Adprm	3	3	292.374	498.011	0.768364	0.472689	0.714673
Q8CG72	Adprs	ADP-ribosylhydrolase ARH3	ADPRS_MOUSE	39414.2	11	11	10	10	14	14	15	20877174	25336236	23078874	19721158	21826180	22954776	27959846	Q8CG72	Adprs	39414.2		39414.2	Adprs	28042.8	36545	36226	27894.5	22092.4	24178.8	26162.3	Adprs	205.565	218.01	215.156	214.953	296.199	305.782	300.4	Q8CG72	Adprs	3	4	24144.5	32177.1	0.414337	1.44332	1.58351
Q9JKV1	Adrm1	Proteasomal ubiquitin receptor ADRM1	ADRM1_MOUSE	42060.1	12	12	12	12	13	13	14	49900840	53156316	53923300	43352400	27891334	27429206	33546248	Q9JKV1	Adrm1	42060.1		42060.1	Adrm1	62811.5	71849.5	79316.6	57462	26455.6	27074.3	29414.9	Adrm1	460.433	428.619	471.082	442.799	354.697	342.4	337.747	Q9JKV1	Adrm1	3	4	27648.3	67859.9	1.29537	3.78052	3.27446
P54822	Adsl	Adenylosuccinate lyase	PUR8_MOUSE	54866.2	29	27	29	27	33	32	34	102376128	117655280	123825848	92551400	61583688	68792328	90060048	P54822	Adsl	54866.2		54866.2	Adsl	98786.2	121912	139625	94040.9	44779.6	52053.6	60537	Adsl	724.142	727.267	829.273	724.673	600.371	658.304	695.097	P54822	Adsl	3	4	52456.7	113591	1.11465	2.68411	2.589
P28650	Adss1	Adenylosuccinate synthetase isozyme 1	PURA1_MOUSE	50254.4	16	16	15	17	26	26	25	7.8448e+06	7984257	7253524	8.06251e+06	10679248	10158372	11193206	P28650	Adss1	50254.4		50254.4	Adss1	8264.37	9032.32	8929.62	8944.05	8477.84	8391.99	8214.36	Adss1	60.5811	53.8825	53.0354	68.9222	113.665	106.131	94.3188	P28650	Adss1	3	4	8361.4	8792.59	0.0725443	0.960668	1.15243
P46664	Adss2	Adenylosuccinate synthetase isozyme 2	PURA2_MOUSE	50021	20	21	21	21	24	24	24	83205000	111261480	105138128	74398416	31425832	34956888	48118476	P46664	Adss2	50021		50021	Adss2	88064.1	126454	130037	82918.1	25064.2	29013.2	35477.5	Adss2	645.545	754.361	772.323	638.962	336.041	366.92	407.359	P46664	Adss2	3	4	29851.6	106868	1.83995	3.24497	2.97169
Q9Z248;Q9Z248-2	Aebp2	Zinc finger protein AEBP2;Isoform 2 of Zinc finger protein AEBP2	AEBP2_MOUSE	52963.03;52963.03-2	12	14	12	12	6	3	5	4.71517e+06	6.26784e+06	4.29202e+06	3.58018e+06	478559	318534	768920	Q9Z248	Aebp2	52963		52963	Aebp2	4713.32	6727.98	5013.57	3768.51	360.481	249.688	535.429	Aebp2	34.5505	40.1358	29.7769	29.0399	4.83305	3.15772	6.14789	Q9Z248	Aebp2	3	4	381.866	5055.84	3.72681	4.01134	3.37592	up
Q9CZI9	Aen	Apoptosis-enhancing nuclease	AEN_MOUSE	37309.2	8	9	9	9	3	2	3	6880892	7.9005e+06	7.48978e+06	6.42937e+06	234483	191535	312332	Q9CZI9	Aen	37309.2		37309.2	Aen	9764.07	12038.6	12419.7	9607.07	250.734	213.131	308.741	Aen	71.5745	71.8167	73.7639	74.0314	3.36166	2.6954	3.54502	Q9CZI9	Aen	3	4	257.536	10957.4	5.41099	6.19903	3.68657	up
O88573	Aff1	AF4/FMR2 family member 1	AFF1_MOUSE	131558	3	0	0	4	6	6	6	114918	NaN	NaN	222102	234093	283118	390340	O88573	Aff1	131558		131558	Aff1	46.2458			94.1182	70.989	89.3441	109.426	Aff1	0.339			0.725269	0.951767	1.1299	1.25645	O88573	Aff1	3	2	89.9196	70.182	-0.357534	0.384237	0.634771
P51827	Aff3	AF4/FMR2 family member 3	AFF3_MOUSE	136131	12	11	12	11	14	15	14	1.40724e+06	1.5098e+06	1.54099e+06	1.39064e+06	1.56961e+06	1.75947e+06	2.3121e+06	P51827	Aff3	136131		136131	Aff3	547.288	630.524	700.33	569.506	459.995	536.588	626.388	Aff3	4.01184	3.7614	4.15944	4.38857	6.16727	6.78605	7.1923	P51827	Aff3	3	4	540.991	611.912	0.177721	0.588029	0.819118
Q9ESC8	Aff4	AF4/FMR2 family member 4	AFF4_MOUSE	126639	6	7	7	6	6	6	6	1.24295e+06	2.28594e+06	2.36923e+06	2.05933e+06	1087763	1.256e+06	1.15726e+06	Q9ESC8	Aff4	126639		126639	Aff4	519.624	1026.21	1157.44	906.559	342.677	411.754	337.022	Aff4	3.80905	6.12187	6.87433	6.98588	4.59435	5.20732	3.86975	Q9ESC8	Aff4	3	4	363.818	902.458	1.31064	1.9968	2.05453
Q3V384	Afg1l	AFG1-like ATPase	AFG1L_MOUSE	54313.2	6	6	7	4	6	7	8	1.16752e+06	1.46468e+06	1.69778e+06	745024	976801	1.44281e+06	1.9472e+06	Q3V384	Afg1l	54313.2		54313.2	Afg1l	1138.05	1533.13	1933.9	764.722	717.497	1102.86	1322.21	Afg1l	8.34236	9.14588	11.4859	5.8929	9.61965	13.9475	15.1818	Q3V384	Afg1l	3	4	1047.52	1342.45	0.357888	0.331531	0.587873
Q3UMC0	Afg2a	ATPase family gene 2 protein homolog A	AFG2A_MOUSE	97255.8	47	43	46	43	35	34	36	109175424	130524000	108723936	85298480	38487388	36330200	42530060	Q3UMC0	Afg2a	97255.8		97255.8	Afg2a	59430.8	76298.2	69162.1	48895	15787.8	15508.4	16127.8	Afg2a	435.651	455.158	410.772	376.781	211.671	196.13	185.182	Q3UMC0	Afg2a	3	4	15808	63446.5	2.00489	4.14087	3.42759
A0A7N9VSG0	Afg2b	ATPase family gene 2 protein homolog B	AFG2B_MOUSE	80742.2	16	15	14	15	10	8	11	3.94302e+06	4.10241e+06	4.08161e+06	4.29957e+06	1.88047e+06	1.08124e+06	2.6683e+06	A0A7N9VSG0	Afg2b	80742.2		80742.2	Afg2b	2585.42	2888.54	3127.44	2968.68	929.15	555.95	1218.79	Afg2b	18.9522	17.2316	18.5747	22.8764	12.4573	7.03091	13.9944	A0A7N9VSG0	Afg2b	3	4	901.296	2892.52	1.68225	2.77251	2.65226
Q920A7	Afg3l1	AFG3-like protein 1	AFG31_MOUSE	87046.7	20	22	24	20	17	19	15	10282430	11853792	10002792	7350275	3696465	3.77421e+06	4.20576e+06	Q920A7	Afg3l1	87046.7		87046.7	Afg3l1	6253.83	7741.85	7109.31	4707.5	1694.16	1800.07	1781.91	Afg3l1	45.843	46.1841	42.2241	36.2757	22.714	22.7649	20.4602	Q920A7	Afg3l1	3	4	1758.71	6453.12	1.87548	3.74683	3.25808
Q8JZQ2	Afg3l2	AFG3-like protein 2	AFG32_MOUSE	89518.8	35	37	34	36	38	41	42	31658050	35485492	29093238	25967744	21621676	23702870	32028370	Q8JZQ2	Afg3l2	89518.8		89518.8	Afg3l2	18722.9	22536	20106.5	16171.8	9635.95	10992.6	13195.2	Afg3l2	137.246	134.439	119.418	124.619	129.192	139.02	151.509	Q8JZQ2	Afg3l2	3	4	11274.6	19384.3	0.781814	2.32842	2.3175
Q80WT5;Q80WT5-2	Aftph	Aftiphilin;Isoform 2 of Aftiphilin	AFTIN_MOUSE	101130.56;101130.56-2	25	24	26	21	23	25	24	8537628	8816160	8393252	6242438	3.90768e+06	5656265	7.06509e+06	Q80WT5	Aftph	101131		101131	Aftph	4469.48	4956.06	5134.59	3441.2	1541.54	2322	2576.49	Aftph	32.7631	29.5654	30.4957	26.5177	20.6678	29.3656	29.5838	Q80WT5	Aftph	3	4	2146.68	4500.33	1.06793	2.1702	2.19169
Q64191	Aga	N(4)-(beta-N-acetylglucosaminyl)-L-asparaginase	ASPG_MOUSE	37022	0	0	0	0	1	2	0	NaN	NaN	NaN	NaN	80687.7	300110	NaN	Q64191	Aga	37022		37022	Aga					86.9494	336.54		Aga					1.16575	4.25611		Q64191	Aga	2		211.745
Q3UHD9;Q3UHD9-2	Agap2	Arf-GAP with GTPase, ANK repeat and PH domain-containing protein 2;Isoform 2 of Arf-GAP with GTPase, ANK repeat and PH domain-containing protein 2	AGAP2_MOUSE	124510.59;124510.59-2	16	15	15	14	19	17	20	13766044	12316325	8.18124e+06	6787058	13974887	17215126	27749456	Q3UHD9	Agap2	124511		124511	Agap2	5853.36	5623.6	4065.1	3038.88	4477.76	5740.1	8219.43	Agap2	42.9074	33.5477	24.1437	23.4174	60.0345	72.5931	94.3771	Q3UHD9	Agap2	3	4	6145.76	4645.23	-0.403841	0.550249	0.785534
Q8VHH5	Agap3	Arf-GAP with GTPase, ANK repeat and PH domain-containing protein 3	AGAP3_MOUSE	97965.2	6	8	7	6	4	3	5	1.219e+06	1.9851e+06	2.18508e+06	1507768	786525	464056	1.06902e+06	Q8VHH5	Agap3	97965.2		97965.2	Agap3	658.771	1151.99	1379.92	858.028	320.302	196.659	402.445	Agap3	4.82905	6.87223	8.19572	6.6119	4.29437	2.48708	4.62095	Q8VHH5	Agap3	3	4	306.469	1012.18	1.72365	2.22655	2.23661
Q8K2K6;Q8K2K6-1;Q8K2K6-3	Agfg1	Arf-GAP domain and FG repeat-containing protein 1;Isoform 1 of Arf-GAP domain and FG repeat-containing protein 1;Isoform 3 of Arf-GAP domain and FG repeat-containing protein 1	AGFG1_MOUSE	58042.84;58042.84-1;58042.84-3	12	12	11	12	11	13	13	24099398	28106734	23511334	19292638	10904687	12384740	17686076	Q8K2K6	Agfg1	58042.8		58042.8	Agfg1	21981.6	27529.7	25060.3	18530.3	7495.21	8858.36	11237.7	Agfg1	161.134	164.229	148.84	142.793	100.49	112.029	129.033	Q8K2K6	Agfg1	3	4	9197.08	23275.5	1.33956	2.91779	2.75462
Q80WC7;Q80WC7-2	Agfg2	Arf-GAP domain and FG repeat-containing protein 2;Isoform 2 of Arf-GAP domain and FG repeat-containing protein 2	AGFG2_MOUSE	48968.03;48968.03-2	7	8	7	7	4	6	4	1.66443e+06	1.72997e+06	2017436	1.70192e+06	844946	1.17492e+06	1.02344e+06	Q80WC7	Agfg2	48968		48968	Agfg2	1799.51	2008.48	2548.86	1937.6	688.391	996.115	770.803	Agfg2	13.1911	11.9816	15.1383	14.931	9.22943	12.5975	8.85051	Q80WC7	Agfg2	3	4	818.437	2073.61	1.3412	3.12432	2.89605
Q7TN31	Aggf1	Angiogenic factor with G patch and FHA domains 1	AGGF1_MOUSE	79445.3	8	9	9	8	6	7	5	1.76957e+06	2.4807e+06	2.14189e+06	1.39821e+06	486020	604332	401748	Q7TN31	Aggf1	79445.3		79445.3	Aggf1	1179.24	1775.2	1667.97	981.169	244.065	315.808	186.5	Aggf1	8.64429	10.59	9.90651	7.56083	3.27224	3.99391	2.14143	Q7TN31	Aggf1	3	4	248.791	1400.89	2.49334	3.35666	3.03756	up
Q9ESW4	Agk	Acylglycerol kinase, mitochondrial	AGK_MOUSE	46976	19	19	19	19	25	26	24	28874902	29876256	27499524	25155728	20179424	24694818	29960838	Q9ESW4	Agk	46976		46976	Agk	32542.2	36156.8	36216.6	29853.8	17137.7	21824.5	23521.9	Agk	238.547	215.694	215.1	230.051	229.769	276.007	270.082	Q9ESW4	Agk	3	4	20828	33692.3	0.693894	2.39157	2.3681
Q8CJG1	Ago1	Protein argonaute-1	AGO1_MOUSE	97214.3	37	38	39	34	45	47	45	37547336	37420432	37510132	32759620	42949324	47145052	63500712	Q8CJG1	Ago1	97214.3		97214.3	Ago1	20448	21883.6	23871.3	18786.6	17625.7	20133.6	24090.3	Ago1	149.892	130.547	141.778	144.768	236.311	254.623	276.609	Q8CJG1	Ago1	3	4	20616.5	21247.4	0.0434839	0.133253	0.41132
Q8CJG0	Ago2	Protein argonaute-2	AGO2_MOUSE	97304.2	35	35	36	35	41	41	41	52246276	102751904	51444784	45521112	46871208	49713032	68011232	Q8CJG0	Ago2	97304.2		97304.2	Ago2	28426.7	60034.1	32709.1	26080.7	19217.4	21210.6	25777.6	Ago2	208.379	358.134	194.268	200.976	257.652	268.244	295.983	Q8CJG0	Ago2	3	4	22068.5	36812.6	0.73821	0.974725	1.16464
O35083	Agpat1	1-acyl-sn-glycerol-3-phosphate acyltransferase alpha	PLCA_MOUSE	31709.3	4	5	4	4	4	4	4	7298813	5.68309e+06	6089861	3.3768e+06	4322440	4300018	4.70333e+06	O35083	Agpat1	31709.3		31709.3	Agpat1	12186.2	10189.1	11881.7	5936.87	5438.27	5629.87	5470.32	Agpat1	89.3295	60.7833	70.5686	45.7491	72.9123	71.1991	62.8112	O35083	Agpat1	3	4	5512.82	10048.5	0.866113	1.43839	1.5792
Q8K3K7	Agpat2	1-acyl-sn-glycerol-3-phosphate acyltransferase beta	PLCB_MOUSE	31010.6	7	5	6	6	7	7	7	1912842	1.33555e+06	1.51919e+06	1.18554e+06	2322808	3002101	3.58632e+06	Q8K3K7	Agpat2	31010.6		31010.6	Agpat2	3265.66	2448.44	3030.82	2131.31	2988.29	4019.12	4265.14	Agpat2	23.9386	14.6062	18.0008	16.4237	40.0647	50.8284	48.9731	Q8K3K7	Agpat2	3	4	3757.51	2719.06	-0.466673	1.10403	1.28116
Q9D517	Agpat3	1-acyl-sn-glycerol-3-phosphate acyltransferase gamma	PLCC_MOUSE	43295.8	12	12	13	13	13	14	13	6.0636e+06	7.18965e+06	6672913	6.10558e+06	7.52203e+06	7123743	8653094	Q9D517	Agpat3	43295.8		43295.8	Agpat3	7414.58	9440.63	9535.15	7861.75	6931.19	6830.89	7370.87	Agpat3	54.3518	56.3182	56.6318	60.5821	92.9282	86.3879	84.6337	Q9D517	Agpat3	3	4	7044.32	8563.03	0.281661	1.22633	1.39144
Q8K4X7	Agpat4	1-acyl-sn-glycerol-3-phosphate acyltransferase delta	PLCD_MOUSE	43810.4	5	9	9	9	10	10	8	2.518e+06	6745050	3.86631e+06	3.198e+06	1973776	2.27618e+06	2.41964e+06	Q8K4X7	Agpat4	43810.4		43810.4	Agpat4	3042.85	8752.81	5459.81	4069.49	1797.38	2156.98	2036.89	Agpat4	22.3053	52.215	32.4273	31.3592	24.0979	27.2786	23.388	Q8K4X7	Agpat4	3	4	1997.08	5331.24	1.41658	1.69351	1.79919
Q9D1E8	Agpat5	1-acyl-sn-glycerol-3-phosphate acyltransferase epsilon	PLCE_MOUSE	42202.3	7	5	5	4	0	0	2	1.51581e+06	1.30272e+06	1.20141e+06	749032	NaN	NaN	362857	Q9D1E8	Agpat5	42202.3		42202.3	Agpat5	1901.56	1754.91	1761.22	989.47			317.098	Agpat5	13.9392	10.469	10.4604	7.62479			3.64098	Q9D1E8	Agpat5	1	4	317.098	1601.79	2.33669	1.73781	1.8363
Q8C0I1	Agps	Alkyldihydroxyacetonephosphate synthase, peroxisomal	ADAS_MOUSE	71683.5	25	25	26	26	24	26	27	31162706	35593864	30790656	26311502	12354733	13623601	17550052	Q8C0I1	Agps	71683.5		71683.5	Agps	23015.4	28229	26574.1	20462.8	6875.96	7890.2	9029.27	Agps	168.712	168.4	157.83	157.685	92.1876	99.7847	103.676	Q8C0I1	Agps	3	4	7931.81	24570.3	1.63119	3.85933	3.31688
O88312	Agr2	Anterior gradient protein 2 homolog	AGR2_MOUSE	19920	4	0	0	0	0	0	0	1.48374e+06	NaN	NaN	NaN	NaN	NaN	NaN	O88312	Agr2	19920		19920	Agr2	3943.39							Agr2	28.9066							O88312	Agr2		1		3943.39
Q641K1;Q641K1-2	Agtpbp1	Cytosolic carboxypeptidase 1;Isoform 2 of Cytosolic carboxypeptidase 1	CBPC1_MOUSE	137196.92;137196.92-2	4	4	8	5	3	4	5	478846	578015	2200475	1260912	778428	1.08996e+06	2.17194e+06	Q641K1	Agtpbp1	137197		137197	Agtpbp1	184.779	239.516	992.271	512.364	226.357	329.822	583.844	Agtpbp1	1.35451	1.42883	5.89336	3.94825	3.03482	4.17115	6.70381	Q641K1	Agtpbp1	3	4	380.008	482.233	0.343701	0.066812	0.35325
Q9WVK0	Agtrap	Type-1 angiotensin II receptor-associated protein	ATRAP_MOUSE	17525.2	2	2	2	2	2	2	2	891122	1.03158e+06	986736	939270	825435	506832	743032	Q9WVK0	Agtrap	17525.2		17525.2	Agtrap	2692	3346.41	3483.34	2987.89	1879.05	1200.65	1563.64	Agtrap	19.7334	19.963	20.6885	23.0245	25.1929	15.1842	17.954	Q9WVK0	Agtrap	3	4	1547.78	3127.41	1.01477	2.58485	2.51519
Q8CJF7	Ahctf1	Protein ELYS	ELYS_MOUSE	247646	79	87	83	83	71	80	75	47894084	63688704	51777748	42594796	20794764	23931662	28237208	Q8CJF7	Ahctf1	247646		247646	Ahctf1	10238.9	14620.8	12935.1	9588.78	3349.97	4011.96	4205.17	Ahctf1	75.0551	87.2204	76.825	73.8905	44.9139	50.7379	48.2846	Q8CJF7	Ahctf1	3	4	3855.7	11845.9	1.61932	3.43743	3.08555
P50247	Ahcy	Adenosylhomocysteinase	SAHH_MOUSE	47688.2	28	29	29	27	36	35	36	644476160	764428288	760330432	584760832	687249600	642924160	953237696	P50247	Ahcy	47688.2		47688.2	Ahcy	715482	911309	986393	683607	574941	559712	737198	Ahcy	5244.77	5436.43	5858.45	5267.83	7708.37	7078.49	8464.65	P50247	Ahcy	3	4	623950	824198	0.401559	1.0597	1.24032
Q80SW1	Ahcyl1	S-adenosylhomocysteine hydrolase-like protein 1	SAHH2_MOUSE	58951.4	10	9	9	9	11	10	10	8607296	10694735	8192855	6740039	5.79928e+06	5358597	7246731	Q80SW1	Ahcyl1	58951.4		58951.4	Ahcyl1	7729.92	10313.7	8598.04	6373.92	3924.63	3773.74	4533.58	Ahcyl1	56.6633	61.5266	51.066	49.117	52.6185	47.7252	52.0554	Q80SW1	Ahcyl1	3	4	4077.32	8253.9	1.01745	2.53889	2.47969
Q68FL4	Ahcyl2	Putative adenosylhomocysteinase 3	SAHH3_MOUSE	66899.4	21	21	23	21	24	24	23	27338822	28282538	29330534	22954804	20805774	20269752	24353958	Q68FL4	Ahcyl2	66899.4		66899.4	Ahcyl2	21635.2	24034.5	27124.2	19128.9	12407.4	12578.9	13425.8	Ahcyl2	158.594	143.378	161.098	147.406	166.349	159.081	154.158	Q68FL4	Ahcyl2	3	4	12804	22980.7	0.843823	2.8551	2.71035
Q6PAL7	Ahdc1	Transcription factor Gibbin	AHDC1_MOUSE	168081	9	10	9	9	20	23	24	1.33012e+06	1.41572e+06	1.09232e+06	966744	2.88773e+06	3473182	4657314	Q6PAL7	Ahdc1	168081		168081	Ahdc1	418.964	478.85	402.06	320.65	685.421	857.876	1021.91	Ahdc1	3.07117	2.85659	2.38794	2.47091	9.1896	10.8493	11.7337	Q6PAL7	Ahdc1	3	4	855.068	405.131	-1.07765	2.52614	2.47066	down
E9Q616	Ahnak	E9AHNAK nucleoprotein (desmoyokin)	E9Q616_MOU	604253	49	61	66	52	127	132	119	21937276	34918300	25117380	20756416	48893468	55548388	64805740	E9Q616	Ahnak	604253		604253	Ahnak	1922.06	3285.29	2571.66	1915.02	3228.13	3816.53	3955.38	Ahnak	14.0894	19.5985	15.2738	14.757	43.2804	48.2663	45.4164	E9Q616	Ahnak	3	4	3666.68	2423.51	-0.597378	1.36111	1.51108
P30561	Ahr	Aryl hydrocarbon receptor	AHR_MOUSE	95017	7	7	8	4	0	0	0	2299808	2.67488e+06	2.66396e+06	785900	NaN	NaN	NaN	P30561	Ahr	95017		95017	Ahr	1281.42	1600.45	1734.54	461.11				Ahr	9.39334	9.5475	10.3019	3.55328				P30561	Ahr		4		1269.38				up-a
Q8BK64	Ahsa1	Activator of 90 kDa heat shock protein ATPase homolog 1	AHSA1_MOUSE	38117.1	21	23	22	22	25	23	24	167766736	199853472	172106288	136979440	59761620	57249248	76463488	Q8BK64	Ahsa1	38117.1		38117.1	Ahsa1	233017	298079	279341	200343	62549.1	62354.1	73982.3	Ahsa1	1708.11	1778.19	1659.08	1543.83	838.612	788.571	849.478	Q8BK64	Ahsa1	3	4	66295.2	252695	1.93042	4.04302	3.38823
Q8N9S3	Ahsa2	Activator of 90 kDa heat shock protein ATPase homolog 2	AHSA2_MOUSE	37648.2	8	9	9	8	7	7	6	4564535	5420819	5733256	4.07938e+06	1.27832e+06	1.21014e+06	1.16714e+06	Q8N9S3	Ahsa2	37648.2		37648.2	Ahsa2	6418.82	8185.79	9421.41	6040.73	1354.61	1334.47	1143.33	Ahsa2	47.0525	48.8324	55.9563	46.5495	18.1616	16.8766	13.1279	Q8N9S3	Ahsa2	3	4	1277.47	7516.69	2.55681	4.38355	3.49111	up
P29699	Ahsg	Alpha-2-HS-glycoprotein	FETUA_MOUSE	37325.6	1	1	1	1	3	3	3	193197008	232821904	48154936	27182914	168526064	241350848	298414048	P29699	Ahsg	37325.6		37325.6	Ahsg	274028	354614	79816.4	40600.1	180127	268446	294853	Ahsg	2008.74	2115.46	474.051	312.862	2415.01	3394.95	3385.56	P29699	Ahsg	3	4	247809	187265	-0.404148	0.422472	0.669363
Q8C4Q6	Aida	Axin interactor, dorsalization-associated protein	AIDA_MOUSE	34888	13	13	15	14	13	14	12	8613703	11197476	12297177	10763582	8982649	10160834	12973004	Q8C4Q6	Aida	34888		34888	Aida	13071.2	18246.6	21806.6	17199.6	10271.8	12091.2	13713.8	Aida	95.8171	108.851	129.515	132.539	137.717	152.913	157.464	Q8C4Q6	Aida	3	4	12025.6	17581	0.54791	1.30419	1.46071
Q9Z0X1	Aifm1	Apoptosis-inducing factor 1, mitochondrial	AIFM1_MOUSE	66765.5	28	27	27	27	32	32	31	63029288	68918312	63371620	55119376	52235640	54190184	64215760	Q9Z0X1	Aifm1	66765.5		66765.5	Aifm1	49979.6	58684.3	58722	46024.7	31212.9	33696.4	35471.8	Aifm1	366.37	350.082	348.766	354.663	418.479	426.147	407.294	Q9Z0X1	Aifm1	3	4	33460.4	53352.6	0.673106	2.7036	2.60248
Q91VJ1	Aim2	Interferon-inducible protein AIM2	AIM2_MOUSE	40155.1	17	17	21	18	16	16	16	6.09514e+06	7938832	8051330	6400753	3.85916e+06	4562208	5.55731e+06	Q91VJ1	Aim2	40155.1		40155.1	Aim2	8036.1	11239.7	12404.7	8886.46	3834.17	4716.82	5104.08	Aim2	58.9078	67.0507	73.6747	68.4785	51.4057	59.6521	58.606	Q91VJ1	Aim2	3	4	4551.69	10141.7	1.15583	2.63724	2.55389
P31230	Aimp1	Aminoacyl tRNA synthase complex-interacting multifunctional protein 1	AIMP1_MOUSE	33997.2	21	22	23	22	21	21	21	79694808	100081920	101184648	77137688	29962084	30748588	37858232	P31230	Aimp1	33997.2		33997.2	Aimp1	124105	167360	184132	126492	35159.9	37548.9	41068.6	Aimp1	909.738	998.388	1093.61	974.735	471.397	474.868	471.558	P31230	Aimp1	3	4	37925.8	150522	1.98872	3.97818	3.36655
Q8R010	Aimp2	Aminoacyl tRNA synthase complex-interacting multifunctional protein 2	AIMP2_MOUSE	35377.6	12	12	12	12	11	9	10	51954904	60642760	56427612	44021324	17879156	15875295	20889276	Q8R010	Aimp2	35377.6		35377.6	Aimp2	77750	97451.9	98678.3	69370.3	20162.2	18629.8	21776.5	Aimp2	569.939	581.35	586.077	534.563	270.32	235.605	250.042	Q8R010	Aimp2	3	4	20189.5	85812.6	2.08758	4.34419	3.48594
O08915	Aip	AH receptor-interacting protein	AIP_MOUSE	37604.9	15	15	15	15	19	18	19	46819828	56520360	49790908	40796092	30524472	34000020	46286564	O08915	Aip	37604.9		37604.9	Aip	65915.5	85447.5	81915	60480.1	32383.4	37536.1	45394.6	Aip	483.186	509.738	486.515	466.055	434.172	474.707	521.229	O08915	Aip	3	4	38438	73439.5	0.934022	2.40118	2.3762
Q924K1	Aipl1	Aryl-hydrocarbon-interacting protein-like 1	AIPL1_MOUSE	38211.9	0	0	1	0	0	0	0	NaN	NaN	59495.9	NaN	NaN	NaN	NaN	Q924K1	Aipl1	38211.9		38211.9	Aipl1			96.3266					Aipl1			0.572109					Q924K1	Aipl1		1		96.3266
Q9WTP6;Q9WTP6-2	Ak2	Adenylate kinase 2, mitochondrial;Isoform 2 of Adenylate kinase 2, mitochondrial	KAD2_MOUSE	26468.7;26468.7-2	15	16	15	16	15	16	16	93674400	101115160	97883312	75177936	53004180	50622368	67623136	Q9WTP6	Ak2	26468.7		26468.7	Ak2	187366	217182	228789	158342	79890.8	79400.8	94222.9	Ak2	1373.47	1295.6	1358.84	1220.17	1071.12	1004.16	1081.88	Q9WTP6	Ak2	3	4	84504.8	197920	1.22781	3.25123	2.97441
Q9WTP7	Ak3	GTP:AMP phosphotransferase AK3, mitochondrial	KAD3_MOUSE	25426.3	15	15	15	15	18	18	19	23395524	25282194	20911376	17158146	23913260	25648094	34801796	Q9WTP7	Ak3	25426.3		25426.3	Ak3	48713.8	56528.9	50881.2	37620.6	37521	41878.1	50479.1	Ak3	357.091	337.224	302.197	289.902	503.053	529.618	579.611	Q9WTP7	Ak3	3	4	43292.8	48436.1	0.161958	0.372403	0.624078
Q8VCP8	Ak6	Adenylate kinase isoenzyme 6	KAD6_MOUSE	19947.4	5	5	6	5	0	0	0	2.67005e+06	3018261	3170021	2.13312e+06	NaN	NaN	NaN	Q8VCP8	Ak6	19947.4		19947.4	Ak6	7086.57	8602.22	9831.84	5961.67				Ak6	51.9474	51.3167	58.394	45.9402				Q8VCP8	Ak6		4		7870.58				up-a
O08715;O08715-2;O08715-3;O08715-4;O08715-5;O08715-6	Akap1	A-kinase anchor protein 1, mitochondrial;Isoform 1 of A-kinase anchor protein 1, mitochondrial;Isoform 2 of A-kinase anchor protein 1, mitochondrial;Isoform 4 of A-kinase anchor protein 1, mitochondrial;Isoform 5 of A-kinase anchor protein 1, mitochondrial;Isoform 6 of A-kinase anchor protein 1, mitochondrial	AKAP1_MOUSE	92194.71;92194.71-2;92194.71-3;92194.71-4;92194.71-5;92194.71-6	1	2	1	1	0	0	0	158863	516159	238790	154932	NaN	NaN	NaN	O08715	Akap1	92194.7		92194.7	Akap1	91.2259	318.286	160.239	93.6858				Akap1	0.668722	1.89874	0.951702	0.721936				O08715	Akap1		4		165.859				up-a
O88845	Akap10	A-kinase anchor protein 10, mitochondrial	AKA10_MOUSE	73632	15	16	17	18	18	19	19	3.58512e+06	4928010	5795382	4.25249e+06	4112743	4.46788e+06	5.72312e+06	O88845	Akap10	73632		73632	Akap10	2577.74	3804.91	4869.38	3219.7	2228.35	2519.13	2866.55	Akap10	18.8959	22.6983	28.9206	24.8108	29.8761	31.8586	32.9143	O88845	Akap10	3	4	2538.01	3617.93	0.511468	0.967208	1.15828
E9Q777	Akap11	E9A kinase (PRKA) anchor protein 11	E9Q777_MOU	208761	16	13	16	14	21	21	20	1844077	1750616	2.1241e+06	1.31887e+06	2.62147e+06	2.51042e+06	3.15152e+06	E9Q777	Akap11	208761		208761	Akap11	467.661	476.739	629.482	352.201	500.973	499.243	556.755	Akap11	3.42814	2.84399	3.73866	2.71404	6.71667	6.31376	6.39276	E9Q777	Akap11	3	4	518.99	481.521	-0.10811	0.268646	0.530849
Q9WTQ5;Q9WTQ5-2	Akap12	A-kinase anchor protein 12;Isoform 2 of A-kinase anchor protein 12	AKA12_MOUSE	180694.75;180694.75-2	32	37	27	33	31	33	28	7431947	9811789	6622180	7.98048e+06	7.79635e+06	8879546	8103166	Q9WTQ5	Akap12	180695		180695	Akap12	2177.51	3087.04	2267.32	2462.19	1721.33	2040.14	1653.88	Akap12	15.962	18.4158	13.4662	18.9735	23.0783	25.801	18.9901	Q9WTQ5	Akap12	3	4	1805.12	2498.52	0.468979	1.51878	1.64943
E9Q394-2	Akap13	Isoform 2 of A-kinase anchor protein 13	AKP13_MOUSE	301499	63	60	71	68	97	101	92	25079034	32778844	27777214	23167482	45264696	47391976	61595192	E9Q394	Akap13	301499		301499	Akap13	4403.8	6180.84	5699.83	4283.83	5989.54	6525.82	7534.51	Akap13	32.2816	36.8719	33.8528	33.0109	80.3032	82.5298	86.5127	E9Q394	Akap13	3	4	6683.29	5142.08	-0.378208	1.10796	1.28445
Q3V0I7	Akap14	Q3V0A kinase (PRKA) anchor protein 14	Q3V0I7_M	58230.5	0	0	0	1	0	0	0	NaN	NaN	NaN	148614	NaN	NaN	NaN	Q3V0I7	Akap14	58230.5		58230.5	Akap14				142.282				Akap14				1.09641				Q3V0I7	Akap14		1		142.282
Q9DBR0	Akap8	A-kinase anchor protein 8	AKAP8_MOUSE	76293.9	26	25	25	25	29	29	28	40614384	52011428	46777584	38021552	28733526	35559096	36212996	Q9DBR0	Akap8	76293.9		76293.9	Akap8	28183.3	38756.8	37932	27782.9	15025.1	19349.8	17505.2	Akap8	206.595	231.204	225.288	214.094	201.445	244.71	200.998	Q9DBR0	Akap8	3	4	17293.4	33163.8	0.939389	2.45654	2.41804
Q9R0L7	Akap8l	A-kinase anchor protein 8-like	AKP8L_MOUSE	71453.7	14	12	14	12	17	19	18	5.32169e+06	5.76351e+06	5.66354e+06	4.31643e+06	6.82219e+06	7135390	10291425	Q9R0L7	Akap8l	71453.7		71453.7	Akap8l	3943	4585.66	4903.67	3367.74	3809.07	4145.8	5311.83	Akap8l	28.9038	27.3558	29.1242	25.9516	51.0691	52.4305	60.9915	Q9R0L7	Akap8l	3	4	4422.23	4200.02	-0.074379	0.151038	0.426639
Q70FJ1;Q70FJ1-2;Q70FJ1-3	Akap9	A-kinase anchor protein 9;Isoform 2 of A-kinase anchor protein 9;Isoform 3 of A-kinase anchor protein 9	AKAP9_MOUSE	NaN;NaN-2;NaN-3	37	40	44	38	41	45	38	5.85314e+06	6983836	7556263	5.78645e+06	4735332	5277676	5.96287e+06	Q70FJ1	Akap9	436214		436214	Akap9	710.381	910.194	1071.68	739.522	433.082	502.294	504.138	Akap9	5.20738	5.42977	6.365	5.69871	5.80643	6.35235	5.7886	Q70FJ1	Akap9	3	4	479.838	857.945	0.838337	2.27992	2.27938
B1AXD8	Akirin2	Akirin-2	AKIR2_MOUSE	22113.1	0	2	0	1	0	0	0	NaN	606077	NaN	423650	NaN	NaN	NaN	B1AXD8	Akirin2	22113.1		22113.1	Akirin2		1558.18		1068.06				Akirin2		9.29535		8.23042				B1AXD8	Akirin2		2		1313.12
Q80VW7	Akna	Microtubule organization protein AKNA	AKNA_MOUSE	153123	37	36	37	39	39	39	40	12817595	15697479	16530661	12436760	13276146	14860000	16848012	Q80VW7	Akna	153123		153123	Akna	4431.67	5828.11	6678.94	4527.98	3458.99	4028.96	4057.9	Akna	32.4859	34.7677	39.668	34.8923	46.3756	50.9529	46.5935	Q80VW7	Akna	3	4	3848.62	5366.68	0.479689	1.28788	1.44624
Q9JII6	Akr1a1	AK1Aldo-keto reductase family 1 member A1	AK1A1_MO	36586.9	19	18	20	19	23	22	24	42420988	51650828	52150068	45439604	44355688	42934356	53644876	Q9JII6	Akr1a1	36586.9		36586.9	Akr1a1	61384.3	80258.5	88183.5	69238.4	48366.3	48718.5	54074.9	Akr1a1	449.971	478.783	523.745	533.547	648.458	616.127	620.899	Q9JII6	Akr1a1	3	4	50386.6	74766.2	0.569346	1.93933	2.007
P45376	Akr1b1	Aldo-keto reductase family 1 member B1	ALDR_MOUSE	35732.2	26	26	25	26	25	25	26	372604832	435134912	383752448	325822336	418334784	432329216	570607104	P45376	Akr1b1	35732.2		35732.2	Akr1b1	552066	692314	664430	508346	467071	502308	588940	Akr1b1	4046.86	4130.01	3946.23	3917.28	6262.14	6352.51	6762.31	P45376	Akr1b1	3	4	519439	604289	0.218283	0.666312	0.88867
G5E895;Q8BIV6	Akr1b10	G5Aldo-keto reductase family 1, member B10 (aldose reductase);Q8NADP-dependent oxidoreductase domain-containing protein	G5E895_MOU;Q8BIV6_MOU	35848.25;35848.3	12	12	10	9	13	12	12	16903724	7.74749e+06	6589593	9516301	10201874	30060716	13398956	G5E895	Akr1b10	35848.2		35848.2	Akr1b10	24964.1	12286.6	11372.3	14799.2	11353.5	34813.4	13784.7	Akr1b10	182.997	73.296	67.5432	114.042	152.22	440.273	158.278	G5E895	Akr1b10	3	4	19983.9	15855.6	-0.333846	0.165707	0.439122
Q9DCT1	Akr1e2	1,5-anhydro-D-fructose reductase	AKCL2_MOUSE	34460.7	4	5	4	4	3	3	3	819140	1.24034e+06	1.31363e+06	1.06865e+06	855424	569915	743470	Q9DCT1	Akr1e2	34460.7		34460.7	Akr1e2	1258.45	2046.24	2358.35	1728.82	990.322	686.596	795.669	Akr1e2	9.22494	12.2069	14.0069	13.3221	13.2775	8.68314	9.13602	Q9DCT1	Akr1e2	3	4	824.195	1847.96	1.16488	2.12529	2.15657
Q8CG76	Akr7a2	Aflatoxin B1 aldehyde reductase member 2	ARK72_MOUSE	40612.1	14	14	13	14	15	15	15	22120524	25187168	22208310	18191412	23189682	24909428	34076020	Q8CG76	Akr7a2	40612.1		40612.1	Akr7a2	28836.5	35258.4	33831.3	24971.8	22780.2	25463.8	30944.7	Akr7a2	211.383	210.335	200.933	192.431	305.42	322.032	355.313	Q8CG76	Akr7a2	3	4	26396.3	30724.5	0.219055	0.578833	0.810834
P31750	Akt1	RAC-alpha serine/threonine-protein kinase	AKT1_MOUSE	55707.3	17	17	18	19	19	23	21	22598764	28721656	27275728	20367610	21613608	23610986	29482036	P31750	Akt1	55707.3		55707.3	Akt1	21477	29311.4	30291.6	20382.9	15478.7	17596.1	19518.2	Akt1	157.435	174.857	179.91	157.069	207.526	222.532	224.111	P31750	Akt1	3	4	17531	25365.7	0.532974	1.35448	1.50512
Q9D1F4	Akt1s1	Proline-rich AKT1 substrate 1	AKTS1_MOUSE	27483.4	4	5	5	4	3	3	3	1.62266e+06	1.79111e+06	1.87455e+06	1.35607e+06	771343	602214	767182	Q9D1F4	Akt1s1	27483.4		27483.4	Akt1s1	3125.79	3705.03	4219.73	2750.74	1119.69	909.695	1029.49	Akt1s1	22.9133	22.1024	25.0621	21.197	15.0119	11.5046	11.8208	Q9D1F4	Akt1s1	3	4	1019.62	3450.32	1.75869	3.74694	3.25808
Q60823	Akt2	RAC-beta serine/threonine-protein kinase	AKT2_MOUSE	55741.7	14	14	17	15	21	21	21	6741704	8.33918e+06	10529144	8.01839e+06	5559147	6.49068e+06	8.22724e+06	Q60823	Akt2	55741.7		55741.7	Akt2	6403.12	8505.16	11686.1	8019.47	3978.75	4834.2	5443.37	Akt2	46.9374	50.7377	69.4071	61.7975	53.3441	61.1365	62.5017	Q60823	Akt2	3	4	4752.11	8653.47	0.864712	1.77531	1.86862
Q9WUA6;Q9WUA6-2	Akt3	RAC-gamma serine/threonine-protein kinase;Isoform 2 of RAC-gamma serine/threonine-protein kinase	AKT3_MOUSE	55714.41;55714.41-2	3	5	6	4	4	6	6	299206	673389	774467	314713	230520	552657	805572	Q9WUA6	Akt3	55714.4		55714.4	Akt3	284.319	687.129	859.99	314.91	165.067	411.816	533.25	Akt3	2.08417	4.09908	5.10771	2.42667	2.21309	5.2081	6.12287	Q9WUA6	Akt3	3	4	370.044	536.587	0.536114	0.356312	0.609993
Q64362	Aktip	AKT-interacting protein	AKTIP_MOUSE	32941.8	2	5	2	2	5	5	6	704717	982557	234017	651051	362924	754977	2.26164e+06	Q64362	Aktip	32941.8		32941.8	Aktip	1132.58	1695.7	439.499	1101.81	439.529	951.484	2532.03	Aktip	8.30227	10.1157	2.6103	8.49046	5.89287	12.0331	29.0732	Q64362	Aktip	3	4	1307.68	1092.4	-0.259512	0.0232297	0.316054
P10518	Alad	Delta-aminolevulinic acid dehydratase	HEM2_MOUSE	36023.5	14	17	15	13	16	16	16	30795268	41067796	36340208	27579936	26795080	23998048	35813052	P10518	Alad	36023.5		36023.5	Alad	45258.5	64811.8	62410.7	42682.1	29674.8	27657	36664.7	Alad	331.763	386.636	370.674	328.905	397.857	349.769	420.991	P10518	Alad	3	4	31332.2	53790.8	0.779714	1.82685	1.91188
Q8VC19	Alas1	5-aminolevulinate synthase, non-specific, mitochondrial	HEM1_MOUSE	71017.5	3	5	7	9	0	0	0	2.25739e+06	2.5585e+06	3.08449e+06	3.38567e+06	NaN	NaN	NaN	Q8VC19	Alas1	71017.5		71017.5	Alas1	1682.84	2048.14	2687.05	2657.77				Alas1	12.3359	12.2182	15.9591	20.4806				Q8VC19	Alas1		4		2268.95				up-a
P07724	Alb	Albumin	ALBU_MOUSE	68692.5	22	23	20	23	34	33	32	580341696	626568896	439582688	291099424	634115904	501191936	728635776	P07724	Alb	68692.5		68692.5	Alb	447277	518560	395904	236249	368280	302907	391196	Alb	3278.72	3093.48	2351.38	1820.52	4937.62	3830.77	4491.79	P07724	Alb	3	4	354128	399497	0.173915	0.154094	0.429314
Q61490	Alcam	CD166 antigen	CD166_MOUSE	65092.1	9	10	12	10	7	10	10	4771292	4.84712e+06	5920568	3.4677e+06	1.60308e+06	2.23125e+06	3.16113e+06	Q61490	Alcam	65092.1		65092.1	Alcam	3880.7	4233.45	5627.21	2969.97	982.529	1423.1	1791.05	Alcam	28.4471	25.2547	33.4215	22.8864	13.173	17.9974	20.5652	Q61490	Alcam	3	4	1398.89	4177.83	1.57847	2.4368	2.40272
Q571I9	Aldh16a1	A16Aldehyde dehydrogenase family 16 member A1	A16A1_MO	84755.8	18	19	19	19	19	20	20	28995988	35847556	37868464	32724158	26552916	23729246	30323912	Q571I9	Aldh16a1	84755.8		84755.8	Aldh16a1	18112.2	24045.3	27641.8	21524.7	12498.6	11623.3	13195	Aldh16a1	132.77	143.442	164.172	165.868	167.572	146.996	151.508	Q571I9	Aldh16a1	3	4	12439	22831	0.876126	2.53881	2.47969
Q9Z110	Aldh18a1	Delta-1-pyrroline-5-carboxylate synthase	P5CS_MOUSE	87266.3	43	41	46	47	42	42	40	101534008	130437752	117158328	87742680	28123420	29746734	38292364	Q9Z110	Aldh18a1	87266.3		87266.3	Aldh18a1	61598.1	84976	83058.7	56053.5	12857	14151.7	16183	Aldh18a1	451.538	506.925	493.308	431.945	172.377	178.972	185.816	Q9Z110	Aldh18a1	3	4	14397.2	71421.6	2.31057	4.08948	3.40533	up
Q9CZS1	Aldh1b1	AL1Aldehyde dehydrogenase X, mitochondrial	AL1B1_MO	57552.9	15	15	16	14	16	14	14	14615051	13800626	9460342	8.34385e+06	6714623	5218049	6.64232e+06	Q9CZS1	Aldh1b1	57552.9		57552.9	Aldh1b1	13444.2	13632.4	10169.5	8082.35	4654.5	3764.06	4256.44	Aldh1b1	98.5514	81.324	60.3991	62.2821	62.4041	47.6028	48.8732	Q9CZS1	Aldh1b1	3	4	4225	11332.1	1.42339	2.79234	2.66732
Q8K009	Aldh1l2	AL1Mitochondrial 10-formyltetrahydrofolate dehydrogenase	AL1L2_MO	101590	14	0	6	0	0	0	0	4.73217e+06	NaN	1.23743e+06	NaN	NaN	NaN	NaN	Q8K009	Aldh1l2	101590		101590	Aldh1l2	2466.1		753.575					Aldh1l2	18.0775		4.47568					Q8K009	Aldh1l2		2		1609.84
P47738	Aldh2	Aldehyde dehydrogenase, mitochondrial	ALDH2_MOUSE	56537.5	26	26	27	27	36	36	37	299675776	336590752	302274688	259310368	479692448	474424768	629316480	P47738	Aldh2	56537.5		56537.5	Aldh2	280619	338458	330768	255695	338489	348374	410512	Aldh2	2057.05	2019.08	1964.52	1970.37	4538.21	4405.77	4713.58	P47738	Aldh2	3	4	365792	301385	-0.279416	1.04293	1.2256
P47740	Aldh3a2	AL3Aldehyde dehydrogenase family 3 member A2	AL3A2_MO	53970.8	18	18	20	20	27	26	27	31709614	34726252	30827128	32335696	41660204	41154928	46271472	P47740	Aldh3a2	53970.8		53970.8	Aldh3a2	31105.3	36579.6	35337.3	33401.2	30795.1	31657.6	31619	Aldh3a2	228.014	218.216	209.877	257.387	412.878	400.364	363.056	P47740	Aldh3a2	3	4	31357.3	34105.8	0.121219	0.953136	1.14636
Q80VQ0	Aldh3b1	AL3Aldehyde dehydrogenase family 3 member B1	AL3B1_MO	52292.2	7	6	6	6	8	9	9	1.54578e+06	1.39192e+06	1.23832e+06	1135466	1733221	2.39604e+06	2.65392e+06	Q80VQ0	Aldh3b1	52292.2		52292.2	Aldh3b1	1565	1513.27	1465.05	1210.53	1322.32	1902.27	1871.74	Aldh3b1	11.4721	9.02745	8.70135	9.32828	17.7287	24.0574	21.4916	Q80VQ0	Aldh3b1	3	4	1698.78	1438.46	-0.239966	0.607171	0.835433
Q8CHT0	Aldh4a1	AL4Delta-1-pyrroline-5-carboxylate dehydrogenase, mitochondrial	AL4A1_MO	61840.6	19	18	15	15	20	20	20	15137475	19675082	18567658	18239920	34057236	38440936	46929812	Q8CHT0	Aldh4a1	61840.6		61840.6	Aldh4a1	12959.3	18087.7	18575.6	16443.3	21971.3	25806.9	27987.8	Aldh4a1	94.997	107.902	110.325	126.711	294.574	326.371	321.361	Q8CHT0	Aldh4a1	3	4	25255.3	16516.5	-0.612684	1.88744	1.96333
Q8BWF0	Aldh5a1	Succinate-semialdehyde dehydrogenase, mitochondrial	SSDH_MOUSE	55968.2	2	0	0	0	0	0	0	238002	NaN	NaN	NaN	NaN	NaN	NaN	Q8BWF0	Aldh5a1	55968.2		55968.2	Aldh5a1	225.135							Aldh5a1	1.65033							Q8BWF0	Aldh5a1		1		225.135
Q9EQ20	Aldh6a1	Methylmalonate-semialdehyde/malonate-semialdehyde dehydrogenase [acylating], mitochondrial	MMSA_MOUSE	57915.6	16	15	16	14	15	19	16	15685037	13793381	12035494	9241983	5753223	7198026	8589150	Q9EQ20	Aldh6a1	57915.6		57915.6	Aldh6a1	14338.1	13539.9	12856.6	8896.27	3963.1	5159.8	5469.51	Aldh6a1	105.104	80.7723	76.3588	68.5541	53.1342	65.2543	62.8019	Q9EQ20	Aldh6a1	3	4	4864.13	12407.7	1.35098	2.76948	2.6502
Q9DBF1-2	Aldh7a1	AL7Isoform 2 of Alpha-aminoadipic semialdehyde dehydrogenase	AL7A1_MO	55644.7	10	9	10	10	10	7	8	4868376	3414565	3.9301e+06	3.2331e+06	1.81823e+06	1.42207e+06	1.71314e+06	Q9DBF1	Aldh7a1	55644.7		55644.7	Aldh7a1	4631.94	3488.6	4369.56	3239.17	1303.6	1060.99	1135.44	Aldh7a1	33.9539	20.8113	25.952	24.9609	17.4777	13.418	13.0373	Q9DBF1	Aldh7a1	3	4	1166.68	3932.32	1.75298	3.88746	3.32744
Q9JLJ2	Aldh9a1	AL94-trimethylaminobutyraldehyde dehydrogenase	AL9A1_MO	53514.7	26	25	26	23	32	29	34	103412584	117588872	116842728	99537192	106420168	111497656	135441024	Q9JLJ2	Aldh9a1	53514.7		53514.7	Aldh9a1	102306	124920	135079	103693	79335.9	86498.3	93340.6	Aldh9a1	749.946	745.213	802.268	799.054	1063.68	1093.92	1071.75	Q9JLJ2	Aldh9a1	3	4	86391.6	116500	0.431362	1.64331	1.75603
P05064	Aldoa	Fructose-bisphosphate aldolase A	ALDOA_MOUSE	39355.9	37	38	37	37	40	41	42	1167751296	1419261952	1256426752	1046541056	715795968	759586944	972219776	P05064	Aldoa	39355.9		39355.9	Aldoa	1.57088e+06	2.05018e+06	1.97508e+06	1.48247e+06	725601	801277	911062	Aldoa	11515.2	12230.4	11730.5	11423.8	9728.32	10133.5	10461	P05064	Aldoa	3	4	812647	1.76965e+06	1.12276	3.03336	2.83782
P05063	Aldoc	Fructose-bisphosphate aldolase C	ALDOC_MOUSE	39394.9	12	12	14	12	19	19	19	21016654	30371188	30191618	22753218	15587373	20318994	24088606	P05063	Aldoc	39394.9		39394.9	Aldoc	28244	43829	47413.8	32198.9	15785.3	21413	22551	Aldoc	207.04	261.462	281.603	248.123	211.637	270.803	258.935	P05063	Aldoc	3	4	19916.4	37921.4	0.929055	1.83578	1.91933
Q921Q3	Alg1	Chitobiosyldiphosphodolichol beta-mannosyltransferase	ALG1_MOUSE	54417.4	8	9	9	10	8	9	9	3.28133e+06	3.6932e+06	4.79449e+06	4783241	2.646e+06	2205837	2.94543e+06	Q921Q3	Alg1	54417.4		54417.4	Alg1	3192.37	3858.37	5450.83	4900.3	1939.87	1682.87	1996.2	Alg1	23.4014	23.0172	32.3739	37.7614	26.0083	21.2827	22.9208	Q921Q3	Alg1	3	4	1872.98	4350.47	1.21584	2.578	2.5096
Q3UGP8	Alg10b	Putative Dol-P-Glc:Glc(2)Man(9)GlcNAc(2)-PP-Dol alpha-1,2-glucosyltransferase	AG10B_MOUSE	55464.9	6	4	6	6	6	7	8	5.11469e+06	2508020	4453091	4015989	2.06103e+06	2.38185e+06	5.03783e+06	Q3UGP8	Alg10b	55464.9		55464.9	Alg10b	4882.07	2570.71	4967.09	4036.57	1482.47	1782.84	3349.8	Alg10b	35.7875	15.3356	29.5009	31.1056	19.8758	22.5469	38.4631	Q3UGP8	Alg10b	3	4	2205.04	4114.11	0.899777	1.20129	1.36902
Q3TZM9	Alg11	GDP-Man:Man(3)GlcNAc(2)-PP-Dol alpha-1,2-mannosyltransferase	ALG11_MOUSE	55270.1	9	9	8	7	7	7	7	7.22648e+06	9320169	8.09297e+06	2412570	1.89123e+06	1.93016e+06	2.88114e+06	Q3TZM9	Alg11	55270.1		55270.1	Alg11	6922.11	9586.78	9058.91	2433.48	1365.12	1449.83	1922.5	Alg11	50.7418	57.1901	53.8033	18.7522	18.3026	18.3356	22.0746	Q3TZM9	Alg11	3	4	1579.15	7000.32	2.14827	1.78647	1.87863
Q8VDB2	Alg12	Dol-P-Man:Man(7)GlcNAc(2)-PP-Dol alpha-1,6-mannosyltransferase	ALG12_MOUSE	54543.4	3	3	3	2	4	3	3	1.08262e+06	1.21396e+06	888316	783528	703224	559063	1.06601e+06	Q8VDB2	Alg12	54543.4		54543.4	Alg12	1050.84	1265.32	1007.59	800.849	514.364	425.533	720.797	Alg12	7.7031	7.54831	5.98434	6.17129	6.8962	5.38158	8.27632	Q8VDB2	Alg12	3	4	553.565	1031.15	0.897433	1.86224	1.94233
Q9D8C3;Q9D8C3-2	Alg13	Putative bifunctional UDP-N-acetylglucosamine transferase and deubiquitinase ALG13;Isoform 2 of Putative bifunctional UDP-N-acetylglucosamine transferase and deubiquitinase ALG13	ALG13_MOUSE	128663.78;128663.78-2	2	1	0	0	0	1	0	528956	71887.9	NaN	NaN	NaN	187942	NaN	Q9D8C3	Alg13	128664		128664	Alg13	217.654	31.7643				60.6432		Alg13	1.59549	0.18949				0.766935		Q9D8C3	Alg13	1	2	60.6432	124.709	1.04015	0.055094	0.343384
Q9D081	Alg14	UDP-N-acetylglucosamine transferase subunit ALG14 homolog	ALG14_MOUSE	24428.8	0	2	2	0	1	1	1	NaN	99559.8	492293	NaN	266029	236783	280773	Q9D081	Alg14	24428.8		24428.8	Alg14		231.697	1246.75		434.456	402.405	423.884	Alg14		1.38219	7.40479		5.82487	5.08908	4.86712	Q9D081	Alg14	3	2	420.249	739.224	0.814769	0.142179	0.419109
Q9DBE8	Alg2	Alpha-1,3/1,6-mannosyltransferase ALG2	ALG2_MOUSE	47404.9	16	18	19	19	15	16	15	11989944	11217931	9416135	8930903	5838708	6.0511e+06	7688285	Q9DBE8	Alg2	47404.9		47404.9	Alg2	13390.5	13453.3	12288.7	10502.9	4913.74	5299.39	5981.35	Alg2	98.1575	80.2558	72.9861	80.9348	65.8797	67.0196	68.679	Q9DBE8	Alg2	3	4	5398.16	12408.9	1.20083	3.75577	3.26406
Q8K2A8	Alg3	Dol-P-Man:Man(5)GlcNAc(2)-PP-Dol alpha-1,3-mannosyltransferase	ALG3_MOUSE	50185.5	4	4	4	4	4	4	4	2.5467e+06	3.17568e+06	2.31044e+06	2.00657e+06	972400	827889	1.07272e+06	Q8K2A8	Alg3	50185.5		50185.5	Alg3	2686.59	3597.48	2848.22	2229.02	773.011	684.872	788.319	Alg3	19.6938	21.4608	16.9164	17.1767	10.3639	8.66134	9.05162	Q8K2A8	Alg3	3	4	748.734	2840.33	1.92353	3.92551	3.33941
Q9DB25	Alg5	Dolichyl-phosphate beta-glucosyltransferase	ALG5_MOUSE	36790.9	14	13	11	11	12	13	12	16317939	16400205	13392966	12257223	10200367	9047627	12313034	Q9DB25	Alg5	36790.9		36790.9	Alg5	23481.6	25342.4	22521.4	18573.3	11061	10209.6	12342.9	Alg5	172.129	151.181	133.76	143.125	148.298	129.118	141.724	Q9DB25	Alg5	3	4	11204.5	22479.7	1.00454	3.21112	2.9492
Q6P8H8	Alg8	Probable dolichyl pyrophosphate Glc1Man9GlcNAc2 alpha-1,3-glucosyltransferase	ALG8_MOUSE	59534.7	6	6	5	3	4	5	5	4664001	5.57563e+06	4676771	2.7732e+06	1.22128e+06	1.53247e+06	1.89223e+06	Q6P8H8	Alg8	59534.7		59534.7	Alg8	4147.54	5324.31	4859.98	2596.87	818.401	1068.65	1172.19	Alg8	30.4031	31.7622	28.8647	20.0113	10.9725	13.5149	13.4593	Q6P8H8	Alg8	3	4	1019.75	4232.17	2.05319	2.94629	2.77439
Q8VDI9	Alg9	Alpha-1,2-mannosyltransferase ALG9	ALG9_MOUSE	69561	13	12	10	9	12	11	11	4.73966e+06	4360861	3.90526e+06	2456368	2.84734e+06	2410710	3.08424e+06	Q8VDI9	Alg9	69561		69561	Alg9	3607.31	3564.07	3473.3	1968.64	1633.03	1438.78	1635.22	Alg9	26.443	21.2615	20.6288	15.1702	21.8944	18.1958	18.7759	Q8VDI9	Alg9	3	4	1569.01	3153.33	1.00702	1.88319	1.95988
P0CB42	Alkbh1	Nucleic acid dioxygenase ALKBH1	ALKB1_MOUSE	43746.1	1	2	0	0	0	0	0	45404.9	173099	NaN	NaN	NaN	NaN	NaN	P0CB42	Alkbh1	43746.1		43746.1	Alkbh1	54.9497	224.955						Alkbh1	0.402803	1.34197						P0CB42	Alkbh1		2		139.952
Q6P6J4	Alkbh2	DNA oxidative demethylase ALKBH2	ALKB2_MOUSE	27129.1	1	0	0	0	0	0	0	166975	NaN	NaN	NaN	NaN	NaN	NaN	Q6P6J4	Alkbh2	27129.1		27129.1	Alkbh2	325.852							Alkbh2	2.38862							Q6P6J4	Alkbh2		1		325.852
Q8K1E6	Alkbh3	Alpha-ketoglutarate-dependent dioxygenase alkB homolog 3	ALKB3_MOUSE	33061.3	9	10	10	10	9	10	9	3.55121e+06	3900709	4018521	3.23082e+06	1.63304e+06	1.85395e+06	2.26631e+06	Q8K1E6	Alkbh3	33061.3		33061.3	Alkbh3	5686.67	6707.53	7519.77	5447.92	1970.59	2328.06	2528.1	Alkbh3	41.6856	40.0139	44.6619	41.9813	26.4202	29.4421	29.0281	Q8K1E6	Alkbh3	3	4	2275.58	6340.47	1.47836	3.66114	3.21452
Q9D8F1	Alkbh4	Alpha-ketoglutarate-dependent dioxygenase alkB homolog 4	ALKB4_MOUSE	33394.4	0	3	3	0	6	5	0	NaN	415434	542821	NaN	714617	457118	NaN	Q9D8F1	Alkbh4	33394.4		33394.4	Alkbh4		707.243	1005.64		853.727	568.29		Alkbh4		4.21907	5.97275		11.4461	7.18697		Q9D8F1	Alkbh4	2	2	711.009	856.44	0.268485	0.258936	0.522771
Q3TSG4	Alkbh5	RNA demethylase ALKBH5	ALKB5_MOUSE	44411	13	17	15	15	20	22	20	8954118	10976533	9163981	7778190	8543211	8.36744e+06	10765008	Q3TSG4	Alkbh5	44411		44411	Alkbh5	10674.2	14051.2	12765.9	9763.97	7674.49	7821.99	8939.58	Alkbh5	78.2459	83.8227	75.8201	75.2405	102.894	98.9221	102.646	Q3TSG4	Alkbh5	3	4	8145.35	11813.8	0.536426	1.73278	1.83241
Q8K2U2	Alkbh6	Alpha-ketoglutarate-dependent dioxygenase alkB homolog 6	ALKB6_MOUSE	26775.8	6	6	7	8	3	4	2	3.41867e+06	4199950	3.71843e+06	3.36449e+06	670531	893080	805143	Q8K2U2	Alkbh6	26775.8		26775.8	Alkbh6	6759.53	8917.44	8591.61	7005.11	999.067	1384.72	1108.98	Alkbh6	49.55	53.1971	51.0279	53.9809	13.3947	17.5121	12.7335	Q8K2U2	Alkbh6	3	4	1164.26	7818.42	2.74747	4.82252	3.54164	up
Q9D6Z0	Alkbh7	Alpha-ketoglutarate-dependent dioxygenase alkB homolog 7, mitochondrial	ALKB7_MOUSE	24970.4	4	6	6	5	3	3	2	780137	1.27606e+06	1.49682e+06	1.16013e+06	266156	287105	284661	Q9D6Z0	Alkbh7	24970.4		24970.4	Alkbh7	1654.05	2905.25	3708.53	2590.13	425.237	477.343	420.433	Alkbh7	12.1248	17.3313	22.0259	19.9594	5.70125	6.03679	4.82749	Q9D6Z0	Alkbh7	3	4	441.004	2714.49	2.62182	3.4942	3.11985	up
Q80Y20;Q80Y20-2	Alkbh8	Alkylated DNA repair protein alkB homolog 8;Isoform 2 of Alkylated DNA repair protein alkB homolog 8	ALKB8_MOUSE	74767.55;74767.55-2	3	4	4	3	0	0	0	372074	734317	578319	274650	NaN	NaN	NaN	Q80Y20	Alkbh8	74767.6		74767.6	Alkbh8	263.462	558.354	478.533	204.788				Alkbh8	1.93128	3.33087	2.84214	1.57808				Q80Y20	Alkbh8		4		376.284				up-a
P48999	Alox5	Polyunsaturated fatty acid 5-lipoxygenase	LOX5_MOUSE	77967.2	0	0	0	0	1	1	1	NaN	NaN	NaN	NaN	11163641	13572836	17764708	P48999	Alox5	77967.2		77967.2	Alox5					5712.32	7227.26	8403.1	Alox5					76.5865	91.4007	96.486	P48999	Alox5	3		7114.23					down-a
P09242	Alpl	Alkaline phosphatase, tissue-nonspecific isozyme	PPBT_MOUSE	57514.2	11	13	13	12	0	0	0	3422004	5.04385e+06	4844374	2803843	NaN	NaN	NaN	P09242	Alpl	57514.2		57514.2	Alpl	3149.98	4985.71	5211	2717.8				Alpl	23.0906	29.7423	30.9495	20.9432				P09242	Alpl		4		4016.12				up-a
Q920R0	Als2	Alsin	ALS2_MOUSE	182566	6	9	8	7	6	7	4	1.31884e+06	2.92906e+06	2.72503e+06	2.14409e+06	1.13192e+06	1.09226e+06	756697	Q920R0	Als2	182566		182566	Als2	382.45	912.11	923.44	654.729	247.352	248.382	152.86	Als2	2.80351	5.4412	5.48456	5.04529	3.31631	3.14121	1.75517	Q920R0	Als2	3	4	216.198	718.182	1.732	2.06241	2.10706
O08583	Alyref	THO complex subunit 4	THOC4_MOUSE	26940	13	14	15	14	17	17	17	164561728	211248096	156499728	149894640	203231536	200362560	268932576	O08583	Alyref	26940		26940	Alyref	323395	445795	359397	310190	300963	308770	368163	Alyref	2370.62	2659.39	2134.56	2390.3	4035.08	3904.91	4227.31	O08583	Alyref	3	4	325965	359694	0.142054	0.358805	0.612019
Q9JJW6	Alyref2	Aly/REF export factor 2	ALRF2_MOUSE	23730.5	2	0	2	0	1	2	2	505914	NaN	401859	NaN	107735	209482	268598	Q9JJW6	Alyref2	23730.5		23730.5	Alyref2	1128.68		1047.67		181.122	366.485	417.436	Alyref2	8.2737		6.22241		2.42835	4.63481	4.79308	Q9JJW6	Alyref2	3	2	321.681	1088.18	1.75821	1.49691	1.63047
O09174	Amacr	Alpha-methylacyl-CoA racemase	AMACR_MOUSE	41704	8	7	7	8	9	9	10	2.53293e+06	1948134	1.85843e+06	1971586	1.68273e+06	1.94113e+06	2970616	O09174	Amacr	41704		41704	Amacr	3215.49	2655.71	2756.94	2635.58	1609.74	1932.38	2627.01	Amacr	23.5708	15.8427	16.3742	20.3096	21.5822	24.4381	30.1639	O09174	Amacr	3	4	2056.38	2815.93	0.453506	1.27525	1.4351
A2AH22;A2AH22-2;A2AH22-7	Ambra1	Activating molecule in BECN1-regulated autophagy protein 1;Isoform 2 of Activating molecule in BECN1-regulated autophagy protein 1;Isoform 7 of Activating molecule in BECN1-regulated autophagy protein 1	AMRA1_MOUSE	142878.51;142878.51-2;142878.51-7	17	21	22	15	0	5	8	6264360	8506198	6.8094e+06	4.47223e+06	NaN	2.68886e+06	3.2973e+06	A2AH22	Ambra1	142879		142879	Ambra1	2321.2	3384.6	2948.49	1745		781.298	851.11	Ambra1	17.0153	20.1909	17.5119	13.4469		9.88081	9.77261	A2AH22	Ambra1	2	4	816.204	2599.82	1.67141	2.16834	2.19057
D3Z6H8;P0DMN7	Amd2;Amd1	S-adenosylmethionine decarboxylase proenzyme 2;S-adenosylmethionine decarboxylase proenzyme 1	DCAM2_MOUSE;DCAM1_MOUSE	38294.54;38272.49	3	2	2	0	0	0	0	644449	440003	453703	NaN	NaN	NaN	NaN	D3Z6H8	Amd2	38294.5		38294.5	Amd2	890.951	653.219	732.981					Amd2	6.53103	3.89679	4.35337					D3Z6H8	Amd2		3		759.05
Q8JZV7	Amdhd2	N-acetylglucosamine-6-phosphate deacetylase	NAGA_MOUSE	43500.6	10	11	10	11	13	14	12	6.48174e+06	9807733	8655651	7.56813e+06	9313520	8673478	10256053	Q8JZV7	Amdhd2	43500.6		43500.6	Amdhd2	7888.58	12817.8	12310.1	9699.1	8541.56	8277.76	8695.18	Amdhd2	57.8264	76.4646	73.1131	74.7406	114.519	104.686	99.8396	Q8JZV7	Amdhd2	3	4	8504.83	10678.9	0.328407	0.74546	0.960297
Q9R049-2	Amfr	Isoform 2 of E3 ubiquitin-protein ligase AMFR	AMFR_MOUSE	72752.8	13	14	15	15	10	12	9	5.58413e+06	6488628	7.53292e+06	5.87096e+06	1.27344e+06	1.45349e+06	1362194	Q9R049	Amfr	72752.8		72752.8	Amfr	4063.57	5070.41	6405.79	4498.81	698.308	829.425	690.531	Amfr	29.7876	30.2476	38.0457	34.6676	9.36239	10.4895	7.92881	Q9R049	Amfr	3	4	739.422	5009.64	2.76024	4.63531	3.52857	up
Q9JHT5	Ammecr1	Nuclear protein AMMECR1	AMMR1_MOUSE	36030.6	4	8	7	9	3	3	3	1232209	3737483	3.88017e+06	2847331	735037	651928	728180	Q9JHT5	Ammecr1	36030.6		36030.6	Ammecr1	1810.57	5897.22	6662.51	4405.6	813.874	751.179	745.352	Ammecr1	13.2722	35.18	39.5704	33.9493	10.9118	9.49991	8.55827	Q9JHT5	Ammecr1	3	4	770.135	4693.98	2.60763	2.33786	2.32487	up
Q8JZZ6	Ammecr1l	AMMECR1-like protein	AMERL_MOUSE	34516.2	5	4	6	3	2	0	3	945082	1.1526e+06	1.28656e+06	573793	240235	NaN	510713	Q8JZZ6	Ammecr1l	34516.2		34516.2	Ammecr1l	1449.6	1898.42	2306.03	926.767	277.672		545.692	Ammecr1l	10.6261	11.3251	13.6961	7.1416	3.72281		6.26573	Q8JZZ6	Ammecr1l	2	4	411.682	1645.21	1.99867	1.73294	1.83241
Q9DBT5;Q9DBT5-1	Ampd2	AMP deaminase 2;Isoform 1 of AMP deaminase 2	AMPD2_MOUSE	94696;94696-1	24	27	24	27	14	20	18	16486452	21773132	21743888	16635143	2.90961e+06	7.54849e+06	5.63145e+06	Q9DBT5	Ampd2	94696		94696	Ampd2	9217.18	13071.6	14205.7	9793.4	1225.81	3309.36	2193.22	Ampd2	67.5655	77.9788	84.3717	75.4673	16.4347	41.8523	25.183	Q9DBT5	Ampd2	3	4	2242.8	11572	2.36727	2.8182	2.68674	up
O08739	Ampd3	AMP deaminase 3	AMPD3_MOUSE	88652.3	10	10	9	11	19	19	18	1.53052e+06	1797225	1.37777e+06	1.49368e+06	3.89926e+06	3.77119e+06	4654642	O08739	Ampd3	88652.3		88652.3	Ampd3	914.013	1152.53	961.489	939.306	1754.73	1766.05	1936.38	Ampd3	6.70008	6.87543	5.71054	7.23823	23.5261	22.3347	22.2339	O08739	Ampd3	3	4	1819.06	991.834	-0.875018	3.55375	3.1521	down
P00687	Amy1	Alpha-amylase 1	AMY1_MOUSE	57643.7	14	9	14	11	3	19	1	12063571	3318140	8687822	4711877	284188	5351683	626320	P00687	Amy1	57643.7		57643.7	Amy1	11079.7	3272.52	9324.32	4557.02	196.686	3854.37	400.718	Amy1	81.2183	19.5223	55.3797	35.1161	2.63701	48.745	4.60111	P00687	Amy1	3	4	1483.93	7058.38	2.24992	1.37161	1.52014
P53995	Anapc1	Anaphase-promoting complex subunit 1	APC1_MOUSE	215994	52	53	49	46	50	52	48	26802782	31300560	26392766	19209610	14121835	13632145	14062864	P53995	Anapc1	215994		215994	Anapc1	6569.63	8238.54	7559.66	4958.11	2608.37	2620.22	2401.19	Anapc1	48.158	49.1472	44.8988	38.2069	34.9711	33.1371	27.5709	P53995	Anapc1	3	4	2543.26	6831.49	1.42552	3.11221	2.88937
Q8K2H6	Anapc10	Anaphase-promoting complex subunit 10	APC10_MOUSE	21266.2	3	3	5	3	2	2	3	998658	1.2339e+06	3.6305e+06	942151	161973	160785	678471	Q8K2H6	Anapc10	21266.2		21266.2	Anapc10	2486.17	3298.6	10561.8	2469.85	303.86	313.887	1176.62	Anapc10	18.2246	19.6779	62.7291	19.0325	4.07392	3.96962	13.5102	Q8K2H6	Anapc10	3	4	598.122	4704.09	2.97541	1.87291	1.95111
Q9CPX9	Anapc11	Anaphase-promoting complex subunit 11	APC11_MOUSE	9817.55	1	2	2	2	2	2	2	120922	308403	405895	259968	230492	185687	249682	Q9CPX9	Anapc11	9817.55		9817.55	Anapc11	652.088	1785.89	2557.81	1476.23	936.637	785.223	937.944	Anapc11	4.78006	10.6538	15.1915	11.3757	12.5577	9.93045	10.7697	Q9CPX9	Anapc11	3	4	886.601	1618.01	0.86786	0.672497	0.894568
Q8BZQ7	Anapc2	Anaphase-promoting complex subunit 2	ANC2_MOUSE	95307	26	23	24	25	24	21	21	16196565	15663495	14922892	12430578	5805787	5018253	6.99806e+06	Q8BZQ7	Anapc2	95307		95307	Anapc2	8997.06	9343.37	9686.94	7271.18	2430.28	2185.96	2707.99	Anapc2	65.952	55.738	57.5333	56.0313	32.5833	27.6452	31.0936	Q8BZQ7	Anapc2	3	4	2441.41	8824.64	1.85382	4.46633	3.50698
Q91W96	Anapc4	Anaphase-promoting complex subunit 4	APC4_MOUSE	91707.8	18	19	20	19	20	19	19	10994772	11581360	12054901	10072725	5177618	5119090	6826243	Q91W96	Anapc4	91707.8		91707.8	Anapc4	6347.2	7179.47	8132.34	6123.21	2252.39	2317.4	2745.17	Anapc4	46.5275	42.8293	48.3002	47.185	30.1983	29.3074	31.5205	Q91W96	Anapc4	3	4	2438.32	6945.56	1.5102	4.03026	3.38258
Q8BTZ4	Anapc5	Anaphase-promoting complex subunit 5	APC5_MOUSE	83097.6	27	29	31	28	28	28	28	15054403	16527835	17241716	11923166	6322262	6.82944e+06	8815192	Q8BTZ4	Anapc5	83097.6		83097.6	Anapc5	9591.29	11307.5	12836.6	7999.1	3035.31	3412.02	3912.34	Anapc5	70.308	67.4551	76.24	61.6406	40.6951	43.1507	44.9222	Q8BTZ4	Anapc5	3	4	3453.22	10433.6	1.59522	3.32208	3.01576
Q9WVM3	Anapc7	Anaphase-promoting complex subunit 7	APC7_MOUSE	63021	25	27	26	25	20	20	22	14261094	16914424	14779542	12543338	7.03628e+06	5740219	7854053	Q9WVM3	Anapc7	63021		63021	Anapc7	11980.4	15258.5	14508.9	11096	4454.27	3781.45	4596.24	Anapc7	87.8208	91.0247	86.1721	85.505	59.7195	47.8227	52.7748	Q9WVM3	Anapc7	3	4	4277.32	13210.9	1.62695	3.94412	3.34848
Q8K1C0;Q8K1C0-2	Angel2	Protein angel homolog 2;Isoform 2 of Protein angel homolog 2	ANGE2_MOUSE	62412.86;62412.86-2	18	19	18	15	23	23	23	6996998	7.93681e+06	6863152	6.0305e+06	6772246	6649620	9422295	Q8K1C0	Angel2	62412.9		62412.9	Angel2	5935.26	7229.55	6803.12	5386.63	4328.9	4423.21	5567.71	Angel2	43.5078	43.128	40.4055	41.5091	58.0387	55.9389	63.9294	Q8K1C0	Angel2	3	4	4773.27	6338.64	0.409194	1.38978	1.53556
Q810B6	Ankfy1	Rabankyrin-5	ANFY1_MOUSE	128653	46	46	47	43	55	56	53	65607040	80781680	68870192	62027592	53658536	63627552	78293184	Q810B6	Ankfy1	128653		128653	Ankfy1	26998.2	35697.2	33118.5	26878.5	16639.5	20532.5	22444	Ankfy1	197.907	212.952	196.7	207.124	223.09	259.668	257.706	Q810B6	Ankfy1	3	4	19872	30673.1	0.626238	1.91539	1.98693
E9PUR0;E9Q1M6	Ankhd1	E9Ankyrin repeat and KH domain containing 1;E9Q1Ankyrin repeat and KH domain containing 1	E9PUR0_MOU;E9Q1M6_M	269677.12;263406.96	53	53	56	52	51	51	50	43079404	52420296	54285020	40643088	16573527	17733062	22810836	E9PUR0	Ankhd1	269677		269677	Ankhd1	8457.22	11050.8	12453.6	8401.97	2451.83	2729.95	3119.54	Ankhd1	61.9948	65.9239	73.9651	64.745	32.8723	34.5248	35.8192	E9PUR0	Ankhd1	3	4	2767.11	10090.9	1.8666	3.73673	3.2519
Q6ZPS6	Ankib1	Ankyrin repeat and IBR domain-containing protein 1	AKIB1_MOUSE	121876	10	11	10	12	7	9	9	1.45482e+06	2.51218e+06	1.62587e+06	1.62859e+06	501484	883513	902335	Q6ZPS6	Ankib1	121876		121876	Ankib1	631.969	1171.86	825.327	744.963	164.157	300.962	273.052	Ankib1	4.63259	6.99073	4.90184	5.74063	2.2009	3.80616	3.13523	Q6ZPS6	Ankib1	3	4	246.057	843.529	1.77745	2.60707	2.53246
Q6P1H6	Ankle2	Ankyrin repeat and LEM domain-containing protein 2	ANKL2_MOUSE	106198	40	40	43	39	34	34	32	28278852	31611528	28416650	22977092	8801910	9351564	11958224	Q6P1H6	Ankle2	106198		106198	Ankle2	14097.7	16922.6	16554.4	12061.9	3306.58	3655.8	4152.82	Ankle2	103.341	100.952	98.3211	92.9483	44.3321	46.2337	47.6835	Q6P1H6	Ankle2	3	4	3705.07	14909.2	2.00863	4.28487	3.47457
Q3TPE9	Ankmy2	Ankyrin repeat and MYND domain-containing protein 2	ANKY2_MOUSE	48774	10	10	10	10	8	7	7	3570426	3.39143e+06	4.0922e+06	3147539	1.46869e+06	1.35057e+06	1.55906e+06	Q3TPE9	Ankmy2	48774		48774	Ankmy2	3875.55	3953.07	5190.71	3597.67	1201.32	1149.59	1178.87	Ankmy2	28.4093	23.5821	30.829	27.7234	16.1065	14.5385	13.5361	Q3TPE9	Ankmy2	3	4	1176.6	4154.25	1.81997	4.33591	3.4839
Q99LW0	Ankrd10	Ankyrin repeat domain-containing protein 10	ANR10_MOUSE	43975	6	6	7	7	5	6	4	2.33842e+06	3.2787e+06	3165192	2.22393e+06	1.26434e+06	1901983	2226300	Q99LW0	Ankrd10	43975		43975	Ankrd10	2815.26	4238.73	4452.99	2819.38	1147.03	1795.62	1867.12	Ankrd10	20.637	25.2862	26.4475	21.7259	15.3786	22.7087	21.4386	Q99LW0	Ankrd10	3	4	1603.26	3581.59	1.15959	2.01245	2.06576
E9Q4F7	Ankrd11	Ankyrin repeat domain-containing protein 11	ANR11_MOUSE	296186	16	19	18	15	17	20	17	2596489	4.11968e+06	3.74118e+06	1.75881e+06	2040466	4.19569e+06	3.29018e+06	E9Q4F7	Ankrd11	296186		296186	Ankrd11	464.113	790.748	781.451	331.05	274.842	588.104	409.683	Ankrd11	3.40213	4.71722	4.64125	2.55105	3.68488	7.43755	4.70406	E9Q4F7	Ankrd11	3	4	424.21	591.84	0.48043	0.448191	0.692704
Q80UP5	Ankrd13a	Ankyrin repeat domain-containing protein 13A	AN13A_MOUSE	67177.4	24	26	23	24	25	25	24	20225796	25143756	20301206	18941458	25281618	23288176	28797028	Q80UP5	Ankrd13a	67177.4		67177.4	Ankrd13a	15939.9	21278.8	18696.4	15719.1	15014.1	14392.2	15809.5	Ankrd13a	116.846	126.939	111.043	121.131	201.298	182.013	181.528	Q80UP5	Ankrd13a	3	4	15072	17908.5	0.24878	0.924621	1.12113
Q3UX43	Ankrd13c	Ankyrin repeat domain-containing protein 13C	AN13C_MOUSE	60149.6	0	0	1	1	0	0	0	NaN	NaN	174563	103731	NaN	NaN	NaN	Q3UX43	Ankrd13c	60149.6		60149.6	Ankrd13c			179.546	96.1424				Ankrd13c			1.06637	0.740867				Q3UX43	Ankrd13c		2		137.844
Q99NH0	Ankrd17	Ankyrin repeat domain-containing protein 17	ANR17_MOUSE	274213	34	35	39	34	19	22	21	14679030	19728850	17751886	13425122	1.73e+06	2.17443e+06	2927865	Q99NH0	Ankrd17	274213		274213	Ankrd17	2834.08	4090.28	4005.11	2729.41	251.697	329.21	393.783	Ankrd17	20.7749	24.4006	23.7874	21.0327	3.37456	4.16341	4.52149	Q99NH0	Ankrd17	3	4	324.897	3414.72	3.39371	4.46963	3.50698	up
Q3UMR0;Q3UMR0-2	Ankrd27	Ankyrin repeat domain-containing protein 27;Isoform 2 of Ankyrin repeat domain-containing protein 27	ANR27_MOUSE	116809.02;116809.02-2	7	5	6	7	6	10	7	792421	677263	574391	538753	454388	817245	660058	Q3UMR0	Ankrd27	116809		116809	Ankrd27	359.155	329.625	304.221	257.13	155.192	290.463	208.401	Ankrd27	2.63275	1.96638	1.80685	1.98142	2.0807	3.67339	2.3929	Q3UMR0	Ankrd27	3	4	218.019	312.533	0.519555	1.11488	1.29066
Q505D1	Ankrd28	Serine/threonine-protein phosphatase 6 regulatory ankyrin repeat subunit A	ANR28_MOUSE	112898	20	22	19	18	12	13	13	10204432	11743761	9927247	7.56911e+06	1736324	1.59933e+06	2.16053e+06	Q505D1	Ankrd28	112898		112898	Ankrd28	4785.27	5913.73	5440.04	3737.64	613.571	588.125	705.78	Ankrd28	35.0779	35.2784	32.3098	28.802	8.2263	7.43782	8.1039	Q505D1	Ankrd28	3	4	635.825	4969.17	2.9663	4.77249	3.53719	up
Q9D2X0	Ankrd39	Ankyrin repeat domain-containing protein 39	ANR39_MOUSE	19639.1	0	0	0	1	0	0	0	NaN	NaN	NaN	60554.3	NaN	NaN	NaN	Q9D2X0	Ankrd39	19639.1		19639.1	Ankrd39				171.894				Ankrd39				1.32461				Q9D2X0	Ankrd39		1		171.894
Q5SUE8;Q5SUE8-2;Q5SUE8-3	Ankrd40	Ankyrin repeat domain-containing protein 40;Isoform 2 of Ankyrin repeat domain-containing protein 40;Isoform 3 of Ankyrin repeat domain-containing protein 40	ANR40_MOUSE	40559.99;40559.99-2;40559.99-3	3	2	2	2	0	2	0	1249027	475364	436767	301942	NaN	193800	NaN	Q5SUE8	Ankrd40	40560		40560	Ankrd40	1630.33	666.297	666.208	415.015		198.368		Ankrd40	11.951	3.9748	3.95679	3.19808		2.50869		Q5SUE8	Ankrd40	1	4	198.368	844.463	2.08986	0.881264	1.08263
B2RXR6	Ankrd44	Serine/threonine-protein phosphatase 6 regulatory ankyrin repeat subunit B	ANR44_MOUSE	107385	43	44	44	43	49	46	48	51762676	62918680	55928984	50441136	61758160	62258292	79997080	B2RXR6	Ankrd44	107385		107385	Ankrd44	25519.7	33310	32221.9	26186.6	22944	24069.6	27474.1	Ankrd44	187.069	198.711	191.374	201.792	307.616	304.4	315.463	B2RXR6	Ankrd44	3	4	24829.2	29309.5	0.239331	0.844113	1.04943
Q8BTZ5	Ankrd46	Ankyrin repeat domain-containing protein 46	ANR46_MOUSE	25222.7	2	3	5	4	4	3	3	1.62026e+06	2.72431e+06	2.3421e+06	2019164	499298	307727	436944	Q8BTZ5	Ankrd46	25222.7		25222.7	Ankrd46	3400.92	6140.53	5744.77	4462.92	789.747	506.511	638.893	Ankrd46	24.9301	36.6314	34.1197	34.391	10.5883	6.40568	7.33589	Q8BTZ5	Ankrd46	3	4	645.051	4937.28	2.93623	3.87983	3.32382	up
Q8VE42	Ankrd49	Ankyrin repeat domain-containing protein 49	ANR49_MOUSE	27111.1	3	3	3	3	0	4	2	369607	415377	405553	375092	NaN	138336	118340	Q8VE42	Ankrd49	27111.1		27111.1	Ankrd49	721.763	871.033	925.461	771.309		211.838	160.982	Ankrd49	5.29081	5.19616	5.49656	5.94366		2.67904	1.84842	Q8VE42	Ankrd49	2	4	186.41	822.392	2.14135	3.62423	3.19402
F7BE84	Ankrd50	F7Ankyrin repeat domain 50 (Fragment)	F7BE84_MOU	150860	1	0	0	0	0	1	1	46181.4	NaN	NaN	NaN	NaN	63234.3	73430.7	F7BE84	Ankrd50	150860		150860	Ankrd50	16.2067					17.4018	17.9514	Ankrd50	0.118802					0.220075	0.206121	F7BE84	Ankrd50	2	1	17.6766	16.2067	-0.125245	0.717333	0.935368
Q8BTI7	Ankrd52	Serine/threonine-protein phosphatase 6 regulatory ankyrin repeat subunit C	ANR52_MOUSE	115032	26	25	29	25	3	3	2	6742154	8107405	8282117	6.62836e+06	226589	91033.8	124638	Q8BTI7	Ankrd52	115032		115032	Ankrd52	3103.01	4006.86	4454.33	3212.38	78.5852	32.8549	39.96	Ankrd52	22.7463	23.903	26.4554	24.7544	1.05361	0.415505	0.458828	Q8BTI7	Ankrd52	3	4	50.4667	3694.14	6.19376	4.99531	3.54164	up
Q91WK7	Ankrd54	Ankyrin repeat domain-containing protein 54	ANR54_MOUSE	32485.6	3	3	4	3	5	4	4	755850	1.22307e+06	1.21713e+06	926701	1.15687e+06	1.41108e+06	1.78226e+06	Q91WK7	Ankrd54	32485.6		32485.6	Ankrd54	1231.82	2140.43	2317.96	1590.33	1420.73	1803.34	2023.36	Ankrd54	9.02974	12.7688	13.767	12.255	19.0481	22.8062	23.2326	Q91WK7	Ankrd54	3	4	1749.14	1820.14	0.057398	0.0356725	0.326664
P59672;P59672-2	Anks1a	Ankyrin repeat and SAM domain-containing protein 1A;Isoform 2 of Ankyrin repeat and SAM domain-containing protein 1A	ANS1A_MOUSE	125242.31;125242.31-2	14	17	15	13	8	14	12	12836488	4801828	3506478	2.34539e+06	1.32855e+06	2.31058e+06	2.73455e+06	P59672	Anks1a	125242		125242	Anks1a	5426.22	2179.69	1732.12	1044	423.2	765.924	805.246	Anks1a	39.7763	13.003	10.2875	8.04502	5.67395	9.68638	9.24598	P59672	Anks1a	3	4	664.79	2595.51	1.96505	1.38907	1.53522
Q80UU1	Ankzf1	tRNA endonuclease ANKZF1	ANKZ1_MOUSE	82976.2	10	11	13	12	11	12	11	3071358	3821116	4054816	2.95548e+06	2.01741e+06	2.7025e+06	2.76048e+06	Q80UU1	Ankzf1	82976.2		82976.2	Ankzf1	1959.65	2618.04	3023.26	1985.69	969.975	1352.16	1226.95	Ankzf1	14.365	15.6179	17.956	15.3016	13.0047	17.1003	14.088	Q80UU1	Ankzf1	3	4	1183.03	2396.66	1.01855	2.24608	2.25192
Q8K298	Anln	Anillin	ANLN_MOUSE	122794	0	2	1	0	0	0	0	NaN	140611	49039.7	NaN	NaN	NaN	NaN	Q8K298	Anln	122794		122794	Anln		65.1001	24.7075					Anln		0.388355	0.146745					Q8K298	Anln		2		44.9038
Q8BH79;Q8BH79-2;Q8BH79-4	Ano10	Anoctamin-10;Isoform 2 of Anoctamin-10;Isoform 4 of Anoctamin-10	ANO10_MOUSE	76187.79;76187.79-2;76187.79-4	11	10	8	8	11	12	12	3.2627e+06	3.14987e+06	2.52191e+06	2192733	2.24747e+06	2.97242e+06	3901199	Q8BH79	Ano10	76187.8		76187.8	Ano10	2267.22	2350.42	2047.87	1604.5	1176.87	1619.72	1888.45	Ano10	16.6196	14.0215	12.1628	12.3641	15.7785	20.484	21.6836	Q8BH79	Ano10	3	4	1561.68	2067.5	0.404791	0.916967	1.11439
Q6P9J9	Ano6	Anoctamin-6	ANO6_MOUSE	106255	10	10	15	13	14	15	13	2922161	3.26128e+06	4072774	3.23527e+06	2985262	3.49203e+06	4.59314e+06	Q6P9J9	Ano6	106255		106255	Ano6	1455.98	1744.93	2371.37	1697.46	1120.86	1364.41	1594.24	Ano6	10.6729	10.4094	14.0842	13.0805	15.0277	17.2552	18.3053	Q6P9J9	Ano6	3	4	1359.84	1817.44	0.418472	0.947803	1.14165
O35381	Anp32a	Acidic leucine-rich nuclear phosphoprotein 32 family member A	AN32A_MOUSE	28537.5	15	15	14	14	22	22	22	400595104	454125216	439518560	403012448	459559264	520904736	730382272	O35381	Anp32a	28537.5		28537.5	Anp32a	743175	904687	952837	787300	642457	757804	943903	Anp32a	5447.77	5396.92	5659.16	6066.88	8613.58	9583.69	10838.1	O35381	Anp32a	3	4	781388	847000	0.116323	0.317428	0.575027
Q9EST5;Q9EST5-2	Anp32b	Acidic leucine-rich nuclear phosphoprotein 32 family member B;Isoform 2 of Acidic leucine-rich nuclear phosphoprotein 32 family member B	AN32B_MOUSE	31078.74;31078.74-2	7	7	7	6	10	11	11	385765504	467161216	425486816	329891200	265962288	316258880	395337984	Q9EST5	Anp32b	31078.7		31078.7	Anp32b	657147	854560	846995	591760	341410	422469	469136	Anp32b	4817.14	5097.89	5030.53	4560.07	4577.36	5342.82	5386.71	Q9EST5	Anp32b	3	4	411005	737616	0.843714	2.12343	2.15493
P97822	Anp32e	Acidic leucine-rich nuclear phosphoprotein 32 family member E	AN32E_MOUSE	29622.5	12	11	11	10	12	11	12	105133080	117183816	103744304	100646448	63167992	88391800	126877248	P97822	Anp32e	29622.5		29622.5	Anp32e	187897	224898	216671	189416	85073.6	123881	157963	Anp32e	1377.36	1341.63	1286.87	1459.62	1140.6	1566.69	1813.76	P97822	Anp32e	3	4	122306	204721	0.74316	1.71231	1.81435
Q501J2	Antkmt	Adenine nucleotide translocase lysine N-methyltransferase	ANKMT_MOUSE	24739.7	8	8	8	7	7	6	4	2.5382e+06	3.55731e+06	2.98635e+06	2.33832e+06	667344	651814	292325	Q501J2	Antkmt	24739.7		24739.7	Antkmt	5431.68	8174.6	7468	5269.24	1076.15	1093.82	435.778	Antkmt	39.8164	48.7657	44.3544	40.6044	14.4283	13.8331	5.00368	Q501J2	Antkmt	3	4	868.582	6585.88	2.92264	3.12055	2.8939	up
Q6DFX2	Antxr2	Anthrax toxin receptor 2	ANTR2_MOUSE	53184.3	1	0	0	0	3	3	3	33505.3	NaN	NaN	NaN	484503	457434	882436	Q6DFX2	Antxr2	53184.3		53184.3	Antxr2	33.3528				363.44	357.076	611.919	Antxr2	0.24449				4.87273	4.51582	7.02617	Q6DFX2	Antxr2	3	1	444.145	33.3528	-3.73515	1.731	1.83093
P10107	Anxa1	Annexin A1	ANXA1_MOUSE	38734.3	19	17	19	21	26	29	28	13250721	12940600	11152885	12416483	25998494	23954344	31933266	P10107	Anxa1	38734.3		38734.3	Anxa1	18111.2	18993.2	17813.5	17870.7	26777.6	25674.6	30404.7	Anxa1	132.762	113.304	105.799	137.71	359.014	324.698	349.113	P10107	Anxa1	3	4	27619	18197.1	-0.601948	3.55348	3.1521	down
P97384	Anxa11	Annexin A11	ANX11_MOUSE	54079.3	18	18	20	19	25	25	27	74315504	79065920	72102392	66298500	87915872	88944272	115016632	P97384	Anxa11	54079.3		54079.3	Anxa11	72752.9	83118.4	82485.3	68345.7	64856.7	68281.3	78437.4	Anxa11	533.308	495.844	489.902	526.667	869.55	863.531	900.632	P97384	Anxa11	3	4	70525.1	76675.6	0.12063	0.506406	0.746261
P07356	Anxa2	Annexin A2	ANXA2_MOUSE	38676.2	14	16	17	15	19	19	20	6346332	13279490	9283602	6.97301e+06	9448708	9318147	19932218	P07356	Anxa2	38676.2		38676.2	Anxa2	8687.23	19519.9	14850.2	10051.1	9746.48	10002.3	19006.6	Anxa2	63.6808	116.446	88.199	77.4534	130.673	126.496	218.238	P07356	Anxa2	3	4	12918.5	13277.1	0.0395032	0.0318768	0.323419
O35639	Anxa3	Annexin A3	ANXA3_MOUSE	36384.1	0	1	0	0	0	0	0	NaN	7375.88	NaN	NaN	NaN	NaN	NaN	O35639	Anxa3	36384.1		36384.1	Anxa3		11.525						Anxa3		0.0687527						O35639	Anxa3		1		11.525
P97429	Anxa4	Annexin A4	ANXA4_MOUSE	35915.7	18	16	17	17	19	19	20	27039812	29700682	25184242	26080082	22130358	21353648	25401712	P97429	Anxa4	35915.7		35915.7	Anxa4	39858.5	47013.3	43381.3	40482.1	24582.3	24683.3	26083.9	Anxa4	292.179	280.459	257.653	311.952	329.581	312.161	299.5	P97429	Anxa4	3	4	25116.5	42683.8	0.765054	3.99437	3.37135
P48036	Anxa5	Annexin A5	ANXA5_MOUSE	35752.4	19	21	23	21	30	28	29	78815392	89265792	79882448	73533040	117324512	123788928	157289184	P48036	Anxa5	35752.4		35752.4	Anxa5	116710	141945	138231	114661	130919	143745	162251	Anxa5	855.53	846.772	820.988	883.569	1755.26	1817.89	1862.99	P48036	Anxa5	3	4	145638	127886	-0.187524	0.745487	0.960297
P14824	Anxa6	Annexin A6	ANXA6_MOUSE	75885.3	55	53	55	54	72	70	71	639665856	713707584	611992192	569003136	802107840	869264512	862797120	P14824	Anxa6	75885.3		75885.3	Anxa6	446270	534690	498938	418019	421691	475565	419319	Anxa6	3271.34	3189.7	2963.33	3221.22	5653.71	6014.31	4814.7	P14824	Anxa6	3	4	438858	474479	0.11259	0.450002	0.694173
Q07076	Anxa7	Annexin A7	ANXA7_MOUSE	49925.3	23	23	24	23	26	26	25	85416344	100933256	95430000	76824600	76169664	84150080	110272248	Q07076	Anxa7	49925.3		49925.3	Anxa7	90578	114935	118256	85786.4	60866.8	69976	81459.1	Anxa7	663.973	685.648	702.353	661.064	816.057	884.963	935.328	Q07076	Anxa7	3	4	70767.3	102389	0.532904	1.55394	1.68005
O35643	Ap1b1	AP1AP-1 complex subunit beta-1	AP1B1_MO	103935	51	52	54	51	62	61	63	214980320	247595200	225928960	186235424	153319776	166792256	194832416	O35643	Ap1b1	103935		103935	Ap1b1	109506	135432	134484	99894	58851.3	66623.9	69134.3	Ap1b1	802.726	807.92	798.733	769.777	789.034	842.57	793.813	O35643	Ap1b1	3	4	64869.8	119829	0.885357	2.78386	2.66139
P22892	Ap1g1	AP1AP-1 complex subunit gamma-1	AP1G1_MO	91350.5	31	33	33	34	36	37	37	56903516	98636600	86340296	67872344	54132892	59858460	77864472	P22892	Ap1g1	91350.5		91350.5	Ap1g1	32978.5	61385.6	58473.8	41421	23641.2	27203.8	31435.6	Ap1g1	241.745	366.197	347.291	319.187	316.963	344.038	360.95	P22892	Ap1g1	3	4	27426.9	48564.7	0.824318	1.47942	1.61527
O88512	Ap1g2	AP1AP-1 complex subunit gamma-like 2	AP1G2_MO	87863.1	30	31	29	30	30	31	31	34513900	40675208	36883764	30109082	28679982	31288548	41197216	O88512	Ap1g2	87863.1		87863.1	Ap1g2	20796.5	26318.6	25970.9	19104.2	13022.4	14784.1	17292.4	Ap1g2	152.446	157.004	154.248	147.216	174.595	186.969	198.554	O88512	Ap1g2	3	4	15033	23047.5	0.616484	1.81912	1.90572
P35585	Ap1m1	AP1AP-1 complex subunit mu-1	AP1M1_MO	48542.8	22	23	23	23	27	27	29	90406112	105880504	96459272	81429632	67414792	66681920	89495312	P35585	Ap1m1	48542.8		48542.8	Ap1m1	98599.5	124002	122935	93518.1	55405	57029.3	67993.7	Ap1m1	722.774	739.738	730.146	720.644	742.829	721.231	780.717	P35585	Ap1m1	3	4	60142.7	109764	0.867942	2.68798	2.59186
P61967	Ap1s1	AP1AP-1 complex subunit sigma-1A	AP1S1_MO	18733	9	9	9	9	8	8	8	10591226	11912061	11889048	9331354	5.18457e+06	4.9847e+06	5930210	P61967	Ap1s1	18733		18733	Ap1s1	29932.4	36150.9	39264.4	27770	11041.4	11047.1	11675	Ap1s1	219.417	215.659	233.202	213.994	148.035	139.709	134.055	P61967	Ap1s1	3	4	11254.5	33279.4	1.56413	3.99185	3.37135
Q9DB50	Ap1s2	AP1AP-1 complex subunit sigma-2	AP1S2_MO	18929.1	4	3	3	4	4	4	5	1.12885e+06	1.09308e+06	836209	828633	1.83069e+06	1412021	2067720	Q9DB50	Ap1s2	18929.1		18929.1	Ap1s2	3157.24	3282.95	2733.03	2440.46	3858.38	3096.9	4028.62	Ap1s2	23.1438	19.5845	16.2322	18.806	51.7302	39.1654	46.2573	Q9DB50	Ap1s2	3	4	3661.3	2903.42	-0.334603	1.10221	1.2795
Q7TN05	Ap1s3	AP1AP-1 complex subunit sigma-3	AP1S3_MO	18440.4	4	5	5	5	4	4	4	6032021	5721975	5110296	4739163	4.63434e+06	4.89233e+06	6.62228e+06	Q7TN05	Ap1s3	18440.4		18440.4	Ap1s3	17317.9	17640.7	17144.9	14327.5	10026.2	11014.4	13244.4	Ap1s3	126.947	105.236	101.828	110.407	134.424	139.296	152.074	Q7TN05	Ap1s3	3	4	11428.3	16607.8	0.539241	2.08175	2.12283
P17426;P17426-2	Ap2a1	AP2AP-2 complex subunit alpha-1;AP2Isoform B of AP-2 complex subunit alpha-1	AP2A1_MO	107664.08;107664.08-2	49	48	53	49	49	52	50	86492472	101746336	100901296	76632968	69174704	74140800	98940800	P17426	Ap2a1	107664		107664	Ap2a1	42531.4	53726.4	57980.8	39681.1	25632.8	28589.2	33892.1	Ap2a1	311.772	320.505	344.363	305.78	343.665	361.558	389.155	P17426	Ap2a1	3	4	29371.3	48479.9	0.722978	1.93947	2.00704
P17427	Ap2a2	AP2AP-2 complex subunit alpha-2	AP2A2_MO	104017	32	33	31	32	31	32	31	28635994	32471520	28758554	26261532	24839266	27404792	29430620	P17427	Ap2a2	104017		104017	Ap2a2	14575.1	17747.6	17105	14075.3	9526.99	10938	10435	Ap2a2	106.841	105.874	101.591	108.463	127.731	138.33	119.816	P17427	Ap2a2	3	4	10300	15875.7	0.624181	2.61667	2.53908
Q9DBG3;Q9DBG3-2	Ap2b1	AP2AP-2 complex subunit beta;AP2Isoform 2 of AP-2 complex subunit beta	AP2B1_MO	104582.59;104582.59-2	27	27	28	28	32	33	33	89598688	100356568	89280216	78123848	48632976	53291196	71067552	Q9DBG3	Ap2b1	104583		104583	Ap2b1	45357	54553.9	52814.6	41645	18552	21154.9	25061.4	Ap2b1	332.485	325.442	313.68	320.913	248.731	267.539	287.76	Q9DBG3	Ap2b1	3	4	21589.4	48592.6	1.17041	3.24357	2.97058
P84091	Ap2m1	AP2AP-2 complex subunit mu	AP2M1_MO	49654.7	21	20	19	19	22	23	25	46911628	51495944	43407360	35836592	28454416	26481106	35713308	P84091	Ap2m1	49654.7		49654.7	Ap2m1	50017.6	58959.3	54083.1	40235.1	22861.7	22140.7	26525.5	Ap2m1	366.649	351.723	321.214	310.049	306.513	280.006	304.571	P84091	Ap2m1	3	4	23842.6	50823.8	1.09196	3.03285	2.83763
P62743	Ap2s1	AP2AP-2 complex subunit sigma	AP2S1_MO	17017.7	5	6	7	7	5	7	5	7136315	8665908	7664854	5063231	5419805	6.20661e+06	6.1302e+06	P62743	Ap2s1	17017.7		17017.7	Ap2s1	22201.1	28950.3	27865.1	16586.9	12705.8	15141.5	13285.2	Ap2s1	162.743	172.703	165.499	127.818	170.35	191.489	152.543	P62743	Ap2s1	3	4	13710.8	23900.9	0.801748	1.71058	1.81316
Q9Z1T1	Ap3b1	AP3AP-3 complex subunit beta-1	AP3B1_MO	122740	36	38	37	37	47	45	47	36746156	45377532	37726156	33124534	34170496	33962960	39084996	Q9Z1T1	Ap3b1	122740		122740	Ap3b1	15849.9	21018.1	19015.8	15045.3	11106.7	11487.7	11744	Ap3b1	116.186	125.384	112.94	115.938	148.91	145.281	134.847	Q9Z1T1	Ap3b1	3	4	11446.1	17732.3	0.631518	2.232	2.24042
O54774	Ap3d1	AP3AP-3 complex subunit delta-1	AP3D1_MO	135081	43	41	43	43	48	48	47	39495568	44592092	42469912	36395816	29681098	30179776	38263560	O54774	Ap3d1	135081		135081	Ap3d1	15479.4	18767.3	19451.1	15020.9	8766.05	9275.47	10446.8	Ap3d1	113.47	111.957	115.525	115.75	117.529	117.304	119.952	O54774	Ap3d1	3	4	9496.11	17179.7	0.855295	2.92487	2.76012
Q9JKC8	Ap3m1	AP3AP-3 complex subunit mu-1	AP3M1_MO	46936.2	16	16	16	16	15	16	17	15543051	26784672	21377616	21012026	14244153	15771570	19969126	Q9JKC8	Ap3m1	46936.2		46936.2	Ap3m1	17532	32442.8	28178	24957.4	12107.3	13950.3	15690.8	Ap3m1	128.516	193.538	167.357	192.32	162.326	176.424	180.165	Q9JKC8	Ap3m1	3	4	13916.1	25777.5	0.889356	1.78875	1.88071
Q8R2R9	Ap3m2	AP3AP-3 complex subunit mu-2	AP3M2_MO	46916.3	6	6	5	5	8	9	9	34596896	1.32334e+06	993508	1.00665e+06	2.57059e+06	2.47731e+06	3280519	Q8R2R9	Ap3m2	46916.3		46916.3	Ap3m2	39040.5	1603.56	1310.1	1196.17	2185.89	2192.16	2578.77	Ap3m2	286.183	9.56607	7.78106	9.2176	29.3067	27.7235	29.6099	Q8R2R9	Ap3m2	3	4	2318.94	10787.6	2.21784	0.113802	0.394322
Q9DCR2	Ap3s1	AP3AP-3 complex subunit sigma-1	AP3S1_MO	21732.1	5	7	7	5	7	8	6	2.17854e+06	4.16601e+06	3.8214e+06	2259782	2.28222e+06	3015444	2.18906e+06	Q9DCR2	Ap3s1	21732.1		21732.1	Ap3s1	5307.21	10898.3	10878.7	5797	4189.62	5760.56	3714.93	Ap3s1	38.904	65.0138	64.6118	44.6713	56.1712	72.8519	42.6555	Q9DCR2	Ap3s1	3	4	4555.04	8220.31	0.85173	1.07756	1.25636
Q8BSZ2	Ap3s2	AP3AP-3 complex subunit sigma-2	AP3S2_MO	22017.4	6	6	5	6	7	6	7	2820336	3.20494e+06	3.75917e+06	2825901	2.74639e+06	3.28763e+06	2.54861e+06	Q8BSZ2	Ap3s2	22017.4		22017.4	Ap3s2	6781.67	8275.47	10562.9	7155.32	4976.39	6199.15	4269.04	Ap3s2	49.7123	49.3674	62.736	55.1384	66.7197	78.3985	49.0179	Q8BSZ2	Ap3s2	3	4	5148.19	8193.84	0.670474	1.57791	1.70033
Q9WV76	Ap4b1	AP4AP-4 complex subunit beta-1	AP4B1_MO	82976	13	12	13	13	13	14	12	1.51681e+06	2.18919e+06	1.43679e+06	2060084	1.33984e+06	1.49428e+06	1.58855e+06	Q9WV76	Ap4b1	82976		82976	Ap4b1	967.791	1499.93	1071.27	1384.11	644.2	747.642	706.063	Ap4b1	7.09429	8.94782	6.36256	10.6659	8.63695	9.45518	8.10714	Q9WV76	Ap4b1	3	4	699.302	1230.77	0.815579	2.11659	2.15022
Q80V94	Ap4e1	AP4AP-4 complex subunit epsilon-1	AP4E1_MO	124845	14	14	16	12	10	16	11	3.19689e+06	2.73022e+06	2.45503e+06	1.79782e+06	1.39407e+06	1.7371e+06	1.20791e+06	Q80V94	Ap4e1	124845		124845	Ap4e1	1355.68	1243.27	1216.58	802.81	445.483	577.652	356.825	Ap4e1	9.93769	7.41672	7.22562	6.1864	5.97269	7.30537	4.09713	Q80V94	Ap4e1	3	4	459.987	1154.59	1.32771	2.41841	2.38999
Q9JKC7	Ap4m1	AP4AP-4 complex subunit mu-1	AP4M1_MO	49509.4	6	5	9	6	9	9	7	2191174	2339154	3.48424e+06	1.26325e+06	1.91094e+06	1.89478e+06	1.49023e+06	Q9JKC7	Ap4m1	49509.4		49509.4	Ap4m1	2343.1	2686.03	4353.9	1422.45	1539.85	1588.87	1110.09	Ap4m1	17.1759	16.0235	25.859	10.9613	20.6452	20.0938	12.7463	Q9JKC7	Ap4m1	3	4	1412.94	2701.37	0.934994	1.00215	1.1895
Q9WVL1	Ap4s1	AP4AP-4 complex subunit sigma-1	AP4S1_MO	16817.5	3	2	2	3	3	4	3	763569	523414	501966	786299	264662	283554	532352	Q9WVL1	Ap4s1	16817.5		16817.5	Ap4s1	2403.75	1769.39	1846.59	2606.54	627.84	699.986	1167.43	Ap4s1	17.6204	10.5553	10.9674	20.0858	8.41761	8.85249	13.4047	Q9WVL1	Ap4s1	3	4	831.752	2156.57	1.37451	2.3806	2.35902
Q3TAP4	Ap5b1	AP5AP-5 complex subunit beta-1	AP5B1_MO	94678.7	7	12	8	8	12	13	15	1.54538e+06	2472169	2290595	1.8989e+06	2.86958e+06	2.86448e+06	2.9467e+06	Q3TAP4	Ap5b1	94678.7		94678.7	Ap5b1	864.142	1484.45	1496.77	1118.12	1209.16	1256.06	1147.83	Ap5b1	6.3345	8.8555	8.8897	8.61617	16.2116	15.8849	13.1796	Q3TAP4	Ap5b1	3	4	1204.35	1240.87	0.043097	0.0122311	0.306516
Q8BJ63	Ap5m1	AP5AP-5 complex subunit mu-1	AP5M1_MO	54336.6	6	6	7	7	7	8	5	1.212e+06	1825802	1598621	1.44264e+06	1.62611e+06	1.93386e+06	1.61517e+06	Q8BJ63	Ap5m1	54336.6		54336.6	Ap5m1	1180.9	1910.3	1820.17	1480.15	1193.92	1477.57	1096.27	Ap5m1	8.65649	11.3959	10.8105	11.4059	16.0072	18.6864	12.5876	Q8BJ63	Ap5m1	3	4	1255.92	1597.88	0.347411	0.737327	0.952965
Q3U829	Ap5z1	AP5AP-5 complex subunit zeta-1	AP5Z1_MO	89406.5	11	14	13	9	16	15	16	1.83961e+06	2647623	2.44508e+06	1.44544e+06	2985702	3.03114e+06	4.1234e+06	Q3U829	Ap5z1	89406.5		89406.5	Ap5z1	1089.33	1683.55	1691.93	901.3	1332.28	1407.51	1700.91	Ap5z1	7.98521	10.0432	10.0488	6.94536	17.8622	17.8003	19.5301	Q3U829	Ap5z1	3	4	1480.23	1341.53	-0.141948	0.26682	0.529285
O88879	Apaf1	Apoptotic protease-activating factor 1	APAF_MOUSE	141003	25	26	28	28	38	38	37	7.75775e+06	12311312	9377823	10133734	15068828	14817339	20461230	O88879	Apaf1	141003		141003	Apaf1	2912.79	4963.82	4114.64	4006.64	4263.54	4362.72	5351.77	Apaf1	21.3519	29.6117	24.438	30.8749	57.1624	55.1739	61.45	O88879	Apaf1	3	4	4659.34	3999.47	-0.220317	0.517313	0.75634
O88888	Apba3	Amyloid-beta A4 precursor protein-binding family A member 3	APBA3_MOUSE	60717.6	2	0	0	0	0	0	0	206981	NaN	NaN	NaN	NaN	NaN	NaN	O88888	Apba3	60717.6		60717.6	Apba3	180.475							Apba3	1.32296							O88888	Apba3		1		180.475
Q8R5A3	Apbb1ip	Amyloid beta A4 precursor protein-binding family B member 1-interacting protein	AB1IP_MOUSE	74319.3	18	18	20	20	23	22	23	36587076	48310856	44466492	35872556	37241588	39281744	52002364	Q8R5A3	Apbb1ip	74319.3		74319.3	Apbb1ip	26063.2	36955.8	37016	26909.1	19991.5	21943.4	25805.7	Apbb1ip	191.054	220.46	219.848	207.36	268.031	277.511	296.306	Q8R5A3	Apbb1ip	3	4	22580.2	31736	0.491063	1.28958	1.44768
Q8R146;Q8R146-2	Apeh	Acylamino-acid-releasing enzyme;Isoform 2 of Acylamino-acid-releasing enzyme	ACPH_MOUSE	81580.86;81580.86-2	28	26	24	25	32	34	31	53336184	66754884	57935940	48195292	48738840	52600648	67583848	Q8R146	Apeh	81580.9		81580.9	Apeh	34612.7	46519.4	43935.8	32934.8	23834.5	26768.1	30552.6	Apeh	253.725	277.512	260.946	253.793	319.555	338.528	350.811	Q8R146	Apeh	3	4	27051.7	39500.7	0.546155	1.60234	1.72071
P28352	Apex1	DNA-(apurinic or apyrimidinic site) endonuclease	APEX1_MOUSE	35490.4	21	20	22	22	27	28	28	281231200	317418304	278031456	253081056	262579360	257943296	311457760	P28352	Apex1	35490.4		35490.4	Apex1	419522	508464	484665	397546	295168	301737	323655	Apex1	3075.26	3033.25	2878.55	3063.46	3957.38	3815.97	3716.26	P28352	Apex1	3	4	306853	452549	0.560526	2.48995	2.44435
Q68G58	Apex2	DNA-(apurinic or apyrimidinic site) endonuclease 2	APEX2_MOUSE	57339.7	3	3	3	3	0	0	0	435635	481417	453165	350172	NaN	NaN	NaN	Q68G58	Apex2	57339.7		57339.7	Apex2	402.225	477.315	488.944	340.458				Apex2	2.94847	2.84743	2.90397	2.62355				Q68G58	Apex2		4		427.236				up-a
Q8BVF7;Q8BVF7-2	Aph1a	Gamma-secretase subunit APH-1A;Isoform 2 of Gamma-secretase subunit APH-1A	APH1A_MOUSE	28985.99;28985.99-2	2	2	2	2	1	1	2	678292	609805	725635	551919	182606	198172	193544	Q8BVF7	Aph1a	28986		28986	Aph1a	1238.88	1196.03	1548.77	1061.51	251.331	283.837	246.255	Aph1a	9.08152	7.13494	9.19858	8.17996	3.36966	3.5896	2.82755	Q8BVF7	Aph1a	3	4	260.475	1261.3	2.2757	4.71031	3.53117	up
O35841	Api5	Apoptosis inhibitor 5	API5_MOUSE	56785.2	27	28	30	30	36	35	36	217542576	248426624	223090128	190133024	197431792	166695776	199823072	O35841	Api5	56785.2		56785.2	Api5	202820	248715	243054	186664	138708	121872	129779	Api5	1486.75	1483.71	1443.57	1438.42	1859.69	1541.28	1490.15	O35841	Api5	3	4	130120	220314	0.759719	2.70029	2.59978
Q9WVQ5	Apip	Methylthioribulose-1-phosphate dehydratase	MTNB_MOUSE	26949.1	13	13	14	15	15	17	17	19691562	21450342	23110616	18988450	22724886	23801162	34579404	Q9WVQ5	Apip	26949.1		26949.1	Apip	38684.6	45251.2	53054.9	39281.1	33641.6	36666.5	47322.5	Apip	283.574	269.946	315.108	302.698	451.041	463.709	543.365	Q9WVQ5	Apip	3	4	39210.2	44068	0.168502	0.427003	0.673216
Q9D842	Aplf	Aprataxin and PNK-like factor	APLF_MOUSE	54968.5	5	4	6	2	4	5	4	571297	567006	551811	67895.3	415891	574671	565285	Q9D842	Aplf	54968.5		54968.5	Aplf	550.238	586.426	621.062	68.8596	301.846	434.031	379.269	Aplf	4.03347	3.49834	3.68865	0.530627	4.04692	5.48904	4.35484	Q9D842	Aplf	3	4	371.715	456.647	0.29688	0.0376314	0.328194
Q06335;Q06335-2	Aplp2	Amyloid beta precursor like protein 2;Isoform 2 of Amyloid beta precursor like protein 2	APLP2_MOUSE	80467.16;80467.16-2	0	0	0	1	0	0	0	NaN	NaN	NaN	91046.6	NaN	NaN	NaN	Q06335	Aplp2	80467.2		80467.2	Aplp2				63.0788				Aplp2				0.486081				Q06335	Aplp2		1		63.0788
Q9D7N9	Apmap	Adipocyte plasma membrane-associated protein	APMAP_MOUSE	46434.3	19	21	20	18	23	23	24	32886598	37892932	30809372	25629954	27922746	28512358	31613288	Q9D7N9	Apmap	46434.3		46434.3	Apmap	37495.8	46393.7	41049	30771.4	23990.4	25492.3	25108.7	Apmap	274.859	276.762	243.801	237.122	321.646	322.393	288.303	Q9D7N9	Apmap	3	4	24863.8	38927.4	0.64674	2.08303	2.12355
Q00623	Apoa1	Apolipoprotein A-I	APOA1_MOUSE	30615.5	3	2	2	2	6	6	6	23381338	45803772	24829696	13215887	35848880	32603358	40894084	Q00623	Apoa1	30615.5		30615.5	Apoa1	40432.5	85054.9	50175.1	24065.4	46714.7	44211.6	49262.1	Apoa1	296.386	507.396	298.003	185.447	626.315	559.129	565.636	Q00623	Apoa1	3	4	46729.5	49932	0.0956318	0.0371386	0.327913
E9Q414	Apob	Apolipoprotein B-100	APOB_MOUSE	509432	5	6	5	4	5	5	6	3756541	5.08229e+06	4027402	3.29649e+06	1.62019e+06	1.71724e+06	2.66503e+06	E9Q414	Apob	509432		509432	Apob	390.395	567.17	489.099	360.748	126.881	139.946	192.935	Apob	2.86175	3.38346	2.90489	2.7799	1.70113	1.76985	2.21531	E9Q414	Apob	3	4	153.254	451.853	1.55993	2.94282	2.77244
P51908	Apobec1	C->U-editing enzyme APOBEC-1	ABEC1_MOUSE	27521.7	0	1	0	0	0	0	0	NaN	101593	NaN	NaN	NaN	NaN	NaN	P51908	Apobec1	27521.7		27521.7	Apobec1		209.86						Apobec1		1.25192						P51908	Apobec1		1		209.86
Q99J72;Q99J72-4	Apobec3	DNA dC->dU-editing enzyme APOBEC-3;Isoform 4 of DNA dC->dU-editing enzyme APOBEC-3	ABEC3_MOUSE	52213.43;52213.43-4	21	22	21	21	25	25	24	95158840	134247360	113563440	96415776	40830952	37990144	44122720	Q99J72	Apobec3	52213.4		52213.4	Apobec3	96487.1	146172	134560	102945	31198	30206.7	31165.5	Apobec3	707.289	871.989	799.185	793.286	418.279	382.015	357.848	Q99J72	Apobec3	3	4	30856.7	120041	1.95987	4.00782	3.37529
P08226	Apoe	Apolipoprotein E	APOE_MOUSE	35866.6	1	1	1	1	2	2	2	1059412	1.80201e+06	1066160	1120205	853820	912443	1.1962e+06	P08226	Apoe	35866.6		35866.6	Apoe	1563.79	2856.31	1839.04	1741.19	949.72	1056.16	1230.01	Apoe	11.4632	17.0394	10.9225	13.4175	12.7331	13.3569	14.1232	P08226	Apoe	3	4	1078.63	2000.08	0.89086	1.77343	1.86703
Q01339	Apoh	Beta-2-glycoprotein 1	APOH_MOUSE	38618.8	1	1	1	1	1	1	1	2911880	7768897	4.84115e+06	2239736	4.19812e+06	5.10804e+06	6284439	Q01339	Apoh	38618.8		38618.8	Apoh	3991.87	11436.7	7755.46	3233.23	4336.85	5491.24	6001.52	Apoh	29.262	68.2256	46.0618	24.915	58.1453	69.4458	68.9106	Q01339	Apoh	3	4	5276.54	6604.31	0.323817	0.110007	0.391154
Q9DCZ4;Q9DCZ4-2;Q9DCZ4-3	Apoo	MICOS complex subunit Mic26;Isoform 2 of MICOS complex subunit Mic26;Isoform 3 of MICOS complex subunit Mic26	MIC26_MOUSE	22603.98;22603.98-2;22603.98-3	5	5	5	5	6	5	5	7.66033e+06	8.38315e+06	8.22242e+06	7.31086e+06	5.31131e+06	4867203	6.57465e+06	Q9DCZ4	Apoo	22604		22604	Apoo	17941.8	21084.4	22504.7	18031.1	9374.23	8939.43	10727.1	Apoo	131.52	125.779	133.661	138.946	125.683	113.054	123.17	Q9DCZ4	Apoo	3	4	9680.25	19890.5	1.03896	3.50974	3.12738
Q78IK4	Apool	MICOS complex subunit Mic27	MIC27_MOUSE	29260.7	18	17	18	17	19	19	19	21468696	23530246	22035286	17920034	16939244	19235050	25050708	Q78IK4	Apool	29260.7		29260.7	Apool	38843.9	45717.3	46589.9	34142.3	23095.5	27291.3	31573.9	Apool	284.741	272.727	276.71	263.098	309.648	345.143	362.538	Q78IK4	Apool	3	4	27320.3	41323.4	0.596987	1.80674	1.89559
Q9DAX9	Appbp2	Amyloid protein-binding protein 2	APBP2_MOUSE	66855.3	7	9	5	6	0	0	2	1.4844e+06	15052515	1140666	1.067e+06	NaN	NaN	149182	Q9DAX9	Appbp2	66855.3		66855.3	Appbp2	1175.49	12800.1	1055.55	889.744			82.295	Appbp2	8.61678	76.359	6.26922	6.85631			0.944926	Q9DAX9	Appbp2	1	4	82.295	3980.21	5.5959	0.953502	1.14665
Q8K3H0	Appl1	DCC-interacting protein 13-alpha	DP13A_MOUSE	79328.1	28	26	27	26	29	30	31	21589688	22503920	20064828	18869444	15669465	15674514	20628370	Q8K3H0	Appl1	79328.1		79328.1	Appl1	14408.6	16127.6	15648.3	13260.8	7880.36	8203.18	9590.28	Appl1	105.621	96.2096	92.9393	102.187	105.654	103.743	110.117	Q8K3H0	Appl1	3	4	8557.94	14861.3	0.796228	3.21529	2.95208
Q8K3G9	Appl2	DCC-interacting protein 13-beta	DP13B_MOUSE	73853.7	0	0	2	0	0	3	2	NaN	NaN	687028	NaN	NaN	617778	686773	Q8K3G9	Appl2	73853.7		73853.7	Appl2			575.52			347.276	342.953	Appl2			3.41817			4.39189	3.93785	Q8K3G9	Appl2	2	1	345.115	575.52	0.73779	1.86958	1.94867
P08030	Aprt	Adenine phosphoribosyltransferase	APT_MOUSE	19723.9	12	12	12	12	13	14	13	57049184	91441816	79544496	62804448	37608028	36365756	42630972	P08030	Aprt	19723.9		19723.9	Aprt	153129	263567	249503	177515	76068.8	76544.6	79712.4	Aprt	1122.5	1572.31	1481.86	1367.92	1019.87	968.034	915.272	P08030	Aprt	3	4	77441.9	210929	1.44557	2.81575	2.68496
Q7TQC5;Q7TQC5-3	Aptx	Aprataxin;Isoform 3 of Aprataxin	APTX_MOUSE	38722.82;38722.82-3	6	8	5	5	7	8	7	2426081	3231961	2.6251e+06	1.99853e+06	1.48394e+06	1.60786e+06	2.03554e+06	Q7TQC5	Aptx	38722.8		38722.8	Aptx	3316.96	4745.03	4194.09	2877.28	1528.86	1723.83	1938.68	Aptx	24.3147	28.3065	24.9098	22.1721	20.4979	21.8008	22.2603	Q7TQC5	Aptx	3	4	1730.46	3783.34	1.12851	2.49085	2.44483
Q9WTY4	Aqp5	Aquaporin-5	AQP5_MOUSE	28274.1	1	0	0	1	0	0	0	185071	NaN	NaN	86249.6	NaN	NaN	NaN	Q9WTY4	Aqp5	28274.1		28274.1	Aqp5	346.538			170.062				Aqp5	2.54026			1.31048				Q9WTY4	Aqp5		2		258.3
Q8CFQ3	Aqr	RNA helicase aquarius	AQR_MOUSE	170294	64	62	65	61	65	64	61	72917760	87671024	80157792	65596416	40963376	39130608	54265816	Q8CFQ3	Aqr	170294		170294	Aqr	22669.2	29268.2	29120.9	21474.3	9596.57	9539.66	11752.3	Aqr	166.174	174.6	172.957	165.48	128.664	120.645	134.942	Q8CFQ3	Aqr	3	4	10296.2	25633.2	1.31591	3.32652	3.01802
P04627	Araf	Serine/threonine-protein kinase A-Raf	ARAF_MOUSE	67581.5	16	17	15	16	18	16	19	14073227	16797722	15001992	12848797	9148761	9060211	11803667	P04627	Araf	67581.5		67581.5	Araf	11024.7	14130.7	13733.5	10599.2	5400.75	5565.78	6441.44	Araf	80.8157	84.2966	81.5666	81.6768	72.4091	70.3885	73.9618	P04627	Araf	3	4	5802.66	12372	1.09229	3.21079	2.94909
Q4LDD4	Arap1	Arf-GAP with Rho-GAP domain, ANK repeat and PH domain-containing protein 1	ARAP1_MOUSE	162276	53	55	54	52	64	62	63	61517236	67517704	61962856	49400140	68241872	61811612	103737024	Q4LDD4	Arap1	162276		162276	Arap1	20069.9	23653.9	23623	16971.2	16777.1	15813.6	23576.2	Arap1	147.12	141.108	140.304	130.779	224.934	199.99	270.706	Q4LDD4	Arap1	3	4	18722.3	21079.5	0.171085	0.385417	0.635818
Q8BZ05	Arap2	Arf-GAP with Rho-GAP domain, ANK repeat and PH domain-containing protein 2	ARAP2_MOUSE	193398	31	29	28	30	13	15	11	8279686	8817398	7.47064e+06	7241457	1.18079e+06	1.19745e+06	1.35632e+06	Q8BZ05	Arap2	193398		193398	Arap2	2266.54	2591.95	2389.81	2087.43	243.577	257.05	258.645	Arap2	16.6146	15.4623	14.1937	16.0856	3.2657	3.25083	2.96981	Q8BZ05	Arap2	3	4	253.091	2333.93	3.20503	6.70894	3.74896	up
Q5XJY5	Arcn1	Coatomer subunit delta	COPD_MOUSE	57229.4	34	35	36	33	37	38	37	120578424	137749568	122009424	103828288	67576680	74377888	93535208	Q5XJY5	Arcn1	57229.4		57229.4	Arcn1	111546	136839	131896	101143	47108.2	53956	60276.7	Arcn1	817.674	816.316	783.367	779.4	631.592	682.364	692.109	Q5XJY5	Arcn1	3	4	53780.3	120356	1.16216	3.25265	2.97507
Q8CHG5	Arel1	Apoptosis-resistant E3 ubiquitin protein ligase 1	AREL1_MOUSE	94198.7	5	5	3	2	4	3	3	516640	606202	291507	102183	274901	225453	432597	Q8CHG5	Arel1	94198.7		94198.7	Arel1	290.366	365.857	191.453	60.4746	116.426	99.3634	169.368	Arel1	2.1285	2.18253	1.13709	0.466013	1.56096	1.25662	1.94472	Q8CHG5	Arel1	3	4	128.386	227.038	0.822444	0.347573	0.602254
P84078	Arf1	ADP-ribosylation factor 1	ARF1_MOUSE	20696.8	10	12	11	11	17	17	17	366551648	449059392	375542240	294279072	243538080	250447728	312664992	P84078	Arf1	20696.8		20696.8	Arf1	937638	1.2335e+06	1.12257e+06	792676	469444	502377	557148	Arf1	6873.26	7358.49	6667.26	6108.31	6293.95	6353.4	6397.28	P84078	Arf1	3	4	509656	1.0216e+06	1.00323	2.58248	2.51324
Q8BSL7	Arf2	ADP-ribosylation factor 2	ARF2_MOUSE	20745.8	1	1	1	1	0	3	2	215701	183850	137920	134456	NaN	89892.9	97763.4	Q8BSL7	Arf2	20745.8		20745.8	Arf2	550.458	503.817	411.297	361.317		179.891	173.796	Arf2	4.03508	3.00553	2.4428	2.78428		2.27503	1.99556	Q8BSL7	Arf2	2	4	176.844	456.722	1.36884	2.54079	2.48099
P61750	Arf4	ADP-ribosylation factor 4	ARF4_MOUSE	20396.6	3	4	3	3	5	5	5	26355762	81344424	22106876	16047096	29667226	28144934	39549344	P61750	Arf4	20396.6		20396.6	Arf4	68410	226730	67054.4	43860.8	58028	57287.2	71511.3	Arf4	501.472	1352.56	398.254	337.989	777.996	724.491	821.106	P61750	Arf4	3	4	62275.5	101514	0.704939	0.273162	0.534645
P84084	Arf5	ADP-ribosylation factor 5	ARF5_MOUSE	20529.7	6	6	6	6	9	9	10	40439556	39329244	41059396	32799940	26413578	27345008	32776786	P84084	Arf5	20529.7		20529.7	Arf5	104286	108911	123734	89069.7	51329.2	55298.3	58881.5	Arf5	764.46	649.713	734.89	686.365	688.184	699.339	676.088	P84084	Arf5	3	4	55169.7	106500	0.948911	3.17996	2.9326
P62331	Arf6	ADP-ribosylation factor 6	ARF6_MOUSE	20082.2	7	7	7	7	10	10	11	46531800	52135512	49574336	40727992	33706092	35783636	49773160	P62331	Arf6	20082.2		20082.2	Arf6	122671	147592	152723	113063	66960.3	73975.8	91406.8	Arf6	899.227	880.462	907.064	871.258	897.753	935.547	1049.55	P62331	Arf6	3	4	77447.6	134012	0.791073	2.30129	2.296
Q9EPJ9	Arfgap1	ADP-ribosylation factor GTPase-activating protein 1	ARFG1_MOUSE	45288.2	16	17	16	16	18	18	15	15577477	16981524	16261425	14124555	10812706	10348290	12305944	Q9EPJ9	Arfgap1	45288.2		45288.2	Arfgap1	18210.2	21317.2	22214.2	17387.1	9525.07	9486.34	10021.3	Arfgap1	133.488	127.168	131.936	133.984	127.705	119.971	115.066	Q9EPJ9	Arfgap1	3	4	9677.56	19782.2	1.03149	3.74123	3.25505
Q99K28;Q99K28-2	Arfgap2	ADP-ribosylation factor GTPase-activating protein 2;Isoform 2 of ADP-ribosylation factor GTPase-activating protein 2	ARFG2_MOUSE	56598.34;56598.34-2	25	25	25	24	24	24	22	32170272	37984484	34772564	28184072	12934827	13179040	16856840	Q99K28	Arfgap2	56598.3		56598.3	Arfgap2	30092.2	38154.2	38009.4	27761.2	9117.5	9667.08	10984.1	Arfgap2	220.587	227.609	225.748	213.926	122.241	122.256	126.122	Q99K28	Arfgap2	3	4	9922.91	33504.2	1.75551	4.03179	3.3827
Q9D8S3	Arfgap3	ADP-ribosylation factor GTPase-activating protein 3	ARFG3_MOUSE	57455.8	12	12	13	12	11	11	8	9854413	7.84519e+06	7534303	6671191	3.00155e+06	3.77843e+06	3.50723e+06	Q9D8S3	Arfgap3	57455.8		57455.8	Arfgap3	9080.27	7762.63	8112.73	6473.03	2084.15	2730.19	2251.25	Arfgap3	66.562	46.3081	48.1837	49.8808	27.9428	34.5278	25.8493	Q9D8S3	Arfgap3	3	4	2355.2	7857.17	1.73816	4.01415	3.37749
G3X9K3	Arfgef1	Brefeldin A-inhibited guanine nucleotide-exchange protein 1	BIG1_MOUSE	208500	67	65	69	64	68	69	69	40271676	47527708	42683712	37906084	28343410	29848342	38589620	G3X9K3	Arfgef1	208500		208500	Arfgef1	10225.8	12959.3	12665.3	10135.4	5423.32	5943.33	6825.88	Arfgef1	74.959	77.3087	75.2225	78.1029	72.7118	75.1633	78.376	G3X9K3	Arfgef1	3	4	6064.18	11496.4	0.922803	2.92086	2.75681
A2A5R2	Arfgef2	Brefeldin A-inhibited guanine nucleotide-exchange protein 2	BIG2_MOUSE	202240	47	47	49	48	47	48	47	20416522	24995720	21767872	20172880	14132212	14881369	17832150	A2A5R2	Arfgef2	202240		202240	Arfgef2	5344.63	7026.5	6658.99	5560.84	2787.81	3054.86	3251.86	Arfgef2	39.1783	41.9167	39.5495	42.8514	37.3768	38.6338	37.3384	A2A5R2	Arfgef2	3	4	3031.51	6147.74	1.02002	3.31261	3.01039
G5E8V9-2	Arfip1	Isoform 2 of Arfaptin-1	ARFP1_MOUSE	38416.5	1	1	1	1	1	1	1	1.42601e+06	1.17459e+06	824407	710486	273066	299162	321208	G5E8V9	Arfip1	38416.5		38416.5	Arfip1	1965.2	1738.24	1327.65	1031.04	283.576	323.299	308.364	Arfip1	14.4057	10.3695	7.88525	7.94514	3.80198	4.08865	3.54069	G5E8V9	Arfip1	3	4	305.08	1515.53	2.31257	3.56805	3.1589	up
G5E8V9	Arfip1	Arfaptin-1	ARFP1_MOUSE	41518	17	19	19	18	20	21	20	16434052	21661532	19017476	15486920	13991247	14530582	17643932	G5E8V9	Arfip1	41518		41518	Arfip1	20956.1	29661.4	28338.3	20795.4	13444.3	14529.9	15673	Arfip1	153.616	176.946	168.309	160.248	180.251	183.754	179.96	G5E8V9	Arfip1	3	4	14549.1	24937.8	0.777408	2.17085	2.19222
Q8K221	Arfip2	Arfaptin-2	ARFP2_MOUSE	37772.6	7	8	8	9	4	4	4	1.47318e+06	2.3482e+06	2.23154e+06	1739756	355202	427134	554533	Q8K221	Arfip2	37772.6		37772.6	Arfip2	2064.82	3534.25	3655	2567.73	375.161	469.464	541.432	Arfip2	15.136	21.0836	21.708	19.7868	5.02988	5.93716	6.21682	Q8K221	Arfip2	3	4	462.019	2955.45	2.67735	3.76434	3.26815	up
Q8BXL7	Arfrp1	ADP-ribosylation factor-related protein 1	ARFRP_MOUSE	22659.1	10	10	10	8	7	7	8	14102457	7.82474e+06	9370916	10752798	2.53637e+06	3.87218e+06	2.68578e+06	Q8BXL7	Arfrp1	22659.1		22659.1	Arfrp1	32950	19632.1	25585.7	26455.6	4465.69	7094.62	4371.41	Arfrp1	241.536	117.116	151.961	203.865	59.8726	89.7232	50.1933	Q8BXL7	Arfrp1	3	4	5310.57	26155.9	2.30019	3.50171	3.12365	up
Q61176	Arg1	Arginase-1	ARGI1_MOUSE	34807.9	3	3	3	3	3	3	3	918595	1.46622e+06	953948	769249	819952	685943	3670025	Q61176	Arg1	34807.9		34807.9	Arg1	1397.17	2394.76	1695.53	1232.05	939.789	818.136	3888.53	Arg1	10.2418	14.286	10.0702	9.49409	12.6	10.3467	44.6488	Q61176	Arg1	3	4	1882.15	1679.88	-0.164027	0.0974773	0.380249
Q3UL36	Arglu1	Arginine and glutamate-rich protein 1	ARGL1_MOUSE	32887	8	7	6	6	8	8	8	12196605	15558693	13924418	12733071	11797351	14275257	16469688	Q3UL36	Arglu1	32887		32887	Arglu1	19634.4	26896	26194.6	21584.8	14311.3	18020.8	18469.5	Arglu1	143.928	160.449	155.576	166.331	191.875	227.903	212.07	Q3UL36	Arglu1	3	4	16933.9	23577.4	0.477494	1.47907	1.615
Q5FWK3	Arhgap1	Rho GTPase-activating protein 1	RHG01_MOUSE	50410.7	22	22	22	21	24	23	24	45212668	44389524	43346148	42367208	45648132	39988616	48788240	Q5FWK3	Arhgap1	50410.7		50410.7	Arhgap1	47483.2	50060.7	53196.9	46853.9	36126	32932.8	35693.3	Arhgap1	348.071	298.638	315.951	361.053	484.35	416.49	409.837	Q5FWK3	Arhgap1	3	4	34917.4	49398.7	0.500528	3.37265	3.04694
Q80Y19	Arhgap11a	Rho GTPase-activating protein 11A	RHGBA_MOUSE	108436	3	7	10	2	2	2	3	174140	1.35792e+06	2.48969e+06	903096	79291.8	95546.6	838582	Q80Y19	Arhgap11a	108436		108436	Arhgap11a	85.0215	711.937	1420.47	464.301	29.1726	36.5812	285.211	Arhgap11a	0.623241	4.24707	8.43654	3.57787	0.391124	0.46263	3.27485	Q80Y19	Arhgap11a	3	4	116.988	670.432	2.51873	1.00794	1.19504
Q8C0D4	Arhgap12	Rho GTPase-activating protein 12	RHG12_MOUSE	95352.4	15	14	12	10	11	11	11	2.79547e+06	3.15117e+06	2.81505e+06	2.01211e+06	1.59687e+06	1.39183e+06	1.62017e+06	Q8C0D4	Arhgap12	95352.4		95352.4	Arhgap12	1552.12	1878.79	1826.47	1176.41	668.126	605.995	626.647	Arhgap12	11.3776	11.208	10.8479	9.06534	8.95772	7.66382	7.19528	Q8C0D4	Arhgap12	3	4	633.589	1608.45	1.34405	3.06201	2.85599
Q811M1	Arhgap15	Rho GTPase-activating protein 15	RHG15_MOUSE	55339.2	17	18	19	17	22	22	22	10917671	11605062	14551942	9351141	17453348	16187217	21304030	Q811M1	Arhgap15	55339.2		55339.2	Arhgap15	10444.8	11922.1	16268.4	9420.41	12582.4	12143.8	14197.8	Arhgap15	76.5644	71.1216	96.6227	72.5931	168.696	153.578	163.022	Q811M1	Arhgap15	3	4	12974.7	12013.9	-0.11099	0.270041	0.532114
Q3UIA2	Arhgap17	Rho GTPase-activating protein 17	RHG17_MOUSE	92202.1	39	38	40	37	39	42	41	77329752	91476432	77777624	65908188	75653456	82470152	110261016	Q3UIA2	Arhgap17	92202.1		92202.1	Arhgap17	44402.6	56403.7	52188.2	39850.8	32734.6	37133.9	44103.7	Arhgap17	325.488	336.477	309.959	307.088	438.881	469.62	506.407	Q3UIA2	Arhgap17	3	4	37990.7	48211.3	0.343724	0.998977	1.18664
Q3UIA2-3	Arhgap17	Isoform 3 of Rho GTPase-activating protein 17	RHG17_MOUSE	81032.8	2	0	0	0	0	2	2	438725	NaN	NaN	NaN	NaN	824854	410312	Q3UIA2	Arhgap17	81032.8		81032.8	Arhgap17	286.638					422.602	186.744	Arhgap17	2.10117					5.34451	2.14423	Q3UIA2	Arhgap17	2	1	304.673	286.638	-0.0880332	0.0079407	0.302529
Q8K0Q5	Arhgap18	Rho GTPase-activating protein 18	RHG18_MOUSE	74930.2	4	4	3	2	10	13	14	1.29968e+06	993990	594849	313033	2886745	2.84395e+06	4.06239e+06	Q8K0Q5	Arhgap18	74930.2		74930.2	Arhgap18	918.292	754.162	491.143	232.901	1536.99	1575.72	1999.49	Arhgap18	6.73144	4.49896	2.91703	1.79472	20.6068	19.9276	22.9585	Q8K0Q5	Arhgap18	3	4	1704.07	599.124	-1.50805	1.60296	1.72113
Q8C4V1	Arhgap24	Rho GTPase-activating protein 24	RHG24_MOUSE	84100	1	4	5	3	7	8	4	64476.1	881032	993411	318820	1.11429e+06	1464908	1.21478e+06	Q8C4V1	Arhgap24	84100		84100	Arhgap24	40.5887	595.573	730.788	211.343	528.591	723.152	532.717	Arhgap24	0.297531	3.5529	4.34034	1.62859	7.08694	9.14546	6.11676	Q8C4V1	Arhgap24	3	4	594.82	394.573	-0.59216	0.494303	0.734983
Q8BYW1	Arhgap25	Rho GTPase-activating protein 25	RHG25_MOUSE	73382.7	37	37	41	38	47	45	48	88182424	97806848	92908584	81763328	107024808	106989568	134141968	Q8BYW1	Arhgap25	73382.7		73382.7	Arhgap25	63619.5	75773.1	78328.6	62116	58184.8	60528.9	67416.2	Arhgap25	466.356	452.025	465.214	478.661	780.098	765.489	774.086	Q8BYW1	Arhgap25	3	4	62043.3	69959.3	0.17324	0.697741	0.917943
Q8BYW1-3	Arhgap25	Isoform 3 of Rho GTPase-activating protein 25	RHG25_MOUSE	70382.2	1	0	0	1	2	0	2	331392	NaN	NaN	351840	402810	NaN	742724	Q8BYW1	Arhgap25	70382.2		70382.2	Arhgap25	249.277			278.69	228.327		389.187	Arhgap25	1.8273			2.14756	3.06123		4.46872	Q8BYW1	Arhgap25	2	2	308.757	263.983	-0.226025	0.157607	0.432192
Q8BYW1-2	Arhgap25	Isoform 2 of Rho GTPase-activating protein 25	RHG25_MOUSE	62873.6	1	0	0	1	0	0	0	216706	NaN	NaN	259149	NaN	NaN	NaN	Q8BYW1	Arhgap25	62873.6		62873.6	Arhgap25	182.475			229.784				Arhgap25	1.33762			1.7707				Q8BYW1	Arhgap25		2		206.13
Q6ZQ82	Arhgap26	Rho GTPase-activating protein 26	RHG26_MOUSE	92070.6	20	20	24	22	25	27	25	11077572	14025015	12550376	8890811	12282651	14160226	15739137	Q6ZQ82	Arhgap26	92070.6		92070.6	Arhgap26	6369.8	8660.08	8433.23	5383.43	5322.19	6385.05	6304.54	Arhgap26	46.6932	51.6618	50.0872	41.4843	71.3559	80.7496	72.3899	Q6ZQ82	Arhgap26	3	4	6003.93	7211.64	0.26442	0.525987	0.763978
A2AB59-2	Arhgap27	Isoform 2 of Rho GTPase-activating protein 27	RHG27_MOUSE	75801.9	19	19	21	19	19	19	19	10871439	12176761	10914668	8861891	9116780	9048481	11378864	A2AB59	Arhgap27	75801.9		75801.9	Arhgap27	7592.93	9132.53	8908.18	6517.56	4798.22	4955.77	5536.21	Arhgap27	55.6592	54.4802	52.908	50.2239	64.331	62.6739	63.5678	A2AB59	Arhgap27	3	4	5096.73	8037.8	0.657227	2.19503	2.21216
Q640N3;Q640N3-2	Arhgap30	Rho GTPase-activating protein 30;Isoform 2 of Rho GTPase-activating protein 30	RHG30_MOUSE	120114.41;120114.41-2	36	38	39	37	38	39	34	56213944	68300456	59791408	50725832	39133324	46229720	49319864	Q640N3	Arhgap30	120114		120114	Arhgap30	24777.1	32327.2	30796.5	23543.6	12997.8	15978.7	15143.3	Arhgap30	181.626	192.848	182.909	181.425	174.265	202.077	173.878	Q640N3	Arhgap30	3	4	14706.6	27861.1	0.921788	2.72046	2.61495
Q80Z68;Q8VHL8	Arhgap4	Q80Rho GTPase activating protein 4;Q8Rho GTPase-activating protein p115	Q80Z68_MO;Q8VHL8_MOU	106450.66;106509.77	39	41	39	38	51	51	51	55197336	56089012	54692856	51230476	77213416	87413104	90132000	Q80Z68	Arhgap4	106451		106451	Arhgap4	27451.9	29955	31786.3	26829.9	28937.7	34091.3	31226.6	Arhgap4	201.233	178.697	188.788	206.749	387.974	431.141	358.549	Q80Z68	Arhgap4	3	4	31418.5	29005.8	-0.115275	0.606924	0.835319
Q3TBD2	Arhgap45	Rho GTPase-activating protein 45	HMHA1_MOUSE	122902	50	49	50	50	63	63	64	114792096	141354544	114742024	110760016	151795120	172474048	216921152	Q3TBD2	Arhgap45	122902		122902	Arhgap45	49448.7	65386.7	57759.2	50241.4	49274	58261.2	65093.3	Arhgap45	362.478	390.066	343.047	387.157	660.628	736.81	747.413	Q3TBD2	Arhgap45	3	4	57542.8	55709	-0.0467248	0.116086	0.396481
P97393	Arhgap5	Rho GTPase-activating protein 5	RHG05_MOUSE	172472	4	6	8	6	0	0	0	420416	515189	785885	497678	NaN	NaN	NaN	P97393	Arhgap5	172472		172472	Arhgap5	129.051	169.82	281.903	160.867				Arhgap5	0.945998	1.01306	1.67429	1.23963				P97393	Arhgap5		4		185.41				up-a
O54834;O54834-2;O54834-3;O54834-4	Arhgap6	Rho GTPase-activating protein 6;Isoform 2 of Rho GTPase-activating protein 6;Isoform 3 of Rho GTPase-activating protein 6;Isoform 4 of Rho GTPase-activating protein 6	RHG06_MOUSE	108843.95;108843.95-2;108843.95-3;108843.95-4	0	0	0	0	0	1	1	NaN	NaN	NaN	NaN	NaN	46936.3	78231.3	O54834	Arhgap6	108844		108844	Arhgap6						17.9028	26.5076	Arhgap6						0.22641	0.304365	O54834	Arhgap6	2		22.2052
Q8QZW8	Arhgap9	Q8Rho GTPase activating protein 9	Q8QZW8_MOU	53113.4	13	14	16	16	16	17	15	10392271	14164320	12351320	10573062	19808792	20588288	22210916	Q8QZW8	Arhgap9	53113.4		53113.4	Arhgap9	10358.8	15161.1	14386.9	11097.8	14879	16092.8	15422.5	Arhgap9	75.934	90.4438	85.4477	85.5186	199.486	203.52	177.085	Q8QZW8	Arhgap9	3	4	15464.8	12751.1	-0.278359	0.891628	1.0917
Q99PT1	Arhgdia	Rho GDP-dissociation inhibitor 1	GDIR1_MOUSE	23407.4	13	14	14	13	15	15	16	886778432	974678848	952756160	864097856	822586304	829349888	1164194816	Q99PT1	Arhgdia	23407.4		23407.4	Arhgdia	2.00569e+06	2.36727e+06	2.51818e+06	2.05801e+06	1.402e+06	1.47096e+06	1.83428e+06	Arhgdia	14702.5	14122	14956.1	15858.9	18796.9	18602.7	21061.6	Q99PT1	Arhgdia	3	4	1.56908e+06	2.23729e+06	0.511834	1.88392	1.96041
Q61599	Arhgdib	Rho GDP-dissociation inhibitor 2	GDIR2_MOUSE	22850.9	20	20	21	20	24	24	23	1003464128	1192467456	1031435072	974163584	984902400	1170977280	1799136000	Q61599	Arhgdib	22850.9		22850.9	Arhgdib	2.32488e+06	2.96676e+06	2.79253e+06	2.37666e+06	1.71953e+06	2.12746e+06	2.90372e+06	Arhgdib	17042.3	17698.3	16585.6	18314.4	23054.1	26905.2	33341.1	Q61599	Arhgdib	3	4	2.25024e+06	2.61521e+06	0.21685	0.522492	0.761036
Q61210-5	Arhgef1	Isoform 5 of Rho guanine nucleotide exchange factor 1	ARHG1_MOUSE	109249	52	52	54	52	69	66	68	155168064	182822192	150601632	142261744	172157680	187147008	241910272	Q61210	Arhgef1	109249		109249	Arhgef1	75194.8	95137.5	85284.8	72595.6	62867.9	71118.3	81664.1	Arhgef1	551.208	567.544	506.529	559.417	842.885	899.41	937.683	Q61210	Arhgef1	3	4	71883.5	82053.2	0.190899	0.638989	0.864063
Q61210	Arhgef1	Rho guanine nucleotide exchange factor 1	ARHG1_MOUSE	102804	2	3	3	3	3	3	3	7.77484e+06	7671387	4.68265e+06	5005245	5460396	4.75056e+06	5848403	Q61210	Arhgef1	102804		102804	Arhgef1	4003.89	4242.3	2817.98	2714.26	2119	1918.44	2098.06	Arhgef1	29.3501	25.3075	16.7367	20.9159	28.41	24.2618	24.0904	Q61210	Arhgef1	3	4	2045.17	3444.61	0.75212	1.8051	1.89444
E9Q0A3	Arhgef11	E9Q0Rho guanine nucleotide exchange factor (GEF) 11 (Fragment)	E9Q0A3_M	163508	8	6	9	5	16	19	15	1.08288e+06	820302	1630094	917486	2029886	2098501	2381399	E9Q0A3	Arhgef11	163508		163508	Arhgef11	350.624	285.216	616.782	312.823	495.28	532.825	537.139	Arhgef11	2.57022	1.70146	3.66323	2.41059	6.64035	6.73846	6.16752	E9Q0A3	Arhgef11	3	4	521.748	391.361	-0.414853	0.785002	0.995292
Q6P9R4	Arhgef18	Rho guanine nucleotide exchange factor 18	ARHGI_MOUSE	155982	32	27	29	26	54	56	54	8400513	8307060	8063007	7587566	23771502	23836740	30002972	Q6P9R4	Arhgef18	155982		155982	Arhgef18	2851.25	3027.71	3198.03	2711.86	6079.99	6344.38	7093.9	Arhgef18	20.9008	18.0618	18.9939	20.8974	81.5159	80.2352	81.4534	Q6P9R4	Arhgef18	3	4	6506.09	2947.21	-1.14244	4.44956	3.50301	down
Q60875;Q60875-4;Q60875-5	Arhgef2	Rho guanine nucleotide exchange factor 2;Isoform 4 of Rho guanine nucleotide exchange factor 2;Isoform 5 of Rho guanine nucleotide exchange factor 2	ARHG2_MOUSE	111974.36;111974.36-4;111974.36-5	43	44	47	45	49	47	48	55589800	66113692	62059760	48632788	35347736	34989360	43114872	Q60875	Arhgef2	111974		111974	Arhgef2	26283.2	33567	34288.6	24213	12594	12972.8	14200.5	Arhgef2	192.667	200.244	203.649	186.584	168.85	164.062	163.052	Q60875	Arhgef2	3	4	13255.7	29588	1.15839	3.1414	2.9064
Q91X46;Q91X46-2;Q91X46-3	Arhgef3	Rho guanine nucleotide exchange factor 3;Isoform 2 of Rho guanine nucleotide exchange factor 3;Isoform 3 of Rho guanine nucleotide exchange factor 3	ARHG3_MOUSE	59526.26;59526.26-2;59526.26-3	0	0	0	0	1	2	1	NaN	NaN	NaN	NaN	87511.3	107285	117417	Q91X46	Arhgef3	59526.3		59526.3	Arhgef3					58.6509	74.825	72.7474	Arhgef3					0.786347	0.946287	0.835299	Q91X46	Arhgef3	3		68.7411					down-a
Q8K4I3	Arhgef6	Rho guanine nucleotide exchange factor 6	ARHG6_MOUSE	87051.5	36	37	39	37	45	47	44	39487236	47683232	47543852	41265780	40968516	43100440	55465084	Q8K4I3	Arhgef6	87051.5		87051.5	Arhgef6	24015	31140.7	33789.1	26427.3	18775.6	20555.2	23498.3	Arhgef6	176.04	185.771	200.682	203.647	251.729	259.954	269.812	Q8K4I3	Arhgef6	3	4	20943	28843	0.461753	1.50158	1.63444
Q9ES28-8	Arhgef7	Isoform H of Rho guanine nucleotide exchange factor 7	ARHG7_MOUSE	79696.1	29	27	30	27	37	36	34	25542728	34091536	31983508	25673668	25114096	27598488	28721762	Q9ES28	Arhgef7	79696.1		79696.1	Arhgef7	16968.1	24319.2	24828.3	17959.3	12571.9	14376.8	13291.3	Arhgef7	124.383	145.076	147.462	138.393	168.554	181.819	152.613	Q9ES28	Arhgef7	3	4	13413.3	21018.7	0.648006	1.79471	1.8858
A2BH40	Arid1a	AT-rich interactive domain-containing protein 1A	ARI1A_MOUSE	242092	70	69	73	70	76	78	73	68042960	74049200	65675168	52872624	58728680	59245008	67823648	A2BH40	Arid1a	242092		242092	Arid1a	14880.1	17389.2	16783.4	12175.6	9678.09	10159.8	10332.3	Arid1a	109.077	103.736	99.681	93.8242	129.756	128.488	118.637	A2BH40	Arid1a	3	4	10056.7	15307.1	0.606037	2.09527	2.13329
A2BH40-2;A2BH40-4	Arid1a	Isoform 2 of AT-rich interactive domain-containing protein 1A;Isoform 4 of AT-rich interactive domain-containing protein 1A	ARI1A_MOUSE	206487.52;206400.45	2	2	2	2	2	2	2	515069	533617	346596	468628	518769	399658	368096	A2BH40	Arid1a	206488		206488	Arid1a	132.061	146.918	103.846	126.524	100.23	80.3545	65.7448	Arid1a	0.968057	0.876442	0.616768	0.974985	1.34381	1.01622	0.754894	A2BH40	Arid1a	3	4	82.1099	127.337	0.633025	1.69027	1.79642
E9Q4N7	Arid1b	AT-rich interactive domain-containing protein 1B	ARI1B_MOUSE	242882	41	43	46	40	48	51	47	25368708	28725440	23851414	20485542	22241758	22129638	26024824	E9Q4N7	Arid1b	242882		242882	Arid1b	5529.75	6723.74	6075.43	4702.09	3653.36	3782.63	3951.72	Arid1b	40.5353	40.1106	36.0836	36.234	48.9816	47.8377	45.3744	E9Q4N7	Arid1b	3	4	3795.91	5757.75	0.601061	2.17215	2.19318
E9Q7E2	Arid2	AT-rich interactive domain-containing protein 2	ARID2_MOUSE	195988	30	30	29	29	31	29	31	10507238	12935495	10857990	9032320	7.29578e+06	7124724	8657258	E9Q7E2	Arid2	195988		195988	Arid2	2838.31	3752.25	3427.5	2569.26	1485.12	1509.22	1629.08	Arid2	20.806	22.3841	20.3568	19.7985	19.9113	19.0866	18.7055	E9Q7E2	Arid2	3	4	1541.14	3146.83	1.0299	2.95152	2.7783
Q62431	Arid3a	AT-rich interactive domain-containing protein 3A	ARI3A_MOUSE	64172.7	19	20	20	19	17	16	17	11166636	14369889	13302847	9824865	4588737	5.13555e+06	5675512	Q62431	Arid3a	64172.7		64172.7	Arid3a	9212.43	12730.4	12824.9	8535.22	2852.74	3322.4	3261.73	Arid3a	67.5308	75.9434	76.1703	65.7718	38.2474	42.0173	37.4518	Q62431	Arid3a	3	4	3145.62	10825.7	1.78305	3.59968	3.17777
Q9Z1N7	Arid3b	AT-rich interactive domain-containing protein 3B	ARI3B_MOUSE	61015.4	7	8	7	10	10	9	10	1.72743e+06	2332778	1.59387e+06	2.42167e+06	1.85223e+06	1284581	1.96278e+06	Q9Z1N7	Arid3b	61015.4		61015.4	Arid3b	1498.87	2173.57	1616.11	2212.66	1211.08	874.052	1186.38	Arid3b	10.9873	12.9664	9.59852	17.0506	16.2373	11.0538	13.6223	Q9Z1N7	Arid3b	3	4	1090.51	1875.3	0.782125	1.82616	1.91138
F8VPQ2	Arid4a	AT-rich interactive domain-containing protein 4A	ARI4A_MOUSE	142055	22	20	23	22	29	32	31	6.74052e+06	6651710	7040541	6.4037e+06	8.15335e+06	10451139	11910715	F8VPQ2	Arid4a	142055		142055	Arid4a	2512.11	2662.05	3066.25	2513.11	2289.8	3054.37	3092.25	Arid4a	18.4147	15.8805	18.2113	19.3659	30.6999	38.6276	35.5058	F8VPQ2	Arid4a	3	4	2812.14	2688.38	-0.064932	0.148954	0.424681
A2CG63	Arid4b	AT-rich interactive domain-containing protein 4B	ARI4B_MOUSE	147643	24	22	22	22	21	26	24	6.38164e+06	7.66202e+06	6274266	5786080	4.1489e+06	5.31201e+06	6.85428e+06	A2CG63	Arid4b	147643		147643	Arid4b	2288.34	2950.33	2629.11	2184.79	1121.09	1493.69	1712.15	Arid4b	16.7745	17.6002	15.615	16.8359	15.0307	18.8902	19.6593	A2CG63	Arid4b	3	4	1442.31	2513.14	0.80111	2.09929	2.13653
Q3U108;Q3U108-2;Q3U108-3;Q3U108-4	Arid5a	AT-rich interactive domain-containing protein 5A;Isoform 2 of AT-rich interactive domain-containing protein 5A;Isoform 3 of AT-rich interactive domain-containing protein 5A;Isoform 4 of AT-rich interactive domain-containing protein 5A	ARI5A_MOUSE	63898.49;63898.49-2;63898.49-3;63898.49-4	5	6	8	8	3	8	5	1.32419e+06	3.1152e+06	2.31955e+06	1.8992e+06	282644	1.88507e+06	442083	Q3U108	Arid5a	63898.5		63898.5	Arid5a	1097.14	2771.62	2245.8	1656.99	176.469	1224.76	255.157	Arid5a	8.04249	16.5342	13.3384	12.7686	2.36596	15.4892	2.92976	Q3U108	Arid5a	3	4	552.129	1942.89	1.81512	1.44774	1.58741
Q8BM75	Arid5b	AT-rich interactive domain-containing protein 5B	ARI5B_MOUSE	131837	5	5	4	2	4	4	4	505228	519236	471499	238433	299719	274364	360630	Q8BM75	Arid5b	131837		131837	Arid5b	202.886	223.907	221.26	100.825	90.6976	86.3984	100.883	Arid5b	1.48724	1.33572	1.31412	0.776951	1.21601	1.09265	1.15836	Q8BM75	Arid5b	3	4	92.6597	187.219	1.01472	1.45101	1.59034
Q9Z1K5	Arih1	E3 ubiquitin-protein ligase ARIH1	ARI1_MOUSE	64016.7	27	26	25	25	25	25	26	29333164	39127916	37291092	30405154	20160118	18507520	26743762	Q9Z1K5	Arih1	64016.7		64016.7	Arih1	24258.7	34748.3	36038.8	26478.5	12563.7	12002.5	15407.2	Arih1	177.826	207.291	214.044	204.041	168.445	151.791	176.908	Q9Z1K5	Arih1	3	4	13324.5	30381.1	1.1891	2.77905	2.65736
Q9Z1K6	Arih2	E3 ubiquitin-protein ligase ARIH2	ARI2_MOUSE	57696.8	12	15	12	9	18	17	17	4910052	5.84883e+06	7894936	4399849	6327815	5686711	6715812	Q9Z1K6	Arih2	57696.8		57696.8	Arih2	4505.44	5763.11	8465.55	4251.33	4375.44	4091.9	4292.8	Arih2	33.0266	34.3799	50.2792	32.7605	58.6625	51.7489	49.2907	Q9Z1K6	Arih2	3	4	4253.38	5746.36	0.434039	0.663585	0.886229
Q8BH50;Q8BH50-2	ARK2N	Protein ARK2N;Isoform 2 of Protein ARK2N	ARK2N_MOUSE	26445.74;26445.74-2	5	4	4	4	3	4	2	1.91972e+06	1294506	1.24478e+06	663864	777975	443937	1.20933e+06	Q8BH50	ARK2N	26445.7		26445.7	ARK2N	3843.13	2782.84	2912.02	1399.46	1173.62	696.916	1686.48	ARK2N	28.1717	16.6011	17.2953	10.7842	15.7351	8.81367	19.3645	Q8BH50	ARK2N	3	4	1185.67	2734.36	1.2055	1.27175	1.43192
P61211	Arl1	ADP-ribosylation factor-like protein 1	ARL1_MOUSE	20411.6	9	11	9	10	10	11	9	32140488	30388670	34926556	26406522	10491024	16080808	18340252	P61211	Arl1	20411.6		20411.6	Arl1	83364	84639.9	105861	72123	20505	32707.5	33137.7	Arl1	611.091	504.92	628.739	555.775	274.916	413.64	380.494	P61211	Arl1	3	4	28783.4	86497.1	1.58741	3.00311	2.8152
Q8BIX3	Arl14ep	ARL14 effector protein	AL14E_MOUSE	31010.6	8	6	6	7	9	9	8	2.78316e+06	2.89784e+06	2.67107e+06	2184731	2.70543e+06	2.51093e+06	3212126	Q8BIX3	Arl14ep	31010.6		31010.6	Arl14ep	4751.5	5312.55	5328.86	3927.59	3480.53	3361.56	3820.11	Arl14ep	34.8303	31.6921	31.6495	30.2658	46.6643	42.5125	43.8633	Q8BIX3	Arl14ep	3	4	3554.07	4830.13	0.44259	1.67837	1.78657
Q9D0J4	Arl2	ADP-ribosylation factor-like protein 2	ARL2_MOUSE	20863.9	9	8	10	10	9	10	10	8955565	9435092	10168999	7839180	3.93772e+06	4431529	4911794	Q9D0J4	Arl2	20863.9		20863.9	Arl2	22724.8	25709.3	30153.7	20946.6	7529.54	8818.06	8682.36	Arl2	166.582	153.369	179.091	161.413	100.95	111.519	99.6925	Q9D0J4	Arl2	3	4	8343.32	24883.6	1.5765	3.88009	3.32382
Q9D385;Q9D385-2	Arl2bp	ADP-ribosylation factor-like protein 2-binding protein;Isoform 2 of ADP-ribosylation factor-like protein 2-binding protein	AR2BP_MOUSE	18753.93;18753.93-2	0	0	4	3	5	5	5	NaN	NaN	742138	498258	1.12486e+06	917212	1.16243e+06	Q9D385	Arl2bp	18753.9		18753.9	Arl2bp			2448.22	1481.16	2392.91	2030.45	2285.96	Arl2bp			14.5406	11.4137	32.0823	25.6785	26.2478	Q9D385	Arl2bp	3	2	2236.44	1964.69	-0.186903	0.317457	0.575027
Q9WUL7	Arl3	ADP-ribosylation factor-like protein 3	ARL3_MOUSE	20486.5	7	7	7	7	6	8	7	7969290	10110835	8.37421e+06	6.88064e+06	2899067	3.66954e+06	4875870	Q9WUL7	Arl3	20486.5		20486.5	Arl3	20594.6	28058.1	25289.1	18724	5645.58	7436.33	8777.63	Arl3	150.967	167.381	150.199	144.286	75.6917	94.0447	100.786	Q9WUL7	Arl3	3	4	7286.51	23166.5	1.66874	3.1901	2.93791
Q80ZU0	Arl5a	ADP-ribosylation factor-like protein 5A	ARL5A_MOUSE	20723.9	3	3	3	3	3	3	3	1501084	2.03203e+06	1.77812e+06	1.40769e+06	1.27133e+06	1.07447e+06	1.35056e+06	Q80ZU0	Arl5a	20723.9		20723.9	Arl5a	3834.73	5574.4	5308.2	3786.8	2447.4	2152.47	2403.45	Arl5a	28.1101	33.2541	31.5268	29.1808	32.813	27.2216	27.5968	Q80ZU0	Arl5a	3	4	2334.44	4626.03	0.986698	2.49042	2.44454
O88848;O88848-2	Arl6	ADP-ribosylation factor-like protein 6;Isoform 2 of ADP-ribosylation factor-like protein 6	ARL6_MOUSE	20959.28;20959.28-2	2	3	4	3	0	0	1	286933	538164	682299	448906	NaN	NaN	33123.9	O88848	Arl6	20959.3		20959.3	Arl6	724.781	1459.75	2013.99	1194.04			58.2852	Arl6	5.31293	8.70814	11.9616	9.20117			0.669242	O88848	Arl6	1	4	58.2852	1348.14	4.53169	2.11651	2.15022	up
Q9JKW0	Arl6ip1	AR6ADP-ribosylation factor-like protein 6-interacting protein 1	AR6P1_MO	23436.9	3	2	2	3	3	4	4	2458917	1.84265e+06	2378108	1.77845e+06	1.09923e+06	1794573	1756793	Q9JKW0	Arl6ip1	23436.9		23436.9	Arl6ip1	5554.52	4469.75	6277.55	4230.39	1871.14	3178.9	2764.49	Arl6ip1	40.7168	26.6643	37.284	32.5991	25.0869	40.2024	31.7423	Q9JKW0	Arl6ip1	3	4	2604.84	5133.05	0.97862	1.99005	2.04935
Q9JM93	Arl6ip4	AR6ADP-ribosylation factor-like protein 6-interacting protein 4	AR6P4_MO	25524.7	6	5	5	4	6	6	7	2.77769e+06	5.07897e+06	3878484	3.38243e+06	1.68906e+06	2.10132e+06	3.35462e+06	Q9JM93	Arl6ip4	25524.7		25524.7	Arl6ip4	5761.36	11312.4	9400.67	7387.65	2639.99	3417.8	4847.03	Arl6ip4	42.2331	67.4841	55.8331	56.9287	35.395	43.2237	55.6545	Q9JM93	Arl6ip4	3	4	3634.94	8465.51	1.21967	1.86038	1.94076
Q8R5J9	Arl6ip5	PRA1 family protein 3	PRAF3_MOUSE	21557.7	7	7	7	7	8	8	8	36459876	41186684	27149264	28944090	26298022	27027148	43865296	Q8R5J9	Arl6ip5	21557.7		21557.7	Arl6ip5	89539.7	108616	77913.8	74850.8	48667.6	52049.1	75043.5	Arl6ip5	656.362	647.951	462.751	576.795	652.499	658.248	861.663	Q8R5J9	Arl6ip5	3	4	58586.8	87730.1	0.582498	1.38937	1.53525
Q8BH07	Arl6ip6	AR6ADP-ribosylation factor-like protein 6-interacting protein 6	AR6P6_MO	24908.6	4	4	3	3	3	3	2	1.42826e+06	992621	733050	587657	1.11657e+06	947956	915966	Q8BH07	Arl6ip6	24908.6		24908.6	Arl6ip6	3035.71	2265.55	1820.72	1315.26	1788.36	1579.99	1356.2	Arl6ip6	22.2529	13.5152	10.8137	10.1353	23.977	19.9816	15.5721	Q8BH07	Arl6ip6	3	4	1574.85	2109.31	0.421557	0.520627	0.75931
Q8VEH3	Arl8a	ADP-ribosylation factor-like protein 8A	ARL8A_MOUSE	21389.8	11	11	11	11	14	14	14	53222152	63488624	57600916	53838476	52759176	43634488	57821136	Q8VEH3	Arl8a	21389.8		21389.8	Arl8a	131731	168744	166602	140321	98403.2	84691	99694.8	Arl8a	965.638	1006.64	989.493	1081.31	1319.32	1071.06	1144.71	Q8VEH3	Arl8a	3	4	94263	151849	0.687877	2.5835	2.51398
Q9CQW2	Arl8b	ADP-ribosylation factor-like protein 8B	ARL8B_MOUSE	21539	6	6	6	6	6	6	6	29018852	37278468	34735004	30466410	26085150	27101980	33745324	Q9CQW2	Arl8b	21539		21539	Arl8b	71327.5	98394.7	99770	78855.9	48315.5	52238.5	57780.5	Arl8b	522.859	586.975	592.561	607.658	647.778	660.642	663.447	Q9CQW2	Arl8b	3	4	52778.2	87087	0.722516	2.23171	2.24039
Q9D7A8	Armc1	Armadillo repeat-containing protein 1	ARMC1_MOUSE	31246.5	9	9	9	10	11	12	13	6.95149e+06	8773872	7.8007e+06	8159929	4.02837e+06	3.9911e+06	5830936	Q9D7A8	Armc1	31246.5		31246.5	Armc1	11778.2	15963.5	15445.1	14558.7	5143.36	5302.81	6882.24	Armc1	86.3388	95.2306	91.7325	112.188	68.9583	67.0629	79.0232	Q9D7A8	Armc1	3	4	5776.14	14436.4	1.32153	3.3597	3.03985
Q9D0L7;Q9D0L7-2	Armc10	Armadillo repeat-containing protein 10;Isoform 2 of Armadillo repeat-containing protein 10	ARM10_MOUSE	33310.51;33310.51-2	11	11	10	10	13	12	13	26885880	31868716	29240294	25190560	29081250	30467196	36033228	Q9D0L7	Armc10	33310.5		33310.5	Armc10	42731.2	54390.5	54307.4	42159.5	34829.8	37972.3	39894.7	Armc10	313.237	324.467	322.546	324.878	466.972	480.222	458.079	Q9D0L7	Armc10	3	4	37565.6	48397.1	0.365509	1.38093	1.52826
Q5EBP3	Armc5	Armadillo repeat-containing protein 5	ARMC5_MOUSE	96727.8	3	3	6	6	2	3	3	611475	560731	1.3673e+06	1.07607e+06	169930	253923	365003	Q5EBP3	Armc5	96727.8		96727.8	Armc5	334.68	329.566	874.522	620.195	70.087	108.985	139.168	Armc5	2.45334	1.96603	5.19402	4.77918	0.939673	1.37829	1.59795	Q5EBP3	Armc5	3	4	106.08	539.741	2.34712	2.30278	2.29664	up
Q8BNU0	Armc6	Armadillo repeat-containing protein 6	ARMC6_MOUSE	50683.2	12	15	14	13	11	12	11	5.92451e+06	10499112	13245716	6501982	2.38535e+06	3.35625e+06	4.22085e+06	Q8BNU0	Armc6	50683.2		50683.2	Armc6	6188.57	11776.8	16168.5	7151.87	1877.61	2749.2	3071.35	Armc6	45.3647	70.2547	96.0289	55.1119	25.1736	34.7681	35.2658	Q8BNU0	Armc6	3	4	2566.05	10321.4	2.00802	2.23318	2.24125
Q9DBR3	Armc8	Armadillo repeat-containing protein 8	ARMC8_MOUSE	75364	30	29	32	31	29	28	31	22377238	28912982	29507478	24488138	12558276	11863237	16561340	Q9DBR3	Armc8	75364		75364	Armc8	15719.7	21810.6	24222.9	18114.7	6647.91	6535.13	8104.48	Armc8	115.232	130.112	143.866	139.59	89.1302	82.6476	93.0572	Q9DBR3	Armc8	3	4	7095.84	19967	1.49257	3.31611	3.01182
Q9DBR3-2	Armc8	Isoform 2 of Armadillo repeat-containing protein 8	ARMC8_MOUSE	44456	1	1	0	1	0	1	0	246265	265803	NaN	223638	NaN	109950	NaN	Q9DBR3	Armc8	44456		44456	Armc8	293.275	339.914		280.449		102.678		Armc8	2.14982	2.02776		2.16112		1.29854		Q9DBR3	Armc8	1	3	102.678	304.546	1.56853	1.9469	2.01293
Q8BHS6	Armcx3	Armadillo repeat-containing X-linked protein 3	ARMX3_MOUSE	42619.7	3	4	4	5	0	1	0	329357	654935	510918	2.0972e+06	NaN	36808.6	NaN	Q8BHS6	Armcx3	42619.7		42619.7	Armcx3	409.127	873.629	741.65	2743.26		35.8553		Armcx3	2.99907	5.21165	4.40486	21.1394		0.45345		Q8BHS6	Armcx3	1	4	35.8553	1191.92	5.05495	1.4504	1.58982
Q6PD19	Armh3	Armadillo-like helical domain-containing protein 3	ARMD3_MOUSE	78632.3	13	15	14	14	11	15	12	5200798	6.67029e+06	5519733	5850610	4.53264e+06	5.53045e+06	4302226	Q6PD19	Armh3	78632.3		78632.3	Armh3	3501.64	4822.62	4342.86	4148	2299.69	2919.95	2017.84	Armh3	25.6684	28.7694	25.7934	31.9642	30.8325	36.9276	23.1692	Q6PD19	Armh3	3	4	2412.49	4203.78	0.801163	2.26089	2.26435
A6H630	Armt1	Damage-control phosphatase ARMT1	ARMT1_MOUSE	50548.8	23	22	23	22	27	28	28	11872011	13287625	10841593	9636897	13522097	14735413	20193592	A6H630	Armt1	50548.8		50548.8	Armt1	12434.1	14944.3	13269.1	10628.3	10672.2	12102.3	14733.2	Armt1	91.1472	89.1505	78.8086	81.9012	143.084	153.053	169.169	A6H630	Armt1	3	4	12502.5	12819	0.0360589	0.0821745	0.366752
P53762;P53762-2	Arnt	Aryl hydrocarbon receptor nuclear translocator;Isoform Short of Aryl hydrocarbon receptor nuclear translocator	ARNT_MOUSE	86962.94;86962.94-2	9	7	9	6	10	11	10	2.63938e+06	1.76056e+06	2.87354e+06	1.65291e+06	1.50874e+06	1.37084e+06	1649797	P53762	Arnt	86962.9		86962.9	Arnt	1606.83	1150.95	2044.28	1059.63	692.147	654.438	699.665	Arnt	11.7787	6.866	12.1416	8.16543	9.27978	8.27645	8.03368	P53762	Arnt	3	4	682.083	1465.42	1.1033	2.00164	2.05822
Q9R0Q6	Arpc1a	Actin-related protein 2/3 complex subunit 1A	ARC1A_MOUSE	41626.3	17	16	17	16	15	17	15	19636942	22870870	20600324	16857738	13715445	12524639	17966236	Q9R0Q6	Arpc1a	41626.3		41626.3	Arpc1a	24975.2	31235.9	30617.1	22577.2	13145	12491.4	15917.8	Arpc1a	183.078	186.338	181.843	173.978	176.238	157.975	182.771	Q9R0Q6	Arpc1a	3	4	13851.4	27351.4	0.981578	2.7452	2.63199
Q9WV32	Arpc1b	Actin-related protein 2/3 complex subunit 1B	ARC1B_MOUSE	41063.9	25	26	24	24	30	30	31	455966944	545411584	529591296	465502944	485501280	451721792	591009216	Q9WV32	Arpc1b	41063.9		41063.9	Arpc1b	587862	755099	797883	631977	471682	456695	530796	Arpc1b	4309.26	4504.55	4738.84	4869.97	6323.96	5775.67	6094.7	Q9WV32	Arpc1b	3	4	486391	693205	0.511165	1.86495	1.94464
Q9CVB6	Arpc2	Actin-related protein 2/3 complex subunit 2	ARPC2_MOUSE	34357.1	25	24	25	23	32	33	33	546470720	602099584	548728960	479896416	488375680	528921632	570849280	Q9CVB6	Arpc2	34357.1		34357.1	Arpc2	842079	996303	988098	778699	567096	639132	612772	Arpc2	6172.77	5943.46	5868.58	6000.6	7603.2	8082.88	7035.96	Q9CVB6	Arpc2	3	4	606333	901295	0.571888	2.40431	2.37869
Q9JM76	Arpc3	Actin-related protein 2/3 complex subunit 3	ARPC3_MOUSE	20524.7	9	8	12	9	17	16	17	252194032	254188720	256258464	219027984	274219328	303275808	377175712	Q9JM76	Arpc3	20524.7		20524.7	Arpc3	650520	704076	772432	594924	533017	613446	677737	Arpc3	4768.57	4200.17	4587.68	4584.45	7146.29	7758.05	7781.9	Q9JM76	Arpc3	3	4	608067	680488	0.16234	0.591015	0.821612
P59999	Arpc4	Actin-related protein 2/3 complex subunit 4	ARPC4_MOUSE	19667	11	10	10	10	12	12	14	312090560	394169920	368544224	271490688	292948992	365327584	463490400	P59999	Arpc4	19667		19667	Arpc4	840126	1.13942e+06	1.15934e+06	769582	594255	771186	869153	Arpc4	6158.46	6797.24	6885.61	5930.35	7967.32	9752.93	9979.77	P59999	Arpc4	3	4	744865	977117	0.391553	0.835361	1.04135
Q9CPW4	Arpc5	Actin-related protein 2/3 complex subunit 5	ARPC5_MOUSE	16288.4	12	12	13	13	15	14	15	141977888	172810144	147727888	128439640	121025440	128580704	125364904	Q9CPW4	Arpc5	16288.4		16288.4	Arpc5	461472	603158	561104	439603	296427	327728	283852	Arpc5	3382.77	3598.15	3332.55	3387.55	3974.28	4144.67	3259.24	Q9CPW4	Arpc5	3	4	302669	516334	0.770563	2.54986	2.48758
Q9D898	Arpc5l	Actin-related protein 2/3 complex subunit 5-like protein	ARP5L_MOUSE	16980.3	12	12	12	12	11	11	10	103168448	131537992	109951568	84287112	84172200	116362336	140834928	Q9D898	Arpc5l	16980.3		16980.3	Arpc5l	321665	440398	400603	276729	197762	284500	305886	Arpc5l	2357.93	2627.2	2379.29	2132.45	2651.44	3597.98	3512.23	Q9D898	Arpc5l	3	4	262716	359849	0.453888	0.923929	1.12067
P56212	Arpp19	cAMP-regulated phosphoprotein 19	ARP19_MOUSE	12292.9	11	12	11	11	10	10	10	37542416	46554460	36685688	26070922	11993721	10546001	12092159	P56212	Arpp19	12292.9		12292.9	Arpp19	161685	215300	184629	118233	38924	35616.2	36277.9	Arpp19	1185.21	1284.38	1096.56	911.096	521.863	450.426	416.549	P56212	Arpp19	3	4	36939.3	169962	2.20198	3.73865	3.25321	up
Q8BWG8	Arrb1	Beta-arrestin-1	ARRB1_MOUSE	46972.6	13	12	13	10	15	14	14	4438441	5998022	4428357	3.10122e+06	8880669	7.93557e+06	11002704	Q8BWG8	Arrb1	46972.6		46972.6	Arrb1	5002.52	7259.44	5832.53	3680.67	7542.59	7013.73	8638.71	Arrb1	36.6704	43.3063	34.6409	28.363	101.125	88.7003	99.1913	Q8BWG8	Arrb1	3	4	7731.68	5443.79	-0.50617	1.06692	1.24691
Q8BWG8-2	Arrb1	Isoform 1B of Beta-arrestin-1	ARRB1_MOUSE	46215.7	2	2	2	2	2	2	2	328551	354015	268323	453298	452024	412845	590484	Q8BWG8	Arrb1	46215.7		46215.7	Arrb1	376.371	435.483	359.192	546.805	390.204	370.862	471.208	Arrb1	2.75895	2.59788	2.13334	4.21365	5.23156	4.69017	5.4105	Q8BWG8	Arrb1	3	4	410.758	429.463	0.0642451	0.10354	0.385376
Q91YI4;Q91YI4-2	Arrb2	Beta-arrestin-2;Isoform 2 of Beta-arrestin-2	ARRB2_MOUSE	46313.98;46313.98-2	10	13	11	11	13	12	14	3.45435e+06	5757447	3.8793e+06	3.30314e+06	4.03612e+06	3.71197e+06	6036870	Q91YI4	Arrb2	46314		46314	Arrb2	3948.72	7067.36	5182.03	3976.07	3476.73	3327.42	4807.21	Arrb2	28.9457	42.1604	30.7775	30.6393	46.6134	42.0808	55.1973	Q91YI4	Arrb2	3	4	3870.45	5043.54	0.381935	0.609033	0.837019
Q99KN1	Arrdc1	Arrestin domain-containing protein 1	ARRD1_MOUSE	46329.8	10	9	10	10	7	9	7	3.66109e+06	4.17117e+06	4270156	3.43124e+06	1.2264e+06	1.19796e+06	1269765	Q99KN1	Arrdc1	46329.8		46329.8	Arrdc1	4183.62	5118.43	5702.19	4128.85	1056.07	1073.49	1010.78	Arrdc1	30.6676	30.5341	33.8668	31.8167	14.1589	13.5761	11.606	Q99KN1	Arrdc1	3	4	1046.78	4783.27	2.19204	4.75664	3.53719
P50429	Arsb	Arylsulfatase B	ARSB_MOUSE	59647.1	0	0	3	2	1	1	1	NaN	NaN	634264	134714	109739	142697	128677	P50429	Arsb	59647.1		59647.1	Arsb			657.869	125.911	73.3991	99.3211	79.5621	Arsb			3.90726	0.970259	0.984079	1.25608	0.913547	P50429	Arsb	3	2	84.0941	391.89	2.22037	0.845456	1.0507
Q9D0U9	Arv1	Protein ARV1	ARV1_MOUSE	30534.8	1	1	1	1	1	1	1	119010	155961	132110	108595	52512.6	54022	60514.6	Q9D0U9	Arv1	30534.8		30534.8	Arv1	206.343	290.375	267.671	198.268	68.61	73.4499	73.0902	Arv1	1.51258	1.73224	1.58977	1.52784	0.919871	0.928896	0.839235	Q9D0U9	Arv1	3	4	71.7167	240.664	1.74664	3.88377	3.32517
P98203;P98203-2;P98203-4;P98203-5	Arvcf	Splicing regulator ARVCF;Isoform 2 of Splicing regulator ARVCF;Isoform 4 of Splicing regulator ARVCF;Isoform 5 of Splicing regulator ARVCF	ARVC_MOUSE	105065.79;105065.79-2;105065.79-4;105065.79-5	1	1	1	1	1	1	1	6572108	9777481	4283158	3.74698e+06	5782205	3.14446e+06	140735680	P98203	Arvcf	105066		105066	Arvcf	3311.66	5290.6	2522.09	1988.19	2195.59	1242.51	49401.1	Arvcf	24.2758	31.5612	14.9794	15.3209	29.4368	15.7136	567.233	P98203	Arvcf	3	4	17613.1	3278.14	-2.4257	0.204457	0.47399
Q91WU5	As3mt	Arsenite methyltransferase	AS3MT_MOUSE	41793.6	13	16	16	15	20	21	20	10303917	15554589	15627721	13673787	13134359	13880991	15674368	Q91WU5	As3mt	41793.6		41793.6	As3mt	13052.5	21158.7	23133.7	18239.7	12537.7	13788.8	13831.7	As3mt	95.6803	126.222	137.397	140.554	168.096	174.382	158.818	Q91WU5	As3mt	3	4	13386	18896.1	0.497361	1.06762	1.24753
Q9WV54	Asah1	Acid ceramidase	ASAH1_MOUSE	44669.6	7	9	7	8	10	9	10	3.23711e+06	4487020	2936073	3.32133e+06	2.39675e+06	2.09525e+06	3.36627e+06	Q9WV54	Asah1	44669.6		44669.6	Asah1	3836.61	5710.65	4066.43	4145.14	2140.58	1947.33	2779.27	Asah1	28.1239	34.067	24.1516	31.9421	28.6992	24.6272	31.9121	Q9WV54	Asah1	3	4	2289.06	4439.71	0.955711	2.30195	2.29653
Q9QWY8;Q9QWY8-3;Q9QWY8-4	Asap1	Arf-GAP with SH3 domain, ANK repeat and PH domain-containing protein 1;Isoform 3 of Arf-GAP with SH3 domain, ANK repeat and PH domain-containing protein 1;Isoform 4 of Arf-GAP with SH3 domain, ANK repeat and PH domain-containing protein 1	ASAP1_MOUSE	127421.22;127421.22-3;127421.22-4	24	25	25	24	30	29	31	6.35036e+06	7.16883e+06	8584830	6698220	7456527	8427061	11344202	Q9QWY8	Asap1	127421		127421	Asap1	2638.51	3198.5	4168.2	2930.6	2334.61	2745.68	3283.42	Asap1	19.3413	19.0807	24.756	22.583	31.3007	34.7237	37.7008	Q9QWY8	Asap1	3	4	2787.9	3233.95	0.214119	0.444497	0.689554
Q7SIG6	Asap2	Arf-GAP with SH3 domain, ANK repeat and PH domain-containing protein 2	ASAP2_MOUSE	106805	1	1	1	1	1	1	1	293068864	487309600	234750704	182126992	168568288	114506424	440355200	Q7SIG6	Asap2	106805		106805	Asap2	145272	259390	135980	95065.3	62965.7	44509.6	152057	Asap2	1064.9	1547.4	807.62	732.567	844.197	562.899	1745.94	Q7SIG6	Asap2	3	4	86510.7	158927	0.877411	0.842629	1.04803
Q8VBX0	Asb13	Ankyrin repeat and SOCS box protein 13	ASB13_MOUSE	29896.2	2	1	1	1	0	1	2	283150	217789	203927	171139	NaN	96784.3	443443	Q8VBX0	Asb13	29896.2		29896.2	Asb13	501.421	414.152	422.005	319.134		134.402	547.036	Asb13	3.67562	2.47063	2.5064	2.45922		1.69973	6.28117	Q8VBX0	Asb13	2	4	340.719	414.178	0.281669	0.382288	0.633091
Q9WV72	Asb3	Ankyrin repeat and SOCS box protein 3	ASB3_MOUSE	58282.7	6	6	6	5	6	5	6	1.69672e+06	1.636e+06	1.95672e+06	1.11721e+06	652321	832698	1.05593e+06	Q9WV72	Asb3	58282.7		58282.7	Asb3	1541.25	1595.82	2077.05	1068.65	446.52	593.148	668.171	Asb3	11.298	9.51987	12.3362	8.23494	5.9866	7.50135	7.67207	Q9WV72	Asb3	3	4	569.28	1570.69	1.46419	2.4846	2.44005
Q91ZU1	Asb6	Ankyrin repeat and SOCS box protein 6	ASB6_MOUSE	46276.1	8	11	9	10	5	6	6	1.93041e+06	4507818	3.90867e+06	3.19799e+06	1.45304e+06	1.59329e+06	1.71664e+06	Q91ZU1	Asb6	46276.1		46276.1	Asb6	2208.49	5537.95	5225.54	3852.64	1252.68	1429.4	1368.1	Asb6	16.1891	33.0367	31.0359	29.6882	16.795	18.0771	15.7088	Q91ZU1	Asb6	3	4	1350.06	4206.16	1.63948	2.11012	2.14505
Q9D8Z1	Ascc1	Activating signal cointegrator 1 complex subunit 1	ASCC1_MOUSE	41279.8	8	9	10	10	9	9	9	3.37208e+06	4577660	4.28399e+06	3.63353e+06	1.35424e+06	1.43784e+06	1.8038e+06	Q9D8Z1	Ascc1	41279.8		41279.8	Ascc1	4324.76	6304.42	6420.49	4907.16	1308.81	1446.06	1611.55	Ascc1	31.7022	37.6091	38.133	37.8142	17.5476	18.2878	18.5041	Q9D8Z1	Ascc1	3	4	1455.48	5489.21	1.91511	3.87561	3.32218
Q91WR3;Q91WR3-3	Ascc2	Activating signal cointegrator 1 complex subunit 2;Isoform 3 of Activating signal cointegrator 1 complex subunit 2	ASCC2_MOUSE	85652.63;85652.63-3	22	20	22	20	14	16	12	9735449	12922057	8996978	8.38426e+06	2.34808e+06	2.93417e+06	2.46406e+06	Q91WR3	Ascc2	85652.6		85652.6	Ascc2	6017.52	8576.9	6498.52	5457.1	1093.68	1422.2	1060.97	Ascc2	44.1108	51.1656	38.5964	42.0521	14.6633	17.986	12.1823	Q91WR3	Ascc2	3	4	1192.28	6637.51	2.47691	4.20596	3.45097	up
E9PZJ8	Ascc3	Activating signal cointegrator 1 complex subunit 3	ASCC3_MOUSE	250557	68	69	63	62	40	45	38	25830964	39377564	27586998	22580464	5.6361e+06	6.64777e+06	6998083	E9PZJ8	Ascc3	250557		250557	Ascc3	5458.04	8934.74	6811.71	5024.18	897.411	1101.5	1030.07	Ascc3	40.0096	53.3003	40.4566	38.716	12.0318	13.9303	11.8274	E9PZJ8	Ascc3	3	4	1009.66	6557.17	2.6992	4.06264	3.39531	up
Q9CQE6	Asf1a	Histone chaperone ASF1A	ASF1A_MOUSE	22942.6	5	5	5	5	4	4	4	5557249	7.19135e+06	5584157	4561036	2.41101e+06	2.03826e+06	2.27198e+06	Q9CQE6	Asf1a	22942.6		22942.6	Asf1a	12823.9	17820	15058.2	11083	4192.52	3688.35	3652.21	Asf1a	94.0041	106.305	89.4347	85.4052	56.2102	46.6453	41.9354	Q9CQE6	Asf1a	3	4	3844.36	14196.3	1.8847	3.80856	3.28608
Q9DAP7	Asf1b	Histone chaperone ASF1B	ASF1B_MOUSE	22464.3	5	5	6	4	3	4	4	3.65455e+06	4.26053e+06	6344826	3.0566e+06	917048	1.47356e+06	1.46848e+06	Q9DAP7	Asf1b	22464.3		22464.3	Asf1b	8612.78	10782.3	17473.7	7585.51	1628.62	2723.27	2410.84	Asf1b	63.1351	64.3218	103.781	58.4535	21.8353	34.4403	27.6818	Q9DAP7	Asf1b	3	4	2254.24	11113.6	2.30161	2.79148	2.6671	up
Q91X20	Ash2l	Set1/Ash2 histone methyltransferase complex subunit ASH2	ASH2L_MOUSE	68250.1	20	22	22	22	21	22	21	17193508	20716860	20691024	17691962	15187038	18941714	18343194	Q91X20	Ash2l	68250.1		68250.1	Ash2l	13337.2	17256.8	18755.9	14451.4	8877.46	11522.1	9912.09	Ash2l	97.7667	102.946	111.396	111.362	119.022	145.716	113.812	Q91X20	Ash2l	3	4	10103.9	15950.3	0.658675	2.00079	2.058
Q91YI0	Asl	Argininosuccinate lyase	ARLY_MOUSE	51739.2	17	18	20	18	23	22	23	13213659	16163142	16539244	11790873	12931565	12075744	14024066	Q91YI0	Asl	51739.2		51739.2	Asl	13520.9	17760.1	19776.7	12704.7	9971.27	9689.68	9996.5	Asl	99.1136	105.948	117.459	97.9017	133.687	122.542	114.782	Q91YI0	Asl	3	4	9885.82	15940.6	0.689275	1.83408	1.91783
Q61024	Asns	Asparagine synthetase [glutamine-hydrolyzing]	ASNS_MOUSE	64282.7	17	15	18	14	0	0	0	6599222	6969037	7.44763e+06	4.39399e+06	NaN	NaN	NaN	Q61024	Asns	64282.7		64282.7	Asns	5435.02	6163.37	7167.74	3810.69				Asns	39.8408	36.7676	42.5711	29.3649				Q61024	Asns		4		5644.2				up-a
Q8BSY0	Asph	Aspartyl/asparaginyl beta-hydroxylase	ASPH_MOUSE	83042.1	8	1	0	0	0	1	0	1.5874e+06	57468.2	NaN	NaN	NaN	30461.6	NaN	Q8BSY0	Asph	83042.1		83042.1	Asph	1012.03	39.3431				15.2289		Asph	7.41854	0.234702				0.192595		Q8BSY0	Asph	1	2	15.2289	525.684	5.10931	0.277124	0.538148
Q8VBT9	Aspscr1	Tether containing UBX domain for GLUT4	ASPC1_MOUSE	59795.7	25	25	24	23	23	23	23	19555778	22960886	19753298	16424511	13027123	13465658	17773698	Q8VBT9	Aspscr1	59795.7		59795.7	Aspscr1	17314.4	21830.2	20437.5	15313	8691.56	9349.17	10962.3	Aspscr1	126.921	130.228	121.384	118.001	116.53	118.236	125.871	Q8VBT9	Aspscr1	3	4	9667.67	18723.8	0.953632	2.70498	2.60343
Q8C0M9	Asrgl1	Isoaspartyl peptidase/L-asparaginase	ASGL1_MOUSE	33949.9	9	11	11	10	11	11	11	8797100	9507217	9473193	7655761	10179987	12718288	16500709	Q8C0M9	Asrgl1	33949.9		33949.9	Asrgl1	13718.4	15920.4	17263	12571.5	11962.7	15552.7	17924.9	Asrgl1	100.561	94.9734	102.529	96.8753	160.386	196.689	205.817	Q8C0M9	Asrgl1	3	4	15146.7	14868.3	-0.0267664	0.03274	0.32416
P16460	Ass1	Argininosuccinate synthase	ASSY_MOUSE	46584.5	21	19	21	20	22	23	22	27874254	37685576	35088220	24911456	18825260	17804258	21047266	P16460	Ass1	46584.5		46584.5	Ass1	31678.5	45991.1	46599.2	29812.4	16122	15867.1	16662.8	Ass1	232.216	274.36	276.765	229.732	216.152	200.666	191.326	P16460	Ass1	3	4	16217.3	38520.3	1.24808	2.72608	2.61904
Q8BIR2	Aste1	Protein asteroid homolog 1	ASTE1_MOUSE	76370.3	0	1	0	1	0	0	0	NaN	22463.8	NaN	19478.6	NaN	NaN	NaN	Q8BIR2	Aste1	76370.3		76370.3	Aste1		16.7224		14.2191				Aste1		0.0997574		0.109571				Q8BIR2	Aste1		2		15.4707
P59598	Asxl1	Polycomb group protein ASXL1	ASXL1_MOUSE	162674	0	1	1	0	0	0	0	NaN	32328.1	39700.5	NaN	NaN	NaN	NaN	P59598	Asxl1	162674		162674	Asxl1		11.298	15.0985					Asxl1		0.0673981	0.0896743					P59598	Asxl1		2		13.1983
Q8BZ32	Asxl2	Putative Polycomb group protein ASXL2	ASXL2_MOUSE	147107	5	5	3	5	4	5	4	750298	690332	486496	804980	284223	560011	387339	Q8BZ32	Asxl2	147107		147107	Asxl2	270.024	266.787	204.599	305.064	77.0806	158.044	97.1073	Asxl2	1.97939	1.59152	1.21517	2.3508	1.03344	1.99873	1.115	Q8BZ32	Asxl2	3	4	110.744	261.619	1.24024	2.15681	2.18102
Q9D5T0	Atad1	Outer mitochondrial transmembrane helix translocase	ATAD1_MOUSE	40744	18	18	18	19	20	19	19	28990038	37515992	30783554	24533816	7.66898e+06	7197985	9787149	Q9D5T0	Atad1	40744		40744	Atad1	37669.3	52347	46742.6	33569.1	7509.19	7334.36	8859.02	Atad1	276.131	312.277	277.617	258.681	100.678	92.7552	101.721	Q9D5T0	Atad1	3	4	7900.86	42582	2.43016	4.3094	3.4798	up
Q8CDM1	Atad2	ATPase family AAA domain-containing protein 2	ATAD2_MOUSE	117943	32	36	35	30	25	28	24	16585765	20250874	18791746	13940395	5465192	6204036	8488989	Q8CDM1	Atad2	117943		117943	Atad2	7445	9761.35	9857.17	6589.31	1848.64	2183.82	2654.46	Atad2	54.5748	58.2315	58.5444	50.7768	24.7851	27.618	30.479	Q8CDM1	Atad2	3	4	2228.97	8413.21	1.91628	3.54348	3.14704
A0A1W2P7J4	Atad2b	A0A1W2P7ATPase family, AAA domain containing 2B (Fragment)	A0A1W2P7	28785	1	1	1	1	1	1	1	188624	292788	206249	203111	78829.4	101567	81716.4	A0A1W2P7J4	Atad2b	28785		28785	Atad2b	346.923	578.264	443.286	393.375	109.255	146.488	104.698	Atad2b	2.54308	3.44964	2.63279	3.03132	1.46481	1.85259	1.20216	A0A1W2P7J4	Atad2b	3	4	120.147	440.462	1.87422	3.37424	3.0481
E9Q166	Atad2b	E9ATPase family, AAA domain containing 2B	E9Q166_MOU	164724	40	42	44	41	42	47	44	22159798	22740204	21128440	18211336	16643378	18867740	22653392	E9Q166	Atad2b	164724		164724	Atad2b	7122.16	7848.34	7935.41	6163.45	4030.92	4755.31	5071.9	Atad2b	52.2083	46.8194	47.1305	47.4952	54.0436	60.1388	58.2365	E9Q166	Atad2b	3	4	4619.38	7267.34	0.653729	2.40126	2.3762
Q925I1	Atad3	ATPase family AAA domain-containing protein 3	ATAD3_MOUSE	66742	35	37	34	34	38	35	39	63330864	93946088	72551144	55491912	29265992	28419924	36273488	Q925I1	Atad3	66742		66742	Atad3	50236.4	80023.8	67251.7	46352.1	17493.8	17678.2	20044	Atad3	368.253	477.383	399.426	357.186	234.543	223.571	230.149	Q925I1	Atad3	3	4	18405.3	60966	1.72788	3.20156	2.9442
Q4QY64	Atad5	ATPase family AAA domain-containing protein 5	ATAD5_MOUSE	203909	10	18	18	13	0	0	0	1.17503e+06	3.51912e+06	3.70971e+06	1.65229e+06	NaN	NaN	NaN	Q4QY64	Atad5	203909		203909	Atad5	305.08	981.156	1125.54	451.74				Atad5	2.23636	5.8531	6.6849	3.48107				Q4QY64	Atad5		4		715.88				up-a
Q9Z2A5-2	Ate1	Isoform ATE1-2 of Arginyl-tRNA--protein transferase 1	ATE1_MOUSE	59048.1	1	1	1	1	2	2	2	312558	425185	357029	369182	369751	284398	401682	Q9Z2A5	Ate1	59048.1		59048.1	Ate1	280.238	409.366	374.073	348.557	249.818	199.957	250.882	Ate1	2.05426	2.44208	2.22172	2.68595	3.34937	2.52879	2.88068	Q9Z2A5	Ate1	3	4	233.552	353.058	0.59616	1.79849	1.88874
Q9Z2A5-3	Ate1	Isoform ATE1-3 of Arginyl-tRNA--protein transferase 1	ATE1_MOUSE	58319.5	16	14	18	17	19	19	19	7431284	9202426	9878583	11994217	6610433	6.69502e+06	9194753	Q9Z2A5	Ate1	58319.5		58319.5	Ate1	6746.09	8970.73	10479.5	11465.6	4522.05	4765.99	5814.6	Ate1	49.4515	53.515	62.2403	88.3531	60.6282	60.2739	66.7643	Q9Z2A5	Ate1	3	4	5034.21	9415.47	0.903267	2.002	2.05836
P81269	Atf1	Cyclic AMP-dependent transcription factor ATF-1	ATF1_MOUSE	29237.6	2	1	1	1	1	2	2	1087886	867311	989611	810439	622326	906957	1.12945e+06	P81269	Atf1	29237.6		29237.6	Atf1	1969.9	1686.45	2094.02	1545.32	849.171	1287.83	1424.69	Atf1	14.4401	10.0605	12.4369	11.9081	11.385	16.2868	16.3586	P81269	Atf1	3	4	1187.23	1823.92	0.619441	1.44919	1.58878
P16951;P16951-2	Atf2	Cyclic AMP-dependent transcription factor ATF-2;Isoform 2 of Cyclic AMP-dependent transcription factor ATF-2	ATF2_MOUSE	52297.8;52297.8-2	6	6	10	8	8	8	6	1.00674e+06	1.33728e+06	1.85172e+06	1.41246e+06	1.00694e+06	989971	1363366	P16951	Atf2	52297.8		52297.8	Atf2	1019.14	1453.71	2190.54	1505.67	768.136	785.877	961.441	Atf2	7.47073	8.67211	13.0102	11.6026	10.2986	9.93872	11.0394	P16951	Atf2	3	4	838.485	1542.26	0.879194	1.50786	1.63998
Q60765	Atf3	Cyclic AMP-dependent transcription factor ATF-3	ATF3_MOUSE	20721.7	0	2	0	0	0	0	0	NaN	257797	NaN	NaN	NaN	NaN	NaN	Q60765	Atf3	20721.7		20721.7	Atf3		707.281						Atf3		4.21929						Q60765	Atf3		1		707.281
F6VAN0	Atf6	Cyclic AMP-dependent transcription factor ATF-6 alpha	ATF6A_MOUSE	72694.4	1	2	3	3	0	0	0	92925.7	206295	328273	221457	NaN	NaN	NaN	F6VAN0	Atf6	72694.4		72694.4	Atf6	67.6763	161.334	279.378	169.835				Atf6	0.496094	0.962443	1.6593	1.30874				F6VAN0	Atf6		4		169.556				up-a
O35451	Atf6b	Cyclic AMP-dependent transcription factor ATF-6 beta	ATF6B_MOUSE	76007.4	8	7	6	6	3	2	3	1.88781e+06	1.58085e+06	1.83971e+06	1191970	216177	118545	504307	O35451	Atf6b	76007.4		76007.4	Atf6b	1314.94	1182.43	1497.45	874.274	113.468	64.7505	244.699	Atf6b	9.63902	7.05378	8.89374	6.7371	1.52129	0.818877	2.80968	O35451	Atf6b	3	4	140.972	1217.27	3.11017	2.90014	2.74233	up
Q8R0S1	Atf7	Cyclic AMP-dependent transcription factor ATF-7	ATF7_MOUSE	44607.9	6	4	4	3	5	5	4	1905772	1673302	1.52392e+06	1.22426e+06	1.00787e+06	804644	702875	Q8R0S1	Atf7	44607.9		44607.9	Atf7	2261.84	2132.56	2113.54	1530.03	901.386	748.871	581.112	Atf7	16.5802	12.7218	12.5529	11.7903	12.0851	9.47072	6.67244	Q8R0S1	Atf7	3	4	743.79	2009.49	1.43386	2.94758	2.7752
Q7TT18	Atf7ip	Activating transcription factor 7-interacting protein 1	MCAF1_MOUSE	138593	21	19	19	17	20	19	18	12356336	13343934	12775457	9723324	8.04879e+06	7.79565e+06	9521645	Q7TT18	Atf7ip	138593		138593	Atf7ip	4720.1	5473.72	5702.88	3911.22	2316.91	2335.21	2533.76	Atf7ip	34.6002	32.6536	33.8709	30.1396	31.0634	29.5327	29.0931	Q7TT18	Atf7ip	3	4	2395.29	4951.98	1.0478	3.00933	2.81957
Q9D8Z6	Atg101	Autophagy-related protein 101	ATGA1_MOUSE	25001.7	0	1	2	0	0	2	2	NaN	37290.4	126117	NaN	NaN	194342	291240	Q9D8Z6	Atg101	25001.7		25001.7	Atg101		84.7945	312.079			322.71	429.611	Atg101		0.505843	1.85352			4.0812	4.93287	Q9D8Z6	Atg101	2	2	376.16	198.436	-0.92267	0.468143	0.710539
Q9CQY1	Atg12	Ubiquitin-like protein ATG12	ATG12_MOUSE	15207.4	2	2	3	1	3	3	3	979398	1164405	1197600	179291	690897	780411	341614	Q9CQY1	Atg12	15207.4		15207.4	Atg12	3409.63	4353.01	4872.1	657.269	1812.5	2130.52	828.467	Atg12	24.994	25.9679	28.9367	5.06487	24.3007	26.9439	9.51262	Q9CQY1	Atg12	3	4	1590.49	3323	1.06301	0.416464	0.663829
Q91YI1;Q91YI1-2	Atg13	Autophagy-related protein 13;Isoform 2 of Autophagy-related protein 13	ATG13_MOUSE	56440.73;56440.73-2	3	2	4	4	3	5	4	260111	170985	521651	408487	260913	386570	477141	Q91YI1	Atg13	56440.7		56440.7	Atg13	243.988	172.229	571.802	403.482	184.426	284.348	311.779	Atg13	1.78853	1.02743	3.39608	3.10921	2.47264	3.59605	3.57991	Q91YI1	Atg13	3	4	260.184	347.875	0.419035	0.249908	0.514525
Q8C0J2;Q8C0J2-2;Q8C0J2-3;Q8C0J2-5	Atg16l1	A16Autophagy-related protein 16-1;A16Isoform 2 of Autophagy-related protein 16-1;A16Isoform 3 of Autophagy-related protein 16-1;A16Isoform 5 of Autophagy-related protein 16-1	A16L1_MO	68171.87;68171.87-2;68171.87-3;68171.87-5	14	13	15	14	12	13	12	3.61565e+06	4.25648e+06	4933026	3.52461e+06	2.40887e+06	2.31721e+06	2.78477e+06	Q8C0J2	Atg16l1	68171.9		68171.9	Atg16l1	2807.91	3549.64	4476.79	2882.33	1409.7	1411.16	1506.53	Atg16l1	20.5831	21.1754	26.5888	22.2111	18.9002	17.8465	17.2983	Q8C0J2	Atg16l1	3	4	1442.46	3429.17	1.24932	2.90435	2.74499
Q6KAU8;Q6KAU8-3	Atg16l2	A16Protein Atg16l2;A16Isoform 3 of Protein Atg16l2	A16L2_MO	69241.19;69241.19-3	5	5	4	4	4	5	5	643275	600316	463144	378351	517839	752815	1168357	Q6KAU8	Atg16l2	69241.2		69241.2	Atg16l2	491.852	492.896	413.819	304.628	298.366	451.376	622.307	Atg16l2	3.60547	2.94038	2.45778	2.34744	4.00027	5.7084	7.14545	Q6KAU8	Atg16l2	3	4	457.35	425.798	-0.103127	0.0726876	0.358444
Q6P4T0	Atg2a	Autophagy-related protein 2 homolog A	ATG2A_MOUSE	210939	21	22	18	17	19	19	18	6988102	6.66281e+06	5.20904e+06	4.69545e+06	4.10381e+06	3.60731e+06	5.83975e+06	Q6P4T0	Atg2a	210939		210939	Atg2a	1753.9	1795.72	1527.77	1240.96	776.154	709.972	1021.01	Atg2a	12.8567	10.7124	9.07383	9.56275	10.4061	8.97878	11.7234	Q6P4T0	Atg2a	3	4	835.712	1579.59	0.918469	2.27361	2.27434
Q80XK6	Atg2b	Autophagy-related protein 2 homolog B	ATG2B_MOUSE	231399	36	40	37	37	25	27	20	9262589	16078353	10623566	7148141	7727916	2.61635e+06	3.26546e+06	Q80XK6	Atg2b	231399		231399	Atg2b	2119.21	3950.2	2840.32	1722.15	1332.35	469.407	520.448	Atg2b	15.5346	23.565	16.8694	13.2707	17.8632	5.93643	5.97588	Q80XK6	Atg2b	3	4	774.07	2657.97	1.77979	1.86148	1.94176
Q9CPX6	Atg3	Ubiquitin-like-conjugating enzyme ATG3	ATG3_MOUSE	35796.3	10	11	10	9	11	11	10	18478344	21868620	20014490	16851808	9425024	11194844	17496178	Q9CPX6	Atg3	35796.3		35796.3	Atg3	27329.2	34731.4	34591.1	26245	10504.2	12983.6	18026	Atg3	200.334	207.191	205.446	202.242	140.833	164.199	206.978	Q9CPX6	Atg3	3	4	13837.9	30724.2	1.15075	2.43689	2.40272
Q8C9S8	Atg4a	Cysteine protease ATG4A	ATG4A_MOUSE	45094.8	0	0	1	0	1	1	1	NaN	NaN	49369.7	NaN	111517	49078	76814	Q8C9S8	Atg4a	45094.8		45094.8	Atg4a			67.7318		98.6582	45.1832	62.8215	Atg4a			0.402277		1.32273	0.571416	0.721328	Q8C9S8	Atg4a	3	1	68.8876	67.7318	-0.0244115	0.024137	0.316718
Q8BGE6	Atg4b	Cysteine protease ATG4B	ATG4B_MOUSE	44375.4	15	16	14	14	15	15	15	9738383	11269688	10842159	9024903	5650776	5.25165e+06	8219917	Q8BGE6	Atg4b	44375.4		44375.4	Atg4b	11618.4	14438.1	15115.8	11338.1	5080.25	4913.26	6831.55	Atg4b	85.1677	86.1306	89.777	87.3704	68.1122	62.1363	78.4411	Q8BGE6	Atg4b	3	4	5608.35	13127.6	1.22695	3.01124	2.82074
Q99J83	Atg5	Autophagy protein 5	ATG5_MOUSE	32402.2	13	14	11	11	10	11	10	6.49021e+06	7.53188e+06	5.71722e+06	5165221	3.79188e+06	4.06059e+06	5723005	Q99J83	Atg5	32402.2		32402.2	Atg5	10604.4	13215	10916.1	8886.96	4668.75	5202.72	6513.94	Atg5	77.7346	78.8345	64.8339	68.4824	62.595	65.7971	74.7943	Q99J83	Atg5	3	4	5461.8	10905.6	0.997625	2.55592	2.49267
Q9D906	Atg7	Ubiquitin-like modifier-activating enzyme ATG7	ATG7_MOUSE	77520.2	26	27	25	23	27	28	27	9498700	11981721	10449134	8.21405e+06	8030785	7.54817e+06	10073014	Q9D906	Atg7	77520.2		77520.2	Atg7	6487.12	8787.07	8339.19	5907.19	4132.97	4042.43	4792.24	Atg7	47.5531	52.4194	49.5287	45.5204	55.4118	51.1232	55.0254	Q9D906	Atg7	3	4	4322.55	7380.14	0.771767	2.10855	2.14448
Q9CWJ9	Atic	Bifunctional purine biosynthesis protein ATIC	PUR9_MOUSE	64217.4	35	42	41	40	45	44	45	517361632	572924416	607240256	477487808	296856928	271671424	344594720	Q9CWJ9	Atic	64217.4		64217.4	Atic	426524	507206	585014	414523	184422	175633	197902	Atic	3126.59	3025.74	3474.55	3194.28	2472.6	2221.17	2272.35	Q9CWJ9	Atic	3	4	185986	483317	1.37778	3.66356	3.21536
Q6PA06	Atl2	Atlastin-2	ATLA2_MOUSE	66224.1	12	14	13	14	12	12	14	9369208	13960854	9716097	8865442	3.25888e+06	2217897	4055829	Q6PA06	Atl2	66224.1		66224.1	Atl2	7490.12	11984.9	9076.82	7463.16	1963.23	1390.4	2258.69	Atl2	54.9056	71.4962	53.9097	57.5106	26.3215	17.5839	25.9347	Q6PA06	Atl2	3	4	1870.78	9003.76	2.26689	3.49992	3.12272	up
Q91YH5	Atl3	Atlastin-3	ATLA3_MOUSE	60575.1	22	27	23	23	25	28	27	34417408	43434928	38702272	29291798	19932462	21535950	30037628	Q91YH5	Atl3	60575.1		60575.1	Atl3	30080.6	40764.7	39527.6	26958.2	13127.6	14760	18288	Atl3	220.503	243.182	234.765	207.738	176.005	186.664	209.986	Q91YH5	Atl3	3	4	15391.8	34332.8	1.15742	2.56021	2.49601
Q62388	Atm	Serine-protein kinase ATM	ATM_MOUSE	349418	81	88	89	82	81	80	83	30278138	45739368	66540688	33523540	17178704	18433100	25811618	Q62388	Atm	349418		349418	Atm	4587.6	7441.9	11781.5	5348.63	1961.39	2190.12	2724.35	Atm	33.6289	44.3947	69.9733	41.2162	26.2968	27.6977	31.2815	Q62388	Atm	3	4	2291.95	7289.9	1.66932	2.08276	2.12351
O08997	Atox1	Copper transport protein ATOX1	ATOX1_MOUSE	7338.42	3	4	4	4	5	5	5	2.89762e+06	4.45187e+06	5.22755e+06	5087260	12306962	10237938	13190815	O08997	Atox1	7338.42		7338.42	Atox1	20904.5	34488.9	44071.1	38647.4	66906.4	57919.5	66292.2	Atox1	153.239	205.744	261.75	297.814	897.03	732.489	761.18	O08997	Atox1	3	4	63706.1	34528	-0.883665	1.66243	1.77249
Q6DFW5	Atp11b	Phospholipid-transporting ATPase IF	AT11B_MOUSE	133536	12	17	15	15	15	15	13	2560051	4.11828e+06	3003713	3.16518e+06	2.03495e+06	1.90617e+06	2.36182e+06	Q6DFW5	Atp11b	133536		133536	Atp11b	1014.97	1753.3	1391.61	1321.41	607.958	592.623	652.292	Atp11b	7.44011	10.4593	8.26515	10.1827	8.15104	7.4947	7.48974	Q6DFW5	Atp11b	3	4	617.624	1370.32	1.14971	2.66001	2.57121
Q9QZW0-2	Atp11c	Isoform 2 of Phospholipid-transporting ATPase 11C	AT11C_MOUSE	127511	12	14	15	12	14	17	17	2.74293e+06	4329207	3482931	2.51125e+06	2447158	3471899	4319738	Q9QZW0	Atp11c	127511		127511	Atp11c	1138.85	1930.19	1689.88	1097.95	765.655	1130.41	1249.4	Atp11c	8.34826	11.5146	10.0366	8.4607	10.2653	14.2959	14.3459	Q9QZW0	Atp11c	3	4	1048.49	1464.22	0.481818	0.745504	0.960297
Q9Z1W8	Atp12a	Potassium-transporting ATPase alpha chain 2	AT12A_MOUSE	114727	0	0	0	1	1	0	0	NaN	NaN	NaN	15919.2	20269.4	NaN	NaN	Q9Z1W8	Atp12a	114727		114727	Atp12a				7.73563	7.0485			Atp12a				0.0596102	0.094501			Q9Z1W8	Atp12a	1	1	7.0485	7.73563	0.134202
Q9EPE9	Atp13a1	Endoplasmic reticulum transmembrane helix translocase	AT131_MOUSE	132388	38	39	38	38	45	46	43	40228104	46959872	42784272	35916408	23041688	22677228	28433206	Q9EPE9	Atp13a1	132388		132388	Atp13a1	16087.3	20165.9	19993.7	15124.5	6943.59	7111.42	7920.83	Atp13a1	117.926	120.3	118.748	116.549	93.0945	89.9357	90.9484	Q9EPE9	Atp13a1	3	4	7325.28	17842.9	1.28439	3.64149	3.20511
Q5XF89;Q5XF89-2	Atp13a3	Polyamine-transporting ATPase 13A3;Isoform 2 of Polyamine-transporting ATPase 13A3	AT133_MOUSE	137469.23;137469.23-2	2	3	5	2	0	1	1	448339	635686	845065	195471	NaN	148235	151186	Q5XF89	Atp13a3	137469		137469	Atp13a3	172.664	262.891	380.315	79.2711		44.7671	40.5601	Atp13a3	1.2657	1.56828	2.25879	0.610858		0.566155	0.465718	Q5XF89	Atp13a3	2	4	42.6636	223.785	2.39104	1.38977	1.53556
Q8VDN2	Atp1a1	AT1Sodium/potassium-transporting ATPase subunit alpha-1	AT1A1_MO	112982	50	48	53	51	54	56	52	253343200	268835424	263288016	207036032	94397040	106194616	118889816	Q8VDN2	Atp1a1	112982		112982	Atp1a1	118714	135275	144172	102159	33332.5	39021.9	38808.6	Atp1a1	870.22	806.982	856.273	787.227	446.897	493.496	445.608	Q8VDN2	Atp1a1	3	4	37054.3	125080	1.75513	4.16778	3.43895
Q9WV27	Atp1a4	AT1Sodium/potassium-transporting ATPase subunit alpha-4	AT1A4_MO	114887	0	0	0	0	1	1	1	NaN	NaN	NaN	NaN	295699	262177	256762	Q9WV27	Atp1a4	114887		114887	Atp1a4					102.683	94.7412	82.424	Atp1a4					1.3767	1.19816	0.946408	Q9WV27	Atp1a4	3		93.2827					down-a
P14094	Atp1b1	AT1Sodium/potassium-transporting ATPase subunit beta-1	AT1B1_MO	35194.6	7	7	7	7	6	6	5	6170729	3.83819e+06	3.70717e+06	4686278	2.38164e+06	3.52059e+06	3.6227e+06	P14094	Atp1b1	35194.6		35194.6	Atp1b1	9282.47	6199.98	6516.67	7423.2	2699.73	4152.94	3796.21	Atp1b1	68.0441	36.986	38.7042	57.2027	36.196	52.5208	43.5888	P14094	Atp1b1	3	4	3549.63	7355.58	1.05117	2.30647	2.2996
P97370	Atp1b3	AT1Sodium/potassium-transporting ATPase subunit beta-3	AT1B3_MO	31775.7	14	14	15	14	13	13	13	64314168	68612120	58499764	44627700	15634962	14940282	20993604	P97370	Atp1b3	31775.7		31775.7	Atp1b3	107155	122757	113898	78297.6	19630	19520	24366.1	Atp1b3	785.492	732.307	676.473	603.356	263.185	246.863	279.776	P97370	Atp1b3	3	4	21172	105527	2.31738	4.16873	3.43895	up
Q9CWQ3	Atp23	Mitochondrial inner membrane protease ATP23 homolog	ATP23_MOUSE	21709.6	0	0	1	1	0	1	0	NaN	NaN	220946	198396	NaN	125894	NaN	Q9CWQ3	Atp23	21709.6		21709.6	Atp23			629.64	509.472		240.751		Atp23			3.7396	3.92596		3.0447		Q9CWQ3	Atp23	1	2	240.751	569.556	1.2423	0.871462	1.07342
Q8R429	Atp2a1	AT2Sarcoplasmic/endoplasmic reticulum calcium ATPase 1	AT2A1_MO	109425	8	12	3	1	10	11	9	1.97453e+06	4.07014e+06	328213	191380	3087853	2.30867e+06	3.08216e+06	Q8R429	Atp2a1	109425		109425	Atp2a1	955.315	2114.61	185.565	97.5027	1125.79	875.91	1038.8	Atp2a1	7.00284	12.6147	1.10212	0.75135	15.0937	11.0773	11.9277	Q8R429	Atp2a1	3	4	1013.5	838.248	-0.273895	0.434052	0.679925
O55143	Atp2a2	AT2Sarcoplasmic/endoplasmic reticulum calcium ATPase 2	AT2A2_MO	114858	47	47	46	46	42	45	39	135129632	144604544	130464696	108026640	35458432	39657032	45369664	O55143	Atp2a2	114858		114858	Atp2a2	62286.1	71574.8	70273.2	52433.4	12316.2	14334.2	14567.9	Atp2a2	456.582	426.98	417.371	404.048	165.127	181.28	167.272	O55143	Atp2a2	3	4	13739.5	64141.9	2.22294	4.76344	3.53719	up
Q64518-1	Atp2a3	AT2Isoform SERCA3B of Sarcoplasmic/endoplasmic reticulum calcium ATPase 3	AT2A3_MO	113638	48	48	47	46	57	57	56	263186384	266761312	218920640	201615984	257986000	270015200	352394144	Q64518	Atp2a3	113638		113638	Atp2a3	122615	133456	119185	98909.9	90571.5	98646	114366	Atp2a3	898.813	796.134	707.871	762.193	1214.31	1247.54	1313.18	Q64518	Atp2a3	3	4	101195	118541	0.228257	0.808096	1.01679
G5E829	Atp2b1	AT2Plasma membrane calcium-transporting ATPase 1	AT2B1_MO	134747	25	25	27	25	27	27	26	13079755	14705667	14218091	12275065	7.25193e+06	7472497	9313187	G5E829	Atp2b1	134747		134747	Atp2b1	5139.06	6204.48	6528.01	5078.6	2147.11	2302.3	2549.02	Atp2b1	37.6713	37.0129	38.7716	39.1353	28.7868	29.1164	29.2683	G5E829	Atp2b1	3	4	2332.81	5737.54	1.29836	3.83458	3.3008
Q80XR2	Atp2c1	AT2Calcium-transporting ATPase type 2C member 1	AT2C1_MO	100299	13	12	19	14	18	17	16	2.8118e+06	3.34762e+06	4.8554e+06	2.87996e+06	3.14217e+06	2798195	3.45865e+06	Q80XR2	Atp2c1	100299		100299	Atp2c1	1484.19	1897.49	2994.93	1600.77	1249.83	1158.23	1271.76	Atp2c1	10.8797	11.3195	17.7877	12.3354	16.7568	14.6478	14.6025	Q80XR2	Atp2c1	3	4	1226.61	1994.34	0.70124	1.20085	1.36865
Q03265	Atp5f1a	ATP synthase subunit alpha, mitochondrial	ATPA_MOUSE	59752.6	39	35	38	40	48	47	48	1727500288	1915854720	1779499136	1457729152	1036816448	1143961728	1442604800	Q03265	Atp5f1a	59752.6		59752.6	Atp5f1a	1.53061e+06	1.82283e+06	1.84247e+06	1.36006e+06	692252	794822	890398	Atp5f1a	11220	10874.1	10942.9	10480.5	9281.19	10051.8	10223.7	Q03265	Atp5f1a	3	4	792491	1.63899e+06	1.04834	2.9919	2.807
P56480	Atp5f1b	ATP synthase subunit beta, mitochondrial	ATPB_MOUSE	56300.5	28	28	29	28	29	29	29	1879221632	2296587264	2011212928	1650129024	1201981056	1353969920	1918718720	P56480	Atp5f1b	56300.5		56300.5	Atp5f1b	1.76713e+06	2.31905e+06	2.21006e+06	1.63397e+06	851735	998417	1.25688e+06	Atp5f1b	12953.8	13834.3	13126.1	12591.3	11419.4	12626.6	14431.7	P56480	Atp5f1b	3	4	1.03568e+06	1.98255e+06	0.936786	2.28149	2.2803
Q91VR2	Atp5f1c	ATP synthase subunit gamma, mitochondrial	ATPG_MOUSE	32885.9	12	11	12	13	13	13	13	143553264	150335328	149731056	113819256	81443864	87626704	103743960	Q91VR2	Atp5f1c	32885.9		32885.9	Atp5f1c	231103	259891	281683	192950	98802.4	110622	116345	Atp5f1c	1694.08	1550.38	1672.99	1486.86	1324.67	1399	1335.89	Q91VR2	Atp5f1c	3	4	108590	241407	1.15258	3.18112	2.93277
Q9D3D9	Atp5f1d	ATP synthase subunit delta, mitochondrial	ATPD_MOUSE	17600	5	5	5	5	4	4	4	26929286	23228820	28985924	19335060	13914661	16962238	16768410	Q9D3D9	Atp5f1d	17600		17600	Atp5f1d	81005.4	75033.1	101890	61245	31541.2	40011.5	35137.6	Atp5f1d	593.801	447.611	605.153	471.95	422.881	506.012	403.457	Q9D3D9	Atp5f1d	3	4	35563.4	79793.4	1.16587	2.67115	2.57871
P56382	Atp5f1e	ATP synthase subunit epsilon, mitochondrial	ATP5E_MOUSE	5837.84	3	3	3	3	3	3	3	26395656	25188516	23056112	17299796	23149868	25763146	31400408	P56382	Atp5f1e	5837.84		5837.84	Atp5f1e	239377	245296	244339	165207	158203	183215	198370	Atp5f1e	1754.73	1463.31	1451.19	1273.07	2121.07	2317.06	2277.73	P56382	Atp5f1e	3	4	179930	223554	0.313193	0.790626	1.00055
O35143	Atp5if1	ATPase inhibitor, mitochondrial	ATIF1_MOUSE	12158.7	3	4	3	6	6	6	7	1.33843e+06	5.51755e+06	6467764	5002330	6.5559e+06	6688347	9312638	O35143	Atp5if1	12158.7		12158.7	Atp5if1	5827.89	25798.8	32909.8	22936.3	21511.2	22837.4	28247.5	Atp5if1	42.7208	153.903	195.46	176.746	288.406	288.817	324.343	O35143	Atp5if1	3	4	24198.7	21868.2	-0.146095	0.230333	0.497479
Q9CR84	Atp5mc1	AT5ATP synthase F(0) complex subunit C1, mitochondrial	AT5G1_MO	14199.7	1	0	0	0	0	0	0	41423.4	NaN	NaN	NaN	NaN	NaN	NaN	Q9CR84	Atp5mc1	14199.7		14199.7	Atp5mc1	154.443							Atp5mc1	1.13213							Q9CR84	Atp5mc1		1		154.443
Q06185	Atp5me	ATP synthase subunit e, mitochondrial	ATP5I_MOUSE	8235.6	5	6	6	6	7	7	7	61807592	64164856	55902368	47550608	31038820	38803448	40744828	Q06185	Atp5me	8235.6		8235.6	Atp5me	397328	442936	419946	321884	150359	195610	182461	Atp5me	2912.57	2642.34	2494.17	2480.42	2015.9	2473.81	2095.06	Q06185	Atp5me	3	4	176143	395523	1.16701	3.21381	2.95163
P56135	Atp5mf	ATP synthase subunit f, mitochondrial	ATPK_MOUSE	10344.2	5	5	5	5	5	5	5	79604072	96427768	87136792	71637432	68813400	74045896	118512896	P56135	Atp5mf	10344.2		10344.2	Atp5mf	407417	529960	521149	386083	265396	297179	422533	Atp5mf	2986.53	3161.49	3095.24	2975.13	3558.23	3758.32	4851.61	P56135	Atp5mf	3	4	328369	461152	0.489923	1.15549	1.3275
Q9CPQ8	Atp5mg	ATP synthase subunit g, mitochondrial	ATP5L_MOUSE	11424.5	6	6	7	6	7	7	7	60418208	63326420	61708128	54738856	41023064	50284464	68426384	Q9CPQ8	Atp5mg	11424.5		11424.5	Atp5mg	279984	315128	334167	267114	143255	182731	220892	Atp5mg	2052.39	1879.9	1984.71	2058.36	1920.66	2310.94	2536.32	Q9CPQ8	Atp5mg	3	4	182293	299098	0.714363	2.05979	2.10509
A0A1Y7VLP0;P56379	Atp5mj;Atp5mpl	A0A1Y7ATP synthase membrane subunit 6.8PL (Fragment);ATP synthase subunit ATP5MPL, mitochondrial	A0A1Y7VLP0;ATP68_MOUSE	6560.83;6697.97	1	1	1	1	1	1	1	9429922	13470976	12718417	8457176	11187453	8584149	6790926	A0A1Y7VLP0	Atp5mj	6560.83		6560.83	Atp5mj	76094.2	116729	119931	71863	68028.6	54319.2	38173.7	Atp5mj	557.801	696.35	712.304	553.771	912.076	686.957	438.317	A0A1Y7VLP0	Atp5mj	3	4	53507.2	96154.4	0.845621	1.38867	1.53516
Q78IK2	Atp5mk	ATP synthase membrane subunit K, mitochondrial	ATPMK_MOUSE	6381.52	4	4	3	3	4	4	4	36322468	38753720	33299504	25857422	18824472	20478952	20777398	Q78IK2	Atp5mk	6381.52		6381.52	Atp5mk	301338	345246	322829	225891	117684	133229	120077	Atp5mk	2208.92	2059.57	1917.37	1740.7	1577.82	1684.9	1378.75	Q78IK2	Atp5mk	3	4	123663	298826	1.27289	3.19634	2.94201
Q9CQQ7	Atp5pb	AT5ATP synthase F(0) complex subunit B1, mitochondrial	AT5F1_MO	28948.8	17	17	18	18	21	21	21	140625664	141456208	115481416	100973528	125727328	109419400	151598656	Q9CQQ7	Atp5pb	28948.8		28948.8	Atp5pb	257179	277799	246797	194453	173268	156920	193134	Atp5pb	1885.23	1657.21	1465.79	1498.44	2323.04	1984.52	2217.6	Q9CQQ7	Atp5pb	3	4	174441	244057	0.484483	1.61225	1.72941
Q9DCX2	Atp5pd	ATP synthase subunit d, mitochondrial	ATP5H_MOUSE	18749.5	16	16	16	16	17	18	18	209311664	248052224	205376848	178613472	152111552	140180960	164378784	Q9DCX2	Atp5pd	18749.5		18749.5	Atp5pd	591027	752132	677675	531085	323663	310396	323334	Atp5pd	4332.46	4486.85	4024.89	4092.51	4339.43	3925.47	3712.58	Q9DCX2	Atp5pd	3	4	319131	637980	0.999363	3.18035	2.93263
P97450	Atp5pf	ATP synthase-coupling factor 6, mitochondrial	ATP5J_MOUSE	12496.4	5	4	5	5	5	5	6	3.93619e+06	3.89748e+06	3.59346e+06	2.74206e+06	2.70172e+06	3.5124e+06	4172544	P97450	Atp5pf	12496.4		12496.4	Atp5pf	16676	17731.1	17790.4	12232.9	8625.3	11669	12314.3	Atp5pf	122.242	105.775	105.662	94.2658	115.642	147.574	141.395	P97450	Atp5pf	3	4	10869.5	16107.6	0.567454	1.42217	1.5647
Q9DB20	Atp5po	ATP synthase subunit O, mitochondrial	ATPO_MOUSE	23363.5	14	16	15	15	16	16	17	164843264	202024272	266025152	215724192	150111888	155983440	206514976	Q9DB20	Atp5po	23363.5		23363.5	Atp5po	373538	491591	704437	514753	256328	277176	325992	Atp5po	2738.18	2932.59	4183.84	3966.65	3436.65	3505.35	3743.1	Q9DB20	Atp5po	3	4	286498	521080	0.862978	1.76529	1.86024
Q9R1Q9	Atp6ap1	V-type proton ATPase subunit S1	VAS1_MOUSE	51007.6	10	10	10	10	9	9	9	8945042	10117828	8513291	7884986	4678941	4.81111e+06	5.44407e+06	Q9R1Q9	Atp6ap1	51007.6		51007.6	Atp6ap1	9284.32	11277	10325.7	8617.96	3659.59	3915.85	3936.25	Atp6ap1	68.0577	67.2729	61.3273	66.4095	49.065	49.5224	45.1968	Q9R1Q9	Atp6ap1	3	4	3837.23	9876.24	1.3639	4.31196	3.4798
Q9CYN9	Atp6ap2	Renin receptor	RENR_MOUSE	39092	12	12	13	11	12	13	12	7.06239e+06	7.70544e+06	7092951	5761347	4.35356e+06	4.33165e+06	5729976	Q9CYN9	Atp6ap2	39092		39092	Atp6ap2	9564.59	11206	11225.3	8216.28	4442.99	4600.24	5405.79	Atp6ap2	70.1122	66.8494	66.67	63.3141	59.5683	58.1777	62.0703	Q9CYN9	Atp6ap2	3	4	4816.34	10053	1.06162	3.09045	2.87592
Q9Z1G4;Q9Z1G4-2;Q9Z1G4-3	Atp6v0a1	V-type proton ATPase 116 kDa subunit a 1;Isoform A1-I of V-type proton ATPase 116 kDa subunit a 1;Isoform A1-III of V-type proton ATPase 116 kDa subunit a 1	VPP1_MOUSE	96466.89;96466.89-2;96466.89-3	18	16	18	17	16	17	17	11674062	13945591	12852405	10932228	7899943	9183811	10707006	Q9Z1G4	Atp6v0a1	96466.9		96466.9	Atp6v0a1	6406.87	8218.6	8242.6	6317.84	3267.12	3952.39	4093.39	Atp6v0a1	46.9649	49.0282	48.955	48.6849	43.803	49.9846	47.0011	Q9Z1G4	Atp6v0a1	3	4	3770.97	7296.48	0.952266	2.8006	2.67255
P15920	Atp6v0a2	V-type proton ATPase 116 kDa subunit a 2	VPP2_MOUSE	98145.3	21	15	15	17	17	15	16	33198042	5.85811e+06	5103770	5.41782e+06	4.89637e+06	4265411	5.23107e+06	P15920	Atp6v0a2	98145.3		98145.3	Atp6v0a2	17907.9	3393.34	3217.21	3077.47	1990.32	1804.29	1965.69	Atp6v0a2	131.272	20.243	19.1079	23.7148	26.6848	22.8183	22.5704	P15920	Atp6v0a2	3	4	1920.1	6898.99	1.8452	0.917409	1.11453
P63082	Atp6v0c	V-type proton ATPase 16 kDa proteolipid subunit c	VATL_MOUSE	15807.9	2	1	1	1	2	2	2	10316741	11962387	13550443	11212600	25229972	25765658	45918152	P63082	Atp6v0c	15807.9		15807.9	Atp6v0c	34551.8	43021.2	53031.9	39543	63673.8	67667.8	107128	Atp6v0c	253.278	256.644	314.971	304.716	853.691	855.771	1230.06	P63082	Atp6v0c	3	4	79489.9	42537	-0.902054	1.76642	1.86117
P51863	Atp6v0d1	VA0V-type proton ATPase subunit d 1	VA0D1_MO	40301.1	13	12	15	15	17	19	17	5.61686e+06	7313748	11913226	7133964	16595117	14416822	20442556	P51863	Atp6v0d1	40301.1		40301.1	Atp6v0d1	7378.69	10317.2	18288.2	9868.54	16427.9	14851.4	18707.3	Atp6v0d1	54.0887	61.5475	108.619	76.0463	220.253	187.821	214.801	P51863	Atp6v0d1	3	4	16662.2	11463.2	-0.539577	0.904081	1.10264
P50516	Atp6v1a	V-type proton ATPase catalytic subunit A	VATA_MOUSE	68326.1	37	38	39	36	43	43	42	64148324	78915720	78221832	64653588	57661708	60798092	76487000	P50516	Atp6v1a	68326.1		68326.1	Atp6v1a	49705.1	65662.4	70827.2	52752.7	33668.2	36941.9	41285.2	Atp6v1a	364.358	391.71	420.661	406.509	451.398	467.191	474.045	P50516	Atp6v1a	3	4	37298.4	59736.8	0.679505	2.04526	2.09303
P62814	Atp6v1b2	V-type proton ATPase subunit B, brain isoform	VATB2_MOUSE	56550.8	28	27	28	28	31	32	32	61478400	84716008	69215360	58236088	48184928	51130748	70045680	P62814	Atp6v1b2	56550.8		56550.8	Atp6v1b2	57555.4	85166	75722	57410.6	33993.2	37536.9	45681.1	Atp6v1b2	421.904	508.059	449.733	442.402	455.755	474.717	524.519	P62814	Atp6v1b2	3	4	39070.4	68963.5	0.819757	2.01022	2.06438
Q9Z1G3	Atp6v1c1	V-type proton ATPase subunit C 1	VATC1_MOUSE	43887.6	26	27	29	26	25	28	26	26445822	28884784	26935628	21305902	12886040	12059639	14854720	Q9Z1G3	Atp6v1c1	43887.6		43887.6	Atp6v1c1	31902	37416.8	37970.3	27064.3	11713.8	11408	12482.9	Atp6v1c1	233.854	223.211	225.516	208.556	157.05	144.273	143.331	Q9Z1G3	Atp6v1c1	3	4	11868.2	33588.4	1.50086	3.90552	3.33174
P57746	Atp6v1d	V-type proton ATPase subunit D	VATD_MOUSE	28369	8	10	11	10	8	10	8	6464942	7.16407e+06	7.50089e+06	6.47467e+06	5.46782e+06	5.79413e+06	6456223	P57746	Atp6v1d	28369		28369	Atp6v1d	12064.9	14356.7	16357.9	12723.6	7689.33	8479.28	8393.21	Atp6v1d	88.4403	85.6451	97.1538	98.0476	103.093	107.235	96.3724	P57746	Atp6v1d	3	4	8187.27	13875.8	0.761114	2.79372	2.66802
P50518	Atp6v1e1	V-type proton ATPase subunit E 1	VATE1_MOUSE	26157.4	13	12	12	13	14	14	15	25455896	35240484	31434602	27414876	21717518	26094372	31663726	P50518	Atp6v1e1	26157.4		26157.4	Atp6v1e1	51522.4	76592.6	74348.4	58429.2	33123.4	41415.9	44643.8	Atp6v1e1	377.68	456.914	441.575	450.252	444.093	523.773	512.608	P50518	Atp6v1e1	3	4	39727.7	65223.2	0.715239	1.81206	1.89949
Q9D1K2	Atp6v1f	V-type proton ATPase subunit F	VATF_MOUSE	13370.3	3	3	6	3	9	8	8	788794	1.7076e+06	3.27153e+06	1.13571e+06	4840780	3.1022e+06	4123374	Q9D1K2	Atp6v1f	13370.3		13370.3	Atp6v1f	3123.38	7260.83	15138	4735.51	14444.2	9632.63	11373.8	Atp6v1f	22.8956	43.3146	89.9088	36.4915	193.657	121.821	130.596	Q9D1K2	Atp6v1f	3	4	11816.9	7564.44	-0.643546	0.700524	0.920509
Q9CR51	Atp6v1g1	V-type proton ATPase subunit G 1	VATG1_MOUSE	13724.4	5	5	7	7	7	8	9	16869816	20383308	17248552	18006836	7.67499e+06	8.38665e+06	10317955	Q9CR51	Atp6v1g1	13724.4		13724.4	Atp6v1g1	65075.8	84434.6	77753.1	73144.6	22310.2	25369.4	27726.4	Atp6v1g1	477.031	503.696	461.796	563.648	299.118	320.839	318.36	Q9CR51	Atp6v1g1	3	4	25135.3	75102	1.57913	4.33177	3.48368
Q8BVE3	Atp6v1h	V-type proton ATPase subunit H	VATH_MOUSE	55855	25	23	23	23	23	24	24	23716472	29989590	28979382	27204370	18897354	18660298	21675832	Q8BVE3	Atp6v1h	55855		55855	Atp6v1h	22479.7	30524.5	32098.6	27152.8	13497.6	13869.9	14312.2	Atp6v1h	164.785	182.094	190.642	209.238	180.966	175.407	164.336	Q8BVE3	Atp6v1h	3	4	13893.2	28063.9	1.01433	3.13118	2.90068
Q64430	Atp7a	Copper-transporting ATPase 1	ATP7A_MOUSE	161959	2	3	0	1	1	2	0	410829	566083	NaN	218092	66142.6	180216	NaN	Q64430	Atp7a	161959		161959	Atp7a	134.295	198.708		75.0711	16.2928	46.1959		Atp7a	0.984434	1.18539		0.578493	0.218441	0.584224		Q64430	Atp7a	2	3	31.2443	136.025	2.1222	1.19026	1.35905
P70704-2	Atp8a1	AT8Isoform 2 of Phospholipid-transporting ATPase IA	AT8A1_MO	129767	17	16	14	16	25	24	27	4525547	4704491	4.00969e+06	3700661	5.6663e+06	5.95527e+06	8109026	P70704	Atp8a1	129767		129767	Atp8a1	1846.33	2061.05	1911.64	1589.84	1742.03	1905.26	2304.62	Atp8a1	13.5343	12.2952	11.3537	12.2512	23.3558	24.0951	26.4621	P70704	Atp8a1	3	4	1983.97	1852.22	-0.0991356	0.28831	0.548284
A2ANX3;Q69Z59	Atp8b4	A2Phospholipid-transporting ATPase;Q69Phospholipid-transporting ATPase (Fragment)	A2ANX3_MOU;Q69Z59_MO	135142.55;90591.41	1	1	1	1	1	1	1	11223874	63371184	58681340	40531800	100643824	44552960	70555368	A2ANX3	Atp8b4	135143		135143	Atp8b4	4396.96	26658.7	26863.7	16720.2	29710.8	13686.7	19254.5	Atp8b4	32.2315	159.033	159.551	128.845	398.34	173.091	221.083	A2ANX3	Atp8b4	3	4	20884	18659.9	-0.162456	0.196011	0.466507
P98195;P98195-2	Atp9b	Probable phospholipid-transporting ATPase IIB;Isoform 2 of Probable phospholipid-transporting ATPase IIB	ATP9B_MOUSE	129017.06;129017.06-2	7	11	10	10	12	13	11	1.82602e+06	3.11956e+06	2304412	2.41841e+06	1.65204e+06	1.82637e+06	2152855	P98195	Atp9b	129017		129017	Atp9b	749.309	1374.63	1105.02	1045.01	510.849	587.701	615.405	Atp9b	5.49273	8.20036	6.56303	8.05279	6.84908	7.43245	7.0662	P98195	Atp9b	3	4	571.318	1068.49	0.90321	1.94028	2.00774
Q811I0	Atpaf1	ATP synthase mitochondrial F1 complex assembly factor 1	ATPF1_MOUSE	36354.5	10	8	9	7	7	10	8	3318172	3.72312e+06	3692807	2.7777e+06	1.07868e+06	2136459	1.81404e+06	Q811I0	Atpaf1	36354.5		36354.5	Atpaf1	4832.18	5822.21	6284.3	4259.57	1183.73	2439.79	1840.28	Atpaf1	35.4218	34.7325	37.3241	32.824	15.8706	30.8551	21.1304	Q811I0	Atpaf1	3	4	1821.26	5299.56	1.54093	2.52017	2.46637
Q91YY4	Atpaf2	ATP synthase mitochondrial F1 complex assembly factor 2	ATPF2_MOUSE	33289	10	10	10	10	9	9	8	4611822	5359990	4549336	3.92656e+06	1.40647e+06	1.40099e+06	1.45238e+06	Q91YY4	Atpaf2	33289		33289	Atpaf2	7334.56	9153.82	8454.84	6575.82	1685.58	1747.22	1609.06	Atpaf2	53.7652	54.6073	50.2156	50.6728	22.599	22.0965	18.4755	Q91YY4	Atpaf2	3	4	1680.62	7879.76	2.22916	4.91589	3.54164	up
Q9JKK8	Atr	Serine/threonine-protein kinase ATR	ATR_MOUSE	300224	32	37	39	28	14	17	23	6739093	8753750	8.14868e+06	4.59756e+06	1.77346e+06	1945331	4.35725e+06	Q9JKK8	Atr	300224		300224	Atr	1188.39	1657.63	1679.19	853.729	235.665	269.007	535.255	Atr	8.71136	9.88863	9.97317	6.57878	3.15962	3.40204	6.14589	Q9JKK8	Atr	3	4	346.642	1344.74	1.9558	2.33558	2.32321
Q6PGD0	Atraid	All-trans retinoic acid-induced differentiation factor	ARAID_MOUSE	23857.5	0	1	1	1	1	1	0	NaN	78930.7	79935.4	55683.6	37112.8	38319.5	NaN	Q6PGD0	Atraid	23857.5		23857.5	Atraid		188.088	207.287	130.119	62.0608	66.6822		Atraid		1.12204	1.23113	1.00269	0.832065	0.843308		Q6PGD0	Atraid	2	3	64.3715	175.165	1.44422	1.88455	1.96094
Q8BMG1	Atrip	ATR-interacting protein	ATRIP_MOUSE	85547.5	5	7	5	5	3	4	4	1.0104e+06	5457480	1.24032e+06	825130	227734	343034	484215	Q8BMG1	Atrip	85547.5		85547.5	Atrip	625.303	3626.8	896.986	537.717	106.204	166.473	208.749	Atrip	4.58372	21.6358	5.32744	4.14361	1.4239	2.10533	2.3969	Q8BMG1	Atrip	3	4	160.475	1421.7	3.1472	1.75815	1.85406
Q9WU60	Atrn	Attractin	ATRN_MOUSE	158058	1	2	2	1	0	0	0	70456.2	181253	103182	74249.2	NaN	NaN	NaN	Q9WU60	Atrn	158058		158058	Atrn	23.5996	65.1941	40.3873	26.1887				Atrn	0.172994	0.388917	0.239871	0.201808				Q9WU60	Atrn		4		38.8424				up-a
Q61687	Atrx	Transcriptional regulator ATRX	ATRX_MOUSE	278587	62	62	60	59	60	66	57	30704298	41269388	34697300	28331312	23653288	24486704	29464004	Q61687	Atrx	278587		278587	Atrx	5835	8421.84	7705.37	5669.5	3387.27	3649.09	3900.54	Atrx	42.7729	50.2406	45.7642	43.6888	45.414	46.1489	44.7867	Q61687	Atrx	3	4	3645.64	6907.93	0.922082	2.43341	2.40037
P28658	Atxn10	Ataxin-10	ATX10_MOUSE	53706.9	26	26	27	26	22	21	22	41201668	54880976	61672976	44385872	6506428	6543468	8914688	P28658	Atxn10	53706.9		53706.9	Atxn10	40615.1	58094	71043.3	46073.7	4833.17	5058.17	6121.67	Atxn10	297.725	346.561	421.945	355.041	64.7995	63.969	70.2902	P28658	Atxn10	3	4	5337.67	53956.5	3.33752	4.54431	3.50698	up
P0C7T6	Atxn1l	Ataxin-1-like	ATX1L_MOUSE	73374.3	3	3	0	1	5	5	5	1.86219e+06	1.00853e+06	NaN	172949	722583	578369	1.10847e+06	P0C7T6	Atxn1l	73374.3		73374.3	Atxn1l	1343.64	781.417		131.405	392.883	327.248	557.153	Atxn1l	9.8494	4.66156		1.0126	5.26748	4.13859	6.39734	P0C7T6	Atxn1l	3	3	425.761	752.154	0.820983	0.109861	0.391071
O70305	Atxn2	Ataxin-2	ATX2_MOUSE	136485	20	21	22	20	15	15	13	5259513	7570901	6.25874e+06	4.65601e+06	1.77389e+06	1.80614e+06	1968787	O70305	Atxn2	136485		136485	Atxn2	2040.15	3153.56	2837	1901.81	518.514	549.391	531.995	Atxn2	14.9551	18.8126	16.8497	14.6552	6.95184	6.94797	6.10846	O70305	Atxn2	3	4	533.3	2483.13	2.21914	3.83658	3.3024	up
Q7TQH0-2	Atxn2l	Isoform 2 of Ataxin-2-like protein	ATX2L_MOUSE	113043	45	45	47	46	41	41	38	92001792	109919080	101145576	80431120	31046032	31404730	37490016	Q7TQH0	Atxn2l	113043		113043	Atxn2l	43087.8	55280	55355.5	39666	10956.7	11533.6	12231.1	Atxn2l	315.85	329.773	328.771	305.663	146.899	145.862	140.439	Q7TQH0	Atxn2l	3	4	11573.8	48347.3	2.06257	4.40418	3.49744
Q9CVD2	Atxn3	Ataxin-3	ATX3_MOUSE	40533.3	13	14	14	15	15	15	15	6.31515e+06	6891049	6973587	6369477	5861427	5.35292e+06	6524452	Q9CVD2	Atxn3	40533.3		40533.3	Atxn3	8248.49	9665.25	10643.9	8760.53	5769.13	5482.7	5936.44	Atxn3	60.4647	57.6582	63.2173	67.5081	77.3482	69.3379	68.1633	Q9CVD2	Atxn3	3	4	5729.42	9329.55	0.703418	3.03696	2.83973
Q8R4I1	Atxn7	Ataxin-7	ATX7_MOUSE	92697	1	2	2	1	0	0	0	35849.4	165546	175513	36486.1	NaN	NaN	NaN	Q8R4I1	Atxn7	92697		92697	Atxn7	20.4748	101.53	117.139	21.9432				Atxn7	0.150088	0.605677	0.695721	0.169093				Q8R4I1	Atxn7		4		65.2717				up-a
B7ZCC4;B7ZMR6;Q5HZJ2;Q8C8K6	Atxn7l2	B7Ataxin 7-like 2;B7Atxn7l2 protein;Q5Atxn7l2 protein (Fragment);Q8C8Ataxin 7-like 2	B7ZCC4_MOU;B7ZMR6_MOU;Q5HZJ2_MOU;Q8C8K6_M	69998.95;74014.58;74057.61;73986.53	5	6	4	0	0	3	2	805994	591142	481660	NaN	NaN	242692	141469	B7ZCC4	Atxn7l2	69998.9		69998.9	Atxn7l2	609.597	480.109	425.703			143.939	74.5354	Atxn7l2	4.46858	2.8641	2.52837			1.82035	0.855829	B7ZCC4	Atxn7l2	2	3	109.237	505.136	2.20921	1.95043	2.01595	up
A2AWT3;A2AWT3-2	Atxn7l3	AT7Ataxin-7-like protein 3;AT7Isoform 2 of Ataxin-7-like protein 3	AT7L3_MO	38593.92;38593.92-2	3	2	2	2	0	2	1	486630	395525	376912	310286	NaN	53878.6	40591.2	A2AWT3	Atxn7l3	38593.9		38593.9	Atxn7l3	667.548	582.633	604.197	448.21		57.9579	38.7889	Atxn7l3	4.89339	3.4757	3.58849	3.45387		0.732974	0.445381	A2AWT3	Atxn7l3	2	4	48.3734	575.647	3.5729	3.8258	3.2965	up
Q9JLZ3	Auh	Methylglutaconyl-CoA hydratase, mitochondrial	AUHM_MOUSE	33395	9	10	9	8	9	10	10	14103589	18175446	15481394	12075225	4271482	5912660	6746206	Q9JLZ3	Auh	33395		33395	Auh	22358.9	30941.6	28680.5	20158.2	5102.89	7350.5	7450.27	Auh	163.9	184.583	170.341	155.338	68.4157	92.9593	85.5454	Q9JLZ3	Auh	3	4	6634.55	25534.8	1.94439	3.4317	3.08319
P70295	Aup1	Lipid droplet-regulating VLDL assembly factor AUP1	AUP1_MOUSE	46121.3	12	12	13	11	12	12	14	10188771	10911380	9547733	7.43781e+06	4699723	5772149	7839476	P70295	Aup1	46121.3		46121.3	Aup1	11695.6	13449.9	12807.3	8990.46	4065.27	5195.79	6268.73	Aup1	85.7334	80.2353	76.0659	69.2799	54.5041	65.7094	71.9787	P70295	Aup1	3	4	5176.6	11735.8	1.18084	2.56933	2.50275
P97477;P97477-2	Aurka	Aurora kinase A;Isoform 2 of Aurora kinase A	AURKA_MOUSE	44772.04;44772.04-2	1	3	3	3	0	0	0	41257.5	505243	508797	276968	NaN	NaN	NaN	P97477	Aurka	44772		44772	Aurka	48.7863	641.554	703.066	344.875				Aurka	0.357623	3.8272	4.1757	2.65758				P97477	Aurka		4		434.57				up-a
Q9DCJ7	Aurkaip1	Small ribosomal subunit protein mS38	AKIP_MOUSE	23300.3	1	0	1	0	1	1	2	822475	NaN	928116	NaN	344401	375467	409116	Q9DCJ7	Aurkaip1	23300.3		23300.3	Aurkaip1	1868.8		2464.33		589.687	668.998	647.557	Aurkaip1	13.699		14.6363		7.90608	8.46059	7.43536	Q9DCJ7	Aurkaip1	3	2	635.414	2166.56	1.76964	2.75603	2.64112
O70126	Aurkb	Aurora kinase B	AURKB_MOUSE	39384.3	8	11	12	10	0	0	0	2299085	7299734	7.31811e+06	2.80237e+06	NaN	NaN	NaN	O70126	Aurkb	39384.3		39384.3	Aurkb	3090.54	10537.2	11495.7	3966.8				Aurkb	22.6549	62.8595	68.2759	30.5679				O70126	Aurkb		4		7272.54				up-a
Q9D9K3	Aven	Cell death regulator Aven	AVEN_MOUSE	37195.5	14	14	13	12	6	7	7	7.25033e+06	9006178	7.52064e+06	4591674	1.25449e+06	1.07501e+06	1.36132e+06	Q9D9K3	Aven	37195.5		37195.5	Aven	10319.8	13765.4	12509	6882.07	1345.54	1199.88	1349.78	Aven	75.648	82.1179	74.2943	53.0328	18.04	15.1745	15.4984	Q9D9K3	Aven	3	4	1298.4	10869.1	3.06542	4.03145	3.3827	up
Q80U56	Avl9	Late secretory pathway protein AVL9 homolog	AVL9_MOUSE	72185.6	17	15	15	17	18	18	15	7646350	6.96827e+06	8121002	7.63506e+06	4.44862e+06	5.51136e+06	6.78424e+06	Q80U56	Avl9	72185.6		72185.6	Avl9	5607.98	5488	6960.13	5896.58	2458.63	3169.74	3466.13	Avl9	41.1087	32.7387	41.3381	45.4387	32.9635	40.0866	39.7987	Q80U56	Avl9	3	4	3031.5	5988.17	0.982084	2.86455	2.71779
O35625;O35625-2	Axin1	Axin-1;Isoform 2 of Axin-1	AXIN1_MOUSE	96275.65;96275.65-2	1	3	4	3	2	3	4	131628	414612	564514	367131	286479	255277	389845	O35625	Axin1	96275.6		96275.6	Axin1	72.3824	244.83	362.758	212.59	118.712	110.081	149.338	Axin1	0.530592	1.46054	2.15451	1.6382	1.5916	1.39215	1.71472	O35625	Axin1	3	4	126.043	223.14	0.824028	0.459965	0.703045
B1ARW8		Uncharacterized protein C1orf122 homolog	CA122_MOUSE	11318.5	1	0	0	0	0	0	0	264827	NaN	NaN	NaN	NaN	NaN	NaN	B1ARW8	B1ARW8	11318.5		11318.5	B1ARW8	1238.72							B1ARW8	9.08033							B1ARW8	B1ARW8		1		1238.72
P01887	B2m	Beta-2-microglobulin	B2MG_MOUSE	13779	6	5	5	5	7	5	5	50958580	60810788	68506128	51936396	74512824	67351160	89350976	P01887	B2m	13779		13779	B2m	195795	250901	307589	210132	215741	202929	239153	B2m	1435.26	1496.76	1826.85	1619.27	2892.5	2566.37	2746	P01887	B2m	3	4	219274	241105	0.136922	0.263306	0.526163
Q91Z92	B3galt6	B3Beta-1,3-galactosyltransferase 6	B3GT6_MOU	37021.2	9	9	8	8	7	6	6	2392173	2477477	2.20038e+06	2.02058e+06	532940	614006	628343	Q91Z92	B3galt6	37021.2		37021.2	B3galt6	3420.93	3804.51	3677.1	3042.73	574.311	688.553	625.95	B3galt6	25.0768	22.6958	21.8393	23.4471	7.69993	8.7079	7.18727	Q91Z92	B3galt6	3	4	629.604	3486.31	2.46919	5.57726	3.54351	up
P58158	B3gat3	B3Galactosylgalactosylxylosylprotein 3-beta-glucuronosyltransferase 3	B3GA3_MOU	37066.9	6	6	6	6	5	6	6	1.24405e+06	1.51991e+06	1.3501e+06	1.20042e+06	858406	925314	1.2853e+06	P58158	B3gat3	37066.9		37066.9	B3gat3	1776.87	2331.16	2253.4	1805.45	923.903	1036.38	1278.83	B3gat3	13.0251	13.9066	13.3835	13.9127	12.387	13.1067	14.6838	P58158	B3gat3	3	4	1079.7	2041.72	0.919149	2.56373	2.49846
Q9Z222	B3GNT2	B3N-acetyllactosaminide beta-1,3-N-acetylglucosaminyltransferase 2	B3GN2_MOU	45883	7	7	4	3	5	6	6	1.35161e+06	2.09548e+06	1.43193e+06	1.03659e+06	1.00377e+06	1259954	1.81178e+06	Q9Z222	B3GNT2	45883		45883	B3GNT2	1559.56	2596.4	1930.77	1259.49	872.774	1140.03	1456.29	B3GNT2	11.4322	15.4888	11.4673	9.70557	11.7015	14.4176	16.7214	Q9Z222	B3GNT2	3	4	1156.37	1836.55	0.667403	1.00891	1.1958
Q8BGY6	B3gnt5	B3Lactosylceramide 1,3-N-acetyl-beta-D-glucosaminyltransferase	B3GN5_MOU	43913.9	2	0	0	0	0	0	0	190705	NaN	NaN	NaN	NaN	NaN	NaN	Q8BGY6	B3gnt5	43913.9		43913.9	B3gnt5	229.913							B3gnt5	1.68535							Q8BGY6	B3gnt5		1		229.913
Q8K0J2	B3gnt7	B3UDP-GlcNAc:betaGal beta-1,3-N-acetylglucosaminyltransferase 7	B3GN7_MOU	45378.6	8	7	8	7	0	0	0	2.14052e+06	1.8697e+06	2208142	1.77882e+06	NaN	NaN	NaN	Q8K0J2	B3gnt7	45378.6		45378.6	B3gnt7	2497.3	2342.4	3010.47	2185.34				B3gnt7	18.3062	13.9736	17.88	16.8401				Q8K0J2	B3gnt7		4		2508.87				up-a
Q8R3I9	B3gnt8	B3UDP-GlcNAc:betaGal beta-1,3-N-acetylglucosaminyltransferase 8	B3GN8_MOU	43370.2	0	1	2	4	9	10	10	NaN	20272.8	167758	461605	2764411	2.37759e+06	3.46015e+06	Q8R3I9	B3gnt8	43370.2		43370.2	B3gnt8		26.5743	239.304	593.359	2542.91	2275.94	2942.37	B3gnt8		0.158529	1.42129	4.57239	34.0934	28.783	33.7848	Q8R3I9	B3gnt8	3	3	2587.07	286.413	-3.17515	1.4124	1.55579
Q09200	B4galnt1	B4Beta-1,4 N-acetylgalactosaminyltransferase 1	B4GN1_MOU	59211.9	17	16	17	16	17	17	18	14614040	18551990	14672296	12570354	12984338	13133104	19701036	Q09200	B4galnt1	59211.9		59211.9	B4galnt1	13066.6	17812.3	15330.2	11835.2	8748.42	9208.17	12270.8	B4galnt1	95.7835	106.26	91.05	91.2015	117.292	116.453	140.896	Q09200	B4galnt1	3	4	10075.8	14511.1	0.526261	1.3351	1.48835
P15535	B4galt1	B4Beta-1,4-galactosyltransferase 1	B4GT1_MOU	44411.1	12	13	13	13	8	8	6	13049977	14474976	12466265	10831632	1.98621e+06	2.05789e+06	2.11969e+06	P15535	B4galt1	44411.1		44411.1	B4galt1	15556.8	18529.6	17366.1	13596.9	1784.23	1923.74	1760.25	B4galt1	114.038	110.539	103.142	104.777	23.9217	24.3289	20.2115	P15535	B4galt1	3	4	1822.74	16262.4	3.15736	5.81497	3.59318	up
Q9JMK0	B4galt5	B4Beta-1,4-galactosyltransferase 5	B4GT5_MOU	44814.2	5	3	5	5	0	0	0	1.43459e+06	754988	2.75268e+06	1.99254e+06	NaN	NaN	NaN	Q9JMK0	B4galt5	44814.2		44814.2	B4galt5	1694.78	957.776	3800.13	2478.73				B4galt5	12.4234	5.71363	22.57	19.1009				Q9JMK0	B4galt5		4		2232.85				up-a
Q8R087	B4galt7	B4Beta-1,4-galactosyltransferase 7	B4GT7_MOU	37754.3	2	2	2	2	2	1	1	449086	637669	517304	581662	177754	133604	216692	Q8R087	B4galt7	37754.3		37754.3	B4galt7	629.747	960.215	847.691	858.901	187.833	146.916	211.676	B4galt7	4.6163	5.72817	5.03467	6.61863	2.51833	1.85799	2.4305	Q8R087	B4galt7	3	4	182.142	824.139	2.17783	3.93012	3.34238
Q3UI43	Babam1	BRISC and BRCA1-A complex member 1	BABA1_MOUSE	36793.1	11	10	12	11	11	11	11	10783943	12433495	11845506	9084787	8530128	8535667	13024050	Q3UI43	Babam1	36793.1		36793.1	Babam1	15517.2	19211.7	19918	13765.3	9249.28	9631.33	13054.9	Babam1	113.747	114.608	118.298	106.075	124.007	121.804	149.899	Q3UI43	Babam1	3	4	10645.2	17103.1	0.684056	1.73228	1.83211
Q8K3W0	Babam2	BRISC and BRCA1-A complex member 2	BABA2_MOUSE	43544.7	15	16	16	16	17	16	16	21780720	26816144	24236142	18598366	20688278	18088534	24786128	Q8K3W0	Babam2	43544.7		43544.7	Babam2	26481.3	35010.7	34433.9	23811	18954.3	17245.8	20992.6	Babam2	194.118	208.857	204.512	183.486	254.125	218.102	241.041	Q8K3W0	Babam2	3	4	19064.2	29934.2	0.650926	1.79785	1.88826
P97303	Bach2	Transcription regulator protein BACH2	BACH2_MOUSE	91836	16	18	18	17	24	24	22	4732687	5.56329e+06	6.68508e+06	5172691	8034023	7.89247e+06	8817308	P97303	Bach2	91836		91836	Bach2	2728.33	3443.96	4503.52	3140.09	3490.11	3567.92	3540.92	Bach2	19.9997	20.545	26.7476	24.1973	46.7928	45.1223	40.6576	P97303	Bach2	3	4	3532.98	3453.97	-0.0326301	0.11715	0.397482
Q60739	Bag1	BAG family molecular chaperone regulator 1	BAG1_MOUSE	39740.3	12	12	12	11	15	15	15	14210307	17600696	14277510	11010780	12105320	13745279	15111822	Q60739	Bag1	39740.3		39740.3	Bag1	18931	25179	22226.9	15446.3	12152.5	14359.4	14024.2	Bag1	138.772	150.206	132.012	119.028	162.931	181.599	161.029	Q60739	Bag1	3	4	13512	20445.8	0.59756	1.53439	1.66291
Q91YN9	Bag2	BAG family molecular chaperone regulator 2	BAG2_MOUSE	23473.6	1	2	1	0	0	0	0	212283	536930	72999.8	NaN	NaN	NaN	NaN	Q91YN9	Bag2	23473.6		23473.6	Bag2	478.783	1300.4	192.398					Bag2	3.50967	7.75755	1.1427					Q91YN9	Bag2		3		657.193
Q8CI61	Bag4	BAG family molecular chaperone regulator 4	BAG4_MOUSE	49094.7	5	8	8	7	9	9	7	1.46891e+06	2.33399e+06	2.06147e+06	1.69733e+06	1.52158e+06	1.54818e+06	1.28813e+06	Q8CI61	Bag4	49094.7		49094.7	Bag4	1584.02	2702.73	2597.77	1927.39	1236.46	1309.19	967.651	Bag4	11.6115	16.1232	15.4288	14.8524	16.5775	16.5568	11.1108	Q8CI61	Bag4	3	4	1171.1	2202.98	0.911592	1.83016	1.9144
Q8CI32	Bag5	BAG family molecular chaperone regulator 5	BAG5_MOUSE	50942.5	20	21	22	20	21	21	24	13732945	35677800	31938126	11929116	10076364	46018608	18125330	Q8CI32	Bag5	50942.5		50942.5	Bag5	14272	39815.9	38787.1	13054.7	7891.19	37503.2	13122	Bag5	104.62	237.523	230.367	100.599	105.799	474.29	150.669	Q8CI32	Bag5	3	4	19505.5	26482.4	0.441158	0.304933	0.563919
Q9Z1R2	Bag6	Large proline-rich protein BAG6	BAG6_MOUSE	121037	31	31	33	30	31	32	32	41017872	54541284	49889588	36713228	15164637	18201212	22655878	Q9Z1R2	Bag6	121037		121037	Bag6	17941.4	25618	25500.5	16909.9	4998.41	6243.04	6903.27	Bag6	131.517	152.825	151.454	130.307	67.0149	78.9536	79.2647	Q9Z1R2	Bag6	3	4	6048.24	21492.4	1.82924	3.34971	3.0331
Q497V6;Q497V6-2	Bahd1	Bromo adjacent homology domain-containing 1 protein;Isoform 2 of Bromo adjacent homology domain-containing 1 protein	BAHD1_MOUSE	83871.02;83871.02-2	3	4	5	6	6	6	4	624937	913176	1.30593e+06	1.10417e+06	720350	1.22532e+06	606329	Q497V6	Bahd1	83871		83871	Bahd1	394.482	618.988	963.31	733.944	342.65	606.531	266.618	Bahd1	2.89171	3.69258	5.72135	5.65572	4.59399	7.67059	3.06136	Q497V6	Bahd1	3	4	405.266	677.681	0.741735	0.849777	1.0542
Q8BKX1;Q8BKX1-2;Q8BKX1-3;Q8BKX1-4	Baiap2	Brain-specific angiogenesis inhibitor 1-associated protein 2;Isoform 2 of Brain-specific angiogenesis inhibitor 1-associated protein 2;Isoform 3 of Brain-specific angiogenesis inhibitor 1-associated protein 2;Isoform 4 of Brain-specific angiogenesis inhibitor 1-associated protein 2	BAIP2_MOUSE	59236.87;59236.87-2;59236.87-3;59236.87-4	12	12	13	11	7	10	7	2.64496e+06	4.2199e+06	4.55526e+06	3529780	784436	998726	992885	Q8BKX1	Baiap2	59236.9		59236.9	Baiap2	2363.9	4049.95	4757.51	3321.96	528.305	699.954	618.16	Baiap2	17.3283	24.16	28.2561	25.5988	7.08311	8.85208	7.09783	Q8BKX1	Baiap2	3	4	615.473	3623.33	2.55755	3.58407	3.17014	up
O08734	Bak1	Bcl-2 homologous antagonist/killer	BAK_MOUSE	23294.6	9	9	9	9	10	9	9	8736220	11272883	9212304	7217174	6941883	6034455	7922416	O08734	Bak1	23294.6		23294.6	Bak1	19855.1	27511.9	24466.5	17272.3	11888.9	10754.7	12542.9	Bak1	145.545	164.122	145.313	133.099	159.397	136.011	144.02	O08734	Bak1	3	4	11728.8	22276.4	0.92546	2.33636	2.32382
O54962	Banf1	Barrier-to-autointegration factor	BAF_MOUSE	10102.6	5	6	6	5	10	10	10	10389490	13375622	15805937	12766589	15935142	12939727	20876964	O54962	Banf1	10102.6		10102.6	Banf1	54445.8	75269.9	96793.5	70450	62927.8	53175.1	76212.9	Banf1	399.109	449.023	574.883	542.883	843.689	672.487	875.091	O54962	Banf1	3	4	64105.3	74239.8	0.211749	0.352316	0.606464
Q80VH0	Bank1	B-cell scaffold protein with ankyrin repeats	BANK1_MOUSE	89405.7	39	41	45	43	53	52	55	104674760	118436128	97518952	99791216	135715808	130123408	171477536	Q80VH0	Bank1	89405.7		89405.7	Bank1	61983.9	75311	67481.1	62225.1	60559.8	60423.5	70735.2	Bank1	454.367	449.269	400.788	479.503	811.94	764.155	812.195	Q80VH0	Bank1	3	4	63906.2	66750.3	0.0628191	0.250287	0.514839
Q8VBU8;Q8VBU8-4	Banp	Protein BANP;Isoform 4 of Protein BANP	BANP_MOUSE	59656.7;59656.7-4	7	10	7	7	11	11	11	3.79705e+06	2.97323e+06	1.93776e+06	1.7216e+06	2729730	2.77514e+06	3.61021e+06	Q8VBU8	Banp	59656.7		59656.7	Banp	3369.69	2833.4	2009.55	1608.84	1825.49	1931.26	2231.86	Banp	24.7012	16.9027	11.9352	12.3976	24.4748	24.424	25.6266	Q8VBU8	Banp	3	4	1996.21	2455.37	0.29868	0.354849	0.608712
Q99PU7	Bap1	Ubiquitin carboxyl-terminal hydrolase BAP1	BAP1_MOUSE	80491.7	8	8	7	7	10	9	8	1.2357e+06	1618113	1.24055e+06	1124679	1208264	1.01474e+06	1.0631e+06	Q99PU7	Bap1	80491.7		80491.7	Bap1	812.764	1142.87	953.504	778.962	598.866	523.384	487.097	Bap1	5.95788	6.81782	5.66312	6.00263	8.02915	6.61906	5.59294	Q99PU7	Bap1	3	4	536.449	922.025	0.781365	2.25222	2.25734
Q9DCT6	Bap18	Chromatin complexes subunit BAP18	BAP18_MOUSE	17996.5	2	2	3	3	3	3	3	758820	850479	854081	856423	1031011	1.05157e+06	1.47159e+06	Q9DCT6	Bap18	17996.5		17996.5	Bap18	2232.3	2686.68	2936.09	2653.01	2285.57	2425.85	3015.73	Bap18	16.3637	16.0274	17.4382	20.4439	30.6432	30.6789	34.6271	Q9DCT6	Bap18	3	4	2575.72	2627.02	0.0284541	0.0810265	0.365853
Q9DCT6-2	Bap18	Isoform 2 of Chromatin complexes subunit BAP18	BAP18_MOUSE	16329.8	8	9	8	7	8	9	7	16727673	19688318	17183810	14303111	13731312	14821613	19252316	Q9DCT6	Bap18	16329.8		16329.8	Bap18	54232.2	68543.7	65102.5	48830.2	33546.8	37681.7	43480.7	Bap18	397.544	408.899	386.661	376.282	449.77	476.548	499.253	Q9DCT6	Bap18	3	4	38236.4	59177.2	0.630094	1.91936	1.99019
Q91XV3	Basp1	Brain acid soluble protein 1	BASP1_MOUSE	22086.6	4	6	6	6	4	6	6	462005	2.46112e+06	2122770	2.31199e+06	2137235	3158800	2925192	Q91XV3	Basp1	22086.6		22086.6	Basp1	1107.44	6334.95	5946.1	5835.74	3860.49	5937.57	4884.49	Basp1	8.11797	37.7912	35.3155	44.9699	51.7585	75.0904	56.0846	Q91XV3	Basp1	3	4	4894.18	4806.06	-0.0262135	0.146382	0.422554
O35284	Batf	Basic leucine zipper transcriptional factor ATF-like	BATF_MOUSE	14064.6	1	1	1	1	0	0	0	1.64541e+06	1.82269e+06	2.15006e+06	1.61177e+06	NaN	NaN	NaN	O35284	Batf	14064.6		14064.6	Batf	6193.71	7367.61	9457.63	6388.74				Batf	45.4023	43.9516	56.1714	49.2312				O35284	Batf		4		7351.92				up-a
Q07813	Bax	Apoptosis regulator BAX	BAX_MOUSE	21394.6	10	10	11	10	11	11	11	29674098	39436364	42765464	34488908	22196434	20052740	27926302	Q07813	Bax	21394.6		21394.6	Bax	73430.4	104793	123665	89869.8	41390.3	38912.1	48139.7	Bax	538.274	625.144	734.481	692.531	554.93	492.109	552.749	Q07813	Bax	3	4	42814	97939.6	1.19381	2.64865	2.56246
O88379	Baz1a	Bromodomain adjacent to zinc finger domain protein 1A	BAZ1A_MOUSE	178459	60	63	61	61	54	52	52	67022344	83699408	69021152	55281424	28519804	30080162	35872112	O88379	Baz1a	178459		178459	Baz1a	19883.1	26663.9	23927.8	17269.5	6375.69	6997.72	7413.31	Baz1a	145.751	159.064	142.113	133.077	85.4804	88.4979	85.121	O88379	Baz1a	3	4	6928.91	21936	1.6626	3.66232	3.21536
Q9Z277	Baz1b	Tyrosine-protein kinase BAZ1B	BAZ1B_MOUSE	170651	66	68	70	67	81	83	86	98557792	122464168	105052768	84815496	78831176	86260304	105400552	Q9Z277	Baz1b	170651		170651	Baz1b	30576.3	40798.2	38085.4	27708	18429.3	20985.5	22778.7	Baz1b	224.137	243.382	226.199	213.516	247.086	265.396	261.549	Q9Z277	Baz1b	3	4	20731.2	34292	0.72607	2.0487	2.09615
Q91YE5;Q91YE5-2;Q91YE5-3	Baz2a	Bromodomain adjacent to zinc finger domain protein 2A;Isoform 2 of Bromodomain adjacent to zinc finger domain protein 2A;Isoform 3 of Bromodomain adjacent to zinc finger domain protein 2A	BAZ2A_MOUSE	209618.1;209618.1-2;209618.1-3	25	28	29	25	23	25	22	8.27212e+06	11536838	9556612	6.68783e+06	3.93613e+06	5.28125e+06	5.21839e+06	Q91YE5	Baz2a	209618		209618	Baz2a	2089.25	3128.94	2820.55	1778.67	749.135	1045.98	918.125	Baz2a	15.315	18.6657	16.752	13.7063	10.0438	13.2281	10.5421	Q91YE5	Baz2a	3	4	904.413	2454.35	1.44029	2.60715	2.53246
A2AUY4	Baz2b	Bromodomain adjacent to zinc finger domain protein 2B	BAZ2B_MOUSE	234001	15	17	18	17	16	19	18	2.08294e+06	3.29228e+06	4.18486e+06	3.16487e+06	2.90991e+06	2.79759e+06	4856805	A2AUY4	Baz2b	234001		234001	Baz2b	471.259	799.868	1106.42	754.009	496.112	496.342	765.466	Baz2b	3.45452	4.77162	6.57134	5.81035	6.6515	6.27707	8.78923	A2AUY4	Baz2b	3	4	585.974	782.89	0.417974	0.497947	0.738215
Q8VBW5	Bbx	HMG box transcription factor BBX	BBX_MOUSE	100783	16	13	11	13	9	11	6	4.57798e+06	3.68867e+06	2.73728e+06	2807523	1.23105e+06	1.65529e+06	1.26129e+06	Q8VBW5	Bbx	100783		100783	Bbx	2404.86	2080.77	1680.32	1553.02	487.313	681.873	461.554	Bbx	17.6286	12.4128	9.97985	11.9674	6.53353	8.62342	5.29964	Q8VBW5	Bbx	3	4	543.58	1929.74	1.82784	3.33701	3.02459
Q61334	Bcap29	B-cell receptor-associated protein 29	BAP29_MOUSE	27963.9	13	13	13	15	11	14	10	6145975	8841266	6.62489e+06	5.55354e+06	2.77696e+06	3192509	3937469	Q61334	Bcap29	27963.9		27963.9	Bcap29	11635.8	17974.5	14656.8	11071.6	3961.78	4739.69	5192.94	Bcap29	85.2949	107.227	87.0507	85.317	53.1166	59.9412	59.6263	Q61334	Bcap29	3	4	4631.47	13834.7	1.57875	3.12298	2.89535
Q61335	Bcap31	B-cell receptor-associated protein 31	BAP31_MOUSE	27956.5	18	17	19	18	22	20	21	60143936	77680760	70676640	72023184	47260828	54629300	62033392	Q61335	Bcap31	27956.5		27956.5	Bcap31	113897	157968	156405	143624	67443	81125.5	81834.4	Bcap31	834.907	942.361	928.931	1106.76	904.225	1025.97	939.637	Q61335	Bcap31	3	4	76800.9	142973	0.896551	2.70552	2.6035
Q9QZK2	Bcar3	Breast cancer anti-estrogen resistance protein 3 homolog	BCAR3_MOUSE	92263.1	33	32	37	38	31	28	27	24467382	24953734	28062606	24186976	8.07599e+06	7.80028e+06	9517690	Q9QZK2	Bcar3	92263.1		92263.1	Bcar3	14039.8	15376.1	18817.3	14614.8	3492.1	3509.92	3804.5	Bcar3	102.917	91.7265	111.761	112.62	46.8194	44.3888	43.6839	Q9QZK2	Bcar3	3	4	3602.17	15712	2.12493	5.04279	3.54164
Q9D287	Bcas2	Pre-mRNA-splicing factor SPF27	SPF27_MOUSE	26131.4	15	15	17	16	16	19	19	47912192	78125416	37411508	57594072	37424156	88792936	71880912	Q9D287	Bcas2	26131.4		26131.4	Bcas2	97070	169968	88572.8	122872	57135.7	141069	101448	Bcas2	711.561	1013.95	526.057	946.843	766.033	1784.05	1164.85	Q9D287	Bcas2	3	4	99884.1	119621	0.260141	0.318441	0.575842
Q8CCN5	Bcas3	BCAS3 microtubule associated cell migration factor	BCAS3_MOUSE	101021	15	16	19	17	18	19	16	3936889	4.28831e+06	4.98446e+06	4171469	3.88843e+06	5686289	4.08875e+06	Q8CCN5	Bcas3	101021		101021	Bcas3	2063.21	2413.31	3052.56	2302.05	1535.61	2336.85	1492.7	Bcas3	15.1241	14.3966	18.1299	17.7394	20.5883	29.5534	17.1394	Q8CCN5	Bcas3	3	4	1788.39	2457.78	0.458698	1.05533	1.23674
P24288	Bcat1	Branched-chain-amino-acid aminotransferase, cytosolic	BCAT1_MOUSE	42791.2	12	12	13	12	0	0	0	9292992	12309244	11462757	6141932	NaN	NaN	NaN	P24288	Bcat1	42791.2		42791.2	Bcat1	11497.5	16353.7	16572.7	8001.82				Bcat1	84.2811	97.5582	98.4295	61.6615				P24288	Bcat1		4		13106.4				up-a
O35855	Bcat2	Branched-chain-amino-acid aminotransferase, mitochondrial	BCAT2_MOUSE	44127.4	17	18	18	17	19	20	19	48491288	50836232	47311364	38295072	27253970	29302722	35824304	O35855	Bcat2	44127.4		44127.4	Bcat2	58177.8	65494.4	66330.8	48380.8	24640	27568.6	29940.8	Bcat2	426.467	390.708	393.956	372.819	330.354	348.651	343.786	O35855	Bcat2	3	4	27383.1	59596	1.12193	3.26653	2.98172
Q9CWI3	Bccip	BRCA2 and CDKN1A-interacting protein	BCCIP_MOUSE	35942.1	16	16	16	16	17	17	15	23820532	30152482	29237330	23093550	10475157	13751002	18162688	Q9CWI3	Bccip	35942.1		35942.1	Bccip	35087.3	47693.4	50326	35820	11627.2	15883.5	18636.7	Bccip	257.204	284.516	298.899	276.026	155.889	200.873	213.991	Q9CWI3	Bccip	3	4	15382.5	42231.7	1.45704	2.83427	2.69729
Q91YP1	Bcdin3d	BN3RNA 5'-monophosphate methyltransferase	BN3D2_MO	32034.7	3	3	1	3	3	3	3	549526	622522	193208	393652	197926	184078	307127	Q91YP1	Bcdin3d	32034.7		32034.7	Bcdin3d	908.175	1104.77	373.132	685.063	246.491	238.56	353.583	Bcdin3d	6.65729	6.59055	2.21613	5.27905	3.30476	3.01698	4.0599	Q91YP1	Bcdin3d	3	4	279.544	767.786	1.45763	1.60997	1.72758
P50136	Bckdha	2-oxoisovalerate dehydrogenase subunit alpha, mitochondrial	ODBA_MOUSE	50370.7	10	11	8	8	12	13	12	4.03936e+06	4659212	3.5302e+06	3.18352e+06	5064760	4.14341e+06	4909147	P50136	Bckdha	50370.7		50370.7	Bckdha	4245.58	5258.65	4335.91	3523.46	4011.44	3415.04	3594.36	Bckdha	31.1218	31.3705	25.7521	27.1515	53.7824	43.1888	41.2712	P50136	Bckdha	3	4	3673.61	4340.9	0.240794	0.723629	0.940866
Q6P3A8	Bckdhb	2-oxoisovalerate dehydrogenase subunit beta, mitochondrial	ODBB_MOUSE	42880.3	6	6	7	6	6	5	6	2.27428e+06	2.26138e+06	2.46829e+06	1.95041e+06	1.44444e+06	1.40608e+06	2.09091e+06	Q6P3A8	Bckdhb	42880.3		42880.3	Bckdhb	2807.94	2998.16	3561.21	2535.74	1343.88	1361.35	1798.34	Bckdhb	20.5833	17.8856	21.151	19.5403	18.0177	17.2165	20.6488	Q6P3A8	Bckdhb	3	4	1501.19	2975.76	0.987155	2.70605	2.6036
O55028	Bckdk	[3-methyl-2-oxobutanoate dehydrogenase [lipoamide]] kinase, mitochondrial	BCKD_MOUSE	46587.5	9	10	9	9	8	6	6	3892380	3931782	3.44754e+06	3.19076e+06	1.74819e+06	2.0203e+06	1.73977e+06	O55028	Bckdk	46587.5		46587.5	Bckdk	4423.32	4797.99	4578.24	3818.24	1497.06	1800.37	1377.26	Bckdk	32.4247	28.6225	27.1914	29.4231	20.0714	22.7686	15.814	O55028	Bckdk	3	4	1558.23	4404.45	1.49905	4.11465	3.41754
Q9Z0H7	Bcl10	B-cell lymphoma/leukemia 10	BCL10_MOUSE	25948.3	14	13	11	10	15	15	14	12617788	14252926	13595657	10857629	12278453	12163609	15586238	Q9Z0H7	Bcl10	25948.3		25948.3	Bcl10	25744	31227.2	32415.2	23327.3	18877.9	19461.1	22152.6	Bcl10	188.714	186.287	192.523	179.758	253.1	246.118	254.361	Q9Z0H7	Bcl10	3	4	20163.9	28178.4	0.482818	1.63657	1.75015
Q9QYE3-12	Bcl11a	Isoform 4 of B-cell lymphoma/leukemia 11A	BC11A_MOUSE	44826.1	4	4	3	3	4	4	5	631185	783895	686363	577917	664787	625047	950772	Q9QYE3	Bcl11a	44826.1		44826.1	Bcl11a	745.466	994.183	947.286	718.741	591.658	578.891	782.238	Bcl11a	5.46456	5.93081	5.62618	5.53857	7.9325	7.32104	8.9818	Q9QYE3	Bcl11a	3	4	650.929	851.419	0.387369	1.05493	1.23642
Q9QYE3	Bcl11a	B-cell lymphoma/leukemia 11A	BC11A_MOUSE	83855.5	34	34	34	32	27	29	27	19989726	22971790	23256662	17060978	11742656	10965685	13631882	Q9QYE3	Bcl11a	83855.5		83855.5	Bcl11a	12620.5	15574.1	17158.3	11342.6	5586.68	5429	5995.4	Bcl11a	92.5135	92.9075	101.908	87.405	74.902	68.6587	68.8403	Q9QYE3	Bcl11a	3	4	5670.36	14173.9	1.32172	3.27374	2.98592
Q9QYE3-14	Bcl11a	Isoform 6 of B-cell lymphoma/leukemia 11A	BC11A_MOUSE	21075.2	2	4	0	3	0	0	0	220188	601610	NaN	255956	NaN	NaN	NaN	Q9QYE3	Bcl11a	21075.2		21075.2	Bcl11a	553.127	1622.87		677.069				Bcl11a	4.05464	9.68125		5.21745				Q9QYE3	Bcl11a		3		951.022
P10417	Bcl2	Apoptosis regulator Bcl-2	BCL2_MOUSE	26407.2	2	4	3	3	4	3	4	926402	2829618	1325034	1.18496e+06	2.16504e+06	2.06381e+06	4465676	P10417	Bcl2	26407.2		26407.2	Bcl2	1857.29	6091.78	3104.29	2501.6	3270.86	3244.61	6236.75	Bcl2	13.6147	36.3406	18.4372	19.2772	43.8532	41.0335	71.6115	P10417	Bcl2	3	4	4250.74	3388.74	-0.326964	0.33605	0.591994
Q07440	Bcl2a1	B2Bcl-2-related protein A1	B2LA1_MOU	19914	2	2	2	2	0	0	0	700478	648213	793682	488964	NaN	NaN	NaN	Q07440	Bcl2a1	19914		19914	Bcl2a1	1862.25	1850.54	2465.73	1368.85				Bcl2a1	13.651	11.0394	14.6446	10.5483				Q07440	Bcl2a1		4		1886.85				up-a
Q64373;Q64373-3;Q64373-4	Bcl2l1	B2Bcl-2-like protein 1;B2Isoform Bcl-X(beta) of Bcl-2-like protein 1;B2Isoform Bcl-X(delta-TM) of Bcl-2-like protein 1	B2CL1_MOU	26132.01;26132.01-3;26132.01-4	8	8	8	8	0	0	0	4053095	4918090	5.46665e+06	4.48001e+06	NaN	NaN	NaN	Q64373	Bcl2l1	26132		26132	Bcl2l1	8211.38	10699.5	12942.2	9557.52				Bcl2l1	60.1927	63.828	76.8669	73.6496				Q64373	Bcl2l1		4		10352.6				up-a
O54918	Bcl2l11	B2Bcl-2-like protein 11	B2L11_MOU	22066.6	2	2	2	2	2	2	2	587434	660544	465617	410531	309675	333696	409485	O54918	Bcl2l11	22066.6		22066.6	Bcl2l11	1409.37	1701.79	1305.42	1037.17	559.873	627.815	684.378	Bcl2l11	10.3313	10.152	7.75326	7.99234	7.50636	7.93976	7.85816	O54918	Bcl2l11	3	4	624.022	1363.44	1.12758	2.6978	2.5985
P59017	Bcl2l13	B2Bcl-2-like protein 13	B2L13_MOU	46719.4	15	14	14	14	13	13	13	12459742	13520681	12963314	10155021	11301638	12591689	16031607	P59017	Bcl2l13	46719.4		46719.4	Bcl2l13	14119.3	16452.8	17166.3	12117.8	9650.8	11189.3	12655.3	Bcl2l13	103.5	98.1497	101.955	93.3786	129.391	141.507	145.311	P59017	Bcl2l13	3	4	11165.1	14964.1	0.422501	1.28065	1.43983
Q9Z2F6	Bcl3	B-cell lymphoma 3 protein homolog	BCL3_MOUSE	47216	8	9	8	8	6	5	4	3.40629e+06	4257627	3.9227e+06	3.33682e+06	1152252	1.26308e+06	1.05954e+06	Q9Z2F6	Bcl3	47216		47216	Bcl3	3819.4	5126.47	5139.9	3939.87	973.593	1110.6	827.604	Bcl3	27.9977	30.582	30.5272	30.3604	13.0532	14.0453	9.5027	Q9Z2F6	Bcl3	3	4	970.597	4506.41	2.21503	4.29043	3.47794	up
P41183	Bcl6	B-cell lymphoma 6 protein homolog	BCL6_MOUSE	78981.7	0	3	0	0	10	9	9	NaN	389843	NaN	NaN	1.25162e+06	990756	1.76909e+06	P41183	Bcl6	78981.7		78981.7	Bcl6		280.61			632.213	520.782	826.072	Bcl6		1.67398			8.47624	6.58615	9.48511	P41183	Bcl6	3	1	659.689	280.61	-1.23322	1.05166	1.23338
Q9CXE2	Bcl7a	B-cell CLL/lymphoma 7 protein family member A	BCL7A_MOUSE	22780.8	3	2	2	2	4	4	4	2166429	2.13052e+06	115632	98606.5	2.60703e+06	2.44517e+06	2.3314e+06	Q9CXE2	Bcl7a	22780.8		22780.8	Bcl7a	5034.74	5316.86	314.026	241.31	4565.57	4456.11	3774.34	Bcl7a	36.9067	31.7178	1.86508	1.85952	61.2117	56.3549	43.3377	Q9CXE2	Bcl7a	3	4	4265.34	2726.74	-0.645486	0.581456	0.813337
Q921K9	Bcl7b	B-cell CLL/lymphoma 7 protein family member B	BCL7B_MOUSE	22238.3	8	7	7	6	6	7	6	10761580	12369768	10481336	10856646	8760199	11919923	8934341	Q921K9	Bcl7b	22238.3		22238.3	Bcl7b	25619.8	31622.7	29159	27216.5	15715.6	22252.9	14816.8	Bcl7b	187.803	188.646	173.183	209.728	210.703	281.425	170.129	Q921K9	Bcl7b	3	4	17595.1	28404.5	0.690946	2.04618	2.09384
O08664	Bcl7c	B-cell CLL/lymphoma 7 protein family member C	BCL7C_MOUSE	23445	4	4	5	4	4	5	4	5600786	5825110	5.23411e+06	5.32582e+06	4.1814e+06	4.10397e+06	3861810	O08664	Bcl7c	23445		23445	Bcl7c	12647.4	14125.2	13811.8	12664.1	7115.28	7267.24	6074.84	Bcl7c	92.7106	84.264	82.0322	97.589	95.3963	91.9064	69.7525	O08664	Bcl7c	3	4	6819.12	13312.1	0.965085	4.05976	3.39531
Q9D219	Bcl9	B-cell CLL/lymphoma 9 protein	BCL9_MOUSE	148971	5	7	4	3	6	8	6	881084	873475	375921	227863	527856	1.11134e+06	650552	Q9D219	Bcl9	148971		148971	Bcl9	313.125	333.341	156.118	85.2729	141.362	309.714	161.055	Bcl9	2.29533	1.98855	0.927227	0.657107	1.89528	3.91684	1.84927	Q9D219	Bcl9	3	4	204.044	221.964	0.12145	0.00523832	0.300191
Q67FY2;Q67FY2-2	Bcl9l	B-cell CLL/lymphoma 9-like protein;Isoform 2 of B-cell CLL/lymphoma 9-like protein	BCL9L_MOUSE	156679.75;156679.75-2	7	9	9	5	7	8	8	1.4255e+06	2.06131e+06	2216409	1.13167e+06	989026	1.05796e+06	1.32507e+06	Q67FY2	Bcl9l	156680		156680	Bcl9l	481.678	747.944	875.176	402.665	251.834	280.332	311.904	Bcl9l	3.53089	4.46187	5.1979	3.10291	3.3764	3.54527	3.58134	Q67FY2	Bcl9l	3	4	281.357	626.866	1.15576	1.72045	1.8216
Q8K019;Q8K019-2	Bclaf1	Bcl-2-associated transcription factor 1;Isoform 2 of Bcl-2-associated transcription factor 1	BCLF1_MOUSE	106002.19;106002.19-2	42	39	38	40	36	36	35	77704768	88538480	79494312	69347632	42470332	43038316	52832052	Q8K019	Bclaf1	106002		106002	Bclaf1	38809.2	47485	46395.9	36471.6	15984.2	16856	18381.3	Bclaf1	284.487	283.273	275.558	281.048	214.304	213.173	211.058	Q8K019	Bclaf1	3	4	17073.8	42290.4	1.30854	3.90619	3.33174
A2AG58	Bclaf3	BCLAF1 and THRAP3 family member 3	BCLA3_MOUSE	90111.5	10	13	13	7	0	5	0	2.06498e+06	3.21451e+06	3011735	1.70257e+06	NaN	361337	NaN	A2AG58	Bclaf3	90111.5		90111.5	Bclaf3	1213.22	2028.03	2067.74	1053.33		166.474		Bclaf3	8.89337	12.0982	12.2808	8.11687		2.10534		A2AG58	Bclaf3	1	4	166.474	1590.58	3.25618	1.9677	2.0311	up
Q8CGN4;Q8CGN4-2;Q8CGN4-3;Q8CGN4-4	Bcor	BCL-6 corepressor;Isoform 2 of BCL-6 corepressor;Isoform 3 of BCL-6 corepressor;Isoform 4 of BCL-6 corepressor	BCOR_MOUSE	192630.82;192630.82-2;192630.82-3;192630.82-4	14	14	15	15	14	18	17	2.30787e+06	2.81894e+06	2.89697e+06	2.2687e+06	1.63821e+06	2.00881e+06	2320955	Q8CGN4	Bcor	192631		192631	Bcor	634.289	831.953	930.414	656.583	339.284	432.94	444.36	Bcor	4.64959	4.96303	5.52598	5.05959	4.54887	5.47525	5.10222	Q8CGN4	Bcor	3	4	405.528	763.31	0.912467	2.30449	2.29823
Q6PAJ1	Bcr	Breakpoint cluster region protein	BCR_MOUSE	143072	3	0	8	3	5	7	6	328104	NaN	1.33498e+06	390899	499908	543769	727020	Q6PAJ1	Bcr	143072		143072	Bcr	121.412		577.27	152.317	139.398	157.789	187.407	Bcr	0.889996		3.42856	1.17375	1.86894	1.9955	2.15184	Q6PAJ1	Bcr	3	3	161.531	283.666	0.812383	0.255204	0.519496
Q9CZP5	Bcs1l	Mitochondrial chaperone BCS1	BCS1_MOUSE	47406.2	15	17	15	16	17	17	15	7754410	11369228	6966205	5868817	3.97227e+06	4002516	5.36032e+06	Q9CZP5	Bcs1l	47406.2		47406.2	Bcs1l	8659.96	13634.4	9091.16	6901.67	3342.89	3505.2	4170.13	Bcs1l	63.481	81.3361	53.9949	53.1838	44.819	44.3291	47.8822	Q9CZP5	Bcs1l	3	4	3672.74	9571.79	1.38193	2.48397	2.43955
Q80XN0	Bdh1	D-beta-hydroxybutyrate dehydrogenase, mitochondrial	BDH_MOUSE	38299	12	11	12	12	9	10	10	8759777	11121242	11137656	7.22518e+06	1.60685e+06	2.78487e+06	3.54582e+06	Q80XN0	Bdh1	38299		38299	Bdh1	12109	16508.4	17991.4	10517.2	1673.81	3018.79	3414.47	Bdh1	88.7637	98.4812	106.856	81.0447	22.4412	38.1776	39.2056	Q80XN0	Bdh1	3	4	2702.36	14281.5	2.40186	3.06601	2.85814	up
Q571C7;Q571C7-2	Bdp1	Transcription factor TFIIIB component B'' homolog;Isoform 2 of Transcription factor TFIIIB component B'' homolog	BDP1_MOUSE	270789.67;270789.67-2	13	15	13	8	4	7	5	2.33602e+06	1.48741e+06	909576	570702	372655	424719	484521	Q571C7	Bdp1	270790		270790	Bdp1	456.717	312.276	207.809	117.494	54.9027	65.1156	65.9893	Bdp1	3.34792	1.86288	1.23424	0.905401	0.736094	0.823495	0.757702	Q571C7	Bdp1	3	4	62.0026	273.574	2.14153	1.96034	2.02462
O88597	Becn1	Beclin-1	BECN1_MOUSE	51588.9	15	17	18	17	20	19	18	9822789	13001945	14288117	9585853	10880884	10679117	12418428	O88597	Becn1	51588.9		51588.9	Becn1	10080.5	14328.2	17134.7	10358.9	8414.47	8593.97	8877.77	Becn1	73.8938	85.475	101.768	79.8248	112.815	108.685	101.936	O88597	Becn1	3	4	8628.74	12975.6	0.588575	1.2661	1.42685
Q6PAL0	Bend3	BEN domain-containing protein 3	BEND3_MOUSE	94155.3	14	16	15	14	0	4	0	3.47881e+06	4.94792e+06	4.03554e+06	3.13617e+06	NaN	532508	NaN	Q6PAL0	Bend3	94155.3		94155.3	Bend3	1956.09	2987.57	2651.64	1856.92		234.799		Bend3	14.3389	17.8224	15.7488	14.3093		2.96943		Q6PAL0	Bend3	1	4	234.799	2363.06	3.33115	2.51721	2.46408	up
Q8C6D4-2	Bend5	Isoform 2 of BEN domain-containing protein 5	BEND5_MOUSE	29229.4	8	8	8	8	8	9	8	1.97161e+06	2.2537e+06	2.12431e+06	1.61859e+06	1.73571e+06	1.97752e+06	2132811	Q8C6D4	Bend5	29229.4		29229.4	Bend5	3571.11	4383.44	4496.31	3087.12	2369.06	2808.76	2691.08	Bend5	26.1777	26.1495	26.7048	23.7892	31.7625	35.5215	30.8994	Q8C6D4	Bend5	3	4	2622.97	3884.5	0.566529	1.70171	1.80589
O35623	Bet1	BET1 homolog	BET1_MOUSE	13274.3	2	2	2	2	2	2	2	1.09458e+06	1.27703e+06	1.23849e+06	894793	1.02124e+06	891769	1.05253e+06	O35623	Bet1	13274.3		13274.3	Bet1	4365.53	5469.24	5772.14	3757.93	3069.25	2789.04	2924.25	Bet1	32.001	32.6268	34.2823	28.9583	41.1502	35.2721	33.5768	O35623	Bet1	3	4	2927.52	4841.21	0.72569	2.01184	2.06547
O35153	Bet1l	BET1-like protein	BET1L_MOUSE	12428.2	3	3	4	4	4	4	4	1.84714e+06	2.06949e+06	2.54272e+06	2.0283e+06	764819	745621	617558	O35153	Bet1l	12428.2		12428.2	Bet1l	7868.52	9466.6	12657.5	9098.35	2455.1	2490.72	1832.58	Bet1l	57.6794	56.4731	75.1763	70.1113	32.9162	31.4993	21.0421	O35153	Bet1l	3	4	2259.47	9772.75	2.11278	3.78663	3.27705
Q8R079	Bfar	Bifunctional apoptosis regulator	BFAR_MOUSE	52968.2	5	5	4	5	3	3	3	659596	753951	618497	573613	363187	237357	637529	Q8R079	Bfar	52968.2		52968.2	Bfar	659.273	809.222	722.406	603.73	273.549	186.038	443.894	Bfar	4.83273	4.82742	4.29056	4.6523	3.66754	2.35276	5.09687	Q8R079	Bfar	3	4	301.16	698.658	1.21405	1.99794	2.05546
O35490	Bhmt	Betaine--homocysteine S-methyltransferase 1	BHMT1_MOUSE	45020.5	0	0	0	0	0	1	0	NaN	NaN	NaN	NaN	NaN	16182.4	NaN	O35490	Bhmt	45020.5		45020.5	Bhmt						14.9227		Bhmt						0.188723		O35490	Bhmt	1		14.9227
Q921C5-2	Bicd2	Isoform 2 of Protein bicaudal D homolog 2	BICD2_MOUSE	96647.4	23	27	29	25	18	19	12	7.18724e+06	17805036	13330192	9688604	2.27854e+06	2.63072e+06	1.82211e+06	Q921C5	Bicd2	96647.4		96647.4	Bicd2	3937.08	10473.5	8533.06	5588.68	940.557	1130.05	695.308	Bicd2	28.8604	62.4799	50.6801	43.066	12.6103	14.2914	7.98365	Q921C5	Bicd2	3	4	921.973	7133.08	2.95173	3.04309	2.8434	up
F8VPZ9	Bicra	BRD4-interacting chromatin-remodeling complex-associated protein	BICRA_MOUSE	161354	14	19	19	17	19	20	16	2.7549e+06	4.31095e+06	3.93395e+06	3.35216e+06	3982659	3.88691e+06	3.98281e+06	F8VPZ9	Bicra	161354		161354	Bicra	903.917	1518.92	1508.37	1158.2	984.721	1000.09	910.341	Bicra	6.62607	9.06111	8.95863	8.92503	13.2024	12.6478	10.4527	F8VPZ9	Bicra	3	4	965.052	1272.35	0.398819	0.83399	1.04013
Q8CHH5	Bicral	BRD4-interacting chromatin-remodeling complex-associated protein-like	BICRL_MOUSE	114350	7	6	8	4	12	14	12	1.7323e+06	933746	1165395	1.00628e+06	3393402	3.65752e+06	3.97794e+06	Q8CHH5	Bicral	114350		114350	Bicral	802.026	464.228	630.513	490.593	1183.91	1327.9	1282.96	Bicral	5.87917	2.76936	3.74479	3.78048	15.8729	16.7935	14.7312	Q8CHH5	Bicral	3	4	1264.92	596.84	-1.08363	2.42857	2.39682	down
P70444	Bid	BH3-interacting domain death agonist	BID_MOUSE	21951.6	5	6	5	6	8	6	8	1.76748e+06	3.35233e+06	3.45301e+06	2.07568e+06	4062902	2.46081e+06	3089755	P70444	Bid	21951.6		21951.6	Bid	4262.75	8682.01	9731.72	5271.48	7383.96	4654.02	5191.01	Bid	31.2477	51.7926	57.7993	40.6217	98.9986	58.8578	59.6041	P70444	Bid	3	4	5743	6986.99	0.282868	0.245268	0.510506
O08539	Bin1	Myc box-dependent-interacting protein 1	BIN1_MOUSE	64470.2	25	25	26	24	34	33	33	101441784	138980064	111288944	116477576	199053120	209066848	271927072	O08539	Bin1	64470.2		64470.2	Bin1	83303	122556	106795	100721	123177	134630	155556	Bin1	610.644	731.107	634.285	776.153	1651.46	1702.62	1786.13	O08539	Bin1	3	4	137788	103344	-0.414995	1.34093	1.49359
O08539-2	Bin1	Isoform 2 of Myc box-dependent-interacting protein 1	BIN1_MOUSE	48013.6	1	1	1	1	2	2	2	322285	3955382	4851460	4706555	3947618	3.30329e+06	5293090	O08539	Bin1	48013.6		48013.6	Bin1	355.368	4683.43	6251.25	5464.84	3280.12	2856.26	4065.73	Bin1	2.60499	27.939	37.1278	42.1117	43.9774	36.1222	46.6835	O08539	Bin1	3	4	3400.71	4188.72	0.300675	0.0900088	0.373716
D3Z6Q9	Bin2	Bridging integrator 2	BIN2_MOUSE	52554	16	16	17	17	22	21	22	57835740	75265376	70789896	64129780	76901464	74583472	102955224	D3Z6Q9	Bin2	52554		52554	Bin2	58263	81419.6	83334.3	68028.8	58377.9	58918.6	72249.8	Bin2	427.091	485.71	494.945	524.225	782.686	745.123	829.585	D3Z6Q9	Bin2	3	4	63182.1	72761.4	0.203659	0.535716	0.77253
Q9JI08	Bin3	Bridging integrator 3	BIN3_MOUSE	29650.8	0	4	5	3	4	4	3	NaN	1.9992e+06	2.5554e+06	1.6102e+06	436663	1.04989e+06	603459	Q9JI08	Bin3	29650.8		29650.8	Bin3		3833.18	5331.89	3027.49	587.528	1470.02	750.594	Bin3		22.8669	31.6675	23.3296	7.87714	18.5908	8.61846	Q9JI08	Bin3	3	3	936.047	4064.19	2.11831	2.04892	2.09615
Q62210	Birc2	Baculoviral IAP repeat-containing protein 2	BIRC2_MOUSE	69676.4	15	14	15	11	17	19	15	3.99909e+06	4.63659e+06	3.93167e+06	2.24256e+06	2.7053e+06	2.80663e+06	2.75196e+06	Q62210	Birc2	69676.4		69676.4	Birc2	3038.63	3783.14	3491	1794.31	1548.99	1672.3	1456.63	Birc2	22.2744	22.5684	20.734	13.8268	20.7677	21.1491	16.7253	Q62210	Birc2	3	4	1559.31	3026.77	0.956871	1.57736	1.69988
O08863	Birc3	Baculoviral IAP repeat-containing protein 3	BIRC3_MOUSE	67228.4	8	10	11	10	7	7	6	3556869	4576283	4910516	4041509	1.5664e+06	1.46458e+06	1.61581e+06	O08863	Birc3	67228.4		67228.4	Birc3	2801.03	3869.9	4518.9	3351.42	929.542	904.431	886.404	Birc3	20.5326	23.0859	26.839	25.8259	12.4626	11.438	10.1779	O08863	Birc3	3	4	906.792	3635.31	2.00324	4.02768	3.38199
O88738;O88738-2;O88738-3	Birc6	Baculoviral IAP repeat-containing protein 6;Isoform 2 of Baculoviral IAP repeat-containing protein 6;Isoform 3 of Baculoviral IAP repeat-containing protein 6	BIRC6_MOUSE	532170.13;532170.13-2;532170.13-3	99	113	110	110	82	82	85	36595532	56289868	54531504	42191924	16173139	16767530	23353548	O88738	Birc6	532170		532170	Birc6	3640.66	6013.39	6339.5	4419.95	1212.45	1308.08	1618.44	Birc6	26.6875	35.8729	37.652	34.0598	16.2556	16.5428	18.5832	O88738	Birc6	3	4	1379.65	5103.37	1.88714	3.18747	2.93629
Q8VD62	Bles03	UPF0696 protein C11orf68 homolog	CK068_MOUSE	31845.5	16	15	16	15	14	16	14	22130182	26011962	18828246	17304164	21670150	23451552	30504310	Q8VD62	Bles03	31845.5		31845.5	Bles03	36790.8	46437	36578	30292.9	27147.7	30573	35327	Bles03	269.691	277.021	217.247	233.435	363.976	386.647	405.631	Q8VD62	Bles03	3	4	31015.9	37524.7	0.274831	0.723834	0.940998
P16277	Blk	Tyrosine-protein kinase Blk	BLK_MOUSE	56674.2	14	15	16	15	20	19	20	9729259	9861090	8940264	8.20727e+06	13582653	16839346	25448008	P16277	Blk	56674.2		56674.2	Blk	9088.59	9891.87	9759.4	8073.3	9561.32	12335.4	16560.1	Blk	66.6229	59.0101	57.9637	62.2123	128.191	156.002	190.146	P16277	Blk	3	4	12818.9	9203.29	-0.478055	1.07584	1.2548
O88700	Blm	RecQ-like DNA helicase BLM	BLM_MOUSE	158366	7	13	13	9	1	2	1	1.24106e+06	2.48142e+06	3.24966e+06	1770910	79148.4	146757	183570	O88700	Blm	158366		158366	Blm	414.89	890.797	1269.5	623.409	19.9388	38.4728	42.7499	Blm	3.04131	5.31406	7.53993	4.80395	0.267325	0.486552	0.490862	O88700	Blm	3	4	33.7205	799.651	4.56767	3.55694	3.1521	up
Q8R016	Blmh	Bleomycin hydrolase	BLMH_MOUSE	52511.1	28	29	29	27	33	33	34	50420888	62228872	60665984	48536220	32407622	35443488	53648860	Q8R016	Blmh	52511.1		52511.1	Blmh	50834.9	67372.1	71474.7	51529.2	24621.5	28022.1	37679.3	Blmh	372.64	401.909	424.507	397.081	330.107	354.386	432.641	Q8R016	Blmh	3	4	30107.6	60302.7	1.00209	2.27232	2.2734
Q9QUN3	Blnk	B-cell linker protein	BLNK_MOUSE	50670.7	16	18	16	14	19	20	20	31665150	45358668	29615714	23680804	21065548	23198058	27238174	Q9QUN3	Blnk	50670.7		50670.7	Blnk	33084.7	50891.2	36159.6	26054.2	16585.7	19006.8	19825.1	Blnk	242.524	303.592	214.762	200.772	222.369	240.373	227.635	Q9QUN3	Blnk	3	4	18472.6	36547.4	0.984387	1.92278	1.99341
O55102	Bloc1s1	BL1Biogenesis of lysosome-related organelles complex 1 subunit 1	BL1S1_MO	14281.3	6	6	6	6	7	7	7	3.62644e+06	4613631	3.14766e+06	3.17799e+06	2.48132e+06	2550654	3.09809e+06	O55102	Bloc1s1	14281.3		14281.3	Bloc1s1	13443.6	18366	13635.7	12405.8	6931.61	7414.8	8000.55	Bloc1s1	98.5468	109.563	80.9862	95.598	92.9338	93.7725	91.8638	O55102	Bloc1s1	3	4	7448.99	14462.8	0.957227	2.75822	2.64289
Q9CWG9	Bloc1s2	BL1Biogenesis of lysosome-related organelles complex 1 subunit 2	BL1S2_MO	16299.5	6	6	6	6	4	5	4	5.37525e+06	5503479	5075545	4465023	2.40503e+06	3.42771e+06	2822936	Q9CWG9	Bloc1s2	16299.5		16299.5	Bloc1s2	17459.3	19195.6	19264.9	15271.7	5886.6	8730.63	6387.35	Bloc1s2	127.984	114.512	114.419	117.683	78.9231	110.413	73.3407	Q9CWG9	Bloc1s2	3	4	7001.52	17797.9	1.34596	3.28133	2.99095
Q5U5M8	Bloc1s3	BL1Biogenesis of lysosome-related organelles complex 1 subunit 3	BL1S3_MO	20397.8	4	4	5	5	5	5	5	1.50951e+06	2.12822e+06	2.73655e+06	2.35015e+06	2205477	1.93908e+06	2612997	Q5U5M8	Bloc1s3	20397.8		20397.8	Bloc1s3	3917.92	5931.62	8300.01	6423.18	4313.59	3946.63	4724.43	Bloc1s3	28.7199	35.3851	49.296	49.4966	57.8333	49.9118	54.2468	Q5U5M8	Bloc1s3	3	4	4328.22	6143.18	0.505213	0.81277	1.02092
Q8VED2	Bloc1s4	BL1Biogenesis of lysosome-related organelles complex 1 subunit 4	BL1S4_MO	23111.9	7	7	7	8	7	7	7	3.62613e+06	3937813	3.92411e+06	3.33741e+06	2.23444e+06	2.18265e+06	2.97985e+06	Q8VED2	Bloc1s4	23111.9		23111.9	Bloc1s4	8306.34	9686.32	10504.2	8050.31	3857.02	3920.7	4755.02	Bloc1s4	60.8887	57.7839	62.3874	62.0351	51.712	49.5837	54.598	Q8VED2	Bloc1s4	3	4	4177.58	9136.8	1.12902	3.39596	3.0635
Q8R015	Bloc1s5	BL1Biogenesis of lysosome-related organelles complex 1 subunit 5	BL1S5_MO	21283.1	9	8	9	10	9	11	9	13996720	13769126	15954092	19526572	8.16002e+06	10990710	7932247	Q8R015	Bloc1s5	21283.1		21283.1	Bloc1s5	34817.2	36779.9	46376.2	51148.1	15295.9	21439.1	13745.3	Bloc1s5	255.224	219.411	275.441	394.144	205.076	271.133	157.826	Q8R015	Bloc1s5	3	4	16826.8	42280.4	1.32923	2.71352	2.60953
Q9R0C0	Bloc1s6	BL1Biogenesis of lysosome-related organelles complex 1 subunit 6	BL1S6_MO	19682.4	4	4	4	4	3	4	3	1.10283e+06	1.20916e+06	980150	980420	593621	522161	867596	Q9R0C0	Bloc1s6	19682.4		19682.4	Bloc1s6	2966.41	3492.58	3080.86	2776.98	1203.23	1101.39	1625.67	Bloc1s6	21.7449	20.835	18.2981	21.3992	16.132	13.9289	18.6663	Q9R0C0	Bloc1s6	3	4	1310.1	3079.2	1.23288	3.2023	2.9443
Q5SYL3	Bltp2	Bridge-like lipid transfer protein family member 2	BLTP2_MOUSE	254469	6	8	10	8	11	10	13	487979	739527	1.07981e+06	608625	1.27297e+06	1093197	2.12963e+06	Q5SYL3	Bltp2	254469		254469	Bltp2	101.524	165.218	262.525	133.338	199.573	178.352	308.648	Bltp2	0.744211	0.985613	1.5592	1.02749	2.67572	2.25556	3.54395	Q5SYL3	Bltp2	3	4	228.858	165.651	-0.466302	0.597604	0.827237
B2KF50;Q570Z6	Bltp3a	B2UHRF1 (ICBP90) binding protein 1;Q570MKIAA4127 protein (Fragment)	B2KF50_MOU;Q570Z6_M	157012.14;165581.73	2	3	2	0	1	0	0	115604	328212	222758	NaN	30240	NaN	NaN	B2KF50	Bltp3a	157012		157012	Bltp3a	38.9799	118.839	87.7725		7.68366			Bltp3a	0.285738	0.708938	0.521305		0.103017			B2KF50	Bltp3a	1	3	7.68366	81.864	3.41336	1.11638	1.29176
A2RSJ4	Bltp3b	Bridge-like lipid transfer protein family member 3B	BLT3B_MOUSE	161940	21	22	24	24	25	25	25	4229800	5674732	5.85426e+06	4.37475e+06	4515901	4.63624e+06	5682389	A2RSJ4	Bltp3b	161940		161940	Bltp3b	1382.83	1992.19	2236.54	1506.04	1112.52	1188.58	1294.11	Bltp3b	10.1367	11.8844	13.2834	11.6055	14.9159	15.0315	14.8592	A2RSJ4	Bltp3b	3	4	1198.4	1779.4	0.570277	1.37483	1.52293
Q9CY64	Blvra	Biliverdin reductase A	BIEA_MOUSE	33524.5	16	14	15	17	20	19	19	47705840	55672672	48305532	41250960	34002176	35742240	42622392	Q9CY64	Blvra	33524.5		33524.5	Blvra	75337.5	94410.2	89144.1	68597.8	40463.5	44262.4	46888.8	Blvra	552.254	563.206	529.451	528.61	542.504	559.771	538.386	Q9CY64	Blvra	3	4	43871.5	81872.4	0.900092	2.90153	2.7435
Q923D2	Blvrb	Flavin reductase (NADPH)	BLVRB_MOUSE	22197.3	11	11	12	13	14	14	14	77481264	83376656	78859464	61045408	114645456	113228464	145360512	Q923D2	Blvrb	22197.3		22197.3	Blvrb	184798	213542	219792	153317	206051	211773	241512	Blvrb	1354.65	1273.89	1305.4	1181.45	2762.58	2678.22	2773.09	Q923D2	Blvrb	3	4	219779	192862	-0.188481	0.604483	0.833176
P25916	Bmi1	Polycomb complex protein BMI-1	BMI1_MOUSE	36707.8	6	7	7	7	7	7	7	4.08624e+06	5027732	4601958	4574931	3.18058e+06	2.75606e+06	3.38199e+06	P25916	Bmi1	36707.8		36707.8	Bmi1	5893.43	7786.7	7756.09	6948.08	3456.74	3117.07	3397.88	Bmi1	43.2012	46.4517	46.0655	53.5415	46.3454	39.4205	39.0151	P25916	Bmi1	3	4	3323.9	7096.08	1.09415	3.59398	3.17521
Q91Z96	Bmp2k	BMP-2-inducible protein kinase	BMP2K_MOUSE	126185	18	20	20	18	23	21	21	7.54791e+06	8597714	8779343	6881737	9233826	6.19074e+06	10006178	Q91Z96	Bmp2k	126185		126185	Bmp2k	3166.8	3873.6	4304.4	3040.39	2919.4	2036.81	2924.52	Bmp2k	23.2139	23.108	25.565	23.429	39.1411	25.7588	33.5799	Q91Z96	Bmp2k	3	4	2626.91	3596.3	0.453147	1.13735	1.31121
P23359;P49003;P49003-2	Bmp7;Bmp5;Bmp5	Bone morphogenetic protein 7;Bone morphogenetic protein 5;Isoform 2 of Bone morphogenetic protein 5	BMP7_MOUSE;BMP5_MOUSE;BMP5_MOUSE	49198.75;51511.54;51511.54-2	1	1	1	1	0	1	0	67284	66122	49061.8	51109.3	NaN	55765.6	NaN	P23359	Bmp7	49198.8		49198.8	Bmp7	72.4035	76.4067	61.6947	57.9141		47.0574		Bmp7	0.530747	0.455805	0.366421	0.446282		0.595119		P23359	Bmp7	1	4	47.0574	67.1047	0.511994	1.0126	1.19887
P36895	Bmpr1a	Bone morphogenetic protein receptor type-1A	BMR1A_MOUSE	60063.3	1	1	0	0	1	0	0	352813	363763	NaN	NaN	134105	NaN	NaN	P36895	Bmpr1a	60063.3		60063.3	Bmpr1a	310.983	344.309			89.0747			Bmpr1a	2.27963	2.05398			1.19425			P36895	Bmpr1a	1	2	89.0747	327.646	1.87905	1.36584	1.51538
Q6PGF5;Q6ZQH0	Bms1	Q6BMS1 homolog, ribosome assembly protein (Yeast);Q6MKIAA0187 protein (Fragment)	Q6PGF5_MOU;Q6ZQH0_MOU	145413.79;145730.11	43	43	42	41	24	28	31	38108096	43962200	40792384	30306732	7490742	8.26574e+06	10885992	Q6PGF5	Bms1	145414		145414	Bms1	13874.4	17187.5	17355.3	11619.1	2055.13	2359.89	2760.93	Bms1	101.705	102.532	103.078	89.5359	27.5536	29.8447	31.7016	Q6PGF5	Bms1	3	4	2391.98	15009.1	2.64956	4.42218	3.49876	up
Q8BXK4	Bmt2	S-adenosylmethionine sensor upstream of mTORC1	SAMTR_MOUSE	45952.5	3	2	3	3	0	1	0	675657	408149	655902	544356	NaN	209234	NaN	Q8BXK4	Bmt2	45952.5		45952.5	Bmt2	778.43	504.951	883.056	660.408		189.033		Bmt2	5.7062	3.01229	5.2447	5.08906		2.39064		Q8BXK4	Bmt2	1	4	189.033	706.711	1.90248	1.76632	1.86117
Q6QD59	Bnip1	Vesicle transport protein SEC20	SEC20_MOUSE	26175.3	10	10	9	10	10	11	11	13628860	16278943	11854499	12766281	6865226	8736678	9925970	Q6QD59	Bnip1	26175.3		26175.3	Bnip1	27565.8	35356.9	28018.9	27190.2	10463.6	13857	13985.4	Bnip1	202.068	210.922	166.412	209.526	140.289	175.245	160.583	Q6QD59	Bnip1	3	4	12768.7	29532.9	1.20971	3.24274	2.97027
O54940	Bnip2	BCL2/adenovirus E1B 19 kDa protein-interacting protein 2	BNIP2_MOUSE	37768.8	5	2	5	5	5	5	5	1.63692e+06	1590156	2.21016e+06	1.6022e+06	1.15168e+06	909628	1.3213e+06	O54940	Bnip2	37768.8		37768.8	Bnip2	2294.55	2393.57	3620.33	2364.95	1216.51	999.876	1290.22	Bnip2	16.82	14.2789	21.5021	18.2241	16.3101	12.6451	14.8145	O54940	Bnip2	3	4	1168.87	2668.35	1.19083	2.62178	2.54298
Q9Z2F7	Bnip3l	BCL2/adenovirus E1B 19 kDa protein-interacting protein 3-like	BNI3L_MOUSE	23766.3	1	0	2	2	2	2	1	178973	NaN	158163	126410	173760	230009	317084	Q9Z2F7	Bnip3l	23766.3		23766.3	Bnip3l	398.683		411.719	296.523	291.68	401.79	492.048	Bnip3l	2.92251		2.44531	2.28499	3.91063	5.0813	5.64978	Q9Z2F7	Bnip3l	3	3	395.172	368.975	-0.0989585	0.110809	0.391844
Q5SQY2	Bod1	Biorientation of chromosomes in cell division protein 1	BOD1_MOUSE	18363.6	1	0	0	1	0	1	0	88947.2	NaN	NaN	70229.6	NaN	50381	NaN	Q5SQY2	Bod1	18363.6		18363.6	Bod1	256.435			213.207		113.9		Bod1	1.87977			1.64296		1.44046		Q5SQY2	Bod1	1	2	113.9	234.821	1.04379	0.856213	1.05967
E9Q6J5;E9Q6J5-3	Bod1l	BD1Biorientation of chromosomes in cell division protein 1-like 1;BD1Isoform 3 of Biorientation of chromosomes in cell division protein 1-like 1	BD1L1_MO	327452.94;327452.94-3	62	62	64	67	63	70	62	20044174	25217788	22493896	21986932	15215764	16616031	16006013	E9Q6J5	Bod1l	327453		327453	Bod1l	3240.72	4378.22	4249.85	3743.3	1853.8	2106.66	1802.72	Bod1l	23.7558	26.1183	25.241	28.8456	24.8544	26.6422	20.6992	E9Q6J5	Bod1l	3	4	1921.06	3903.02	1.02269	3.24848	2.97256
O35425;O35425-2	Bok	Bcl-2-related ovarian killer protein;Isoform 2 of Bcl-2-related ovarian killer protein	BOK_MOUSE	23456.31;23456.31-2	1	0	0	1	1	0	0	4223576	NaN	NaN	4575242	5409520	NaN	NaN	O35425	Bok	23456.3		23456.3	Bok	9532.85			10874.1	9200.64			Bok	69.8796			83.795	123.355			O35425	Bok	1	2	9200.64	10203.5	0.149254	0.269584	0.531722
Q9D8S9	Bola1	BolA-like protein 1	BOLA1_MOUSE	14379.4	7	7	7	7	7	8	8	6579905	8782292	7882364	7.03878e+06	5915730	7.3449e+06	8418593	Q9D8S9	Bola1	14379.4		14379.4	Bola1	24226.1	34722.3	33913.7	27289.6	16413	21206.1	21592.1	Bola1	177.587	207.136	201.423	210.292	220.053	268.187	247.924	Q9D8S9	Bola1	3	4	19737.1	30037.9	0.605876	1.66073	1.77136
Q8BGS2	Bola2	BolA-like protein 2	BOLA2_MOUSE	10214.6	7	7	7	7	7	7	7	4.56984e+06	7.24419e+06	10664026	5.84298e+06	6801366	6.05214e+06	7.12634e+06	Q8BGS2	Bola2	10214.6		10214.6	Bola2	23685.5	40318.9	64589.1	31889.8	26564.1	24598.2	25730	Bola2	173.624	240.523	383.612	245.741	356.151	311.085	295.436	Q8BGS2	Bola2	3	4	25630.8	40120.8	0.646476	0.718593	0.93641
Q8CEI1	Bola3	BolA-like protein 3	BOLA3_MOUSE	12228.2	3	2	2	3	1	1	1	1.07818e+06	1.54123e+06	1.27282e+06	994437	326066	513692	780825	Q8CEI1	Bola3	12228.2		12228.2	Bola3	4667.96	7165.42	6439.62	4533.68	1063.8	1744.03	2354.96	Bola3	34.218	42.7454	38.2467	34.9363	14.2626	22.0561	27.0401	Q8CEI1	Bola3	3	4	1720.93	5701.67	1.7282	2.4583	2.41934
P97452	Bop1	Ribosome biogenesis protein BOP1	BOP1_MOUSE	82545.6	36	35	36	35	30	31	31	81221040	89364384	83154808	68823080	19104992	20894388	25333986	P97452	Bop1	82545.6		82545.6	Bop1	52092.7	61547.5	62323.5	46481.4	9233.63	10508.8	11318.9	Bop1	381.86	367.162	370.156	358.182	123.797	132.901	129.966	P97452	Bop1	3	4	10353.8	55611.3	2.42522	4.92519	3.54164	up
Q8BS90;Q8BS90-2	Bora	Protein aurora borealis;Isoform 2 of Protein aurora borealis	BORA_MOUSE	57037.66;57037.66-2	1	2	0	0	0	0	0	54510.7	232745	NaN	NaN	NaN	NaN	NaN	Q8BS90	Bora	57037.7		57037.7	Bora	50.5967	231.984						Bora	0.370894	1.3839						Q8BS90	Bora		2		141.29
Q9D920	Borcs5	BLOC-1-related complex subunit 5	BORC5_MOUSE	22120.3	10	8	8	9	10	10	10	6.56767e+06	6851179	5.09525e+06	4958709	4.61231e+06	5.3925e+06	6.39313e+06	Q9D920	Borcs5	22120.3		22120.3	Borcs5	15718.9	17608.1	14250.6	12497.3	8318.52	10120.8	10659	Borcs5	115.226	105.042	84.6381	96.3033	111.529	127.994	122.388	Q9D920	Borcs5	3	4	9699.43	15018.7	0.63079	2.01621	2.06878
Q9D6W8	Borcs6	BLOC-1-related complex subunit 6	BORC6_MOUSE	38011.2	10	10	12	11	13	13	13	2972656	3.95227e+06	3.83008e+06	3301645	7.0282e+06	6918296	8136646	Q9D6W8	Borcs6	38011.2		38011.2	Borcs6	4140.33	5911.19	6233.83	4842.36	7376.53	7556.19	7894.55	Borcs6	30.3503	35.2633	37.0244	37.3149	98.8989	95.5606	90.6467	Q9D6W8	Borcs6	3	4	7609.09	5281.93	-0.526659	1.69402	1.79951
Q9CRC6	Borcs7	BLOC-1-related complex subunit 7	BORC7_MOUSE	11546.1	1	0	1	0	0	0	0	95806.9	NaN	88309.5	NaN	NaN	NaN	NaN	Q9CRC6	Borcs7	11546.1		11546.1	Borcs7	439.302		473.184					Borcs7	3.22026		2.81036					Q9CRC6	Borcs7		2		456.243
P15327	Bpgm	Bisphosphoglycerate mutase	PMGE_MOUSE	29978.2	0	0	0	0	1	1	1	NaN	NaN	NaN	NaN	106023	107350	102970	P15327	Bpgm	29978.2		29978.2	Bpgm					141.096	148.666	126.677	Bpgm					1.8917	1.88013	1.45453	P15327	Bpgm	3		138.813					down-a
Q8R164	Bphl	Valacyclovir hydrolase	BPHL_MOUSE	32850.9	11	12	12	11	13	14	14	8469560	7489082	6.08113e+06	5.64383e+06	8544114	10046474	12804280	Q8R164	Bphl	32850.9		32850.9	Bphl	13649.5	12960.5	11452.4	9577.78	10376.2	12696.4	14374.8	Bphl	100.056	77.3159	68.0187	73.8058	139.116	160.567	165.054	Q8R164	Bphl	3	4	12482.5	11910	-0.0677282	0.144959	0.421447
P07743	Bpifa2	BPI fold-containing family A member 2	BPIA2_MOUSE	24752.9	5	3	6	5	5	7	0	2846915	1.3626e+06	4.49875e+06	2653422	890791	8694228	NaN	P07743	Bpifa2	24752.9		24752.9	Bpifa2	6089.07	3129.55	11244.1	5976.12	1435.72	14582.1		Bpifa2	44.6353	18.6694	66.7817	46.0516	19.249	184.415		P07743	Bpifa2	2	4	8008.92	6609.71	-0.27702	0.120598	0.40049
Q9Z0S1	Bpnt1	3'(2'),5'-bisphosphate nucleotidase 1	BPNT1_MOUSE	33196	17	17	17	17	17	18	17	23928834	27849710	27678144	21992466	30612476	27911540	38129508	Q9Z0S1	Bpnt1	33196		33196	Bpnt1	38162.6	47695.1	51583.3	36934	36790.1	34907	42361.3	Bpnt1	279.747	284.526	306.367	284.611	493.255	441.458	486.4	Q9Z0S1	Bpnt1	3	4	38019.5	43593.8	0.197383	0.545034	0.780753
Q80V26	Bpnt2	Golgi-resident adenosine 3',5'-bisphosphate 3'-phosphatase	IMPA3_MOUSE	38616.3	5	6	6	6	3	4	3	1.61117e+06	1.83576e+06	1.51729e+06	1.14319e+06	430222	592080	650333	Q80V26	Bpnt2	38616.3		38616.3	Bpnt2	2208.89	2702.61	2430.83	1650.39	444.468	636.539	621.095	Bpnt2	16.192	16.1225	14.4374	12.7178	5.95909	8.05009	7.13153	Q80V26	Bpnt2	3	4	567.367	2248.18	1.9864	3.4709	3.10743
A0A140LHY5	Bptf	A0A140Bromodomain PHD finger transcription factor (Fragment)	A0A140LHY5	37623	1	1	1	1	1	1	1	111528	228477	180454	172965	183394	95037.4	205950	A0A140LHY5	Bptf	37623		37623	Bptf	156.94	345.247	296.738	256.297	194.469	104.871	201.884	Bptf	1.15043	2.05957	1.7624	1.97501	2.6073	1.32627	2.31807	A0A140LHY5	Bptf	3	4	167.075	263.805	0.658978	0.825108	1.03207
E9Q6A7	Bptf	E9Q6Bromodomain PHD finger transcription factor	E9Q6A7_M	321598	72	72	68	65	65	68	64	36717036	45111436	36699224	32296032	25879510	27957094	34663788	E9Q6A7	Bptf	321598		321598	Bptf	6044.45	7974.67	7059.96	5598.54	3210.42	3609.06	3975.18	Bptf	44.3082	47.573	41.931	43.142	43.0429	45.6426	45.6437	E9Q6A7	Bptf	3	4	3598.22	6669.4	0.890275	2.64038	2.55623
P28028	Braf	Serine/threonine-protein kinase B-raf	BRAF_MOUSE	82514.5	10	10	10	10	10	10	9	9303168	11010419	9587568	7.80617e+06	6247810	7.20321e+06	7.82849e+06	P28028	Braf	82514.5		82514.5	Braf	5969.01	7586	7188.47	5274.07	3020.76	3624.19	3498.98	Braf	43.7552	45.2544	42.6942	40.6416	40.5001	45.8339	40.1759	P28028	Braf	3	4	3381.31	6504.39	0.943831	2.69914	2.59926
Q99MP8-2	Brap	Isoform 2 of BRCA1-associated protein	BRAP_MOUSE	63950.7	18	19	17	16	16	20	17	4733105	5.68927e+06	5195434	4359469	2520407	3.5073e+06	4.27258e+06	Q99MP8	Brap	63950.7		63950.7	Brap	3918.35	5057.67	5026.15	3800.38	1572.33	2276.9	2463.99	Brap	28.7231	30.1716	29.8516	29.2855	21.0807	28.7951	28.292	Q99MP8	Brap	3	4	2104.41	4450.64	1.0806	2.43606	2.40224
Q8C3R1	Brat1	BRCA1-associated ATM activator 1	BRAT1_MOUSE	89085.6	19	24	23	21	19	21	20	6981925	11027655	9831571	7416205	5548302	5154299	7.89622e+06	Q8C3R1	Brat1	89085.6		89085.6	Brat1	4149.25	7037.44	6827.69	4641.01	2484.69	2402.02	3268.93	Brat1	30.4157	41.982	40.5515	35.7633	33.3128	30.3776	37.5344	Q8C3R1	Brat1	3	4	2718.55	5663.85	1.05895	1.99469	2.05263
P48754	Brca1	Breast cancer type 1 susceptibility protein homolog	BRCA1_MOUSE	198795	4	7	7	5	0	0	0	525763	1.18698e+06	1.1689e+06	707897	NaN	NaN	NaN	P48754	Brca1	198795		198795	Brca1	140.019	339.45	363.773	198.52				Brca1	1.0264	2.025	2.16054	1.52978				P48754	Brca1		4		260.44				up-a
P46737	Brcc3	Lys-63-specific deubiquitinase BRCC36	BRCC3_MOUSE	33340.1	15	15	16	14	12	12	12	14459552	19236578	18147584	14606974	11666628	11543227	14696830	P46737	Brcc3	33340.1		33340.1	Brcc3	22961	32802	33675.3	24424.9	13960.4	14374	16257.4	Brcc3	168.313	195.681	200.006	188.217	187.171	181.783	186.67	P46737	Brcc3	3	4	14863.9	28465.8	0.937415	2.4499	2.41269
G5E8P1-2	Brd1	Isoform 2 of Bromodomain-containing protein 1	BRD1_MOUSE	133373	26	20	23	25	25	26	26	5990095	5112422	5906158	4.65019e+06	4076439	4.47237e+06	5991125	G5E8P1	Brd1	133373		133373	Brd1	2377.77	2179.21	2739.66	1943.76	1219.36	1392.15	1656.67	Brd1	17.43	13.0001	16.2716	14.9785	16.3483	17.6061	19.0222	G5E8P1	Brd1	3	4	1422.73	2310.1	0.699296	2.10284	2.13943
Q7JJ13	Brd2	Bromodomain-containing protein 2	BRD2_MOUSE	88066.9	26	26	26	25	28	28	27	20072584	22422528	20283498	16257357	16072783	17058642	21850930	Q7JJ13	Brd2	88066.9		88066.9	Brd2	12066.8	14474.8	14249.1	10291.4	7281.11	8041.69	9150.63	Brd2	88.4546	86.3494	84.6294	79.3051	97.6196	101.701	105.069	Q7JJ13	Brd2	3	4	8157.81	12770.5	0.646566	2.00109	2.058
Q8K2F0	Brd3	Bromodomain-containing protein 3	BRD3_MOUSE	79761.7	14	15	14	14	18	17	18	7497652	8953588	7320424	6537457	7125695	8084227	11914999	Q8K2F0	Brd3	79761.7		79761.7	Brd3	4976.61	6381.79	5678.06	4569.34	3564.12	4207.84	5509.26	Brd3	36.4805	38.0706	33.7235	35.211	47.785	53.2152	63.2584	Q8K2F0	Brd3	3	4	4427.07	5401.45	0.286993	0.717697	0.935659
Q9ESU6	Brd4	Bromodomain-containing protein 4	BRD4_MOUSE	155895	36	37	34	35	39	40	38	37246548	48085892	42497824	38436064	41835384	45214708	53333644	Q9ESU6	Brd4	155895		155895	Brd4	12649	17535.8	16865.2	13745	10706.1	12041	12617.2	Brd4	92.7221	104.61	100.167	105.918	143.539	152.278	144.873	Q9ESU6	Brd4	3	4	11788.1	15198.8	0.366623	1.22356	1.389
O88665	Brd7	Bromodomain-containing protein 7	BRD7_MOUSE	73999.9	16	15	20	15	17	15	15	6.40985e+06	5.92003e+06	8.2435e+06	5825682	4626886	4.90659e+06	3745728	O88665	Brd7	73999.9		73999.9	Brd7	4585.84	4548.12	6891.9	4388.88	2494.46	2752.73	1866.8	Brd7	33.616	27.1319	40.9328	33.8205	33.4439	34.8129	21.435	O88665	Brd7	3	4	2371.33	5103.69	1.10584	2.30194	2.29653
Q8R3B7	Brd8	Bromodomain-containing protein 8	BRD8_MOUSE	102610	23	22	23	22	23	26	21	10302299	11352049	10329474	8.2703e+06	5894201	6.20275e+06	6111698	Q8R3B7	Brd8	102610		102610	Brd8	5315.53	6289.61	6227.97	4493.35	2291.68	2509.63	2196.67	Brd8	38.9649	37.5208	36.9896	34.6254	30.7251	31.7384	25.2226	Q8R3B7	Brd8	3	4	2332.66	5581.61	1.25871	3.47992	3.11287
Q3UQU0	Brd9	Bromodomain-containing protein 9	BRD9_MOUSE	66840.2	17	19	17	18	25	25	23	5030304	7122598	4.82089e+06	4.51789e+06	10042011	8983094	8967528	Q3UQU0	Brd9	66840.2		66840.2	Brd9	3984.36	6058.15	4462.18	3768.22	5993.79	5579.6	4947.99	Brd9	29.2069	36.14	26.5021	29.0376	80.3603	70.5633	56.8137	Q3UQU0	Brd9	3	4	5507.13	4568.23	-0.269666	0.715256	0.93358
Q8CFK2	Brf1	Transcription factor IIIB 90 kDa subunit	TF3B_MOUSE	73799.1	6	6	7	5	5	7	6	1.10405e+06	2.41874e+06	2.25037e+06	1478680	840509	1.00438e+06	957686	Q8CFK2	Brf1	73799.1		73799.1	Brf1	792.025	1863.28	1886.52	1117.02	454.371	565.02	478.592	Brf1	5.80586	11.1154	11.2045	8.6077	6.09186	7.14562	5.49529	Q8CFK2	Brf1	3	4	499.328	1414.71	1.50245	1.91673	1.98807
Q3UAW9	Brf2	Transcription factor IIIB 50 kDa subunit	BRF2_MOUSE	47050	1	1	0	0	0	0	0	86478.3	100936	NaN	NaN	NaN	NaN	NaN	Q3UAW9	Brf2	47050		47050	Brf2	97.3084	121.962						Brf2	0.713309	0.727566						Q3UAW9	Brf2		2		109.635
Q8BXV2	Bri3bp	BRI3-binding protein	BRI3B_MOUSE	28263.1	4	4	4	4	6	6	6	22052008	22021010	19827096	17710192	16291060	17504518	18500476	Q8BXV2	Bri3bp	28263.1		28263.1	Bri3bp	41307.6	44295.2	43400.8	34933.5	22995.8	25712.6	24141.1	Bri3bp	302.801	264.244	257.769	269.195	308.31	325.178	277.192	Q8BXV2	Bri3bp	3	4	24283.1	40984.3	0.755115	3.1799	2.9326
Q5SXJ3	Brip1	Fanconi anemia group J protein homolog	FANCJ_MOUSE	131360	0	3	4	4	0	0	0	NaN	278252	561382	391783	NaN	NaN	NaN	Q5SXJ3	Brip1	131360		131360	Brip1		120.424	264.394	166.272				Brip1		0.718392	1.57031	1.28128				Q5SXJ3	Brip1		3		183.697
Q9DCA5	Brix1	Ribosome biogenesis protein BRX1 homolog	BRX1_MOUSE	41241.1	18	19	18	17	19	19	18	60372920	74183336	59623940	41053640	20263938	22702416	32291526	Q9DCA5	Brix1	41241.1		41241.1	Brix1	77502.2	102262	89443.4	55495.7	19602.5	22853.7	28877	Brix1	568.122	610.047	531.229	427.647	262.816	289.023	331.571	Q9DCA5	Brix1	3	4	23777.7	81175.9	1.77144	2.94753	2.7752
Q99N20	Brms1	Breast cancer metastasis-suppressor 1 homolog	BRMS1_MOUSE	28210.5	6	6	6	6	6	6	6	2389130	3.18666e+06	2.74492e+06	2437279	2.17642e+06	2.24927e+06	2679935	Q99N20	Brms1	28210.5		28210.5	Brms1	4483.65	6421.93	6019.75	4816.52	3077.88	3310.15	3503.55	Brms1	32.8669	38.3101	35.7529	37.1158	41.2659	41.8623	40.2284	Q99N20	Brms1	3	4	3297.19	5435.46	0.721165	2.22862	2.23809
Q3U1T3	Brms1l	Breast cancer metastasis-suppressor 1-like protein	BRM1L_MOUSE	37657.1	9	7	8	8	7	8	8	2289286	1680668	1.94903e+06	1.80502e+06	2.5864e+06	2440763	2.93897e+06	Q3U1T3	Brms1l	37657.1		37657.1	Brms1l	3218.52	2537.32	3202.06	2672.23	2740.11	2690.88	2878.34	Brms1l	23.593	15.1364	19.0179	20.592	36.7373	34.0307	33.0496	Q3U1T3	Brms1l	3	4	2769.78	2907.53	0.0700247	0.231913	0.498801
Q8K2Q7	Brox	BRO1 domain-containing protein BROX	BROX_MOUSE	46201.8	9	9	10	10	12	11	12	8.16654e+06	10078678	8817420	7.75464e+06	5053375	6490332	8420532	Q8K2Q7	Brox	46201.8		46201.8	Brox	9357.96	12401.8	11807	9357.1	4363.57	5832.08	6721.63	Brox	68.5976	73.983	70.1252	72.1052	58.5034	73.7563	77.179	Q8K2Q7	Brox	3	4	5639.09	10731	0.928246	2.2728	2.27364
B2RRD7	Brpf1	Peregrin	BRPF1_MOUSE	137310	17	23	18	18	21	18	18	7308950	11637438	7.53058e+06	5.0411e+06	6.45711e+06	4.81482e+06	5386791	B2RRD7	Brpf1	137310		137310	Brpf1	2818.1	4818.32	3393.02	2046.74	1876.1	1455.78	1446.85	Brpf1	20.6578	28.7438	20.152	15.772	25.1534	18.4107	16.613	B2RRD7	Brpf1	3	4	1592.91	3269.04	1.03721	1.53979	1.66751
B2KF05	Brpf3	Bromodomain and PHD finger-containing protein 3	BRPF3_MOUSE	135294	4	5	6	3	3	3	4	1.55611e+06	1.66065e+06	1.57416e+06	552911	664410	869482	837525	B2KF05	Brpf3	135294		135294	Brpf3	608.924	697.811	719.828	227.833	195.919	266.807	228.304	Brpf3	4.46366	4.1628	4.27525	1.75566	2.62674	3.37422	2.62143	B2KF05	Brpf3	3	4	230.343	563.599	1.29088	1.23153	1.39599
Q69Z98;Q69Z98-2;Q69Z98-3;Q69Z98-4	Brsk2	Serine/threonine-protein kinase BRSK2;Isoform 2 of Serine/threonine-protein kinase BRSK2;Isoform 3 of Serine/threonine-protein kinase BRSK2;Isoform 4 of Serine/threonine-protein kinase BRSK2	BRSK2_MOUSE	81733.47;81733.47-2;81733.47-3;81733.47-4	0	1	1	1	0	0	0	NaN	644463	732872	485158	NaN	NaN	NaN	Q69Z98	Brsk2	81733.5		81733.5	Brsk2		448.268	554.736	330.919				Brsk2		2.67415	3.29473	2.55004				Q69Z98	Brsk2		3		444.641
Q921C3;Q921C3-2	Brwd1	Bromodomain and WD repeat-containing protein 1;Isoform B of Bromodomain and WD repeat-containing protein 1	BRWD1_MOUSE	259228.1;259228.1-2	5	10	6	7	16	17	16	1.77522e+06	2.97274e+06	1433624	1.71476e+06	2.65314e+06	2.73374e+06	3.81046e+06	Q921C3	Brwd1	259228		259228	Brwd1	362.555	651.951	342.146	368.773	408.316	437.814	542.111	Brwd1	2.65767	3.88922	2.0321	2.84174	5.4744	5.53689	6.22462	Q921C3	Brwd1	3	4	462.747	431.356	-0.101345	0.204202	0.473927
A2AHJ4	Brwd3	Bromodomain and WD repeat-containing protein 3	BRWD3_MOUSE	202942	9	7	8	7	6	7	8	7.25002e+06	8308837	6653071	5310407	1.86581e+06	2.08965e+06	2.59639e+06	A2AHJ4	Brwd3	202942		202942	Brwd3	1891.34	2327.6	2028.19	1458.8	366.788	427.482	471.837	Brwd3	13.8643	13.8853	12.046	11.2414	4.91762	5.40623	5.41773	A2AHJ4	Brwd3	3	4	422.036	1926.48	2.19053	4.06118	3.39531
Q9Z2E9	Bscl2	Seipin	BSCL2_MOUSE	43104.8	0	1	2	0	2	2	2	NaN	309568	941645	NaN	374582	286751	479001	Q9Z2E9	Bscl2	43104.8		43104.8	Bscl2		408.29	1351.51		346.689	276.182	409.83	Bscl2		2.43566	8.02698		4.64815	3.49278	4.70575	Q9Z2E9	Bscl2	3	2	344.234	879.901	1.35395	0.710782	0.929902
Q80Y55	Bsdc1	BSD domain-containing protein 1	BSDC1_MOUSE	46952.7	8	13	8	10	10	12	11	2.42712e+06	5192518	2756987	4.04128e+06	1.47271e+06	1.98971e+06	2.18232e+06	Q80Y55	Bsdc1	46952.7		46952.7	Bsdc1	2736.74	6287.2	3632.73	4798.41	1251.34	1759.32	1714.16	Bsdc1	20.0614	37.5064	21.5757	36.9762	16.7771	22.2495	19.6823	Q80Y55	Bsdc1	3	4	1574.94	4363.77	1.47028	2.09606	2.13396
P18572;P18572-2	Bsg	Basigin;Isoform 2 of Basigin	BASI_MOUSE	42444.69;42444.69-2	10	10	10	10	8	9	9	18930104	21538018	23606562	16142035	2872087	2.94603e+06	2.87566e+06	P18572	Bsg	42444.7		42444.7	Bsg	23612	28848.4	34408.7	21201.8	2699.56	2881.57	2498.66	Bsg	173.085	172.096	204.362	163.38	36.1937	36.4423	28.6901	P18572	Bsg	3	4	2693.27	27017.7	3.32648	4.93828	3.54164	up
Q8R2Q8	Bst2	Bone marrow stromal antigen 2	BST2_MOUSE	19152.1	6	6	5	5	5	2	4	7815313	9737540	8.01523e+06	6340071	720947	234277	1.34754e+06	Q8R2Q8	Bst2	19152.1		19152.1	Bst2	21603.9	28905	25891.6	18455.1	1501.78	507.842	2594.9	Bst2	158.365	172.433	153.777	142.214	20.1348	6.4225	29.7951	Q8R2Q8	Bst2	3	4	1534.84	23713.9	3.94957	3.03746	2.84004	up
E9QAE3	Btaf1	E9B-TFIID TATA-box binding protein associated factor 1	E9QAE3_MOU	207052	59	61	62	59	52	50	52	33743752	42979336	39915664	30460034	14523545	15724428	17252186	E9QAE3	Btaf1	207052		207052	Btaf1	8628.13	11801	11926.8	8201.44	2798.42	3152.91	3072.98	Btaf1	63.2476	70.3993	70.8363	63.1998	37.5191	39.8738	35.2845	E9QAE3	Btaf1	3	4	3008.1	10139.3	1.75304	3.73662	3.2519
P58544	Btbd1	BTB/POZ domain-containing protein 1	BTBD1_MOUSE	53232.9	3	3	4	4	0	2	1	499603	489517	507576	399818	NaN	159126	94715.5	P58544	Btbd1	53232.9		53232.9	Btbd1	496.875	522.79	589.901	418.717		124.101	65.6197	Btbd1	3.64229	3.11871	3.50358	3.22661		1.56947	0.753458	P58544	Btbd1	2	4	94.8605	507.071	2.41831	2.8214	2.68849	up
E9PY28	Btbd2	E9BTB (POZ) domain containing 2	E9PY28_MOU	54860.3	1	1	0	1	1	0	1	220604	270018	NaN	291464	167728	NaN	139217	E9PY28	Btbd2	54860.3		54860.3	Btbd2	212.891	279.817		296.186	121.974		93.5899	Btbd2	1.56057	1.66925		2.28239	1.63533		1.07462	E9PY28	Btbd2	2	3	107.782	262.965	1.28675	1.90803	1.98059
Q8C726	Btbd9	BTB/POZ domain-containing protein 9	BTBD9_MOUSE	69147.5	6	7	7	8	0	5	4	1.10884e+06	1002829	1232004	1.15752e+06	NaN	497323	471879	Q8C726	Btbd9	69147.5		69147.5	Btbd9	848.975	824.498	1102.28	933.237		298.591	251.679	Btbd9	6.22332	4.91855	6.54676	7.19146		3.77618	2.88983	Q8C726	Btbd9	2	4	275.135	927.249	1.75282	3.39549	3.0635
Q8CIF4	Btd	Biotinidase	BTD_MOUSE	58154.3	2	2	2	2	5	6	5	467392	1.73073e+06	1.66681e+06	1.13292e+06	1355062	1224818	1.34831e+06	Q8CIF4	Btd	58154.3		58154.3	Btd	425.502	1691.95	1773.22	1086.06	929.6	874.389	855.068	Btd	3.1191	10.0934	10.5316	8.36913	12.4634	11.0581	9.81805	Q8CIF4	Btd	3	4	886.352	1244.18	0.489248	0.20279	0.472709
Q64152-2	Btf3	Isoform 2 of Transcription factor BTF3	BTF3_MOUSE	17699	12	12	13	12	15	15	15	117987760	126145480	124936728	106008536	46843836	44565304	73288000	Q64152	Btf3	17699		17699	Btf3	352931	405192	436716	333910	105590	104535	152713	Btf3	2587.12	2417.18	2593.77	2573.09	1415.67	1322.02	1753.48	Q64152	Btf3	3	4	120946	382187	1.65992	3.57561	3.16493
Q9CQH7	Btf3l4	BT3Transcription factor BTF3 homolog 4	BT3L4_MO	17270.5	9	9	12	11	11	10	10	21503854	27760256	25613254	19661300	12691356	15318011	18331984	Q9CQH7	Btf3l4	17270.5		17270.5	Btf3l4	65919.3	91381.3	91752.4	63466.6	29317.1	36822.4	39146.9	Btf3l4	483.215	545.136	544.942	489.069	393.062	465.68	449.492	Q9CQH7	Btf3l4	3	4	35095.5	78129.9	1.15459	2.62196	2.54298
P62325	Btg1	Protein BTG1	BTG1_MOUSE	19209	2	3	2	3	4	5	4	610774	1.09315e+06	365690	669398	830568	984621	1.3265e+06	P62325	Btg1	19209		19209	Btg1	1683.37	3235.31	1177.79	1942.76	1725.01	2128.04	2546.81	Btg1	12.3397	19.3003	6.99521	14.9708	23.1276	26.9126	29.2429	P62325	Btg1	3	4	2133.28	2009.81	-0.0860194	0.164899	0.438529
P35991	Btk	Tyrosine-protein kinase BTK	BTK_MOUSE	76437.5	38	38	41	36	45	49	46	124889352	89581440	79646616	80544048	96614816	105761080	112492552	P35991	Btk	76437.5		76437.5	Btk	86501.1	66627.1	64464.3	58744.3	50426.2	57442.7	54276.4	Btk	634.087	397.465	382.871	452.68	676.077	726.458	623.212	P35991	Btk	3	4	54048.4	69084.2	0.354103	1.15198	1.32415
Q7TSA3;Q7TSA3-3	Btla	B- and T-lymphocyte attenuator;Isoform 3 of B- and T-lymphocyte attenuator	BTLA_MOUSE	34337.1;34337.1-3	5	5	5	5	6	6	6	11042727	9850779	9150167	8999450	13826433	14386909	15727266	Q7TSA3	Btla	34337.1		34337.1	Btla	17026.1	16309.7	16486.3	14611.4	16064.4	17394.8	16892.1	Btla	124.808	97.2958	97.9167	112.594	215.38	219.986	193.958	Q7TSA3	Btla	3	4	16783.8	16108.4	-0.0592561	0.419396	0.66649
Q3ULA2;Q3ULA2-2	Btrc	F-box/WD repeat-containing protein 1A;Isoform 2 of F-box/WD repeat-containing protein 1A	FBW1A_MOUSE	68922.87;68922.87-2	9	9	10	7	7	6	7	3.65497e+06	4385510	4388476	2.97022e+06	2352196	1.99124e+06	2.68762e+06	Q3ULA2	Btrc	68922.9		68922.9	Btrc	2807.52	3617.4	3939.21	2402.5	1361.54	1199.43	1438.13	Btrc	20.5802	21.5796	23.396	18.5135	18.2545	15.1688	16.5129	Q3ULA2	Btrc	3	4	1333.03	3191.66	1.25959	2.74398	2.63159
O08901	Bub1	Mitotic checkpoint serine/threonine-protein kinase BUB1	BUB1_MOUSE	119563	0	1	2	0	0	0	0	NaN	135149	192141	NaN	NaN	NaN	NaN	O08901	Bub1	119563		119563	Bub1		64.2622	99.4222					Bub1		0.383357	0.590495					O08901	Bub1		2		81.8422
Q9Z1S0	Bub1b	Mitotic checkpoint serine/threonine-protein kinase BUB1 beta	BUB1B_MOUSE	118392	4	10	12	4	0	0	0	864331	3.53063e+06	3.23563e+06	871633	NaN	NaN	NaN	Q9Z1S0	Bub1b	118392		118392	Bub1b	386.508	1695.38	1690.81	410.438				Bub1b	2.83326	10.1138	10.0421	3.16281				Q9Z1S0	Bub1b		4		1045.78				up-a
Q9WVA3	Bub3	Mitotic checkpoint protein BUB3	BUB3_MOUSE	36954.5	15	17	16	17	19	18	19	113424696	148813456	129779072	103841144	102596504	106068112	130061912	Q9WVA3	Bub3	36954.5		36954.5	Bub3	162496	228936	217268	156654	110760	119161	129800	Bub3	1191.16	1365.72	1290.41	1207.16	1484.99	1506.98	1490.39	Q9WVA3	Bub3	3	4	119907	191338	0.674209	1.87282	1.95111
Q8R149	Bud13	BUD13 homolog	BUD13_MOUSE	72138.8	12	11	11	11	12	12	11	6.61288e+06	5.5271e+06	8719276	4863760	2.39954e+06	2.46093e+06	2.75558e+06	Q8R149	Bud13	72138.8		72138.8	Bud13	4853.15	4355.8	7477.73	3758.73	1327.02	1416.27	1408.76	Bud13	35.5755	25.9846	44.4122	28.9645	17.7917	17.9111	16.1757	Q8R149	Bud13	3	4	1384.02	5111.35	1.88484	3.10287	2.88328
Q9CY21	Bud23	Probable 18S rRNA (guanine-N(7))-methyltransferase	BUD23_MOUSE	31586.8	9	9	9	9	12	11	12	18826052	21354094	18774002	16301827	12432898	11359485	16089794	Q9CY21	Bud23	31586.8		31586.8	Bud23	31554.1	38433.9	36771.3	28771.9	15703.1	14930.3	18786.2	Bud23	231.304	229.278	218.395	221.714	210.535	188.818	215.706	Q9CY21	Bud23	3	4	16473.2	33882.8	1.04043	3.12055	2.8939
Q6PGH1	Bud31	Protein BUD31 homolog	BUD31_MOUSE	16999.7	13	11	12	12	14	15	15	38255852	48968944	45522600	41256072	41255060	34639788	52560728	Q6PGH1	Bud31	16999.7		16999.7	Bud31	119140	163764	165670	135296	96817.5	84595.7	114028	Bud31	873.344	976.935	983.957	1042.58	1298.06	1069.85	1309.29	Q6PGH1	Bud31	3	4	98480.5	145967	0.567735	1.66876	1.77805
O54825	Bysl	Bystin	BYST_MOUSE	49783.5	24	23	23	22	23	23	23	52908128	70439344	57693364	43682596	14068121	15526422	18115238	O54825	Bysl	49783.5		49783.5	Bysl	56265.1	80439.5	71696.6	48917.2	11273.8	12948	13420	Bysl	412.445	479.863	425.825	376.952	151.15	163.748	154.091	O54825	Bysl	3	4	12547.2	64329.6	2.35811	4.05715	3.39468	up
Q9CQC6	Bzw1	5eIF5-mimic protein 2	5MP2_MOUS	48043.2	27	25	26	26	25	26	26	208958400	251572992	224539296	139362400	69001312	67487752	87235232	Q9CQC6	Bzw1	48043.2		48043.2	Bzw1	230266	297695	289147	161716	57298.6	58318.7	66965.9	Bzw1	1687.94	1775.9	1717.32	1246.17	768.217	737.537	768.915	Q9CQC6	Bzw1	3	4	60861.1	244706	2.00746	3.29463	2.99873
Q91VK1	Bzw2	5eIF5-mimic protein 1	5MP1_MOUS	48063.2	25	28	27	27	20	24	22	36803068	52546116	50699956	33980920	7.82336e+06	8224668	11553959	Q91VK1	Bzw2	48063.2		48063.2	Bzw2	40539	62153.7	65260.9	39414.9	6493.81	7104.29	8865.67	Bzw2	297.167	370.779	387.602	303.729	87.0641	89.8456	101.797	Q91VK1	Bzw2	3	4	7487.92	51842.1	2.79149	3.92796	3.34072	up
O35473	C1d	Nuclear nucleic acid-binding protein C1D	C1D_MOUSE	15945.4	3	2	3	3	3	4	4	6514360	6.51146e+06	6086657	4990953	3.54511e+06	3.73535e+06	4712864	O35473	C1d	15945.4		15945.4	C1d	21629.1	23215.7	23615.7	17449.6	8869.77	9725.48	10900.4	C1d	158.55	138.494	140.26	134.466	118.919	122.995	125.16	O35473	C1d	3	4	9831.88	21477.5	1.12729	3.3285	3.01951
Q9JJ06	C1galt1	Glycoprotein-N-acetylgalactosamine 3-beta-galactosyltransferase 1	C1GLT_MOUSE	42304.1	7	7	7	6	7	6	7	2.89604e+06	2.4914e+06	2.34583e+06	1.98494e+06	1.55867e+06	1.37015e+06	2120117	Q9JJ06	C1galt1	42304.1		42304.1	C1galt1	3624.3	3348.12	3430.62	2615.79	1469.91	1344.63	1848.29	C1galt1	26.5675	19.9732	20.3754	20.1571	19.7074	17.005	21.2224	Q9JJ06	C1galt1	3	4	1554.28	3254.7	1.06628	2.84529	2.70467
Q9JMG2	C1galt1c1	C1GALT1-specific chaperone 1	C1GLC_MOUSE	36067.5	9	7	6	9	6	6	7	2.76935e+06	1.9848e+06	1.43227e+06	2.06466e+06	977769	961086	1.35378e+06	Q9JMG2	C1galt1c1	36067.5		36067.5	C1galt1c1	4065.03	3128.53	2456.79	3191.32	1081.53	1106.27	1384.28	C1galt1c1	29.7983	18.6633	14.5915	24.5921	14.5004	13.9906	15.8946	Q9JMG2	C1galt1c1	3	4	1190.7	3210.42	1.43095	3.0654	2.85807
O35658	C1qbp	Complement component 1 Q subcomponent-binding protein, mitochondrial	C1QBP_MOUSE	31012.9	9	9	9	9	8	8	9	95041264	124260024	101645888	79524712	20209508	27170510	30062914	O35658	C1qbp	31012.9		31012.9	C1qbp	162245	227787	202771	142955	25997.6	36372.3	35750.6	C1qbp	1189.32	1358.87	1204.31	1101.6	348.556	459.989	410.495	O35658	C1qbp	3	4	32706.8	183940	2.49157	3.99221	3.37135	up
Q9ES30	C1qtnf3	C1Complement C1q tumor necrosis factor-related protein 3	C1QT3_MOU	26828.2	0	2	0	0	2	2	1	NaN	68807.5	NaN	NaN	27919.9	42941	13950.6	Q9ES30	C1qtnf3	26828.2		26828.2	C1qtnf3		145.809			41.5186	66.4502	19.1777	C1qtnf3		0.869826			0.55665	0.840373	0.220201	Q9ES30	C1qtnf3	3	1	42.3822	145.809	1.78255	0.694708	0.915414
E9Q3C1	C2cd2	C2C2 domain-containing protein 2	C2CD2_MOU	76536.1	1	1	1	1	1	0	1	6549206	6881661	6465564	4779186	2.74611e+06	NaN	2.56222e+06	E9Q3C1	C2cd2	76536.1		76536.1	C2cd2	4530.28	5111.71	5226.35	3481.18	1431.43		1234.65	C2cd2	33.2087	30.494	31.0407	26.8257	19.1916		14.1765	E9Q3C1	C2cd2	2	4	1333.04	4587.38	1.78295	2.94662	2.77446
Q80X80	C2cd2l	C2Phospholipid transfer protein C2CD2L	C2C2L_MOU	76329.1	4	4	3	3	6	7	4	17473486	99419784	83673600	41286096	17162704	10819415	19998332	Q80X80	C2cd2l	76329.1		76329.1	C2cd2l	12119.7	74049.5	67819.8	30154.5	8970.45	5884.76	9662.67	C2cd2l	88.8421	441.743	402.8	232.368	120.269	74.4226	110.949	Q80X80	C2cd2l	3	4	8172.63	46035.9	2.49389	1.50261	1.63529
Q52KB6	C2cd3	C2C2 domain-containing protein 3	C2CD3_MOU	255346	0	3	5	0	5	6	5	NaN	379904	616956	NaN	444170	644400	777114	Q52KB6	C2cd3	255346		255346	C2cd3		84.5833	149.48		69.3969	104.771	112.241	C2cd3		0.504583	0.887803		0.930422	1.32501	1.28877	Q52KB6	C2cd3	3	2	95.4696	117.032	0.293787	0.247552	0.512429
E9Q861;Q80XU5;Q8BNT6	C2cd4a;C2cd4b;C2cd4a	E9C2 calcium-dependent domain containing 4A;Q80C2 calcium-dependent domain containing 4B;Q8C2 calcium-dependent domain-containing protein 4A (Fragment)	E9Q861_MOU;Q80XU5_MO;Q8BNT6_MOU	36738.31;37122.76;24173.11	1	1	1	1	1	1	1	4576770	5005380	4.23772e+06	4210487	1.09837e+06	1.40367e+06	1.85947e+06	E9Q861	C2cd4a	36738.3		36738.3	C2cd4a	6595.42	7745.64	7136.26	6389.28	1192.75	1586.21	1866.65	C2cd4a	48.347	46.2067	42.3842	49.2353	15.9915	20.0603	21.4333	E9Q861	C2cd4a	3	4	1548.54	6966.65	2.16956	4.24656	3.4619
Q7TPS5	C2cd5	C2C2 domain-containing protein 5	C2CD5_MOU	111664	11	11	10	10	13	14	12	6636502	8056103	6.80087e+06	5712999	4.44443e+06	4.94289e+06	5524358	Q7TPS5	C2cd5	111664		111664	C2cd5	3146.49	4101.57	3767.97	2852.25	1587.89	1837.73	1824.57	C2cd5	23.0651	24.468	22.379	21.9793	21.2892	23.2411	20.9501	Q7TPS5	C2cd5	3	4	1750.06	3467.07	0.98631	2.85681	2.71171
P01027	C3	Complement C3	CO3_MOUSE	186484	12	15	15	12	23	21	21	16127936	22597160	14251296	7869230	22458276	24849026	45744060	P01027	C3	186484		186484	C3	4578.67	6888.93	4727.93	2352.5	4804.57	5532.01	9046.64	C3	33.5635	41.096	28.0805	18.1282	64.416	69.9615	103.875	P01027	C3	3	4	6461.07	4637.01	-0.478579	0.531758	0.769057
P01029	C4b	Complement C4-B	CO4B_MOUSE	192915	6	9	8	5	14	14	14	2740138	5742322	4.23062e+06	2.52544e+06	8.07812e+06	7.16584e+06	11080622	P01029	C4b	192915		192915	C4b	751.983	1692.23	1356.74	729.807	1670.56	1542.11	2118.32	C4b	5.51233	10.095	8.05803	5.62385	22.3977	19.5026	24.3229	P01029	C4b	3	4	1777	1132.69	-0.649688	0.954659	1.1475
D3YXF5	C7	D3Complement component 7	D3YXF5_MOU	93337.5	0	0	0	0	1	1	1	NaN	NaN	NaN	NaN	95887.1	100785	179943	D3YXF5	C7	93337.5		93337.5	C7					40.9848	44.8285	71.1006	C7					0.549494	0.566932	0.81639	D3YXF5	C7	3		52.3046					down-a
Q8BH35;Q8BH35-2	C8b	Complement component C8 beta chain;Isoform 2 of Complement component C8 beta chain	CO8B_MOUSE	66229.32;66229.32-2	0	1	0	0	1	1	1	NaN	87333.3	NaN	NaN	60807.8	70004.3	98270.3	Q8BH35	C8b	66229.3		66229.3	C8b		74.9668			36.6292	43.8823	54.7225	C8b		0.447215			0.491097	0.554965	0.628334	Q8BH35	C8b	3	1	45.078	74.9668	0.733828	0.814093	1.02202
Q6DFW0;Q6DFW0-2	C9orf72	Guanine nucleotide exchange factor C9orf72 homolog;Isoform 2 of Guanine nucleotide exchange factor C9orf72 homolog	CI072_MOUSE	54277.57;54277.57-2	3	3	3	3	3	2	3	211613	228410	236915	212079	137617	91303.9	208663	Q6DFW0	C9orf72	54277.6		54277.6	C9orf72	206.407	239.24	270.041	217.829	101.151	69.8368	141.781	C9orf72	1.51305	1.42719	1.60385	1.67858	1.35616	0.883202	1.62796	Q6DFW0	C9orf72	3	4	104.256	233.379	1.16254	2.21625	2.22934
Q9D6N1	Ca13	Carbonic anhydrase 13	CAH13_MOUSE	29522.2	5	6	5	4	0	0	1	2.73331e+06	3002104	2.63e+06	1.0854e+06	NaN	NaN	42906.1	Q9D6N1	Ca13	29522.2		29522.2	Ca13	4901.65	5781.18	5511.44	2049.65			53.5999	Ca13	35.931	34.4877	32.7339	15.7944			0.615444	Q9D6N1	Ca13	1	4	53.5999	4560.98	6.41097	2.39086	2.36751	up
P00920	Ca2	Carbonic anhydrase 2	CAH2_MOUSE	29032.5	11	12	12	12	12	12	12	21302346	24480102	19732150	22449126	22820450	21274694	34904016	P00920	Ca2	29032.5		29032.5	Ca2	38845.8	47936.6	42048.2	43107.5	31358.7	30422.4	44338.8	Ca2	284.755	285.967	249.736	332.183	420.434	384.742	509.106	P00920	Ca2	3	4	35373.3	42984.5	0.281157	0.895332	1.09487
P18761	Ca6	Carbonic anhydrase 6	CAH6_MOUSE	36494.9	2	0	3	3	0	3	0	154770	NaN	325847	307527	NaN	325665	NaN	P18761	Ca6	36494.9		36494.9	Ca6	224.52		552.382	469.775		370.471		Ca6	1.64582		3.28075	3.62005		4.68522		P18761	Ca6	1	3	370.471	415.559	0.165693	0.0258606	0.318075
Q8VDY9	Caap1	Caspase activity and apoptosis inhibitor 1	CAAP1_MOUSE	37825.4	7	6	8	7	7	7	8	1.87259e+06	2.02737e+06	2.34462e+06	2.15484e+06	1.60862e+06	1.8091e+06	2.05469e+06	Q8VDY9	Caap1	37825.4		37825.4	Caap1	2620.97	3047.11	3834.83	3175.92	1696.64	1985.61	2003.35	Caap1	19.2127	18.1776	22.7761	24.4735	22.7472	25.1114	23.0028	Q8VDY9	Caap1	3	4	1895.2	3169.71	0.742	2.35913	2.34156
Q06138	Cab39	Calcium-binding protein 39	CAB39_MOUSE	39842.9	17	16	16	16	17	18	19	29301870	36292120	34203440	25008292	17908196	18556086	26514302	Q06138	Cab39	39842.9		39842.9	Cab39	38935.5	51784.6	53110	34992.2	17931.6	19335.3	24542.7	Cab39	285.413	308.921	315.435	269.647	240.414	244.527	281.804	Q06138	Cab39	3	4	20603.2	44705.6	1.11759	2.4795	2.4362
Q9DB16	Cab39l	Calcium-binding protein 39-like	CB39L_MOUSE	39105.6	15	17	15	17	20	21	21	13268958	18420522	16845756	13676241	13667156	15922697	18081032	Q9DB16	Cab39l	39105.6		39105.6	Cab39l	17963.9	26779.5	26650.8	19496.9	13943.1	16904.1	17052.1	Cab39l	131.682	159.754	158.286	150.242	186.938	213.781	195.796	Q9DB16	Cab39l	3	4	15966.4	22722.8	0.509097	1.27862	1.43797
B9EKC5;G3X8Q1	Cabin1	B9Calcineurin binding protein 1;G3X8Calcineurin binding protein 1	B9EKC5_MOU;G3X8Q1_M	243217.66;243171.58	13	15	14	12	9	14	12	2.22528e+06	2.20805e+06	2136240	1.73141e+06	768995	1.55425e+06	1.97899e+06	B9EKC5	Cabin1	243218		243218	Cabin1	484.387	516.123	543.392	396.865	126.138	265.301	300.083	Cabin1	3.55075	3.07894	3.22735	3.05822	1.69117	3.35518	3.44561	B9EKC5	Cabin1	3	4	230.508	485.192	1.07374	1.68648	1.79376
Q8K3M5	Cables2	CDK5 and ABL1 enzyme substrate 2	CABL2_MOUSE	52082.1	1	0	1	0	0	0	0	64513.6	NaN	50933.1	NaN	NaN	NaN	NaN	Q8K3M5	Cables2	52082.1		52082.1	Cables2	65.5791		60.5021					Cables2	0.480721		0.359338					Q8K3M5	Cables2		2		63.0406
Q9CS00	Cactin	Splicing factor Cactin	CATIN_MOUSE	90661.4	18	20	20	19	19	20	19	8158919	11001123	11053997	8480069	7174245	7491044	9923524	Q9CS00	Cactin	90661.4		90661.4	Cactin	4764.45	6898.49	7543.19	5214.53	3156.99	3430.32	4036.8	Cactin	34.9253	41.153	44.801	40.1828	42.3265	43.3821	46.3513	Q9CS00	Cactin	3	4	3541.37	6105.16	0.785723	1.85932	1.93981
Q8R0X2	Cacul1	CDK2-associated and cullin domain-containing protein 1	CACL1_MOUSE	42106.1	8	9	9	8	8	8	8	4.05002e+06	4.91377e+06	4666159	3995560	1.87186e+06	1.60386e+06	2.06927e+06	Q8R0X2	Cacul1	42106.1		42106.1	Cacul1	5092.3	6634.51	6856.03	5290.19	1773.57	1581.38	1812.45	Cacul1	37.3286	39.5783	40.7198	40.7658	23.7787	19.9992	20.8109	Q8R0X2	Cacul1	3	4	1722.47	5968.26	1.79283	4.2763	3.46998
Q9CXW3	Cacybp	Calcyclin-binding protein	CYBP_MOUSE	26510.2	19	19	20	21	22	19	21	187801968	224785728	210496752	162773856	47096664	53807700	67181760	Q9CXW3	Cacybp	26510.2		26510.2	Cacybp	375050	482053	491236	342302	70875.5	84264.9	93461.3	Cacybp	2749.27	2875.7	2917.58	2637.76	950.245	1065.67	1073.14	Q9CXW3	Cacybp	3	4	82867.2	422661	2.35063	4.29182	3.47794	up
B2RQC6	Cad	CAD protein	PYR1_MOUSE	243238	100	98	100	98	94	98	99	305420224	375490720	375779040	269457024	68506232	73782808	90575968	B2RQC6	Cad	243238		243238	Cad	66476.5	87762	95578.2	61758.4	11236.1	12593.3	13733.3	Cad	487.299	523.545	567.664	475.906	150.646	159.263	157.688	B2RQC6	Cad	3	4	12520.9	77893.8	2.63717	4.40288	3.49744	up
Q80TJ1;Q80TJ1-2;Q80TJ1-4	Cadps	Calcium-dependent secretion activator 1;Isoform 2 of Calcium-dependent secretion activator 1;Isoform 4 of Calcium-dependent secretion activator 1	CAPS1_MOUSE	153112.89;153112.89-2;153112.89-4	1	1	0	0	0	0	0	103344	116788	NaN	NaN	NaN	NaN	NaN	Q80TJ1	Cadps	153113		153113	Cadps	35.7334	43.3638						Cadps	0.26194	0.258687						Q80TJ1	Cadps		2		39.5486
Q8CGU1	Calcoco1	Calcium-binding and coiled-coil domain-containing protein 1	CACO1_MOUSE	77280.2	11	10	8	10	6	10	4	10625700	11787380	10263245	7535446	6.05363e+06	5837561	592126	Q8CGU1	Calcoco1	77280.2		77280.2	Calcoco1	7279.33	8671.38	8216.27	5436	3125.12	3136.02	282.579	Calcoco1	53.3604	51.7293	48.7986	41.8894	41.8992	39.6602	3.24462	Q8CGU1	Calcoco1	3	4	2181.24	7400.75	1.76252	1.21794	1.38404
Q8VEC4	Calhm2	Calcium homeostasis modulator protein 2	CAHM2_MOUSE	35823.3	9	7	8	7	11	10	9	2.33659e+06	1.86844e+06	2.03421e+06	1787888	8480083	6.14165e+06	9262363	Q8VEC4	Calhm2	35823.3		35823.3	Calhm2	3453.17	2965.19	3513.07	2782.36	9443.94	7117.61	9535.64	Calhm2	25.3131	17.6889	20.8651	21.4407	126.617	90.014	109.49	Q8VEC4	Calhm2	3	4	8699.06	3178.45	-1.45254	3.67118	3.21916	down
Q8C9E8	Calhm6	Calcium homeostasis modulator protein 6	CAHM6_MOUSE	34955.7	3	2	2	1	3	2	2	615278	658147	503475	63015.5	613667	590193	742720	Q8C9E8	Calhm6	34955.7		34955.7	Calhm6	931.871	1070.4	891.084	100.501	700.381	700.958	783.613	Calhm6	6.83098	6.38547	5.29239	0.77445	9.39018	8.86478	8.99758	Q8C9E8	Calhm6	3	4	728.317	748.463	0.0393647	0.162439	0.436451
P0DP26;P0DP27;P0DP28	Calm1;Calm2;Calm3	Calmodulin-1;Calmodulin-2;Calmodulin-3	CALM1_MOUSE;CALM2_MOUSE;CALM3_MOUSE	16837.58;16837.58;16837.58	9	9	11	10	13	11	10	13784074	13154476	14200843	11934020	25586438	21071554	27332124	P0DP26	Calm1	16837.6		16837.6	Calm1	43341.1	44415.4	52178.6	39513.5	60624.6	51955.6	59867	Calm1	317.708	264.961	309.903	304.488	812.81	657.065	687.404	P0DP26	Calm1	3	4	57482.4	44862.2	-0.357621	1.58739	1.70846
P14211	Calr	Calreticulin	CALR_MOUSE	47994.5	35	33	27	32	34	31	33	1563410432	1728643072	1467832064	1323241216	730054592	703512192	795475904	P14211	Calr	47994.5		47994.5	Calr	1.72458e+06	2.04764e+06	1.8921e+06	1.53704e+06	606852	608549	611264	Calr	12641.9	12215.2	11237.7	11844.3	8136.21	7696.11	7018.65	P14211	Calr	3	4	608888	1.80034e+06	1.56402	4.58763	3.51909
O35887	Calu	Calumenin	CALU_MOUSE	37063.7	18	18	18	18	17	19	18	49232356	52305520	45673208	41536248	21496698	24378066	27903396	O35887	Calu	37063.7		37063.7	Calu	70324.1	80230.2	76237.9	62476.5	23138.9	27306.5	27765.3	Calu	515.503	478.614	452.797	481.44	310.228	345.336	318.806	O35887	Calu	3	4	26070.2	72317.2	1.47194	4.25438	3.46623
Q8BW96	Camk1d	Calcium/calmodulin-dependent protein kinase type 1D	KCC1D_MOUSE	42918.8	9	10	10	10	15	15	15	2.42114e+06	3496426	3.00602e+06	2.71043e+06	5146158	4677757	5.16885e+06	Q8BW96	Camk1d	42918.8		42918.8	Camk1d	2986.59	4631.44	4333.15	3520.71	4783.6	4524.86	4441.61	Camk1d	21.8929	27.6289	25.7357	27.1303	64.1349	57.2244	50.9994	Q8BW96	Camk1d	3	4	4583.36	3867.97	-0.244828	0.731623	0.947776
P28652	Camk2b	Calcium/calmodulin-dependent protein kinase type II subunit beta	KCC2B_MOUSE	60460.9	1	1	1	0	1	1	1	3201819	2586192	3.7623e+06	NaN	4.90922e+06	2.9755e+06	4.69372e+06	P28652	Camk2b	60460.9		60460.9	Camk2b	2803.66	2431.79	3849.8		3239.34	2043.15	2863.1	Camk2b	20.5519	14.5069	22.865		43.4307	25.8391	32.8747	P28652	Camk2b	3	3	2715.2	3028.41	0.157504	0.218658	0.486903
Q6PHZ2	Camk2d	Calcium/calmodulin-dependent protein kinase type II subunit delta	KCC2D_MOUSE	56369.4	24	23	23	24	28	29	28	70652648	80846040	76109584	68365992	69025256	71453208	88478584	Q6PHZ2	Camk2d	56369.4		56369.4	Camk2d	66357.1	81537	83532.3	67613.8	48852.1	52625.2	57888	Camk2d	486.424	486.41	496.12	521.027	654.973	665.533	664.681	Q6PHZ2	Camk2d	3	4	53121.8	74760	0.492964	2.02842	2.07872
Q6PHZ2-2;Q6PHZ2-4;Q6PHZ2-5	Camk2d	Isoform 2 of Calcium/calmodulin-dependent protein kinase type II subunit delta;Isoform 3 of Calcium/calmodulin-dependent protein kinase type II subunit delta;Isoform 4 of Calcium/calmodulin-dependent protein kinase type II subunit delta	KCC2D_MOUSE	54113.83;55645.47;57747.89	1	1	1	1	1	0	1	2.11592e+06	2.33316e+06	2.78355e+06	3003818	1589104	NaN	1.58899e+06	Q6PHZ2	Camk2d	54113.8		54113.8	Camk2d	2070.11	2451.18	3182.36	3094.6	1171.56		1082.94	Camk2d	15.1747	14.6226	18.9009	23.8467	15.7073		12.4346	Q6PHZ2	Camk2d	2	4	1127.25	2699.56	1.25992	2.28781	2.28602
Q923T9;Q923T9-2	Camk2g	Calcium/calmodulin-dependent protein kinase type II subunit gamma;Isoform 2 of Calcium/calmodulin-dependent protein kinase type II subunit gamma	KCC2G_MOUSE	59606.87;59606.87-2	7	8	10	8	10	9	11	1.60046e+06	1973410	1.98947e+06	1.5615e+06	1.61435e+06	1.61533e+06	5098646	Q923T9	Camk2g	59606.9		59606.9	Camk2g	1421.51	1882.18	2064.9	1460.44	1080.49	1125.07	3154.66	Camk2g	10.4202	11.2282	12.264	11.254	14.4864	14.2284	36.2224	Q923T9	Camk2g	3	4	1786.74	1707.26	-0.0656514	0.0847585	0.369088
Q8C078;Q8C078-2;Q8C078-3;Q8C078-4;Q8C078-5	Camkk2	Calcium/calmodulin-dependent protein kinase kinase 2;Isoform 2 of Calcium/calmodulin-dependent protein kinase kinase 2;Isoform 3 of Calcium/calmodulin-dependent protein kinase kinase 2;Isoform 4 of Calcium/calmodulin-dependent protein kinase kinase 2;Isoform 5 of Calcium/calmodulin-dependent protein kinase kinase 2	KKCC2_MOUSE	64617.5;64617.5-2;64617.5-3;64617.5-4;64617.5-5	6	7	7	7	6	6	7	1.45766e+06	2.53704e+06	2.15778e+06	1.90943e+06	1.01968e+06	968564	1.50143e+06	Q8C078	Camkk2	64617.5		64617.5	Camkk2	1194.29	2232.12	2065.93	1647.37	629.551	622.291	856.938	Camkk2	8.75461	13.3157	12.2701	12.6945	8.44055	7.86991	9.83952	Q8C078	Camkk2	3	4	702.927	1784.92	1.34442	2.34006	2.32633
P49070	Camlg	Guided entry of tail-anchored proteins factor CAMLG	CAMLG_MOUSE	32542.1	1	0	2	3	2	1	0	129224	NaN	380359	3.6712e+06	251217	258493	NaN	P49070	Camlg	32542.1		32542.1	Camlg	210.233		723.112	6289.28	307.98	329.776		Camlg	1.54109		4.29476	48.4648	4.12917	4.17057		P49070	Camlg	2	3	318.878	2407.54	2.91648	0.352981	0.607062
A2AHC3	Camsap1	Calmodulin-regulated spectrin-associated protein 1	CAMP1_MOUSE	175887	8	6	4	5	0	5	2	6.18204e+06	1.06902e+06	6914007	4.81231e+06	NaN	2.33528e+06	136412	A2AHC3	Camsap1	175887		175887	Camsap1	1860.8	345.534	2431.94	1525.31		551.213	28.6031	Camsap1	13.6404	2.06129	14.444	11.7539		6.971	0.328426	A2AHC3	Camsap1	2	4	289.908	1540.9	2.4101	0.959647	1.15164
Q8C1B1;Q8C1B1-2	Camsap2	Calmodulin-regulated spectrin-associated protein 2;Isoform 2 of Calmodulin-regulated spectrin-associated protein 2	CAMP2_MOUSE	164332.55;164332.55-2	3	6	6	5	3	4	3	315124	868376	843677	559299	215782	340972	307775	Q8C1B1	Camsap2	164333		164333	Camsap2	101.522	300.416	317.622	189.74	52.3855	86.1411	69.0723	Camsap2	0.744195	1.79214	1.88644	1.46213	0.702345	1.0894	0.793101	Q8C1B1	Camsap2	3	4	69.1996	227.325	1.71592	1.68403	1.79168
Q6ZQ38	Cand1	Cullin-associated NEDD8-dissociated protein 1	CAND1_MOUSE	136332	59	61	66	61	68	68	72	236953408	273708384	266390080	210930448	163108048	176444064	223560240	Q6ZQ38	Cand1	136332		136332	Cand1	92017.1	114138	120887	86254.4	47730.7	53731.1	60477.2	Cand1	674.522	680.893	717.98	664.671	639.937	679.519	694.41	Q6ZQ38	Cand1	3	4	53979.7	103324	0.93669	2.64512	2.55973
Q6ZQ73	Cand2	Cullin-associated NEDD8-dissociated protein 2	CAND2_MOUSE	135633	23	23	26	24	19	25	24	10141054	12520225	14108202	30307172	5750918	6.95907e+06	8316847	Q6ZQ73	Cand2	135633		135633	Cand2	3958.41	5247.92	6435.26	12457.2	1691.58	2130.11	2261.46	Cand2	29.0167	31.3066	38.2207	95.9942	22.6794	26.9388	25.9665	Q6ZQ73	Cand2	3	4	2027.72	7024.69	1.79258	1.9328	2.0017
Q8VCF1;Q8VCF1-3	Cant1	Soluble calcium-activated nucleotidase 1;Isoform 3 of Soluble calcium-activated nucleotidase 1	CANT1_MOUSE	45652.5;45652.5-3	14	12	13	13	13	13	11	9631656	4.85648e+06	9065867	8.22874e+06	2.6029e+06	2406925	2.69698e+06	Q8VCF1	Cant1	45652.5		45652.5	Cant1	11169.6	6047.79	12285.8	10048.6	2274.63	2188.84	2178.74	Cant1	81.8778	36.0782	72.9686	77.4341	30.4966	27.6815	25.0167	Q8VCF1	Cant1	3	4	2214.07	9887.96	2.15897	3.25895	2.97895
P35564	Canx	Calnexin	CALX_MOUSE	67277.9	49	48	46	46	48	48	48	627784576	682999616	537325632	489822944	139492384	153212064	181854800	P35564	Canx	67277.9		67277.9	Canx	494015	577148	494110	405887	82717.4	94544.4	99688.7	Canx	3621.33	3442.99	2934.65	3127.74	1109.01	1195.67	1144.64	P35564	Canx	3	4	92316.8	492790	2.41631	4.91414	3.54164	up
P40124	Cap1	Adenylyl cyclase-associated protein 1	CAP1_MOUSE	51564.8	38	37	39	38	45	45	49	925259584	940889472	845664512	802666240	994762112	933066752	1174764288	P40124	Cap1	51564.8		51564.8	Cap1	949975	1.03735e+06	1.01462e+06	867801	769635	751233	840216	Cap1	6963.7	6188.31	6026.09	6687.21	10318.7	9500.59	9647.52	P40124	Cap1	3	4	787028	967436	0.297751	1.859	1.93958
P24452	Capg	Macrophage-capping protein	CAPG_MOUSE	39240.4	12	12	12	12	15	15	15	508769600	590818752	476315008	442154688	547173184	661465280	788250624	P24452	Capg	39240.4		39240.4	Capg	686420	855973	750964	628173	556302	699824	740840	Capg	5031.73	5106.32	4460.18	4840.66	7458.48	8850.44	8506.47	P24452	Capg	3	4	665655	730383	0.133877	0.374798	0.626273
O35350	Capn1	Calpain-1 catalytic subunit	CAN1_MOUSE	82106.3	44	42	42	42	53	52	52	106993536	111747456	94399504	86687816	98126992	98556664	135702848	O35350	Capn1	82106.3		82106.3	Capn1	68989.5	77375	71129.8	58860	47679.4	49833.9	60954.5	Capn1	505.721	461.581	422.459	453.571	639.25	630.232	699.891	O35350	Capn1	3	4	52822.6	69088.5	0.387291	1.47574	1.61193
Q9JLG8-2	Capn15	Isoform 2 of Calpain-15	CAN15_MOUSE	115346	5	5	4	3	0	6	4	1.15606e+06	1.15153e+06	2.01605e+06	702636	NaN	738251	762005	Q9JLG8	Capn15	115346		115346	Capn15	530.616	567.561	1081.33	339.599		265.715	243.64	Capn15	3.88963	3.3858	6.4223	2.61693		3.36041	2.79752	Q9JLG8	Capn15	2	4	254.678	629.776	1.30617	1.07191	1.25167
O08529	Capn2	Calpain-2 catalytic subunit	CAN2_MOUSE	79872.2	23	25	25	24	27	27	25	8970668	11355337	10928974	8718262	8548817	8414271	9742536	O08529	Capn2	79872.2		79872.2	Capn2	5946.09	8082.47	8465.3	6085.17	4270.02	4373.57	4498.53	Capn2	43.5872	48.2161	50.2777	46.8919	57.2492	55.3111	51.6529	O08529	Capn2	3	4	4380.7	7144.76	0.705722	2.12215	2.1542
Q9R1S8	Capn7	Calpain-7	CAN7_MOUSE	92564.3	20	16	18	18	15	17	14	4379497	3.73834e+06	4.51325e+06	3.54206e+06	2.06163e+06	4.12555e+06	2387048	Q9R1S8	Capn7	92564.3		92564.3	Capn7	2504.86	2296.01	3016.5	2133.3	888.56	1850.35	951.067	Capn7	18.3616	13.6969	17.9158	16.439	11.9131	23.4007	10.9203	Q9R1S8	Capn7	3	4	1229.99	2487.67	1.01614	1.76658	1.86117
O88456	Capns1	Calpain small subunit 1	CPNS1_MOUSE	28406	9	11	11	10	13	13	15	37979212	30236456	27231972	28796192	69822032	67271408	41988440	O88456	Capns1	28406		28406	Capns1	70784.5	60514.6	59309.9	56514.9	98062.1	98318.6	54514.6	Capns1	518.878	361.001	352.257	435.5	1314.74	1243.4	625.947	O88456	Capns1	3	4	83631.8	61781	-0.436889	0.744194	0.959322
Q60865	Caprin1	Caprin-1	CAPR1_MOUSE	78168.9	22	21	21	21	24	24	24	118244952	165250864	145735520	107590240	30534228	28365626	32859286	Q60865	Caprin1	78168.9		78168.9	Caprin1	80084.9	120185	115343	76732.1	15583.8	15065.2	15503.1	Caprin1	587.054	716.963	685.051	591.293	208.935	190.524	178.009	Q60865	Caprin1	3	4	15384	98086.1	2.67262	4.33308	3.48368	up
P47753	Capza1	F-actin-capping protein subunit alpha-1	CAZA1_MOUSE	32939.8	14	14	15	15	21	21	21	274443936	337458464	293422624	243124336	255625424	300950016	410694112	P47753	Capza1	32939.8		32939.8	Capza1	441099	582424	551102	411478	309601	379306	459824	Capza1	3233.43	3474.46	3273.14	3170.82	4150.9	4796.95	5279.79	P47753	Capza1	3	4	382910	496526	0.374861	0.935409	1.13077
P47754	Capza2	F-actin-capping protein subunit alpha-2	CAZA2_MOUSE	32967.1	14	14	15	16	17	17	17	161515248	157982720	147702864	125764424	107558640	132116840	163952704	P47754	Capza2	32967.1		32967.1	Capza2	259379	272439	277183	212675	130162	166377	183414	Capza2	1901.35	1625.24	1646.27	1638.86	1745.11	2104.11	2105.99	P47754	Capza2	3	4	159984	255419	0.674936	2.08385	2.12405
P47757-2	Capzb	Isoform 2 of F-actin-capping protein subunit beta	CAPZB_MOUSE	30628.7	24	24	23	24	29	29	29	495990240	604784192	548154304	485377536	516839648	483000352	588578624	P47757	Capzb	30628.7		30628.7	Capzb	857327	1.12256e+06	1.10722e+06	883465	673203	654687	708711	Capzb	6284.55	6696.67	6576.05	6807.92	9025.8	8279.61	8137.55	P47757	Capzb	3	4	678867	992643	0.548146	2.10316	2.13964
P58660	Card10	Caspase recruitment domain-containing protein 10	CAR10_MOUSE	114414	0	0	1	1	0	0	0	NaN	NaN	349199	315297	NaN	NaN	NaN	P58660	Card10	114414		114414	Card10			188.822	153.631				Card10			1.12146	1.18387				P58660	Card10		2		171.226
Q8CIS0-2	Card11	Isoform 2 of Caspase recruitment domain-containing protein 11	CAR11_MOUSE	133468	51	54	56	53	63	66	63	58642428	72945976	66783812	58080120	56627276	52024328	68380344	Q8CIS0	Card11	133468		133468	Card11	23261.5	31071.7	30956.6	24260	16926.6	16182.5	18895.1	Card11	170.516	185.359	183.86	186.946	226.939	204.655	216.957	Q8CIS0	Card11	3	4	17334.7	27387.5	0.65985	2.20686	2.22181
Q9D1I2	Card19	Caspase recruitment domain-containing protein 19	CAR19_MOUSE	20936	5	7	5	5	8	8	9	1.50738e+06	3.07839e+06	1.47575e+06	1.16084e+06	3.0081e+06	3779560	4.33091e+06	Q9D1I2	Card19	20936		20936	Card19	3811.8	8359.28	4360.9	3091.12	5732.15	7494.84	7629.19	Card19	27.942	49.8674	25.9006	23.82	76.8523	94.7847	87.5997	Q9D1I2	Card19	3	4	6952.06	4905.78	-0.502958	0.748075	0.962473
E9PWH2	Card6	E9Caspase recruitment domain family, member 6	E9PWH2_MOU	131469	11	9	9	11	22	23	20	955010	940611	846137	1.75024e+06	3.43901e+06	3.95837e+06	4584963	E9PWH2	Card6	131469		131469	Card6	384.579	406.747	398.176	742.182	1043.59	1249.99	1286.19	Card6	2.81912	2.42646	2.36487	5.7192	13.9916	15.8082	14.7683	E9PWH2	Card6	3	4	1193.26	482.921	-1.30504	2.33141	2.3199	down
Q9CR86	Carhsp1	Calcium-regulated heat stable protein 1	CHSP1_MOUSE	16062.3	4	3	3	3	3	3	3	3.08555e+06	3.27395e+06	2.67724e+06	2.40409e+06	1.30302e+06	1.79823e+06	2.07536e+06	Q9CR86	Carhsp1	16062.3		16062.3	Carhsp1	10170.2	11587.9	10311.9	8344.17	3236.4	4647.86	4765.19	Carhsp1	74.5514	69.1278	61.2452	64.2997	43.3913	58.78	54.7148	Q9CR86	Carhsp1	3	4	4216.49	10103.5	1.26075	2.94456	2.77347
Q9WVG6;Q9WVG6-2	Carm1	Histone-arginine methyltransferase CARM1;Isoform 2 of Histone-arginine methyltransferase CARM1	CARM1_MOUSE	65853.66;65853.66-2	14	16	14	16	12	14	17	13919344	20112476	18363718	13634115	5492017	5.63881e+06	7623813	Q9WVG6	Carm1	65853.7		65853.7	Carm1	11190.3	17363	17252	11542.1	3327.14	3554.86	4269.59	Carm1	82.0292	103.579	102.464	88.9428	44.6078	44.9571	49.0242	Q9WVG6	Carm1	3	4	3717.2	14336.8	1.94744	3.43195	3.08319
Q3V3V9	Carmil2	Capping protein, Arp2/3 and myosin-I linker protein 2	CARL2_MOUSE	141372	26	26	28	27	36	36	35	12116393	14067151	13348963	11389509	12503162	12823710	16405348	Q3V3V9	Carmil2	141372		141372	Carmil2	4537.46	5656.96	5841.75	4491.39	3528.39	3765.88	4279.73	Carmil2	33.2614	33.7467	34.6957	34.6104	47.306	47.6258	49.1407	Q3V3V9	Carmil2	3	4	3858	5131.89	0.411638	1.49272	1.62699
Q3V3V9-2	Carmil2	Isoform 2 of Capping protein, Arp2/3 and myosin-I linker protein 2	CARL2_MOUSE	79761.5	3	2	3	2	2	2	1	1.11753e+06	915769	1.00537e+06	1.06822e+06	217952	335025	288176	Q3V3V9	Carmil2	79761.5		79761.5	Carmil2	741.769	652.728	779.811	746.631	109.015	174.381	133.247	Carmil2	5.43746	3.89386	4.63151	5.75349	1.46159	2.20534	1.52997	Q3V3V9	Carmil2	3	4	138.881	730.235	2.39451	4.42629	3.50187	up
Q80UY1	Carnmt1	Carnosine N-methyltransferase	CARME_MOUSE	46338.7	7	6	8	6	8	9	8	4782362	6408124	6.52277e+06	4074207	2.49481e+06	2.7866e+06	3.50558e+06	Q80UY1	Carnmt1	46338.7		46338.7	Carnmt1	5463.87	7861.88	8708.56	4901.6	2147.9	2496.58	2790.04	Carnmt1	40.0524	46.9001	51.7224	37.7714	28.7974	31.5734	32.0357	Q80UY1	Carnmt1	3	4	2478.17	6733.98	1.44218	2.58208	2.51298
Q9ER72	Cars1	Cysteine--tRNA ligase, cytoplasmic	SYCC_MOUSE	94859.8	50	49	50	48	40	40	35	72623544	88406728	75304944	62833828	11469381	11384467	15099871	Q9ER72	Cars1	94859.8		94859.8	Cars1	40532	52983.7	49113.4	36927.5	4823.66	4982.48	5870.63	Cars1	297.115	316.075	291.697	284.561	64.672	63.0118	67.4077	Q9ER72	Cars1	3	4	5225.59	44889.1	3.1027	5.16097	3.54164	up
Q8BYM8	Cars2	Probable cysteine--tRNA ligase, mitochondrial	SYCM_MOUSE	61271.6	13	14	13	11	11	12	11	3170019	4061776	2802337	2136994	2.23682e+06	2.26741e+06	2408986	Q8BYM8	Cars2	61271.6		61271.6	Cars2	2739.08	3768.74	2829.56	1944.39	1456.43	1536.33	1450	Cars2	20.0785	22.4825	16.8055	14.9833	19.5268	19.4295	16.6492	Q8BYM8	Cars2	3	4	1480.92	2820.44	0.929425	1.91371	1.98536
Q8K3W3	Casc3	Protein CASC3	CASC3_MOUSE	75770.2	12	13	11	12	11	12	12	3.94305e+06	4919699	4.3826e+06	4.15197e+06	2.52851e+06	3269435	5.16145e+06	Q8K3W3	Casc3	75770.2		75770.2	Casc3	2755.09	3691.3	3578.42	3054.88	1331.33	1791.39	2512.27	Casc3	20.1959	22.0205	21.2532	23.5407	17.8494	22.6551	28.8464	Q8K3W3	Casc3	3	4	1878.33	3269.92	0.799808	1.68974	1.79614
Q7TN73	Casd1	N-acetylneuraminate 9-O-acetyltransferase	CASD1_MOUSE	91603.5	3	4	3	4	3	3	2	361026	347460	355505	294559	142300	166648	239852	Q7TN73	Casd1	91603.5		91603.5	Casd1	208.655	215.642	240.1	179.266	61.9743	75.5271	96.566	Casd1	1.52952	1.28641	1.42602	1.38141	0.830905	0.955165	1.10879	Q7TN73	Casd1	3	4	78.0224	210.916	1.43471	3.25582	2.97673
Q8VHK1	Caskin2	Caskin-2	CSKI2_MOUSE	126779	1	2	3	0	2	2	0	386670	465260	412332	NaN	88229.9	134316	NaN	Q8VHK1	Caskin2	126779		126779	Caskin2	161.471	208.635	201.214		27.7643	43.9842		Caskin2	1.18365	1.24462	1.19506		0.372243	0.556254		Q8VHK1	Caskin2	2	3	35.8743	190.44	2.40832	2.45673	2.4181	up
P29452	Casp1	Caspase-1	CASP1_MOUSE	45640.5	24	27	26	24	30	29	31	35274224	46113984	39539964	35305980	31273900	31408536	47870604	P29452	Casp1	45640.5		45640.5	Casp1	40917.6	57441	53597.5	43125.8	27337	28570.2	38682.3	Casp1	299.942	342.665	318.33	332.324	366.514	361.317	444.158	P29452	Casp1	3	4	31529.8	48770.5	0.62929	1.66064	1.77136
O89094-2	Casp14	Isoform 2 of Caspase-14	CASPE_MOUSE	18223.6	1	1	1	1	1	1	1	4223000	4142080	5579812	4.09514e+06	14061089	12895915	16690167	O89094	Casp14	18223.6		18223.6	Casp14	12268.4	12921.8	18942.8	12527.7	30782.5	29378.7	33776.9	Casp14	89.9324	77.0852	112.506	96.5378	412.708	371.543	387.833	O89094	Casp14	3	4	31312.7	14165.2	-1.1444	2.85417	2.70957	down
P29594	Casp2	Caspase-2	CASP2_MOUSE	50660.9	14	15	16	16	15	15	15	3.49013e+06	5780899	4.72967e+06	4.12878e+06	3.30171e+06	3.51804e+06	5.04329e+06	P29594	Casp2	50660.9		50660.9	Casp2	3647.3	6487.27	5775.86	4543.46	2600.07	2882.99	3671.43	Casp2	26.7362	38.6999	34.3044	35.0116	34.8598	36.4602	42.156	P29594	Casp2	3	4	3051.5	5113.47	0.744786	1.46462	1.60204
P70677	Casp3	Caspase-3	CASP3_MOUSE	31474.8	7	6	9	8	10	9	10	7415427	11110497	11996459	8412478	4.04937e+06	4200550	5.14035e+06	P70677	Casp3	31474.8		31474.8	Casp3	12473.1	20068.3	23580.3	14900.5	5132.68	5540.63	6023.15	Casp3	91.4331	119.718	140.05	114.822	68.8151	70.0705	69.159	P70677	Casp3	3	4	5565.49	17755.5	1.67369	2.88994	2.73579
P70343	Casp4	Caspase-4	CASP4_MOUSE	42741.9	14	15	15	12	0	0	0	4.93004e+06	7134091	6.1897e+06	4356809	NaN	NaN	NaN	P70343	Casp4	42741.9		42741.9	Casp4	6106.59	9489.07	8959.3	5682.67				Casp4	44.7637	56.6072	53.2117	43.7903				P70343	Casp4		4		7559.41				up-a
O08738	Casp6	Caspase-6	CASP6_MOUSE	31595	16	18	17	18	20	21	21	21808498	28342030	22994380	20101976	11728559	11920242	17522632	O08738	Casp6	31595		31595	Casp6	36543.4	50997.8	45025.8	35469.8	14809.7	15663.2	20453.8	Casp6	267.878	304.228	267.42	273.328	198.557	198.088	234.854	O08738	Casp6	3	4	16975.6	42009.2	1.30725	2.99529	2.80959
P97864	Casp7	Caspase-7	CASP7_MOUSE	34060.6	5	6	6	7	5	5	7	815625	1.82198e+06	1.67907e+06	1.49224e+06	984862	1.04791e+06	1.32548e+06	P97864	Casp7	34060.6		34060.6	Casp7	1267.77	3041.09	3049.82	2442.45	1153.57	1277.28	1435.21	Casp7	9.29326	18.1417	18.1137	18.8213	15.4662	16.1533	16.4793	P97864	Casp7	3	4	1288.68	2450.28	0.927049	1.18344	1.35286
O89110	Casp8	Caspase-8	CASP8_MOUSE	55356.9	31	35	33	33	36	36	37	55786436	68736616	62207608	47330916	34647552	33568412	41331712	O89110	Casp8	55356.9		55356.9	Casp8	53353.1	70592.1	69523.3	47666.3	24970.1	25175.3	27536.3	Casp8	391.099	421.118	412.917	367.314	334.78	318.383	316.177	O89110	Casp8	3	4	25893.9	60283.7	1.21916	3.04318	2.8434
Q9WUF3	Casp8ap2	C8CASP8-associated protein 2	C8AP2_MOU	219091	9	10	8	4	3	3	1	721090	955260	845621	390654	203362	173538	36557.5	Q9WUF3	Casp8ap2	219091		219091	Casp8ap2	174.248	247.877	238.787	99.4048	37.031	32.8841	6.15384	Casp8ap2	1.27731	1.47872	1.41822	0.766007	0.496483	0.415874	0.0706595	Q9WUF3	Casp8ap2	3	4	25.3563	190.079	2.90618	2.01077	2.06471	up
Q8C3Q9	Casp9	Caspase-9	CASP9_MOUSE	49979.1	3	5	4	3	6	6	5	968860	1.69259e+06	1.4236e+06	971270	1.33917e+06	1.39595e+06	1.6007e+06	Q8C3Q9	Casp9	49979.1		49979.1	Casp9	1026.3	1925.33	1762.21	1083.4	1068.97	1159.57	1181.18	Casp9	7.5232	11.4856	10.4662	8.34864	14.332	14.6647	13.5625	Q8C3Q9	Casp9	3	4	1136.57	1449.31	0.350674	0.469744	0.711934
O09165	Casq1	Calsequestrin-1	CASQ1_MOUSE	46378	2	2	0	0	1	1	0	464107	474261	NaN	NaN	88656.3	58614.4	NaN	O09165	Casq1	46378		46378	Casq1	529.796	581.359			76.2635	52.4696		Casq1	3.88361	3.46811			1.02248	0.663566		O09165	Casq1	2	2	64.3666	555.578	3.10961	2.10911	2.14448	up
P51125;P51125-2	Cast	Calpastatin;Isoform 2 of Calpastatin	ICAL_MOUSE	84921.73;84921.73-2	38	34	36	35	41	45	40	38400660	45539108	40628692	36989164	41991784	49492620	58729212	P51125	Cast	84921.7		84921.7	Cast	23939.9	30486.3	29598.7	24282.5	19727.2	24195.6	25505.2	Cast	175.489	181.867	175.794	187.12	264.487	305.994	292.856	P51125	Cast	3	4	23142.7	27076.9	0.226505	0.751034	0.965067
P51125-6	Cast	Isoform 6 of Calpastatin	ICAL_MOUSE	83626.4	1	0	1	1	1	1	1	26443.9	NaN	35119	24360.1	57836.6	35890.2	44500.5	P51125	Cast	83626.4		83626.4	Cast	16.7411		25.9811	16.2395	27.5917	17.8175	19.6252	Cast	0.122719		0.154308	0.125141	0.369929	0.225332	0.225341	P51125	Cast	3	3	21.6782	19.6539	-0.141427	0.19837	0.468482
Q9CWL2;Q9CWL2-2	Casz1	Zinc finger protein castor homolog 1;Isoform 2 of Zinc finger protein castor homolog 1	CASZ1_MOUSE	191187.83;191187.83-2	0	0	2	0	0	0	0	NaN	NaN	214851	NaN	NaN	NaN	NaN	Q9CWL2	Casz1	191188		191188	Casz1			69.5242					Casz1			0.412923					Q9CWL2	Casz1		1		69.5242
P24270	Cat	Catalase	CATA_MOUSE	59795.3	29	28	31	31	37	38	37	74541080	86592720	75396776	64609728	75256912	77533792	98142616	P24270	Cat	59795.3		59795.3	Cat	65998	82329.2	78008.9	60237.8	50210.9	53831.8	60531.9	Cat	483.792	491.136	463.315	464.189	673.19	680.793	695.038	P24270	Cat	3	4	54858.2	71643.5	0.385127	1.36695	1.51623
O70374;O70374-2	Cbfa2t2	Protein CBFA2T2;Isoform 2 of Protein CBFA2T2	MTG8R_MOUSE	65904.27;65904.27-2	0	1	0	0	0	0	0	NaN	26392	NaN	NaN	NaN	NaN	NaN	O70374	Cbfa2t2	65904.3		65904.3	Cbfa2t2		22.7666						Cbfa2t2		0.135814						O70374	Cbfa2t2		1		22.7666
O54972;O54972-2	Cbfa2t3	Protein CBFA2T3;Isoform 2 of Protein CBFA2T3	MTG16_MOUSE	68032.33;68032.33-2	1	0	1	1	0	2	0	281157	NaN	274636	161794	NaN	415367	NaN	O54972	Cbfa2t3	68032.3		68032.3	Cbfa2t3	218.794		249.747	132.582		253.473		Cbfa2t3	1.60385		1.48331	1.02167		3.20559		O54972	Cbfa2t3	1	3	253.473	200.374	-0.339134	0.254626	0.518983
Q08024	Cbfb	Core-binding factor subunit beta	PEBB_MOUSE	22030.5	11	10	10	10	15	13	14	35795120	39007784	34262996	31547562	34334836	37185652	50287548	Q08024	Cbfb	22030.5		22030.5	Cbfb	86020.5	100662	96218.7	79832.6	62177	70075.5	84184.1	Cbfb	630.564	600.502	571.469	615.185	833.623	886.222	966.617	Q08024	Cbfb	3	4	72145.5	90683.5	0.32993	1.21344	1.37978
Q08024-2	Cbfb	Isoform 2 of Core-binding factor subunit beta	PEBB_MOUSE	21517.2	1	1	1	1	1	1	1	6058635	6558062	7547690	5214132	2.78972e+06	3.20506e+06	3.37289e+06	Q08024	Cbfb	21517.2		21517.2	Cbfb	14907.1	17327.3	21701.4	13509.4	5172.43	6183.95	5781.1	Cbfb	109.275	103.366	128.89	104.102	69.348	78.2064	66.3797	Q08024	Cbfb	3	4	5712.5	16861.3	1.56152	3.3694	3.04519
P22682	Cbl	E3 ubiquitin-protein ligase CBL	CBL_MOUSE	100564	34	33	36	34	27	30	28	32803074	39482576	39951872	32562832	16850382	16383507	22384562	P22682	Cbl	100564		100564	Cbl	17269.3	22320.5	24578.4	18051.7	6684.78	6763.64	8209.2	Cbl	126.591	133.153	145.978	139.105	89.6245	85.5375	94.2595	P22682	Cbl	3	4	7219.2	20555	1.50958	3.57045	3.161
Q3TTA7	Cblb	E3 ubiquitin-protein ligase CBL-B	CBLB_MOUSE	109092	17	21	22	19	23	25	24	8381786	9971332	8629808	6831909	8617522	8433037	11104176	Q3TTA7	Cblb	109092		109092	Cblb	4067.67	5196.36	4894.03	3491.3	3151.43	3209.27	3753.94	Cblb	29.8176	30.999	29.0669	26.9037	42.2521	40.5865	43.1034	Q3TTA7	Cblb	3	4	3371.55	4412.34	0.388133	1.11702	1.29224
Q9JIY2	Cbll1	E3 ubiquitin-protein ligase Hakai	HAKAI_MOUSE	54444.1	11	11	11	9	10	10	10	2.68385e+06	4.57985e+06	4159588	2.54463e+06	3.42462e+06	2.50061e+06	2.92212e+06	Q9JIY2	Cbll1	54444.1		54444.1	Cbll1	2609.82	4782.34	4726.7	2605.63	2509.46	1906.82	1979.43	Cbll1	19.131	28.5291	28.0731	20.0788	33.645	24.1149	22.7282	Q9JIY2	Cbll1	3	4	2131.91	3681.12	0.788001	1.17943	1.34934
P48758	Cbr1	Carbonyl reductase [NADPH] 1	CBR1_MOUSE	30641.2	19	19	20	19	23	23	23	27967962	33533630	31956322	26404650	45659700	45184580	61051492	P48758	Cbr1	30641.2		30641.2	Cbr1	48323.4	62217.8	64522.2	48041.1	59449.3	61220.9	73482.6	Cbr1	354.23	371.161	383.215	370.202	797.051	774.24	843.741	P48758	Cbr1	3	4	64717.6	55776.1	-0.21451	0.66136	0.884291
P08074	Cbr2	Carbonyl reductase [NADPH] 2	CBR2_MOUSE	25958.2	0	1	0	0	0	0	0	NaN	448967	NaN	NaN	NaN	NaN	NaN	P08074	Cbr2	25958.2		25958.2	Cbr2		983.286						Cbr2		5.86581						P08074	Cbr2		1		983.286
Q91VT4	Cbr4	3-oxoacyl-[acyl-carrier-protein] reductase	CBR4_MOUSE	25414.6	9	9	9	9	8	10	10	5.37902e+06	6181815	5623368	5007911	3.47999e+06	5.61768e+06	7.69623e+06	Q91VT4	Cbr4	25414.6		25414.6	Cbr4	11205.2	13828.4	13689	10985.3	5462.77	9176.74	11168.3	Cbr4	82.1389	82.4934	81.3025	84.6518	73.2408	116.055	128.237	Q91VT4	Cbr4	3	4	8602.61	12427	0.530628	1.04507	1.22742
P83917	Cbx1	Chromobox protein homolog 1	CBX1_MOUSE	21417.8	10	10	11	10	13	12	12	47634408	46956824	36367000	33846192	62857712	71150864	84243344	P83917	Cbx1	21417.8		21417.8	Cbx1	117747	124642	105049	88099.6	117086	137918	145062	Cbx1	863.13	743.553	623.914	678.89	1569.8	1744.2	1665.63	P83917	Cbx1	3	4	133355	108884	-0.29248	0.971967	1.1625
P30658	Cbx2	Chromobox protein homolog 2	CBX2_MOUSE	54918.1	0	0	1	0	0	0	0	NaN	NaN	57692.9	NaN	NaN	NaN	NaN	P30658	Cbx2	54918.1		54918.1	Cbx2			64.9928					Cbx2			0.386009					P30658	Cbx2		1		64.9928
P23198	Cbx3	Chromobox protein homolog 3	CBX3_MOUSE	20855.4	9	9	10	9	16	14	15	178721856	249098496	234359440	208837792	336144512	308980992	404184768	P23198	Cbx3	20855.4		20855.4	Cbx3	453692	679034	695219	558250	643022	615075	714751	Cbx3	3325.74	4050.79	4129.09	4301.83	8621.16	7778.64	8206.9	P23198	Cbx3	3	4	657616	596548	-0.140606	0.382639	0.633323
O55187	Cbx4	E3 SUMO-protein ligase CBX4	CBX4_MOUSE	60522.6	13	15	15	12	4	8	8	4462526	5062026	4964697	3.70569e+06	534649	1.17806e+06	1.60904e+06	O55187	Cbx4	60522.6		60522.6	Cbx4	3903.6	4754.95	5074.97	3413.42	352.428	808.099	980.492	Cbx4	28.6149	28.3657	30.1416	26.3036	4.72508	10.2198	11.2582	O55187	Cbx4	3	4	713.673	4286.74	2.58654	2.91598	2.75315	up
Q61686	Cbx5	Chromobox protein homolog 5	CBX5_MOUSE	22186	11	10	11	11	15	14	14	27998362	33497374	36522128	27580496	20134126	23281324	29617464	Q61686	Cbx5	22186		22186	Cbx5	66812.4	85836.5	101844	69304.7	36205.4	43565.7	49233.8	Cbx5	489.761	512.059	604.88	534.057	485.415	550.961	565.312	Q61686	Cbx5	3	4	43001.7	80949.4	0.912629	2.20247	2.2179
Q9DBY5	Cbx6	Chromobox protein homolog 6	CBX6_MOUSE	44459.9	1	1	0	0	1	2	1	37594.1	76206.2	NaN	NaN	78751.7	256402	122121	Q9DBY5	Cbx6	44459.9		44459.9	Cbx6	44.7666	97.4455			70.666	239.425	101.302	Cbx6	0.328157	0.581312			0.947437	3.02793	1.16316	Q9DBY5	Cbx6	3	2	137.131	71.106	-0.947509	0.445025	0.68981
Q8VDS3	Cbx7	Chromobox protein homolog 7	CBX7_MOUSE	18109.4	2	2	2	3	5	5	5	1.91703e+06	1.7685e+06	1884143	1.59941e+06	2.91735e+06	2.79805e+06	3.29104e+06	Q8VDS3	Cbx7	18109.4		18109.4	Cbx7	5604.38	5551.89	6436.78	4923.73	6426.93	6414.58	6702.3	Cbx7	41.0823	33.1199	38.2298	37.9419	86.1675	81.123	76.957	Q8VDS3	Cbx7	3	4	6514.6	5629.2	-0.210749	1.14603	1.31893
Q9QXV1	Cbx8	Chromobox protein homolog 8	CBX8_MOUSE	39860	5	5	5	5	9	9	7	803747	6322937	2.70223e+06	3.5055e+06	4.32787e+06	5655596	3439014	Q9QXV1	Cbx8	39860		39860	Cbx8	1067.54	9018.23	4194.14	4902.88	4331.68	5890.56	3181.93	Cbx8	7.82551	53.7984	24.9101	37.7813	58.0759	74.496	36.5355	Q9QXV1	Cbx8	3	4	4468.06	4795.7	0.102093	0.0939032	0.37705
Q8K1A6	Cc2d1a	C2Coiled-coil and C2 domain-containing protein 1A	C2D1A_MOU	103698	24	26	24	24	17	20	15	9208381	10318529	9727645	7928455	2642224	3.19309e+06	3.35744e+06	Q8K1A6	Cc2d1a	103698		103698	Cc2d1a	4701.28	5657.02	5803.58	4262.43	1016.53	1278.37	1194.08	Cc2d1a	34.4622	33.747	34.469	32.846	13.6288	16.1671	13.7106	Q8K1A6	Cc2d1a	3	4	1162.99	5106.08	2.13437	4.4925	3.50698
Q8BRN9	Cc2d1b	C2Coiled-coil and C2 domain-containing protein 1B	C2D1B_MOU	93091.3	28	30	28	28	29	29	29	31923332	39433316	36391096	27658480	22955242	23212822	35625964	Q8BRN9	Cc2d1b	93091.3		93091.3	Cc2d1b	18155.2	24082.1	24184.9	16563.7	9837.66	10352.2	14114	Cc2d1b	133.085	143.662	143.641	127.639	131.896	130.921	162.06	Q8BRN9	Cc2d1b	3	4	11434.6	20746.5	0.859455	1.98508	2.04542
Q8CH18	Ccar1	Cell division cycle and apoptosis regulator protein 1	CCAR1_MOUSE	132060	42	44	44	41	46	49	48	66107120	77635888	67999088	57147200	71276568	75639752	92174504	Q8CH18	Ccar1	132060		132060	Ccar1	26502	33421.8	31855.9	24124.7	21532.5	23779	25741.4	Ccar1	194.27	199.378	189.2	185.903	288.691	300.725	295.568	Q8CH18	Ccar1	3	4	23684.3	28976.1	0.290932	0.961518	1.15313
Q8VDP4	Ccar2	Cell cycle and apoptosis regulator protein 2	CCAR2_MOUSE	103002	40	41	44	41	45	45	42	84577984	100039432	90346832	74892264	89792112	96782816	113934288	Q8VDP4	Ccar2	103002		103002	Ccar2	43472.3	55215.8	54265.6	40534.8	34778.5	39009.2	40794.5	Ccar2	318.669	329.391	322.298	312.359	466.283	493.336	468.41	Q8VDP4	Ccar2	3	4	38194	48372.1	0.340829	1.14676	1.31934
Q8VE99	Ccdc115	Coiled-coil domain-containing protein 115	CC115_MOUSE	19742.6	9	9	12	10	12	13	10	21658960	24052090	25469248	19174048	7883055	7504819	9281897	Q8VE99	Ccdc115	19742.6		19742.6	Ccdc115	58081.3	69261	79812.5	54143.8	15929.8	15781.6	17339.1	Ccdc115	425.759	413.177	474.028	417.229	213.575	199.585	199.091	Q8VE99	Ccdc115	3	4	16350.2	65324.7	1.99832	4.3007	3.47934
Q6PB51	Ccdc117	Coiled-coil domain-containing protein 117	CC117_MOUSE	30427.4	8	7	10	9	8	9	7	3328243	3.24125e+06	3422797	2.38564e+06	1.13771e+06	1.37636e+06	1120312	Q6PB51	Ccdc117	30427.4		30427.4	Ccdc117	5790.99	6056.03	6959.45	4370.98	1491.71	1877.94	1357.9	Ccdc117	42.4502	36.1273	41.334	33.6825	19.9997	23.7497	15.5917	Q6PB51	Ccdc117	3	4	1575.85	5794.36	1.87852	3.59817	3.1769
Q8R344	Ccdc12	Coiled-coil domain-containing protein 12	CCD12_MOUSE	18891.4	9	8	9	8	10	10	10	13895221	14828286	15306155	11220448	8576893	9578408	11345838	Q8R344	Ccdc12	18891.4		18891.4	Ccdc12	38940.7	44623.8	50125.8	33112	18112.8	21049.7	22149.6	Ccdc12	285.451	266.204	297.71	255.159	242.843	266.208	254.326	Q8R344	Ccdc12	3	4	20437.4	41700.6	1.02886	2.73914	2.6281
Q9D8X2	Ccdc124	Coiled-coil domain-containing protein 124	CC124_MOUSE	25345.8	13	13	14	14	12	11	10	17698382	21268532	20610734	13387499	8847384	8.18694e+06	8925471	Q9D8X2	Ccdc124	25345.8		25345.8	Ccdc124	36968.3	47705.8	50309	29446.4	13926.1	13410.1	12987.3	Ccdc124	270.993	284.59	298.799	226.912	186.71	169.593	149.123	Q9D8X2	Ccdc124	3	4	13441.1	41107.4	1.61274	3.16033	2.91975
Q3TC33	Ccdc127	Coiled-coil domain-containing protein 127	CC127_MOUSE	30509	11	7	10	7	14	14	14	3088139	2725580	3.1764e+06	2.02864e+06	4526152	5.05374e+06	5.59287e+06	Q3TC33	Ccdc127	30509		30509	Ccdc127	5358.85	5078.91	6441.19	3706.95	5918.62	6877.02	6760.85	Ccdc127	39.2825	30.2983	38.2559	28.5655	79.3524	86.9714	77.6293	Q3TC33	Ccdc127	3	4	6518.83	5146.47	-0.341029	0.873939	1.07574
Q8C7V8;Q8C7V8-2	Ccdc134	Coiled-coil domain-containing protein 134;Isoform 2 of Coiled-coil domain-containing protein 134	CC134_MOUSE	26494.52;26494.52-2	4	4	4	4	4	4	4	3.63618e+06	3.92573e+06	3.39027e+06	2979741	2313223	2464158	3.51777e+06	Q8C7V8	Ccdc134	26494.5		26494.5	Ccdc134	7265.94	8423.71	7916.56	6269.9	3483.22	3861.25	4896.71	Ccdc134	53.2622	50.2518	47.0185	48.3155	46.7003	48.8319	56.225	Q8C7V8	Ccdc134	3	4	4080.39	7469.03	0.872212	2.52149	2.46715
Q8R0K4	Ccdc137	Coiled-coil domain-containing protein 137	CC137_MOUSE	32918	8	9	10	9	8	9	10	5003577	7538481	7072325	5.46922e+06	2.54543e+06	2809541	3.70344e+06	Q8R0K4	Ccdc137	32918		32918	Ccdc137	8047.29	13019.4	13291.9	9262.55	3084.94	3543.38	4149.21	Ccdc137	58.9898	77.6672	78.9442	71.3766	41.3605	44.8119	47.642	Q8R0K4	Ccdc137	3	4	3592.51	10905.3	1.60196	2.93922	2.77026
E9Q8Q6;E9Q8Q6-2	Ccdc141	Coiled-coil domain-containing protein 141;Isoform 2 of Coiled-coil domain-containing protein 141	CC141_MOUSE	173644.25;173644.25-2	1	0	0	1	0	0	0	4034877	NaN	NaN	3195602	NaN	NaN	NaN	E9Q8Q6	Ccdc141	173644		173644	Ccdc141	1230.19			1025.96				Ccdc141	9.01778			7.90599				E9Q8Q6	Ccdc141		2		1128.08
Q8C9M2;Q8C9M2-2	Ccdc15	Coiled-coil domain-containing protein 15;Isoform 2 of Coiled-coil domain-containing protein 15	CCD15_MOUSE	93527.5;93527.5-2	0	0	1	0	2	2	0	NaN	NaN	185216	NaN	189654	229847	NaN	Q8C9M2	Ccdc15	93527.5		93527.5	Ccdc15			122.518		80.8989	102.027		Ccdc15			0.727665		1.08463	1.2903		Q8C9M2	Ccdc15	2	1	91.4629	122.518	0.42173	0.424034	0.670586
Q9D162;Q9D162-2;Q9D162-3	Ccdc167	Coiled-coil domain-containing protein 167;Isoform 2 of Coiled-coil domain-containing protein 167;Isoform 3 of Coiled-coil domain-containing protein 167	CC167_MOUSE	11475.31;11475.31-2;11475.31-3	3	3	2	2	2	2	2	2.31248e+06	2.90065e+06	2639748	1.90442e+06	569277	604787	738656	Q9D162	Ccdc167	11475.3		11475.3	Ccdc167	10668.8	14370.4	14231.7	9252.02	1979.15	2188.03	2373.95	Ccdc167	78.2066	85.727	84.5258	71.2955	26.5349	27.6713	27.2581	Q9D162	Ccdc167	3	4	2180.38	12130.7	2.47602	4.2312	3.45622	up
Q3U155	Ccdc174	Coiled-coil domain-containing protein 174	CC174_MOUSE	53941.7	7	8	8	9	6	7	8	3.08559e+06	4.57026e+06	3217893	2.78977e+06	1.07138e+06	1.33353e+06	1639394	Q3U155	Ccdc174	53941.7		53941.7	Ccdc174	3028.42	4816.76	3690.67	2883.25	792.39	1026.35	1120.86	Ccdc174	22.1995	28.7345	21.9199	22.2181	10.6238	12.9798	12.8699	Q3U155	Ccdc174	3	4	979.866	3604.77	1.87925	3.28731	2.99482
B8JJH0;F7D3E1;J3QQ27	Ccdc191	B8Coiled-coil domain containing 191;F7D3Coiled-coil domain containing 191 (Fragment);J3Coiled-coil domain containing 191	B8JJH0_MOU;F7D3E1_M;J3QQ27_MOU	97082.7;NaN;103920.16	1	1	1	0	0	0	0	38040.8	27273.5	189351	NaN	NaN	NaN	NaN	B8JJH0	Ccdc191	97082.7		97082.7	Ccdc191	20.7448	15.9712	120.666					Ccdc191	0.152068	0.0952765	0.716668					B8JJH0	Ccdc191		3		52.4607
Q9JIG7	Ccdc22	Coiled-coil domain-containing protein 22	CCD22_MOUSE	70843.5	24	25	24	23	26	26	27	19720418	29531064	26666178	16008288	16759655	18663382	21662644	Q9JIG7	Ccdc22	70843.5		70843.5	Ccdc22	14737.3	23698.4	23287.3	12597.5	9438.09	10937.2	11277.3	Ccdc22	108.03	141.373	138.309	97.0752	126.539	138.319	129.488	Q9JIG7	Ccdc22	3	4	10550.9	18580.1	0.816399	1.37788	1.52547
Q78PG9	Ccdc25	Coiled-coil domain-containing protein 25	CCD25_MOUSE	24479.9	12	11	12	11	11	15	13	11418491	13199120	12733844	9954909	5.62004e+06	5398506	7995958	Q78PG9	Ccdc25	24479.9		24479.9	Ccdc25	24694.6	30653.1	32181.7	22670.8	9159.02	9155.44	12046.3	Ccdc25	181.021	182.862	191.135	174.699	122.797	115.786	138.318	Q78PG9	Ccdc25	3	4	10120.3	27550	1.44481	3.29666	2.99956
Q8CEG5	Ccdc28b	Coiled-coil domain-containing protein 28B	CC28B_MOUSE	22032.7	0	0	1	0	0	0	0	NaN	NaN	39585.3	NaN	NaN	NaN	NaN	Q8CEG5	Ccdc28b	22032.7		22032.7	Ccdc28b			111.154					Ccdc28b			0.660172					Q8CEG5	Ccdc28b		1		111.154
Q9CR29	Ccdc43	Coiled-coil domain-containing protein 43	CCD43_MOUSE	25049	6	7	6	6	4	5	5	5.86079e+06	5175729	2870502	4.27554e+06	1.21609e+06	1.81846e+06	1.54285e+06	Q9CR29	Ccdc43	25049		25049	Ccdc43	12387.1	11746.8	7089.67	9515.66	1936.85	3013.89	2271.58	Ccdc43	90.8022	70.0759	42.1075	73.3271	25.9678	38.1157	26.0827	Q9CR29	Ccdc43	3	4	2407.44	10184.8	2.08085	3.24863	2.97256
Q9D024	Ccdc47	PAT complex subunit CCDC47	CCD47_MOUSE	55843.8	21	21	22	20	21	21	20	30369146	40294516	27340692	21814412	19891206	18831396	36286160	Q9D024	Ccdc47	55843.8		55843.8	Ccdc47	28791.2	41021.4	30289.6	21777.5	14210.4	13999.8	23964	Ccdc47	211.051	244.714	179.898	167.816	190.522	177.051	275.16	Q9D024	Ccdc47	3	4	17391.4	30469.9	0.80901	1.35125	1.50214
Q810U5;Q810U5-3	Ccdc50	Coiled-coil domain-containing protein 50;Isoform 3 of Coiled-coil domain-containing protein 50	CCD50_MOUSE	35321.49;35321.49-3	10	10	9	10	13	13	15	19636230	22851354	20577734	17461680	10799403	10913165	14182273	Q810U5	Ccdc50	35321.5		35321.5	Ccdc50	29432.1	36780.1	36042.7	27560.4	12197.8	12827.1	14808.1	Ccdc50	215.749	219.412	214.067	212.379	163.538	162.219	170.03	Q810U5	Ccdc50	3	4	13277.6	32453.8	1.28939	3.55818	3.1521
Q3URS9;Q3URS9-2	Ccdc51	Mitochondrial potassium channel;Isoform 2 of Mitochondrial potassium channel	MITOK_MOUSE	45132.49;45132.49-2	12	12	11	9	12	13	11	4439501	5.62286e+06	4886672	3.70255e+06	2936866	3329962	3897056	Q3URS9	Ccdc51	45132.5		45132.5	Ccdc51	5207.71	7082.83	6698.57	4573.52	2596.06	3063.13	3184.5	Ccdc51	38.1746	42.2527	39.7846	35.2432	34.806	38.7384	36.565	Q3URS9	Ccdc51	3	4	2947.89	5890.66	0.998744	2.4251	2.39463
Q8R2N0	Ccdc59	Thyroid transcription factor 1-associated protein 26	TAP26_MOUSE	28033.8	3	3	4	5	4	4	5	1.37032e+06	1.72046e+06	2.1286e+06	1.37467e+06	832573	936760	1.15589e+06	Q8R2N0	Ccdc59	28033.8		28033.8	Ccdc59	2587.88	3489.01	4697.55	2733.73	1184.84	1387.27	1520.65	Ccdc59	18.9702	20.8138	27.9	21.066	15.8854	17.5444	17.4604	Q8R2N0	Ccdc59	3	4	1364.25	3377.04	1.30765	2.43406	2.40076
D3YZP9	Ccdc6	Coiled-coil domain-containing protein 6	CCDC6_MOUSE	52938.8	13	15	16	14	13	15	12	4895616	6612952	6.30925e+06	4.53435e+06	2328587	2590020	2.95871e+06	D3YZP9	Ccdc6	52938.8		52938.8	Ccdc6	4895.94	7101.68	7373.31	4775.07	1754.84	2031.16	2061.21	Ccdc6	35.8892	42.3652	43.792	36.7964	23.5276	25.6874	23.6672	D3YZP9	Ccdc6	3	4	1949.07	6036.5	1.63093	3.22729	2.95948
Q3UJV1	Ccdc61	Centrosomal protein CCDC61	CCD61_MOUSE	57368.2	3	2	0	2	3	3	4	333488	204944	NaN	180762	308842	262400	528648	Q3UJV1	Ccdc61	57368.2		57368.2	Ccdc61	307.759	203.097		175.66	214.775	189.893	339.851	Ccdc61	2.25599	1.21158		1.35363	2.87954	2.40151	3.90224	Q3UJV1	Ccdc61	3	3	248.173	228.838	-0.117016	0.115606	0.396063
Q3TCJ8	Ccdc69	Coiled-coil domain-containing protein 69	CCD69_MOUSE	23296.2	6	5	4	4	5	5	3	890743	777500	714325	565189	599128	587738	367189	Q3TCJ8	Ccdc69	23296.2		23296.2	Ccdc69	2024.27	1897.38	1897	1352.53	1026.01	1047.4	581.297	Ccdc69	14.8387	11.3188	11.2668	10.4225	13.756	13.2461	6.67456	Q3TCJ8	Ccdc69	3	4	884.904	1792.8	1.01862	1.8775	1.95489
Q8VEG0	Ccdc71	Coiled-coil domain-containing protein 71	CCD71_MOUSE	46009.6	6	6	6	5	7	9	10	656720	805830	653752	783023	771090	997008	1.85952e+06	Q8VEG0	Ccdc71	46009.6		46009.6	Ccdc71	755.673	995.714	879.068	948.778	668.615	899.633	1490.55	Ccdc71	5.53938	5.93994	5.22102	7.31122	8.96428	11.3774	17.1148	Q8VEG0	Ccdc71	3	4	1019.6	894.808	-0.188353	0.144768	0.421319
E9Q4T4	Ccdc71l	E9Q4Coiled-coil domain containing 71 like	E9Q4T4_M	24212.7	5	6	5	7	8	8	6	2.8548e+06	2.75084e+06	2.40195e+06	3466229	2001785	1.58219e+06	1.87687e+06	E9Q4T4	Ccdc71l	24212.7		24212.7	Ccdc71l	6242.18	6458.96	6137.34	7980.93	3298.33	2712.88	2858.81	Ccdc71l	45.7577	38.531	36.4513	61.5005	44.2215	34.3089	32.8254	E9Q4T4	Ccdc71l	3	4	2956.67	6704.85	1.18123	3.63305	3.19993
Q9CZH8;Q9CZH8-2	Ccdc77	Coiled-coil domain-containing protein 77;Isoform 2 of Coiled-coil domain-containing protein 77	CCD77_MOUSE	57569.03;57569.03-2	3	0	1	1	4	4	4	354441	NaN	131204	126024	208374	252113	250113	Q9CZH8	Ccdc77	57569		57569	Ccdc77	325.955		141	122.04	144.402	181.812	160.229	Ccdc77	2.38938		0.837435	0.94043	1.93604	2.29931	1.83978	Q9CZH8	Ccdc77	3	3	162.148	196.331	0.275983	0.11076	0.391844
Q6PG04	Ccdc82	Coiled-coil domain-containing protein 82	CCD82_MOUSE	61007.8	3	3	5	4	5	5	4	135842	229635	532971	271203	296182	346297	325429	Q6PG04	Ccdc82	61007.8		61007.8	Ccdc82	117.883	213.989	540.476	247.826	193.684	235.656	196.727	Ccdc82	0.864126	1.27656	3.21003	1.90973	2.59677	2.98026	2.25886	Q6PG04	Ccdc82	3	4	208.689	280.044	0.424297	0.149785	0.425449
Q9JJ89	Ccdc86	Coiled-coil domain-containing protein 86	CCD86_MOUSE	46486.8	17	16	16	16	9	8	9	17131558	17957974	16359175	12620012	2.54691e+06	2.76559e+06	3.22785e+06	Q9JJ89	Ccdc86	46486.8		46486.8	Ccdc86	19510.6	21961.8	21771.6	15134.5	2185.76	2469.87	2560.81	Ccdc86	143.02	131.013	129.307	116.626	29.305	31.2356	29.4037	Q9JJ89	Ccdc86	3	4	2405.48	19594.6	3.02606	5.12284	3.54164	up
Q4QRL3;Q4QRL3-2	Ccdc88b	Coiled-coil domain-containing protein 88B;Isoform 2 of Coiled-coil domain-containing protein 88B	CC88B_MOUSE	166608.45;166608.45-2	23	22	15	17	19	19	18	4385358	5.23006e+06	3039810	2.69696e+06	2.50719e+06	2.71912e+06	5.02218e+06	Q4QRL3	Ccdc88b	166608		166608	Ccdc88b	1393.51	1784.63	1128.78	902.436	600.356	677.559	1111.7	Ccdc88b	10.215	10.6463	6.7041	6.95411	8.04912	8.56886	12.7648	Q4QRL3	Ccdc88b	3	4	796.539	1302.34	0.709287	1.06165	1.24219
Q6VGS5;Q6VGS5-2	Ccdc88c	Protein Daple;Isoform 2 of Protein Daple	DAPLE_MOUSE	226534.78;226534.78-2	27	32	31	27	33	32	28	6.5835e+06	9436615	9819094	6714412	6873153	7.50867e+06	5640708	Q6VGS5	Ccdc88c	226535		226535	Ccdc88c	1538.6	2368.21	2681.61	1652.39	1210.43	1376.08	918.317	Ccdc88c	11.2785	14.1276	15.9268	12.7332	16.2286	17.4028	10.5443	Q6VGS5	Ccdc88c	3	4	1168.28	2060.2	0.818404	1.48859	1.62347
Q8VC31	Ccdc9	Coiled-coil domain-containing protein 9	CCDC9_MOUSE	61445.4	17	16	18	19	18	19	17	15702397	15691017	15975336	15155157	7.7493e+06	7.1316e+06	8506630	Q8VC31	Ccdc9	61445.4		61445.4	Ccdc9	13529.4	14517.8	16084.9	13750.2	5031.44	4818.51	5105.78	Ccdc9	99.176	86.6062	95.5327	105.958	67.4578	60.9381	58.6255	Q8VC31	Ccdc9	3	4	4985.24	14470.6	1.53739	5.43888	3.54164
Q8C3X2	Ccdc90b	Coiled-coil domain-containing protein 90B, mitochondrial	CC90B_MOUSE	29596.8	9	8	7	9	12	11	11	5.14492e+06	3.41277e+06	2.72241e+06	3.1682e+06	5421151	5.19856e+06	2.80016e+06	Q8C3X2	Ccdc90b	29596.8		29596.8	Ccdc90b	9203.15	6555.45	5690.74	5967.7	7307.46	7292.12	3489.26	Ccdc90b	67.4628	39.1066	33.7988	45.9867	97.9729	92.221	40.0643	Q8C3X2	Ccdc90b	3	4	6029.61	6854.26	0.184935	0.277438	0.538396
Q9D8L5	Ccdc91	Coiled-coil domain-containing protein 91	CCD91_MOUSE	50006.8	3	5	4	3	2	2	3	518074	770954	708861	289785	191926	243333	538906	Q9D8L5	Ccdc91	50006.8		50006.8	Ccdc91	548.485	876.473	876.98	323.062	153.117	202.017	397.446	Ccdc91	4.02061	5.22861	5.20862	2.48949	2.05287	2.55484	4.56354	Q9D8L5	Ccdc91	3	4	250.86	656.25	1.38737	1.3327	1.48621
Q7TQK5	Ccdc93	Coiled-coil domain-containing protein 93	CCD93_MOUSE	72603	25	28	28	27	32	32	30	14554063	17738620	15111013	13518130	14698403	14973969	16330356	Q7TQK5	Ccdc93	72603		72603	Ccdc93	10612.9	13890.1	12876.5	10380.1	8076.72	8562.44	8295.35	Ccdc93	77.7964	82.8615	76.4769	79.9882	108.287	108.286	95.2488	Q7TQK5	Ccdc93	3	4	8311.51	11939.9	0.522606	2.03768	2.08673
Q9DBT3	Ccdc97	Coiled-coil domain-containing protein 97	CCD97_MOUSE	38724.3	9	9	10	9	4	6	3	4563653	11305388	11513670	10660831	887493	805545	629326	Q9DBT3	Ccdc97	38724.3		38724.3	Ccdc97	6239.24	16597.5	18394.5	15347.8	914.325	863.618	599.357	Ccdc97	45.7361	99.0124	109.25	118.269	12.2586	10.9219	6.88193	Q9DBT3	Ccdc97	3	4	792.433	14144.8	4.15783	3.53667	3.14244	up
Q8K2I2	Cchcr1	Coiled-coil alpha-helical rod protein 1	CCHCR_MOUSE	87105.4	0	0	2	2	0	0	1	NaN	NaN	44614	43666.8	NaN	NaN	16139.9	Q8K2I2	Cchcr1	87105.4		87105.4	Cchcr1			31.6873	27.9476			6.8336	Cchcr1			0.188199	0.215363			0.0784647	Q8K2I2	Cchcr1	1	2	6.8336	29.8174	2.12544	1.32814	1.48241
Q8K2Y9	Ccm2	Cerebral cavernous malformations protein 2 homolog	CCM2_MOUSE	49917.1	18	19	19	19	24	24	23	10695558	13983473	13665667	11262851	15937081	14112637	18131536	Q8K2Y9	Ccm2	49917.1		49917.1	Ccm2	11343.7	15925.9	16937.1	12578.7	12737.3	11737.5	13396.1	Ccm2	83.1541	95.0064	100.594	96.931	170.772	148.44	153.817	Q8K2Y9	Ccm2	3	4	12623.6	14196.4	0.169397	0.388145	0.638411
Q8K2Y9-2	Ccm2	Isoform 2 of Cerebral cavernous malformations protein 2 homolog	CCM2_MOUSE	48248	1	1	2	1	1	2	1	224502	159873	285742	152612	563923	756545	886548	Q8K2Y9	Ccm2	48248		48248	Ccm2	246.344	188.38	366.398	176.339	466.294	650.984	677.668	Ccm2	1.8058	1.12379	2.17613	1.35885	6.25171	8.23278	7.7811	Q8K2Y9	Ccm2	3	4	598.315	244.365	-1.29187	2.07331	2.11612	down
P51943	Ccna2	Cyclin-A2	CCNA2_MOUSE	47269.1	5	7	10	6	0	0	0	1.92756e+06	2.70585e+06	4253633	1.28209e+06	NaN	NaN	NaN	P51943	Ccna2	47269.1		47269.1	Ccna2	2158.9	3254.36	5567.25	1512.1				Ccna2	15.8256	19.4139	33.0654	11.6521				P51943	Ccna2		4		3123.15				up-a
P24860	Ccnb1	G2/mitotic-specific cyclin-B1	CCNB1_MOUSE	48051.9	0	7	6	3	0	0	0	NaN	1.6227e+06	1.43389e+06	306620	NaN	NaN	NaN	P24860	Ccnb1	48051.9		48051.9	Ccnb1		1919.84	1846.13	355.737				Ccnb1		11.4529	10.9647	2.74129				P24860	Ccnb1		3		1373.91
Q62447	Ccnc	Cyclin-C	CCNC_MOUSE	33240.7	3	3	3	3	3	2	3	1113562	1.20085e+06	1185902	871930	798924	527589	660723	Q62447	Ccnc	33240.7		33240.7	Ccnc	1773.56	2053.8	2207.18	1462.35	958.859	658.932	733.066	Ccnc	13.0009	12.252	13.109	11.2687	12.8557	8.33329	8.4172	Q62447	Ccnc	3	4	783.619	1874.22	1.25807	2.77454	2.65397
P30280	Ccnd2	G1/S-specific cyclin-D2	CCND2_MOUSE	32897.2	4	4	5	7	0	0	0	568146	661253	1.0643e+06	1.13551e+06	NaN	NaN	NaN	P30280	Ccnd2	32897.2		32897.2	Ccnd2	914.33	1142.74	2001.54	1924.29				Ccnd2	6.7024	6.81704	11.8877	14.8285				P30280	Ccnd2		4		1495.73				up-a
P30282	Ccnd3	G1/S-specific cyclin-D3	CCND3_MOUSE	32410.7	2	4	3	1	0	0	0	124558	339308	316977	89041.8	NaN	NaN	NaN	P30282	Ccnd3	32410.7		32410.7	Ccnd3	203.462	595.175	605.058	153.16				Ccnd3	1.49146	3.55052	3.5936	1.18024				P30282	Ccnd3		4		389.214				up-a
Q3TVC7;Q3TVC7-3	Ccndbp1	Cyclin-D1-binding protein 1;Isoform 3 of Cyclin-D1-binding protein 1	CCDB1_MOUSE	39355.87;39355.87-3	0	1	1	1	1	1	1	NaN	257698	412965	294820	117321	114986	144904	Q3TVC7	Ccndbp1	39355.9		39355.9	Ccndbp1		372.255	649.175	417.624	118.929	121.297	135.789	Ccndbp1		2.22069	3.85562	3.21818	1.59451	1.534	1.55915	Q3TVC7	Ccndbp1	3	3	125.338	479.685	1.93626	2.77893	2.65736
Q61457	Ccne1	G1/S-specific cyclin-E1	CCNE1_MOUSE	46986	2	4	4	3	0	0	0	696416	1408692	1.37533e+06	555039	NaN	NaN	NaN	Q61457	Ccne1	46986		46986	Ccne1	784.697	1704.46	1810.91	658.557				Ccne1	5.75214	10.168	10.7555	5.07479				Q61457	Ccne1		4		1239.66				up-a
Q61458	Ccnh	Cyclin-H	CCNH_MOUSE	37506.3	15	16	15	14	8	11	10	7477268	10378103	8.26213e+06	5913214	1.7586e+06	2.5127e+06	3097053	Q61458	Ccnh	37506.3		37506.3	Ccnh	10554.6	15730.9	13628.5	8789.38	1870.6	2781.32	3045.36	Ccnh	77.3693	93.8429	80.943	67.7304	25.0796	35.1745	34.9674	Q61458	Ccnh	3	4	2565.76	12175.8	2.24656	3.26534	2.98144	up
O88874	Ccnk	Cyclin-K	CCNK_MOUSE	61363.3	13	15	13	14	11	12	11	9785022	12601919	11112719	9401810	6.14829e+06	6773497	9017769	O88874	Ccnk	61363.3		61363.3	Ccnk	8442.19	11675.3	11203.9	8541.63	3997.28	4582.68	5419.81	Ccnk	61.8846	69.649	66.543	65.8213	53.5925	57.9556	62.2312	O88874	Ccnk	3	4	4666.59	9965.75	1.09461	2.73194	2.62279
Q52KE7	Ccnl1	Cyclin-L1	CCNL1_MOUSE	60133.2	6	6	5	5	4	5	5	1.87695e+06	2.22716e+06	2146589	1.77849e+06	1.31347e+06	1203586	2468454	Q52KE7	Ccnl1	60133.2		60133.2	Ccnl1	1652.5	2105.6	2208.48	1648.82	871.412	830.956	1513.92	Ccnl1	12.1135	12.561	13.1167	12.7057	11.6832	10.5088	17.3832	Q52KE7	Ccnl1	3	4	1072.1	1903.85	0.828484	1.64736	1.75956
Q9JJA7	Ccnl2	Cyclin-L2	CCNL2_MOUSE	58005.3	14	16	16	13	13	12	13	9228328	10046989	8618648	7.38274e+06	3.13834e+06	3900427	4.96582e+06	Q9JJA7	Ccnl2	58005.3		58005.3	Ccnl2	8422.82	9847.09	9192.42	7095.59	2158.5	2791.64	3157.31	Ccnl2	61.7426	58.7429	54.5962	54.6781	28.9395	35.305	36.2528	Q9JJA7	Ccnl2	3	4	2702.48	8639.48	1.67666	3.61276	3.18512
Q8QZR8	Ccnq	Cyclin-Q	CCNQ_MOUSE	28928.3	1	3	0	3	3	3	2	19083	437508	NaN	330546	526770	563487	292799	Q8QZR8	Ccnq	28928.3		28928.3	Ccnq	34.9241	859.809		637.011	726.468	808.678	373.285	Ccnq	0.256008	5.1292		4.90876	9.73994	10.2271	4.28613	Q8QZR8	Ccnq	3	3	636.144	510.581	-0.317213	0.317093	0.574759
Q9QWV9	Ccnt1	Cyclin-T1	CCNT1_MOUSE	80597.7	20	19	21	19	19	21	20	9729448	11477773	10773805	7.94229e+06	5.48181e+06	5.67796e+06	6249792	Q9QWV9	Ccnt1	80597.7		80597.7	Ccnt1	6390.98	8096.07	8269.98	5493.66	2713.44	2924.72	2859.8	Ccnt1	46.8484	48.2972	49.1176	42.3338	36.3798	36.988	32.8368	Q9QWV9	Ccnt1	3	4	2832.66	7062.67	1.31806	3.21469	2.95196
Q7TQK0	Ccnt2	Cyclin-T2	CCNT2_MOUSE	80251.6	5	4	5	4	2	3	2	715956	504152	920106	808195	338952	459794	406153	Q7TQK0	Ccnt2	80251.6		80251.6	Ccnt2	472.318	357.147	709.32	561.437	168.501	237.862	186.651	Ccnt2	3.46228	2.13057	4.21284	4.3264	2.25914	3.00816	2.14316	Q7TQK0	Ccnt2	3	4	197.671	525.056	1.40937	2.38743	2.36472
Q8BGU5	Ccny	Cyclin-Y	CCNY_MOUSE	39394.8	7	5	6	5	8	7	7	2.85833e+06	1.92826e+06	1.76517e+06	1.41579e+06	1.38607e+06	1.64903e+06	2.72985e+06	Q8BGU5	Ccny	39394.8		39394.8	Ccny	3841.29	2782.7	2772.08	2003.54	1403.68	1737.82	2555.61	Ccny	28.1581	16.6003	16.4641	15.4391	18.8194	21.9776	29.344	Q8BGU5	Ccny	3	4	1899.04	2849.9	0.585646	0.942243	1.13685
Q7TSH4	Ccp110	Centriolar coiled-coil protein of 110 kDa	CP110_MOUSE	111139	0	0	2	1	0	5	0	NaN	NaN	157851	53058.4	NaN	400729	NaN	Q7TSH4	Ccp110	111139		111139	Ccp110			87.8694	26.615		149.692		Ccp110			0.52188	0.205093		1.8931		Q7TSH4	Ccp110	1	2	149.692	57.2422	-1.38685	0.32614	0.582813
O54689	Ccr6	C-C chemokine receptor type 6	CCR6_MOUSE	42102.7	0	0	0	0	2	2	2	NaN	NaN	NaN	NaN	998794	1.12547e+06	1.41949e+06	O54689	Ccr6	42102.7		42102.7	Ccr6					946.423	1109.78	1243.41	Ccr6					12.6889	14.0351	14.2771	O54689	Ccr6	3		1099.87					down-a
Q9WU84	Ccs	Copper chaperone for superoxide dismutase	CCS_MOUSE	28911.6	6	6	4	4	5	4	4	7.10075e+06	7.58731e+06	2.22804e+06	4711231	1733011	750675	11126302	Q9WU84	Ccs	28911.6		28911.6	Ccs	13002.7	14919.6	4767.72	9084.51	2391.38	1077.94	14193	Ccs	95.3152	89.0028	28.3168	70.0046	32.0618	13.6324	162.966	Q9WU84	Ccs	3	4	5887.43	10443.6	0.826914	0.713471	0.932128
Q8QZT2	Ccsap	Centriole, cilia and spindle-associated protein	CCSAP_MOUSE	28378.6	3	3	3	3	6	7	5	810584	647090	710730	749961	1.73473e+06	2.04833e+06	1.81002e+06	Q8QZT2	Ccsap	28378.6		28378.6	Ccsap	1512.2	1296.32	1549.43	1473.28	2438.71	2996.56	2352.26	Ccsap	11.085	7.73322	9.20248	11.353	32.6964	37.8965	27.0091	Q8QZT2	Ccsap	3	4	2595.85	1457.81	-0.832403	3.11912	2.89327	down
P80314	Cct2	T-complex protein 1 subunit beta	TCPB_MOUSE	57477.2	41	41	45	44	46	47	48	713697920	828042048	839260096	615300800	248733808	256329520	300230912	P80314	Cct2	57477.2		57477.2	Cct2	657387	819023	903356	596802	172647	185148	192643	Cct2	4818.9	4885.89	5365.27	4598.92	2314.72	2341.5	2211.96	P80314	Cct2	3	4	183479	744142	2.01996	4.13424	3.42682
P80318	Cct3	T-complex protein 1 subunit gamma	TCPG_MOUSE	60630	44	43	46	45	50	48	48	781010688	1027361792	974949184	714227968	288611200	318314272	402997280	P80318	Cct3	60630		60630	Cct3	681980	963331	994839	656732	189909	217964	245137	Cct3	4999.19	5746.76	5908.62	5060.73	2546.15	2756.51	2814.71	P80318	Cct3	3	4	217670	824221	1.92089	3.57994	3.16712
P80315	Cct4	T-complex protein 1 subunit delta	TCPD_MOUSE	58066.4	38	37	38	37	41	40	43	750132672	917945024	929997120	674204416	269298016	310497568	353276736	P80315	Cct4	58066.4		58066.4	Cct4	683936	898735	990867	647300	185024	221998	224380	Cct4	5013.53	5361.41	5885.02	4988.05	2480.66	2807.53	2576.37	P80315	Cct4	3	4	210467	805209	1.93577	3.7646	3.26815
P80316	Cct5	T-complex protein 1 subunit epsilon	TCPE_MOUSE	59624.1	42	39	44	42	50	50	46	527022080	641611456	608250240	444153056	216231488	227549248	257732240	P80316	Cct5	59624.1		59624.1	Cct5	467961	611772	631130	415288	144683	158442	159419	Cct5	3430.34	3649.54	3748.45	3200.18	1939.8	2003.76	1830.48	P80316	Cct5	3	4	154181	531538	1.78555	3.74225	3.2557
P80317	Cct6a	T-complex protein 1 subunit zeta	TCPZ_MOUSE	58004.3	31	33	33	34	32	35	36	571037120	600720256	579489344	401763328	204730944	213364784	244221568	P80317	Cct6a	58004.3		58004.3	Cct6a	521203	588778	618079	386144	140813	152714	155281	Cct6a	3820.62	3512.37	3670.94	2975.6	1887.91	1931.32	1782.96	P80317	Cct6a	3	4	149603	528551	1.82091	3.72119	3.24544
Q61390	Cct6b	T-complex protein 1 subunit zeta-2	TCPW_MOUSE	58184.8	1	2	2	0	1	2	2	581770	964065	851926	NaN	159094	622400	567820	Q61390	Cct6b	58184.8		58184.8	Cct6b	529.352	941.968	905.839		109.085	444.095	359.911	Cct6b	3.88036	5.61933	5.38002		1.46253	5.61632	4.13257	Q61390	Cct6b	3	3	304.363	792.386	1.38041	1.07335	1.25271
P80313	Cct7	T-complex protein 1 subunit eta	TCPH_MOUSE	59652.2	37	37	41	40	43	45	41	589208896	661025536	630191360	476262208	190772320	187307392	237825616	P80313	Cct7	59652.2		59652.2	Cct7	522932	629987	653589	445101	127588	130360	147037	Cct7	3833.3	3758.2	3881.84	3429.92	1710.6	1648.62	1688.3	P80313	Cct7	3	4	134995	562902	2.05998	4.27099	3.46932
P42932	Cct8	T-complex protein 1 subunit theta	TCPQ_MOUSE	59555.5	41	42	44	42	51	49	51	908454592	1078546944	1021664704	764665856	312560320	316418496	367299840	P42932	Cct8	59555.5		59555.5	Cct8	807577	1.02957e+06	1.06132e+06	715795	209378	220575	227454	Cct8	5919.86	6141.93	6303.44	5515.87	2807.18	2789.53	2611.66	P42932	Cct8	3	4	219135	903565	2.04381	4.19252	3.44468
Q8C1Y8	Ccz1	Vacuolar fusion protein CCZ1 homolog	CCZ1_MOUSE	55504.7	19	21	18	19	21	23	20	11884105	15629228	12028160	10837850	7985447	8.23135e+06	10310247	Q8C1Y8	Ccz1	55504.7		55504.7	Ccz1	11335.4	16008.4	13406.9	10885.6	5739.69	6156.82	6850.67	Ccz1	83.0933	95.4981	79.627	83.8836	76.9534	77.8632	78.6606	Q8C1Y8	Ccz1	3	4	6249.06	12909.1	1.04667	2.84501	2.7046
O35566	Cd151	CD151 antigen	CD151_MOUSE	28246.1	1	1	0	1	0	0	0	45870.5	25761.6	NaN	36343.4	NaN	NaN	NaN	O35566	Cd151	28246.1		28246.1	Cd151	85.9761	51.8506		71.7307				Cd151	0.630239	0.309316		0.552752				O35566	Cd151		3		69.8525
Q62192	Cd180	CD180 antigen	CD180_MOUSE	74302.4	23	24	24	24	28	29	30	108290096	105703056	93157328	100426952	84486288	105949312	135477312	Q62192	Cd180	74302.4		74302.4	Cd180	77159.3	80876.8	77566.2	75350.5	45363.1	59198.5	67244.6	Cd180	565.608	482.472	460.686	580.646	608.194	748.663	772.115	Q62192	Cd180	3	4	57268.7	77738.2	0.440876	1.63434	1.74811
P25918	Cd19	B-lymphocyte antigen CD19	CD19_MOUSE	60149.2	14	14	14	14	13	14	12	40286488	46025076	43925436	36818616	20800718	21657472	27508010	P25918	Cd19	60149.2		60149.2	Cd19	35459.5	43501.5	45179.8	34125.3	13796.5	14948.4	16866.4	Cd19	259.932	259.509	268.335	262.967	184.973	189.047	193.664	P25918	Cd19	3	4	15203.7	39566.5	1.37985	3.72802	3.24814
P11609	Cd1d1	CD1Antigen-presenting glycoprotein CD1d1	CD1D1_MO	38554.1	4	3	2	2	5	5	5	956696	742812	641809	648828	1.37088e+06	1.52439e+06	2.05161e+06	P11609	Cd1d1	38554.1		38554.1	Cd1d1	1313.73	1095.34	1029.9	938.205	1418.56	1641.5	1962.54	Cd1d1	9.63016	6.53426	6.11684	7.22974	19.019	20.7595	22.5343	P11609	Cd1d1	3	4	1674.2	1094.29	-0.613474	1.84816	1.92993
P08920	Cd2	T-cell surface antigen CD2	CD2_MOUSE	38414.6	6	6	7	7	7	7	7	4.38244e+06	4992191	3957764	3736368	5693563	6.54859e+06	7.34146e+06	P08920	Cd2	38414.6		38414.6	Cd2	6039.79	7388.14	6374.01	5422.41	5912.99	7077.29	7048.23	Cd2	44.2741	44.074	37.8569	41.7847	79.277	89.5042	80.9291	P08920	Cd2	3	4	6679.51	6306.09	-0.0829968	0.270924	0.532865
O54901	Cd200	OX-2 membrane glycoprotein	OX2G_MOUSE	31256.1	6	4	3	3	5	6	6	1.86483e+06	1.92697e+06	1.34009e+06	1.0058e+06	2.10675e+06	2.79991e+06	3.4151e+06	O54901	Cd200	31256.1		31256.1	Cd200	3158.7	3504.94	2652.52	1793.98	2689.04	3718.98	4029.61	Cd200	23.1545	20.9088	15.754	13.8243	36.0527	47.0327	46.2687	O54901	Cd200	3	4	3479.21	2777.54	-0.324956	0.541225	0.777414
Q8CJ91;Q8CJ91-2	Cd209b	CD209 antigen-like protein B;Isoform 2 of CD209 antigen-like protein B	C209B_MOUSE	37111.56;37111.56-2	2	9	4	3	3	5	3	521553	5.77759e+06	1.29572e+06	592938	552361	859279	864318	Q8CJ91	Cd209b	37111.6		37111.6	Cd209b	744.032	8850.69	2160.03	890.715	593.79	961.259	858.931	Cd209b	5.45405	52.7989	12.829	6.86379	7.96109	12.1567	9.8624	Q8CJ91	Cd209b	3	4	804.66	3161.37	1.9741	0.592158	0.822685
P35329	Cd22	B-cell receptor CD22	CD22_MOUSE	97180.8	34	33	35	35	38	39	39	175881488	193512512	177279424	159573696	138649040	145935760	182226112	P35329	Cd22	97180.8		97180.8	Cd22	95816.8	113206	112859	91541.7	56918.7	62344.2	69155	Cd22	702.375	675.329	670.299	705.415	763.124	788.447	794.051	P35329	Cd22	3	4	62806	103356	0.718645	2.79111	2.66705
Q9JLQ0	Cd2ap	CD2-associated protein	CD2AP_MOUSE	70449.9	34	33	34	33	37	36	36	61497268	76907112	65150436	55953772	53723420	56540320	70118128	Q9JLQ0	Cd2ap	70449.9		70449.9	Cd2ap	46214.4	62061.9	57213.1	44277.9	30423	33319.1	36706.5	Cd2ap	338.77	370.231	339.804	341.203	407.889	421.375	421.471	Q9JLQ0	Cd2ap	3	4	33482.9	52441.8	0.647295	2.04339	2.09137
Q9CWK3	Cd2bp2	CD2CD2 antigen cytoplasmic tail-binding protein 2	CD2B2_MO	37694.4	12	12	12	12	11	12	10	21450574	24755492	25224004	18877480	9932548	9047807	10427495	Q9CWK3	Cd2bp2	37694.4		37694.4	Cd2bp2	30127.6	37336.5	41399.5	27919.4	10512.4	9965.09	10202.3	Cd2bp2	220.847	222.732	245.883	215.145	140.943	126.025	117.144	Q9CWK3	Cd2bp2	3	4	10226.6	34195.7	1.74149	3.95487	3.35476
Q08857	Cd36	Platelet glycoprotein 4	CD36_MOUSE	52698	3	4	5	4	6	5	6	1.34467e+06	2.07989e+06	2.26988e+06	1.41211e+06	1.8647e+06	1085550	1.62229e+06	Q08857	Cd36	52698		52698	Cd36	1350.9	2243.81	2664.82	1493.87	1411.67	855.207	1135.34	Cd36	9.90265	13.3855	15.8271	11.5117	18.9267	10.8155	13.0362	Q08857	Cd36	3	4	1134.07	1938.35	0.773314	1.14617	1.31898
Q61470	Cd37	Leukocyte antigen CD37	CD37_MOUSE	31852.4	8	9	10	7	9	10	7	63239344	74042408	63093460	49348524	33421180	33913236	37440924	Q61470	Cd37	31852.4		31852.4	Cd37	105111	132153	122546	86371.5	41860	44202.1	43350.9	Cd37	770.504	788.362	727.836	665.573	561.227	559.008	497.763	Q61470	Cd37	3	4	43137.6	111546	1.37061	3.40063	3.06477
P56528	Cd38	ADP-ribosyl cyclase/cyclic ADP-ribose hydrolase 1	CD38_MOUSE	34407.8	13	13	13	13	14	14	14	29041306	34807200	26257246	24853986	48442968	48950544	59308880	P56528	Cd38	34407.8		34407.8	Cd38	44684.9	57511.1	47211.8	40269.6	56168.5	59063	63570.6	Cd38	327.558	343.083	280.403	310.315	753.065	746.95	729.929	P56528	Cd38	3	4	59600.7	47419.3	-0.329853	1.27582	1.4355
P22646	Cd3e	T-cell surface glycoprotein CD3 epsilon chain	CD3E_MOUSE	21393.5	0	1	0	0	0	0	0	NaN	164831	NaN	NaN	NaN	NaN	NaN	P22646	Cd3e	21393.5		21393.5	Cd3e		438.024						Cd3e		2.61304						P22646	Cd3e		1		438.024
P27512	Cd40	Tumor necrosis factor receptor superfamily member 5	TNR5_MOUSE	32092.8	15	15	14	14	12	12	12	47184440	60758800	54877456	48866056	14144590	14373023	18401870	P27512	Cd40	32092.8		32092.8	Cd40	77838.4	107632	105790	84886.5	17583.4	18593.3	21147	Cd40	570.586	642.08	628.316	654.129	235.745	235.143	242.814	P27512	Cd40	3	4	19107.9	94036.7	2.29906	4.62345	3.52857	up
P15379;P15379-10;P15379-11;P15379-2;P15379-3;P15379-4;P15379-5;P15379-6;P15379-7;P15379-8;P15379-9	Cd44	CD44 antigen;Isoform 8 of CD44 antigen;Isoform 9 of CD44 antigen;Isoform 13 of CD44 antigen;Isoform 12 of CD44 antigen;Isoform 4 of CD44 antigen;Isoform 6 of CD44 antigen;Isoform 7 of CD44 antigen;Isoform 2 of CD44 antigen;Isoform 3 of CD44 antigen;Isoform 5 of CD44 antigen	CD44_MOUSE	85617.14;85617.14-10;85617.14-11;85617.14-2;85617.14-3;85617.14-4;85617.14-5;85617.14-6;85617.14-7;85617.14-8;85617.14-9	10	11	11	11	6	6	6	71368808	72151040	79825680	57479384	6.01356e+06	7292319	10602129	P15379	Cd44	85617.1		85617.1	Cd44	44131.6	47909.5	57682	37427.4	2802.14	3536.06	4566.95	Cd44	323.502	285.805	342.589	288.413	37.569	44.7194	52.4385	P15379	Cd44	3	4	3635.05	46787.6	3.68608	4.77734	3.53719	up
Q61735-2	Cd47	Isoform 2 of Leukocyte surface antigen CD47	CD47_MOUSE	35316.9	2	2	2	1	2	3	2	1.84222e+06	2140405	1.0145e+06	1.14763e+06	315353	536359	484086	Q61735	Cd47	35316.9		35316.9	Cd47	2761.6	3445.51	1777.17	1811.59	356.233	630.505	505.515	Cd47	20.2436	20.5542	10.5551	13.96	4.7761	7.97378	5.80442	Q61735	Cd47	3	4	497.418	2448.97	2.29964	2.93629	2.76803	up
Q61735	Cd47	Leukocyte surface antigen CD47	CD47_MOUSE	33097.5	5	5	5	5	4	4	4	28945020	36905436	26060208	28514038	29978784	28929248	34824512	Q61735	Cd47	33097.5		33097.5	Cd47	46300	63392	48712.6	48028.8	36135.8	36287.5	38804.6	Cd47	339.397	378.166	289.317	370.107	484.482	458.916	445.562	Q61735	Cd47	3	4	37076	51608.4	0.477119	1.85211	1.93349
P18181	Cd48	CD48 antigen	CD48_MOUSE	27383.4	8	9	10	9	13	13	12	18182270	23002022	19311626	17704068	8821333	9970967	11000798	P18181	Cd48	27383.4		27383.4	Cd48	35153	47754.9	43630.4	36043.3	12851.9	15117	14816	Cd48	257.686	284.882	259.133	277.747	172.308	191.179	170.12	P18181	Cd48	3	4	14261.6	40645.4	1.51096	3.89961	3.32972
P13379	Cd5	T-cell surface glycoprotein CD5	CD5_MOUSE	53849.2	0	2	0	0	0	0	0	NaN	326988	NaN	NaN	NaN	NaN	NaN	P13379	Cd5	53849.2		53849.2	Cd5		345.217						Cd5		2.0594						P13379	Cd5		1		345.217
Q61451	Cd53	Leukocyte surface antigen CD53	CD53_MOUSE	24163.8	1	1	0	1	1	1	1	8.01756e+06	8789193	NaN	7696398	3607487	3260581	3.6973e+06	Q61451	Cd53	24163.8		24163.8	Cd53	17566.3	20678.7		17756.7	5956.07	5602.04	5643.05	Cd53	128.768	123.359		136.832	79.8544	70.8471	64.7945	Q61451	Cd53	3	3	5733.72	18667.2	1.70297	4.51695	3.50698
Q61475	Cd55	Complement decay-accelerating factor, GPI-anchored	DAF1_MOUSE	42617.8	9	11	10	10	14	13	14	4745715	13401570	9800389	8239649	16283361	13320304	19526920	Q61475	Cd55	42617.8		42617.8	Cd55	5895.39	17877.4	14226.9	10778.4	15243.1	12975.9	16898	Cd55	43.2156	106.648	84.4974	83.058	204.367	164.102	194.026	Q61475	Cd55	3	4	15039	12194.5	-0.302475	0.424494	0.670978
Q61476	Cd55b	Complement decay-accelerating factor transmembrane isoform	DAF2_MOUSE	44510.5	0	0	0	0	1	1	1	NaN	NaN	NaN	NaN	296092	158904	246291	Q61476	Cd55b	44510.5		44510.5	Cd55b					265.389	148.213	204.07	Cd55b					3.55814	1.8744	2.34317	Q61476	Cd55b	3		205.891					down-a
P37217	Cd69	Early activation antigen CD69	CD69_MOUSE	22517.3	11	10	11	10	0	0	1	26282610	20865868	23469188	15563937	NaN	NaN	15403.8	P37217	Cd69	22517.3		22517.3	Cd69	61795.1	52681.6	64482.2	38533.7			25.2293	Cd69	452.983	314.273	382.977	296.938			0.289687	P37217	Cd69	1	4	25.2293	54373.2	11.0736	4.06038	3.39531	up
P21855	Cd72	B-cell differentiation antigen CD72	CD72_MOUSE	40347.5	12	12	14	12	17	16	17	13665572	13875402	10943172	9096253	11932518	12828536	15951365	P21855	Cd72	40347.5		40347.5	Cd72	17931.4	19551	16779.7	12568.5	11798.7	13200.1	14580.6	Cd72	131.444	116.632	99.6594	96.8523	158.188	166.937	167.417	P21855	Cd72	3	4	13193.1	16707.7	0.340723	0.893598	1.09337
P04441	Cd74	H-2 class II histocompatibility antigen gamma chain	HG2A_MOUSE	31557.4	17	17	18	17	19	18	19	940418048	1042875840	881300224	767068736	432955648	480424448	593222912	P04441	Cd74	31557.4		31557.4	Cd74	1.57769e+06	1.87876e+06	1.72775e+06	1.3551e+06	547345	632032	693282	Cd74	11565.1	11207.7	10261.6	10442.3	7338.39	7993.09	7960.4	P04441	Cd74	3	4	624220	1.63482e+06	1.38901	3.66684	3.21686
P04441-2	Cd74	Isoform Short of H-2 class II histocompatibility antigen gamma chain	HG2A_MOUSE	24454.4	2	2	2	2	2	2	2	81594360	90188496	81187312	78632352	71214992	63680272	69459424	P04441	Cd74	24454.4		24454.4	Cd74	176647	209669	205395	179260	116181	108109	104753	Cd74	1294.89	1250.78	1219.89	1381.36	1557.66	1367.22	1202.8	P04441	Cd74	3	4	109681	192742	0.81336	3.67378	3.22075
P11911	Cd79a	B-cell antigen receptor complex-associated protein alpha chain	CD79A_MOUSE	24583.1	9	9	10	10	11	10	11	122203072	143539664	103299976	104882352	115744128	83033632	111464568	P11911	Cd79a	24583.1		24583.1	Cd79a	263177	331952	259969	237851	187837	140227	167222	Cd79a	1929.19	1980.26	1544.03	1832.86	2518.38	1773.41	1920.08	P11911	Cd79a	3	4	165096	273237	0.726852	2.22	2.23135
P15530	Cd79b	B-cell antigen receptor complex-associated protein beta chain	CD79B_MOUSE	25726.4	4	4	4	4	5	5	5	105923144	103616016	89258016	86273064	54441272	58214592	72122664	P15530	Cd79b	25726.4		25726.4	Cd79b	217979	228974	214648	186954	84424.4	93943.7	103392	Cd79b	1597.87	1365.95	1274.85	1440.65	1131.9	1188.07	1187.16	P15530	Cd79b	3	4	93920	212139	1.1755	4.05706	3.39468
P35762	Cd81	CD81 antigen	CD81_MOUSE	25814.5	4	4	4	3	3	3	3	5711846	6.57778e+06	6.96758e+06	5730551	4332091	5580276	7252385	P35762	Cd81	25814.5		25814.5	Cd81	11714.3	14486.2	16698.4	12375.7	6695.03	8974.43	10361.2	Cd81	85.8701	86.4177	99.1765	95.3665	89.7619	113.497	118.969	P35762	Cd81	3	4	8676.89	13818.7	0.671368	1.66308	1.77306
P40237	Cd82	CD82 antigen	CD82_MOUSE	29628.5	5	5	6	5	6	6	6	17687086	24796208	23836084	17244766	4675151	5.944e+06	7.08353e+06	P40237	Cd82	29628.5		29628.5	Cd82	31604.5	47579	49771.8	32447.9	6295.13	8328.84	8817.26	Cd82	231.673	283.833	295.608	250.041	84.4004	105.332	101.241	P40237	Cd82	3	4	7813.75	40350.8	2.36851	3.70641	3.23565	up
O88324	Cd83	CD83 antigen	CD83_MOUSE	21312.6	5	5	5	5	0	0	3	10672805	9647203	9299497	9003441	NaN	NaN	314415	O88324	Cd83	21312.6		21312.6	Cd83	26512.1	25733.9	26994.9	23551.1			544.078	Cd83	194.345	153.516	160.33	181.483			6.24721	O88324	Cd83	1	4	544.078	25698	5.5617	4.92273	3.54164	up
Q18PI6	Cd84	SLAM family member 5	SLAF5_MOUSE	37378	8	9	9	8	12	12	11	10730007	11911033	11798272	9828643	5853942	5.84978e+06	7532539	Q18PI6	Cd84	37378		37378	Cd84	15198	18116.5	19528.1	14659.4	6248.15	6497.4	7432.23	Cd84	111.407	108.074	115.983	112.964	83.7706	82.1704	85.3383	Q18PI6	Cd84	3	4	6725.93	16875.5	1.32713	3.74352	3.25587
P42082;P42082-2	Cd86	T-lymphocyte activation antigen CD86;Isoform 2 of T-lymphocyte activation antigen CD86	CD86_MOUSE	34665.72;34665.72-2	7	7	7	6	2	3	2	19016418	16462270	16610183	15572550	290474	261755	242448	P42082	Cd86	34665.7		34665.7	Cd86	29042.3	26997.8	29643.7	25043.7	334.292	313.48	257.937	Cd86	212.891	161.056	176.062	192.985	4.48193	3.96447	2.96168	P42082	Cd86	3	4	301.903	27681.9	6.51871	7.4996	3.9397	up
P40240	Cd9	CD9 antigen	CD9_MOUSE	25258	0	1	0	0	0	0	0	NaN	362412	NaN	NaN	NaN	NaN	NaN	P40240	Cd9	25258		25258	Cd9		815.725						Cd9		4.86622						P40240	Cd9		1		815.725
Q8CC12;Q8CC12-2	Cdan1	Codanin-1;Isoform 2 of Codanin-1	CDAN1_MOUSE	135882.62;135882.62-2	7	12	13	11	14	15	17	1524603	2.56536e+06	2.80333e+06	1.8373e+06	4.16336e+06	2.14207e+06	3.57396e+06	Q8CC12	Cdan1	135883		135883	Cdan1	594.012	1073.31	1276.34	753.797	1222.36	654.463	970.018	Cdan1	4.35434	6.40283	7.58055	5.80871	16.3885	8.27677	11.1379	Q8CC12	Cdan1	3	4	948.947	924.365	-0.037865	0.0514904	0.340088
Q8CII2	Cdc123	Cell division cycle protein 123 homolog	CD123_MOUSE	38816.3	12	12	12	12	11	10	10	13419949	16141541	15141843	12180108	2.12846e+06	1.9324e+06	2.49644e+06	Q8CII2	Cdc123	38816.3		38816.3	Cdc123	18303.7	23641.2	24133.7	17493.5	2187.61	2066.8	2371.93	Cdc123	134.173	141.032	143.336	134.803	29.3298	26.1381	27.2349	Q8CII2	Cdc123	3	4	2208.78	20893	3.2417	5.37824	3.54164	up
Q8R349	Cdc16	Cell division cycle protein 16 homolog	CDC16_MOUSE	71460.2	20	22	19	20	20	19	20	14040968	13955389	12261072	10599794	6.67559e+06	6.76925e+06	7901116	Q8R349	Cdc16	71460.2		71460.2	Cdc16	10402.4	11102.4	10615.1	8269.35	3726.87	3932.71	4077.72	Cdc16	76.254	66.2315	63.0457	63.7231	49.9671	49.7356	46.8212	Q8R349	Cdc16	3	4	3912.43	10097.3	1.36783	4.08486	3.40521
Q9JJ66	Cdc20	Cell division cycle protein 20 homolog	CDC20_MOUSE	54815.8	0	2	2	0	0	0	0	NaN	141227	184012	NaN	NaN	NaN	NaN	Q9JJ66	Cdc20	54815.8		54815.8	Cdc20		146.471	207.682					Cdc20		0.873776	1.23348					Q9JJ66	Cdc20		2		177.076
Q8BGZ4	Cdc23	Cell division cycle protein 23 homolog	CDC23_MOUSE	68561.6	23	24	25	22	26	25	27	15393134	18759858	18956116	14066378	9734425	10818280	13975508	Q8BGZ4	Cdc23	68561.6		68561.6	Cdc23	11886.4	15555.7	17105.2	11437.7	5664.33	6550.78	7517.63	Cdc23	87.1317	92.7975	101.592	88.1384	75.9431	82.8455	86.3188	Q8BGZ4	Cdc23	3	4	6577.58	13996.2	1.08941	2.56667	2.50037
Q99JP4	Cdc26	Anaphase-promoting complex subunit CDC26	CDC26_MOUSE	9760.89	3	3	4	4	4	6	4	710785	887027	559879	596530	366053	686628	533989	Q99JP4	Cdc26	9760.89		9760.89	Cdc26	3855.24	5166.38	3548.65	3407.08	1496.14	2920.43	2017.61	Cdc26	28.2604	30.8201	21.0764	26.2547	20.0592	36.9337	23.1666	Q99JP4	Cdc26	3	4	2144.73	3994.34	0.897161	1.662	1.77225
A2A6Q5;A2A6Q5-3	Cdc27	Cell division cycle protein 27 homolog;Isoform 3 of Cell division cycle protein 27 homolog	CDC27_MOUSE	91842.42;91842.42-3	16	16	18	14	11	12	11	5.45789e+06	5598372	6040352	3.85395e+06	1.41451e+06	1.75561e+06	2.11196e+06	A2A6Q5	Cdc27	91842.4		91842.4	Cdc27	3146.18	3465.44	4068.9	2339.38	614.444	793.596	848.078	Cdc27	23.0627	20.6731	24.1663	18.0271	8.238	10.0363	9.73779	A2A6Q5	Cdc27	3	4	752.039	3254.97	2.11377	3.56559	3.15706
A2A6Q5-2	Cdc27	Isoform 2 of Cell division cycle protein 27 homolog	CDC27_MOUSE	92405.1	0	0	0	0	1	1	1	NaN	NaN	NaN	NaN	31502.3	70526.9	81120.8	A2A6Q5	Cdc27	92405.1		92405.1	Cdc27					13.6008	31.6865	32.3765	Cdc27					0.18235	0.400728	0.371753	A2A6Q5	Cdc27	3		25.8879					down-a
Q8CFI2	Cdc34	UB2Ubiquitin-conjugating enzyme E2 R1	UB2R1_MO	26621.7	7	7	7	8	5	6	4	9188965	11971969	12434463	9479781	2.05805e+06	2.24652e+06	1.95351e+06	Q8CFI2	Cdc34	26621.7		26621.7	Cdc34	18274	25566.4	28896.8	19851.9	3084.18	3503.41	2706.29	Cdc34	133.956	152.517	171.626	152.977	41.3503	44.3064	31.0741	Q8CFI2	Cdc34	3	4	3097.96	23147.3	2.90145	4.50116	3.50698	up
Q61081	Cdc37	Hsp90 co-chaperone Cdc37	CDC37_MOUSE	44593.4	18	17	21	17	23	25	24	105370192	112121040	112108928	94032600	40744376	41572952	43398132	Q61081	Cdc37	44593.4		44593.4	Cdc37	125098	142941	155535	117556	36451.6	38704	35891.7	Cdc37	917.016	852.715	923.763	905.882	488.715	489.476	412.115	Q61081	Cdc37	3	4	37015.7	135282	1.86976	4.84788	3.54164
Q9CZP7;Q9CZP7-2;Q9CZP7-3;Q9CZP7-4	Cdc37l1	Hsp90 co-chaperone Cdc37-like 1;Isoform 2 of Hsp90 co-chaperone Cdc37-like 1;Isoform 3 of Hsp90 co-chaperone Cdc37-like 1;Isoform 4 of Hsp90 co-chaperone Cdc37-like 1	CD37L_MOUSE	38439.21;38439.21-2;38439.21-3;38439.21-4	5	5	5	5	6	4	4	1.31675e+06	1.38448e+06	1.49855e+06	1.30391e+06	809860	1.0146e+06	1058081	Q9CZP7	Cdc37l1	38439.2		38439.2	Cdc37l1	1813.56	2047.63	2411.88	1891.09	840.532	1095.81	1015.17	Cdc37l1	13.2941	12.2151	14.3248	14.5726	11.2692	13.8584	11.6564	Q9CZP7	Cdc37l1	3	4	983.837	2041.04	1.05281	3.13214	2.90091
Q9DC48	Cdc40	Pre-mRNA-processing factor 17	PRP17_MOUSE	65461.2	31	33	32	35	37	34	36	31517636	41799676	34182276	30476062	23457116	22236418	28367304	Q9DC48	Cdc40	65461.2		65461.2	Cdc40	25490.1	36301.8	32305.4	25954.5	14295.8	14102.5	15981.9	Cdc40	186.853	216.559	191.871	200.004	191.668	178.35	183.507	Q9DC48	Cdc40	3	4	14793.4	30013	1.02063	2.89536	2.73875
P60766	Cdc42	Cell division control protein 42 homolog	CDC42_MOUSE	21258.6	9	11	10	9	14	11	14	298846400	357459168	287902816	262996288	227511440	233043072	288345792	P60766	Cdc42	21258.6		21258.6	Cdc42	744245	955941	837856	689689	426960	455110	500233	Cdc42	5455.61	5702.68	4976.25	5314.7	5724.36	5755.63	5743.77	P60766	Cdc42	3	4	460768	806933	0.808408	2.7271	2.61975
P60766-1	Cdc42	Isoform 1 of Cell division control protein 42 homolog	CDC42_MOUSE	21310.6	2	2	2	2	2	2	2	1.28566e+06	1.68108e+06	1.29389e+06	1.18628e+06	934115	843792	1.20576e+06	P60766	Cdc42	21310.6		21310.6	Cdc42	3193.97	4484.69	3756.28	3103.35	1748.73	1643.82	2086.69	Cdc42	23.4131	26.7535	22.3096	23.9142	23.4457	20.7889	23.9598	P60766	Cdc42	3	4	1826.42	3634.57	0.99277	2.68057	2.58605
Q8BHL7	Cdc42se1	C42CDC42 small effector protein 1	C42S1_MO	9076.48	0	0	1	2	2	2	0	NaN	NaN	173473	191681	156725	115103	NaN	Q8BHL7	Cdc42se1	9076.48		9076.48	Cdc42se1			1182.42	1177.33	688.874	526.483		Cdc42se1			7.02271	9.07246	9.23591	6.65825		Q8BHL7	Cdc42se1	2	2	607.679	1179.88	0.957257	1.4235	1.56577
Q8BGH7	Cdc42se2	C42CDC42 small effector protein 2	C42S2_MO	9223.49	2	2	2	2	2	2	2	4534526	5596395	5.38906e+06	4.91004e+06	2.90455e+06	3.30964e+06	3816184	Q8BGH7	Cdc42se2	9223.49		9223.49	Cdc42se2	26027.9	34494.7	36147.3	29677.6	12563.3	14897.1	15259.1	Cdc42se2	190.795	205.779	214.689	228.693	168.439	188.398	175.207	Q8BGH7	Cdc42se2	3	4	14239.8	31586.9	1.1494	3.24326	2.97049
Q9Z1X9	Cdc45	Cell division control protein 45 homolog	CDC45_MOUSE	65384.3	9	12	12	10	0	0	0	2777158	5.26707e+06	5.27095e+06	2.57872e+06	NaN	NaN	NaN	Q9Z1X9	Cdc45	65384.3		65384.3	Cdc45	2248.69	4579.68	4987.39	2198.72				Cdc45	16.4838	27.3201	29.6215	16.9432				Q9Z1X9	Cdc45		4		3503.62				up-a
Q6A068	Cdc5l	Cell division cycle 5-like protein	CDC5L_MOUSE	92189.5	44	43	47	44	54	55	54	120106400	136426464	124059656	101922600	77322888	91012584	109729800	Q6A068	Cdc5l	92189.5		92189.5	Cdc5l	68974.2	84131.1	83254.4	61635	33461.5	40986	43897.2	Cdc5l	505.608	501.885	494.47	474.955	448.627	518.336	504.036	Q6A068	Cdc5l	3	4	39448.2	74498.7	0.917255	2.61154	2.53632
O89033	Cdc6	Cell division control protein 6 homolog	CDC6_MOUSE	62613.7	3	7	10	3	0	0	0	406870	1576239	2.20065e+06	280495	NaN	NaN	NaN	O89033	Cdc6	62613.7		62613.7	Cdc6	344.024	1431.17	2174.41	249.743				Cdc6	2.52183	8.53768	12.9144	1.9245				O89033	Cdc6		4		1049.84				up-a
Q9Z0H0;Q9Z0H0-2	Cdc7	Cell division cycle 7-related protein kinase;Isoform 2 of Cell division cycle 7-related protein kinase	CDC7_MOUSE	62769.53;62769.53-2	2	4	3	0	0	0	0	23670.1	905447	150770	NaN	NaN	NaN	NaN	Q9Z0H0	Cdc7	62769.5		62769.5	Cdc7	19.9643	820.075	148.602					Cdc7	0.146346	4.89217	0.882587					Q9Z0H0	Cdc7		3		329.547
Q8JZM7	Cdc73	Parafibromin	CDC73_MOUSE	60576.6	34	33	32	33	37	36	37	51734852	56654736	48482928	42829964	29566946	30185176	39943284	Q8JZM7	Cdc73	60576.6		60576.6	Cdc73	45214.8	53170.5	49515.6	39416.8	19472.5	20687.3	24318.3	Cdc73	331.442	317.189	294.087	303.743	261.072	261.626	279.227	Q8JZM7	Cdc73	3	4	21492.7	46829.4	1.12357	3.36519	3.04359
Q14B71	Cdca2	Cell division cycle-associated protein 2	CDCA2_MOUSE	106366	3	5	6	3	0	0	0	358031	660820	892859	351384	NaN	NaN	NaN	Q14B71	Cdca2	106366		106366	Cdca2	178.205	353.199	519.324	184.169				Cdca2	1.30631	2.10701	3.0844	1.4192				Q14B71	Cdca2		4		308.724				up-a
Q9CPY3	Cdca5	Sororin	CDCA5_MOUSE	28991.3	2	4	4	2	0	0	0	580904	1.32614e+06	1.52128e+06	439917	NaN	NaN	NaN	Q9CPY3	Cdca5	28991.3		28991.3	Cdca5	1060.81	2600.53	3246.38	845.943				Cdca5	7.77619	15.5135	19.2811	6.51878				Q9CPY3	Cdca5		4		1938.42				up-a
Q9D0M2	Cdca7	Cell division cycle-associated protein 7	CDCA7_MOUSE	43837.3	11	14	13	12	2	2	2	6.91419e+06	7581138	8358877	5900591	170105	208889	305697	Q9D0M2	Cdca7	43837.3		43837.3	Cdca7	8350.26	9831.73	11796.8	7503.95	154.808	197.827	257.183	Cdca7	61.2107	58.6513	70.0641	57.825	2.07555	2.50185	2.95302	Q9D0M2	Cdca7	3	4	203.273	9370.67	5.52667	5.50637	3.54351	up
Q922M5	Cdca7l	Cell division cycle-associated 7-like protein	CDA7L_MOUSE	50248.3	7	7	6	7	0	0	0	3.00289e+06	3.59583e+06	3.49634e+06	2.42331e+06	NaN	NaN	NaN	Q922M5	Cdca7l	50248.3		50248.3	Cdca7l	3163.89	4068.34	4304.78	2688.61				Cdca7l	23.1926	24.2697	25.5673	20.7182				Q922M5	Cdca7l		4		3556.4				up-a
Q8BHX3	Cdca8	Borealin	BOREA_MOUSE	32214	2	6	6	3	0	0	0	376594	2.59475e+06	2448875	300737	NaN	NaN	NaN	Q8BHX3	Cdca8	32214		32214	Cdca8	618.914	4579.2	4703.06	520.451				Cdca8	4.53689	27.3173	27.9327	4.01056				Q8BHX3	Cdca8		4		2605.41				up-a
Q9R100	Cdh17	Cadherin-17	CAD17_MOUSE	91645.4	4	2	2	3	4	6	3	806348	733754	531791	558115	318807	578265	645163	Q9R100	Cdh17	91645.4		91645.4	Cdh17	465.816	455.176	358.995	339.509	138.783	261.958	259.629	Cdh17	3.41462	2.71536	2.13217	2.61624	1.8607	3.31289	2.98111	Q9R100	Cdh17	3	4	220.123	404.874	0.879162	1.61869	1.73521
Q3U4G0;Q3U4G0-2	Cdin1	CDAN1-interacting nuclease 1;Isoform 2 of CDAN1-interacting nuclease 1	CDIN1_MOUSE	32112.8;32112.8-2	1	2	1	1	1	0	0	142864	259506	112117	85987	67069.9	NaN	NaN	Q3U4G0	Cdin1	32112.8		32112.8	Cdin1	235.53	459.419	215.999	149.277	83.3237			Cdin1	1.72653	2.74067	1.28287	1.15032	1.11714			Q3U4G0	Cdin1	1	4	83.3237	265.056	1.6695	0.874655	1.07638
Q8VDP6	Cdipt	CDP-diacylglycerol--inositol 3-phosphatidyltransferase	CDIPT_MOUSE	23598.9	5	5	5	5	6	5	5	25593920	29060984	23344528	19861794	23619698	22938226	33709364	Q8VDP6	Cdipt	23598.9		23598.9	Cdipt	57417.9	70009.7	61200	46920.8	39930.2	40353.7	52680.8	Cdipt	420.896	417.644	363.483	361.568	535.354	510.34	604.891	Q8VDP6	Cdipt	3	4	44321.6	58887.1	0.409942	1.14037	1.31383
P11440	Cdk1	Cyclin-dependent kinase 1	CDK1_MOUSE	34106.6	10	14	15	11	0	0	0	10660311	31177694	28107428	15101778	NaN	NaN	NaN	P11440	Cdk1	34106.6		34106.6	Cdk1	16547.6	51969.1	50984.9	24684.7				Cdk1	121.3	310.023	302.813	190.219				P11440	Cdk1		4		36046.6				up-a
Q3UMM4	Cdk10	Cyclin-dependent kinase 10	CDK10_MOUSE	40960.9	2	5	4	0	4	5	5	202134	1.06715e+06	775449	NaN	810217	669651	846286	Q3UMM4	Cdk10	40960.9		40960.9	Cdk10	261.259	1481.13	1171.23		789.134	678.725	761.975	Cdk10	1.91513	8.83572	6.95624		10.5801	8.58361	8.74914	Q3UMM4	Cdk10	3	3	743.278	971.207	0.385877	0.0213665	0.314435
P24788	Cdk11b	Cyclin-dependent kinase 11B	CD11B_MOUSE	91513.4	31	31	32	28	28	30	31	49554420	53546960	51410108	40332468	23884102	25723940	31195804	P24788	Cdk11b	91513.4		91513.4	Cdk11b	28668.2	33265.1	34755.4	24570.2	10412.2	11669.9	12572	Cdk11b	210.149	198.444	206.421	189.336	139.599	147.586	144.354	P24788	Cdk11b	3	4	11551.4	30314.7	1.39195	3.60315	3.17902
Q14AX6;Q14AX6-3	Cdk12	Cyclin-dependent kinase 12;Isoform 3 of Cyclin-dependent kinase 12	CDK12_MOUSE	163681.29;163681.29-3	26	27	24	22	23	22	22	7.71373e+06	8766661	7686313	6.27429e+06	5157429	4749307	5.97919e+06	Q14AX6	Cdk12	163681		163681	Cdk12	2494.98	3044.91	2905.21	2137	1257.05	1204.61	1347.22	Cdk12	18.2892	18.1645	17.2548	16.4676	16.8536	15.2343	15.469	Q14AX6	Cdk12	3	4	1269.63	2645.53	1.05915	3.13581	2.90353
Q69ZA1	Cdk13	Cyclin-dependent kinase 13	CDK13_MOUSE	164553	41	41	36	38	39	42	41	33673512	41735188	15762272	28400090	25619250	26732528	30987930	Q69ZA1	Cdk13	164553		164553	Cdk13	10833.9	14419	5926.14	9621.72	6211.26	6744.5	6945.14	Cdk13	79.4169	86.017	35.1969	74.1443	83.276	85.2954	79.7453	Q69ZA1	Cdk13	3	4	6633.63	10200.2	0.620726	0.841423	1.04711
Q8K0D0	Cdk17	Cyclin-dependent kinase 17	CDK17_MOUSE	59506.1	16	13	15	13	13	17	13	4849631	5.50573e+06	4.58653e+06	3.30305e+06	2.56852e+06	3.0314e+06	3126887	Q8K0D0	Cdk17	59506.1		59506.1	Cdk17	4314.69	5260.09	4768.49	3094.51	1722.03	2114.94	1937.96	Cdk17	31.6284	31.3791	28.3213	23.8461	23.0876	26.7469	22.252	Q8K0D0	Cdk17	3	4	1924.97	4359.44	1.17931	2.57442	2.50683
Q8BWD8	Cdk19	Cyclin-dependent kinase 19	CDK19_MOUSE	56570	7	10	6	7	9	12	8	1.37611e+06	1.94914e+06	902868	934282	1.41277e+06	1.85828e+06	1.95306e+06	Q8BWD8	Cdk19	56570		56570	Cdk19	1287.86	1958.82	987.407	920.725	996.329	1363.76	1273.27	Cdk19	9.44053	11.6854	5.86448	7.09505	13.358	17.2471	14.62	Q8BWD8	Cdk19	3	4	1211.12	1288.7	0.0895754	0.0392176	0.329597
P97377;P97377-2	Cdk2	Cyclin-dependent kinase 2;Isoform CDK2-alpha of Cyclin-dependent kinase 2	CDK2_MOUSE	38978.29;38978.29-2	17	16	17	15	17	17	16	20805284	30031042	32724938	22385812	11992452	11593866	14512287	P97377	Cdk2	38978.3		38978.3	Cdk2	28258.8	43801.3	51941.5	32017.6	12274.5	12348.7	13731.1	Cdk2	207.148	261.297	308.494	246.725	164.567	156.17	157.664	P97377	Cdk2	3	4	12784.8	39004.8	1.60922	2.87854	2.72739
O35207	Cdk2ap1	Cyclin-dependent kinase 2-associated protein 1	CDKA1_MOUSE	12354	3	3	3	3	2	3	2	2.19137e+06	2.90189e+06	3.06248e+06	782432	339239	582612	651866	O35207	Cdk2ap1	12354		12354	Cdk2ap1	9391.01	13354.1	15336.5	3530.85	1095.52	1957.89	1946.01	Cdk2ap1	68.8398	79.664	91.0875	27.2085	14.6879	24.7608	22.3445	O35207	Cdk2ap1	3	4	1666.47	10403.1	2.64214	2.02103	2.07285	up
P30285	Cdk4	Cyclin-dependent kinase 4	CDK4_MOUSE	33750.8	14	16	17	17	10	10	9	13657817	20080904	20038584	15724854	1689883	2.13321e+06	1774711	P30285	Cdk4	33750.8		33750.8	Cdk4	21423.9	33825	36731.7	25974.1	1997.52	2624	1939.26	Cdk4	157.046	201.784	218.159	200.155	26.7812	33.1849	22.267	P30285	Cdk4	3	4	2186.93	29488.7	3.75318	4.69368	3.53117	up
P49615	Cdk5	Cyclin-dependent kinase 5	CDK5_MOUSE	33288.5	13	12	11	12	12	13	14	7.5892e+06	8044894	6.00627e+06	6.31292e+06	6683159	7.39952e+06	9904304	P49615	Cdk5	33288.5		33288.5	Cdk5	12069.9	13739.3	11162.7	10572.4	8009.53	9228.37	10973	Cdk5	88.4774	81.9623	66.2983	81.4704	107.386	116.708	125.994	P49615	Cdk5	3	4	9403.62	11886.1	0.337987	1.17736	1.34759
Q8BTW8	Cdk5rap1	CK5Mitochondrial tRNA methylthiotransferase CDK5RAP1	CK5P1_MO	66109.5	6	6	4	4	2	2	2	1.31416e+06	1.9748e+06	1.42532e+06	1.22677e+06	330522	404879	711926	Q8BTW8	Cdk5rap1	66109.5		66109.5	Cdk5rap1	1052.41	1698.24	1333.85	1034.52	199.46	254.259	397.159	Cdk5rap1	7.71458	10.1309	7.9221	7.97191	2.67421	3.21553	4.56025	Q8BTW8	Cdk5rap1	3	4	283.626	1279.75	2.1738	3.03896	2.84098
Q8K389	Cdk5rap2	CK5CDK5 regulatory subunit-associated protein 2	CK5P2_MO	205945	25	25	27	27	33	37	32	5228372	5675707	5.73936e+06	4942209	4.7022e+06	5.08918e+06	5.28445e+06	Q8K389	Cdk5rap2	205945		205945	Cdk5rap2	1344.06	1566.78	1724.14	1337.85	910.897	1025.92	946.33	Cdk5rap2	9.85248	9.34666	10.2401	10.3094	12.2126	12.9744	10.8659	Q8K389	Cdk5rap2	3	4	961.048	1493.21	0.635734	2.57537	2.50753
Q99LM2	Cdk5rap3	CK5CDK5 regulatory subunit-associated protein 3	CK5P3_MO	56990.8	18	21	22	19	24	24	24	14098860	18121086	15162987	11930048	9610315	9303904	13146239	Q99LM2	Cdk5rap3	56990.8		56990.8	Cdk5rap3	13097.3	18076.7	16460.3	11670.1	6727.48	6777.6	8507.28	Cdk5rap3	96.0084	107.837	97.7623	89.9294	90.1969	85.714	97.6822	Q99LM2	Cdk5rap3	3	4	7337.45	14826.1	1.01479	2.43128	2.39883
Q64261	Cdk6	Cyclin-dependent kinase 6	CDK6_MOUSE	37028.4	14	15	15	13	10	9	10	6696618	9225185	8495040	6152417	2.49723e+06	2.26595e+06	2.94502e+06	Q64261	Cdk6	37028.4		37028.4	Cdk6	9574.66	14163.8	14193.5	9262.96	2690.57	2540.57	2933.24	Cdk6	70.186	84.4944	84.2989	71.3798	36.0731	32.1298	33.68	Q64261	Cdk6	3	4	2721.46	11798.7	2.11618	3.77423	3.27047
Q03147	Cdk7	Cyclin-dependent kinase 7	CDK7_MOUSE	38968.3	17	18	18	16	13	14	14	14795617	17840654	16222423	13045549	5028363	5494510	7.04444e+06	Q03147	Cdk7	38968.3		38968.3	Cdk7	20101.3	26027.9	25755.1	18663.3	5147.95	5853.73	6666.98	Cdk7	147.35	155.27	152.966	143.818	69.0198	74.0302	76.5514	Q03147	Cdk7	3	4	5889.55	22636.9	1.94245	4.02523	3.38199
Q8R3L8;Q8R3L8-3	Cdk8	Cyclin-dependent kinase 8;Isoform 3 of Cyclin-dependent kinase 8	CDK8_MOUSE	53209.7;53209.7-3	7	8	6	7	6	6	6	2653357	2.91987e+06	3.06209e+06	1.71732e+06	2336184	2199146	2662716	Q8R3L8	Cdk8	53209.7		53209.7	Cdk8	2640.02	3119.69	3560.29	1799.28	1751.6	1715.85	1845.56	Cdk8	19.3524	18.6106	21.1455	13.8651	23.4842	21.6997	21.191	Q8R3L8	Cdk8	3	4	1771	2779.82	0.650426	1.20427	1.37151
Q99J95	Cdk9	Cyclin-dependent kinase 9	CDK9_MOUSE	42761.6	14	14	13	12	16	13	15	19423780	24006060	19400908	15327014	10948654	10232858	13813533	Q99J95	Cdk9	42761.6		42761.6	Cdk9	24048.2	31915.9	28069	19982.2	10214.7	9934.79	11913.7	Cdk9	176.283	190.395	166.709	153.981	136.951	125.642	136.795	Q99J95	Cdk9	3	4	10687.7	26003.8	1.28277	2.9879	2.80367
Q91WE6	Cdkal1	Threonylcarbamoyladenosine tRNA methylthiotransferase	CDKAL_MOUSE	65288.7	19	19	17	16	13	14	11	7.02755e+06	9476358	7.87158e+06	6430889	2.6595e+06	3.15624e+06	2.89802e+06	Q91WE6	Cdkal1	65288.7		65288.7	Cdkal1	5698.6	8251.69	7459.03	5491.25	1625.11	2007	1637.03	Cdkal1	41.773	49.2256	44.3012	42.3152	21.7882	25.3818	18.7967	Q91WE6	Cdkal1	3	4	1756.38	6725.14	1.93696	3.78985	3.27705
P46414	Cdkn1b	Cyclin-dependent kinase inhibitor 1B	CDN1B_MOUSE	22193.4	9	9	7	9	15	15	14	4.10772e+06	4634575	2.93027e+06	3.33811e+06	19349092	19238150	22802920	P46414	Cdkn1b	22193.4		22193.4	Cdkn1b	9798.94	11872	8168.48	8385.23	34782.1	35987.7	37893.1	Cdkn1b	71.8301	70.8228	48.5148	64.6161	466.332	455.125	435.095	P46414	Cdkn1b	3	4	36221	9556.17	-1.92232	4.30571	3.4798	down
Q8BI72	Cdkn2aip	CDKN2A-interacting protein	CARF_MOUSE	59744.6	24	23	23	23	30	31	30	26415336	26280144	24942072	24550822	32357106	34483404	41444956	Q8BI72	Cdkn2aip	59744.6		59744.6	Cdkn2aip	23407.7	25007.4	25828.1	22909	21606.8	23962.2	25583.9	Cdkn2aip	171.588	149.182	153.4	176.535	289.687	303.042	293.759	Q8BI72	Cdkn2aip	3	4	23717.6	24288	0.0342873	0.183042	0.454756
Q8R3A2	Cdpf1	Cysteine-rich DPF motif domain-containing protein 1	CDPF1_MOUSE	13300.3	0	0	0	0	1	2	2	NaN	NaN	NaN	NaN	460059	695096	972596	Q8R3A2	Cdpf1	13300.3		13300.3	Cdpf1					1379.97	2169.69	2696.9	Cdpf1					18.5017	27.4394	30.9663	Q8R3A2	Cdpf1	3		2082.19					down-a
Q99L43	Cds2	Phosphatidate cytidylyltransferase 2	CDS2_MOUSE	51313.8	9	8	9	9	12	12	12	16534230	15717989	15907174	16234266	13655624	13950001	16533373	Q99L43	Cds2	51313.8		51313.8	Cds2	17058.9	17414.1	19178.6	17637.5	10616.9	11286.4	11882.9	Cds2	125.049	103.884	113.907	135.913	142.343	142.735	136.441	Q99L43	Cds2	3	4	11262	17822.3	0.662215	4.01165	3.37592
Q7TPC1	Cdsn	Corneodesmosin	CDSN_MOUSE	54313.1	1	1	0	0	1	0	1	548266	1.14785e+06	NaN	NaN	1.22667e+06	NaN	2.29012e+06	Q7TPC1	Cdsn	54313.1		54313.1	Cdsn	534.428	1201.49			901.039		1555.06	Cdsn	3.91757	7.16749			12.0805		17.8555	Q7TPC1	Cdsn	2	2	1228.05	867.958	-0.500674	0.293993	0.553571
Q8R4E9	Cdt1	DNA replication factor Cdt1	CDT1_MOUSE	61510	21	22	22	22	25	24	24	16228228	15735582	13466455	14266097	8.0294e+06	9103211	11232670	Q8R4E9	Cdt1	61510		61510	Cdt1	13967.8	14543.8	13544.6	12930	5207.83	6144.19	6734.9	Cdt1	102.389	86.761	80.445	99.6376	69.8226	77.7035	77.3314	Q8R4E9	Cdt1	3	4	6028.97	13746.5	1.18908	4.13744	3.42739
Q4VAA2	Cdv3	Protein CDV3	CDV3_MOUSE	29729	20	20	20	19	16	17	15	57133180	65907784	70071264	53546944	24720412	28731834	31852120	Q4VAA2	Cdv3	29729		29729	Cdv3	101744	126036	145820	100414	33173.7	40123.4	39514	Cdv3	745.826	751.871	866.065	773.781	444.768	507.427	453.708	Q4VAA2	Cdv3	3	4	37603.7	118504	1.65598	3.69488	3.23085
Q9WTK2-2	Cdyl	Isoform 2 of Chromodomain Y-like protein	CDYL_MOUSE	60141.6	10	10	9	7	12	12	12	2.13542e+06	2.54126e+06	2.06912e+06	1456084	2377428	2.09705e+06	2.52738e+06	Q9WTK2	Cdyl	60141.6		60141.6	Cdyl	1879.79	2402.23	2128.47	1349.74	1577.07	1447.6	1549.85	Cdyl	13.7796	14.3305	12.6416	10.401	21.1442	18.3073	17.7956	Q9WTK2	Cdyl	3	4	1524.84	1940.06	0.347441	0.700197	0.920255
Q9D5D8	Cdyl2	Chromodomain Y-like protein 2	CDYL2_MOUSE	56142	7	7	6	6	10	11	9	1188331	1.474e+06	1.5124e+06	1287056	1.76699e+06	1.80994e+06	2.21584e+06	Q9D5D8	Cdyl2	56142		56142	Cdyl2	1120.6	1492.62	1666.62	1278.05	1255.64	1338.41	1455.61	Cdyl2	8.21446	8.90422	9.89852	9.84857	16.8347	16.9265	16.7136	Q9D5D8	Cdyl2	3	4	1349.89	1389.47	0.0416973	0.0627559	0.349688
P31809	Ceacam1	Carcinoembryonic antigen-related cell adhesion molecule 1	CEAM1_MOUSE	57015.8	4	4	4	4	5	5	5	2.08544e+06	2.25778e+06	2.07318e+06	1.80873e+06	3.00227e+06	3334380	3634310	P31809	Ceacam1	57015.8		57015.8	Ceacam1	1936.44	2251.26	2249.57	1768.54	2100.74	2427.92	2350.82	Ceacam1	14.1949	13.4299	13.3608	13.6283	28.1652	30.7051	26.9926	P31809	Ceacam1	3	4	2293.16	2051.45	-0.160693	0.682543	0.903824
P28033;P28033-2;P28033-3	Cebpb	CCAAT/enhancer-binding protein beta;Isoform 3 of CCAAT/enhancer-binding protein beta;Isoform 2 of CCAAT/enhancer-binding protein beta	CEBPB_MOUSE	31445.77;31445.77-2;31445.77-3	0	2	2	1	0	0	0	NaN	318776	247752	83819.9	NaN	NaN	NaN	P28033	Cebpb	31445.8		31445.8	Cebpb		576.319	487.432	148.602				Cebpb		3.43804	2.89499	1.14511				P28033	Cebpb		3		404.117
P53568	Cebpg	CCAAT/enhancer-binding protein gamma	CEBPG_MOUSE	16399.5	2	2	2	1	1	1	1	729312	672255	735705	679925	222756	300086	296690	P53568	Cebpg	16399.5		16399.5	Cebpg	2354.43	2330.47	2775.44	2311.37	541.898	759.679	667.216	Cebpg	17.2589	13.9024	16.4841	17.8112	7.26536	9.60741	7.66109	P53568	Cebpg	3	4	656.264	2442.92	1.89626	4.41275	3.49766
P53569	Cebpz	CCAAT/enhancer-binding protein zeta	CEBPZ_MOUSE	120262	42	41	44	39	27	30	29	61955372	46712536	42603368	30866250	6867576	8212552	8914376	P53569	Cebpz	120262		120262	Cebpz	27274.2	22082.2	21916.6	14308.4	2278.2	2835.07	2733.72	Cebpz	199.93	131.732	130.168	110.26	30.5444	35.8541	31.3891	P53569	Cebpz	3	4	2615.67	21395.3	3.03205	4.19299	3.44468	up
Q8BTE5	Cebpzos	Protein CEBPZOS	CEBOS_MOUSE	9285.93	1	2	3	2	0	0	0	57206.9	598802	523414	397856	NaN	NaN	NaN	Q8BTE5	Cebpzos	9285.93		9285.93	Cebpzos	326.156	3666.04	3487.21	2388.58				Cebpzos	2.39085	21.8698	20.7115	18.4062				Q8BTE5	Cebpzos		4		2467				up-a
P28659-4	Celf1	Isoform 4 of CUGBP Elav-like family member 1	CELF1_MOUSE	55115.8	17	15	17	15	20	20	19	31681692	39323824	38334284	27193912	27715058	30249244	32288226	P28659	Celf1	55115.8		55115.8	Celf1	30432.3	40562	43029.8	27506.4	20061.3	22785.3	21605.4	Celf1	223.081	241.973	255.566	211.963	268.967	288.157	248.077	P28659	Celf1	3	4	21484	35382.6	0.719781	1.83071	1.91475
Q9Z0H4-11	Celf2	Isoform 11 of CUGBP Elav-like family member 2	CELF2_MOUSE	49253.9	15	13	14	15	18	19	19	60632556	76114000	66937308	54979928	79842144	77863904	106772232	Q9Z0H4	Celf2	49253.9		49253.9	Celf2	65173	87854.4	84078.7	62230.3	64671.2	65631.3	79948.7	Celf2	477.744	524.096	499.366	479.543	867.062	830.017	917.986	Q9Z0H4	Celf2	3	4	70083.7	74834.1	0.0946164	0.194096	0.464721
O35161	Celsr1	Cadherin EGF LAG seven-pass G-type receptor 1	CELR1_MOUSE	330471	0	0	1	0	0	0	0	NaN	NaN	245522	NaN	NaN	NaN	NaN	O35161	Celsr1	330471		330471	Celsr1			45.9638					Celsr1			0.272991					O35161	Celsr1		1		45.9638
Q5FWI3	Cemip2	Cell surface hyaluronidase	CEIP2_MOUSE	153801	3	3	3	3	4	0	3	372659	212595	447320	447939	509997	NaN	422997	Q5FWI3	Cemip2	153801		153801	Cemip2	128.279	78.5839	179.936	162.367	132.29		101.431	Cemip2	0.940335	0.468794	1.06869	1.25119	1.77365		1.16465	Q5FWI3	Cemip2	2	4	116.861	137.292	0.232451	0.160089	0.43442
Q4VA36;Q4VA36-2;Q4VA36-3	Cenatac	Centrosomal AT-AC splicing factor;Isoform 2 of Centrosomal AT-AC splicing factor;Isoform 3 of Centrosomal AT-AC splicing factor	CATAC_MOUSE	37701.49;37701.49-2;37701.49-3	1	0	0	0	1	2	0	469129	NaN	NaN	NaN	373509	466811	NaN	Q4VA36	Cenatac	37701.5		37701.5	Cenatac	658.774				395.241	514.041		Cenatac	4.82907				5.29909	6.50091		Q4VA36	Cenatac	2	1	454.641	658.774	0.535055	0.463528	0.706129
O35216	Cenpa	Histone H3-like centromeric protein A	CENPA_MOUSE	15509.1	2	3	2	2	4	4	4	3242834	3.32601e+06	2.06552e+06	2160519	4420355	4.61952e+06	5394642	O35216	Cenpa	15509.1		15509.1	Cenpa	11069.8	12192	8239.5	7766.22	11370.8	12365.9	12828.3	Cenpa	81.1461	72.7318	48.9366	59.846	152.451	156.387	147.297	O35216	Cenpa	3	4	12188.3	9816.89	-0.31216	0.849129	1.05368
P27790	Cenpb	Major centromere autoantigen B	CENPB_MOUSE	65381.4	1	1	1	1	0	1	0	104625	118842	115122	109259	NaN	29445.6	NaN	P27790	Cenpb	65381.4		65381.4	Cenpb	84.7195	103.337	108.934	93.1628		18.6974		Cenpb	0.621028	0.616457	0.646988	0.717906		0.23646		P27790	Cenpb	1	4	18.6974	97.5383	2.38313	3.0264	2.83336	up
P49452	Cenpc	Centromere protein C	CENPC_MOUSE	102154	22	19	24	24	27	28	30	7478458	6.16042e+06	6679629	6871687	7.23507e+06	8463039	10054824	P49452	Cenpc	102154		102154	Cenpc	3875.79	3428.43	4045.35	3750.14	2825.58	3439.43	3630.06	Cenpc	28.411	20.4524	24.0264	28.8983	37.8832	43.4974	41.681	P49452	Cenpc	3	4	3298.36	3774.93	0.194701	0.894408	1.0941
Q6RT24	Cenpe	Centromere-associated protein E	CENPE_MOUSE	286525	0	2	2	0	0	0	0	NaN	86308.8	369449	NaN	NaN	NaN	NaN	Q6RT24	Cenpe	286525		286525	Cenpe		17.1251	79.772					Cenpe		0.10216	0.473787					Q6RT24	Cenpe		2		48.4486
E9Q3P4;Q155P7;Q9QZ84	Cenpf	E9Q3Centromere protein F;Q155LEK1;Q9LEK1 (Fragment)	E9Q3P4_M;Q155P7_M;Q9QZ84_MOU	342471.76;342451.67;281905.31	3	4	3	4	3	0	3	388088	3.70945e+06	3.64961e+06	2.82753e+06	719763	NaN	891301	E9Q3P4	Cenpf	342472		342472	Cenpf	59.994	615.778	659.295	460.279	83.8463		95.9828	Cenpf	0.43978	3.67343	3.91573	3.54688	1.12415		1.10209	E9Q3P4	Cenpf	2	4	89.9146	448.836	2.31956	0.686021	0.907087
Q9QYM8	Cenph	Centromere protein H	CENPH_MOUSE	28135.5	0	0	3	0	0	0	0	NaN	NaN	1.07906e+06	NaN	NaN	NaN	NaN	Q9QYM8	Cenph	28135.5		28135.5	Cenph			2372.73					Cenph			14.0923					Q9QYM8	Cenph		1		2372.73
Q8K1K4	Cenpi	Centromere protein I	CENPI_MOUSE	85403.4	0	0	3	3	2	3	3	NaN	NaN	389957	322332	240028	766159	472532	Q8K1K4	Cenpi	85403.4		85403.4	Cenpi			282.488	210.41	112.126	372.442	204.056	Cenpi			1.67777	1.62141	1.5033	4.71015	2.34301	Q8K1K4	Cenpi	3	2	229.541	246.449	0.102535	0.138794	0.415914
Q569L8	Cenpj	Centromere protein J	CENPJ_MOUSE	153079	0	2	0	0	2	0	2	NaN	175009	NaN	NaN	93393.6	NaN	124207	Q569L8	Cenpj	153079		153079	Cenpj		64.9955			24.34		29.9242	Cenpj		0.387732			0.326332		0.343595	Q569L8	Cenpj	2	1	27.1321	64.9955	1.26034	0.893415	1.09326
Q9ESN5	Cenpk	Centromere protein K	CENPK_MOUSE	31686.3	0	2	2	0	0	0	0	NaN	161462	183682	NaN	NaN	NaN	NaN	Q9ESN5	Cenpk	31686.3		31686.3	Cenpk		289.692	358.634					Cenpk		1.72816	2.13003					Q9ESN5	Cenpk		2		324.163
Q3U3S3	Cenpl	Centromere protein L	CENPL_MOUSE	37725.1	1	1	0	1	1	1	2	27351	29939.7	NaN	26776.8	36422.6	57137	155678	Q3U3S3	Cenpl	37725.1		37725.1	Cenpl	38.3835	45.1187		39.5701	38.5176	62.8785	152.191	Cenpl	0.281367	0.269156		0.304925	0.516415	0.795203	1.74749	Q3U3S3	Cenpl	3	3	84.5292	41.0241	-1.04298	0.622607	0.84953
Q9CZ92	Cenpp	Centromere protein P	CENPP_MOUSE	33287.9	2	3	2	0	3	2	3	172926	387773	261096	NaN	169398	197649	236093	Q9CZ92	Cenpp	33287.9		33287.9	Cenpp	275.027	662.263	485.257		203.021	246.503	261.571	Cenpp	2.01606	3.95074	2.88207		2.72196	3.11744	3.00341	Q9CZ92	Cenpp	3	3	237.032	474.182	1.00036	1.11536	1.29098
Q9CPQ5	Cenpq	Centromere protein Q	CENPQ_MOUSE	30501.2	3	2	3	2	3	4	3	780989	439448	609960	528030	315180	555715	506893	Q9CPQ5	Cenpq	30501.2		30501.2	Cenpq	1355.59	819.086	1237.21	965.116	412.25	756.398	612.905	Cenpq	9.93705	4.88627	7.34811	7.43712	5.52714	9.56591	7.03748	Q9CPQ5	Cenpq	3	4	593.851	1094.25	0.881771	1.56261	1.68764
Q9D084	Cenps	Centromere protein S	CENPS_MOUSE	16335.4	3	3	2	2	0	0	0	669007	1.13396e+06	700323	520308	NaN	NaN	NaN	Q9D084	Cenps	16335.4		16335.4	Cenps	2168.22	3946.46	2652.33	1775.7				Cenps	15.8939	23.5427	15.7529	13.6834				Q9D084	Cenps		4		2635.68				up-a
Q8C4M7	Cenpu	Centromere protein U	CENPU_MOUSE	46370.5	0	4	4	2	0	4	5	NaN	213063	414237	260559	NaN	174058	218308	Q8C4M7	Cenpu	46370.5		46370.5	Cenpu		261.22	552.67	313.259		155.836	173.629	Cenpu		1.55831	3.28245	2.41395		1.9708	1.99364	Q8C4M7	Cenpu	2	3	164.732	375.716	1.18952	1.10514	1.28212
Q9CXS4	Cenpv	Centromere protein V	CENPV_MOUSE	27541.1	9	8	9	8	9	9	9	4623886	2535653	3581143	3.02972e+06	2597888	2935367	4.02158e+06	Q9CXS4	Cenpv	27541.1		27541.1	Cenpv	8888.5	5234.18	8044.5	6132.83	3763.21	4424.83	5385.29	Cenpv	65.1562	31.2246	47.7784	47.2592	50.4543	55.9594	61.8349	Q9CXS4	Cenpv	3	4	4524.45	7075	0.644989	1.31269	1.46838
Q80V31	Cep104	Centrosomal protein of 104 kDa	CE104_MOUSE	103946	1	1	1	1	1	1	1	723525	1.00885e+06	924537	538798	317048	398060	383240	Q80V31	Cep104	103946		103946	Cep104	368.508	551.769	550.267	288.972	121.685	158.984	135.974	Cep104	2.70131	3.29159	3.26819	2.2268	1.63145	2.01062	1.56128	Q80V31	Cep104	3	4	138.881	439.879	1.66326	2.61227	2.53653
Q7TSG1	Cep120	Centrosomal protein of 120 kDa	CE120_MOUSE	112579	14	16	15	14	30	32	30	3.156e+06	3.68694e+06	3.61926e+06	2.67086e+06	8620672	9087453	10631847	Q7TSG1	Cep120	112579		112579	Cep120	1484.17	1861.87	1988.93	1322.61	3054.94	3351.2	3482.93	Cep120	10.8795	11.107	11.8128	10.1919	40.9583	42.3815	39.9917	Q7TSG1	Cep120	3	4	3296.36	1664.39	-0.985875	2.70487	2.60343	down
Q8BI22;Q8BI22-2	Cep128	Centrosomal protein of 128 kDa;Isoform 2 of Centrosomal protein of 128 kDa	CE128_MOUSE	128503.07;128503.07-2	0	0	0	0	2	3	3	NaN	NaN	NaN	NaN	118436	167356	258258	Q8BI22	Cep128	128503		128503	Cep128					36.7695	54.0684	74.1196	Cep128					0.492978	0.683785	0.851056	Q8BI22	Cep128	3		54.9859					down-a
Q62036	Cep131	Centrosomal protein of 131 kDa	CP131_MOUSE	120313	8	9	9	8	6	8	6	1.36538e+06	1.74807e+06	1373583	931450	460011	726731	562553	Q62036	Cep131	120313		120313	Cep131	600.816	826.009	706.318	431.604	152.537	250.77	172.443	Cep131	4.40422	4.92757	4.19501	3.32591	2.0451	3.17141	1.98002	Q62036	Cep131	3	4	191.917	641.187	1.74027	2.67445	2.58083
Q6P5D4	Cep135	Centrosomal protein of 135 kDa	CP135_MOUSE	133345	33	32	37	34	49	53	45	8.32043e+06	9902664	9222246	7.59059e+06	24626974	30718232	34809952	Q6P5D4	Cep135	133345		133345	Cep135	3303.47	4221.96	4278.75	3173.48	7368.05	9563.87	9627.63	Cep135	24.2157	25.1861	25.4127	24.4546	98.7852	120.951	110.546	Q6P5D4	Cep135	3	4	8853.18	3744.41	-1.24146	3.10637	2.88532	down
A2AUM9	Cep152	Centrosomal protein of 152 kDa	CE152_MOUSE	196534	21	25	21	20	13	22	16	2.82823e+06	4630686	3.39546e+06	2.77249e+06	1.94963e+06	2.38054e+06	2.57755e+06	A2AUM9	Cep152	196534		196534	Cep152	761.868	1339.52	1068.86	786.452	395.763	502.868	483.686	Cep152	5.5848	7.9909	6.34824	6.06035	5.30609	6.35961	5.55377	A2AUM9	Cep152	3	4	460.772	989.174	1.10217	2.13531	2.16424
Q6ZQ06	Cep162	Centrosomal protein of 162 kDa	CE162_MOUSE	160855	0	4	2	4	10	11	10	NaN	72164744	66476952	38080036	154549264	150696608	222877616	Q6ZQ06	Cep162	160855		160855	Cep162		25505.3	25567.9	13197.8	38331.1	38894.1	51100.6	Cep162		152.152	151.855	101.701	513.915	491.881	586.746	Q6ZQ06	Cep162	3	3	42775.3	21423.7	-0.997573	1.41584	1.55889
Q6A065	Cep170	Centrosomal protein of 170 kDa	CE170_MOUSE	175050	26	24	29	29	36	32	34	6571794	8.0734e+06	7365065	6.01547e+06	6.80595e+06	6.54135e+06	8.24184e+06	Q6A065	Cep170	175050		175050	Cep170	1987.58	2622.01	2602.99	1915.78	1551.12	1551.39	1736.43	Cep170	14.5697	15.6416	15.4599	14.7629	20.7963	19.6199	19.938	Q6A065	Cep170	3	4	1612.98	2282.09	0.500629	1.62952	1.74385
Q80U49	Cep170b	Centrosomal protein of 170 kDa protein B	C170B_MOUSE	170821	1	1	0	0	0	0	0	56323.4	83615.2	NaN	NaN	NaN	NaN	NaN	Q80U49	Cep170b	170821		170821	Cep170b	17.4562	27.8281						Cep170b	0.127961	0.166009						Q80U49	Cep170b		2		22.6422
E9Q4Y4	Cep192	E9Q4Centrosomal protein 192	E9Q4Y4_M	276341	30	29	37	31	37	36	32	6.95294e+06	10177646	10119898	6893424	6358126	7.05856e+06	8854484	E9Q4Y4	Cep192	276341		276341	Cep192	1332.06	2093.83	2265.63	1390.68	917.916	1060.44	1181.71	Cep192	9.76456	12.4908	13.4562	10.7165	12.3067	13.411	13.5686	E9Q4Y4	Cep192	3	4	1053.36	1770.55	0.749207	1.45457	1.59322
Q60952	Cep250	Centrosome-associated protein CEP250	CP250_MOUSE	276814	24	22	24	23	48	55	49	3431341	4.6073e+06	4.64606e+06	3.20909e+06	9312250	12358384	15130305	Q60952	Cep250	276814		276814	Cep250	656.263	946.232	1038.38	646.297	1342.1	1853.48	2015.83	Cep250	4.81067	5.64476	6.1672	4.98032	17.9939	23.4404	23.1461	Q60952	Cep250	3	4	1737.14	821.792	-1.07987	2.08642	2.12586	down
E9Q309	Cep350	Centrosome-associated protein 350	CE350_MOUSE	346456	22	30	27	24	35	37	33	2.77401e+06	7.02476e+06	3.97738e+06	3301789	13100578	5.24843e+06	5584102	E9Q309	Cep350	346456		346456	Cep350	423.898	1152.72	710.243	531.299	1508.55	628.922	594.427	Cep350	3.10734	6.87655	4.21832	4.09416	20.2256	7.95376	6.82532	E9Q309	Cep350	3	4	910.634	704.539	-0.370192	0.262028	0.525146
Q99NF3	Cep41	Centrosomal protein of 41 kDa	CEP41_MOUSE	41441.7	12	12	13	13	13	13	10	5.03256e+06	4.98683e+06	4.53008e+06	4204597	1.83487e+06	2.36128e+06	2117350	Q99NF3	Cep41	41441.7		41441.7	Cep41	6429.15	6841.11	6762.81	5656.21	1766.4	2365.52	1884.3	Cep41	47.1283	40.8107	40.1661	43.5864	23.6825	29.9159	21.6358	Q99NF3	Cep41	3	4	2005.4	6422.32	1.6792	4.31091	3.4798
Q66JX5;Q66JX5-2	Cep43	Centrosomal protein 43;Isoform 2 of Centrosomal protein 43	CEP43_MOUSE	42758.36;42758.36-2	11	11	10	9	12	12	13	6762678	7847205	6533580	5488350	4003175	4.71138e+06	7228360	Q66JX5	Cep43	42758.4		42758.4	Cep43	8373.36	10433.6	9453.41	7155.82	3735.1	4574.49	6234.65	Cep43	61.3801	62.2417	56.1463	55.1423	50.0775	57.852	71.5875	Q66JX5	Cep43	3	4	4848.08	8854.04	0.868922	1.94534	2.01209
Q5HZK1	Cep44	Centrosomal protein of 44 kDa	CEP44_MOUSE	43255.3	5	7	6	5	6	6	5	711922	1.56154e+06	845734	1.12901e+06	1.02786e+06	1.00453e+06	1.1174e+06	Q5HZK1	Cep44	43255.3		43255.3	Cep44	871.354	2052.36	1209.63	1455.11	948.015	964.139	952.71	Cep44	6.38737	12.2434	7.18431	11.213	12.7103	12.1931	10.9392	Q5HZK1	Cep44	3	4	954.954	1397.11	0.548945	0.752494	0.966234
Q8BT07;Q8BT07-2	Cep55	Centrosomal protein of 55 kDa;Isoform 2 of Centrosomal protein of 55 kDa	CEP55_MOUSE	53930.35;53930.35-2	7	10	9	7	0	0	0	1.71672e+06	3517337	3.24455e+06	1.70429e+06	NaN	NaN	NaN	Q8BT07	Cep55	53930.3		53930.3	Cep55	1685.26	3707.83	3722.02	1761.77				Cep55	12.3536	22.1191	22.1061	13.5761				Q8BT07	Cep55		4		2719.22				up-a
[truncated: 6,936 more rows]
[truncated: 13 more columns]

## Sheet: cell mass
Organism	Total protein [pg/cell]	Total molecules per cell	Histone mass [pg/cell]	Ploidy	Cell volume [fl]	Sample
M. musculus	45.31	820064491	5.5225	2	226.53	[1] LPS+IL4-R1
[truncated: 6 more rows]
