# Supplementary material for: Lipopolysaccharide stimulates dynamic changes in B cell metabolism to promote proliferation
Source: eLife. 2026 May 21;14:RP109093. doi: 10.7554/eLife.109093 (PMC13193715; doi:10.7554/eLife.109093)
Supplement: Supplementary file 4. [file elife-109093-supp4.xlsx]

## Sheet: Sheet1
PG.MolecularWeight	PG.ProteinAccessions	PG.Genes	PG.ProteinDescriptions	PG.ProteinNames	[1] LPS + IL-4 Fluvastatin-delipidated media-1.raw.PG.NrOfStrippedSequencesUsedForQuantification	[2] LPS + IL-4 Fluvastatin-delipidated media-2.raw.PG.NrOfStrippedSequencesUsedForQuantification	[3] LPS + IL-4 Fluvastatin-delipidated media-3-Rep.raw.PG.NrOfStrippedSequencesUsedForQuantification	[4] LPS + IL-4 Fluvastatin-delipidated media-4-Rep.raw.PG.NrOfStrippedSequencesUsedForQuantification	[5] LPS + IL-4 Fluvastatin-normal media-1.raw.PG.NrOfStrippedSequencesUsedForQuantification	[6] LPS + IL-4 Fluvastatin-normal media-2.raw.PG.NrOfStrippedSequencesUsedForQuantification	[7] LPS + IL-4 Fluvastatin-normal media-3.raw.PG.NrOfStrippedSequencesUsedForQuantification	[8] LPS + IL-4 Fluvastatin-normal media-4.raw.PG.NrOfStrippedSequencesUsedForQuantification	[9] LPS + IL-4-delipidated media-1.raw.PG.NrOfStrippedSequencesUsedForQuantification	[10] LPS + IL-4-delipidated media-2.raw.PG.NrOfStrippedSequencesUsedForQuantification	[11] LPS + IL-4-delipidated media-3.raw.PG.NrOfStrippedSequencesUsedForQuantification	[12] LPS + IL-4-delipidated media-4.raw.PG.NrOfStrippedSequencesUsedForQuantification	[13] LPS + IL-4-normal media-1.raw.PG.NrOfStrippedSequencesUsedForQuantification	[14] LPS + IL-4-normal media-2.raw.PG.NrOfStrippedSequencesUsedForQuantification	[15] LPS + IL-4-normal media-3.raw.PG.NrOfStrippedSequencesUsedForQuantification	[16] LPS + IL-4-normal media-4.raw.PG.NrOfStrippedSequencesUsedForQuantification	[17] Naive-1.raw.PG.NrOfStrippedSequencesUsedForQuantification	[18] Naive-2.raw.PG.NrOfStrippedSequencesUsedForQuantification	[19] Naive-3.raw.PG.NrOfStrippedSequencesUsedForQuantification	[20] Naive-4.raw.PG.NrOfStrippedSequencesUsedForQuantification	[1] LPS + IL-4 Fluvastatin-delipidated media-1.raw.PG.Quantity	[2] LPS + IL-4 Fluvastatin-delipidated media-2.raw.PG.Quantity	[3] LPS + IL-4 Fluvastatin-delipidated media-3.raw.PG.Quantity	[4] LPS + IL-4 Fluvastatin-delipidated media-4.raw.PG.Quantity	[5] LPS + IL-4 Fluvastatin-normal media-1.raw.PG.Quantity	[6] LPS + IL-4 Fluvastatin-normal media-2.raw.PG.Quantity	[7] LPS + IL-4 Fluvastatin-normal media-3.raw.PG.Quantity	[8] LPS + IL-4 Fluvastatin-normal media-4.raw.PG.Quantity	[9] LPS + IL-4-delipidated media-1.raw.PG.Quantity	[10] LPS + IL-4-delipidated media-2.raw.PG.Quantity	[11] LPS + IL-4-delipidated media-3.raw.PG.Quantity	[12] LPS + IL-4-delipidated media-4.raw.PG.Quantity	[13] LPS + IL-4-normal media-1.raw.PG.Quantity	[14] LPS + IL-4-normal media-2.raw.PG.Quantity	[15] LPS + IL-4-normal media-3.raw.PG.Quantity	[16] LPS + IL-4-normal media-4.raw.PG.Quantity	[17] Naive-1.raw.PG.Quantity	[18] Naive-2.raw.PG.Quantity	[19] Naive-3.raw.PG.Quantity	[20] Naive-4.raw.PG.Quantity	PG.MolecularWeight	PG.ProteinAccessions	PG.Genes	Histones	PG.MolecularWeight
164353	Q6GQT1	A2m	Alpha-2-macroglobulin-P	A2MG_MOUSE	3	3	3	4	3	2	3	3	2	3	3	4	3	2	3	3	1	5	3	4	80986.6	40470.1	97009.5	173926	41014.3	50145.6	51672.8	39669.3	23582.6	35302	74452.5	53001.9	76631.5	29333	49986	89272.2	8660.97	213460	84195.6	154005	164353	Q6GQT1	A2m		164353
59430.7	P58742	Aaas	Aladin	AAAS_MOUSE	9	8	14	13	11	9	10	11	10	12	11	12	13	11	9	10	6	10	12	9	125004	98218.3	439142	257054	247432	228632	278728	206826	271717	315163	376096	208785	292394	179150	340775	340016	84082.7	164180	225909	161731	59430.7	P58742	Aaas		59430.7
75200.2	Q9D2R0	Aacs	Acetoacetyl-CoA synthetase	AACS_MOUSE	22	18	30	26	23	23	23	23	22	21	19	21	24	18	20	19	12	16	15	13	1.68237e+06	1.16802e+06	4.23893e+06	1.35871e+06	3000526	2335246	3.22884e+06	2680963	3.03682e+06	3322507	3.51785e+06	1.45577e+06	1.56597e+06	1.04329e+06	2.61228e+06	2.39207e+06	259892	437701	453193	285772	75200.2	Q9D2R0	Aacs		75200.2
34510.5	Q8R2R3	Aagab	Alpha- and gamma-adaptin-binding protein p34	AAGAB_MOUSE	1	0	1	1	1	2	1	1	1	1	1	1	2	2	1	1	0	1	2	1	8036.62	NaN	13499.5	6565.16	13048.9	17060.9	27439.4	13474.7	17067.4	17199.4	18940.6	11540	18397.9	9528.21	16822.3	29272.9	NaN	8634.03	19803.8	14873.7	34510.5	Q8R2R3	Aagab		34510.5
103346.24;103346.24-2	Q3UHJ0;Q3UHJ0-2	Aak1	AP2-associated protein kinase 1;Isoform 2 of AP2-associated protein kinase 1	AAK1_MOUSE	17	16	22	20	22	20	22	21	17	22	20	21	24	16	21	21	16	19	19	20	202242	115723	453108	281574	393852	352767	450647	347918	321781	421695	484516	319666	382479	237329	509379	483099	314142	351889	492693	375737	103346	Q3UHJ0	Aak1		103346
13244.1;13244.1-2	Q8R0P4;Q8R0P4-2	Aamdc	Mth938 domain-containing protein;Isoform 2 of Mth938 domain-containing protein	AAMDC_MOUSE	0	0	2	0	2	1	2	2	0	0	0	0	2	1	0	0	2	2	2	2	NaN	NaN	20505.9	NaN	21464	8597.12	21275.6	17137.2	NaN	NaN	NaN	NaN	20503.4	7690.29	NaN	NaN	23705.1	19295.7	32350.2	22447.6	13244.1	Q8R0P4	Aamdc		13244.1
46966.07;46895;46898.98;38509.31	J3QN89;Q3TJ22;Q3U9F0;Q8K2C1	Aamp	J3Angio-associated migratory protein;Q3Angio-associated migratory protein;Q3U9Uncharacterized protein;Q8K2Aamp protein	J3QN89_MOU;Q3TJ22_MOU;Q3U9F0_M;Q8K2C1_M	11	11	11	11	11	11	11	11	11	11	11	10	11	10	11	11	8	10	9	10	258574	205979	544264	298165	486126	405453	611259	424974	594601	651708	673740	387790	557172	363530	675126	714173	124332	155531	238990	212343	46966.1	J3QN89	Aamp		46966.1
43408	Q9D2V5	Aar2	Protein AAR2 homolog	AAR2_MOUSE	6	5	9	6	9	7	8	7	9	9	9	7	9	7	9	9	4	3	8	0	69005.7	41655.1	161113	47925.6	144831	102224	132031	100627	183677	180157	208746	108175	146753	83015.8	178652	209241	38842.9	38452.2	77571.7	NaN	43408	Q9D2V5	Aar2		43408
106909	Q8BGQ7	Aars1	Alanine--tRNA ligase, cytoplasmic	SYAC_MOUSE	43	41	43	39	42	44	41	42	43	43	43	45	44	43	42	43	30	39	39	34	2.82157e+06	2.06327e+06	5383317	3359051	5377473	4.59123e+06	6091712	4.6817e+06	5279063	5399666	6218622	4.57196e+06	4.79101e+06	3.44669e+06	6474977	6.09733e+06	1.21006e+06	1.53679e+06	1.85006e+06	1705507	106909	Q8BGQ7	Aars1		106909
106783	Q14CH7	Aars2	Alanine--tRNA ligase, mitochondrial	SYAM_MOUSE	9	9	15	15	12	12	13	16	15	17	14	10	15	11	15	17	8	13	10	9	76431.2	46137.3	196411	114940	101468	80729	116998	104927	160174	189168	181083	52730.5	137265	60511.3	186337	162836	61325.9	86349.6	89016.7	75009.1	106783	Q14CH7	Aars2		106783
44970.9	Q3THG9	Aarsd1	Alanyl-tRNA editing protein Aarsd1	AASD1_MOUSE	10	9	11	9	11	12	11	12	11	13	13	10	14	11	12	13	10	8	10	9	171037	142542	1.18819e+06	129504	393434	296054	406519	371703	512637	1.39489e+06	1.56002e+06	135632	1.08559e+06	223294	630850	1.49903e+06	452142	191180	290036	197582	44970.9	Q3THG9	Aarsd1		44970.9
121569.25;121569.25-2	Q80WC9;Q80WC9-2	Aasdh	Beta-alanine-activating enzyme;Isoform 2 of Beta-alanine-activating enzyme	ACSF4_MOUSE	0	0	0	0	0	0	0	0	0	0	0	0	0	0	0	0	0	1	0	0	NaN	NaN	NaN	NaN	NaN	NaN	NaN	NaN	NaN	NaN	NaN	NaN	NaN	NaN	NaN	NaN	NaN	2346.21	NaN	NaN	121569	Q80WC9	Aasdh		121569
35764.1	Q9CQF6	Aasdhppt	L-aminoadipate-semialdehyde dehydrogenase-phosphopantetheinyl transferase	ADPPT_MOUSE	7	6	8	7	8	7	10	7	10	10	12	9	10	8	12	10	0	4	3	6	55281.9	38098.5	114181	82600.3	101375	85079.9	121909	85221.9	183825	227191	268122	137114	158190	117838	246121	194713	NaN	25883	25827.3	48461.9	35764.1	Q9CQF6	Aasdhppt		35764.1
59482.1	Q9JKX4	Aatf	Protein AATF	AATF_MOUSE	19	19	19	20	19	19	19	17	19	19	20	19	20	19	19	18	14	18	18	18	793697	644024	1.56071e+06	1.18588e+06	1068329	1.06865e+06	1245095	748453	1.36417e+06	1.55622e+06	1.94442e+06	1.15595e+06	998255	864016	1.50944e+06	1.43904e+06	338981	426768	572684	481879	59482.1	Q9JKX4	Aatf		59482.1
191971	Q8R420	Abca3	Phospholipid-transporting ATPase ABCA3	ABCA3_MOUSE	1	0	6	3	0	2	0	0	5	2	5	0	0	0	2	4	0	5	10	4	4759.48	NaN	58102	23159	NaN	18973.7	NaN	NaN	29910.4	16886.5	40008.8	NaN	NaN	NaN	20140	43672.9	NaN	30982	110323	39625.4	191971	Q8R420	Abca3		191971
183283	Q8K441	Abca6	ATP-binding cassette sub-family A member 6	ABCA6_MOUSE	1	0	2	2	0	2	2	0	2	2	0	0	0	2	2	1	0	1	1	0	150697	NaN	153703	129996	NaN	252563	366772	NaN	379648	373113	NaN	NaN	NaN	250247	450959	447481	NaN	298618	348834	NaN	183283	Q8K441	Abca6		183283
183114	Q8K449	Abca9	ATP-binding cassette sub-family A member 9	ABCA9_MOUSE	0	0	0	0	0	0	0	0	0	0	1	0	1	1	0	0	1	0	0	1	NaN	NaN	NaN	NaN	NaN	NaN	NaN	NaN	NaN	NaN	37882.6	NaN	17391.1	10932.3	NaN	NaN	14779.7	NaN	NaN	18007.2	183114	Q8K449	Abca9		183114
77188	Q9JI39	Abcb10	ATP-binding cassette sub-family B member 10, mitochondrial	ABCBA_MOUSE	12	11	16	15	13	11	16	13	14	15	14	10	11	10	14	13	7	14	16	15	104182	82651	281749	183271	182850	140513	241782	139598	162005	197294	237772	101677	108176	67927.9	204687	191104	97480.3	192907	264601	194924	77188	Q9JI39	Abcb10		77188
146749	Q9QY30	Abcb11	Bile salt export pump	ABCBB_MOUSE	0	0	2	1	2	2	1	0	2	2	1	2	1	2	1	0	0	0	0	0	NaN	NaN	18992.8	8096.65	17373.8	26239.1	6209.56	NaN	18082.5	32185.7	13577.3	18842.8	6277.7	18947.2	7142.08	NaN	NaN	NaN	NaN	NaN	146749	Q9QY30	Abcb11		146749
140994	P06795	Abcb1b	ATP-dependent translocase ABCB1	MDR1B_MOUSE	9	6	16	12	9	11	10	8	13	12	17	20	12	6	13	10	0	0	0	0	36792.9	21756.3	193333	120543	49698.4	65303.1	72455	66578.7	131180	129435	213460	233085	74931	31150.7	125422	111258	NaN	NaN	NaN	NaN	140994	P06795	Abcb1b		140994
93770.4	Q9DC29	Abcb6	ATP-binding cassette sub-family B member 6	ABCB6_MOUSE	10	8	10	11	9	11	10	9	10	10	9	9	10	8	11	8	2	7	7	5	70418.3	52883.7	142624	165917	89138.4	146472	126680	86212.2	134294	131902	133477	103695	91809.2	81677.3	183300	112629	10167.2	47777.3	42079.2	25079.2	93770.4	Q9DC29	Abcb6		93770.4
82580.9	Q61102	Abcb7	Iron-sulfur clusters transporter ABCB7, mitochondrial	ABCB7_MOUSE	14	14	17	15	14	16	16	15	15	17	15	15	17	15	15	15	14	15	16	15	390175	348733	872402	640117	635113	535068	670817	525451	700446	706774	782101	480935	634132	423224	740319	759976	530535	710761	872349	710103	82580.9	Q61102	Abcb7		82580.9
77999.6	Q9CXJ4	Abcb8	Mitochondrial potassium channel ATP-binding subunit	MITOS_MOUSE	9	8	15	15	10	14	10	11	13	12	11	13	11	8	10	13	6	11	14	11	82964.4	56554.6	249359	222793	127763	151722	138501	108067	147800	161101	185322	140952	95759.1	61433.1	147851	158110	74534.2	100729	168223	121489	77999.6	Q9CXJ4	Abcb8		77999.6
171185	O35379	Abcc1	Multidrug resistance-associated protein 1	MRP1_MOUSE	19	17	27	22	18	23	25	16	23	24	26	19	23	16	25	31	5	8	7	10	220283	156121	508265	305340	261789	276321	387371	189025	441999	468601	582296	215476	353772	180734	509598	651091	22751.4	63892.9	49442.7	97307.2	171185	O35379	Abcc1		171185
148888.09;148888.09-2;148888.09-3	E9Q236;E9Q236-2;E9Q236-3	Abcc4	ATP-binding cassette sub-family C member 4;Isoform 2 of ATP-binding cassette sub-family C member 4;Isoform 3 of ATP-binding cassette sub-family C member 4	MRP4_MOUSE	12	8	18	20	18	11	16	10	16	13	16	12	19	8	18	13	4	11	12	10	77785.9	40202.9	205085	158462	141401	89137.6	162457	85490.3	162000	123444	211694	83261.7	159633	49998.9	211531	144532	24567.1	70650.5	94399.5	74894.6	148888	E9Q236	Abcc4		148888
81858.9	P48410	Abcd1	ATP-binding cassette sub-family D member 1	ABCD1_MOUSE	16	12	18	19	17	17	18	18	19	17	19	19	16	16	19	18	15	18	18	18	216974	163186	486147	468127	414563	349623	434093	329396	368568	421308	501904	415935	335971	233920	537087	504242	487415	630810	763522	642765	81858.9	P48410	Abcd1		81858.9
75474.6	P55096	Abcd3	ATP-binding cassette sub-family D member 3	ABCD3_MOUSE	8	6	14	9	11	8	10	10	10	10	10	7	10	7	9	9	5	8	9	10	86559.2	47653.9	225684	132859	195321	118904	171059	129032	221863	203465	212339	100107	135530	72093.3	178230	251741	77369.9	135156	147546	134583	75474.6	P55096	Abcd3		75474.6
67314.3	P61222	Abce1	ATP-binding cassette sub-family E member 1	ABCE1_MOUSE	29	29	28	29	31	31	29	30	31	31	31	32	31	30	30	28	23	24	25	25	2.0072e+06	1.5465e+06	4198062	2.60733e+06	3.40653e+06	3.18556e+06	4.05623e+06	2.90346e+06	4.37985e+06	4746624	5.52725e+06	3.37567e+06	3.6527e+06	2728273	5.1691e+06	4679144	1.43549e+06	1.44077e+06	2.26215e+06	1571924	67314.3	P61222	Abce1		67314.3
94945.4	Q6P542	Abcf1	ATP-binding cassette sub-family F member 1	ABCF1_MOUSE	23	22	30	28	24	28	27	24	25	26	26	25	27	21	25	23	20	21	21	20	1.05627e+06	776001	2.15509e+06	1.42764e+06	1.79684e+06	1.62257e+06	2.12595e+06	1.48323e+06	2.25263e+06	2.33982e+06	2644665	1.57773e+06	1.89579e+06	1.41586e+06	2.68305e+06	2564587	872926	969627	1.4252e+06	1.14505e+06	94945.4	Q6P542	Abcf1		94945.4
71781.7	Q99LE6	Abcf2	ATP-binding cassette sub-family F member 2	ABCF2_MOUSE	27	26	29	29	30	27	27	27	30	30	30	29	29	27	30	29	17	23	23	22	1.76941e+06	1.26869e+06	3.77351e+06	2.269e+06	2.68877e+06	2.56516e+06	3169291	2.31306e+06	3.96146e+06	4149474	4776884	2.56706e+06	3.19431e+06	2.16112e+06	4245341	4088628	580478	746897	1.04822e+06	879990	71781.7	Q99LE6	Abcf2		71781.7
79864.8	Q8K268	Abcf3	ATP-binding cassette sub-family F member 3	ABCF3_MOUSE	24	25	24	27	30	25	28	28	28	28	27	28	29	25	31	29	14	24	23	23	439382	357409	823778	781905	848775	723254	912486	649349	934482	1.07669e+06	1.10124e+06	865769	877082	604391	1.19235e+06	1.12597e+06	293022	484237	581731	528191	79864.8	Q8K268	Abcf3		79864.8
73613.2	Q99P81	Abcg3	ATP-binding cassette sub-family G member 3	ABCG3_MOUSE	0	0	3	3	4	3	0	2	0	2	3	2	3	1	4	3	1	7	6	4	NaN	NaN	23133	9725.62	16731.9	15288	NaN	12341.8	NaN	15756.8	22238.5	14679.3	16358.3	4050.75	26535.3	20860.1	10433.7	58724.1	68639.3	38721.1	73613.2	Q99P81	Abcg3		73613.2
33040.48;33040.48-2	Q6PE15;Q6PE15-2	Abhd10	Palmitoyl-protein thioesterase ABHD10, mitochondrial;Isoform 2 of Palmitoyl-protein thioesterase ABHD10, mitochondrial	ABHDA_MOUSE	5	4	7	7	6	4	5	6	6	6	6	8	7	5	6	5	5	6	7	6	69014.6	38902.9	184790	192910	123021	97801.8	112357	101468	147959	143419	189997	142347	113236	81175.7	171887	129173	139188	136056	172495	146970	33040.5	Q6PE15	Abhd10		33040.5
33560.6	Q8K4F5	Abhd11	Protein ABHD11	ABHDB_MOUSE	3	3	5	5	5	3	4	4	6	5	5	6	4	3	4	4	5	5	5	5	47739.8	28535.7	168873	170882	108673	56783.9	89271.7	68968.7	147172	143918	146560	142160	87708.1	44516.4	128813	120981	81103.7	88212.9	150249	119029	33560.6	Q8K4F5	Abhd11		33560.6
45269.8	Q99LR1	Abhd12	Lysophosphatidylserine lipase ABHD12	ABD12_MOUSE	8	8	13	13	10	9	9	12	9	9	10	8	11	6	11	10	7	11	10	11	148998	116794	434670	328337	262859	238128	254716	225334	235507	258114	287170	205571	238035	109067	301459	280279	274467	363782	415274	343915	45269.8	Q99LR1	Abhd12		45269.8
38525.1	Q80UX8	Abhd13	Protein ABHD13	ABHDD_MOUSE	2	0	3	5	4	4	1	1	3	4	3	3	3	2	2	0	0	2	4	1	8204.82	NaN	32794.4	49106.1	37272.1	42086.7	10266.2	8514.23	30321.7	49577.5	38182.3	28275.2	23428.6	14232.1	23174.1	NaN	NaN	19774.7	28256.5	7514.73	38525.1	Q80UX8	Abhd13		38525.1
22450.7	Q8VCR7	Abhd14b	Putative protein-lysine deacylase ABHD14B	ABHEB_MOUSE	3	0	4	3	5	4	5	4	4	4	5	4	4	4	5	5	2	4	4	5	10785.2	NaN	29907.3	15377.8	41443.4	29781	50252.6	28825.8	39225	36957.6	58434	29063.9	50984.5	24962.5	84063.2	62975.6	36349	39874.1	58815.4	48002.8	22450.7	Q8VCR7	Abhd14b		22450.7
63086.2	Q9Z1Q2	Abhd16a	Phosphatidylserine lipase ABHD16A	ABHGA_MOUSE	6	6	10	13	9	10	10	8	8	8	10	9	10	8	11	8	6	9	11	9	90482.2	32803.7	283902	248662	192009	165816	209906	116842	176351	129971	259089	169176	211726	146918	248985	229692	75308.6	154365	233731	146507	63086.2	Q9Z1Q2	Abhd16a		63086.2
33949.77;33949.77-2	Q99JW1;Q99JW1-2	Abhd17a	Alpha/beta hydrolase domain-containing protein 17A;Isoform 2 of Alpha/beta hydrolase domain-containing protein 17A	AB17A_MOUSE	0	0	1	0	0	0	0	0	0	3	1	0	2	0	0	0	1	3	3	3	NaN	NaN	35550.3	NaN	NaN	NaN	NaN	NaN	NaN	53161	39330.4	NaN	16416.2	NaN	NaN	NaN	2500.914306640625	52270.8	76809.7	72300.6	33949.8	Q99JW1	Abhd17a		33949.8
32200.8	Q7M759	Abhd17b	Alpha/beta hydrolase domain-containing protein 17B	AB17B_MOUSE	9	0	11	10	11	7	9	7	9	11	8	8	10	10	9	9	9	10	11	12	107763	NaN	229901	174089	193110	164017	211076	155863	178888	217888	149570	180912	168056	118645	149863	210220	207542	265886	352666	315796	32200.8	Q7M759	Abhd17b		32200.8
48377.9	Q9QXM0	Abhd2	Monoacylglycerol lipase ABHD2	ABHD2_MOUSE	0	0	0	1	0	0	0	1	0	0	1	0	0	1	1	0	0	0	0	0	NaN	NaN	NaN	10551.4	NaN	NaN	NaN	6746.48	NaN	NaN	10295.6	NaN	NaN	6782.23	14653.6	NaN	NaN	NaN	NaN	NaN	48377.9	Q9QXM0	Abhd2		48377.9
38204.5;38204.5-2	Q8R2Y0;Q8R2Y0-2	Abhd6	Monoacylglycerol lipase ABHD6;Isoform 2 of Monoacylglycerol lipase ABHD6	ABHD6_MOUSE	8	8	7	8	9	7	9	9	7	8	9	7	8	7	8	8	7	9	9	8	120841	91041.1	241684	147254	211198	148443	219457	146731	188940	213928	232710	120964	173164	108665	232759	243326	111042	192811	251227	178371	38204.5	Q8R2Y0	Abhd6		38204.5
52287.51;52287.51-2;52287.51-3;52287.51-4;52287.51-5	Q8CBW3;Q8CBW3-2;Q8CBW3-3;Q8CBW3-4;Q8CBW3-5	Abi1	Abl interactor 1;Isoform 2 of Abl interactor 1;Isoform 3 of Abl interactor 1;Isoform 4 of Abl interactor 1;Isoform 5 of Abl interactor 1	ABI1_MOUSE	13	11	18	15	15	14	15	14	13	16	14	16	18	14	16	15	13	15	14	15	346252	285591	886064	562722	729892	701186	835769	614766	653212	755272	787384	683374	730704	540096	915090	802044	539169	491574	688296	496317	52287.5	Q8CBW3	Abi1		52287.5
39106.6	Q8BYZ1	Abi3	ABI gene family member 3	ABI3_MOUSE	9	8	11	9	10	7	8	9	8	10	9	10	10	7	9	9	8	12	11	10	95556.5	81474.8	283530	162553	186224	158523	177870	144957	147379	227524	190807	185342	243681	158617	250378	244139	311042	308581	389231	304440	39106.6	Q8BYZ1	Abi3		39106.6
21596.8	Q80ZQ9	Abitram	Protein Abitram	ABITM_MOUSE	6	6	7	6	8	7	8	7	9	8	8	7	8	6	8	8	7	7	8	7	62255.9	62379.6	171557	120003	151108	138319	169646	103007	176747	202994	224296	142693	153309	104033	221500	248829	110433	105713	168863	119055	21596.8	Q80ZQ9	Abitram		21596.8
122672.53;122672.53-2;122672.53-3;122672.53-4	P00520;P00520-2;P00520-3;P00520-4	Abl1	Tyrosine-protein kinase ABL1;Isoform II of Tyrosine-protein kinase ABL1;Isoform III of Tyrosine-protein kinase ABL1;Isoform IV of Tyrosine-protein kinase ABL1	ABL1_MOUSE	1	3	4	2	6	4	4	3	3	3	2	2	5	3	5	3	2	4	3	4	1876.58	263067	22308.3	18413.8	274670	166373	233778	196783	18766.4	17620.5	11381.8	4303.38	115539	274016	266636	240513	9910.62	269176	19741.3	17548.3	122673	P00520	Abl1		122673
128196	Q4JIM5	Abl2	Tyrosine-protein kinase ABL2	ABL2_MOUSE	9	0	11	8	8	6	7	6	8	9	7	7	10	7	11	8	3	5	6	6	44916.8	NaN	140935	61355.8	71837.9	45179.7	43479	36463.1	62394.3	85206.3	83993.1	52312.4	85136.9	45531.9	100126	78269.2	16786.8	17768.6	36428.5	37349.3	128196	Q4JIM5	Abl2		128196
62003.7	Q8K4G5-3	Ablim1	Isoform 3 of Actin-binding LIM protein 1	ABLM1_MOUSE	16	17	22	23	19	21	18	19	16	20	19	21	21	20	20	19	17	20	20	21	342351	336637	860075	612047	776376	757928	829584	680047	671663	772854	924463	733758	865381	626300	1.04106e+06	1.08131e+06	789008	988853	1224574	1.07627e+06	62003.7	Q8K4G5-3	Ablim1		62003.7
93772.9	Q5SSL4-4	Abr	Isoform 4 of Active breakpoint cluster region-related protein	ABR_MOUSE	0	0	8	5	7	3	6	6	3	6	5	5	7	5	7	7	4	8	12	9	NaN	NaN	70763.3	37954	44431.4	17651	37280.5	48975.4	22592.9	36885.3	43573.6	19050.4	54895.6	21975	74964.6	66365.9	45004.3	89845.7	146418	85238.6	93772.9	Q5SSL4-4	Abr		93772.9
9030.41	Q4KML4	Abracl	Costars family protein ABRACL	ABRAL_MOUSE	3	3	3	3	3	3	3	3	3	3	3	3	3	3	3	3	2	3	3	3	46601.5	26275.8	100925	53750.4	113903	88362.6	149738	109423	142541	181834	191992	97040.2	121295	65482.7	346722	344534	60741.2	80427.4	147444	104281	9030.41	Q4KML4	Abracl		9030.41
46039.1	Q8BPZ8	Abraxas1	BRCA1-A complex subunit Abraxas 1	ABRX1_MOUSE	8	5	11	9	11	10	9	7	9	9	10	11	10	8	8	9	8	10	12	10	65563.9	37621.9	229783	140750	119539	112957	137148	85048.9	136525	136360	148420	132858	150620	74970.3	138009	164361	141972	203786	260169	214520	46039.1	Q8BPZ8	Abraxas1		46039.1
46942.8	Q3TCJ1	Abraxas2	BRISC complex subunit Abraxas 2	ABRX2_MOUSE	7	10	13	11	12	13	11	12	13	12	10	10	12	12	13	13	11	11	14	11	108410	135169	389689	188435	247174	253992	279666	235791	271736	254480	285007	193173	265717	218868	356841	331932	224509	206242	337421	249069	46942.8	Q3TCJ1	Abraxas2		46942.8
30658.7	Q9QYL7	Abt1	Activator of basal transcription 1	ABT1_MOUSE	9	9	10	7	10	10	11	10	9	10	10	11	9	8	9	10	6	7	8	7	652221	532392	1.20332e+06	306283	850759	954023	1.03103e+06	766740	1.06224e+06	1.16465e+06	1.21836e+06	962893	1.09003e+06	697006	1.08473e+06	1.08834e+06	93127.6	117859	765905	113115	30658.7	Q9QYL7	Abt1		30658.7
43953.3	Q921H8	Acaa1a	3-ketoacyl-CoA thiolase A, peroxisomal	THIKA_MOUSE	16	15	18	17	16	18	17	16	17	16	17	17	18	14	16	16	17	18	18	17	604506	500606	1517542	1.2088e+06	1.0397e+06	955689	1280748	832378	974636	1.16871e+06	1.31622e+06	844118	1.01374e+06	639787	1.27803e+06	1.31707e+06	908317	1.29966e+06	1.78395e+06	1.35225e+06	43953.3	Q921H8	Acaa1a		43953.3
41829.9	Q8BWT1	Acaa2	3-ketoacyl-CoA thiolase, mitochondrial	THIM_MOUSE	19	18	21	21	20	20	21	20	20	21	20	19	20	19	20	19	20	21	21	20	1.12444e+06	914699	2739183	2393119	1.79502e+06	1.5763e+06	1.98834e+06	1.38896e+06	1.6276e+06	1.74834e+06	2.06556e+06	1.70077e+06	1618800	1.26214e+06	1.92164e+06	1.68828e+06	3.03111e+06	3068832	4168000	3.15898e+06	41829.9	Q8BWT1	Acaa2		41829.9
265257	Q5SWU9	Acaca	Acetyl-CoA carboxylase 1	ACACA_MOUSE	76	69	88	78	79	79	81	80	79	80	80	80	78	70	78	79	37	51	58	50	1.69879e+06	1.24058e+06	3.67753e+06	2.12725e+06	2.57908e+06	2.36748e+06	3.08663e+06	2316655	3.29654e+06	3.50986e+06	4.17894e+06	1.96551e+06	2.27811e+06	1.44446e+06	3143011	3.0934e+06	519480	670864	949919	665258	265257	Q5SWU9	Acaca		265257
118979	Q8K370	Acad10	Acyl-CoA dehydrogenase family member 10	ACD10_MOUSE	11	9	13	16	10	10	9	11	11	10	11	16	11	9	11	11	10	17	16	13	126724	102459	206585	272876	166853	196251	194295	152908	166640	185638	205808	246373	181204	121413	243985	203792	214059	334361	402683	343374	118979	Q8K370	Acad10		118979
87366.4	Q80XL6	Acad11	Acyl-CoA dehydrogenase family member 11	ACD11_MOUSE	6	4	9	8	9	8	8	6	7	10	11	7	11	5	7	8	0	5	6	5	34189.6	22565.1	112151	93612.6	105621	79908.8	116828	66382.4	63126.7	128462	176480	44478.3	140248	32738.9	92453.9	129063	NaN	57089.6	44327.6	49324.5	87366.4	Q80XL6	Acad11		87366.4
45019.8	Q9D7B6	Acad8	Isobutyryl-CoA dehydrogenase, mitochondrial	ACAD8_MOUSE	0	0	6	5	6	4	4	3	7	4	0	1	6	3	3	0	5	7	8	5	NaN	NaN	64253.1	50697.2	53550.1	50334.3	49797.9	23372.7	59355	36540.4	NaN	7571.76	54970.4	17806.6	34786.2	NaN	40281.3	57124.5	91078.3	36798.8	45019.8	Q9D7B6	Acad8		45019.8
68722.1	Q8JZN5	Acad9	Complex I assembly factor ACAD9, mitochondrial	ACAD9_MOUSE	25	26	28	27	26	26	25	25	26	26	26	25	25	26	25	25	22	25	26	25	1.26894e+06	976350	2.87088e+06	2393297	1.92069e+06	1.58894e+06	1.9754e+06	1.44066e+06	2276746	2.27567e+06	2.7176e+06	1.82341e+06	1.75984e+06	1.25758e+06	2.23264e+06	2.20396e+06	1.64744e+06	1.95404e+06	2455085	1.92937e+06	68722.1	Q8JZN5	Acad9		68722.1
47907.9	P51174	Acadl	Long-chain specific acyl-CoA dehydrogenase, mitochondrial	ACADL_MOUSE	14	15	18	16	16	14	16	15	15	15	14	16	14	16	16	15	14	15	15	15	2024607	1.67055e+06	4.0768e+06	3.4269e+06	3.41665e+06	2.90064e+06	3758721	2.51181e+06	2910338	3.26921e+06	3.76003e+06	2773045	2844102	2.18605e+06	3.65249e+06	3.57231e+06	3.42697e+06	4132646	5044230	4.22037e+06	47907.9	P51174	Acadl		47907.9
46481.2	P45952	Acadm	Medium-chain specific acyl-CoA dehydrogenase, mitochondrial	ACADM_MOUSE	15	15	16	16	16	15	15	16	14	14	15	15	15	13	13	15	13	16	16	14	853335	637370	1906017	1.40979e+06	1.28011e+06	1.09111e+06	1.37245e+06	945667	1.27621e+06	1.3454e+06	1.53335e+06	976101	1.14065e+06	766769	1.34051e+06	1.37562e+06	1.40198e+06	1.35555e+06	1.62887e+06	1.40104e+06	46481.2	P45952	Acadm		46481.2
44889.6	Q07417	Acads	Short-chain specific acyl-CoA dehydrogenase, mitochondrial	ACADS_MOUSE	14	14	16	16	14	15	14	15	15	15	15	13	14	15	15	15	15	15	15	15	643798	491833	1564275	1.32313e+06	1.15355e+06	933799	1.14327e+06	843887	990024	1.16441e+06	1.37661e+06	901405	1.017e+06	765268	1.33597e+06	1.26096e+06	1311206	1.48881e+06	1.92364e+06	1.43729e+06	44889.6	Q07417	Acads		44889.6
47874.1	Q9DBL1	Acadsb	Short/branched chain specific acyl-CoA dehydrogenase, mitochondrial	ACDSB_MOUSE	8	5	11	7	7	8	8	6	5	8	7	7	9	6	8	7	6	7	7	7	66423.4	46749.5	205990	131134	105129	76597.5	136299	61201.2	66618.4	122593	129546	80623.4	123303	67219	135933	131750	103098	102026	137794	117854	47874.1	Q9DBL1	Acadsb		47874.1
70875.5	P50544	Acadvl	Very long-chain specific acyl-CoA dehydrogenase, mitochondrial	ACADV_MOUSE	31	27	33	32	31	29	31	31	30	31	31	30	32	29	29	32	31	31	31	32	1.00864e+06	847257	2.46783e+06	1.52358e+06	1.58849e+06	1.29588e+06	1.68813e+06	1.26965e+06	1.53998e+06	1.72203e+06	2.00218e+06	1062599	1.59709e+06	919200	1.80392e+06	1.78516e+06	1.36511e+06	1.55888e+06	1917911	1.58326e+06	70875.5	P50544	Acadvl		70875.5
81704.1	Q8K2H4	Acap1	Arf-GAP with coiled-coil, ANK repeat and PH domain-containing protein 1	ACAP1_MOUSE	22	22	29	28	23	24	25	23	23	25	22	24	25	22	24	25	23	26	28	27	439759	315599	922776	732640	823146	774677	1.1221e+06	770928	898189	957240	1.04573e+06	717335	924295	642930	1.18265e+06	1.23157e+06	860516	1093145	1.51341e+06	1.29374e+06	81704.1	Q8K2H4	Acap1		81704.1
87210.8	Q6ZQK5	Acap2	Arf-GAP with coiled-coil, ANK repeat and PH domain-containing protein 2	ACAP2_MOUSE	16	15	18	17	21	18	20	20	18	19	21	18	18	16	19	19	14	18	20	17	215870	136689	453973	280366	458498	361017	521236	320644	389815	444741	557699	398144	419774	274020	542682	490006	306346	386830	632307	428904	87210.8	Q6ZQK5	Acap2		87210.8
44816.1	Q8QZT1	Acat1	Acetyl-CoA acetyltransferase, mitochondrial	THIL_MOUSE	14	15	19	20	16	16	16	15	13	16	16	17	17	15	14	16	15	17	16	15	1.61707e+06	1321190	3.87146e+06	2763803	2.48244e+06	2.25556e+06	2.8853e+06	2.04152e+06	2690814	3117431	3.43966e+06	2.23061e+06	2.46934e+06	1.73375e+06	3263246	3.33957e+06	3.3687e+06	4019104	5.01102e+06	3.99098e+06	44816.1	Q8QZT1	Acat1		44816.1
41297.7	Q8CAY6	Acat2	Acetyl-CoA acetyltransferase, cytosolic	THIC_MOUSE	12	10	13	12	10	10	10	12	10	10	11	10	10	10	11	10	7	9	9	10	759508	577474	1.48988e+06	938121	1180961	1.08413e+06	1.58598e+06	1.06703e+06	1.30476e+06	1.30097e+06	1.66635e+06	744838	697415	489367	1.06088e+06	985955	401387	428040	638718	442102	41297.7	Q8CAY6	Acat2		41297.7
60180.8	Q8BMP6	Acbd3	Golgi resident protein GCP60	GCP60_MOUSE	13	14	15	14	11	13	15	13	15	14	12	14	14	13	12	13	12	13	12	15	291540	215147	588257	436622	427945	488566	606049	423428	513438	569427	649503	482850	479132	338994	598529	581384	319663	412710	520808	463174	60180.8	Q8BMP6	Acbd3		60180.8
56613.73;56613.73-2;56613.73-3	Q5XG73;Q5XG73-2;Q5XG73-3	Acbd5	Acyl-CoA-binding domain-containing protein 5;Isoform 2 of Acyl-CoA-binding domain-containing protein 5;Isoform 3 of Acyl-CoA-binding domain-containing protein 5	ACBD5_MOUSE	5	5	7	7	6	5	6	7	7	8	8	9	6	4	4	8	4	7	8	6	32293.1	25678.2	81461.7	90383.3	58054.3	48768.2	65201.1	55461.6	53986.1	63138.4	88637.4	96204.1	55763.1	28362.4	42966.6	96253.3	29252.2	44249.7	75042.2	49747.2	56613.7	Q5XG73	Acbd5		56613.7
30887.5	Q9D061	Acbd6	Acyl-CoA-binding domain-containing protein 6	ACBD6_MOUSE	6	3	8	4	5	6	9	9	10	10	9	6	9	6	8	10	0	1	0	0	52011.1	11032.9	100102	23763.3	57025.7	52339.2	122158	91725.9	145633	142292	165815	32246.6	128355	48621.2	156846	175840	NaN	3934.561767578125	NaN	NaN	30887.5	Q9D061	Acbd6		30887.5
44713.1	Q5EE38	Acd	Adrenocortical dysplasia protein	ACD_MOUSE	6	4	10	11	7	9	10	8	10	8	9	10	11	8	8	8	5	8	9	8	46427.2	32155	132614	126866	94452.7	95785.2	111668	63581.1	122228	126478	141350	141068	124268	91212.9	127976	123989	66878.2	108557	136154	102922	44713.1	Q5EE38	Acd		44713.1
150718.97;150718.97-4	Q9JIX8;Q9JIX8-4	Acin1	Apoptotic chromatin condensation inducer in the nucleus;Isoform 4 of Apoptotic chromatin condensation inducer in the nucleus	ACINU_MOUSE	39	38	42	42	41	41	39	41	41	41	40	42	41	37	38	40	37	43	41	42	2.83119e+06	2.3217e+06	5.94224e+06	4721410	4.20573e+06	3.80493e+06	4448450	3.40762e+06	4687147	5047034	5.75245e+06	4.25e+06	3.9878e+06	2.92984e+06	4.96452e+06	4.99545e+06	4.18292e+06	4.83036e+06	5983047	5102690	150719	Q9JIX8	Acin1		150719
119728	Q91V92	Acly	ATP-citrate synthase	ACLY_MOUSE	49	50	55	55	50	52	52	53	50	51	52	52	53	50	48	48	45	44	47	47	6.29351e+06	5.04825e+06	13414306	9683299	10709104	9564082	12825629	9866308	10924579	11991451	13942258	8641411	7.23882e+06	5187619	9907884	9348619	4325069	4.50617e+06	6.28607e+06	4939040	119728	Q91V92	Acly		119728
98125.6	P28271	Aco1	Cytoplasmic aconitate hydratase	ACOHC_MOUSE	24	16	27	25	28	28	27	25	28	25	26	25	28	22	26	27	22	27	28	26	448174	248857	990402	530650	871561	778711	1.00104e+06	689510	871080	901453	1.07134e+06	475953	1343211	482297	975409	1.00899e+06	686109	729642	1.22028e+06	800116	98125.6	P28271	Aco1		98125.6
85463.5	Q99KI0	Aco2	Aconitate hydratase, mitochondrial	ACON_MOUSE	37	37	39	38	38	37	37	37	38	37	37	37	37	38	37	37	35	37	38	37	6.18072e+06	4921494	12314613	10220231	9572181	8.31558e+06	10355793	7.4947e+06	10050180	11199979	12640756	8675398	9029472	6800801	11738722	11459471	10299212	11238160	13860247	11083890	85463.5	Q99KI0	Aco2		85463.5
67354.6	Q8VHQ9	Acot11	Acyl-coenzyme A thioesterase 11	ACO11_MOUSE	0	0	0	0	2	3	2	2	1	1	0	0	1	0	1	0	1	1	0	1	NaN	NaN	NaN	NaN	17435.3	24727.4	12720	18592.6	2131.200439453125	4936.14	NaN	NaN	2837.926025390625	NaN	4677.13	NaN	6912.08	3868.22	NaN	2899.05	67354.6	Q8VHQ9	Acot11		67354.6
15182.8	Q9CQR4	Acot13	Acyl-coenzyme A thioesterase 13	ACO13_MOUSE	4	2	5	4	3	3	4	4	4	4	5	4	5	3	4	3	4	3	5	4	95478.1	67499.6	236437	213348	125634	124190	157019	124763	155562	193794	205671	175029	180565	122659	216667	203182	242137	206116	261549	203711	15182.8	Q9CQR4	Acot13		15182.8
49657	Q9QYR9	Acot2	Acyl-coenzyme A thioesterase 2, mitochondrial	ACOT2_MOUSE	14	15	17	18	15	16	15	15	14	15	16	15	16	14	15	15	12	15	16	16	797273	663143	1891625	1.60742e+06	1.24968e+06	1.12355e+06	1.32064e+06	933218	1.09343e+06	1.31927e+06	1.4033e+06	1.24638e+06	1.08652e+06	831143	1.42941e+06	1.32361e+06	1.78426e+06	1.86011e+06	2.40822e+06	1.8962e+06	49657	Q9QYR9	Acot2		49657
37555	Q91V12-2	Acot7	Isoform A of Cytosolic acyl coenzyme A thioester hydrolase	BACH_MOUSE	13	11	14	12	15	13	15	13	15	15	15	13	14	12	14	13	7	11	11	10	379793	235665	857720	332534	699602	559957	890757	672610	942925	964619	1.13554e+06	529706	803065	549757	1.13392e+06	1.07084e+06	146344	211639	312685	241869	37555	Q91V12-2	Acot7		37555
35827.1	P58137	Acot8	Acyl-coenzyme A thioesterase 8	ACOT8_MOUSE	7	6	8	7	7	8	6	7	8	10	8	9	8	4	7	7	5	5	7	6	55629.9	51932.2	186458	147368	108676	107340	91128.7	85641.7	105081	144854	130740	110605	84572.9	39194.3	116891	116381	61583.1	76584.4	115221	88700.1	35827.1	P58137	Acot8		35827.1
50560.5	Q9R0X4	Acot9	Acyl-coenzyme A thioesterase 9, mitochondrial	ACOT9_MOUSE	21	22	24	25	23	24	23	24	22	23	23	22	24	22	22	23	21	23	24	24	948894	745619	2.19667e+06	1.68706e+06	1.55734e+06	1.44707e+06	1.7536e+06	1.22572e+06	1.30737e+06	1.48081e+06	1.61842e+06	1.28568e+06	1.29255e+06	903211	1.5763e+06	1.64684e+06	1.47406e+06	1.72401e+06	2.21182e+06	1.97202e+06	50560.5	Q9R0X4	Acot9		50560.5
74648.72;74648.72-2	Q9R0H0;Q9R0H0-2	Acox1	Peroxisomal acyl-coenzyme A oxidase 1;Isoform 2 of Peroxisomal acyl-coenzyme A oxidase 1	ACOX1_MOUSE	9	9	17	22	11	14	15	13	11	9	11	15	12	7	11	11	0	5	6	0	41996.5	45761.5	177186	1475525	114492	942374	177401	745363	80457.5	77201.7	130862	192762	102955	54948.1	115722	103678	NaN	27880.7	32248.1	NaN	74648.7	Q9R0H0	Acox1		74648.7
78403.7	Q9EPL9	Acox3	Peroxisomal acyl-coenzyme A oxidase 3	ACOX3_MOUSE	19	17	24	21	20	20	23	20	19	19	21	23	23	21	20	20	16	26	27	25	358040	285078	1.17396e+06	729045	574317	523424	637610	466117	507401	590875	671900	556364	543261	411674	712412	676360	503154	856134	1.26836e+06	792880	78403.7	Q9EPL9	Acox3		78403.7
18191.7	Q9D358	Acp1	Low molecular weight phosphotyrosine protein phosphatase	PPAC_MOUSE	3	3	5	4	4	4	4	4	4	3	5	5	5	3	5	4	3	5	5	5	151790	101626	421871	182616	301030	244654	374072	312753	463746	390500	579093	335732	429103	228909	642765	443048	391635	332056	486908	346452	18191.7	Q9D358	Acp1		18191.7
17941.4	Q9D358-2	Acp1	Isoform 2 of Low molecular weight phosphotyrosine protein phosphatase	PPAC_MOUSE	1	0	1	1	1	1	1	1	1	1	1	0	1	1	1	1	1	1	1	1	11389.8	NaN	16120.2	11635.6	18904.4	23958	23336.6	18123.3	22766.2	22795.1	23016.5	NaN	22905.1	20819	25680.3	20577.8	14963.7	17877.7	21023.2	21500.6	17941.4	Q9D358-2	Acp1		17941.4
36807.1	Q05117	Acp5	Tartrate-resistant acid phosphatase type 5	PPA5_MOUSE	0	0	0	0	0	0	0	0	0	0	0	0	0	0	0	0	0	2	2	2	NaN	NaN	NaN	NaN	NaN	NaN	NaN	NaN	NaN	NaN	NaN	NaN	NaN	NaN	NaN	NaN	NaN	24437.4	25751.5	18667.2	36807.1	Q05117	Acp5		36807.1
47624.9	Q8BP40	Acp6	Lysophosphatidic acid phosphatase type 6	PPA6_MOUSE	9	8	11	10	8	8	7	10	8	9	9	9	9	8	8	8	9	10	10	9	154593	118877	326436	226112	216297	219095	212339	190134	194503	250629	294675	189279	192819	139355	255996	245667	379517	391970	460222	375132	47624.9	Q8BP40	Acp6		47624.9
67950.6	Q8VCW8	Acsf2	Medium-chain acyl-CoA ligase ACSF2, mitochondrial	ACSF2_MOUSE	20	19	21	21	19	20	20	19	19	20	20	18	19	19	20	19	19	20	20	21	2.52945e+06	1.98902e+06	5654434	5.32804e+06	4.00357e+06	3.44251e+06	4.38125e+06	3221205	3.52806e+06	3.80822e+06	4684343	3.9825e+06	3385614	2445639	4.58781e+06	4.38508e+06	5.85693e+06	6.31635e+06	8248322	6.54501e+06	67950.6	Q8VCW8	Acsf2		67950.6
65076.7	Q3URE1	Acsf3	Malonate--CoA ligase ACSF3, mitochondrial	ACSF3_MOUSE	14	15	18	15	16	13	14	17	17	13	16	13	17	13	14	17	12	16	17	16	138765	153350	338953	210036	241941	188183	253535	239014	273734	234488	334473	159564	225783	124293	295554	352616	233706	312441	389060	307141	65076.7	Q3URE1	Acsf3		65076.7
77951.5	P41216	Acsl1	Long-chain-fatty-acid--CoA ligase 1	ACSL1_MOUSE	16	15	21	23	18	19	19	16	16	18	18	19	20	16	20	18	15	19	20	20	199959	155500	460976	424458	346136	293758	343923	248848	331732	362201	427806	296776	314215	203302	446766	391854	258943	417115	488259	395219	77951.5	P41216	Acsl1		77951.5
80492.4	Q9CZW4	Acsl3	Fatty acid CoA ligase Acsl3	ACSL3_MOUSE	17	17	20	20	17	19	17	16	19	17	19	17	16	14	17	16	10	14	14	9	286877	209756	684067	589890	361674	398225	379853	288323	459517	406539	519266	308710	269849	173180	313815	304513	114976	155919	202334	104322	80492.4	Q9CZW4	Acsl3		80492.4
79076.96;79076.96-2	Q9QUJ7;Q9QUJ7-2	Acsl4	Long-chain-fatty-acid--CoA ligase 4;Isoform Short of Long-chain-fatty-acid--CoA ligase 4	ACSL4_MOUSE	27	23	29	30	27	27	27	28	26	28	27	28	30	24	26	26	18	21	23	19	740554	544220	1.67833e+06	2.0342e+06	1.04937e+06	1.09496e+06	1.19491e+06	859565	1.1536e+06	1.33037e+06	1.48297e+06	1.10678e+06	852357	523247	1.02249e+06	945459	220497	320111	442134	334746	79077	Q9QUJ7	Acsl4		79077
76206.4	Q8JZR0	Acsl5	Long-chain-fatty-acid--CoA ligase 5	ACSL5_MOUSE	24	23	27	27	24	25	26	25	26	23	26	24	25	24	25	25	18	26	25	25	610605	468675	1.3908e+06	1.29567e+06	949237	887997	1.02149e+06	742253	1.019e+06	1.05498e+06	1.27063e+06	977880	890064	656064	1.15774e+06	1084345	656188	904877	1172506	908949	76206.4	Q8JZR0	Acsl5		76206.4
78017.24;78017.24-2	Q91WC3;Q91WC3-2	Acsl6	Long-chain-fatty-acid--CoA ligase 6;Isoform 2 of Long-chain-fatty-acid--CoA ligase 6	ACSL6_MOUSE	0	0	1	1	0	0	1	0	1	1	0	0	1	0	1	0	1	1	1	1	NaN	NaN	40126.1	34332.9	NaN	NaN	27197	NaN	26070.4	27399.1	NaN	NaN	36934.7	NaN	30628.5	NaN	20503.6	26943.7	34656	30648.8	78017.2	Q91WC3	Acsl6		78017.2
74623.3	Q99NB1	Acss1	Acetyl-coenzyme A synthetase 2-like, mitochondrial	ACS2L_MOUSE	20	21	23	22	23	23	23	22	21	22	23	24	24	20	22	22	21	24	24	23	613137	540049	1.25455e+06	1.17676e+06	1.10427e+06	1.00055e+06	1.19428e+06	814450	840081	1.05709e+06	1.23569e+06	1.06568e+06	853667	609910	1.23119e+06	1.12096e+06	1.41054e+06	1.86779e+06	2.30586e+06	1.88537e+06	74623.3	Q99NB1	Acss1		74623.3
78862	Q9QXG4	Acss2	Acetyl-coenzyme A synthetase, cytoplasmic	ACSA_MOUSE	6	4	8	11	9	7	9	4	8	5	8	7	9	5	7	6	11	11	10	11	43962.5	16498	101725	84323.8	107257	59463.3	119294	26047.6	83444.7	44357.4	100333	47640.8	83788.2	27172	86635.9	52083	148341	106076	139439	120261	78862	Q9QXG4	Acss2		78862
42051	P68134	Acta1	Actin, alpha skeletal muscle	ACTS_MOUSE	1	1	1	1	1	1	1	1	1	1	1	0	1	1	1	1	1	1	1	1	79725.5	46725.6	111687	109362	93543.7	102168	104602	83336.4	100805	84108.4	77388.8	NaN	114126	93595.6	88917.4	105438	127803	127207	138452	107852	42051	P68134	Acta1		42051
42008.9	P62737	Acta2	Actin, aortic smooth muscle	ACTA_MOUSE	4	4	5	4	4	6	7	5	6	7	7	5	4	6	5	6	3	6	6	4	11358798	8631130	20281818	18863930	21639906	19890610	27132600	16338535	22624038	23726632	28194696	25679730	21654378	18044112	29100710	25546316	12715597	26579810	32480706	25326316	42008.9	P62737	Acta2		42008.9
41736.7	P60710	Actb	Actin, cytoplasmic 1	ACTB_MOUSE	33	32	36	37	36	34	34	36	34	36	36	36	34	32	35	35	30	35	35	35	182995056	145975024	418830240	372973824	358760480	335969120	393172992	305342912	376658016	407532192	458995584	399997184	364710208	283580256	456521632	452855616	439870304	392171648	535567552	422566784	41736.7	P60710	Actb		41736.7
42004.2	Q8BFZ3	Actbl2	Beta-actin-like protein 2	ACTBL_MOUSE	3	1	4	2	4	4	4	3	5	2	3	3	5	3	5	3	2	5	5	4	860902	441234	678322	502990	1.57081e+06	1.448e+06	1.59055e+06	990056	1.27975e+06	1.47398e+06	1.67887e+06	1.30233e+06	1.56059e+06	1090191	1.88112e+06	1.70627e+06	1.31844e+06	1.44259e+06	1.85366e+06	1.5676e+06	42004.2	Q8BFZ3	Actbl2		42004.2
41792.8	P63260	Actg1	Actin, cytoplasmic 2	ACTG_MOUSE	1	1	1	1	1	1	1	1	1	1	1	1	1	1	1	1	1	1	1	1	1.99805e+06	1.3761e+06	3699948	4.23171e+06	3688043	3.73336e+06	4.14337e+06	2.80259e+06	4.04415e+06	4532013	5.3115e+06	4526415	3908942	3.68992e+06	4995398	4.79727e+06	4864513	4259582	6680976	4735560	41792.8	P63260	Actg1		41792.8
47448	Q9Z2N8	Actl6a	Actin-like protein 6A	ACL6A_MOUSE	15	15	18	17	18	18	18	19	17	18	18	17	18	17	17	18	14	17	20	17	952415	765940	2.11627e+06	1.56985e+06	1.57725e+06	1538212	1.79525e+06	1397958	1812053	1.967e+06	2223156	1.4976e+06	1.5121e+06	1.17044e+06	2.10291e+06	2.04215e+06	1.56625e+06	1.8436e+06	2.4143e+06	1.88215e+06	47448	Q9Z2N8	Actl6a		47448
103068	Q7TPR4	Actn1	Alpha-actinin-1	ACTN1_MOUSE	26	21	35	33	27	25	29	30	29	32	31	32	30	26	34	32	32	37	40	37	1.67009e+06	1213311	3.11761e+06	2.29982e+06	3.1165e+06	2.69374e+06	3.69953e+06	2.67058e+06	3.59708e+06	4047897	4721131	2.99241e+06	3.15329e+06	2.28991e+06	4.6967e+06	4.66533e+06	2.49384e+06	2.87208e+06	4.47498e+06	3.57952e+06	103068	Q7TPR4	Actn1		103068
103834	Q9JI91	Actn2	Alpha-actinin-2	ACTN2_MOUSE	0	0	2	0	0	0	0	0	0	0	0	0	0	0	0	0	0	0	0	0	NaN	NaN	14071.6	NaN	NaN	NaN	NaN	NaN	NaN	NaN	NaN	NaN	NaN	NaN	NaN	NaN	NaN	NaN	NaN	NaN	103834	Q9JI91	Actn2		103834
104977	P57780	Actn4	Alpha-actinin-4	ACTN4_MOUSE	33	33	38	41	35	37	36	38	35	38	38	39	39	35	38	37	33	36	37	37	2.76443e+06	2.06314e+06	5.21387e+06	3.75905e+06	4.99964e+06	4.33561e+06	5.60497e+06	4271146	5.64455e+06	6.21697e+06	7120639	5083729	5169038	3.91024e+06	6913641	6.61309e+06	4.37116e+06	4.47121e+06	6500414	4.96038e+06	104977	P57780	Actn4		104977
46207.9	Q9QZB7	Actr10	Actin-related protein 10	ARP10_MOUSE	13	12	16	11	13	15	15	15	13	15	15	10	14	13	15	15	8	13	13	15	147955	103035	370977	185737	281157	282973	358343	315125	309488	326692	392712	223958	290427	211190	447993	423751	162886	196576	303185	234016	46207.9	Q9QZB7	Actr10		46207.9
42613.7	P61164	Actr1a	Alpha-centractin	ACTZ_MOUSE	15	15	15	15	15	15	15	14	15	14	14	14	16	13	14	15	14	15	14	14	564650	437627	1.12079e+06	787289	1.07715e+06	974572	1.21687e+06	864184	1083678	1.13208e+06	1.26464e+06	856268	977128	760584	1.32335e+06	1.26486e+06	868847	917246	1.28633e+06	998742	42613.7	P61164	Actr1a		42613.7
42281.3	Q8R5C5	Actr1b	Beta-centractin	ACTY_MOUSE	4	4	5	5	5	4	5	4	6	5	6	5	6	4	6	5	3	3	6	5	61150.7	49657.1	123831	99170.3	112432	93580.4	127397	90937.9	138629	136355	155161	101678	108824	74491.9	157844	150904	87349.8	89149.7	140167	112167	42281.3	Q8R5C5	Actr1b		42281.3
44760.8	P61161	Actr2	Actin-related protein 2	ARP2_MOUSE	16	16	17	17	17	17	17	17	17	17	17	17	17	16	17	17	13	16	17	17	5.28654e+06	3.88781e+06	10093599	7853096	9010662	7864817	10110453	7.29221e+06	9330991	10240895	11560793	8954388	9012853	6.89245e+06	11810361	11482432	8.1456e+06	9541945	13111926	10735211	44760.8	P61161	Actr2		44760.8
47357.2	Q99JY9	Actr3	Actin-related protein 3	ARP3_MOUSE	23	23	25	25	24	24	24	24	24	24	25	25	25	22	23	24	20	24	25	23	6.08768e+06	4.66803e+06	12125026	9893887	10512114	9649253	12237049	8881852	11081604	12115397	13609670	10398630	10780210	7768087	13990303	13099610	10834860	11317978	15997247	12405659	47357.2	Q99JY9	Actr3		47357.2
67844.8	Q80US4	Actr5	Actin-related protein 5	ARP5_MOUSE	10	11	14	11	11	10	11	9	13	13	13	14	11	8	11	12	10	14	13	12	101827	83085.3	251321	186525	163885	135087	157239	102669	180050	211912	239991	184833	166288	109409	210484	189132	140173	179526	237606	171759	67844.8	Q80US4	Actr5		67844.8
45785	Q9D864	Actr6	Actin-related protein 6	ARP6_MOUSE	6	0	7	5	5	4	5	4	5	5	5	3	7	3	6	6	4	5	6	5	39288.2	NaN	73515.2	45911.6	56990.1	39749.5	61620.2	28094.9	53517.7	59574.4	75707.7	30286.7	58263.1	24731.8	75453.7	74744.2	22102.8	47523.1	61374.7	58905.7	45785	Q9D864	Actr6		45785
70545.7	Q8R2S9	Actr8	Actin-related protein 8	ARP8_MOUSE	16	13	13	12	13	16	14	12	16	14	13	16	16	14	13	14	13	14	14	14	167906	103619	289585	217838	220918	252013	263149	142520	299789	293545	302493	291107	243729	187608	302249	278907	217085	236207	261352	244979	70545.7	Q8R2S9	Actr8		70545.7
45781	Q99JW2	Acy1	Aminoacylase-1	ACY1_MOUSE	13	13	13	13	13	14	14	14	13	14	15	14	13	13	14	14	12	13	14	13	371024	296769	727924	471812	577369	553356	695162	465244	766875	881072	951276	633102	687625	524472	962431	884604	484811	469186	685217	480116	45781	Q99JW2	Acy1		45781
11240.7	P56376	Acyp1	Acylphosphatase-1	ACYP1_MOUSE	5	5	6	6	6	6	5	6	6	7	6	6	6	6	6	5	5	6	6	7	107640	67402.2	335627	199514	249121	210025	290875	233315	311518	369619	363539	288151	353288	289564	417247	364997	311378	411255	604818	393652	11240.7	P56376	Acyp1		11240.7
11877.6	P56375	Acyp2	Acylphosphatase-2	ACYP2_MOUSE	0	1	1	1	1	1	1	1	0	1	0	1	1	1	1	1	1	1	1	0	NaN	2907.001708984375	5812.05	7576.64	4034.668212890625	4306.61	10154.5	6485.39	NaN	7893.52	NaN	5772.14	6235.14	6206.09	9295.36	7832.83	2580.95	3895.519775390625	5523.47	NaN	11877.6	P56375	Acyp2		11877.6
39991.6	P03958	Ada	Adenosine deaminase	ADA_MOUSE	10	9	13	13	12	14	15	11	14	13	15	13	16	12	13	15	12	13	14	14	153547	96929	328009	156117	288305	307387	429337	258606	382089	437174	527743	261542	405620	244568	572022	479906	441336	315557	687735	461658	39991.6	P03958	Ada		39991.6
41000.8	Q80SY6	Adal	Adenosine deaminase-like protein	ADAL_MOUSE	0	0	3	1	2	0	2	0	2	2	0	1	0	0	2	3	0	2	3	2	NaN	NaN	16246.6	5906.38	9135.46	NaN	14205.3	NaN	9871.16	10195.2	NaN	4024.41	NaN	NaN	13234	22248.5	NaN	11294.3	23577.7	10067.4	41000.8	Q80SY6	Adal		41000.8
83968.1	O35598	Adam10	Disintegrin and metalloproteinase domain-containing protein 10	ADA10_MOUSE	19	15	24	17	20	19	21	19	21	22	21	17	22	19	20	20	14	18	18	18	292770	192924	766479	457950	469697	422972	537553	387927	451601	507086	608779	335140	466876	294176	520056	561112	223857	252098	318858	276854	83968.1	O35598	Adam10		83968.1
93056.1	Q9Z0F8	Adam17	Disintegrin and metalloproteinase domain-containing protein 17	ADA17_MOUSE	12	9	17	14	15	14	14	14	14	12	15	15	15	14	14	14	12	14	12	12	118845	92717.2	276215	286429	228851	197311	248084	171437	283175	222147	316566	192004	213707	152555	319547	308747	155983	213337	271164	178915	93056.1	Q9Z0F8	Adam17		93056.1
92079.4	Q61072	Adam9	Disintegrin and metalloproteinase domain-containing protein 9	ADAM9_MOUSE	1	0	8	4	6	4	6	7	8	8	8	6	6	4	8	7	0	4	2	0	6692.04	NaN	81218.2	20329.8	52756.7	44998.8	73223.5	54520.1	76800.6	88696.4	92671.1	34361.1	64997.8	35826.6	85662.8	87985.8	NaN	29028.7	14842.8	NaN	92079.4	Q61072	Adam9		92079.4
43370.3	E9PY16	Adap1	E9ArfGAP with dual PH domains 1	E9PY16_MOU	9	3	10	5	10	10	11	11	6	8	7	10	8	4	9	9	7	10	11	12	72670	22317	169176	30169.8	175667	138355	208910	194002	69522.7	86252	88396.1	123107	78230.5	35116.6	132138	126478	99412.8	138113	216867	194578	43370.3	E9PY16	Adap1		43370.3
130447	Q99MU3	Adar	Double-stranded RNA-specific adenosine deaminase	DSRAD_MOUSE	23	19	28	18	31	27	31	29	31	31	33	24	33	24	33	32	19	32	30	32	266890	160999	652178	175236	586082	400895	713226	531855	620388	712702	855820	263543	668439	335749	949344	1.03628e+06	280749	508627	618494	608901	130447	Q99MU3	Adar		130447
55355	Q9JHI2	Adat1	tRNA-specific adenosine deaminase 1	ADAT1_MOUSE	5	3	7	5	7	7	7	6	8	7	7	5	8	4	7	7	4	6	8	5	39623.2	11738.5	87183.8	29937.7	68551.4	91344.2	80187.1	38511.2	110717	125274	119478	45268.7	68918.9	37686	117173	108740	43921.6	72554.9	122325	53675.6	55355	Q9JHI2	Adat1		55355
21308.5	Q6P6J0	Adat2	tRNA-specific adenosine deaminase 2	ADAT2_MOUSE	0	0	1	0	5	2	2	2	4	2	0	1	4	0	3	3	4	1	2	5	NaN	NaN	8324.22	NaN	43270.7	14802.5	12615.8	7964.75	37657.5	21589.7	NaN	3438.5	37876.4	NaN	21956.4	28675.8	39643.5	3566.76	18812.8	36281.6	21308.5	Q6P6J0	Adat2		21308.5
37516.7	Q6PAT0	Adat3	Probable inactive tRNA-specific adenosine deaminase-like protein 3	ADAT3_MOUSE	3	1	6	3	4	6	5	4	3	6	4	3	6	3	5	6	4	6	5	3	16813.6	9552.07	66302.2	21888.8	40405.2	34270.9	55472.2	30959.2	45975.5	60887	55150.6	23056.5	47935.3	24407.8	61932.1	55311.8	41961.3	44434.2	53669	34846.5	37516.7	Q6PAT0	Adat3		37516.7
59735.9	Q9D0L4	Adck1	AarF domain-containing protein kinase 1	ADCK1_MOUSE	8	9	13	11	11	10	13	8	11	11	11	8	13	10	9	11	4	12	10	11	137169	98932.5	313853	158820	226203	188642	303525	152207	264300	254324	342904	115376	262892	144223	249128	269830	84728.4	181984	217654	198104	59735.9	Q9D0L4	Adck1		59735.9
66654.45;66654.45-2	Q80V03;Q80V03-2	Adck5	Uncharacterized aarF domain-containing protein kinase 5;Isoform 2 of Uncharacterized aarF domain-containing protein kinase 5	ADCK5_MOUSE	0	0	2	0	0	0	0	0	0	0	0	0	0	0	0	2	0	0	0	0	NaN	NaN	9961.55	NaN	NaN	NaN	NaN	NaN	NaN	NaN	NaN	NaN	NaN	NaN	NaN	13423.2	NaN	NaN	NaN	NaN	66654.4	Q80V03	Adck5		66654.4
122708	P51829	Adcy7	Adenylate cyclase type 7	ADCY7_MOUSE	3	0	6	5	7	5	7	3	4	4	5	5	6	5	5	5	3	10	12	9	14973.9	NaN	46395	37255.7	49196.6	28622.6	55688.8	19799.7	21197.4	20275.8	27967.1	24902.1	32169.3	28228.7	34040.5	45334.7	33463.5	65068.3	86833.5	61323.1	122708	P51829	Adcy7		122708
80646.5	Q9QYC0	Add1	Alpha-adducin	ADDA_MOUSE	21	21	25	24	22	21	22	22	22	21	23	23	24	20	23	21	19	21	22	22	838104	642046	1.8647e+06	1426108	1.93633e+06	1.59592e+06	1.98858e+06	1.50047e+06	1.42689e+06	1.51136e+06	1.74119e+06	1.56338e+06	1.39436e+06	1.07123e+06	1873868	1.77907e+06	2.30554e+06	2.46016e+06	3.26716e+06	2.64289e+06	80646.5	Q9QYC0	Add1		80646.5
78777.1	Q9QYB5	Add3	Gamma-adducin	ADDG_MOUSE	17	17	22	21	19	20	19	19	19	20	18	20	20	17	18	17	19	20	19	20	723209	563800	2.38022e+06	1.31435e+06	2.29012e+06	2.0122e+06	2.319e+06	1.88237e+06	1.71596e+06	2.15199e+06	1825049	1.92686e+06	1.87089e+06	1.16222e+06	1.94003e+06	1.83153e+06	2233976	2684804	3.49957e+06	2.58953e+06	78777.1	Q9QYB5	Add3		78777.1
75406.6	Q9QYB5-2	Add3	Isoform 1 of Gamma-adducin	ADDG_MOUSE	0	0	0	2	1	0	1	1	0	1	0	2	0	0	1	0	1	2	1	1	NaN	NaN	NaN	11381.9	20396.7	NaN	26093.4	2325.112060546875	NaN	21752.2	NaN	8566.12	NaN	NaN	3996.75	NaN	28291.2	41271.6	54380.5	52546.8	75406.6	Q9QYB5-2	Add3		75406.6
90413.4	Q9Z0M6	Adgre5	Adhesion G protein-coupled receptor E5	AGRE5_MOUSE	13	12	17	15	17	17	16	16	9	10	12	13	13	9	10	12	10	11	10	10	511130	436729	1.16264e+06	558134	1.34964e+06	1.02267e+06	1256034	1059347	320926	369949	439333	354487	385821	248210	520315	526168	382934	483139	513495	424808	90413.4	Q9Z0M6	Adgre5		90413.4
39547.7	P28474	Adh5	Alcohol dehydrogenase class-3	ADHX_MOUSE	14	15	16	15	15	14	14	15	14	13	15	14	13	14	15	14	13	13	13	13	1.14824e+06	882930	2557403	1.47314e+06	2.13844e+06	1.82162e+06	2.56287e+06	1812156	2.32979e+06	2.50704e+06	2787210	1.81908e+06	2.22163e+06	1.69406e+06	3.11191e+06	2763431	2.82325e+06	2.39917e+06	3.4447e+06	2.66787e+06	39547.7	P28474	Adh5		39547.7
21523.5	Q99JT9	Adi1	Acireductone dioxygenase	MTND_MOUSE	6	5	6	5	4	6	6	7	6	7	7	6	8	6	6	7	6	6	7	5	86948.4	51714.6	152787	36761.5	101573	97797.7	130778	107362	173604	251140	215098	102112	210177	127116	271967	283787	127568	97623.4	160277	113024	21523.5	Q99JT9	Adi1		21523.5
19476.2	Q9D1K7	Adissp	Adipose-secreted signaling protein	ADSSP_MOUSE	2	1	4	2	4	3	4	4	4	4	3	4	4	2	4	4	3	3	4	5	31351.4	12145	78559	57603.7	70578.4	61564.7	88997.9	64933.3	93027.1	86230.9	69689.1	68905.2	79815.8	42695.5	94304.7	74158.1	51676.8	60028.7	84295.8	78229.7	19476.2	Q9D1K7	Adissp		19476.2
40148.8	P55264	Adk	Adenosine kinase	ADK_MOUSE	10	10	11	10	11	11	11	11	11	11	11	12	11	11	11	11	11	10	10	10	354364	267463	817648	468929	634632	606810	786233	555046	747097	855168	950740	597662	745275	519862	928421	819950	658655	550019	881307	645091	40148.8	P55264	Adk		40148.8
124308	Q9Z103	Adnp	Activity-dependent neuroprotector homeobox protein	ADNP_MOUSE	24	18	29	22	25	27	25	27	25	25	27	23	28	23	26	26	22	26	26	23	350079	260343	950868	465165	608488	534741	607276	502218	729123	754236	927569	416647	668004	370923	895077	840244	632047	675486	905287	669080	124308	Q9Z103	Adnp		124308
126768	Q8CHC8	Adnp2	Activity-dependent neuroprotector homeobox protein 2	ADNP2_MOUSE	3	0	3	2	3	4	4	0	4	3	3	0	4	1	4	1	2	3	3	4	22789	NaN	42179.5	12640.4	36625.8	38412.5	96795.6	NaN	39531.7	34616.4	49410.9	NaN	34621.3	8449.42	48033.8	15059.7	13785.2	37884.3	34355	39093.8	126768	Q8CHC8	Adnp2		126768
28372.4	Q6PDY2	Ado	2-aminoethanethiol dioxygenase	AEDO_MOUSE	9	7	10	7	9	9	8	9	10	10	10	9	9	8	9	9	8	11	11	10	162231	109099	272706	129108	272810	208748	249601	250194	262188	332974	320841	179695	205011	178120	346276	315809	220700	259990	354356	303701	28372.4	Q6PDY2	Ado		28372.4
53902.46;53902.46-3	Q8VDL4;Q8VDL4-3	Adpgk	ADP-dependent glucokinase;Isoform 3 of ADP-dependent glucokinase	ADPGK_MOUSE	13	13	13	13	13	13	13	13	13	13	13	13	13	13	13	13	12	12	13	12	519070	409563	1.0986e+06	985137	763464	752598	875536	619669	722611	819503	966433	765444	678120	503268	886247	830977	581188	728844	937328	787631	53902.5	Q8VDL4	Adpgk		53902.5
40068.3	P54923	Adprh	ADP-ribosylhydrolase ARH1	ADPRH_MOUSE	12	11	14	13	12	12	12	12	13	13	13	14	13	12	12	12	12	11	13	12	450591	325395	1113018	881121	801162	790106	979120	726849	953074	1.02948e+06	1.10083e+06	1.02579e+06	1.05362e+06	707115	1.23852e+06	1181318	762924	788498	1.1809e+06	1.01489e+06	40068.3	P54923	Adprh		40068.3
39414.2	Q8CG72	Adprs	ADP-ribosylhydrolase ARH3	ADPRS_MOUSE	8	9	9	9	11	10	10	10	10	10	10	10	10	8	10	10	11	9	10	10	235060	192885	592848	396305	451538	436754	581582	393997	510438	537761	612029	454770	487185	284167	631121	625097	681205	480192	844132	602650	39414.2	Q8CG72	Adprs		39414.2
42060.1	Q9JKV1	Adrm1	Proteasomal ubiquitin receptor ADRM1	ADRM1_MOUSE	8	9	8	8	8	8	9	9	8	8	9	8	8	8	8	8	8	8	8	8	582407	552667	1.35416e+06	1.04228e+06	1.05181e+06	1.13335e+06	1.18926e+06	1.07456e+06	1.33264e+06	1.3942e+06	1.64839e+06	1.15505e+06	1.08666e+06	891496	1.466e+06	1.37513e+06	615292	684477	900901	646396	42060.1	Q9JKV1	Adrm1		42060.1
54866.2	P54822	Adsl	Adenylosuccinate lyase	PUR8_MOUSE	21	20	21	18	21	22	24	23	22	22	23	22	22	23	24	22	14	19	22	19	766111	509468	1.45214e+06	842137	1322465	1.18487e+06	1.68829e+06	1.11712e+06	1679954	1.69551e+06	2.05065e+06	1112057	1.57839e+06	1.06312e+06	2.05219e+06	1887578	857731	908219	1.39199e+06	980700	54866.2	P54822	Adsl		54866.2
50254.44;50254.44-2	P28650;P28650-2	Adss1	Adenylosuccinate synthetase isozyme 1;Isoform 2 of Adenylosuccinate synthetase isozyme 1	PURA1_MOUSE	9	9	10	8	11	12	11	12	11	12	11	11	10	8	12	11	11	11	13	13	74041.1	75189.6	147864	83607	170137	182891	223934	142121	169142	224776	235496	175521	175520	100316	250991	203625	289595	327432	516862	385685	50254.4	P28650	Adss1		50254.4
50021	P46664	Adss2	Adenylosuccinate synthetase isozyme 2	PURA2_MOUSE	17	18	20	17	17	18	17	18	16	18	18	17	18	17	18	18	14	17	18	17	1.16607e+06	829566	1992877	975847	1.94298e+06	1.65381e+06	2364755	1.64183e+06	2.40796e+06	2565252	2827068	1.53262e+06	2.02067e+06	1.55903e+06	2.8316e+06	2.72527e+06	1.00471e+06	984715	1.56126e+06	1.10503e+06	50021	P46664	Adss2		50021
52963.03;52963.03-2;52963.03-5	Q9Z248;Q9Z248-2;Q9Z248-5	Aebp2	Zinc finger protein AEBP2;Isoform 2 of Zinc finger protein AEBP2;Isoform 5 of Zinc finger protein AEBP2	AEBP2_MOUSE	2	2	6	4	5	4	5	4	6	5	7	6	7	4	7	7	0	2	3	2	23618.2	20648.3	82242.3	47813.9	60436	55687.6	77153.1	58839.1	104380	104608	136390	63419.6	92217.1	56027.7	128576	137924	NaN	10295	23860.3	18386.8	52963	Q9Z248	Aebp2		52963
37309.22;37309.22-2	Q9CZI9;Q9CZI9-2	Aen	Apoptosis-enhancing nuclease;Isoform 2 of Apoptosis-enhancing nuclease	AEN_MOUSE	4	5	6	7	6	5	5	6	5	6	6	6	6	5	6	6	0	0	0	0	62169.2	60510.9	231420	287310	119606	136423	114044	96495.4	183796	241732	302767	243388	156646	118907	203294	206292	NaN	NaN	NaN	NaN	37309.2	Q9CZI9	Aen		37309.2
131558	O88573	Aff1	AF4/FMR2 family member 1	AFF1_MOUSE	0	0	2	8	1	0	4	0	0	2	4	8	0	0	0	0	0	0	4	2	NaN	NaN	15527.4	69893.8	3190.69	NaN	23003.4	NaN	NaN	11945.9	29413.2	76311.3	NaN	NaN	NaN	NaN	NaN	NaN	31562.6	9001.28	131558	O88573	Aff1		131558
136131	P51827	Aff3	AF4/FMR2 family member 3	AFF3_MOUSE	0	0	8	8	9	7	10	6	7	7	9	7	10	7	9	7	8	10	9	9	NaN	NaN	90522.7	319926	233869	269445	245873	142312	207346	166240	232482	173375	313991	134836	353931	235171	282122	284436	373887	348387	136131	P51827	Aff3		136131
126639	Q9ESC8	Aff4	AF4/FMR2 family member 4	AFF4_MOUSE	6	6	8	11	7	3	6	6	5	5	6	10	6	7	5	5	2	6	8	4	36648.6	27339	78713.2	99233.5	50865.9	20544.2	51092.1	27887.7	51235.6	47532.5	65941.7	77313	34801.9	38140.4	52389.3	42700.7	25963.8	35513.9	50158.2	23792.1	126639	Q9ESC8	Aff4		126639
54313.2	Q3V384	Afg1l	AFG1-like ATPase	AFG1L_MOUSE	4	0	7	6	6	0	4	7	6	4	6	1	0	4	3	6	3	9	11	10	28685.5	NaN	52703.2	49195.2	50629.4	NaN	22665.6	49394.4	49223.5	42384.8	43996.8	6211.85	NaN	42581.9	25587.1	65040	47474.9	87324.2	146744	114171	54313.2	Q3V384	Afg1l		54313.2
97255.8	Q3UMC0	Afg2a	ATPase family gene 2 protein homolog A	AFG2A_MOUSE	32	35	36	37	37	37	37	37	39	37	39	40	38	34	38	39	18	25	24	26	655106	537486	1.42924e+06	1.25805e+06	1.13134e+06	1.1207e+06	1.32464e+06	941521	1425368	1.49923e+06	1.84646e+06	1.4282e+06	1.21536e+06	889303	1.61286e+06	1.52388e+06	295925	305120	484934	431727	97255.8	Q3UMC0	Afg2a		97255.8
80742.2	A0A7N9VSG0	Afg2b	ATPase family gene 2 protein homolog B	AFG2B_MOUSE	6	7	15	12	12	11	12	9	10	12	14	14	11	11	13	11	0	5	8	9	21810.2	26988.3	148534	94371.6	137369	172714	122088	88601.5	105231	160635	217709	153523	116989	85723.4	226978	149134	NaN	28170.3	45073.9	131390	80742.2	A0A7N9VSG0	Afg2b		80742.2
87046.7	Q920A7	Afg3l1	AFG3-like protein 1	AFG31_MOUSE	17	16	22	23	19	17	20	21	19	19	21	15	17	16	18	15	8	12	16	16	224971	192812	548552	362722	391307	374386	376299	356402	415108	387610	506830	212593	363701	233205	428280	361599	120769	143315	232827	231211	87046.7	Q920A7	Afg3l1		87046.7
89518.8	Q8JZQ2	Afg3l2	AFG3-like protein 2	AFG32_MOUSE	26	26	31	29	28	28	27	28	29	29	31	29	25	30	27	27	27	26	28	30	606063	506677	1.63165e+06	1.35551e+06	902516	917018	990317	685895	1.13338e+06	1.16381e+06	1.40874e+06	1.01493e+06	860251	734354	1.0742e+06	1.09818e+06	729705	977497	1.24666e+06	1.06035e+06	89518.8	Q8JZQ2	Afg3l2		89518.8
101130.56;101130.56-2	Q80WT5;Q80WT5-2	Aftph	Aftiphilin;Isoform 2 of Aftiphilin	AFTIN_MOUSE	14	13	15	12	17	17	15	17	17	18	17	13	17	17	18	17	14	14	17	14	138122	82919.3	271747	129618	260607	217031	261624	217476	274029	324822	323870	179635	254510	183835	379872	323340	177324	198987	282023	188310	101131	Q80WT5	Aftph		101131
37022	Q64191	Aga	N(4)-(beta-N-acetylglucosaminyl)-L-asparaginase	ASPG_MOUSE	0	0	2	3	0	2	0	0	4	2	0	0	0	3	0	1	2	2	3	2	NaN	NaN	37650.7	35982.7	NaN	28119.5	NaN	NaN	64320.6	26588.8	NaN	NaN	NaN	25108.9	NaN	13017.1	18887.9	22072.5	48257.3	24729.1	37022	Q64191	Aga		37022
124510.59;124510.59-2	Q3UHD9;Q3UHD9-2	Agap2	Arf-GAP with GTPase, ANK repeat and PH domain-containing protein 2;Isoform 2 of Arf-GAP with GTPase, ANK repeat and PH domain-containing protein 2	AGAP2_MOUSE	9	5	11	12	11	10	10	12	10	9	11	11	12	11	10	11	10	13	14	10	74242.6	27977.3	148914	107398	139998	129314	170027	133017	138089	126094	179536	112169	153817	123465	209716	199344	163749	194578	283835	202893	124511	Q3UHD9	Agap2		124511
97965.2	Q8VHH5	Agap3	Arf-GAP with GTPase, ANK repeat and PH domain-containing protein 3	AGAP3_MOUSE	5	2	8	6	7	9	9	7	8	8	8	6	8	6	8	8	4	3	6	0	23994.6	5861.21	72927	29415.3	57291.1	63684.3	88628.5	49015	58310	72708.4	81119	32976.5	58712.5	31906.4	77724	64123.6	21240.2	12139	30985	NaN	97965.2	Q8VHH5	Agap3		97965.2
58042.84;58042.84-1;58042.84-3	Q8K2K6;Q8K2K6-1;Q8K2K6-3	Agfg1	Arf-GAP domain and FG repeat-containing protein 1;Isoform 1 of Arf-GAP domain and FG repeat-containing protein 1;Isoform 3 of Arf-GAP domain and FG repeat-containing protein 1	AGFG1_MOUSE	10	10	13	11	11	11	11	10	10	10	13	10	10	10	9	10	9	11	12	11	237000	218729	615530	374423	430344	386515	512320	363547	488022	532938	656169	321960	466639	297259	545832	599102	297969	334459	474544	369668	58042.8	Q8K2K6	Agfg1		58042.8
48968.03;48968.03-2	Q80WC7;Q80WC7-2	Agfg2	Arf-GAP domain and FG repeat-containing protein 2;Isoform 2 of Arf-GAP domain and FG repeat-containing protein 2	AGFG2_MOUSE	5	4	6	7	7	8	8	6	7	8	7	8	8	5	6	7	3	7	6	6	59747	39292.3	119309	124014	104347	125684	146972	94265.5	154178	167578	186130	108045	116404	67293.8	142988	174800	67813.3	81179.9	126460	87958.9	48968	Q80WC7	Agfg2		48968
79445.3	Q7TN31	Aggf1	Angiogenic factor with G patch and FHA domains 1	AGGF1_MOUSE	0	0	2	0	0	0	2	0	4	4	4	4	0	3	4	5	0	3	2	0	NaN	NaN	27181.6	NaN	NaN	NaN	11196.8	NaN	45733.6	44041.2	37882.6	19190.7	NaN	19675.5	44725.5	56269.8	NaN	25339.1	5860.51	NaN	79445.3	Q7TN31	Aggf1		79445.3
46976	Q9ESW4	Agk	Acylglycerol kinase, mitochondrial	AGK_MOUSE	17	17	16	16	15	17	18	15	15	17	17	16	16	16	15	17	15	18	18	17	503517	406233	1.17101e+06	814097	754440	641086	820240	596264	752667	837513	899922	621136	658340	433350	849943	896252	687908	892234	1.16877e+06	911152	46976	Q9ESW4	Agk		46976
97214.3	Q8CJG1	Ago1	Protein argonaute-1	AGO1_MOUSE	26	22	32	27	26	28	26	24	25	25	26	29	30	25	24	25	25	30	30	28	442445	338201	1.0632e+06	705538	857719	834103	914275	731705	796716	868949	1.00434e+06	912636	826132	642784	986543	922273	884948	1.00371e+06	1.35311e+06	1.13737e+06	97214.3	Q8CJG1	Ago1		97214.3
97304.2	Q8CJG0	Ago2	Protein argonaute-2	AGO2_MOUSE	24	24	28	26	28	27	29	27	29	30	29	28	28	26	27	27	23	27	29	27	654436	711263	1.69484e+06	1.66725e+06	1.80795e+06	1.6641e+06	2.05079e+06	1.43931e+06	1.92556e+06	2.13964e+06	2.27854e+06	1.69609e+06	1.74298e+06	1265472	2.3325e+06	1.45603e+06	1.36254e+06	1.70798e+06	2.21554e+06	1.82326e+06	97304.2	Q8CJG0	Ago2		97304.2
31709.3	O35083	Agpat1	1-acyl-sn-glycerol-3-phosphate acyltransferase alpha	PLCA_MOUSE	3	4	5	5	4	5	4	4	4	4	4	4	5	5	4	5	3	5	4	4	53664.9	67080.7	170533	176967	104835	109660	127741	91860	110730	107140	149886	98505.2	109496	79600.4	108026	130662	122184	155642	164657	138751	31709.3	O35083	Agpat1		31709.3
31010.6	Q8K3K7	Agpat2	1-acyl-sn-glycerol-3-phosphate acyltransferase beta	PLCB_MOUSE	4	3	4	4	4	4	3	3	4	3	3	3	3	2	5	4	4	3	5	5	26149	25070.9	64408.5	43858.5	46177.3	45518.2	29002.2	22035.8	56866.7	36466.9	30783.2	26716.2	31174.4	21600.8	59896.8	59896.2	39079.8	22295.6	67139.9	64782.9	31010.6	Q8K3K7	Agpat2		31010.6
43295.8	Q9D517	Agpat3	1-acyl-sn-glycerol-3-phosphate acyltransferase gamma	PLCC_MOUSE	9	10	13	12	12	11	10	11	12	11	11	12	12	10	12	11	10	11	12	11	185173	171135	406502	375150	362667	293185	320402	279084	348131	344278	393318	338543	282023	211468	410393	383723	282008	362676	428995	322631	43295.8	Q9D517	Agpat3		43295.8
43810.4	Q8K4X7	Agpat4	1-acyl-sn-glycerol-3-phosphate acyltransferase delta	PLCD_MOUSE	8	6	10	9	9	7	8	8	9	7	7	8	9	4	8	7	4	8	8	7	83062.2	64138.6	232860	155845	151338	120728	168444	122964	143778	153992	167860	121202	86439.5	43202	165666	129765	51306.7	99454.4	142045	95677.4	43810.4	Q8K4X7	Agpat4		43810.4
42202.3	Q9D1E8	Agpat5	1-acyl-sn-glycerol-3-phosphate acyltransferase epsilon	PLCE_MOUSE	3	3	8	9	3	4	3	4	4	4	5	4	4	6	4	4	1	2	3	0	31802.9	24037.6	128250	106806	45960.1	41567.3	27253.2	37844.7	85746.1	83978.4	103255	77911.1	53866.7	57576.6	75971	72386.5	9516.96	5602.26	27353.5	NaN	42202.3	Q9D1E8	Agpat5		42202.3
71683.5	Q8C0I1	Agps	Alkyldihydroxyacetonephosphate synthase, peroxisomal	ADAS_MOUSE	21	22	25	24	22	23	22	22	23	23	23	22	22	20	22	23	15	19	21	22	599469	472007	1.32359e+06	861799	883082	756628	956471	734199	959319	1.08877e+06	1.2781e+06	663024	828997	529181	1.08752e+06	1059500	350917	500774	721161	594303	71683.5	Q8C0I1	Agps		71683.5
137196.92;137196.92-2;137196.92-3;137196.92-4;137196.92-5	Q641K1;Q641K1-2;Q641K1-3;Q641K1-4;Q641K1-5	Agtpbp1	Cytosolic carboxypeptidase 1;Isoform 2 of Cytosolic carboxypeptidase 1;Isoform 3 of Cytosolic carboxypeptidase 1;Isoform 4 of Cytosolic carboxypeptidase 1;Isoform 5 of Cytosolic carboxypeptidase 1	CBPC1_MOUSE	0	0	0	3	2	2	0	1	0	0	0	0	3	0	3	0	0	0	0	0	NaN	NaN	NaN	12715.6	16039.3	12626.3	NaN	4048.156982421875	NaN	NaN	NaN	NaN	16192.3	NaN	21183.6	NaN	NaN	NaN	NaN	NaN	137197	Q641K1	Agtpbp1		137197
247646	Q8CJF7	Ahctf1	Protein ELYS	ELYS_MOUSE	66	59	75	68	70	72	69	67	75	72	77	70	71	63	73	69	49	65	69	65	1.22965e+06	939002	2605918	1.86899e+06	1.85085e+06	1.68995e+06	1.88663e+06	1.35089e+06	2.35707e+06	2.48255e+06	2.99406e+06	1671309	1.78379e+06	1296806	2.42559e+06	2341309	1.0253e+06	1.34948e+06	1.72676e+06	1.39412e+06	247646	Q8CJF7	Ahctf1		247646
47688.2	P50247	Ahcy	Adenosylhomocysteinase	SAHH_MOUSE	24	23	29	29	23	24	25	24	26	27	23	28	30	22	27	24	22	28	25	27	6230906	4356236	11890785	8501808	10708073	9079029	12493906	8388849	12072100	12904907	14165324	10576380	10498742	8232821	14251820	13492718	11524903	11397242	15947516	12627034	47688.2	P50247	Ahcy		47688.2
58951.4	Q80SW1	Ahcyl1	S-adenosylhomocysteine hydrolase-like protein 1	SAHH2_MOUSE	8	6	9	9	9	7	7	8	8	9	9	8	8	8	9	9	7	6	8	8	192986	56638.5	392991	284194	367601	145114	374067	272938	401589	432140	498740	350324	338334	234152	497719	491340	239917	104646	174630	293492	58951.4	Q80SW1	Ahcyl1		58951.4
66899.4	Q68FL4	Ahcyl2	Putative adenosylhomocysteinase 3	SAHH3_MOUSE	17	16	20	20	19	19	18	16	18	19	21	20	20	17	18	19	17	18	18	17	393230	304900	1.07589e+06	723967	865865	793458	1.03216e+06	579161	999983	899080	1.25123e+06	770736	912184	688325	1.19274e+06	1.14233e+06	673764	620364	769558	709435	66899.4	Q68FL4	Ahcyl2		66899.4
168081	Q6PAL7	Ahdc1	Transcription factor Gibbin	AHDC1_MOUSE	0	0	4	0	5	6	5	5	5	6	4	0	6	3	7	6	10	12	14	9	NaN	NaN	26018.8	NaN	35387.7	62393	27527.2	25182.2	36242.4	37694.2	44919.9	NaN	37276	11565.5	64616.3	48619.5	114396	123420	180940	83599.2	168081	Q6PAL7	Ahdc1		168081
604253	E9Q616	Ahnak	E9AHNAK nucleoprotein (desmoyokin)	E9Q616_MOU	45	45	74	68	87	68	84	95	56	60	64	73	59	45	64	62	75	109	108	99	531599	460211	1.36056e+06	1.00487e+06	1.51233e+06	1013311	1.59059e+06	1.70432e+06	812352	893747	1.25125e+06	1.06827e+06	726622	557665	1.31474e+06	1.34809e+06	1.47157e+06	2235577	2.77957e+06	2257760	604253	E9Q616	Ahnak		604253
368474	A0A7N9VR94	Ahnak2	A0A7N9AHNAK nucleoprotein 2	A0A7N9VR94	0	0	0	0	0	0	0	1	0	0	0	0	0	0	1	0	1	1	0	1	NaN	NaN	NaN	NaN	NaN	NaN	NaN	14410.7	NaN	NaN	NaN	NaN	NaN	NaN	6344.15	NaN	5449.76	4707.9	NaN	11613.9	368474	A0A7N9VR94	Ahnak2		368474
95017	P30561	Ahr	Aryl hydrocarbon receptor	AHR_MOUSE	0	2	1	1	0	1	2	1	2	2	1	2	4	2	4	2	0	0	0	1	NaN	18309.8	13427.1	18995.9	NaN	20902.1	41769.8	11041.2	48209.9	31584.8	29168.5	24247.6	57172.1	38516.1	63763.3	75978.7	NaN	NaN	NaN	14676	95017	P30561	Ahr		95017
38117.1	Q8BK64	Ahsa1	Activator of 90 kDa heat shock protein ATPase homolog 1	AHSA1_MOUSE	20	19	20	18	19	18	18	19	20	21	20	19	20	19	19	18	16	18	19	18	1.64461e+06	1.25513e+06	3.28975e+06	1.9388e+06	2.64017e+06	2.45419e+06	3396669	2.32465e+06	3827972	4045730	4.70855e+06	2.8895e+06	3.29128e+06	2450581	4.35382e+06	4.16478e+06	1.26731e+06	1548646	2.2391e+06	1.653e+06	38117.1	Q8BK64	Ahsa1		38117.1
37648.2	Q8N9S3	Ahsa2	Activator of 90 kDa heat shock protein ATPase homolog 2	AHSA2_MOUSE	6	5	8	7	6	6	8	6	7	8	8	5	8	7	8	7	3	4	4	6	59448.8	43511.7	171846	114047	105294	94557.4	150916	90107.8	166870	190544	258229	120350	131959	116130	210087	197628	28028.8	35211.8	37953.2	51925.1	37648.2	Q8N9S3	Ahsa2		37648.2
37325.6	P29699	Ahsg	Alpha-2-HS-glycoprotein	FETUA_MOUSE	1	0	1	1	1	1	1	2	1	1	1	1	1	1	1	1	1	2	1	1	174488	NaN	139453	380585	59288.6	74809.5	87772.6	56973.7	61777.8	94628.7	87776.4	82137.6	44139	66818.9	74907	183813	30418.1	434939	132908	262839	37325.6	P29699	Ahsg		37325.6
34888	Q8C4Q6	Aida	Axin interactor, dorsalization-associated protein	AIDA_MOUSE	6	5	8	8	9	9	7	7	6	7	6	7	6	8	8	8	8	7	8	8	54396.6	44376.6	146864	101901	174288	125165	153150	130097	94196.7	117873	114192	84124	105920	94281.3	147366	145109	165915	125785	206686	162738	34888	Q8C4Q6	Aida		34888
66765.5	Q9Z0X1	Aifm1	Apoptosis-inducing factor 1, mitochondrial	AIFM1_MOUSE	21	20	24	24	23	22	22	21	22	23	23	23	21	21	23	21	19	22	24	21	1.36854e+06	1175251	3.08665e+06	2.74578e+06	1.97068e+06	1.82067e+06	2.01103e+06	1.53777e+06	2.35696e+06	2.52877e+06	2.807e+06	2.20549e+06	1.99711e+06	1.38933e+06	2.41709e+06	2.38258e+06	1.81117e+06	2.2093e+06	2682224	2.24034e+06	66765.5	Q9Z0X1	Aifm1		66765.5
40155.1	Q91VJ1	Aim2	Interferon-inducible protein AIM2	AIM2_MOUSE	16	14	17	17	16	14	15	14	18	16	16	17	16	16	15	15	11	14	16	17	236645	198691	441468	364654	409604	360258	466551	308487	519335	504329	603672	533556	416495	359937	529604	526723	221336	267621	394667	337501	40155.1	Q91VJ1	Aim2		40155.1
33997.2	P31230	Aimp1	Aminoacyl tRNA synthase complex-interacting multifunctional protein 1	AIMP1_MOUSE	16	16	21	18	17	19	18	17	18	20	20	17	21	18	18	18	12	15	17	15	1.08607e+06	773328	2277182	1051216	1.62779e+06	1.57752e+06	1.94574e+06	1.41041e+06	2.30817e+06	2.35273e+06	2.53957e+06	1.08847e+06	1974897	1.42284e+06	2.41959e+06	2.30873e+06	702447	771586	1034527	895486	33997.2	P31230	Aimp1		33997.2
35377.6	Q8R010	Aimp2	Aminoacyl tRNA synthase complex-interacting multifunctional protein 2	AIMP2_MOUSE	10	11	11	13	12	12	11	11	11	11	12	11	11	11	10	11	7	9	10	9	505142	411696	1.2486e+06	850652	832953	862206	1.00582e+06	842194	1.10678e+06	1.21997e+06	1.42202e+06	843782	904010	686825	1.2674e+06	1.21619e+06	262418	351833	484661	347582	35377.6	Q8R010	Aimp2		35377.6
37604.9	O08915	Aip	AH receptor-interacting protein	AIP_MOUSE	15	14	15	14	14	14	15	15	15	14	14	15	14	13	15	14	14	13	15	14	490854	349079	1.00681e+06	754103	866480	839034	1.15365e+06	801542	911250	1.03823e+06	1.1438e+06	952423	931725	679145	1237734	1.09238e+06	636498	597950	909682	642210	37604.9	O08915	Aip		37604.9
26468.7;26468.7-2	Q9WTP6;Q9WTP6-2	Ak2	Adenylate kinase 2, mitochondrial;Isoform 2 of Adenylate kinase 2, mitochondrial	KAD2_MOUSE	13	14	14	14	14	14	14	14	14	14	14	14	14	14	14	14	13	13	13	13	1.9637e+06	1651940	3886287	2.98278e+06	2.51135e+06	2.33205e+06	2.89578e+06	2.33383e+06	3.61384e+06	3.91031e+06	4401979	2.65753e+06	3.00661e+06	2.21977e+06	3.87492e+06	3.90579e+06	1.8327e+06	2050229	2298185	1.98475e+06	26468.7	Q9WTP6	Ak2		26468.7
25426.3	Q9WTP7	Ak3	GTP:AMP phosphotransferase AK3, mitochondrial	KAD3_MOUSE	11	13	15	14	13	12	12	12	11	13	12	13	12	13	13	13	11	13	14	12	386571	351257	905283	847000	701713	589983	691788	570320	659548	821700	807150	692576	734337	538507	890208	880192	1.05395e+06	1.17056e+06	1.37508e+06	1.00869e+06	25426.3	Q9WTP7	Ak3		25426.3
19947.4	Q8VCP8	Ak6	Adenylate kinase isoenzyme 6	KAD6_MOUSE	0	0	2	1	2	2	3	2	3	3	3	2	2	2	3	3	0	0	0	0	NaN	NaN	51825.3	39973.3	32507.2	32035.2	61856.5	30372.9	67266.5	93227.8	84021.5	51819.3	63577.8	40114.7	102937	97042.8	NaN	NaN	NaN	NaN	19947.4	Q8VCP8	Ak6		19947.4
92194.71;92194.71-2;92194.71-3;92194.71-4;92194.71-5;92194.71-6	O08715;O08715-2;O08715-3;O08715-4;O08715-5;O08715-6	Akap1	A-kinase anchor protein 1, mitochondrial;Isoform 1 of A-kinase anchor protein 1, mitochondrial;Isoform 2 of A-kinase anchor protein 1, mitochondrial;Isoform 4 of A-kinase anchor protein 1, mitochondrial;Isoform 5 of A-kinase anchor protein 1, mitochondrial;Isoform 6 of A-kinase anchor protein 1, mitochondrial	AKAP1_MOUSE	0	0	3	0	0	0	2	0	0	4	4	0	0	1	4	4	0	0	0	0	NaN	NaN	16012.9	NaN	NaN	NaN	11632	NaN	NaN	34354.3	42562.6	NaN	NaN	2161.427490234375	33910.8	34402.1	NaN	NaN	NaN	NaN	92194.7	O08715	Akap1		92194.7
73632	O88845	Akap10	A-kinase anchor protein 10, mitochondrial	AKA10_MOUSE	4	2	8	5	5	5	5	5	5	5	5	6	6	6	6	6	3	5	6	5	23037	4717.88	99587.6	44928.7	32432.9	64229.2	51444.7	42732	84967.7	87593.7	100774	81793.5	84466.1	60700.2	110402	101671	21311.8	58668.3	109293	53601.9	73632	O88845	Akap10		73632
208761	E9Q777	Akap11	E9A kinase (PRKA) anchor protein 11	E9Q777_MOU	8	7	20	16	12	14	14	10	17	17	19	19	18	16	19	17	8	12	13	11	44396.4	26980.5	178661	177636	87574.1	127407	139440	73641.7	164588	217155	222131	200551	180164	127372	243152	209894	56411	73400	126745	89504.5	208761	E9Q777	Akap11		208761
180695	Q9WTQ5	Akap12	A-kinase anchor protein 12	AKA12_MOUSE	30	24	27	33	38	36	36	33	32	35	36	33	42	36	38	40	34	44	43	38	275523	242231	460670	514283	732216	686173	782483	513522	513250	748209	673798	481164	735438	498770	844261	882497	958434	1.45236e+06	1.53017e+06	1.11557e+06	180695	Q9WTQ5	Akap12		180695
301499	E9Q394-2	Akap13	Isoform 2 of A-kinase anchor protein 13	AKP13_MOUSE	42	29	58	59	59	52	49	54	51	58	56	62	62	45	55	49	48	60	59	58	425529	254163	1.02834e+06	1124614	937536	807015	911993	712430	820594	999238	1.10594e+06	1.29428e+06	963323	710743	1.20296e+06	983734	916375	1.08317e+06	1.41923e+06	1.07898e+06	301499	E9Q394-2	Akap13		301499
76293.9	Q9DBR0	Akap8	A-kinase anchor protein 8	AKAP8_MOUSE	18	16	17	16	21	20	20	20	21	22	21	17	20	18	21	21	15	21	21	20	557875	415162	1.19104e+06	599902	867694	732166	898309	712154	1.04478e+06	1.088e+06	1.29376e+06	497341	943519	539367	1.15788e+06	1.11183e+06	854438	971119	1182252	893722	76293.9	Q9DBR0	Akap8		76293.9
71453.7	Q9R0L7	Akap8l	A-kinase anchor protein 8-like	AKP8L_MOUSE	12	14	15	13	13	14	10	12	12	12	10	14	15	11	13	12	13	16	15	15	173814	174750	507844	256813	293620	269844	187630	244954	284737	346559	341636	311444	283381	160767	364787	342438	349955	493215	601563	508120	71453.7	Q9R0L7	Akap8l		71453.7
NaN;NaN-2	Q70FJ1;Q70FJ1-2	Akap9	A-kinase anchor protein 9;Isoform 2 of A-kinase anchor protein 9	AKAP9_MOUSE	26	20	46	38	42	45	45	29	47	43	53	38	49	29	47	35	26	43	54	45	141891	92747.4	455696	263751	331150	344154	429640	235400	405864	429930	622596	256711	374696	194142	507703	384805	222223	347433	528382	388501	436214	Q70FJ1	Akap9		436214
22113.1	B1AXD8	Akirin2	Akirin-2	AKIR2_MOUSE	0	0	5	0	0	1	3	0	4	4	3	2	7	3	3	4	0	0	0	0	NaN	NaN	74043.2	NaN	NaN	18111.8	26226.5	NaN	46285.8	40777.9	40041	18969.6	67496.6	18042.6	53931.3	46794.5	NaN	NaN	NaN	NaN	22113.1	B1AXD8	Akirin2		22113.1
153123	Q80VW7	Akna	Microtubule organization protein AKNA	AKNA_MOUSE	24	19	30	30	27	27	24	26	28	29	24	24	29	23	27	29	20	28	30	22	230529	156159	512243	351090	441130	365228	359033	370610	393632	473290	462635	313734	422790	268377	478760	508821	233502	446524	526340	335500	153123	Q80VW7	Akna		153123
36586.9	Q9JII6	Akr1a1	AK1Aldo-keto reductase family 1 member A1	AK1A1_MO	14	15	15	15	14	15	14	15	15	14	15	14	15	15	14	15	13	14	15	15	415204	314272	879819	636062	725013	654078	914766	716465	847463	823303	990599	795101	810203	621922	1.0599e+06	1.04521e+06	835594	720694	1.17149e+06	897594	36586.9	Q9JII6	Akr1a1		36586.9
35732.2	P45376	Akr1b1	Aldo-keto reductase family 1 member B1	ALDR_MOUSE	24	22	24	24	25	25	25	24	25	25	25	25	25	24	24	25	25	25	25	25	3.86362e+06	2717549	7785170	5.13255e+06	6.97292e+06	6.12617e+06	8096154	5893037	7.1483e+06	7591562	8596850	6.20903e+06	6.98645e+06	5236337	9116644	8.36522e+06	8950934	8.27801e+06	12009432	9068777	35732.2	P45376	Akr1b1		35732.2
35848.25;35848.3	G5E895;Q8BIV6	Akr1b10	G5Aldo-keto reductase family 1, member B10 (aldose reductase);Q8NADP-dependent oxidoreductase domain-containing protein	G5E895_MOU;Q8BIV6_MOU	12	8	12	11	13	15	13	13	14	13	13	14	14	12	14	13	11	16	16	14	123406	73782.2	254978	167972	239181	211680	253831	152254	197553	216943	240159	215938	231793	146355	248827	293139	280167	298672	440006	321032	35848.2	G5E895	Akr1b10		35848.2
34460.7	Q9DCT1	Akr1e2	1,5-anhydro-D-fructose reductase	AKCL2_MOUSE	0	0	0	0	3	0	3	0	3	5	5	0	0	1	6	3	2	3	5	4	NaN	NaN	NaN	NaN	20705.9	NaN	23610.5	NaN	29522.1	36600.9	59279.1	NaN	NaN	9050.86	77186.1	20667.7	15243.1	15150.6	52242.6	27613.2	34460.7	Q9DCT1	Akr1e2		34460.7
40612.1	Q8CG76	Akr7a2	Aflatoxin B1 aldehyde reductase member 2	ARK72_MOUSE	11	10	11	9	12	11	11	11	11	13	11	11	11	11	12	11	11	12	11	11	267944	200361	627653	340797	516308	458255	539636	372697	475771	592459	545401	469017	513925	367219	701607	574388	498520	663260	839892	680393	40612.1	Q8CG76	Akr7a2		40612.1
55707.3	P31750	Akt1	RAC-alpha serine/threonine-protein kinase	AKT1_MOUSE	12	12	17	15	16	16	16	16	14	16	16	15	14	13	16	15	12	15	14	15	154329	116721	434170	197205	394504	381139	486475	347744	377768	504863	533793	322354	346660	291141	589090	527427	189763	303147	425963	376537	55707.3	P31750	Akt1		55707.3
27483.4	Q9D1F4	Akt1s1	Proline-rich AKT1 substrate 1	AKTS1_MOUSE	3	0	3	3	4	4	4	2	3	5	4	4	2	4	4	4	0	3	2	2	21445.5	NaN	55503.3	42912.7	30090.4	48156.5	61788.2	11333	37875.9	54000.8	45174.7	37600.6	39980.7	44709	52197.9	63518.7	NaN	23969.2	23118.1	20636.8	27483.4	Q9D1F4	Akt1s1		27483.4
55741.7	Q60823	Akt2	RAC-beta serine/threonine-protein kinase	AKT2_MOUSE	7	6	9	9	10	10	10	9	9	9	10	11	9	10	10	11	9	11	9	10	93172.9	61438.7	219312	142927	252928	325535	276250	207903	216131	271700	291201	250541	218890	185804	344795	365901	154383	304435	246650	240299	55741.7	Q60823	Akt2		55741.7
55714.41;55714.41-2	Q9WUA6;Q9WUA6-2	Akt3	RAC-gamma serine/threonine-protein kinase;Isoform 2 of RAC-gamma serine/threonine-protein kinase	AKT3_MOUSE	1	0	1	0	1	3	3	1	0	1	1	3	0	0	3	2	0	0	2	0	8658.52	NaN	11448.1	NaN	15367.6	14280.6	18821.1	13129.5	NaN	9547.67	8887.29	29246.2	NaN	NaN	28503.7	27325.3	NaN	NaN	30101.3	NaN	55714.4	Q9WUA6	Akt3		55714.4
32941.8	Q64362	Aktip	AKT-interacting protein	AKTIP_MOUSE	0	2	3	1	3	3	3	3	3	3	3	2	3	2	3	2	0	3	3	3	NaN	4238.09	21587	8418.93	15668	21083.6	25434.5	19250.5	25702.1	26493	19249.8	15562.2	14044.9	14822.3	36167.2	25061.5	NaN	15528	21576.2	15292.5	32941.8	Q64362	Aktip		32941.8
36023.5	P10518	Alad	Delta-aminolevulinic acid dehydratase	HEM2_MOUSE	13	11	12	10	13	12	14	14	14	15	14	13	15	14	14	13	11	15	14	14	202328	144993	429586	231193	364720	303672	447935	317102	457890	499295	596854	309727	456587	316887	659498	606778	402153	373795	577463	417892	36023.5	P10518	Alad		36023.5
71017.5	Q8VC19	Alas1	5-aminolevulinate synthase, non-specific, mitochondrial	HEM1_MOUSE	6	0	8	6	6	9	6	6	7	10	9	8	10	6	7	7	0	2	3	0	46224.2	NaN	91338.3	51003.2	82950	120345	84553.4	45390.2	124203	219720	152274	133930	112512	44952.8	141697	131643	NaN	19246.2	30971.3	NaN	71017.5	Q8VC19	Alas1		71017.5
68692.5	P07724	Alb	Albumin	ALBU_MOUSE	5	5	9	13	7	7	12	9	8	6	9	8	9	9	10	8	19	22	23	22	2936843	3.66807e+06	3.23408e+06	10110530	1.35698e+06	1.41595e+06	2.60122e+06	1.0095e+06	1.51097e+06	2122046	2.61689e+06	4.9301e+06	4.42699e+06	1.24487e+06	1.53327e+06	2.23356e+06	1.85826e+06	4417129	2.65887e+06	2.71972e+06	68692.5	P07724	Alb		68692.5
65092.1	Q61490	Alcam	CD166 antigen	CD166_MOUSE	10	9	13	13	11	12	10	9	11	11	11	11	11	10	8	9	0	8	6	4	218529	213698	510912	557599	349451	378515	359954	213160	330447	345257	422674	457847	278231	268911	234157	255089	NaN	95984.2	110719	44362.4	65092.1	Q61490	Alcam		65092.1
84755.8	Q571I9	Aldh16a1	A16Aldehyde dehydrogenase family 16 member A1	A16A1_MO	14	15	18	15	14	17	15	16	14	15	15	14	16	14	14	15	14	14	16	16	305451	246369	602066	365391	567006	511274	657706	464506	558938	654452	682222	439693	608606	421970	728297	709050	498175	455747	686280	479890	84755.8	Q571I9	Aldh16a1		84755.8
87266.3	Q9Z110	Aldh18a1	Delta-1-pyrroline-5-carboxylate synthase	P5CS_MOUSE	33	33	39	39	34	37	37	35	36	36	36	38	36	34	37	34	23	32	32	31	2.16868e+06	1.75015e+06	4.40186e+06	3691780	3.22141e+06	2.79622e+06	3.45063e+06	2.63543e+06	3.24227e+06	3.49691e+06	4064053	3.08354e+06	2.49302e+06	1.91226e+06	3.52778e+06	3.40075e+06	993813	1.17823e+06	1.59328e+06	1.28425e+06	87266.3	Q9Z110	Aldh18a1		87266.3
57552.9	Q9CZS1	Aldh1b1	AL1Aldehyde dehydrogenase X, mitochondrial	AL1B1_MO	17	17	19	18	20	19	19	17	19	17	18	18	18	17	18	17	18	19	19	20	604832	468734	1.18926e+06	1.19255e+06	947635	861807	1.0179e+06	692403	908587	958135	1.05116e+06	871724	805164	683320	1.06021e+06	1.11542e+06	1.49844e+06	1532841	1.81436e+06	1.59936e+06	57552.9	Q9CZS1	Aldh1b1		57552.9
56537.5	P47738	Aldh2	Aldehyde dehydrogenase, mitochondrial	ALDH2_MOUSE	23	23	24	24	23	24	24	23	24	24	23	23	25	24	22	24	24	24	24	24	4.199e+06	3.09535e+06	9300538	9125992	6814232	6101677	7.3678e+06	5169892	6387388	6938708	7.9951e+06	6.80147e+06	6068991	4.78495e+06	7.85528e+06	7.48719e+06	10285271	11517170	14592260	11563283	56537.5	P47738	Aldh2		56537.5
53970.8	P47740	Aldh3a2	AL3Aldehyde dehydrogenase family 3 member A2	AL3A2_MO	15	15	19	18	15	15	15	17	14	16	16	15	16	15	16	14	16	16	16	16	574535	476000	1.31915e+06	1.4428e+06	956086	850673	991129	755883	812681	936347	1.15479e+06	1117862	830553	589613	1.04667e+06	980325	926333	1.18904e+06	1.32033e+06	1.21942e+06	53970.8	P47740	Aldh3a2		53970.8
52292.2	Q80VQ0	Aldh3b1	AL3Aldehyde dehydrogenase family 3 member B1	AL3B1_MO	4	0	4	5	0	3	3	0	4	3	4	3	5	6	4	5	5	6	6	6	26671.3	NaN	38668.5	67699.4	NaN	42990.6	18959.4	NaN	58413.6	33347.5	86133.3	24575.2	83746.1	59011.9	69263.1	64171.2	93404.7	91334.8	129345	112941	52292.2	Q80VQ0	Aldh3b1		52292.2
53119.9	J3QMK6	Aldh3b3	AL3Aldehyde dehydrogenase family 3 member B3	AL3B3_MO	0	1	4	4	3	3	2	3	3	3	3	3	3	2	3	3	3	3	3	3	NaN	7716.85	33671.7	27916	20763.1	21714.7	17534	16714.6	26894.4	31615.6	32860.5	29440.1	34397	18753.7	40260.6	40559.6	31028.6	36155.6	43852.4	35730.1	53119.9	J3QMK6	Aldh3b3		53119.9
61840.6	Q8CHT0	Aldh4a1	AL4Delta-1-pyrroline-5-carboxylate dehydrogenase, mitochondrial	AL4A1_MO	13	13	15	13	13	16	14	14	14	13	13	14	15	11	14	14	14	15	14	14	234038	230829	603499	523404	340968	361427	411121	311184	396246	390688	438240	460012	372317	246657	441136	433425	505432	515890	649370	486392	61840.6	Q8CHT0	Aldh4a1		61840.6
57915.6	Q9EQ20	Aldh6a1	Methylmalonate-semialdehyde/malonate-semialdehyde dehydrogenase [acylating], mitochondrial	MMSA_MOUSE	10	6	13	14	10	7	11	7	8	10	10	10	8	8	9	12	13	14	16	15	91143.8	51268.5	158148	183697	97224	88019.8	169599	70853.3	121517	145175	160804	146090	116258	80711.5	159487	197919	237550	273280	346270	284895	57915.6	Q9EQ20	Aldh6a1		57915.6
58861.49;58861.49-2	Q9DBF1;Q9DBF1-2	Aldh7a1	AL7Alpha-aminoadipic semialdehyde dehydrogenase;AL7Isoform 2 of Alpha-aminoadipic semialdehyde dehydrogenase	AL7A1_MO	6	3	6	5	7	7	7	6	8	8	7	8	9	7	8	8	5	9	7	5	42076.3	15358.8	70620	50588.2	72251.4	66263.9	84276.9	47054.1	84017.9	102131	95012.3	88768.5	118802	84550.8	121868	148918	50324	99422.3	83847.5	51259.5	58861.5	Q9DBF1	Aldh7a1		58861.5
53514.7	Q9JLJ2	Aldh9a1	AL94-trimethylaminobutyraldehyde dehydrogenase	AL9A1_MO	20	22	22	23	22	23	21	21	21	22	21	21	23	21	22	21	23	23	23	22	1.19546e+06	937200	2646613	1.89415e+06	2.10421e+06	1.90449e+06	2.42114e+06	1.87407e+06	2.14116e+06	2435362	2.58809e+06	1.84857e+06	2.12797e+06	1.55554e+06	2.62806e+06	2.35449e+06	2.64867e+06	2.5065e+06	3.31293e+06	2479060	53514.7	Q9JLJ2	Aldh9a1		53514.7
39355.9	P05064	Aldoa	Fructose-bisphosphate aldolase A	ALDOA_MOUSE	28	27	33	29	28	31	31	30	29	28	29	29	32	27	29	29	26	28	28	28	12755721	9254203	23089492	14348489	21916096	19537714	24962124	19032396	23686894	24726760	28301204	17423926	23513956	17127696	29379864	27898438	14123580	12879669	18931110	13891946	39355.9	P05064	Aldoa		39355.9
39394.9	P05063	Aldoc	Fructose-bisphosphate aldolase C	ALDOC_MOUSE	9	6	10	8	10	10	12	10	11	10	10	9	12	9	11	12	6	11	12	10	161350	108868	332960	195971	305860	253596	377951	290217	309565	348471	360470	251481	289508	203792	360605	359928	113858	267285	405200	286728	39394.9	P05063	Aldoc		39394.9
54417.4	Q921Q3	Alg1	Chitobiosyldiphosphodolichol beta-mannosyltransferase	ALG1_MOUSE	7	6	10	10	9	10	8	8	9	9	7	9	9	8	8	9	7	9	8	8	80226.1	63210.6	213923	201968	159393	153694	159893	113175	176745	186612	190552	194588	143419	112560	169878	206694	86265.5	137464	176850	160582	54417.4	Q921Q3	Alg1		54417.4
55464.9	Q3UGP8	Alg10b	Putative Dol-P-Glc:Glc(2)Man(9)GlcNAc(2)-PP-Dol alpha-1,2-glucosyltransferase	AG10B_MOUSE	4	4	5	5	4	4	5	5	5	3	4	5	6	3	4	4	2	6	5	5	108582	88576.9	180926	176325	189847	123841	169735	126733	165184	118906	152702	144297	110243	83610.9	152273	161514	76246	206911	254079	220114	55464.9	Q3UGP8	Alg10b		55464.9
55270.1	Q3TZM9	Alg11	GDP-Man:Man(3)GlcNAc(2)-PP-Dol alpha-1,2-mannosyltransferase	ALG11_MOUSE	2	5	7	8	4	5	5	2	4	4	4	5	6	6	5	4	1	6	6	6	28308.6	30395.7	140200	130352	41581.7	48837.7	75092.3	30473.6	47618.9	61923.5	69802.6	53288	59145.7	35895	64493.4	49859.8	13283.5	58398.4	63162.5	58888.9	55270.1	Q3TZM9	Alg11		55270.1
54543.4	Q8VDB2	Alg12	Dol-P-Man:Man(7)GlcNAc(2)-PP-Dol alpha-1,6-mannosyltransferase	ALG12_MOUSE	2	0	3	3	3	3	3	3	2	3	3	3	3	3	2	4	1	2	3	3	20169.8	NaN	32805.4	28332	29496.4	18765.4	31327.8	20939.2	24875.6	34784.2	35128.2	25815.8	25769.5	27088	28822.1	29842.9	12727.6	20627.3	30848.7	25748.1	54543.4	Q8VDB2	Alg12		54543.4
47404.9	Q9DBE8	Alg2	Alpha-1,3/1,6-mannosyltransferase ALG2	ALG2_MOUSE	15	14	18	18	15	16	17	15	14	16	14	16	17	14	16	14	12	16	17	15	269320	229809	576933	450880	402026	423647	465589	334548	409367	481320	541717	386796	445830	251002	538772	431429	318171	417358	562861	444371	47404.9	Q9DBE8	Alg2		47404.9
50185.5	Q8K2A8	Alg3	Dol-P-Man:Man(5)GlcNAc(2)-PP-Dol alpha-1,3-mannosyltransferase	ALG3_MOUSE	4	2	4	4	3	3	3	3	4	3	4	3	3	3	3	4	3	4	4	4	275331	47030.9	143624	89842.1	102488	76115.5	112536	97696.3	370894	125012	471625	68455.8	82123.1	66343.9	130866	444199	52861.8	325422	375834	329924	50185.5	Q8K2A8	Alg3		50185.5
36790.9	Q9DB25	Alg5	Dolichyl-phosphate beta-glucosyltransferase	ALG5_MOUSE	9	8	10	9	9	9	9	9	9	9	9	10	10	9	8	9	7	9	10	9	170585	103223	443134	368629	280010	221609	296478	214365	285581	285461	326828	236867	258162	163047	281273	318801	183641	292833	402232	303882	36790.9	Q9DB25	Alg5		36790.9
57874.1	Q3TAE8	Alg6	Dolichyl pyrophosphate Man9GlcNAc2 alpha-1,3-glucosyltransferase	ALG6_MOUSE	0	0	0	0	0	0	1	0	0	0	0	1	0	0	0	0	0	0	1	0	NaN	NaN	NaN	NaN	NaN	NaN	9581.6	NaN	NaN	NaN	NaN	9426.35	NaN	NaN	NaN	NaN	NaN	NaN	11722.9	NaN	57874.1	Q3TAE8	Alg6		57874.1
59534.7	Q6P8H8	Alg8	Probable dolichyl pyrophosphate Glc1Man9GlcNAc2 alpha-1,3-glucosyltransferase	ALG8_MOUSE	3	4	5	6	4	4	4	4	4	4	4	4	4	4	4	4	3	3	4	4	91603.6	73845.8	204123	173057	153785	129969	166415	129718	176237	178129	211487	141045	150032	106921	196561	185981	74521.3	103255	132733	125977	59534.7	Q6P8H8	Alg8		59534.7
69561	Q8VDI9	Alg9	Alpha-1,2-mannosyltransferase ALG9	ALG9_MOUSE	5	4	7	5	7	4	7	5	5	5	7	5	6	4	7	6	4	6	7	6	57306.7	41659.1	154679	95980.1	112796	87360.2	114932	74462.6	81537.3	109149	130766	72319.8	75075.5	55993.7	118403	109804	76100.6	83082.8	138515	111389	69561	Q8VDI9	Alg9		69561
43746.1	P0CB42	Alkbh1	Nucleic acid dioxygenase ALKBH1	ALKB1_MOUSE	4	3	6	3	0	4	4	1	5	4	6	4	4	1	6	4	0	0	0	1	22382.4	12197.9	43510	13188.8	NaN	29399	30677.8	3154.733154296875	47599.8	39589.4	77159.4	31704.6	21402.9	11654.4	68044.6	45005.2	NaN	NaN	NaN	5755.46	43746.1	P0CB42	Alkbh1		43746.1
27129.1	Q6P6J4	Alkbh2	DNA oxidative demethylase ALKBH2	ALKB2_MOUSE	0	0	0	3	1	1	0	0	3	1	2	3	3	3	4	1	0	0	2	0	NaN	NaN	NaN	18098.9	4981.8	6266.33	NaN	NaN	30154.5	12259.9	17354.5	28924.9	47063.8	16163	34552	15879.9	NaN	NaN	11231.2	NaN	27129.1	Q6P6J4	Alkbh2		27129.1
33061.3	Q8K1E6	Alkbh3	Alpha-ketoglutarate-dependent dioxygenase alkB homolog 3	ALKB3_MOUSE	3	5	7	7	7	7	7	8	7	7	7	6	8	5	9	10	3	4	7	7	27851.3	41450.3	152988	85470.6	144628	131469	168896	121900	155316	156641	152340	102553	143269	72583.8	183402	229898	63002.4	66862	149181	135463	33061.3	Q8K1E6	Alkbh3		33061.3
33394.4	Q9D8F1	Alkbh4	Alpha-ketoglutarate-dependent dioxygenase alkB homolog 4	ALKB4_MOUSE	0	1	2	2	2	0	2	2	3	0	0	2	2	2	2	2	1	2	2	2	NaN	5965.93	20403.6	19401.2	22968.7	NaN	26147.4	19154.2	25526.3	NaN	NaN	16368.5	20686.9	15581.7	19425.2	27139.4	17996.4	14256.3	21555	15150.4	33394.4	Q9D8F1	Alkbh4		33394.4
44411	Q3TSG4	Alkbh5	RNA demethylase ALKBH5	ALKB5_MOUSE	11	11	10	12	12	12	12	12	13	12	13	14	14	12	12	13	9	11	11	11	163406	136666	329012	265760	308319	307318	321853	181583	357696	371681	400098	340745	347108	283524	418291	379622	260398	259929	359711	277696	44411	Q3TSG4	Alkbh5		44411
26775.8	Q8K2U2	Alkbh6	Alpha-ketoglutarate-dependent dioxygenase alkB homolog 6	ALKB6_MOUSE	1	2	5	4	4	8	7	4	6	6	5	6	6	6	5	5	0	0	0	0	4272.07	16839.7	116926	66858.2	64575.7	148457	152675	60212.8	127431	147287	138253	95797.8	116165	91104	135690	133275	NaN	NaN	NaN	NaN	26775.8	Q8K2U2	Alkbh6		26775.8
24970.4	Q9D6Z0	Alkbh7	Alpha-ketoglutarate-dependent dioxygenase alkB homolog 7, mitochondrial	ALKB7_MOUSE	4	4	4	2	5	3	6	4	4	4	4	3	7	5	5	6	1	3	3	3	27106.1	20255.9	55305.3	17970.5	63082.1	30248.8	72652.3	47149.3	59987.5	79594.1	68542.2	17684.6	75164.8	40290.7	80081.9	102277	7686.46	23735.6	31188.6	22783.5	24970.4	Q9D6Z0	Alkbh7		24970.4
74767.55;74767.55-2	Q80Y20;Q80Y20-2	Alkbh8	Alkylated DNA repair protein alkB homolog 8;Isoform 2 of Alkylated DNA repair protein alkB homolog 8	ALKB8_MOUSE	3	2	0	0	5	5	5	4	6	5	5	0	8	2	5	5	0	2	2	3	18664.3	10600.8	NaN	NaN	52803.3	50099.3	60732.7	41223.3	64910.4	75526.4	66247.7	NaN	68987.7	25935	77574.7	61665.7	NaN	12929.6	10871	21316.9	74767.6	Q80Y20	Alkbh8		74767.6
75389.7	P39655	Alox12	Polyunsaturated fatty acid lipoxygenase ALOX12	LOX12_MOUSE	1	0	5	10	3	0	2	0	0	0	3	0	4	0	3	0	3	14	14	12	2983.089599609375	NaN	47252.6	101503	24159.6	NaN	21690.8	NaN	NaN	NaN	29775	NaN	25013.8	NaN	26583.3	NaN	25749.5	164720	279155	179431	75389.7	P39655	Alox12		75389.7
80472.5	Q9WV07	Aloxe3	Hydroperoxide isomerase ALOXE3	LOXE3_MOUSE	0	0	0	2	0	0	0	0	0	0	0	0	0	0	0	0	0	0	0	0	NaN	NaN	NaN	20090.4	NaN	NaN	NaN	NaN	NaN	NaN	NaN	NaN	NaN	NaN	NaN	NaN	NaN	NaN	NaN	NaN	80472.5	Q9WV07	Aloxe3		80472.5
57514.2	P09242	Alpl	Alkaline phosphatase, tissue-nonspecific isozyme	PPBT_MOUSE	16	12	17	10	15	16	17	14	16	17	17	10	16	13	17	17	1	0	2	7	242044	179289	519865	95721.9	381956	332558	494313	385065	657503	763799	872844	82635.4	559741	258682	776088	845802	6965.35	NaN	8947.22	32761.2	57514.2	P09242	Alpl		57514.2
182566	Q920R0	Als2	Alsin	ALS2_MOUSE	0	0	7	11	6	7	6	7	7	7	7	5	7	2	4	4	3	8	6	6	NaN	NaN	34061.4	73701.8	46471.2	53514.6	50365.8	40998	46247.4	67008.4	61392.5	45227.6	51845.5	17364.8	46968	29649	8363.79	49422.7	44190.3	34124.6	182566	Q920R0	Als2		182566
26940	O08583	Alyref	THO complex subunit 4	THOC4_MOUSE	8	8	11	10	10	9	10	10	11	10	10	10	10	9	10	9	8	11	10	10	3.17276e+06	2.50753e+06	5114891	4.09759e+06	4677345	3.97096e+06	4.73631e+06	3.59961e+06	5500665	5784496	6.58291e+06	4916684	4391214	3.24443e+06	5892897	5.93306e+06	4.98339e+06	5.92171e+06	7459192	6178341	26940	O08583	Alyref		26940
23730.5	Q9JJW6	Alyref2	Aly/REF export factor 2	ALRF2_MOUSE	1	1	2	2	1	2	2	0	1	1	1	2	2	1	2	1	2	2	2	2	9070.68	3956.656494140625	26884.9	26042.4	12490.7	24115.7	32004.8	NaN	18283.7	17285.3	14543.4	20991.8	24741.9	9023.53	25443.4	12969.2	19673.4	28321.4	38815	29609.9	23730.5	Q9JJW6	Alyref2		23730.5
41704	O09174	Amacr	Alpha-methylacyl-CoA racemase	AMACR_MOUSE	6	5	6	7	8	6	5	7	6	5	7	6	8	6	6	5	7	7	7	8	47083.1	41232.9	87023	123542	95499.9	53042.7	71110.4	50683.7	84809.1	60699.5	104822	78594	84924.6	54948.7	92949.7	48634.3	69557	107144	102513	125836	41704	O09174	Amacr		41704
142878.51;142878.51-2	A2AH22;A2AH22-2	Ambra1	Activating molecule in BECN1-regulated autophagy protein 1;Isoform 2 of Activating molecule in BECN1-regulated autophagy protein 1	AMRA1_MOUSE	8	6	13	4	11	11	13	11	13	13	11	6	13	7	12	13	2	5	7	4	47418.2	28658.7	134953	27723.4	109705	85091.1	134847	86988.5	151617	157501	166190	34074.3	129950	54560.3	159895	162122	9741.09	29107.8	48391.6	37640	142879	A2AH22	Ambra1		142879
38294.54;38272.49	D3Z6H8;P0DMN7	Amd2;Amd1	S-adenosylmethionine decarboxylase proenzyme 2;S-adenosylmethionine decarboxylase proenzyme 1	DCAM2_MOUSE;DCAM1_MOUSE	0	0	3	0	0	0	3	2	4	4	3	0	4	2	4	4	0	0	0	0	NaN	NaN	34652.3	NaN	NaN	NaN	32695.3	29502.9	50158	48500.4	56443.9	NaN	62011.3	24616.7	59650.3	60726.1	NaN	NaN	NaN	NaN	38294.5	D3Z6H8	Amd2		38294.5
43500.6	Q8JZV7	Amdhd2	N-acetylglucosamine-6-phosphate deacetylase	NAGA_MOUSE	4	3	5	4	5	4	4	5	5	5	5	4	4	5	4	5	6	5	6	4	39381.6	21962.5	98089.4	54191.4	89114.8	75246	97742.7	78480.8	94161.6	89423.6	102638	70304.5	70853.2	71579.8	113269	118587	110978	99532	161939	105842	43500.6	Q8JZV7	Amdhd2		43500.6
72752.8	Q9R049-2	Amfr	Isoform 2 of E3 ubiquitin-protein ligase AMFR	AMFR_MOUSE	7	7	11	6	9	9	9	9	11	9	11	0	10	8	9	10	6	8	8	7	104699	86630.4	271578	51292.4	180406	165380	220979	174823	201533	238096	272569	NaN	172230	119505	243178	252272	77935.3	102398	118809	85200.7	72752.8	Q9R049-2	Amfr		72752.8
36030.6	Q9JHT5	Ammecr1	Nuclear protein AMMECR1	AMMR1_MOUSE	4	3	5	4	5	4	6	5	6	6	6	4	7	5	6	6	2	3	2	3	42197.3	30691	110360	49813.5	90237.9	71674.6	98061.8	61711.3	117742	121677	134964	58214.4	124256	75513.1	167289	152930	19763.5	22145.6	27345.2	32101	36030.6	Q9JHT5	Ammecr1		36030.6
34516.2	Q8JZZ6	Ammecr1l	AMMECR1-like protein	AMERL_MOUSE	5	5	6	6	5	6	6	5	6	6	6	6	6	6	6	6	4	6	5	5	42351	31297.7	81386.7	42234.1	45848.1	63750.7	83846.2	40655.2	80287.6	79149.3	96774.4	50607	69694.6	44028.2	81880.2	93979.5	31052.6	47506.9	52924.6	49479.6	34516.2	Q8JZZ6	Ammecr1l		34516.2
94696	Q9DBT5	Ampd2	AMP deaminase 2	AMPD2_MOUSE	18	15	21	18	19	18	18	20	21	21	21	21	22	18	23	20	10	14	18	15	298973	190765	617364	392018	471373	406003	571167	416914	699478	804306	883912	509720	630599	440761	883192	835922	150033	207322	381901	222686	94696	Q9DBT5	Ampd2		94696
88652.3	O08739	Ampd3	AMP deaminase 3	AMPD3_MOUSE	5	0	7	7	6	7	5	5	4	6	5	5	10	6	6	5	8	8	13	14	19345.1	NaN	59551.1	46574.2	59337.3	54422	37186.5	44770.1	21248.1	30859.5	44901.5	31327.3	84906.1	32280.1	77855.9	51195.8	85475.3	75497.5	216378	171210	88652.3	O08739	Ampd3		88652.3
215994	P53995	Anapc1	Anaphase-promoting complex subunit 1	APC1_MOUSE	26	25	42	39	37	36	33	35	39	38	41	30	45	33	38	36	22	36	34	34	257912	200310	716211	368648	537252	492586	603148	498406	750580	913073	946487	349551	799702	429600	990627	895368	300449	418702	536689	482785	215994	P53995	Anapc1		215994
21266.2	Q8K2H6	Anapc10	Anaphase-promoting complex subunit 10	APC10_MOUSE	4	2	2	4	5	4	5	5	5	5	4	4	6	4	5	5	1	3	2	4	50223.4	10480.5	128251	108948	146343	114297	171120	114407	174696	197301	212600	123874	161363	118295	206799	212651	9337.61	69382.3	20970.6	89574.7	21266.2	Q8K2H6	Anapc10		21266.2
9817.55	Q9CPX9	Anapc11	Anaphase-promoting complex subunit 11	APC11_MOUSE	0	0	1	0	0	0	0	0	1	1	1	0	1	0	1	0	0	1	0	0	NaN	NaN	3893.266845703125	NaN	NaN	NaN	NaN	NaN	5030.09	2047.02	2801.281982421875	NaN	3577.49	NaN	4844.92	NaN	NaN	2401.91	NaN	NaN	9817.55	Q9CPX9	Anapc11		9817.55
95307	Q8BZQ7	Anapc2	Anaphase-promoting complex subunit 2	ANC2_MOUSE	22	19	20	19	21	22	21	23	22	24	22	19	23	19	23	24	16	22	22	22	221524	115720	450843	281823	419894	372596	480380	341511	513415	600998	653514	292723	513392	301665	668226	655379	218751	315536	420203	321182	95307	Q8BZQ7	Anapc2		95307
91707.8	Q91W96	Anapc4	Anaphase-promoting complex subunit 4	APC4_MOUSE	15	11	17	16	16	18	19	14	18	17	19	18	18	17	18	16	11	15	16	14	162515	94833.8	392147	314948	294558	318984	375977	234546	407232	464644	507782	346697	425750	277600	499724	479943	188394	211554	286163	210260	91707.8	Q91W96	Anapc4		91707.8
83097.64;83097.64-2	Q8BTZ4;Q8BTZ4-2	Anapc5	Anaphase-promoting complex subunit 5;Isoform 2 of Anaphase-promoting complex subunit 5	APC5_MOUSE	17	11	22	16	22	19	22	20	22	21	25	21	24	17	23	20	12	20	19	19	151840	89187.9	357335	176505	341388	263915	362874	253869	427525	447712	564418	225697	424582	209868	533537	463764	135736	256410	293131	245106	83097.6	Q8BTZ4	Anapc5		83097.6
63021	Q9WVM3	Anapc7	Anaphase-promoting complex subunit 7	APC7_MOUSE	15	11	18	17	16	19	15	13	17	18	20	18	18	15	19	17	8	11	14	12	119224	73466.9	315971	190698	213102	232745	224257	151620	278504	325987	361377	165154	274810	194318	345354	333922	81750	86969.2	175425	116023	63021	Q9WVM3	Anapc7		63021
62412.86;62412.86-2	Q8K1C0;Q8K1C0-2	Angel2	Protein angel homolog 2;Isoform 2 of Protein angel homolog 2	ANGE2_MOUSE	8	6	11	11	10	10	9	9	8	7	11	9	12	8	10	7	9	9	8	9	112794	76593.2	249155	229729	189853	190031	198882	151284	177877	184041	227800	197722	234118	134499	226331	172714	180658	178355	238159	190176	62412.9	Q8K1C0	Angel2		62412.9
41929.9	Q8K1C0-3	Angel2	Isoform 3 of Protein angel homolog 2	ANGE2_MOUSE	1	0	0	0	0	1	1	1	0	1	1	1	0	0	1	0	0	1	1	1	5877.22	NaN	NaN	NaN	NaN	13563.5	11424.7	11761.3	NaN	7831.92	12949.4	8523.75	NaN	NaN	15473.9	NaN	NaN	13460.5	11059.3	13311.3	41929.9	Q8K1C0-3	Angel2		41929.9
128653	Q810B6	Ankfy1	Rabankyrin-5	ANFY1_MOUSE	31	25	33	34	32	34	34	35	33	33	34	32	32	30	32	35	27	32	33	33	568400	343038	1.07187e+06	758771	1.03825e+06	960722	1.30385e+06	861260	1.18241e+06	1.19834e+06	1.53285e+06	940306	936364	817908	1.62807e+06	1385581	781761	923086	1.28866e+06	1.02117e+06	128653	Q810B6	Ankfy1		128653
269677.12;263406.96	E9PUR0;E9Q1M6	Ankhd1	E9Ankyrin repeat and KH domain containing 1;E9Q1Ankyrin repeat and KH domain containing 1	E9PUR0_MOU;E9Q1M6_M	38	31	48	45	44	43	45	42	46	48	45	44	46	37	42	45	34	34	40	35	815305	501417	1495048	1313773	1.44783e+06	1207676	1.57537e+06	1.19458e+06	1.54707e+06	1.94614e+06	1.91632e+06	1222661	1.47424e+06	972433	1.6374e+06	1.75972e+06	676293	749760	870581	685483	269677	E9PUR0	Ankhd1		269677
121876	Q6ZPS6	Ankib1	Ankyrin repeat and IBR domain-containing protein 1	AKIB1_MOUSE	4	0	4	2	11	7	9	6	10	9	9	0	9	6	7	9	1	7	4	5	20982.6	NaN	26363.8	9103.73	437823	341868	452939	48878.8	75854.9	481145	89766.4	NaN	410273	32924	90821.6	86199	3020.45	37415	40745.6	23513	121876	Q6ZPS6	Ankib1		121876
106198	Q6P1H6	Ankle2	Ankyrin repeat and LEM domain-containing protein 2	ANKL2_MOUSE	32	27	36	26	31	30	33	31	33	32	33	26	33	29	31	34	28	31	32	34	508551	352841	954082	289290	794846	554027	843015	686580	874881	945731	1.54202e+06	268962	767838	419622	1.01298e+06	1.08776e+06	506988	625434	735763	767180	106198	Q6P1H6	Ankle2		106198
48774	Q3TPE9	Ankmy2	Ankyrin repeat and MYND domain-containing protein 2	ANKY2_MOUSE	7	3	6	0	9	6	9	8	8	9	9	6	9	7	9	9	5	5	8	7	39967.1	18487.7	85676.7	NaN	151641	113062	148124	93823	173755	173908	214000	86035	225568	70526.1	247809	250886	39511.4	95260.4	96135.6	128305	48774	Q3TPE9	Ankmy2		48774
43975	Q99LW0	Ankrd10	Ankyrin repeat domain-containing protein 10	ANR10_MOUSE	4	2	4	4	5	5	5	6	8	6	7	4	6	5	7	7	0	6	6	4	28726.3	5862.63	58846.7	33225.1	52555.5	43998.8	61561.2	51943	94499.8	97653.5	107708	23421.8	73756.4	41161.5	130622	101180	NaN	53426.8	69785.7	32937.7	43975	Q99LW0	Ankrd10		43975
296186	E9Q4F7	Ankrd11	Ankyrin repeat domain-containing protein 11	ANR11_MOUSE	7	5	18	17	16	16	16	10	15	17	14	22	20	8	15	17	9	16	17	14	50025.8	18790.3	214090	139744	170666	154043	99947.6	70837.2	123864	216757	131639	239370	110749	86813.6	141737	163086	74354.9	98115.9	169946	83367.7	296186	E9Q4F7	Ankrd11		296186
67177.4	Q80UP5	Ankrd13a	Ankyrin repeat domain-containing protein 13A	AN13A_MOUSE	15	10	15	16	17	18	19	15	17	16	16	18	19	18	18	18	13	18	15	18	173178	123588	330909	240676	342060	355169	440094	291057	377384	335305	445281	325775	408103	303823	510316	499526	325208	422495	523420	470226	67177.4	Q80UP5	Ankrd13a		67177.4
60149.6	Q3UX43	Ankrd13c	Ankyrin repeat domain-containing protein 13C	AN13C_MOUSE	2	0	2	3	0	0	2	1	4	4	4	4	0	0	1	2	0	1	1	1	28341.2	NaN	13931.6	30813.8	NaN	NaN	11620.8	3164.72	38823.1	79180.6	113328	36127.7	NaN	NaN	3691.503662109375	20368.3	NaN	6004.88	6162.06	8833.93	60149.6	Q3UX43	Ankrd13c		60149.6
274213	Q99NH0	Ankrd17	Ankyrin repeat domain-containing protein 17	ANR17_MOUSE	25	18	30	28	32	31	29	26	33	33	35	27	33	26	30	30	7	19	18	18	239919	197546	602768	468560	426399	514545	520739	374386	644008	646710	795425	401040	530387	386263	701925	669354	62251	152033	197416	174881	274213	Q99NH0	Ankrd17		274213
116809.02;116809.02-2;116809.02-3	Q3UMR0;Q3UMR0-2;Q3UMR0-3	Ankrd27	Ankyrin repeat domain-containing protein 27;Isoform 2 of Ankyrin repeat domain-containing protein 27;Isoform 3 of Ankyrin repeat domain-containing protein 27	ANR27_MOUSE	2	0	5	4	3	2	3	3	5	5	7	5	5	3	6	3	2	2	3	4	12911.3	NaN	33554.9	23939.5	28563.7	23586	29928	35012	41003.4	70623.4	84640	51402.1	35632.1	35460.5	65850	45044.4	18086	21172.5	25541.5	31990.4	116809	Q3UMR0	Ankrd27		116809
112898	Q505D1	Ankrd28	Serine/threonine-protein phosphatase 6 regulatory ankyrin repeat subunit A	ANR28_MOUSE	13	7	12	12	16	13	15	12	14	16	14	11	13	11	13	12	3	8	9	3	111330	58425	166663	109645	201434	167061	212276	136530	188225	207232	217648	110917	172719	125082	244641	197132	29299.1	58882.5	102652	31359.3	112898	Q505D1	Ankrd28		112898
53203.26;53203.26-2	Q3U0L2;Q3U0L2-2	Ankrd33b	Ankyrin repeat domain-containing protein 33B;Isoform 2 of Ankyrin repeat domain-containing protein 33B	AN33B_MOUSE	0	0	4	5	3	5	5	3	4	4	5	5	4	4	3	3	0	0	0	0	NaN	NaN	30106.3	43303.5	17620.2	27410.8	33752.2	17054.8	26973	31440.7	48374.4	35842.8	19596.7	15364.2	19680.7	22380.8	NaN	NaN	NaN	NaN	53203.3	Q3U0L2	Ankrd33b		53203.3
40559.99;40559.99-2;40559.99-3	Q5SUE8;Q5SUE8-2;Q5SUE8-3	Ankrd40	Ankyrin repeat domain-containing protein 40;Isoform 2 of Ankyrin repeat domain-containing protein 40;Isoform 3 of Ankyrin repeat domain-containing protein 40	ANR40_MOUSE	0	0	0	0	0	0	0	1	3	0	0	0	0	0	3	2	1	0	1	0	NaN	NaN	NaN	NaN	NaN	NaN	NaN	2526.3	17235.1	NaN	NaN	NaN	NaN	NaN	23776.2	14164	2578.42	NaN	5493.88	NaN	40560	Q5SUE8	Ankrd40		40560
107385	B2RXR6	Ankrd44	Serine/threonine-protein phosphatase 6 regulatory ankyrin repeat subunit B	ANR44_MOUSE	28	26	33	29	32	33	34	31	31	33	32	33	33	29	34	32	30	34	34	34	452267	330542	973643	725932	1058567	864666	1.1231e+06	783092	837388	932865	1.06105e+06	866862	970445	630070	1.1905e+06	1.13992e+06	1.06563e+06	1.1339e+06	1.65286e+06	1.23377e+06	107385	B2RXR6	Ankrd44		107385
25222.7	Q8BTZ5	Ankrd46	Ankyrin repeat domain-containing protein 46	ANR46_MOUSE	0	2	3	0	0	1	2	3	3	2	3	0	3	0	3	0	0	0	0	0	NaN	10073.9	24185.4	NaN	NaN	4182.54	16646.6	21146.1	28933.9	19354.5	26493.4	NaN	17762.4	NaN	37749	NaN	NaN	NaN	NaN	NaN	25222.7	Q8BTZ5	Ankrd46		25222.7
115032	Q8BTI7	Ankrd52	Serine/threonine-protein phosphatase 6 regulatory ankyrin repeat subunit C	ANR52_MOUSE	13	5	18	12	15	15	16	14	18	18	22	12	19	16	20	19	0	0	0	2	123624	42705.6	275272	98479.8	214352	210221	242590	164144	308679	333758	407749	119672	329867	191197	376896	343517	NaN	NaN	NaN	9108.47	115032	Q8BTI7	Ankrd52		115032
32485.6	Q91WK7	Ankrd54	Ankyrin repeat domain-containing protein 54	ANR54_MOUSE	1	0	2	2	2	2	3	1	2	3	2	2	2	2	2	2	0	2	2	2	11485.7	NaN	28969.3	26375.6	28948	29777.3	51778.1	16547.4	36063.2	49590.8	37397	28658.7	26715.1	21045.5	31587.8	41440.7	NaN	32892.7	36173	34055.5	32485.6	Q91WK7	Ankrd54		32485.6
125242	P59672	Anks1a	Ankyrin repeat and SAM domain-containing protein 1A	ANS1A_MOUSE	8	5	10	11	12	12	14	10	13	15	16	14	15	8	15	13	6	8	13	11	37644.6	22490.6	102548	102748	86964	91501.4	115434	75402.8	102492	133103	158676	113576	92307	58996.1	195631	120633	30570.5	68454.6	108957	118071	125242	P59672	Anks1a		125242
82976.2	Q80UU1	Ankzf1	tRNA endonuclease ANKZF1	ANKZ1_MOUSE	10	5	9	8	10	9	11	12	12	7	10	6	11	8	9	8	8	9	11	9	67146	33200.4	145181	71413.6	128806	92015.6	145233	135009	221526	97428.7	140315	41735.6	94531	56796.6	135281	109186	87150.2	77084.7	159931	94660.9	82976.2	Q80UU1	Ankzf1		82976.2
122794	Q8K298	Anln	Anillin	ANLN_MOUSE	0	0	0	0	0	0	0	0	3	4	0	0	6	1	5	8	0	0	0	0	NaN	NaN	NaN	NaN	NaN	NaN	NaN	NaN	19247.4	30977	NaN	NaN	28935.8	1479.9678955078125	32635.3	53461	NaN	NaN	NaN	NaN	122794	Q8K298	Anln		122794
76187.79;76187.79-2;76187.79-4	Q8BH79;Q8BH79-2;Q8BH79-4	Ano10	Anoctamin-10;Isoform 2 of Anoctamin-10;Isoform 4 of Anoctamin-10	ANO10_MOUSE	7	6	9	10	9	8	9	7	7	7	9	7	8	4	7	6	6	10	9	8	60655.1	45878.4	151211	157091	114849	92916.6	130275	76740	72709.9	96009.4	124483	84601.3	86132	29703.2	118163	120814	76412.5	171165	200549	145962	76187.8	Q8BH79	Ano10		76187.8
106255	Q6P9J9	Ano6	Anoctamin-6	ANO6_MOUSE	8	5	13	16	12	8	9	11	10	14	9	13	13	7	9	12	9	10	12	11	56900.6	26128.9	187927	157781	161764	124412	136913	130479	132204	173607	172683	133191	153321	54111.2	127298	181763	85695.5	130772	212784	165368	106255	Q6P9J9	Ano6		106255
28537.5	O35381	Anp32a	Acidic leucine-rich nuclear phosphoprotein 32 family member A	AN32A_MOUSE	11	11	15	12	13	14	13	13	14	15	13	15	15	12	13	11	12	15	14	13	4243248	3284163	8835714	6.60582e+06	7.57548e+06	6.71252e+06	8546845	6290193	7.79296e+06	8534314	9288629	7.17739e+06	7981808	5989739	10038259	9539967	11517152	10056160	14040526	11122687	28537.5	O35381	Anp32a		28537.5
31078.74;31078.74-2	Q9EST5;Q9EST5-2	Anp32b	Acidic leucine-rich nuclear phosphoprotein 32 family member B;Isoform 2 of Acidic leucine-rich nuclear phosphoprotein 32 family member B	AN32B_MOUSE	6	5	6	6	6	6	6	6	6	6	6	6	6	6	6	6	6	6	6	5	3.11569e+06	2.21277e+06	5.58201e+06	4.39634e+06	4.92375e+06	4.02251e+06	5611266	3916386	5834833	5944148	6758136	4824178	4807004	3868992	6.53793e+06	6.35427e+06	4608613	5.02292e+06	6.64569e+06	5126001	31078.7	Q9EST5	Anp32b		31078.7
29622.47;29622.47-2	P97822;P97822-2	Anp32e	Acidic leucine-rich nuclear phosphoprotein 32 family member E;Isoform 2 of Acidic leucine-rich nuclear phosphoprotein 32 family member E	AN32E_MOUSE	9	6	9	8	8	9	9	8	9	9	9	9	9	9	9	9	9	9	9	9	905937	474362	1.36781e+06	1.00695e+06	1.55172e+06	1.37646e+06	1.82841e+06	1.22847e+06	1648065	1.76242e+06	2.07777e+06	1.46175e+06	1516873	1.17679e+06	2.24984e+06	2.1064e+06	1.87241e+06	1.90404e+06	2.67394e+06	2.06466e+06	29622.5	P97822	Anp32e		29622.5
24739.7	Q501J2	Antkmt	Adenine nucleotide translocase lysine N-methyltransferase	ANKMT_MOUSE	4	4	8	4	5	4	5	6	7	7	7	3	7	4	4	7	1	3	5	2	32098.3	21602.9	96992.6	45244.6	73846.5	37447	63692.8	60383.3	69967	74700.7	84549.4	19896.7	59310.1	34581.1	63529.5	91460.3	10495.1	21114.8	39439.3	21080.6	24739.7	Q501J2	Antkmt		24739.7
53184.3	Q6DFX2	Antxr2	Anthrax toxin receptor 2	ANTR2_MOUSE	0	0	0	2	1	0	0	0	1	0	2	0	0	1	0	0	3	4	2	3	NaN	NaN	NaN	8049.01	5973.49	NaN	NaN	NaN	5852.34	NaN	11637.3	NaN	NaN	4846.6	NaN	NaN	27686.8	29272.8	15082.3	25926.5	53184.3	Q6DFX2	Antxr2		53184.3
38734.3	P10107	Anxa1	Annexin A1	ANXA1_MOUSE	15	15	16	15	16	16	17	16	15	15	17	16	16	14	16	16	15	17	16	18	268697	221487	399527	301709	418064	337488	441246	327295	451859	514805	522216	370557	352406	244844	547738	503128	626711	585119	952170	649687	38734.3	P10107	Anxa1		38734.3
54079.3	P97384	Anxa11	Annexin A11	ANX11_MOUSE	15	15	17	17	15	17	16	16	16	16	15	16	17	17	15	15	15	16	16	17	892290	621142	1.98575e+06	1.56525e+06	1.58983e+06	1.44323e+06	1.83987e+06	1.27819e+06	1.44827e+06	1.6802e+06	1.77733e+06	1.52619e+06	1.59359e+06	1.20132e+06	2.00911e+06	1826723	1.79727e+06	2e+06	2.83801e+06	2.16678e+06	54079.3	P97384	Anxa11		54079.3
38676.2	P07356	Anxa2	Annexin A2	ANXA2_MOUSE	15	16	20	19	17	15	16	16	14	14	15	18	15	16	16	16	16	13	19	16	262098	404234	762989	937565	594813	342668	466706	471144	334158	336530	313171	484062	286922	456022	489134	526757	515198	437334	857566	530841	38676.2	P07356	Anxa2		38676.2
35915.7	P97429	Anxa4	Annexin A4	ANXA4_MOUSE	14	15	14	13	16	15	15	14	15	16	15	16	15	15	16	16	14	15	16	16	380584	261214	406259	244567	799236	604298	823135	542276	644576	695772	797736	613883	650134	485487	897205	866728	982919	846944	1.27457e+06	983462	35915.7	P97429	Anxa4		35915.7
35752.4	P48036	Anxa5	Annexin A5	ANXA5_MOUSE	19	17	18	18	19	18	19	19	19	19	19	19	19	19	18	19	16	19	20	18	932486	682916	1.74611e+06	1.06607e+06	1.63416e+06	1413566	1.93734e+06	1302125	1374760	1.43743e+06	1.76988e+06	1.44297e+06	1.38582e+06	1.08883e+06	1.93375e+06	1.5965e+06	2.39227e+06	2292429	3.3548e+06	2228143	35752.4	P48036	Anxa5		35752.4
75885.3	P14824	Anxa6	Annexin A6	ANXA6_MOUSE	44	44	47	46	44	47	47	45	45	44	44	47	47	46	46	44	43	50	47	46	4.97922e+06	3.3591e+06	9880031	6976115	9416142	7.67607e+06	10930807	7716446	8034673	8481417	9896409	8518766	8343819	6.10458e+06	11074829	10590385	11824569	11704310	17926786	13925665	75885.3	P14824	Anxa6		75885.3
49925.3	Q07076	Anxa7	Annexin A7	ANXA7_MOUSE	15	17	22	22	16	18	17	17	18	17	18	19	21	17	19	17	15	18	18	16	952563	709130	2.4793e+06	1.87082e+06	1.86185e+06	1.60409e+06	2.17195e+06	1.65214e+06	1.74883e+06	1.94844e+06	2.21041e+06	1.79946e+06	1.67538e+06	1.33941e+06	2.40313e+06	2.17326e+06	1.34525e+06	1597408	2.171e+06	1.62237e+06	49925.3	Q07076	Anxa7		49925.3
33775.8	E9PYF7	Ap1ar	E9AP1AR	E9PYF7_MOU	0	0	2	2	2	0	2	2	2	1	2	1	1	1	2	2	1	2	2	0	NaN	NaN	17075.3	12651.9	22254.1	NaN	21282.9	15225.4	24229.7	10334.1	28047.2	7449.61	10936.5	6731.2	25299.9	21180.1	6868.37	16773.2	18316.8	NaN	33775.8	E9PYF7	Ap1ar		33775.8
103935	O35643	Ap1b1	AP1AP-1 complex subunit beta-1	AP1B1_MO	42	41	41	40	43	41	42	42	42	41	43	42	42	41	42	41	37	43	42	42	1.96208e+06	1.35394e+06	4317791	3.26077e+06	3.66518e+06	3.14489e+06	4.08356e+06	2940477	3840501	4.1241e+06	4719871	3.34273e+06	3.84106e+06	2.75376e+06	4857290	4637311	2.86088e+06	3.32151e+06	4427430	3.4167e+06	103935	O35643	Ap1b1		103935
91350.5	P22892	Ap1g1	AP1AP-1 complex subunit gamma-1	AP1G1_MO	24	23	30	26	25	26	28	26	28	27	28	25	29	26	28	28	23	28	26	26	914811	749427	2.10084e+06	1.41457e+06	1.75878e+06	1584414	2.00071e+06	1.52393e+06	1.92342e+06	2.0406e+06	2302197	1522703	1771680	1.3547e+06	2.3172e+06	2309728	1.45795e+06	1.72811e+06	2.30983e+06	1.78667e+06	91350.5	P22892	Ap1g1		91350.5
87863.1	O88512	Ap1g2	AP1AP-1 complex subunit gamma-like 2	AP1G2_MO	16	15	23	21	19	17	18	20	20	21	18	22	23	18	19	19	15	17	19	16	263706	198309	709195	469398	548642	501868	578691	449560	595945	677942	773548	487366	643656	417666	794394	760846	453177	471057	651655	555058	87863.1	O88512	Ap1g2		87863.1
48542.8	P35585	Ap1m1	AP1AP-1 complex subunit mu-1	AP1M1_MO	20	20	22	21	21	20	21	21	21	21	21	20	21	20	20	21	18	21	21	21	971819	763310	2.02655e+06	1.46101e+06	1.96365e+06	1.8316e+06	2325407	1596969	2.14902e+06	2.3214e+06	2.67784e+06	1.82123e+06	1.91524e+06	1.44181e+06	2.71395e+06	2579019	1.63322e+06	1.88339e+06	2.53671e+06	2.08266e+06	48542.8	P35585	Ap1m1		48542.8
18733	P61967	Ap1s1	AP1AP-1 complex subunit sigma-1A	AP1S1_MO	6	6	7	6	5	6	5	6	6	7	7	6	7	6	6	6	4	7	5	6	145436	92982.3	276833	180445	214830	212999	270273	220523	333698	349687	408275	221992	260462	204045	377918	372690	207213	239311	280051	240841	18733	P61967	Ap1s1		18733
18929.1	Q9DB50	Ap1s2	AP1AP-1 complex subunit sigma-2	AP1S2_MO	3	2	3	3	2	3	2	3	3	3	2	2	4	2	3	2	3	3	3	3	35819.4	28745.8	65312.7	51436.3	60019.6	60099.7	75389.3	50294.3	70574.8	68973.7	65698.5	68634.2	46057.7	46328.6	82652.3	78440.5	82452	86490	111928	90448.3	18929.1	Q9DB50	Ap1s2		18929.1
18440.4	Q7TN05	Ap1s3	AP1AP-1 complex subunit sigma-3	AP1S3_MO	4	3	4	5	4	4	4	3	4	4	4	4	5	4	3	4	5	4	4	4	115707	43994	173902	137328	192104	208037	225362	85097.4	265949	159392	269857	155677	159473	145258	147512	298122	176735	166397	258846	264011	18440.4	Q7TN05	Ap1s3		18440.4
107664.08;107664.08-2	P17426;P17426-2	Ap2a1	AP2AP-2 complex subunit alpha-1;AP2Isoform B of AP-2 complex subunit alpha-1	AP2A1_MO	37	37	44	43	42	43	42	43	43	42	45	40	44	37	43	42	35	42	41	42	1179165	948849	2.81532e+06	2.18756e+06	2.11256e+06	1.92719e+06	2.24211e+06	1.7711e+06	2.32882e+06	2.69571e+06	3.05106e+06	1902859	2.26107e+06	1.49238e+06	2.8939e+06	2618440	1.5639e+06	1.87158e+06	2.44708e+06	2.05364e+06	107664	P17426	Ap2a1		107664
104017	P17427	Ap2a2	AP2AP-2 complex subunit alpha-2	AP2A2_MO	23	23	27	25	26	29	26	25	29	27	26	24	28	25	26	28	22	25	26	25	414377	346549	1.01483e+06	684257	773543	710934	889152	585989	919945	938682	1.07114e+06	660684	844349	582201	1.08932e+06	989463	622427	716158	982616	749299	104017	P17427	Ap2a2		104017
104582.59;104582.59-2	Q9DBG3;Q9DBG3-2	Ap2b1	AP2AP-2 complex subunit beta;AP2Isoform 2 of AP-2 complex subunit beta	AP2B1_MO	21	21	24	24	25	24	24	24	23	23	25	24	24	24	24	22	19	22	23	23	833315	646079	2.28938e+06	1.69863e+06	1.71748e+06	1.65116e+06	1.9474e+06	1.42088e+06	1.80993e+06	2.14028e+06	2408828	1.57662e+06	1854195	1.28144e+06	2.32661e+06	2.07415e+06	898496	1.15291e+06	1.53491e+06	1141233	104583	Q9DBG3	Ap2b1		104583
49654.7	P84091	Ap2m1	AP2AP-2 complex subunit mu	AP2M1_MO	21	19	22	19	21	21	22	20	21	22	22	20	21	20	23	20	17	18	21	19	985253	794683	2.43429e+06	1.73082e+06	1.77478e+06	1.43206e+06	2.04346e+06	1.33766e+06	1.97317e+06	2057840	2.51709e+06	1.51115e+06	1.61784e+06	1.4019e+06	2.26921e+06	2189028	1.02913e+06	1.29086e+06	1.82956e+06	1.38231e+06	49654.7	P84091	Ap2m1		49654.7
17017.7	P62743	Ap2s1	AP2AP-2 complex subunit sigma	AP2S1_MO	6	6	6	6	6	6	6	6	6	6	6	6	6	6	6	6	5	6	6	6	151844	125273	277845	209555	273342	243685	271267	251273	299183	310500	364530	209140	276769	218250	344153	346868	165280	225370	302219	258234	17017.7	P62743	Ap2s1		17017.7
122740	Q9Z1T1	Ap3b1	AP3AP-3 complex subunit beta-1	AP3B1_MO	28	29	38	36	32	31	31	31	29	31	30	31	34	29	30	28	26	31	32	32	559976	524686	1.29549e+06	1.02533e+06	1.09213e+06	1.02265e+06	1.17301e+06	920307	1.04657e+06	1210027	1313865	1.00475e+06	1.11227e+06	760975	1.42971e+06	1.34921e+06	848442	1.06545e+06	1.37862e+06	1.14822e+06	122740	Q9Z1T1	Ap3b1		122740
135081	O54774	Ap3d1	AP3AP-3 complex subunit delta-1	AP3D1_MO	29	28	35	36	32	31	35	36	32	34	35	33	38	29	37	35	30	35	34	35	476832	352964	1.10177e+06	940441	842310	775427	1.01362e+06	754411	867968	1.0515e+06	1.13527e+06	798492	940254	613834	1106984	1.05883e+06	662121	849528	1.16624e+06	925743	135081	O54774	Ap3d1		135081
46936.2	Q9JKC8	Ap3m1	AP3AP-3 complex subunit mu-1	AP3M1_MO	9	10	10	10	11	10	11	10	11	12	11	10	12	10	11	10	9	12	10	10	123110	129855	306818	205492	298989	282392	327013	256382	340924	371470	400706	214897	352013	209665	402876	380534	189908	250512	304731	278766	46936.2	Q9JKC8	Ap3m1		46936.2
46916.3	Q8R2R9	Ap3m2	AP3AP-3 complex subunit mu-2	AP3M2_MO	4	3	8	12	8	8	10	5	10	9	9	11	9	6	7	7	7	11	13	10	66154.6	43987	210210	177056	152222	132215	183667	114480	175220	172177	211594	183784	171833	101932	185487	183284	113412	201654	289535	220057	46916.3	Q8R2R9	Ap3m2		46916.3
21732.1	Q9DCR2	Ap3s1	AP3AP-3 complex subunit sigma-1	AP3S1_MO	3	2	4	5	4	2	5	3	6	5	5	6	5	4	7	5	3	5	6	4	22554.5	13742.4	59279.9	76563.1	51282.6	24667.5	78205.9	35671.5	71011.2	85955.8	91647.1	78597.2	63831.5	40098.2	98791.2	77298	31921.7	45802.8	75593.6	63913.1	21732.1	Q9DCR2	Ap3s1		21732.1
22017.4	Q8BSZ2	Ap3s2	AP3AP-3 complex subunit sigma-2	AP3S2_MO	0	2	4	3	5	3	4	5	4	5	4	3	4	2	5	5	4	2	4	5	NaN	13304.3	52618.1	30344.6	55848.1	43370.6	63104.4	54843.2	65681.6	87392.3	77900.1	35490.1	65437.2	23184.1	103939	122085	54373.6	40042.9	70381.2	79096	22017.4	Q8BSZ2	Ap3s2		22017.4
82976	Q9WV76	Ap4b1	AP4AP-4 complex subunit beta-1	AP4B1_MO	4	3	5	0	5	5	7	3	7	4	5	5	7	5	4	6	0	3	6	5	15644	47789.8	82086.3	NaN	37772.4	40217.5	50968.3	30296.7	157461	46809.3	163631	43385.7	46672.6	37389.1	44078.5	75310.8	NaN	88592.5	54132.5	41196	82976	Q9WV76	Ap4b1		82976
124845	Q80V94	Ap4e1	AP4AP-4 complex subunit epsilon-1	AP4E1_MO	8	0	9	9	10	11	12	11	12	12	10	9	13	10	15	11	6	9	11	9	32361	NaN	65388	49817.9	65853.2	74092.4	101254	67072.5	127796	129428	121897	70491.1	94286.6	47924.9	157280	139054	27477.4	52491	85346.8	62590.3	124845	Q80V94	Ap4e1		124845
49509.4	Q9JKC7	Ap4m1	AP4AP-4 complex subunit mu-1	AP4M1_MO	0	0	4	0	6	4	6	3	5	5	5	3	5	6	4	6	0	6	5	6	NaN	NaN	36769.9	NaN	76402.2	44690.5	72798.7	39205.5	67734.8	72972.5	81848.9	21896.5	63257.5	47629.6	61454.6	95868.5	NaN	57115.5	48454.4	50066.7	49509.4	Q9JKC7	Ap4m1		49509.4
16817.5	Q9WVL1	Ap4s1	AP4AP-4 complex subunit sigma-1	AP4S1_MO	2	0	2	1	5	2	3	3	4	4	5	1	3	3	5	4	0	2	2	3	18076.6	NaN	29427.4	10171.6	55620	18143.5	36104.8	43211.4	55327.3	61944	82258.7	11907.3	21247.7	19919.9	77046.7	65693.5	NaN	25039.9	26154.8	25507.7	16817.5	Q9WVL1	Ap4s1		16817.5
94678.7	Q3TAP4	Ap5b1	AP5AP-5 complex subunit beta-1	AP5B1_MO	4	0	9	7	8	8	8	5	3	6	9	7	10	6	8	7	5	7	9	8	28269.3	NaN	94916	50482.1	59275.7	66175.2	96078.8	43081.9	42654.9	70446.8	117643	62065.5	96123.2	48524.7	120186	98352.2	62589	65507.2	97250.4	84270.6	94678.7	Q3TAP4	Ap5b1		94678.7
54336.6	Q8BJ63	Ap5m1	AP5AP-5 complex subunit mu-1	AP5M1_MO	2	0	4	4	4	4	3	4	4	4	0	4	4	3	4	5	0	0	6	0	10196.3	NaN	28556.9	18717.7	24785.3	24704.6	25753	23655.7	35560.9	39091.2	NaN	29055.7	34827	15624.1	41345.3	44686.7	NaN	NaN	53664.4	NaN	54336.6	Q8BJ63	Ap5m1		54336.6
89406.5	Q3U829	Ap5z1	AP5AP-5 complex subunit zeta-1	AP5Z1_MO	6	5	8	8	7	7	9	8	9	9	8	9	8	8	8	8	6	9	11	8	33284.3	16694.5	86514.1	96491.9	65998.2	70488.8	77297.4	58024	88764.4	80789.2	97372.7	106736	59393.9	75562.8	103278	96697.7	56508.7	81400.2	125002	101598	89406.5	Q3U829	Ap5z1		89406.5
141003	O88879	Apaf1	Apoptotic protease-activating factor 1	APAF_MOUSE	14	10	21	18	22	22	25	19	20	20	25	28	23	20	22	23	15	23	21	22	113013	67838.4	313897	272552	296708	291011	387641	223592	246956	338562	338380	451322	301897	234481	405230	335671	259046	320861	400816	315419	141003	O88879	Apaf1		141003
74319.3	Q8R5A3	Apbb1ip	Amyloid beta A4 precursor protein-binding family B member 1-interacting protein	AB1IP_MOUSE	13	14	14	17	15	14	16	14	15	14	14	14	15	14	13	13	12	14	16	14	454999	320006	906965	651740	836267	807030	998200	687625	976446	1.06482e+06	1196826	800049	950265	758885	1.26459e+06	1.17774e+06	851670	830040	1207569	903108	74319.3	Q8R5A3	Apbb1ip		74319.3
81580.86;81580.86-2	Q8R146;Q8R146-2	Apeh	Acylamino-acid-releasing enzyme;Isoform 2 of Acylamino-acid-releasing enzyme	ACPH_MOUSE	21	18	25	17	23	22	23	24	23	22	23	21	22	22	24	22	17	24	24	22	425060	299114	963434	493893	807884	652641	968383	779984	910111	918037	1.16381e+06	669718	800093	618774	1.22802e+06	1.06782e+06	688105	893567	1.31167e+06	901737	81580.9	Q8R146	Apeh		81580.9
35490.4	P28352	Apex1	DNA-(apurinic or apyrimidinic site) endonuclease	APEX1_MOUSE	13	13	16	16	14	14	14	14	14	14	14	14	14	15	15	14	14	14	15	15	3.54372e+06	2.55811e+06	6.42733e+06	4.45068e+06	5510509	4886055	6424155	4272073	6313020	6.6608e+06	7.95993e+06	5.29523e+06	5.11239e+06	4.05673e+06	7353778	6.68903e+06	6588012	6032050	8.23004e+06	6.53001e+06	35490.4	P28352	Apex1		35490.4
57339.71;57339.71-2	Q68G58;Q68G58-2	Apex2	DNA-(apurinic or apyrimidinic site) endonuclease 2;Isoform 2 of DNA-(apurinic or apyrimidinic site) endonuclease 2	APEX2_MOUSE	0	0	2	0	3	0	3	1	3	3	3	0	0	1	3	3	0	0	0	2	NaN	NaN	28826.9	NaN	42041	NaN	48983	6996.79	65491.5	69288.2	76201	NaN	NaN	2099.63	62389.2	73465.4	NaN	NaN	NaN	17453.6	57339.7	Q68G58	Apex2		57339.7
28985.99;28985.99-2	Q8BVF7;Q8BVF7-2	Aph1a	Gamma-secretase subunit APH-1A;Isoform 2 of Gamma-secretase subunit APH-1A	APH1A_MOUSE	2	2	2	2	2	1	2	1	2	1	1	1	2	1	2	2	1	1	1	2	33631.1	38727.7	32895.1	61875.3	71444.6	25402.3	52784.1	19825.4	31110.6	27011.2	33249.4	23741.7	34988.2	19884.7	29625.2	75822.6	19459.8	16395.8	19755.2	60480	28986	Q8BVF7	Aph1a		28986
56785.2	O35841	Api5	Apoptosis inhibitor 5	API5_MOUSE	24	22	27	27	22	25	24	24	22	23	24	24	25	24	23	23	21	23	24	23	2.37472e+06	1.72862e+06	5.31581e+06	3.55384e+06	3749749	3.39847e+06	4157492	2855588	4.44028e+06	4781339	5411652	3.1719e+06	3.94118e+06	2.99064e+06	5030978	4698616	4016205	3.82765e+06	5190096	4.09636e+06	56785.2	O35841	Api5		56785.2
26949.1	Q9WVQ5	Apip	Methylthioribulose-1-phosphate dehydratase	MTNB_MOUSE	7	6	7	7	7	7	7	7	7	7	7	7	7	6	7	7	7	7	7	7	152100	100511	315427	195138	295806	250235	348180	247763	338165	352947	407252	273015	315429	210351	411574	435326	376530	385424	597603	404226	26949.1	Q9WVQ5	Apip		26949.1
54968.5	Q9D842	Aplf	Aprataxin and PNK-like factor	APLF_MOUSE	0	0	4	4	3	5	4	3	4	6	6	4	5	3	6	0	4	7	6	6	NaN	NaN	35668.6	26488.6	30308.9	33844.2	41385.6	22317.5	38943.7	66133.6	73118.8	35444.2	39516.7	26593.8	76823.5	NaN	32644.9	59321.9	65569.3	43250.2	54968.5	Q9D842	Aplf		54968.5
80467.16;80467.16-2	Q06335;Q06335-2	Aplp2	Amyloid beta precursor like protein 2;Isoform 2 of Amyloid beta precursor like protein 2	APLP2_MOUSE	2	0	2	0	0	0	0	0	0	0	0	0	1	0	0	0	0	0	0	0	8381.84	NaN	30472.3	NaN	NaN	NaN	NaN	NaN	NaN	NaN	NaN	NaN	13610.3	NaN	NaN	NaN	NaN	NaN	NaN	NaN	80467.2	Q06335	Aplp2		80467.2
46434.3	Q9D7N9	Apmap	Adipocyte plasma membrane-associated protein	APMAP_MOUSE	16	15	19	18	17	19	19	16	17	19	16	19	19	17	17	16	14	19	17	20	485390	418554	1.12247e+06	916572	798896	680735	830262	595471	775959	844562	922300	781348	689773	524352	906139	809235	727643	909771	1.07036e+06	955330	46434.3	Q9D7N9	Apmap		46434.3
30615.5	Q00623	Apoa1	Apolipoprotein A-I	APOA1_MOUSE	0	0	1	1	1	1	1	1	2	1	1	1	2	1	1	1	0	0	2	1	NaN	NaN	30226.5	42926.3	187949	136567	233380	126079	40726.5	34334.9	29167.9	38196.6	97556.8	110048	184730	182402	NaN	NaN	133910	226359	30615.5	Q00623	Apoa1		30615.5
509432	E9Q414	Apob	Apolipoprotein B-100	APOB_MOUSE	0	0	0	0	4	5	6	4	0	3	0	0	5	6	4	5	0	5	4	4	NaN	NaN	NaN	NaN	246916	274038	330169	169357	NaN	96651.9	NaN	NaN	204210	327180	205907	254258	NaN	209199	183855	164631	509432	E9Q414	Apob		509432
27521.7	P51908	Apobec1	C->U-editing enzyme APOBEC-1	ABEC1_MOUSE	1	0	0	0	0	0	0	1	0	1	0	0	0	1	0	0	0	1	2	0	7246.18	NaN	NaN	NaN	NaN	NaN	NaN	12058.6	NaN	11926.4	NaN	NaN	NaN	14419	NaN	NaN	NaN	18407.7	34842.8	NaN	27521.7	P51908	Apobec1		27521.7
52213.43;52213.43-2;52213.43-3;52213.43-4	Q99J72;Q99J72-2;Q99J72-3;Q99J72-4	Apobec3	DNA dC->dU-editing enzyme APOBEC-3;Isoform 2 of DNA dC->dU-editing enzyme APOBEC-3;Isoform 3 of DNA dC->dU-editing enzyme APOBEC-3;Isoform 4 of DNA dC->dU-editing enzyme APOBEC-3	ABEC3_MOUSE	13	12	15	13	14	15	13	15	13	14	15	12	16	13	16	15	10	12	12	12	779050	558014	1.57899e+06	708823	1.32129e+06	1.03682e+06	1.51289e+06	1.19707e+06	1.45613e+06	1.62899e+06	1.76834e+06	641497	1.44252e+06	872948	1.94092e+06	2048267	793035	851180	1.18685e+06	910044	52213.4	Q99J72	Apobec3		52213.4
35866.6	P08226	Apoe	Apolipoprotein E	APOE_MOUSE	0	0	0	0	0	0	0	0	0	0	0	0	0	0	0	0	0	2	3	2	NaN	NaN	NaN	NaN	NaN	NaN	NaN	NaN	NaN	NaN	NaN	NaN	NaN	NaN	NaN	NaN	NaN	16228.7	41224.2	30396.4	35866.6	P08226	Apoe		35866.6
22603.98;22603.98-2;22603.98-3	Q9DCZ4;Q9DCZ4-2;Q9DCZ4-3	Apoo	MICOS complex subunit Mic26;Isoform 2 of MICOS complex subunit Mic26;Isoform 3 of MICOS complex subunit Mic26	MIC26_MOUSE	4	4	4	4	4	4	4	4	4	4	4	4	4	4	4	4	3	4	4	4	139592	117673	330603	238905	203840	178722	213110	161876	247120	282191	346385	178394	203048	150517	298457	289296	136605	200074	243095	212788	22604	Q9DCZ4	Apoo		22604
29260.7	Q78IK4	Apool	MICOS complex subunit Mic27	MIC27_MOUSE	11	11	13	13	12	13	11	13	12	13	12	12	11	11	12	12	11	12	12	13	422195	340919	1.0401e+06	760701	714643	633156	707599	556213	685246	753436	870721	530412	644710	420789	780235	824981	527167	727751	915602	705648	29260.7	Q78IK4	Apool		29260.7
66855.3	Q9DAX9	Appbp2	Amyloid protein-binding protein 2	APBP2_MOUSE	7	7	12	8	11	9	11	9	13	14	14	13	12	9	13	11	0	0	0	3	47451.1	27971.6	119555	79645.5	86268	77469.8	123057	65648.4	174717	192830	212374	136414	130185	83620.5	184137	144069	NaN	NaN	NaN	12389.6	66855.3	Q9DAX9	Appbp2		66855.3
79328.1	Q8K3H0	Appl1	DCC-interacting protein 13-alpha	DP13A_MOUSE	21	16	25	23	23	23	22	21	21	24	22	24	23	22	22	22	15	21	23	21	386204	295972	830683	528223	702412	706724	855331	570018	718220	776321	953498	659650	705170	594231	921253	797979	341210	473502	694507	546042	79328.1	Q8K3H0	Appl1		79328.1
73853.7	Q8K3G9	Appl2	DCC-interacting protein 13-beta	DP13B_MOUSE	0	0	0	1	1	1	1	1	0	1	1	1	1	1	1	1	1	0	1	0	NaN	NaN	NaN	5454.02	12920.1	8360.76	5970.92	8178.09	NaN	11059.6	9768.46	7538.61	10341	11421.7	10767.4	9742.84	13186.5	NaN	12188.1	NaN	73853.7	Q8K3G9	Appl2		73853.7
19723.9	P08030	Aprt	Adenine phosphoribosyltransferase	APT_MOUSE	10	10	10	10	9	10	10	10	9	9	10	10	9	10	10	10	7	9	8	8	996768	700809	1978942	1.13255e+06	1410527	1.41105e+06	1.92331e+06	1.23541e+06	2.26405e+06	2.47948e+06	2.71281e+06	1.59526e+06	1.72313e+06	1.36798e+06	2.57128e+06	2316187	705736	685900	1.00087e+06	773831	19723.9	P08030	Aprt		19723.9
38722.82;38722.82-3	Q7TQC5;Q7TQC5-3	Aptx	Aprataxin;Isoform 3 of Aprataxin	APTX_MOUSE	3	3	5	6	4	4	5	5	5	5	5	5	5	3	4	5	4	5	6	5	57931.7	52242.7	152527	160041	117556	103936	142228	92130	139709	150058	164210	154964	108224	71938.3	153462	142743	83057.6	89804.6	125622	102880	38722.8	Q7TQC5	Aptx		38722.8
170294	Q8CFQ3	Aqr	RNA helicase aquarius	AQR_MOUSE	41	40	52	51	45	46	45	47	46	49	51	48	50	45	46	48	31	39	45	40	1.01058e+06	819105	2638965	1.9493e+06	1.70477e+06	1.57911e+06	1.82231e+06	1.34452e+06	2.10463e+06	2.37696e+06	2.77845e+06	2.02e+06	1.94869e+06	1.4184e+06	2.42195e+06	2203742	1.1062e+06	1.18678e+06	1.67385e+06	1.20191e+06	170294	Q8CFQ3	Aqr		170294
67581.5	P04627	Araf	Serine/threonine-protein kinase A-Raf	ARAF_MOUSE	10	5	10	10	10	10	11	11	11	11	10	9	10	10	10	9	10	10	10	9	155139	55931.4	259286	202946	255775	209411	324808	223026	262909	304026	326666	191360	225838	186129	342630	327291	203827	211277	347049	235003	67581.5	P04627	Araf		67581.5
162275.81;162275.81-2	Q4LDD4;Q4LDD4-2	Arap1	Arf-GAP with Rho-GAP domain, ANK repeat and PH domain-containing protein 1;Isoform 2 of Arf-GAP with Rho-GAP domain, ANK repeat and PH domain-containing protein 1	ARAP1_MOUSE	36	32	35	36	39	41	36	39	37	38	40	43	42	39	38	37	30	41	42	42	748248	615502	1.44519e+06	1294402	1.50492e+06	1.35826e+06	1.67899e+06	1.24629e+06	1.27801e+06	1379409	1.66422e+06	1394843	1414103	1.01302e+06	1.76087e+06	1.6545e+06	1.20637e+06	1.61953e+06	2.3232e+06	1.69854e+06	162276	Q4LDD4	Arap1		162276
193398	Q8BZ05	Arap2	Arf-GAP with Rho-GAP domain, ANK repeat and PH domain-containing protein 2	ARAP2_MOUSE	19	16	28	23	23	22	26	21	17	21	20	20	21	16	18	19	3	6	0	10	149708	114968	511098	255233	291570	273045	478687	338767	177811	337068	265948	223414	181234	121081	385183	359679	21288.1	39126.1	NaN	69022.6	193398	Q8BZ05	Arap2		193398
57229.4	Q5XJY5	Arcn1	Coatomer subunit delta	COPD_MOUSE	22	23	27	26	24	25	25	24	24	24	25	24	26	24	27	25	21	24	23	24	1.15356e+06	888347	2.37343e+06	1.7962e+06	2.37485e+06	2.21727e+06	2.75606e+06	2.01182e+06	2903552	3.08438e+06	3.49523e+06	2.10704e+06	2.71259e+06	1.96035e+06	3.5612e+06	3.4237e+06	1.66951e+06	1.73743e+06	2.57101e+06	1.95832e+06	57229.4	Q5XJY5	Arcn1		57229.4
94198.7	Q8CHG5	Arel1	Apoptosis-resistant E3 ubiquitin protein ligase 1	AREL1_MOUSE	4	0	8	6	5	6	6	5	8	6	6	7	5	3	5	9	0	7	6	4	11852.1	NaN	54055.8	39695.8	22592.1	26901.6	32308.3	15020.6	36024.1	36109.8	27478.9	28396.5	28897.6	7381.76	23299.8	60144.5	NaN	34853.2	44959.7	22342.9	94198.7	Q8CHG5	Arel1		94198.7
20696.8	P84078	Arf1	ADP-ribosylation factor 1	ARF1_MOUSE	9	9	11	10	10	11	9	9	8	9	10	11	10	9	9	10	8	10	9	9	4.62322e+06	3.62231e+06	9653961	7818023	8011245	6.97888e+06	8498222	6416944	8504561	8980942	9779637	7.81271e+06	7697758	5.82768e+06	9931694	9669855	6044021	7317648	9913131	8225080	20696.8	P84078	Arf1		20696.8
20745.8	Q8BSL7	Arf2	ADP-ribosylation factor 2	ARF2_MOUSE	1	1	1	1	1	1	1	1	0	1	0	1	1	1	1	1	0	1	1	1	5491.29	8705.28	17118.2	14750.2	14006.9	16934.1	16853.7	17786.8	NaN	9452.64	NaN	11457.4	11455.3	8425.48	15819.1	13772.5	NaN	11850.1	11163.2	15588	20745.8	Q8BSL7	Arf2		20745.8
20396.6	P61750	Arf4	ADP-ribosylation factor 4	ARF4_MOUSE	3	3	3	3	3	3	3	3	3	3	3	3	3	3	4	3	3	3	3	3	317828	230525	741807	624650	628420	511661	708149	472748	663636	701139	779197	616520	607217	531126	824670	797528	453037	465875	641932	509559	20396.6	P61750	Arf4		20396.6
20529.7	P84084	Arf5	ADP-ribosylation factor 5	ARF5_MOUSE	5	5	6	6	5	5	5	5	5	5	5	5	5	5	5	5	5	5	5	5	348898	288944	902185	587504	733749	608626	734465	671370	790920	793163	892793	606046	670483	512548	894302	907047	461668	610063	816014	709880	20529.7	P84084	Arf5		20529.7
20082.2	P62331	Arf6	ADP-ribosylation factor 6	ARF6_MOUSE	6	6	6	6	6	6	6	6	6	6	6	6	6	6	6	6	4	6	6	6	729645	562852	1.60178e+06	1.35954e+06	1.49438e+06	1.2559e+06	1.57337e+06	1.14661e+06	1.3898e+06	1.49039e+06	1.73455e+06	1.17086e+06	1.15655e+06	946476	1.69743e+06	1619380	826664	1.0352e+06	1377877	1.11797e+06	20082.2	P62331	Arf6		20082.2
45288.2	Q9EPJ9	Arfgap1	ADP-ribosylation factor GTPase-activating protein 1	ARFG1_MOUSE	9	8	13	13	11	11	12	12	12	11	13	12	14	10	13	11	8	10	10	11	113436	65498.3	296306	211000	229650	198331	239924	190842	266742	256199	325443	174802	232931	157767	301017	276393	126233	177137	227746	201845	45288.2	Q9EPJ9	Arfgap1		45288.2
56598.34;56598.34-2	Q99K28;Q99K28-2	Arfgap2	ADP-ribosylation factor GTPase-activating protein 2;Isoform 2 of ADP-ribosylation factor GTPase-activating protein 2	ARFG2_MOUSE	14	16	17	16	19	16	17	18	20	18	18	16	19	17	18	18	15	18	18	18	344443	265447	712233	388619	710657	538877	793558	587981	898702	955664	1.08769e+06	493694	750090	478739	1.00125e+06	1.00134e+06	401407	515871	701993	580814	56598.3	Q99K28	Arfgap2		56598.3
57455.8	Q9D8S3	Arfgap3	ADP-ribosylation factor GTPase-activating protein 3	ARFG3_MOUSE	5	5	9	6	9	7	7	6	7	10	11	7	8	6	11	11	6	10	11	8	27168.3	24060.9	85604.6	50496.4	80781	54769.9	78653.6	55948.4	71043.6	107909	125067	52419.6	79007.4	40428.2	130251	143278	47790.2	96452.3	134155	97259.9	57455.8	Q9D8S3	Arfgap3		57455.8
208500	G3X9K3	Arfgef1	Brefeldin A-inhibited guanine nucleotide-exchange protein 1	BIG1_MOUSE	47	37	52	51	55	55	56	46	52	56	57	50	56	49	55	55	31	48	53	49	542655	366646	1.40169e+06	1.02279e+06	1338442	1.16418e+06	1379088	910663	1.37508e+06	1.40619e+06	1.59843e+06	1.02689e+06	1.25954e+06	904378	1.67944e+06	1469508	517814	926892	1.3206e+06	1.11583e+06	208500	G3X9K3	Arfgef1		208500
202240	A2A5R2	Arfgef2	Brefeldin A-inhibited guanine nucleotide-exchange protein 2	BIG2_MOUSE	25	23	31	25	32	34	30	32	33	30	35	32	36	25	32	30	26	32	35	31	269329	172691	644491	411447	645662	550099	632448	522907	616372	680206	788502	560805	602724	341965	786949	650864	471475	558684	808912	565260	202240	A2A5R2	Arfgef2		202240
41518	G5E8V9	Arfip1	Arfaptin-1	ARFP1_MOUSE	10	9	11	12	10	13	11	11	12	10	10	13	13	11	12	10	9	11	13	12	207531	141978	421456	346401	363107	344308	406940	302418	487502	416034	453284	389393	522001	331970	477472	466368	352846	528012	637817	540885	41518	G5E8V9	Arfip1		41518
38416.5	G5E8V9-2	Arfip1	Isoform 2 of Arfaptin-1	ARFP1_MOUSE	0	1	1	0	0	0	0	1	0	1	0	0	0	0	0	0	0	0	0	0	NaN	5034.38	9858.86	NaN	NaN	NaN	NaN	14244.1	NaN	5452.96	NaN	NaN	NaN	NaN	NaN	NaN	NaN	NaN	NaN	NaN	38416.5	G5E8V9-2	Arfip1		38416.5
37772.6	Q8K221	Arfip2	Arfaptin-2	ARFP2_MOUSE	7	0	7	7	5	7	10	6	8	8	8	9	5	6	7	7	1	2	2	2	46182.4	NaN	89098.1	82941.1	39053.8	74210.4	104371	56655.9	102863	96097.7	126940	102146	60058.5	61482.7	113434	94638	2365.14	12840.9	11990.9	11301.4	37772.6	Q8K221	Arfip2		37772.6
22659.1	Q8BXL7	Arfrp1	ADP-ribosylation factor-related protein 1	ARFRP_MOUSE	8	9	10	10	8	10	9	9	9	9	8	10	10	9	9	8	6	8	7	9	100315	106673	242627	176598	178721	222684	205365	158658	235021	263389	252334	193953	217402	162631	242912	237630	86660.3	114188	123697	132447	22659.1	Q8BXL7	Arfrp1		22659.1
34807.9	Q61176	Arg1	Arginase-1	ARGI1_MOUSE	3	3	3	3	3	3	3	3	3	3	3	3	3	3	3	3	3	3	3	3	138818	137563	249223	360939	291958	117089	144583	150129	193911	161374	164875	176388	120748	130299	195205	178522	265151	235056	296177	216061	34807.9	Q61176	Arg1		34807.9
32887	Q3UL36	Arglu1	Arginine and glutamate-rich protein 1	ARGL1_MOUSE	3	4	4	4	4	4	4	4	4	4	4	4	3	4	4	4	4	4	4	4	337453	313417	684918	465057	551632	493853	599615	458276	720842	749470	874884	494438	500697	394070	741595	714712	625845	568387	806699	630883	32887	Q3UL36	Arglu1		32887
50410.7	Q5FWK3	Arhgap1	Rho GTPase-activating protein 1	RHG01_MOUSE	11	12	17	16	13	14	13	13	13	13	13	12	13	13	12	13	10	13	12	13	309180	267329	858055	544846	744383	678707	873208	688815	572278	642767	742464	528620	617895	462864	827359	784213	427591	574456	813244	619831	50410.7	Q5FWK3	Arhgap1		50410.7
108436	Q80Y19	Arhgap11a	Rho GTPase-activating protein 11A	RHGBA_MOUSE	0	2	0	0	4	5	6	3	8	8	8	0	8	3	8	8	0	2	2	2	NaN	15865.4	NaN	NaN	59312.6	49508.9	90254.9	53778.8	104616	133270	129403	NaN	99558.1	31403.1	136224	143450	NaN	28063.4	53048.1	33753	108436	Q80Y19	Arhgap11a		108436
95352.4	Q8C0D4	Arhgap12	Rho GTPase-activating protein 12	RHG12_MOUSE	6	5	7	7	12	11	9	9	10	11	9	10	10	6	11	10	6	10	8	9	40108.8	22896	99240.6	63642.4	121509	113858	115679	97958.6	113835	132929	106894	99123.3	116482	48413.3	154674	138479	82266.8	89395.3	91733.7	80400.7	95352.4	Q8C0D4	Arhgap12		95352.4
55339.2	Q811M1	Arhgap15	Rho GTPase-activating protein 15	RHG15_MOUSE	10	8	14	12	11	11	9	11	13	11	11	11	14	11	13	11	9	13	12	13	148508	99684.6	329833	236416	301423	254648	253508	217481	283872	291233	349624	245912	325916	225481	416699	358595	382966	459082	636655	516666	55339.2	Q811M1	Arhgap15		55339.2
92202.1	Q3UIA2	Arhgap17	Rho GTPase-activating protein 17	RHG17_MOUSE	25	25	33	30	29	32	30	28	27	27	28	29	32	26	28	30	22	29	29	31	1.10865e+06	870527	2.2301e+06	1.8062e+06	1.93903e+06	2.02979e+06	2.26654e+06	1.68248e+06	1.68508e+06	1.93512e+06	2.17397e+06	1.96222e+06	1.87589e+06	1.50823e+06	2.37533e+06	2.18153e+06	1.54504e+06	2.11833e+06	2.97428e+06	2.29092e+06	92202.1	Q3UIA2	Arhgap17		92202.1
81032.8	Q3UIA2-3	Arhgap17	Isoform 3 of Rho GTPase-activating protein 17	RHG17_MOUSE	1	1	1	1	1	1	1	1	1	1	1	1	1	1	1	1	0	1	1	1	11446.7	10148	41325.1	33799.6	26273.3	30463.5	27960.4	21902.2	26409	25539.2	21859.9	24691.6	23197.4	25069.2	33722.2	23908.2	NaN	32045.1	38918.7	30532	81032.8	Q3UIA2-3	Arhgap17		81032.8
74930.2	Q8K0Q5	Arhgap18	Rho GTPase-activating protein 18	RHG18_MOUSE	0	0	4	0	5	4	3	5	2	7	5	4	6	4	6	3	4	11	12	10	NaN	NaN	39203.4	NaN	29834.3	24192.2	17150.5	39467.9	9856.13	44859.4	40828.7	24587.9	34325.4	13579.9	77365.4	26243.1	33939.8	99662.7	160530	90526.1	74930.2	Q8K0Q5	Arhgap18		74930.2
55734.1;55734.1-2	Q8BRH3;Q8BRH3-2	Arhgap19	Rho GTPase-activating protein 19;Isoform 2 of Rho GTPase-activating protein 19	RHG19_MOUSE	0	0	0	0	0	0	3	0	5	2	0	0	4	0	5	3	0	0	0	0	NaN	NaN	NaN	NaN	NaN	NaN	29321.1	NaN	39736.8	7388.46	NaN	NaN	20934.5	NaN	57813.2	32433.3	NaN	NaN	NaN	NaN	55734.1	Q8BRH3	Arhgap19		55734.1
215874	Q6DFV3	Arhgap21	Rho GTPase-activating protein 21	RHG21_MOUSE	0	0	3	5	4	4	3	0	0	3	4	0	0	0	0	0	0	0	0	2	NaN	NaN	21321.6	27677.2	13374.7	19580.6	14350.7	NaN	NaN	14470.8	18584.7	NaN	NaN	NaN	NaN	NaN	NaN	NaN	NaN	4554.89	215874	Q6DFV3	Arhgap21		215874
84100;84100-2;84100-3	Q8C4V1;Q8C4V1-2;Q8C4V1-3	Arhgap24	Rho GTPase-activating protein 24;Isoform 2 of Rho GTPase-activating protein 24;Isoform 3 of Rho GTPase-activating protein 24	RHG24_MOUSE	0	0	8	4	7	7	6	0	7	8	9	6	8	5	7	6	0	6	6	6	NaN	NaN	94322.6	25672.3	72256.7	61205.2	79808.5	NaN	92364.8	97655	119235	54078.6	94082.9	39931.2	118127	113147	NaN	54599.1	87558.5	41860.1	84100	Q8C4V1	Arhgap24		84100
62873.6	Q8BYW1-2	Arhgap25	Isoform 2 of Rho GTPase-activating protein 25	RHG25_MOUSE	1	1	1	0	1	1	1	1	1	1	1	1	1	1	1	1	0	1	1	1	26605	21663.7	35043.4	NaN	61027.6	48813.3	77751.2	51522.4	59844	72004.6	74319.7	53598.9	45834.8	28222.7	87171.8	86486	NaN	82466.3	91745.8	94978.4	62873.6	Q8BYW1-2	Arhgap25		62873.6
73382.7	Q8BYW1	Arhgap25	Rho GTPase-activating protein 25	RHG25_MOUSE	31	27	32	31	31	32	32	30	30	31	30	32	34	29	29	31	29	32	31	32	1.18537e+06	864874	2.67039e+06	2.11023e+06	2.14029e+06	2.01407e+06	2.5034e+06	1.85872e+06	1.89761e+06	2.14613e+06	2.30856e+06	1.95513e+06	2.00632e+06	1474021	2.37792e+06	2.44078e+06	2264280	2.67765e+06	3634483	2.867e+06	73382.7	Q8BYW1	Arhgap25		73382.7
92070.6	Q6ZQ82	Arhgap26	Rho GTPase-activating protein 26	RHG26_MOUSE	8	8	13	14	14	15	12	15	13	12	12	12	16	11	12	15	12	15	14	14	108867	67316.5	288104	238440	298535	292217	317765	278309	301183	666638	365844	265037	334639	174012	343459	412949	258142	305836	403382	323196	92070.6	Q6ZQ82	Arhgap26		92070.6
75801.9	A2AB59-2	Arhgap27	Isoform 2 of Rho GTPase-activating protein 27	RHG27_MOUSE	10	10	12	11	14	13	14	13	14	15	14	15	15	14	15	14	12	14	16	14	120033	97390.5	364046	225629	366419	292631	385403	283167	354678	395227	332983	284044	365181	217647	472479	441851	369037	339947	546601	397895	75801.9	A2AB59-2	Arhgap27		75801.9
120114.41;120114.41-2	Q640N3;Q640N3-2	Arhgap30	Rho GTPase-activating protein 30;Isoform 2 of Rho GTPase-activating protein 30	RHG30_MOUSE	28	25	26	27	29	26	29	30	28	28	28	27	27	25	29	27	23	26	28	26	624499	521766	1.36107e+06	1.03187e+06	1162690	961301	1.31593e+06	964384	1.12769e+06	1.34453e+06	1.50315e+06	1.03642e+06	1086471	763431	1510909	1.43805e+06	861355	1.18766e+06	1.52245e+06	1.27882e+06	120114	Q640N3	Arhgap30		120114
104097.99;107602.93;106450.66;106509.77	B1AUX5;B1AUY3;Q80Z68;Q8VHL8	Arhgap4	B1Rho GTPase activating protein 4;B1Rho GTPase activating protein 4;Q80Rho GTPase activating protein 4;Q8Rho GTPase-activating protein p115	B1AUX5_MOU;B1AUY3_MOU;Q80Z68_MO;Q8VHL8_MOU	26	24	30	31	28	29	30	30	27	28	29	30	27	27	29	27	27	31	32	31	561219	413077	1.07687e+06	976120	1.13804e+06	992637	1.21025e+06	902528	956683	1.02018e+06	1198158	1.11042e+06	940063	737572	1.36458e+06	1.28523e+06	1354701	1.76185e+06	2.32714e+06	1.82113e+06	104098	B1AUX5	Arhgap4		104098
122902	Q3TBD2	Arhgap45	Rho GTPase-activating protein 45	HMHA1_MOUSE	33	34	38	38	35	36	35	37	35	34	35	37	37	33	35	36	36	36	39	35	1.29935e+06	1075814	2.76093e+06	1992397	2.88513e+06	2.39435e+06	3080870	2.36833e+06	2187810	2298462	2.64288e+06	2.24168e+06	2.33935e+06	1637489	2.87551e+06	2959418	2.97733e+06	3.4894e+06	4.75285e+06	3.5853e+06	122902	Q3TBD2	Arhgap45		122902
172472	P97393	Arhgap5	Rho GTPase-activating protein 5	RHG05_MOUSE	0	0	3	0	0	0	2	0	2	2	2	0	3	0	3	0	0	0	1	0	NaN	NaN	5923.79	NaN	NaN	NaN	4969.19	NaN	3684.151123046875	23254.6	8652.39	NaN	25477.3	NaN	10431	NaN	NaN	NaN	2586.118408203125	NaN	172472	P97393	Arhgap5		172472
53113.4	Q8QZW8	Arhgap9	Q8Rho GTPase activating protein 9	Q8QZW8_MOU	12	11	15	14	16	14	12	14	16	14	15	16	14	12	16	14	14	15	17	14	178342	127675	352984	366063	365913	357026	347490	259214	386680	387298	416242	398180	311170	247890	481101	423428	513147	562298	784159	536930	53113.4	Q8QZW8	Arhgap9		53113.4
23407.4	Q99PT1	Arhgdia	Rho GDP-dissociation inhibitor 1	GDIR1_MOUSE	13	11	13	13	14	14	14	14	13	14	14	14	13	13	15	13	13	13	13	13	6960128	5256286	13382391	8081664	11985932	10871928	13957270	10266892	12415149	12853280	14718096	11297534	11329762	8895136	15292993	14671212	11478838	11187375	16044676	12521405	23407.4	Q99PT1	Arhgdia		23407.4
22850.9	Q61599	Arhgdib	Rho GDP-dissociation inhibitor 2	GDIR2_MOUSE	14	15	19	19	17	17	19	17	17	17	19	18	19	16	21	17	16	18	18	19	6000282	4.81383e+06	10628810	6.68787e+06	10784343	9758226	12463487	9037736	10615169	11719768	13260462	10228526	9988926	8273104	14693403	13097130	12735671	12323037	18636388	14282427	22850.9	Q61599	Arhgdib		22850.9
102804	Q61210	Arhgef1	Rho guanine nucleotide exchange factor 1	ARHG1_MOUSE	0	0	1	1	1	1	0	1	1	1	1	1	0	0	1	0	0	1	1	1	NaN	NaN	40818.8	44061.8	44879.7	40035.1	NaN	92847.3	40799.8	72082.6	73343.7	45191.4	NaN	NaN	73576	NaN	NaN	65470.2	99102.8	97160.2	102804	Q61210	Arhgef1		102804
109249	Q61210-5	Arhgef1	Isoform 5 of Rho guanine nucleotide exchange factor 1	ARHG1_MOUSE	34	35	45	46	36	38	40	41	35	36	36	36	42	36	38	37	34	41	41	38	1.77951e+06	1.46468e+06	3.91232e+06	3.16646e+06	3.66306e+06	3.2109e+06	3.87481e+06	3094427	2.93005e+06	3.22603e+06	3649136	2.96613e+06	3.12564e+06	2.31698e+06	4.02801e+06	3.8371e+06	3.65554e+06	4.63902e+06	5.85842e+06	4.57192e+06	109249	Q61210-5	Arhgef1		109249
163508.21;163584.3	E9Q0A3;Q3U048	Arhgef11	E9Q0Rho guanine nucleotide exchange factor (GEF) 11 (Fragment);Q3Rho guanine nucleotide exchange factor 11 (Fragment)	E9Q0A3_M;Q3U048_MOU	2	0	11	9	9	7	11	0	9	10	9	7	12	5	10	10	6	15	14	14	15402.1	NaN	163988	110272	63361.3	86489.6	123198	NaN	66341.5	85060.9	95231.9	58473.6	109608	46023.2	85428.1	115293	54412.3	140448	151830	134000	163508	E9Q0A3	Arhgef11		163508
155982	Q6P9R4	Arhgef18	Rho guanine nucleotide exchange factor 18	ARHGI_MOUSE	12	9	20	22	27	24	26	24	22	19	22	23	21	17	27	23	27	34	34	33	90586.3	63202.1	276638	288964	385267	292377	325706	228757	249648	206048	263016	292970	209728	130759	422429	284343	623782	792425	1.04811e+06	823298	155982	Q6P9R4	Arhgef18		155982
111974.36;111974.36-4;111974.36-5	Q60875;Q60875-4;Q60875-5	Arhgef2	Rho guanine nucleotide exchange factor 2;Isoform 4 of Rho guanine nucleotide exchange factor 2;Isoform 5 of Rho guanine nucleotide exchange factor 2	ARHG2_MOUSE	36	36	39	37	39	40	38	37	38	40	40	40	40	38	40	41	30	38	38	39	762584	554575	1.63753e+06	1.09206e+06	1446251	1.33897e+06	1.58329e+06	1.15928e+06	1554670	1.80631e+06	1.91944e+06	1.26817e+06	1.46349e+06	1.11793e+06	1.90792e+06	1924688	960008	1.26204e+06	1.548e+06	1.19764e+06	111974	Q60875	Arhgef2		111974
87051.5	Q8K4I3	Arhgef6	Rho guanine nucleotide exchange factor 6	ARHG6_MOUSE	27	23	35	32	31	33	33	30	32	32	33	32	34	31	34	34	25	30	34	32	460929	382747	1187343	942011	1096566	1.02452e+06	1.22862e+06	909751	1.04849e+06	1194888	1.27853e+06	1.06939e+06	1.19696e+06	776313	1.48517e+06	1.40925e+06	782640	1.01936e+06	1.51505e+06	1.11634e+06	87051.5	Q8K4I3	Arhgef6		87051.5
79696.1	Q9ES28-8	Arhgef7	Isoform H of Rho guanine nucleotide exchange factor 7	ARHG7_MOUSE	19	16	23	21	21	21	21	21	21	22	22	20	22	21	24	23	17	20	21	23	388686	267322	832377	566686	718812	656074	830830	659588	797528	789856	897333	573688	746461	550956	924168	964837	546654	604956	847016	717227	79696.1	Q9ES28-8	Arhgef7		79696.1
242092	A2BH40	Arid1a	AT-rich interactive domain-containing protein 1A	ARI1A_MOUSE	44	43	57	50	48	49	50	44	49	49	51	46	53	46	52	51	47	52	52	51	939281	694842	2088394	1.36764e+06	1531861	1.30121e+06	1.61575e+06	1.21169e+06	1.62777e+06	1.84961e+06	1.96222e+06	1.20148e+06	1.55286e+06	1.16296e+06	2004745	1.89102e+06	1.76293e+06	1833052	2.29074e+06	1.69951e+06	242092	A2BH40	Arid1a		242092
242882	E9Q4N7	Arid1b	AT-rich interactive domain-containing protein 1B	ARI1B_MOUSE	33	26	34	31	35	33	32	33	37	35	33	35	38	31	37	33	31	39	36	30	423089	333541	979847	574490	908794	723391	754749	606654	843093	1.03186e+06	1.08773e+06	681188	774126	518897	1.17675e+06	1.02687e+06	919514	1.04556e+06	1.27638e+06	848149	242882	E9Q4N7	Arid1b		242882
195988	E9Q7E2	Arid2	AT-rich interactive domain-containing protein 2	ARID2_MOUSE	18	12	23	20	19	18	19	17	18	21	20	20	24	16	19	19	16	20	19	20	165707	92079.9	410057	267237	278572	278995	302972	224283	321938	377435	395510	246425	330812	170295	373037	381512	220007	299116	368231	298810	195988	E9Q7E2	Arid2		195988
64172.7	Q62431	Arid3a	AT-rich interactive domain-containing protein 3A	ARI3A_MOUSE	7	5	9	9	9	9	9	9	10	10	10	8	10	9	9	9	8	9	8	10	94534.2	65508	213064	109360	194345	188582	222585	183221	233115	265258	311548	123830	231389	151085	291709	331623	193871	201919	253918	227380	64172.7	Q62431	Arid3a		64172.7
61015.4	Q9Z1N7	Arid3b	AT-rich interactive domain-containing protein 3B	ARI3B_MOUSE	3	5	7	7	9	7	8	5	5	7	4	4	7	5	5	5	6	5	5	5	18908.1	27875.5	93946.6	54308.9	105253	83793.2	103589	65271.5	31407.5	90054.4	60494.9	46466.5	87499	54188.6	62287.1	65511.2	54707.2	44762.7	62459.2	79290.9	61015.4	Q9Z1N7	Arid3b		61015.4
142055	F8VPQ2	Arid4a	AT-rich interactive domain-containing protein 4A	ARI4A_MOUSE	12	13	16	15	18	18	14	15	16	18	17	15	19	12	19	17	17	24	24	24	98917.2	90277.6	232571	171458	308976	212915	226346	139297	208890	288042	263061	177954	240842	144685	313447	273853	288160	432199	509291	376101	142055	F8VPQ2	Arid4a		142055
147643.01;147643.01-2	A2CG63;A2CG63-2	Arid4b	AT-rich interactive domain-containing protein 4B;Isoform 2 of AT-rich interactive domain-containing protein 4B	ARI4B_MOUSE	16	15	20	20	19	19	18	20	20	22	22	20	19	16	18	20	16	21	19	17	160332	101541	326703	273982	271734	291922	283237	255219	321301	392124	443926	294854	282390	209769	351515	410421	247053	319009	391011	288618	147643	A2CG63	Arid4b		147643
63898.49;63898.49-2;63898.49-3;63898.49-4;63898.49-5	Q3U108;Q3U108-2;Q3U108-3;Q3U108-4;Q3U108-5	Arid5a	AT-rich interactive domain-containing protein 5A;Isoform 2 of AT-rich interactive domain-containing protein 5A;Isoform 3 of AT-rich interactive domain-containing protein 5A;Isoform 4 of AT-rich interactive domain-containing protein 5A;Isoform 5 of AT-rich interactive domain-containing protein 5A	ARI5A_MOUSE	0	1	2	0	0	1	3	0	0	1	2	0	0	0	0	1	0	1	0	0	NaN	1615.34	21534.2	NaN	NaN	11486.4	19548	NaN	NaN	18177.2	20525.5	NaN	NaN	NaN	NaN	16606.8	NaN	13339.5	NaN	NaN	63898.5	Q3U108	Arid5a		63898.5
64016.7	Q9Z1K5	Arih1	E3 ubiquitin-protein ligase ARIH1	ARI1_MOUSE	11	11	16	15	17	15	16	18	15	14	16	16	16	15	16	16	10	13	14	14	241023	167673	648842	342469	583726	434627	617967	498840	581628	638006	769838	445194	570629	389835	752775	657919	273291	382331	554345	435670	64016.7	Q9Z1K5	Arih1		64016.7
57696.8	Q9Z1K6	Arih2	E3 ubiquitin-protein ligase ARIH2	ARI2_MOUSE	4	3	6	7	9	8	6	4	7	8	7	8	8	6	5	6	6	7	8	5	46108.5	34114.7	117845	75865.7	108304	114089	124573	59000.7	122461	129986	147346	90189.5	103667	50579.8	85839.8	148787	67790.9	87348.4	164565	87817.6	57696.8	Q9Z1K6	Arih2		57696.8
26445.74;26445.74-2	Q8BH50;Q8BH50-2	ARK2N	Protein ARK2N;Isoform 2 of Protein ARK2N	ARK2N_MOUSE	0	2	2	0	2	2	4	2	3	4	4	2	4	2	4	2	2	3	4	1	NaN	12307.7	17397.3	NaN	20748.5	26646.1	38288.3	21275.7	31775.4	43108.7	47951.7	15687.3	35810.5	12951.9	62944.9	43017	19638	20879.9	25552.2	21099.6	26445.7	Q8BH50	ARK2N		26445.7
20411.6	P61211	Arl1	ADP-ribosylation factor-like protein 1	ARL1_MOUSE	7	7	9	9	9	9	8	6	8	8	9	6	8	7	7	6	5	8	7	7	360590	284306	709867	483109	680461	532804	719577	474004	765658	781925	915991	422255	612798	451956	850394	915330	248736	528853	698497	572286	20411.6	P61211	Arl1		20411.6
31010.6	Q8BIX3	Arl14ep	ARL14 effector protein	AL14E_MOUSE	5	3	4	3	6	5	6	6	6	5	6	2	6	5	6	6	6	6	6	6	41192.2	30633	65186.2	30110.4	95113.6	67751.9	100415	69549.1	82406.6	98232.1	120466	18475.9	76996.9	33456.7	108854	131579	100030	118163	151570	137799	31010.6	Q8BIX3	Arl14ep		31010.6
20863.9	Q9D0J4	Arl2	ADP-ribosylation factor-like protein 2	ARL2_MOUSE	6	5	7	5	5	6	5	6	8	7	6	7	8	6	7	7	5	4	7	6	85403.5	67468	197557	130523	165369	142184	187345	127111	211978	204111	212217	157964	173483	139960	234622	219746	53435.2	86658.4	151950	114359	20863.9	Q9D0J4	Arl2		20863.9
18753.93;18753.93-2	Q9D385;Q9D385-2	Arl2bp	ADP-ribosylation factor-like protein 2-binding protein;Isoform 2 of ADP-ribosylation factor-like protein 2-binding protein	AR2BP_MOUSE	0	0	0	0	0	0	1	2	3	3	2	1	0	0	4	3	2	1	1	0	NaN	NaN	NaN	NaN	NaN	NaN	2902.68	18415.3	26774.5	19063.5	7375.87	2273.4	NaN	NaN	49833.5	39774.6	6134.64	7833.2	6393.9	NaN	18753.9	Q9D385	Arl2bp		18753.9
20486.5	Q9WUL7	Arl3	ADP-ribosylation factor-like protein 3	ARL3_MOUSE	7	6	8	8	7	9	8	8	8	9	9	7	8	8	7	7	6	7	8	5	132414	118980	292612	213536	245697	266502	343379	234720	344429	351879	382519	242942	258646	218981	373539	339599	155953	187410	307779	175558	20486.5	Q9WUL7	Arl3		20486.5
20723.9	Q80ZU0	Arl5a	ADP-ribosylation factor-like protein 5A	ARL5A_MOUSE	3	0	4	3	3	3	3	3	3	3	3	3	3	3	3	3	2	3	3	3	30699.6	NaN	71406.8	48721.1	57270.1	43196.1	53417.5	49687.7	57793.7	59354.5	68692.1	48250.1	51893.6	36627.6	69242	68918.6	38598	53249.9	70994.2	53029.9	20723.9	Q80ZU0	Arl5a		20723.9
20959.28;20959.28-2	O88848;O88848-2	Arl6	ADP-ribosylation factor-like protein 6;Isoform 2 of ADP-ribosylation factor-like protein 6	ARL6_MOUSE	1	0	1	2	0	1	1	2	2	2	2	0	3	0	2	0	0	0	0	0	2647.64	NaN	7405.74	14260.3	NaN	6844.19	5743.41	9336.13	20531.2	14940.1	25704.3	NaN	25406.8	NaN	16049.1	NaN	NaN	NaN	NaN	NaN	20959.3	O88848	Arl6		20959.3
23436.9	Q9JKW0	Arl6ip1	AR6ADP-ribosylation factor-like protein 6-interacting protein 1	AR6P1_MO	2	2	2	2	2	2	2	2	2	2	2	2	2	2	2	0	1	2	2	2	23193.1	43305.6	133610	60555.9	42566	43686.1	43036.9	81996.1	58257.5	59905.4	73934	50860.7	58238	32131.4	52723.2	NaN	14984.3	28687.2	35624	21215.1	23436.9	Q9JKW0	Arl6ip1		23436.9
25524.7	Q9JM93	Arl6ip4	AR6ADP-ribosylation factor-like protein 6-interacting protein 4	AR6P4_MO	4	4	4	4	4	4	4	4	4	4	4	4	3	3	4	4	4	4	4	4	39654.6	33017.8	94807.5	75455.5	77433.8	64550.5	83686.2	61031.8	89918	112056	110395	93340.7	70241.9	38689	113052	101421	65492.5	88256.3	131233	100767	25524.7	Q9JM93	Arl6ip4		25524.7
21557.7	Q8R5J9	Arl6ip5	PRA1 family protein 3	PRAF3_MOUSE	5	6	7	6	5	5	5	5	5	5	5	6	5	5	5	5	5	5	5	5	261616	152959	745722	628585	470480	366874	440602	346447	431183	455287	528002	409468	326423	287973	532000	547626	388373	384758	665945	596717	21557.7	Q8R5J9	Arl6ip5		21557.7
24908.6	Q8BH07	Arl6ip6	AR6ADP-ribosylation factor-like protein 6-interacting protein 6	AR6P6_MO	3	3	5	4	4	4	4	5	4	4	5	4	4	4	4	4	4	4	4	4	45030.7	43022.2	123795	103339	95963.3	87936.7	97415.6	67703	94144.8	109230	116690	75605.3	78135.9	72739.7	115799	112767	88476	103098	114543	95749	24908.6	Q8BH07	Arl6ip6		24908.6
21389.8	Q8VEH3	Arl8a	ADP-ribosylation factor-like protein 8A	ARL8A_MOUSE	10	9	11	9	10	11	11	11	10	10	11	9	10	10	9	9	9	10	10	10	485276	377596	998510	794851	798705	742915	878320	603443	727367	813510	1.02517e+06	723754	660922	542267	873428	895173	573737	867203	1.09962e+06	843667	21389.8	Q8VEH3	Arl8a		21389.8
21539	Q9CQW2	Arl8b	ADP-ribosylation factor-like protein 8B	ARL8B_MOUSE	5	5	6	6	5	5	5	5	5	5	5	5	5	5	5	3	3	4	5	4	310914	258330	908884	797196	456848	485611	530573	399103	566101	580271	745957	521965	597232	432531	653220	616055	453890	489471	581447	470054	21539	Q9CQW2	Arl8b		21539
31246.5	Q9D7A8	Armc1	Armadillo repeat-containing protein 1	ARMC1_MOUSE	8	8	8	7	7	8	8	7	7	8	8	8	8	7	7	8	5	7	7	6	151847	112313	262901	142951	230808	222342	299991	197743	304669	333319	351555	180161	260006	181148	304824	328336	133135	162554	227691	153180	31246.5	Q9D7A8	Armc1		31246.5
33310.5	Q9D0L7	Armc10	Armadillo repeat-containing protein 10	ARM10_MOUSE	8	7	10	11	8	9	9	7	8	9	8	11	11	9	8	9	5	7	8	7	313793	288411	906386	765537	533808	501478	594645	475623	535611	621320	726487	541722	498282	380275	679858	696660	417363	554094	720681	571612	33310.5	Q9D0L7	Armc10		33310.5
96727.8	Q5EBP3	Armc5	Armadillo repeat-containing protein 5	ARMC5_MOUSE	0	0	5	6	4	5	0	3	7	6	9	8	8	4	4	4	0	0	0	0	NaN	NaN	22606.6	41733.2	35148.3	38991.4	NaN	9431.91	45300.7	21142.8	76957.1	143238	40256.3	28918.4	33179.5	53319.7	NaN	NaN	NaN	NaN	96727.8	Q5EBP3	Armc5		96727.8
50683.2	Q8BNU0	Armc6	Armadillo repeat-containing protein 6	ARMC6_MOUSE	10	9	13	11	12	10	12	10	11	11	12	9	12	10	11	10	7	6	6	5	135386	117264	347629	173605	230901	175150	320503	206336	271619	277625	406807	167728	283061	153426	364706	262315	76345.6	53904.8	70935.4	63784.9	50683.2	Q8BNU0	Armc6		50683.2
75364	Q9DBR3	Armc8	Armadillo repeat-containing protein 8	ARMC8_MOUSE	21	17	22	21	21	21	22	20	21	22	21	21	22	21	22	22	20	20	21	19	309295	189687	720088	393161	564354	458233	657774	482557	612066	746267	790714	431027	605368	386867	851411	845906	391531	417894	606749	425870	75364	Q9DBR3	Armc8		75364
42619.7	Q8BHS6	Armcx3	Armadillo repeat-containing X-linked protein 3	ARMX3_MOUSE	2	0	5	4	3	2	4	3	2	5	3	2	3	0	5	3	0	0	2	0	7808.54	NaN	41360.3	19861.3	23848.4	11596.5	24996.2	11169.2	11191.8	34390.6	22901.3	8797.03	21286.9	NaN	41843.1	26953.4	NaN	NaN	8184.94	NaN	42619.7	Q8BHS6	Armcx3		42619.7
78632.3	Q6PD19	Armh3	Armadillo-like helical domain-containing protein 3	ARMD3_MOUSE	7	6	9	10	7	8	7	7	9	9	8	5	8	8	11	9	4	7	8	6	56008	31871.7	104475	97749	104661	92093.6	114482	73411.6	113012	147652	125186	61845.4	98109.5	74326.8	159300	156557	72051.4	105351	163958	88131.5	78632.3	Q6PD19	Armh3		78632.3
50548.8	A6H630	Armt1	Damage-control phosphatase ARMT1	ARMT1_MOUSE	14	10	15	15	16	15	16	14	15	15	15	16	16	18	15	15	9	17	18	16	185587	110680	389089	203500	328592	311774	403613	252652	336555	418852	473562	351451	389354	277022	506394	459459	289589	377060	620065	453459	50548.8	A6H630	Armt1		50548.8
86962.94;86962.94-2	P53762;P53762-2	Arnt	Aryl hydrocarbon receptor nuclear translocator;Isoform Short of Aryl hydrocarbon receptor nuclear translocator	ARNT_MOUSE	5	2	10	10	7	5	6	7	11	9	8	8	9	7	9	7	3	8	8	5	38952.9	8024.91	122027	96833	66649.6	54523.9	64755.4	37705.4	102266	93444.9	104884	70296	71649.1	48465.5	92200.7	75337.8	18523.3	49844.8	73904.2	61272.7	86962.9	P53762	Arnt		86962.9
41626.3	Q9R0Q6	Arpc1a	Actin-related protein 2/3 complex subunit 1A	ARC1A_MOUSE	11	12	12	11	12	11	12	11	10	12	12	12	12	12	12	12	12	12	11	11	236598	213394	577443	346570	535438	407476	572928	386629	492367	685459	793545	459999	556839	392084	787853	723719	525979	560225	643696	534090	41626.3	Q9R0Q6	Arpc1a		41626.3
41063.9	Q9WV32	Arpc1b	Actin-related protein 2/3 complex subunit 1B	ARC1B_MOUSE	19	20	22	22	20	19	20	20	19	19	19	21	20	20	20	19	19	20	19	19	4.20129e+06	3.48938e+06	9170896	6.98212e+06	7520281	6.49111e+06	8.10555e+06	6588708	7422446	7800882	8794947	7.19985e+06	7.63709e+06	5461204	8854699	8527281	6759141	7609180	10444812	8452473	41063.9	Q9WV32	Arpc1b		41063.9
34357.1	Q9CVB6	Arpc2	Actin-related protein 2/3 complex subunit 2	ARPC2_MOUSE	18	17	22	20	18	18	19	19	20	19	18	21	21	19	19	18	16	19	18	17	5.33868e+06	3939992	10845667	8618015	9196638	7.86829e+06	10468806	7.32706e+06	9509772	10379584	11574217	9047113	8602830	6.9687e+06	11667615	11222178	10308890	9939418	13419135	11128745	34357.1	Q9CVB6	Arpc2		34357.1
20524.7	Q9JM76	Arpc3	Actin-related protein 2/3 complex subunit 3	ARPC3_MOUSE	10	10	11	11	11	10	10	10	10	11	10	10	11	10	11	10	10	11	10	10	2.03798e+06	1.63127e+06	5291619	3.8548e+06	3696336	3.24097e+06	4.17905e+06	3.24578e+06	4037887	4.46673e+06	4.65302e+06	3.6744e+06	4015881	2.91391e+06	4.8836e+06	4.52629e+06	4095149	4.02467e+06	5705795	4403324	20524.7	Q9JM76	Arpc3		20524.7
19667	P59999	Arpc4	Actin-related protein 2/3 complex subunit 4	ARPC4_MOUSE	9	9	10	9	10	10	9	9	9	9	10	9	10	10	10	10	8	8	8	9	3.08098e+06	2.30854e+06	6.81831e+06	4942096	5.13521e+06	4.38814e+06	5.75271e+06	4.38137e+06	5.63557e+06	5940915	6661017	4854085	4.87814e+06	3.99856e+06	7038176	6530039	6053050	5.5968e+06	7592757	6.33684e+06	19667	P59999	Arpc4		19667
16288.4	Q9CPW4	Arpc5	Actin-related protein 2/3 complex subunit 5	ARPC5_MOUSE	11	11	11	11	11	11	11	11	11	11	11	11	12	11	11	11	11	12	12	11	1.29908e+06	1.04621e+06	2.4572e+06	1.92785e+06	2.22137e+06	2.00363e+06	2.62649e+06	1.97314e+06	2.31441e+06	2.50815e+06	2.7953e+06	2205130	2215939	1.75468e+06	2768208	2845609	2.30868e+06	2.38585e+06	3.21027e+06	2652253	16288.4	Q9CPW4	Arpc5		16288.4
16980.3	Q9D898	Arpc5l	Actin-related protein 2/3 complex subunit 5-like protein	ARP5L_MOUSE	11	11	12	10	12	12	12	12	11	12	12	12	12	11	12	12	11	11	12	11	677843	488005	1.57709e+06	1.15972e+06	1.30135e+06	1108996	1526211	1.03525e+06	1.306e+06	1555503	1.67447e+06	1.3062e+06	1.36394e+06	1.02705e+06	1.73781e+06	1.66758e+06	1.08619e+06	1.49441e+06	2.06708e+06	1576237	16980.3	Q9D898	Arpc5l		16980.3
12292.9	P56212	Arpp19	cAMP-regulated phosphoprotein 19	ARP19_MOUSE	8	7	8	7	8	8	8	7	8	8	7	8	8	8	8	8	7	8	8	7	525486	384168	864149	410415	754858	686655	924232	689244	1.12667e+06	1.12259e+06	1.19779e+06	712754	977800	796738	1.36011e+06	1183943	635404	541091	728034	565611	12292.9	P56212	Arpp19		12292.9
46215.7	Q8BWG8-2	Arrb1	Isoform 1B of Beta-arrestin-1	ARRB1_MOUSE	8	8	7	9	7	9	8	6	6	7	8	8	9	6	9	8	7	10	11	9	71395.3	55465.9	183965	148425	132654	137830	144380	90049.8	103969	117841	162850	131437	117640	87073.5	158614	136088	175572	251003	367495	219930	46215.7	Q8BWG8-2	Arrb1		46215.7
46313.98;46313.98-2	Q91YI4;Q91YI4-2	Arrb2	Beta-arrestin-2;Isoform 2 of Beta-arrestin-2	ARRB2_MOUSE	9	8	11	10	10	13	10	8	12	11	11	8	10	9	9	10	7	12	12	11	67897.5	64495.3	141434	100265	172118	159304	157140	115789	184277	168083	202341	118574	148427	111443	191838	187452	107955	152936	225346	170768	46314	Q91YI4	Arrb2		46314
46329.8	Q99KN1	Arrdc1	Arrestin domain-containing protein 1	ARRD1_MOUSE	7	6	8	6	8	8	8	8	8	8	8	6	8	8	8	8	7	7	8	8	65949.3	49500.4	140243	55096.7	148677	121473	159793	112452	126425	118873	147433	39544.4	127687	101477	155082	171726	64091.2	67724.9	117780	101150	46329.8	Q99KN1	Arrdc1		46329.8
59647.05;59647.05-2	P50429;P50429-2	Arsb	Arylsulfatase B;Isoform 2 of Arylsulfatase B	ARSB_MOUSE	1	0	0	0	0	2	3	1	0	1	0	0	2	2	1	0	1	3	0	0	532.581	NaN	NaN	NaN	NaN	7059.34	18467.7	4427.68	NaN	4995.79	NaN	NaN	10718.2	7815.23	9306.78	NaN	6808.94	10259.7	NaN	NaN	59647.1	P50429	Arsb		59647.1
32801.4	P17981	Art2a	T-cell ecto-ADP-ribosyltransferase 1	NAR2A_MOUSE	0	0	0	0	1	0	0	0	0	0	0	0	0	1	0	0	0	1	0	1	NaN	NaN	NaN	NaN	16189.2	NaN	NaN	NaN	NaN	NaN	NaN	NaN	NaN	4133.39	NaN	NaN	NaN	10394.9	NaN	11021.8	32801.4	P17981	Art2a		32801.4
30534.8	Q9D0U9	Arv1	Protein ARV1	ARV1_MOUSE	0	0	1	1	1	1	0	1	0	1	1	1	0	1	1	1	0	0	1	0	NaN	NaN	11665.6	7091.69	3865.96	2975.32	NaN	5398.23	NaN	5859.75	7075.61	4578.91	NaN	1317.889404296875	9401.63	7183.23	NaN	NaN	3581.3	NaN	30534.8	Q9D0U9	Arv1		30534.8
41793.6	Q91WU5	As3mt	Arsenite methyltransferase	AS3MT_MOUSE	14	12	14	13	15	16	15	14	14	16	14	15	17	15	15	15	11	15	17	15	217311	138698	434034	223537	395223	390958	466020	350859	432248	482242	567059	283698	505958	338092	613197	540468	377764	435528	746732	491073	41793.6	Q91WU5	As3mt		41793.6
44669.6	Q9WV54	Asah1	Acid ceramidase	ASAH1_MOUSE	6	3	8	6	6	6	6	5	8	6	7	6	7	4	5	5	4	5	7	6	75728.3	43490.3	262771	128474	115685	89037.8	117236	68528	188130	110965	133700	78411.4	100241	45170.7	111733	108597	77960.9	85926.3	118654	87878.1	44669.6	Q9WV54	Asah1		44669.6
127421.22;127421.22-3;127421.22-4	Q9QWY8;Q9QWY8-3;Q9QWY8-4	Asap1	Arf-GAP with SH3 domain, ANK repeat and PH domain-containing protein 1;Isoform 3 of Arf-GAP with SH3 domain, ANK repeat and PH domain-containing protein 1;Isoform 4 of Arf-GAP with SH3 domain, ANK repeat and PH domain-containing protein 1	ASAP1_MOUSE	13	13	17	14	19	17	22	16	18	20	21	20	20	14	20	19	16	20	21	22	96266.7	81842.2	249142	136012	257257	236737	310672	167243	224246	266449	326658	208693	198822	145666	293590	272854	208409	258686	355817	300493	127421	Q9QWY8	Asap1		127421
106805	Q7SIG6	Asap2	Arf-GAP with SH3 domain, ANK repeat and PH domain-containing protein 2	ASAP2_MOUSE	1	0	1	0	0	1	0	1	1	1	1	0	1	1	1	1	1	0	1	1	7.5887e+06	NaN	15136456	NaN	NaN	5669975	NaN	7953105	8705122	7.02643e+06	6386870	NaN	6.94956e+06	11932067	10051925	10916231	14570752	NaN	11125680	7.56848e+06	106805	Q7SIG6	Asap2		106805
35331.21;35331.21-2	Q9CQ31;Q9CQ31-2	Asb11	Ankyrin repeat and SOCS box protein 11;Isoform 2 of Ankyrin repeat and SOCS box protein 11	ASB11_MOUSE	1	1	1	0	0	1	1	1	1	1	0	1	1	0	1	1	1	1	1	1	8124.23	5779.26	4699.26	NaN	NaN	16905.1	16339.6	13442.2	19312.4	18882.8	NaN	13929.6	10905.7	NaN	28282.1	26632.1	10541.5	11486.4	16124.2	18107.8	35331.2	Q9CQ31	Asb11		35331.2
58282.7	Q9WV72	Asb3	Ankyrin repeat and SOCS box protein 3	ASB3_MOUSE	0	0	5	4	3	4	4	5	3	5	3	5	6	4	6	3	0	2	0	3	NaN	NaN	39729.5	26305.3	25721.6	27175.1	29605.4	22927.8	28093.7	35234.5	68029.2	29118.7	34278.7	25158	59605.7	22283.7	NaN	9540.1	NaN	13145.6	58282.7	Q9WV72	Asb3		58282.7
46276.1	Q91ZU1	Asb6	Ankyrin repeat and SOCS box protein 6	ASB6_MOUSE	5	5	7	6	8	6	7	6	10	8	8	5	9	8	9	9	3	3	5	4	59769.1	44118.4	105159	76484.8	121542	85587.7	132520	94362.4	139830	147253	172794	72006.6	116879	86737.8	157849	173882	42955.2	55357.6	88100.7	63843.4	46276.1	Q91ZU1	Asb6		46276.1
41279.8	Q9D8Z1	Ascc1	Activating signal cointegrator 1 complex subunit 1	ASCC1_MOUSE	8	7	8	6	8	7	7	9	7	8	9	5	9	6	9	8	3	5	7	5	70708	54661.5	123872	84700.6	126027	102771	138745	134146	137368	202336	232678	92534	132261	82150.4	220939	184346	44073.6	35432.6	86725.9	76553.6	41279.8	Q9D8Z1	Ascc1		41279.8
85652.63;85652.63-2;85652.63-3	Q91WR3;Q91WR3-2;Q91WR3-3	Ascc2	Activating signal cointegrator 1 complex subunit 2;Isoform 2 of Activating signal cointegrator 1 complex subunit 2;Isoform 3 of Activating signal cointegrator 1 complex subunit 2	ASCC2_MOUSE	9	6	8	6	9	10	13	12	11	12	13	11	12	8	14	11	2	5	3	5	124259	30653.2	152198	86350.3	149847	127591	233282	176980	221778	265889	318757	172298	190022	147508	328284	260265	45305.9	49506.9	68895.1	66031.3	85652.6	Q91WR3	Ascc2		85652.6
250557	E9PZJ8	Ascc3	Activating signal cointegrator 1 complex subunit 3	ASCC3_MOUSE	34	24	46	39	44	43	41	40	43	50	48	47	46	35	47	47	13	24	34	30	265348	157839	697180	411605	616458	497833	607098	471272	615319	771454	859113	561523	626332	356917	836429	828904	135502	181672	401693	279141	250557	E9PZJ8	Ascc3		250557
22942.6	Q9CQE6	Asf1a	Histone chaperone ASF1A	ASF1A_MOUSE	4	3	4	2	4	4	4	4	4	5	4	4	5	4	4	4	4	4	4	4	74370.9	54049.3	106449	48668.7	139924	125402	174599	116843	166154	172703	180269	88520.8	158477	101666	198574	213215	123903	110501	155138	144474	22942.6	Q9CQE6	Asf1a		22942.6
22464.3	Q9DAP7	Asf1b	Histone chaperone ASF1B	ASF1B_MOUSE	3	3	4	4	3	3	4	4	4	4	4	3	4	4	4	4	2	3	3	2	74977.6	61420.4	169775	80038.7	133360	151760	221630	154198	263941	306568	323222	91499	226108	125119	323620	351938	101079	91472.6	142763	103125	22464.3	Q9DAP7	Asf1b		22464.3
68250.1	Q91X20	Ash2l	Set1/Ash2 histone methyltransferase complex subunit ASH2	ASH2L_MOUSE	20	16	17	17	20	20	19	19	20	18	17	18	21	19	20	18	18	19	19	20	331086	232618	505670	354392	566627	440908	538818	473026	593606	575210	672445	420112	498375	327634	683462	634318	480198	605280	727333	627486	68250.1	Q91X20	Ash2l		68250.1
51739.2	Q91YI0	Asl	Argininosuccinate lyase	ARLY_MOUSE	13	11	17	12	14	14	14	13	14	15	15	13	16	14	14	16	12	14	14	14	264712	193827	650746	332166	498035	435939	584758	388089	569279	623960	705765	434222	498928	370683	716224	705815	405231	418824	582556	511511	51739.2	Q91YI0	Asl		51739.2
64282.7	Q61024	Asns	Asparagine synthetase [glutamine-hydrolyzing]	ASNS_MOUSE	11	7	13	13	12	13	14	11	12	12	11	10	13	8	11	8	0	0	3	1	175936	103854	366658	141413	328387	228092	387589	285690	278062	290137	392156	133846	181260	125872	281910	205987	NaN	NaN	31435.1	8771.09	64282.7	Q61024	Asns		64282.7
69752.8	Q8BFS9	Asnsd1	Asparagine synthetase domain-containing protein 1	ASND1_MOUSE	0	2	4	0	3	4	4	3	3	5	3	0	4	4	6	4	1	0	4	4	NaN	7019.5	35148.3	NaN	28336	30829.6	39639.2	30078.7	26929.4	59837.5	44660	NaN	50957.8	26329.1	65094.2	36712.5	10014.9	NaN	35713.7	31184.4	69752.8	Q8BFS9	Asnsd1		69752.8
83042.15;83042.15-2;83042.15-3	Q8BSY0;Q8BSY0-2;Q8BSY0-3	Asph	Aspartyl/asparaginyl beta-hydroxylase;Isoform 2 of Aspartyl/asparaginyl beta-hydroxylase;Isoform 3 of Aspartyl/asparaginyl beta-hydroxylase	ASPH_MOUSE	0	0	0	0	0	0	0	0	0	0	0	0	0	0	0	0	0	0	1	1	NaN	NaN	NaN	NaN	NaN	NaN	NaN	NaN	NaN	NaN	NaN	NaN	NaN	NaN	NaN	NaN	NaN	NaN	4236.14	923.856	83042.1	Q8BSY0	Asph		83042.1
59795.7	Q8VBT9	Aspscr1	Tether containing UBX domain for GLUT4	ASPC1_MOUSE	14	12	17	15	18	17	16	16	17	18	15	15	17	17	16	18	14	16	15	16	257387	164663	560675	437856	464080	455375	521241	374006	476886	574502	563260	460893	423206	328604	589123	574631	385977	391108	485758	433250	59795.7	Q8VBT9	Aspscr1		59795.7
33949.9	Q8C0M9	Asrgl1	Isoaspartyl peptidase/L-asparaginase	ASGL1_MOUSE	9	5	10	9	9	10	8	8	8	8	8	9	10	8	9	9	10	10	10	10	134781	65188.5	304712	198419	285470	270655	320619	217133	262969	307476	324472	271754	313301	190403	386648	364126	418263	401120	576899	418139	33949.9	Q8C0M9	Asrgl1		33949.9
46584.5	P16460	Ass1	Argininosuccinate synthase	ASSY_MOUSE	11	8	16	14	15	15	17	16	13	16	15	14	16	14	14	16	12	13	16	16	208979	143244	547522	351076	627009	536772	739655	593739	409579	521542	496488	450845	521189	361810	741868	737157	512008	457225	700616	586052	46584.5	P16460	Ass1		46584.5
147107	Q8BZ32	Asxl2	Putative Polycomb group protein ASXL2	ASXL2_MOUSE	3	1	6	3	3	4	5	3	4	5	5	3	6	2	6	4	2	4	4	2	17986.1	10782	61934.7	18174.1	26184.2	29813.3	41493.3	25063	36103.8	50958.9	50855.9	23636.6	38934.5	10042.8	51053.3	34027.3	13898.2	25439	29773.7	21173	147107	Q8BZ32	Asxl2		147107
40744	Q9D5T0	Atad1	Outer mitochondrial transmembrane helix translocase	ATAD1_MOUSE	10	12	15	15	11	11	10	11	12	12	11	11	12	12	11	11	10	11	11	10	573109	472579	1.17666e+06	1.13032e+06	865140	839485	848418	694939	1066232	1.1666e+06	1.29396e+06	1.03558e+06	899590	696387	1197669	1.14949e+06	414614	487706	611223	491518	40744	Q9D5T0	Atad1		40744
117943	Q8CDM1	Atad2	ATPase family AAA domain-containing protein 2	ATAD2_MOUSE	29	25	34	29	29	33	28	30	30	31	34	28	34	26	35	34	18	26	28	25	418365	302431	865848	581796	772340	707911	777941	604333	937788	1.0553e+06	1.33989e+06	524315	862743	497910	1.18628e+06	1.14517e+06	281870	376482	499831	384528	117943	Q8CDM1	Atad2		117943
164724	E9Q166	Atad2b	E9ATPase family, AAA domain containing 2B	E9Q166_MOU	31	25	36	35	34	33	34	32	34	36	34	36	37	31	38	35	29	38	37	36	432079	305225	948733	804736	741311	649988	753174	551826	774422	920384	974553	655551	755977	490303	1.02379e+06	936698	730176	960849	1.12076e+06	887982	164724	E9Q166	Atad2b		164724
28785	A0A1W2P7J4	Atad2b	A0A1W2P7ATPase family, AAA domain containing 2B (Fragment)	A0A1W2P7	0	0	0	0	1	0	0	0	0	1	1	0	1	0	0	1	1	0	1	1	NaN	NaN	NaN	NaN	132196	NaN	NaN	NaN	NaN	59870.8	95629.9	NaN	34384.5	NaN	NaN	113658	67120.9	NaN	91838.4	122511	28785	A0A1W2P7J4	Atad2b		28785
66742	Q925I1	Atad3	ATPase family AAA domain-containing protein 3	ATAD3_MOUSE	26	24	31	30	28	27	26	28	26	26	26	26	27	24	28	27	22	23	25	24	1.62569e+06	1.20186e+06	3.37886e+06	2.57767e+06	2.18468e+06	1.8976e+06	2.28917e+06	1.66586e+06	2777999	2.82165e+06	3.31786e+06	1.87849e+06	1.95288e+06	1454089	2.74004e+06	2.75861e+06	1.13697e+06	1.27109e+06	1.64446e+06	1.37666e+06	66742	Q925I1	Atad3		66742
203909	Q4QY64	Atad5	ATPase family AAA domain-containing protein 5	ATAD5_MOUSE	6	7	20	7	14	16	15	13	18	20	25	10	20	11	20	23	0	3	4	4	19730.1	19860.1	133434	25420	92314.6	110372	120605	65524.8	195977	215580	316835	34100.5	157665	70848.7	242710	259016	NaN	8657.07	12253	14172	203909	Q4QY64	Atad5		203909
59146.36;59146.36-3	Q9Z2A5;Q9Z2A5-3	Ate1	Arginyl-tRNA--protein transferase 1;Isoform ATE1-3 of Arginyl-tRNA--protein transferase 1	ATE1_MOUSE	11	8	9	10	11	12	11	12	11	11	10	10	12	12	12	11	9	11	11	10	110183	87351.2	157571	96594.6	227389	205590	244569	186919	193136	249903	253323	172647	224243	148933	324629	286725	122531	167542	228058	172364	59146.4	Q9Z2A5	Ate1		59146.4
59048.07;58221.22	Q9Z2A5-2;Q9Z2A5-4	Ate1	Isoform ATE1-2 of Arginyl-tRNA--protein transferase 1;Isoform ATE1-4 of Arginyl-tRNA--protein transferase 1	ATE1_MOUSE	1	0	0	0	1	1	1	1	1	1	1	1	1	1	1	1	1	1	1	1	10151	NaN	NaN	NaN	20741.4	15603.9	17992.4	14144.1	16469.8	19874.1	21510	14376.8	13973.7	21542.4	23143.2	28658.9	19466.3	16010.7	26559.1	18324	59048.1	Q9Z2A5-2	Ate1		59048.1
29237.6	P81269	Atf1	Cyclic AMP-dependent transcription factor ATF-1	ATF1_MOUSE	2	1	1	2	1	2	1	1	1	2	1	1	2	1	2	1	1	1	1	1	18510.8	10961.4	28599.2	25951	20525.2	23981.7	22325.1	22540	29202.5	35924.2	31489.6	26790.9	33307.7	19527.6	33773.6	30232.1	14564.3	13507.6	20670.6	18675.6	29237.6	P81269	Atf1		29237.6
52297.8	P16951	Atf2	Cyclic AMP-dependent transcription factor ATF-2	ATF2_MOUSE	5	2	4	5	6	7	6	6	6	8	7	5	7	5	7	6	3	7	7	6	36453.1	13932.2	71005	41266.4	68533.8	53882.9	62247.5	60609.3	79243.2	95249.1	84395.1	51991.7	67187.3	43784.7	88704.9	78995.1	41314.4	66360.5	87182.5	50830.4	52297.8	P16951	Atf2		52297.8
20721.7	Q60765	Atf3	Cyclic AMP-dependent transcription factor ATF-3	ATF3_MOUSE	0	0	0	2	0	1	0	0	0	0	0	2	0	0	0	0	0	0	0	0	NaN	NaN	NaN	40193	NaN	13613.9	NaN	NaN	NaN	NaN	NaN	36393.9	NaN	NaN	NaN	NaN	NaN	NaN	NaN	NaN	20721.7	Q60765	Atf3		20721.7
72694.4	F6VAN0	Atf6	Cyclic AMP-dependent transcription factor ATF-6 alpha	ATF6A_MOUSE	5	3	7	6	3	0	3	3	6	5	4	3	3	0	2	5	0	0	0	0	26064	10247.8	72232.1	34913.8	24990.8	NaN	16204.6	18615.8	40399.9	38627.7	34483.3	16455.4	11405.3	NaN	12896.2	31510.6	NaN	NaN	NaN	NaN	72694.4	F6VAN0	Atf6		72694.4
76007.4	O35451	Atf6b	Cyclic AMP-dependent transcription factor ATF-6 beta	ATF6B_MOUSE	5	6	8	9	5	6	5	4	6	6	6	8	7	7	7	5	0	1	2	0	39097.6	39180.3	128093	130823	50002.5	64137.6	54290.9	34262	97835.2	104064	100902	129713	62738.1	57279	84270.8	86215.3	NaN	7877.9	18209.7	NaN	76007.4	O35451	Atf6b		76007.4
44607.9	Q8R0S1	Atf7	Cyclic AMP-dependent transcription factor ATF-7	ATF7_MOUSE	5	3	7	5	5	7	6	6	7	6	7	7	6	7	7	7	4	5	6	4	42617.9	19643.1	76991.2	43385.1	52315.1	86054.5	65537	73588.7	101233	104157	135695	85100.8	85016.7	62147.1	120944	125298	39038.3	41152.9	79257.9	55229.6	44607.9	Q8R0S1	Atf7		44607.9
138593	Q7TT18	Atf7ip	Activating transcription factor 7-interacting protein 1	MCAF1_MOUSE	13	5	11	8	14	10	15	13	13	15	14	8	15	8	15	15	14	16	16	17	126545	45922.2	223272	81584.7	251213	147975	278429	214986	191723	262312	326152	79215.8	220514	104113	296679	356437	314794	315184	388432	333383	138593	Q7TT18	Atf7ip		138593
25001.7	Q9D8Z6	Atg101	Autophagy-related protein 101	ATGA1_MOUSE	0	0	2	2	1	0	1	0	0	0	0	0	1	0	0	0	0	0	0	1	NaN	NaN	15575.6	13871.6	4724.53	NaN	13441.3	NaN	NaN	NaN	NaN	NaN	2050.01	NaN	NaN	NaN	NaN	NaN	NaN	828.863	25001.7	Q9D8Z6	Atg101		25001.7
15207.4	Q9CQY1	Atg12	Ubiquitin-like protein ATG12	ATG12_MOUSE	0	1	1	1	1	1	1	1	1	1	1	1	1	1	1	1	0	1	1	1	NaN	9059.21	18248.4	10244.5	27707.1	29937.6	38892.2	19112.8	23791.8	26470.5	38580.2	28111.5	24090.6	16613.8	47370.1	37504.2	NaN	19159.4	28572.2	25033.1	15207.4	Q9CQY1	Atg12		15207.4
56440.73;56440.73-2	Q91YI1;Q91YI1-2	Atg13	Autophagy-related protein 13;Isoform 2 of Autophagy-related protein 13	ATG13_MOUSE	0	0	3	1	0	0	0	4	2	4	0	2	4	0	3	0	0	0	0	2	NaN	NaN	23561.1	4090.161865234375	NaN	NaN	NaN	24362.2	19836.6	26083.9	NaN	10202	21840.3	NaN	27119.3	NaN	NaN	NaN	NaN	11571.2	56440.7	Q91YI1	Atg13		56440.7
68171.87;68171.87-2;68171.87-3;68171.87-5	Q8C0J2;Q8C0J2-2;Q8C0J2-3;Q8C0J2-5	Atg16l1	A16Autophagy-related protein 16-1;A16Isoform 2 of Autophagy-related protein 16-1;A16Isoform 3 of Autophagy-related protein 16-1;A16Isoform 5 of Autophagy-related protein 16-1	A16L1_MO	9	9	10	10	9	11	11	9	11	11	11	10	14	9	10	12	7	8	10	8	100363	79118.5	179271	126541	156931	151985	172594	119951	193258	188365	268799	187294	171214	86079.1	213648	210439	101003	92351.4	166547	108127	68171.9	Q8C0J2	Atg16l1		68171.9
69241.19;69241.19-2	Q6KAU8;Q6KAU8-2	Atg16l2	A16Protein Atg16l2;A16Isoform 2 of Protein Atg16l2	A16L2_MO	1	0	1	0	1	2	1	1	2	2	2	0	1	1	2	2	1	2	2	2	11757.5	NaN	8698.03	NaN	18925.3	11720.8	25906.8	9546.53	37471	28362.9	32078.7	NaN	12031.3	3897.997314453125	34609.6	32891.1	11175.8	14733.5	28273.3	19892.1	69241.2	Q6KAU8	Atg16l2		69241.2
210939	Q6P4T0	Atg2a	Autophagy-related protein 2 homolog A	ATG2A_MOUSE	13	8	20	22	19	12	16	13	17	18	16	17	19	13	18	18	0	19	19	18	95746.6	55173	274203	226783	224161	136741	205797	112735	196779	199096	246605	178690	193852	131772	311093	280851	NaN	188977	236856	167264	210939	Q6P4T0	Atg2a		210939
231399	Q80XK6	Atg2b	Autophagy-related protein 2 homolog B	ATG2B_MOUSE	22	11	33	25	30	28	31	27	35	31	31	31	31	28	33	31	4	20	17	18	164777	75764.1	461524	288594	303797	279298	348671	262210	439561	444121	517142	348528	355868	232964	470172	442255	28977.7	125789	138832	155728	231399	Q80XK6	Atg2b		231399
35796.3	Q9CPX6	Atg3	Ubiquitin-like-conjugating enzyme ATG3	ATG3_MOUSE	9	8	8	9	9	10	8	10	9	10	9	10	10	9	10	10	7	9	9	9	236961	119066	421904	306432	441779	388294	464022	373489	506667	542081	593583	411919	448358	344475	703155	651726	259121	308240	460435	345974	35796.3	Q9CPX6	Atg3		35796.3
45094.8	Q8C9S8	Atg4a	Cysteine protease ATG4A	ATG4A_MOUSE	0	0	1	0	0	0	2	2	0	2	2	0	2	0	1	2	0	0	2	0	NaN	NaN	11197	NaN	NaN	NaN	17522.3	8647.42	NaN	9621.19	16262.7	NaN	10440	NaN	10985	16569.8	NaN	NaN	12845.4	NaN	45094.8	Q8C9S8	Atg4a		45094.8
44375.4	Q8BGE6	Atg4b	Cysteine protease ATG4B	ATG4B_MOUSE	10	9	11	10	11	11	11	11	10	11	11	11	11	10	12	11	6	11	11	10	104013	67509.4	230009	123793	218873	193648	247668	172677	223451	250980	294471	170731	196653	139560	323892	280259	76248	117488	209006	139873	44375.4	Q8BGE6	Atg4b		44375.4
32402.2	Q99J83	Atg5	Autophagy protein 5	ATG5_MOUSE	6	5	8	8	6	7	6	6	7	6	6	7	6	6	7	6	5	6	7	6	77015.2	55912.8	169112	121218	134970	130521	162351	114587	182424	158376	173368	157908	135712	100300	187155	188551	105838	120082	167433	139474	32402.2	Q99J83	Atg5		32402.2
77520.2	Q9D906	Atg7	Ubiquitin-like modifier-activating enzyme ATG7	ATG7_MOUSE	12	6	13	13	13	15	14	17	14	16	13	11	14	12	14	15	10	14	14	14	84575.4	46472.6	264577	143849	219977	209627	252233	213520	212622	287495	280268	173929	220314	142993	298692	322673	137559	184703	243030	178009	77520.2	Q9D906	Atg7		77520.2
64217.4	Q9CWJ9	Atic	Bifunctional purine biosynthesis protein ATIC	PUR9_MOUSE	31	31	37	35	33	34	34	34	33	36	35	35	35	33	34	35	29	33	32	32	4931138	3394840	10736367	5923536	8309047	8.04865e+06	10659429	7.33009e+06	10979568	11706685	13312837	7.93151e+06	10000834	7132903	13089264	12398350	5388937	5.02981e+06	7798044	5758426	64217.4	Q9CWJ9	Atic		64217.4
66224.1	Q6PA06	Atl2	Atlastin-2	ATLA2_MOUSE	12	12	12	13	12	12	11	12	12	13	11	11	11	12	12	12	5	8	9	9	159160	138649	356817	277109	252096	216852	288136	211537	307609	351559	392038	215230	236202	169257	355232	338902	51270	113230	151122	105469	66224.1	Q6PA06	Atl2		66224.1
60575.1	Q91YH5	Atl3	Atlastin-3	ATLA3_MOUSE	20	22	23	22	23	24	22	22	23	22	23	22	23	21	22	22	16	20	22	21	749273	584911	1.40916e+06	1.02498e+06	1.23833e+06	969301	1.24859e+06	897968	1.11025e+06	1.21768e+06	1.39452e+06	861160	1.02598e+06	689302	1.39058e+06	1.37892e+06	685678	936397	1.14534e+06	996336	60575.1	Q91YH5	Atl3		60575.1
349418	Q62388	Atm	Serine-protein kinase ATM	ATM_MOUSE	43	30	53	53	50	51	52	46	62	62	60	59	66	56	61	57	38	51	61	55	416898	270638	845458	921844	768107	690119	866720	489678	1.18165e+06	1.27884e+06	1374801	1.07547e+06	1.1637e+06	932635	1.44399e+06	1.26847e+06	715124	645566	1.03155e+06	823167	349418	Q62388	Atm		349418
7338.42	O08997	Atox1	Copper transport protein ATOX1	ATOX1_MOUSE	0	0	3	2	3	2	3	2	3	3	3	3	3	3	3	3	3	3	3	3	NaN	NaN	57064.4	34510.8	48966.2	42884.1	62265.6	22266.2	71744.7	75178.2	62672.3	53309.4	79200.5	51824.5	123258	120769	60692.2	63855.8	88683	66597.8	7338.42	O08997	Atox1		7338.42
133536	Q6DFW5	Atp11b	Phospholipid-transporting ATPase IF	AT11B_MOUSE	10	15	20	16	18	18	18	17	18	18	18	18	19	16	18	17	13	15	17	14	103547	88734.1	302678	208624	225071	203922	285158	203834	238477	220296	324039	229448	259924	157977	307069	259142	141619	159399	271571	196517	133536	Q6DFW5	Atp11b		133536
127511	Q9QZW0-2	Atp11c	Isoform 2 of Phospholipid-transporting ATPase 11C	AT11C_MOUSE	15	11	18	18	16	17	12	14	17	16	18	13	17	14	17	14	10	15	18	18	126386	74853.1	273849	492195	204275	167904	158913	140523	279698	215166	287686	126957	295757	140536	255282	215271	114526	169452	247349	212601	127511	Q9QZW0-2	Atp11c		127511
132388	Q9EPE9	Atp13a1	Endoplasmic reticulum transmembrane helix translocase	AT131_MOUSE	30	30	38	37	35	36	35	34	35	38	37	37	36	32	36	36	26	36	36	34	617259	549788	1.68523e+06	1370111	1.10861e+06	1.02831e+06	1112760	888859	1.14495e+06	1.35407e+06	1.51791e+06	1.03701e+06	977961	694975	1404924	1.37879e+06	802066	1.13009e+06	1.48867e+06	1.13517e+06	132388	Q9EPE9	Atp13a1		132388
126443	Q9CTG6	Atp13a2	Polyamine-transporting ATPase 13A2	AT132_MOUSE	0	0	2	0	0	0	0	0	0	0	0	0	0	0	0	0	1	0	3	4	NaN	NaN	8987.24	NaN	NaN	NaN	NaN	NaN	NaN	NaN	NaN	NaN	NaN	NaN	NaN	NaN	5457.2	NaN	22546.6	21974.4	126443	Q9CTG6	Atp13a2		126443
137469.23;137469.23-2	Q5XF89;Q5XF89-2	Atp13a3	Polyamine-transporting ATPase 13A3;Isoform 2 of Polyamine-transporting ATPase 13A3	AT133_MOUSE	5	6	7	10	8	9	6	6	9	9	10	9	8	3	12	11	0	0	3	1	28971.4	34579.5	99310.5	82292.6	46544	74813.9	31786.7	38680.7	119365	102722	113555	76468	64839	19275	130754	110682	NaN	NaN	23569	4660.92	137469	Q5XF89	Atp13a3		137469
112982	Q8VDN2	Atp1a1	AT1Sodium/potassium-transporting ATPase subunit alpha-1	AT1A1_MO	42	41	44	41	42	41	39	44	42	41	42	41	41	38	42	41	32	36	38	37	3.64467e+06	2847195	7.77707e+06	5.55482e+06	5.40355e+06	4.88722e+06	5634736	4414266	5957362	6.35179e+06	7319820	4440387	4.80804e+06	3.70792e+06	6.448e+06	6.34218e+06	1984864	2.34132e+06	2.89559e+06	2.44866e+06	112982	Q8VDN2	Atp1a1		112982
35194.6	P14094	Atp1b1	AT1Sodium/potassium-transporting ATPase subunit beta-1	AT1B1_MO	2	2	5	6	6	5	6	5	2	5	3	3	4	4	6	2	3	6	6	5	13069.5	10118.5	52978.5	75056	84310.1	67541.9	122658	36055.1	17620.5	46704.9	72112.1	35417.5	42266.7	24831.4	68395.9	28117.6	47714.4	87522.2	85199.7	61915.7	35194.6	P14094	Atp1b1		35194.6
31775.7	P97370	Atp1b3	AT1Sodium/potassium-transporting ATPase subunit beta-3	AT1B3_MO	12	11	14	13	12	12	11	12	12	13	12	13	13	11	12	13	7	11	11	11	903452	772280	2.00893e+06	1.39498e+06	1.36361e+06	1.27289e+06	1291630	1.026e+06	1.52783e+06	1.73668e+06	1.91773e+06	1.16128e+06	1.34757e+06	892200	1.62196e+06	1.63828e+06	417849	482181	615814	537147	31775.7	P97370	Atp1b3		31775.7
114858	O55143	Atp2a2	AT2Sarcoplasmic/endoplasmic reticulum calcium ATPase 2	AT2A2_MO	32	34	44	45	34	36	35	33	35	34	34	37	36	34	34	33	30	30	31	33	2.65354e+06	2.19961e+06	5196053	4.27538e+06	3.9066e+06	3.44169e+06	4.13873e+06	3267636	4.72845e+06	5.01866e+06	5869035	3.73094e+06	3.40937e+06	2.39607e+06	4.94704e+06	5.02552e+06	1.83777e+06	2.19809e+06	2.69617e+06	2.43338e+06	114858	O55143	Atp2a2		114858
113638	Q64518-1	Atp2a3	AT2Isoform SERCA3B of Sarcoplasmic/endoplasmic reticulum calcium ATPase 3	AT2A3_MO	38	39	46	47	43	44	42	41	41	40	45	44	47	40	41	42	41	47	47	44	4.01648e+06	3.32346e+06	8549307	8.11377e+06	6.85616e+06	6.18675e+06	7.02947e+06	5.42803e+06	6290391	6684686	7899975	6.50684e+06	5.78543e+06	4396839	7.6705e+06	7689777	8545180	10680248	13349290	10914385	113638	Q64518-1	Atp2a3		113638
134747	G5E829	Atp2b1	AT2Plasma membrane calcium-transporting ATPase 1	AT2B1_MO	24	20	27	23	25	21	23	20	26	25	24	23	24	24	26	27	17	24	25	22	356150	286965	778683	466500	598200	485122	611257	388660	635217	651957	816879	479034	500956	394549	780119	756598	282198	409243	506442	381535	134747	G5E829	Atp2b1		134747
100299	Q80XR2	Atp2c1	AT2Calcium-transporting ATPase type 2C member 1	AT2C1_MO	7	7	13	14	10	13	13	11	15	13	16	16	12	12	14	12	9	14	14	15	46272.8	41224.2	193016	146235	122778	108873	155894	110390	187699	178612	283251	190129	121612	81068.4	216892	181613	94727.5	173115	178097	201281	100299	Q80XR2	Atp2c1		100299
59752.6	Q03265	Atp5f1a	ATP synthase subunit alpha, mitochondrial	ATPA_MOUSE	32	29	37	37	34	37	33	34	33	35	37	35	35	32	33	34	28	38	35	36	20618668	16543844	43827800	31856426	30236176	26397318	31804526	24708262	34717224	37057176	43467448	24564752	29426262	21023256	38602928	39333676	26473456	30431494	38092456	30640702	59752.6	Q03265	Atp5f1a		59752.6
56300.5	P56480	Atp5f1b	ATP synthase subunit beta, mitochondrial	ATPB_MOUSE	27	27	29	28	28	29	28	28	27	29	29	29	30	27	29	28	22	28	27	28	19790688	15955478	38564536	28974008	28933122	25767212	31154928	23377940	31589728	34731112	41783276	24434650	28743446	20839280	37536408	37793292	20347708	27385696	35066336	27310438	56300.5	P56480	Atp5f1b		56300.5
32885.9	Q91VR2	Atp5f1c	ATP synthase subunit gamma, mitochondrial	ATPG_MOUSE	11	11	12	12	11	12	11	11	11	11	12	11	12	11	12	11	10	12	12	12	2987126	2.45081e+06	5.95768e+06	4.43097e+06	4241645	3.75361e+06	4.40567e+06	3.46203e+06	4.73851e+06	5006933	5621857	3.42313e+06	4.31486e+06	3.07613e+06	5.18856e+06	5.1689e+06	3.7516e+06	4231032	5263332	4.29901e+06	32885.9	Q91VR2	Atp5f1c		32885.9
17600	Q9D3D9	Atp5f1d	ATP synthase subunit delta, mitochondrial	ATPD_MOUSE	4	4	4	3	4	4	4	4	4	4	4	4	3	4	4	4	3	3	3	4	186880	184540	434792	248475	383756	354306	446616	521764	584050	596073	668726	274807	502554	322318	875497	1.05345e+06	266765	338245	447830	360116	17600	Q9D3D9	Atp5f1d		17600
5837.84	P56382	Atp5f1e	ATP synthase subunit epsilon, mitochondrial	ATP5E_MOUSE	2	2	3	3	2	3	2	2	3	3	2	2	3	2	2	2	2	3	2	2	760773	527777	1.39942e+06	998582	910133	856110	998937	818702	1.09985e+06	1.1159e+06	1.26858e+06	703610	1.0399e+06	693728	1.15434e+06	1.06686e+06	866250	875760	1.02804e+06	869424	5837.84	P56382	Atp5f1e		5837.84
12158.7	O35143	Atp5if1	ATPase inhibitor, mitochondrial	ATIF1_MOUSE	0	0	2	2	0	0	1	0	1	1	0	0	0	0	0	1	0	1	1	1	NaN	NaN	514666	478692	NaN	NaN	431095	NaN	425674	442035	NaN	NaN	NaN	NaN	NaN	448121	NaN	530007	652955	581956	12158.7	O35143	Atp5if1		12158.7
15476.14;14745.24;14199.73	P56383;P56384;Q9CR84	Atp5mc2;Atp5mc3;Atp5mc1	AT5ATP synthase F(0) complex subunit C2, mitochondrial;AT5ATP synthase F(0) complex subunit C3, mitochondrial;AT5ATP synthase F(0) complex subunit C1, mitochondrial	AT5G2_MO;AT5G3_MO;AT5G1_MO	1	1	1	1	0	1	1	0	1	1	0	1	1	1	1	1	1	1	1	1	30187.7	33292.9	69247.2	48772	NaN	67012.7	43100.6	NaN	45329.8	55356.1	NaN	28782.1	71089.2	40746.3	77913.7	67595.3	52681.3	38827	44698.1	34722.8	15476.1	P56383	Atp5mc2		15476.1
8235.6	Q06185	Atp5me	ATP synthase subunit e, mitochondrial	ATP5I_MOUSE	5	5	5	5	4	5	5	4	5	5	4	4	5	5	4	5	3	3	3	4	650547	426764	1.33851e+06	980839	647760	584818	726479	474886	758038	1.0312e+06	913121	542935	1.22565e+06	800469	1111431	1.06241e+06	763177	736903	787879	756635	8235.6	Q06185	Atp5me		8235.6
10344.2	P56135	Atp5mf	ATP synthase subunit f, mitochondrial	ATPK_MOUSE	4	4	4	4	4	4	4	4	4	4	4	4	4	4	4	4	4	4	4	4	1.62836e+06	1.28174e+06	3.9141e+06	2.60403e+06	2417287	2.24356e+06	2.69281e+06	1.82839e+06	2.70442e+06	2.86839e+06	3.42443e+06	1.92002e+06	2.59596e+06	1770118	2.88768e+06	2.95418e+06	1.87084e+06	2.37812e+06	3.0543e+06	2.46026e+06	10344.2	P56135	Atp5mf		10344.2
11424.5	Q9CPQ8	Atp5mg	ATP synthase subunit g, mitochondrial	ATP5L_MOUSE	3	2	5	5	2	3	3	3	3	3	3	3	4	3	3	3	3	3	3	3	544024	448239	1301528	908484	777473	654127	842830	625005	938174	946714	1.04709e+06	613330	790204	539936	965039	921114	702725	799021	928359	802528	11424.5	Q9CPQ8	Atp5mg		11424.5
6560.83;6697.97	A0A1Y7VLP0;P56379	Atp5mj;Atp5mpl	A0A1Y7ATP synthase membrane subunit 6.8PL (Fragment);ATP synthase subunit ATP5MPL, mitochondrial	A0A1Y7VLP0;ATP68_MOUSE	1	1	1	1	1	1	1	1	1	1	1	0	1	1	1	1	1	1	1	1	94155.3	44595.8	223418	140293	157134	110108	149026	124819	185311	249642	234549	NaN	210765	105454	292637	261355	102892	123917	184469	120301	6560.83	A0A1Y7VLP0	Atp5mj		6560.83
6381.52	Q78IK2	Atp5mk	ATP synthase membrane subunit K, mitochondrial	ATPMK_MOUSE	1	0	2	2	1	2	2	1	1	2	2	2	2	2	1	1	1	2	2	2	336678	NaN	838490	644173	496602	381003	537010	340885	579652	670422	726636	457540	546846	417410	683553	628036	488744	649158	830162	588703	6381.52	Q78IK2	Atp5mk		6381.52
28948.8	Q9CQQ7	Atp5pb	AT5ATP synthase F(0) complex subunit B1, mitochondrial	AT5F1_MO	14	15	19	18	17	16	17	17	16	16	16	15	17	17	16	17	14	15	17	17	1892799	1.7493e+06	4399597	3.04438e+06	3.01637e+06	2.65242e+06	3272523	2.6309e+06	3.35593e+06	3.5734e+06	4.19555e+06	2.3487e+06	3.00084e+06	2184307	3.73059e+06	3981870	2638700	2.74323e+06	3.33147e+06	3.00876e+06	28948.8	Q9CQQ7	Atp5pb		28948.8
18749.5	Q9DCX2	Atp5pd	ATP synthase subunit d, mitochondrial	ATP5H_MOUSE	13	14	17	17	13	14	15	12	14	14	14	12	15	14	13	13	13	14	14	12	2971440	2.41232e+06	5.75475e+06	4345626	3.91996e+06	3370929	4201599	2.98815e+06	4.26088e+06	5004225	5.28399e+06	3.08802e+06	4118342	3.23319e+06	5.2836e+06	4.78186e+06	3.88603e+06	4.09944e+06	4.82142e+06	4.07046e+06	18749.5	Q9DCX2	Atp5pd		18749.5
12496.4	P97450	Atp5pf	ATP synthase-coupling factor 6, mitochondrial	ATP5J_MOUSE	4	4	5	6	3	3	4	3	4	4	3	3	4	4	4	3	4	4	3	4	81271.8	103155	243087	236216	72528.5	70701.8	101784	64426.2	102094	188785	126949	87123.2	283115	180594	203798	122519	139983	127576	79719.3	77378.8	12496.4	P97450	Atp5pf		12496.4
23363.5	Q9DB20	Atp5po	ATP synthase subunit O, mitochondrial	ATPO_MOUSE	11	11	13	13	10	12	11	10	11	11	11	11	11	11	11	11	10	11	11	11	2.17168e+06	1.68351e+06	6494546	4.64504e+06	2.96671e+06	2891301	3.19479e+06	2.31013e+06	3.27792e+06	3451907	3952138	2.73928e+06	4107561	2.39348e+06	3.53777e+06	3.47108e+06	2.76278e+06	3110190	3.91853e+06	3.01511e+06	23363.5	Q9DB20	Atp5po		23363.5
51007.6	Q9R1Q9	Atp6ap1	V-type proton ATPase subunit S1	VAS1_MOUSE	10	9	12	11	9	10	11	8	10	9	11	10	9	11	11	9	5	10	10	8	184906	133224	490152	456428	259134	268504	284516	177864	281131	278465	408310	314830	211718	232256	335919	296353	100327	220909	245014	153818	51007.6	Q9R1Q9	Atp6ap1		51007.6
39092	Q9CYN9	Atp6ap2	Renin receptor	RENR_MOUSE	11	8	13	13	10	11	10	9	10	12	12	11	10	9	8	9	6	8	8	9	209661	170342	512271	461169	275065	258480	291637	192023	295891	334021	406277	299225	257051	194864	330592	319624	184700	246852	243761	256435	39092	Q9CYN9	Atp6ap2		39092
96466.89;96466.89-2;96466.89-3	Q9Z1G4;Q9Z1G4-2;Q9Z1G4-3	Atp6v0a1	V-type proton ATPase 116 kDa subunit a 1;Isoform A1-I of V-type proton ATPase 116 kDa subunit a 1;Isoform A1-III of V-type proton ATPase 116 kDa subunit a 1	VPP1_MOUSE	13	12	16	17	12	14	12	11	14	16	13	16	15	11	14	12	10	15	13	13	222415	149665	499433	522258	303224	324135	329593	226384	316734	327417	370710	389568	295552	209460	343284	333090	222822	292477	370672	284834	96466.9	Q9Z1G4	Atp6v0a1		96466.9
98145.3	P15920	Atp6v0a2	V-type proton ATPase 116 kDa subunit a 2	VPP2_MOUSE	11	7	13	15	13	13	12	13	13	12	12	12	12	10	12	11	10	12	13	11	135301	65942.7	288643	278350	243357	224565	238689	172903	229950	269797	294818	222135	218901	155980	250340	226262	167558	212837	298363	210123	98145.3	P15920	Atp6v0a2		98145.3
15807.9	P63082	Atp6v0c	V-type proton ATPase 16 kDa proteolipid subunit c	VATL_MOUSE	1	2	2	2	1	1	1	1	2	2	1	2	2	0	1	1	1	2	1	1	50235.8	68823.7	413420	354295	59795.4	63841.8	44898.8	42794.5	52176.4	65130	58958.2	112220	108645	NaN	19372.9	66949.2	65323.8	88166.3	107533	68526.6	15807.9	P63082	Atp6v0c		15807.9
40301.1	P51863	Atp6v0d1	VA0V-type proton ATPase subunit d 1	VA0D1_MO	6	5	12	9	10	10	10	10	9	12	10	10	12	9	10	9	6	10	9	10	64986.4	201856	423005	281191	463968	405292	248261	226999	537269	633462	519048	480632	254116	286034	734458	349721	194321	319815	262286	785099	40301.1	P51863	Atp6v0d1		40301.1
68326.1	P50516	Atp6v1a	V-type proton ATPase catalytic subunit A	VATA_MOUSE	28	28	34	32	28	29	31	29	27	28	27	29	30	26	31	28	26	27	30	28	1.18198e+06	951180	2.65983e+06	2108767	2.24138e+06	2.07909e+06	2.61683e+06	1.77331e+06	2.3576e+06	2.59899e+06	3.01936e+06	2408997	2.29772e+06	1.66437e+06	3074987	2.86114e+06	1.74557e+06	1.84331e+06	2.66675e+06	2.06032e+06	68326.1	P50516	Atp6v1a		68326.1
56550.8	P62814	Atp6v1b2	V-type proton ATPase subunit B, brain isoform	VATB2_MOUSE	21	20	24	24	21	20	21	21	21	20	21	21	21	21	21	20	18	19	20	21	976470	735953	1.88024e+06	1.56684e+06	1.70026e+06	1.57218e+06	1.92385e+06	1.47182e+06	1.86017e+06	2.00841e+06	2.29482e+06	1.76024e+06	1.70527e+06	1.27901e+06	2.38712e+06	2.13922e+06	1.41128e+06	1.4462e+06	2.07731e+06	1.58581e+06	56550.8	P62814	Atp6v1b2		56550.8
43887.6	Q9Z1G3	Atp6v1c1	V-type proton ATPase subunit C 1	VATC1_MOUSE	18	16	22	22	19	19	19	18	20	17	18	19	19	19	19	19	17	19	17	19	356943	234092	706852	593444	642670	581908	743382	466216	781087	782039	909731	693426	666718	545301	902866	843136	532830	432177	579575	518053	43887.6	Q9Z1G3	Atp6v1c1		43887.6
28369	P57746	Atp6v1d	V-type proton ATPase subunit D	VATD_MOUSE	11	6	11	9	11	11	11	11	11	11	11	11	11	11	11	11	5	10	11	11	178850	89629.6	323393	201247	298229	273645	322027	275600	339498	333935	384065	305603	297143	193819	417752	386198	109634	258667	354120	268992	28369	P57746	Atp6v1d		28369
26157.4	P50518	Atp6v1e1	V-type proton ATPase subunit E 1	VATE1_MOUSE	8	9	10	10	10	9	10	11	10	11	10	10	10	9	10	9	8	10	9	10	276142	221520	581946	532834	434357	495842	556289	379232	441904	523347	572000	518417	490763	371760	578519	549697	341346	397501	518017	418650	26157.4	P50518	Atp6v1e1		26157.4
13370.3	Q9D1K2	Atp6v1f	V-type proton ATPase subunit F	VATF_MOUSE	2	0	3	2	3	2	4	4	4	4	4	4	4	1	4	4	0	0	0	2	13103.9	NaN	50892.5	27894.4	32426.8	42253	65644.8	72390.6	105415	132072	86173.9	66093.7	75636.2	11714.7	188570	216603	NaN	NaN	NaN	21403	13370.3	Q9D1K2	Atp6v1f		13370.3
13724.4	Q9CR51	Atp6v1g1	V-type proton ATPase subunit G 1	VATG1_MOUSE	4	4	4	3	4	4	5	5	4	4	5	4	4	5	5	4	3	4	4	4	130509	105640	272305	212666	264702	229894	304244	246241	290618	310481	343707	250468	236336	176595	353210	318670	211136	220146	317590	235408	13724.4	Q9CR51	Atp6v1g1		13724.4
55855	Q8BVE3	Atp6v1h	V-type proton ATPase subunit H	VATH_MOUSE	18	15	19	19	19	17	20	17	20	20	20	19	21	17	19	19	11	17	19	19	292332	228164	617188	531054	581127	497034	710495	457845	640336	703312	849951	642798	575826	392418	821208	815002	285374	357886	557159	466510	55855	Q8BVE3	Atp6v1h		55855
161959	Q64430	Atp7a	Copper-transporting ATPase 1	ATP7A_MOUSE	2	0	0	3	5	2	2	2	5	5	4	6	0	2	3	4	0	3	0	0	18027.3	NaN	NaN	18709.2	36671	16682.5	14241.3	11808.9	50230.6	40370.2	36629.6	38104.4	NaN	19942.2	22819	40772.6	NaN	15881.2	NaN	NaN	161959	Q64430	Atp7a		161959
129767	P70704-2	Atp8a1	AT8Isoform 2 of Phospholipid-transporting ATPase IA	AT8A1_MO	11	7	18	21	18	17	18	17	18	16	18	19	21	16	16	16	18	25	23	24	66316.8	32023.5	227340	266712	190668	177996	255749	170586	194041	191107	216109	196987	208120	135683	241558	210152	249421	400117	452570	418397	129767	P70704-2	Atp8a1		129767
143798	Q148W0	Atp8b1	AT8Phospholipid-transporting ATPase IC	AT8B1_MO	0	0	0	1	0	0	0	0	0	0	0	0	0	0	0	1	0	0	0	0	NaN	NaN	NaN	2.115858793258667	NaN	NaN	NaN	NaN	NaN	NaN	NaN	NaN	NaN	NaN	NaN	2859.217041015625	NaN	NaN	NaN	NaN	143798	Q148W0	Atp8b1		143798
118609	O70228	Atp9a	Probable phospholipid-transporting ATPase IIA	ATP9A_MOUSE	0	0	0	0	0	0	0	0	0	0	1	0	0	0	0	0	0	0	0	0	NaN	NaN	NaN	NaN	NaN	NaN	NaN	NaN	NaN	NaN	1756.3	NaN	NaN	NaN	NaN	NaN	NaN	NaN	NaN	NaN	118609	O70228	Atp9a		118609
129017.06;129017.06-2	P98195;P98195-2	Atp9b	Probable phospholipid-transporting ATPase IIB;Isoform 2 of Probable phospholipid-transporting ATPase IIB	ATP9B_MOUSE	10	11	15	16	13	14	14	10	15	14	12	13	15	13	16	13	9	12	12	15	110296	83348.7	280684	227385	221098	146021	227683	97747.9	242948	245410	246383	210566	205736	123358	267501	206766	92638.2	142175	249054	200766	129017	P98195	Atp9b		129017
36354.5	Q811I0	Atpaf1	ATP synthase mitochondrial F1 complex assembly factor 1	ATPF1_MOUSE	5	5	8	5	7	4	5	7	5	6	5	5	6	3	5	7	2	6	5	5	32315.1	25879.9	87116.9	44306.9	70904.6	40809.6	68397.3	55434.9	58565.6	66575.4	75379.4	41537.4	64470.8	24050.5	78190	89023.7	22898.5	57069	63619.6	52570.6	36354.5	Q811I0	Atpaf1		36354.5
33289	Q91YY4	Atpaf2	ATP synthase mitochondrial F1 complex assembly factor 2	ATPF2_MOUSE	6	7	8	8	7	7	8	7	5	8	6	7	6	5	8	6	5	6	5	5	73685.4	64774.8	157440	111523	121911	93436.4	133323	80616.1	122115	154374	165960	80278.6	98856.5	71471.3	150923	143397	65199	83255.5	93562.6	78302.3	33289	Q91YY4	Atpaf2		33289
27397.3	Q9D1Z3	Atpsckmt	ATP synthase subunit C lysine N-methyltransferase	ACKMT_MOUSE	0	0	0	3	0	2	0	0	2	2	3	0	0	1	4	0	0	0	3	0	NaN	NaN	NaN	10426.6	NaN	19118.5	NaN	NaN	9123.13	16786.8	18825.8	NaN	NaN	6039.91	39969.1	NaN	NaN	NaN	15424.7	NaN	27397.3	Q9D1Z3	Atpsckmt		27397.3
300224	Q9JKK8	Atr	Serine/threonine-protein kinase ATR	ATR_MOUSE	11	6	24	14	26	17	24	20	27	32	28	22	30	17	27	28	6	14	11	14	62954.9	29137.6	213360	70325.7	205711	98893.3	211722	136188	216226	322016	320448	133431	229644	149571	442733	321992	40005.2	74097	84772.7	74928.8	300224	Q9JKK8	Atr		300224
85547.5	Q8BMG1	Atrip	ATR-interacting protein	ATRIP_MOUSE	3	2	2	3	5	4	4	3	6	7	4	6	5	3	5	6	1	3	2	2	11805.3	6293.9	18524.2	26258.6	23047.6	22367.3	18225	43536.6	87331.8	66455.4	40086.5	26939.6	46199.9	54190	35565.7	99506.1	7192.61	51321.3	8035.06	41567	85547.5	Q8BMG1	Atrip		85547.5
158058	Q9WU60	Atrn	Attractin	ATRN_MOUSE	0	1	1	2	1	2	1	1	0	1	1	0	1	0	1	2	0	0	0	0	NaN	3909.25	8096.97	9338.53	6139.96	7203.49	7232.86	6294.31	NaN	8816.31	7548.07	NaN	1763.2352294921875	NaN	6263.36	9768.02	NaN	NaN	NaN	NaN	158058	Q9WU60	Atrn		158058
278587	Q61687	Atrx	Transcriptional regulator ATRX	ATRX_MOUSE	43	41	50	47	48	51	48	44	52	52	52	52	50	46	50	51	40	47	52	50	536229	458133	1.13319e+06	985470	957517	969599	1.13053e+06	844384	1.32822e+06	1.38594e+06	1.56169e+06	1.08732e+06	1.11256e+06	765104	1.4321e+06	1.51225e+06	930310	1.2385e+06	1.62535e+06	1.34656e+06	278587	Q61687	Atrx		278587
53706.9	P28658	Atxn10	Ataxin-10	ATX10_MOUSE	21	18	19	19	22	20	22	20	21	21	22	20	22	20	21	21	12	16	16	18	522273	429299	1.36949e+06	676754	1.26917e+06	1.15496e+06	1.57626e+06	1.0734e+06	1.44595e+06	1.62655e+06	1.85567e+06	1.28598e+06	1.37109e+06	933198	2.01175e+06	1.94659e+06	176920	214828	332275	587037	53706.9	P28658	Atxn10		53706.9
73374.3	P0C7T6	Atxn1l	Ataxin-1-like	ATX1L_MOUSE	1	0	4	2	0	0	0	0	2	2	2	1	0	0	0	2	3	5	5	0	4735.51	NaN	31754.1	16337.4	NaN	NaN	NaN	NaN	15521.3	24720.1	20693.9	7521.71	NaN	NaN	NaN	18426.9	22657.8	42562.1	51192.2	NaN	73374.3	P0C7T6	Atxn1l		73374.3
136485.1;136485.1-2	O70305;O70305-2	Atxn2	Ataxin-2;Isoform 2 of Ataxin-2	ATX2_MOUSE	17	10	18	19	17	15	17	13	19	19	19	18	19	19	18	16	6	15	10	9	149097	67182.2	308839	202245	201917	198822	246183	135320	281452	368828	358027	252839	252913	139362	338162	303979	59982.2	102759	116351	62679.3	136485	O70305	Atxn2		136485
113043	Q7TQH0-2	Atxn2l	Isoform 2 of Ataxin-2-like protein	ATX2L_MOUSE	40	41	43	41	43	44	43	45	43	44	45	43	45	44	43	42	30	36	37	39	1.52869e+06	1.27711e+06	2.80962e+06	2274627	2.42863e+06	2.47563e+06	2.89743e+06	2.21013e+06	2.85276e+06	3.03518e+06	3.45655e+06	2666145	2.52217e+06	2.07284e+06	3.33095e+06	2996587	882299	994166	1408005	1.21225e+06	113043	Q7TQH0-2	Atxn2l		113043
40533.3	Q9CVD2	Atxn3	Ataxin-3	ATX3_MOUSE	9	7	12	13	10	11	12	7	9	9	10	9	10	9	12	11	9	10	10	9	76721.4	58096.6	232369	129814	155823	168774	173363	107468	165629	203858	248120	115164	135125	96782.2	256526	224575	120851	164004	180886	135016	40533.3	Q9CVD2	Atxn3		40533.3
69998.95;74014.58;74057.61;73986.53	B7ZCC4;B7ZMR6;Q5HZJ2;Q8C8K6	Atxn7l2	B7Ataxin 7-like 2;B7Atxn7l2 protein;Q5Atxn7l2 protein (Fragment);Q8C8Ataxin 7-like 2	B7ZCC4_MOU;B7ZMR6_MOU;Q5HZJ2_MOU;Q8C8K6_M	1	0	2	2	4	0	0	0	4	3	3	0	3	0	4	3	0	0	1	0	2039.7813720703125	NaN	5388.14	8524.02	15917.6	NaN	NaN	NaN	17533	21669.1	18711.1	NaN	16355.9	NaN	24895.5	27756	NaN	NaN	1790.68	NaN	69998.9	B7ZCC4	Atxn7l2		69998.9
38593.92;38593.92-2	A2AWT3;A2AWT3-2	Atxn7l3	AT7Ataxin-7-like protein 3;AT7Isoform 2 of Ataxin-7-like protein 3	AT7L3_MO	0	0	3	0	2	2	2	2	0	3	3	2	2	1	3	0	0	0	1	2	NaN	NaN	20747.2	NaN	8425.68	7964.38	12971.7	6558.1	NaN	16484	17913.9	8570.84	14146.1	11584	22520.3	NaN	NaN	NaN	4304.66	8718.61	38593.9	A2AWT3	Atxn7l3		38593.9
33395	Q9JLZ3	Auh	Methylglutaconyl-CoA hydratase, mitochondrial	AUHM_MOUSE	9	8	9	9	9	9	9	9	9	9	9	9	9	9	9	9	7	9	9	8	340379	282840	721962	572084	482732	397973	578800	380774	563162	601218	685825	380576	466721	286523	627757	672738	267635	311332	412162	311871	33395	Q9JLZ3	Auh		33395
46121.3	P70295	Aup1	Lipid droplet-regulating VLDL assembly factor AUP1	AUP1_MOUSE	9	7	12	12	9	8	9	9	8	7	8	8	8	8	8	9	7	10	9	9	169016	146859	411121	283450	276122	216662	332778	229540	306801	246643	297944	240549	225031	181834	337929	320592	162727	302179	347867	331330	46121.3	P70295	Aup1		46121.3
44772.04;44772.04-2	P97477;P97477-2	Aurka	Aurora kinase A;Isoform 2 of Aurora kinase A	AURKA_MOUSE	0	0	0	0	0	0	0	0	5	5	0	0	3	0	4	5	0	0	0	0	NaN	NaN	NaN	NaN	NaN	NaN	NaN	NaN	69688.4	82923.3	NaN	NaN	53778.8	NaN	97740.3	101922	NaN	NaN	NaN	NaN	44772	P97477	Aurka		44772
23300.3	Q9DCJ7	Aurkaip1	Small ribosomal subunit protein mS38	AKIP_MOUSE	2	0	2	0	0	1	2	2	2	2	2	0	0	2	2	0	0	2	2	2	119406	NaN	161841	NaN	NaN	149710	158974	115146	297368	370706	342975	NaN	NaN	114135	274836	NaN	NaN	91393.9	118982	98641.1	23300.3	Q9DCJ7	Aurkaip1		23300.3
39384.3	O70126	Aurkb	Aurora kinase B	AURKB_MOUSE	7	5	9	3	8	7	8	9	8	8	9	6	8	8	8	8	0	0	4	3	62757.4	41377.3	135015	20756.5	137039	97929.5	185943	134208	228246	266516	323985	49884	219168	111249	308074	344015	NaN	NaN	27514.2	19732.2	39384.3	O70126	Aurkb		39384.3
37195.5	Q9D9K3	Aven	Cell death regulator Aven	AVEN_MOUSE	10	8	8	7	11	11	11	10	12	11	12	8	11	10	11	11	0	0	0	0	99171.3	62959.7	159064	93063.3	172005	139075	182951	145645	242343	237838	300286	122311	143122	127960	220162	248496	NaN	NaN	NaN	NaN	37195.5	Q9D9K3	Aven		37195.5
72185.6	Q80U56	Avl9	Late secretory pathway protein AVL9 homolog	AVL9_MOUSE	10	12	14	12	14	13	11	13	10	14	11	13	11	11	12	12	10	10	12	12	148413	129783	379743	292041	296063	286633	308752	221426	297219	337240	351716	306253	268385	195952	288764	337970	177378	193525	313663	222039	72185.6	Q80U56	Avl9		72185.6
96275.65;96275.65-2	O35625;O35625-2	Axin1	Axin-1;Isoform 2 of Axin-1	AXIN1_MOUSE	0	0	2	2	2	0	2	0	2	0	0	2	0	1	1	0	1	3	2	0	NaN	NaN	9674.96	5788.3	8473.2	NaN	14809.5	NaN	13430.6	NaN	NaN	6368.83	NaN	2558.819091796875	8508.59	NaN	6036.33	10251.8	12178.1	NaN	96275.6	O35625	Axin1		96275.6
11318.5	B1ARW8		Uncharacterized protein C1orf122 homolog	CA122_MOUSE	3	0	2	1	2	0	1	0	3	1	2	0	1	2	0	3	0	0	0	0	18837.7	NaN	19586.1	7926.51	19080.7	NaN	11691.9	NaN	37737.4	12186.9	20624.9	NaN	7678.06	12427.2	NaN	33793.7	NaN	NaN	NaN	NaN	11318.5	B1ARW8			11318.5
13779	P01887	B2m	Beta-2-microglobulin	B2MG_MOUSE	2	1	3	3	1	1	1	2	2	2	1	2	3	1	1	1	2	2	2	2	142151	91035.9	529332	339241	159858	108979	167776	181080	190641	261687	217622	179760	274267	178246	331442	318534	154849	171595	173176	112118	13779	P01887	B2m		13779
57218.9	Q8BG28	B3galnt2	B3UDP-GalNAc:beta-1,3-N-acetylgalactosaminyltransferase 2	B3GL2_MOU	0	1	0	0	0	0	0	3	1	2	2	0	0	0	0	0	0	0	0	0	NaN	6951.76	NaN	NaN	NaN	NaN	NaN	9157.27	11296.6	16847	19986.8	NaN	NaN	NaN	NaN	NaN	NaN	NaN	NaN	NaN	57218.9	Q8BG28	B3galnt2		57218.9
37021.2	Q91Z92	B3galt6	B3Beta-1,3-galactosyltransferase 6	B3GT6_MOU	6	4	10	10	8	7	9	3	5	6	8	8	7	4	7	6	2	4	2	4	45665.3	30250.7	156702	143660	86398.9	92953.2	134390	45673.4	64511.7	83592.1	152859	105416	69794.8	42432.8	94217.7	88561.6	14010.3	31731.5	26574	27034.4	37021.2	Q91Z92	B3galt6		37021.2
37066.9	P58158	B3gat3	B3Galactosylgalactosylxylosylprotein 3-beta-glucuronosyltransferase 3	B3GA3_MOU	0	2	4	5	2	3	5	2	3	4	4	6	5	2	3	3	2	2	5	5	NaN	7160.32	41003.7	63428.1	16567.8	38580.8	52178.4	17269.6	27643.7	39905.2	43671.7	57823.9	45529.4	12719.8	34280.9	28648.8	14900.2	11366.7	42112.3	31198	37066.9	P58158	B3gat3		37066.9
45883	Q9Z222	B3GNT2	B3N-acetyllactosaminide beta-1,3-N-acetylglucosaminyltransferase 2	B3GN2_MOU	7	7	8	8	8	7	8	6	8	8	8	8	6	5	7	7	2	7	4	5	63032.7	51519.2	140268	101267	122133	90479.7	126179	103059	118114	140647	157516	95827.6	95251.6	60767.7	132097	123868	22128.3	61627.7	41242.4	44022.8	45883	Q9Z222	B3GNT2		45883
43370.2	Q8R3I9	B3gnt8	B3UDP-GlcNAc:betaGal beta-1,3-N-acetylglucosaminyltransferase 8	B3GN8_MOU	0	0	3	4	2	3	4	2	1	0	4	0	0	0	2	0	4	5	5	5	NaN	NaN	16670.4	27568	16550.4	10553.7	22620.7	7762.58	4255.51	NaN	29208.2	NaN	NaN	NaN	18702.8	NaN	49862.7	72526.2	90379.2	67393.2	43370.2	Q8R3I9	B3gnt8		43370.2
59211.9	Q09200	B4galnt1	B4Beta-1,4 N-acetylgalactosaminyltransferase 1	B4GN1_MOU	9	6	12	13	12	11	10	11	11	12	11	10	13	9	12	11	10	12	10	12	133941	87091.1	348468	316567	406775	297421	373991	301483	296736	341725	388619	247288	344890	195909	437589	401701	319349	373159	474898	404540	59211.9	Q09200	B4galnt1		59211.9
44411.1	P15535	B4galt1	B4Beta-1,4-galactosyltransferase 1	B4GT1_MOU	6	6	8	8	7	8	7	7	6	7	7	7	6	6	6	6	5	6	6	6	132957	98406	263927	276549	259655	227302	279903	189453	285717	299416	347967	283032	239521	180315	317159	336885	70819.5	96154	131587	107381	44411.1	P15535	B4galt1		44411.1
44814.2	Q9JMK0	B4galt5	B4Beta-1,4-galactosyltransferase 5	B4GT5_MOU	5	3	6	3	3	2	4	0	3	2	3	1	2	1	0	0	0	0	0	0	49052.9	18044.7	97092.2	33189	26453.5	11812.1	25073.8	NaN	32429	15910.5	34483.5	4323.3	14178	2069.737060546875	NaN	NaN	NaN	NaN	NaN	NaN	44814.2	Q9JMK0	B4galt5		44814.2
37754.27;37754.27-2	Q8R087;Q8R087-2	B4galt7	B4Beta-1,4-galactosyltransferase 7;B4Isoform 2 of Beta-1,4-galactosyltransferase 7	B4GT7_MOU	1	1	2	1	2	2	2	1	1	0	1	1	1	1	1	1	0	0	1	2	6205.17	7260.7	16834.9	9859.58	15262.5	12346.4	17154	7313.46	8691.96	NaN	10181.5	6921.46	13262.8	4722.11	10987.9	10595	NaN	NaN	9598.13	8294.51	37754.3	Q8R087	B4galt7		37754.3
36793.1	Q3UI43	Babam1	BRISC and BRCA1-A complex member 1	BABA1_MOUSE	7	6	7	6	8	7	7	7	9	9	9	8	8	9	9	9	8	9	8	7	99508.6	56466	225924	110071	225573	176884	222707	165272	240223	241861	276463	164535	282944	188283	320231	285247	196890	212970	231828	181755	36793.1	Q3UI43	Babam1		36793.1
43544.7	Q8K3W0	Babam2	BRISC and BRCA1-A complex member 2	BABA2_MOUSE	9	7	13	12	10	11	12	10	12	9	11	11	11	11	12	9	10	8	11	10	175757	82084.3	431096	258876	373945	338575	399040	251029	372446	370997	447917	326480	364848	281917	472978	402646	260398	248353	440160	368143	43544.7	Q8K3W0	Babam2		43544.7
91836	P97303	Bach2	Transcription regulator protein BACH2	BACH2_MOUSE	6	6	12	6	13	12	15	10	11	12	9	5	15	8	15	13	12	14	17	15	46888.8	37776.2	174416	63740.4	166889	153633	211674	126243	133164	188418	158254	67704.4	173546	92106.9	241820	191655	205194	205980	327998	212275	91836	P97303	Bach2		91836
39740.3	Q60739	Bag1	BAG family molecular chaperone regulator 1	BAG1_MOUSE	12	10	15	15	14	14	13	13	13	14	13	15	14	13	14	13	13	14	15	15	242839	195197	564054	396019	471483	454353	574238	392621	502367	544284	636086	471252	495075	350051	644295	584968	496389	458080	646551	500351	39740.3	Q60739	Bag1		39740.3
23473.6	Q91YN9	Bag2	BAG family molecular chaperone regulator 2	BAG2_MOUSE	0	0	1	0	0	0	1	0	3	6	5	0	2	0	5	2	0	0	0	0	NaN	NaN	9944.18	NaN	NaN	NaN	10382	NaN	48548.3	78276.9	72603.4	NaN	33377.6	NaN	67016	31664.6	NaN	NaN	NaN	NaN	23473.6	Q91YN9	Bag2		23473.6
49094.7	Q8CI61	Bag4	BAG family molecular chaperone regulator 4	BAG4_MOUSE	4	3	3	4	4	3	4	3	3	4	5	3	4	3	4	4	2	4	4	5	22994.9	14248.3	40720.1	44639.6	38121.6	32112.6	56852.9	23598.2	43679.8	64616.1	78762.5	34084	47455.8	25575.4	58636.5	43475.1	17063.8	28346.3	43098	54930.8	49094.7	Q8CI61	Bag4		49094.7
50942.5	Q8CI32	Bag5	BAG family molecular chaperone regulator 5	BAG5_MOUSE	11	10	16	16	16	13	14	14	16	14	13	13	14	13	16	14	11	14	16	15	325560	141350	689024	477577	637399	485244	374429	473735	671173	696950	826614	495422	608434	409065	876692	429553	277891	588476	846218	660297	50942.5	Q8CI32	Bag5		50942.5
121037	Q9Z1R2	Bag6	Large proline-rich protein BAG6	BAG6_MOUSE	25	25	27	26	26	24	27	25	27	26	28	27	27	26	27	27	19	22	22	22	681611	474929	1.41639e+06	983386	1.10481e+06	999973	1248868	937983	1.32509e+06	1.65273e+06	1.71693e+06	1.05332e+06	1.36359e+06	921970	1.69529e+06	1.63028e+06	473162	548258	694845	515440	121037	Q9Z1R2	Bag6		121037
83871.02;83871.02-2	Q497V6;Q497V6-2	Bahd1	Bromo adjacent homology domain-containing 1 protein;Isoform 2 of Bromo adjacent homology domain-containing 1 protein	BAHD1_MOUSE	3	3	5	8	5	5	4	4	5	4	4	6	5	5	5	5	0	5	5	5	18694	17532.5	46586.7	106489	40302.2	57807.4	49243.7	30125.2	55203.1	58492.8	67138.7	104509	59788.5	49640.4	72859.9	80512.5	NaN	50624.9	56911	44866.2	83871	Q497V6	Bahd1		83871
59236.87;59236.87-2;59236.87-3;59236.87-4	Q8BKX1;Q8BKX1-2;Q8BKX1-3;Q8BKX1-4	Baiap2	Brain-specific angiogenesis inhibitor 1-associated protein 2;Isoform 2 of Brain-specific angiogenesis inhibitor 1-associated protein 2;Isoform 3 of Brain-specific angiogenesis inhibitor 1-associated protein 2;Isoform 4 of Brain-specific angiogenesis inhibitor 1-associated protein 2	BAIP2_MOUSE	3	0	0	0	5	2	5	4	6	3	8	0	5	1	7	7	1	3	3	0	18380.3	NaN	NaN	NaN	24277.7	122469	28357.3	18127.1	32759.1	28563	53354.1	NaN	28973.5	2450.84	197765	56040.3	6086.29	8156.34	16420	NaN	59236.9	Q8BKX1	Baiap2		59236.9
23294.6	O08734	Bak1	Bcl-2 homologous antagonist/killer	BAK_MOUSE	7	7	9	9	7	7	6	8	7	7	6	6	8	8	7	6	7	7	8	6	249024	203440	574099	594961	252824	337697	267732	349681	290307	370858	300171	249132	332947	263276	471399	305252	297341	397162	336395	235507	23294.6	O08734	Bak1		23294.6
10102.6	O54962	Banf1	Barrier-to-autointegration factor	BAF_MOUSE	6	3	6	5	6	6	6	6	5	6	6	5	7	6	7	6	5	6	6	5	126305	68936.6	292620	198125	180287	169735	223053	160002	251458	329392	262306	171992	390105	247184	446021	484872	171913	185441	220634	169572	10102.6	O54962	Banf1		10102.6
89405.7	Q80VH0	Bank1	B-cell scaffold protein with ankyrin repeats	BANK1_MOUSE	28	25	30	28	31	29	30	28	29	30	29	29	30	29	29	30	29	30	32	34	636347	561272	1.45309e+06	1.36975e+06	1.39782e+06	1.28094e+06	1.61647e+06	1.00591e+06	1.41293e+06	1.66371e+06	1.89996e+06	1.53763e+06	1.51222e+06	1072090	1.84794e+06	1.75052e+06	2.24148e+06	2.77952e+06	3.83139e+06	3099732	89405.7	Q80VH0	Bank1		89405.7
59656.7;59656.7-4	Q8VBU8;Q8VBU8-4	Banp	Protein BANP;Isoform 4 of Protein BANP	BANP_MOUSE	4	2	6	5	5	6	4	3	4	7	8	5	5	5	5	7	4	7	6	5	40423.3	24139.7	139246	96556.5	63815.2	96063.2	64561.5	35090.4	57805.4	101534	149377	55961.4	65617	49498.7	90073.3	131320	65279	95901.1	127984	83365.8	59656.7	Q8VBU8	Banp		59656.7
80491.7	Q99PU7	Bap1	Ubiquitin carboxyl-terminal hydrolase BAP1	BAP1_MOUSE	3	3	7	5	9	6	6	5	7	7	8	6	8	6	7	7	3	6	8	4	22568.1	13564.9	92637.5	55950.8	69971.6	33909	56138.9	33563.9	84827.6	76223.1	224511	32472.5	86269.7	51808.2	219604	57333.1	32959.4	46630.5	74754.3	28452.6	80491.7	Q99PU7	Bap1		80491.7
17996.48;17996.48-2	Q9DCT6;Q9DCT6-2	Bap18	Chromatin complexes subunit BAP18;Isoform 2 of Chromatin complexes subunit BAP18	BAP18_MOUSE	7	7	9	9	6	7	7	7	7	7	7	7	7	6	7	6	6	7	7	7	236755	188898	556933	483731	421811	437756	467077	303199	455624	477594	528363	436198	433643	323141	535611	473859	385044	433170	581593	464985	17996.5	Q9DCT6	Bap18		17996.5
84254.3	O70445	Bard1	BRCA1-associated RING domain protein 1	BARD1_MOUSE	0	0	0	0	0	0	2	0	0	4	3	0	2	0	0	5	0	0	0	0	NaN	NaN	NaN	NaN	NaN	NaN	9729.18	NaN	NaN	31316.8	21048.1	NaN	14771.1	NaN	NaN	43177.1	NaN	NaN	NaN	NaN	84254.3	O70445	Bard1		84254.3
22086.6	Q91XV3	Basp1	Brain acid soluble protein 1	BASP1_MOUSE	1	3	3	0	4	3	2	5	3	2	2	3	4	5	3	2	3	4	4	5	8215.83	18600	23165.9	NaN	33289.3	22740.4	24686.7	44710.3	17954.9	9977.92	6815.27	23469.7	38008	26026.1	28011.5	23245.9	24247.6	23169.1	48448.1	38295.5	22086.6	Q91XV3	Basp1		22086.6
14064.6	O35284	Batf	Basic leucine zipper transcriptional factor ATF-like	BATF_MOUSE	1	1	1	1	1	1	1	1	1	1	1	1	1	1	1	1	0	0	0	0	75361.3	58592.6	151171	71896.2	104691	109242	128155	71009.3	177181	183487	227107	80796.7	112547	83374.9	162367	143376	NaN	NaN	NaN	NaN	14064.6	O35284	Batf		14064.6
21394.6	Q07813	Bax	Apoptosis regulator BAX	BAX_MOUSE	7	8	10	10	9	9	9	8	8	9	9	9	9	8	9	8	6	7	8	8	662756	596026	1.46119e+06	1193615	1.0105e+06	1.20611e+06	1302085	938055	1.04941e+06	1292080	1.57076e+06	1.32623e+06	1.11832e+06	780431	1.55683e+06	1.38617e+06	482890	405727	544794	414072	21394.6	Q07813	Bax		21394.6
178459	O88379	Baz1a	Bromodomain adjacent to zinc finger domain protein 1A	BAZ1A_MOUSE	48	47	54	53	52	50	49	48	49	52	52	49	54	49	54	50	39	46	43	47	1.22624e+06	943449	2649406	2.2741e+06	1730739	1.8121e+06	1.94801e+06	1.46294e+06	2.29675e+06	2.64663e+06	3.00168e+06	2.0659e+06	1.94391e+06	1488864	2.66975e+06	2.50094e+06	991926	1.21312e+06	1.43435e+06	1290241	178459	O88379	Baz1a		178459
170651	Q9Z277	Baz1b	Tyrosine-protein kinase BAZ1B	BAZ1B_MOUSE	52	53	63	59	56	56	54	57	55	56	58	55	59	52	55	55	47	55	60	56	1.95357e+06	1.48583e+06	4141273	2.93851e+06	2.85268e+06	2.71821e+06	3.18052e+06	2458678	3363106	3.66727e+06	4.18232e+06	2.42022e+06	3027694	2.05904e+06	3.83065e+06	3.83443e+06	2.55886e+06	3.38321e+06	4197347	3.36419e+06	170651	Q9Z277	Baz1b		170651
209618.1;209618.1-2;209618.1-3	Q91YE5;Q91YE5-2;Q91YE5-3	Baz2a	Bromodomain adjacent to zinc finger domain protein 2A;Isoform 2 of Bromodomain adjacent to zinc finger domain protein 2A;Isoform 3 of Bromodomain adjacent to zinc finger domain protein 2A	BAZ2A_MOUSE	13	10	21	13	14	12	13	15	11	17	19	9	18	11	13	18	9	16	15	15	119659	90174.7	303036	141756	197481	127331	170634	149729	159430	242612	275807	78975.9	186386	112396	206741	530634	95416	401794	227162	179202	209618	Q91YE5	Baz2a		209618
234001	A2AUY4	Baz2b	Bromodomain adjacent to zinc finger domain protein 2B	BAZ2B_MOUSE	8	6	9	11	8	7	11	7	10	10	11	10	8	8	8	10	7	11	11	12	45838.7	32954.6	126885	102081	64175.4	60839.2	128392	51298.7	81395.3	78595.1	131594	95080.3	85084.7	62145.9	88442	104597	64216	97200.9	155428	107586	234001	A2AUY4	Baz2b		234001
20748.5	Q99ML1	Bbc3	Bcl-2-binding component 3	BBC3_MOUSE	0	0	1	3	0	0	0	0	0	1	0	2	3	0	2	3	0	0	0	0	NaN	NaN	4989.02	72683.5	NaN	NaN	NaN	NaN	NaN	4469.88	NaN	9930.9	35129.9	NaN	12102.6	35215	NaN	NaN	NaN	NaN	20748.5	Q99ML1	Bbc3		20748.5
100783	Q8VBW5	Bbx	HMG box transcription factor BBX	BBX_MOUSE	4	2	5	5	6	5	7	7	7	8	8	5	7	4	8	5	5	8	9	8	26293.5	18586	57276	42159.2	65212.1	48714.8	83331.3	58849.7	74987.5	99073.2	94923.4	45749.1	72384.7	39819.5	115006	73328.4	63602.8	87706.3	128014	109396	100783	Q8VBW5	Bbx		100783
27963.9	Q61334	Bcap29	B-cell receptor-associated protein 29	BAP29_MOUSE	8	8	10	10	8	9	8	7	10	9	6	8	10	7	8	8	6	7	8	7	168687	164012	397906	276644	241341	219827	261963	257443	329786	316141	322048	253206	236001	162690	325718	336983	124556	165147	204134	171700	27963.9	Q61334	Bcap29		27963.9
27956.5	Q61335	Bcap31	B-cell receptor-associated protein 31	BAP31_MOUSE	10	13	13	12	13	13	13	12	11	11	13	12	13	11	11	11	12	13	11	13	1.12144e+06	1.06861e+06	2.49019e+06	2.05442e+06	1.86036e+06	1.66018e+06	1.8512e+06	1.6674e+06	1.81674e+06	1.93788e+06	2.27126e+06	1.7734e+06	1.62877e+06	1.23118e+06	2.128e+06	2136019	1691149	2.21119e+06	2.58324e+06	2.2265e+06	27956.5	Q61335	Bcap31		27956.5
92263.1	Q9QZK2	Bcar3	Breast cancer anti-estrogen resistance protein 3 homolog	BCAR3_MOUSE	21	14	27	23	24	24	25	25	25	25	27	23	24	26	26	25	12	16	20	17	346584	161110	696183	442369	637228	612579	783334	529756	737119	817949	842644	466718	815473	605832	1.08638e+06	1.03478e+06	140699	217939	350596	237827	92263.1	Q9QZK2	Bcar3		92263.1
26131.4	Q9D287	Bcas2	Pre-mRNA-splicing factor SPF27	SPF27_MOUSE	14	13	14	15	14	14	14	14	14	14	14	14	14	14	14	14	14	14	14	14	589019	404366	1.17709e+06	843268	870352	745659	941687	598257	994734	1.10021e+06	1.30311e+06	782139	904332	632450	1.18563e+06	1.10233e+06	716872	962728	1.17165e+06	932662	26131.4	Q9D287	Bcas2		26131.4
101021	Q8CCN5	Bcas3	BCAS3 microtubule associated cell migration factor	BCAS3_MOUSE	8	8	14	13	12	10	13	10	10	10	13	10	12	7	13	14	9	13	12	13	52106.5	44673.6	219238	139037	146425	110538	159242	90710	132438	136353	177424	99170.5	117186	63270.1	193598	195582	95660.9	162971	188143	170936	101021	Q8CCN5	Bcas3		101021
42791.2	P24288	Bcat1	Branched-chain-amino-acid aminotransferase, cytosolic	BCAT1_MOUSE	7	6	9	6	10	8	9	9	8	10	8	6	10	7	9	9	0	0	2	0	133965	64128.7	288174	59929.5	288514	181463	336581	264820	260918	279878	337297	99781.5	177156	99237.5	288609	307662	NaN	NaN	12809.8	NaN	42791.2	P24288	Bcat1		42791.2
44127.4	O35855	Bcat2	Branched-chain-amino-acid aminotransferase, mitochondrial	BCAT2_MOUSE	15	14	16	17	16	16	15	14	15	15	16	16	15	16	15	15	13	16	16	15	447330	352362	884904	684867	736061	611797	799030	564897	746998	865457	948554	590005	748222	499506	961784	939238	669654	804633	1.09785e+06	810345	44127.4	O35855	Bcat2		44127.4
35942.1	Q9CWI3	Bccip	BRCA2 and CDKN1A-interacting protein	BCCIP_MOUSE	11	11	15	12	13	12	14	14	13	13	13	12	12	12	14	14	9	11	11	12	317466	266794	824781	386294	635564	586161	729548	528530	712595	799488	934761	521738	619421	440690	875160	870385	248809	317206	450160	378586	35942.1	Q9CWI3	Bccip		35942.1
32034.7	Q91YP1	Bcdin3d	BN3RNA 5'-monophosphate methyltransferase	BN3D2_MO	0	0	1	0	0	0	0	0	1	1	1	1	0	0	1	1	0	0	1	0	NaN	NaN	7886.16	NaN	NaN	NaN	NaN	NaN	5358.96	3159.079345703125	5794.62	4269.98	NaN	NaN	7461.39	5293.89	NaN	NaN	4736.02	NaN	32034.7	Q91YP1	Bcdin3d		32034.7
50370.7	P50136	Bckdha	2-oxoisovalerate dehydrogenase subunit alpha, mitochondrial	ODBA_MOUSE	7	7	11	9	9	9	9	9	10	9	9	8	10	7	8	9	6	8	9	7	83794.3	70135.3	272897	146726	152283	147133	180170	111010	177771	134037	225808	96163.4	146937	102886	184605	157446	129637	126552	175061	155059	50370.7	P50136	Bckdha		50370.7
42880.34;42880.34-2	Q6P3A8;Q6P3A8-2	Bckdhb	2-oxoisovalerate dehydrogenase subunit beta, mitochondrial;Isoform 2 of 2-oxoisovalerate dehydrogenase subunit beta, mitochondrial	ODBB_MOUSE	5	3	5	4	5	6	5	5	6	6	5	6	6	4	6	6	6	6	6	6	63594.8	42919.4	112352	68626.4	87490.1	85318.1	92994.9	87543	116661	129657	129310	83944.8	103162	67588.2	128330	134809	104696	111135	141116	110713	42880.3	Q6P3A8	Bckdhb		42880.3
46587.5	O55028	Bckdk	[3-methyl-2-oxobutanoate dehydrogenase [lipoamide]] kinase, mitochondrial	BCKD_MOUSE	6	6	7	6	6	6	6	6	6	6	6	6	6	6	6	6	5	6	6	6	58607.1	53354.6	123726	56302.1	117724	92822.3	138584	107832	94160.4	129877	144842	53662.4	106404	55311.6	140321	161004	72246.7	95374.3	126341	98399.2	46587.5	O55028	Bckdk		46587.5
25948.3	Q9Z0H7	Bcl10	B-cell lymphoma/leukemia 10	BCL10_MOUSE	10	11	13	13	11	12	12	10	12	11	12	11	11	11	12	11	12	11	12	12	267041	213602	594942	512016	406122	472350	568926	389615	508985	549021	597333	450320	442550	374411	597176	567509	433201	415349	604488	464231	25948.3	Q9Z0H7	Bcl10		25948.3
26823.54;21075.16	Q9QYE3-13;Q9QYE3-14	Bcl11a	Isoform 5 of B-cell lymphoma/leukemia 11A;Isoform 6 of B-cell lymphoma/leukemia 11A	BC11A_MOUSE	1	0	0	0	0	0	0	0	1	1	1	0	1	1	1	1	0	0	0	0	2703.06	NaN	NaN	NaN	NaN	NaN	NaN	NaN	6645.45	6249.23	6993.4	NaN	6717.06	2860.706787109375	8514.37	10060.8	NaN	NaN	NaN	NaN	26823.5	Q9QYE3-13	Bcl11a		26823.5
83855.5	Q9QYE3	Bcl11a	B-cell lymphoma/leukemia 11A	BC11A_MOUSE	15	9	20	19	15	14	15	16	15	17	17	14	18	13	14	16	12	17	17	15	194207	136383	459273	297191	395382	334583	410225	306219	471189	552757	607549	269562	476752	269328	518100	569223	335958	388375	481155	379381	83855.5	Q9QYE3	Bcl11a		83855.5
94565.68;94565.68-2;94565.68-3	Q99PV8;Q99PV8-2;Q99PV8-3	Bcl11b	B-cell lymphoma/leukemia 11B;Isoform 2 of B-cell lymphoma/leukemia 11B;Isoform 3 of B-cell lymphoma/leukemia 11B	BC11B_MOUSE	0	0	1	1	1	1	1	0	1	1	1	0	1	0	1	1	1	1	1	1	NaN	NaN	6955.58	4950.78	4640	1364.7	4825.39	NaN	8510.56	7972.61	8700.34	NaN	7173.35	NaN	8130.89	9592.78	4615.71	7627.74	8050.42	6263.43	94565.7	Q99PV8	Bcl11b		94565.7
26407.22;26407.22-2	P10417;P10417-2	Bcl2	Apoptosis regulator Bcl-2;Isoform Beta of Apoptosis regulator Bcl-2	BCL2_MOUSE	1	0	2	2	1	1	1	1	1	1	1	1	1	1	1	1	1	2	1	1	22179.6	NaN	58866	52836.5	48795.3	31913.7	45448.8	34862.3	38450.1	46807.4	48769.2	37242.1	30565.8	23038	51352.9	53863.7	18883.6	56802.6	72499.9	59602.1	26407.2	P10417	Bcl2		26407.2
19914	Q07440	Bcl2a1	B2Bcl-2-related protein A1	B2LA1_MOU	3	3	4	4	3	3	3	3	3	4	4	4	4	4	4	4	0	0	0	0	44024.1	41748.9	140480	149670	68854.9	79152.4	78083.2	59358.9	147505	193535	182867	184588	117838	102577	205825	182932	NaN	NaN	NaN	NaN	19914	Q07440	Bcl2a1		19914
26132.01;26132.01-3;26132.01-4	Q64373;Q64373-3;Q64373-4	Bcl2l1	B2Bcl-2-like protein 1;B2Isoform Bcl-X(beta) of Bcl-2-like protein 1;B2Isoform Bcl-X(delta-TM) of Bcl-2-like protein 1	B2CL1_MOU	5	6	4	5	6	6	6	6	7	7	6	6	6	5	6	5	1	0	0	2	107507	80550.7	236856	311566	137348	141080	155434	127749	214160	232176	249068	232783	163244	73692.3	214586	198877	29030.7	NaN	NaN	32287.1	26132	Q64373	Bcl2l1		26132
22066.6	O54918	Bcl2l11	B2Bcl-2-like protein 11	B2L11_MOU	3	0	5	5	4	4	4	3	3	3	2	3	3	2	3	3	1	3	3	3	9870.8	NaN	42572.9	56698.6	29954.1	26417.1	29588.6	20548.2	12370.5	14193.7	7622.39	26587.4	16818.3	6211.7	21353.8	20666.5	3211.312744140625	15023	19190.5	17202.2	22066.6	O54918	Bcl2l11		22066.6
46719.4	P59017	Bcl2l13	B2Bcl-2-like protein 13	B2L13_MOU	9	9	12	11	10	11	9	10	9	9	10	9	11	11	11	10	8	10	11	12	152344	126259	426062	377155	215105	250184	243234	204689	257694	306085	328458	240682	283394	211398	349617	319336	289816	324738	384200	268226	46719.4	P59017	Bcl2l13		46719.4
47216	Q9Z2F6	Bcl3	B-cell lymphoma 3 protein homolog	BCL3_MOUSE	0	0	6	9	7	5	6	6	6	9	6	4	8	5	6	6	2	6	4	0	NaN	NaN	84068.1	90376.7	77146.7	58580.5	91053.6	70873.5	87332.4	127663	81875.2	53782.3	72992	31455.5	107027	85469.7	16037	26838	31430.8	NaN	47216	Q9Z2F6	Bcl3		47216
78981.7	P41183	Bcl6	B-cell lymphoma 6 protein homolog	BCL6_MOUSE	1	2	3	3	3	2	3	2	1	3	0	4	1	2	0	0	3	5	6	5	5170.89	7662.85	31271.4	42386.5	15877.2	16741.5	20259.6	19688.7	9610.44	29252.8	NaN	27937.3	10089.2	6379.2	NaN	NaN	38916.5	35461	55774.2	46838.6	78981.7	P41183	Bcl6		78981.7
22780.8	Q9CXE2	Bcl7a	B-cell CLL/lymphoma 7 protein family member A	BCL7A_MOUSE	0	1	2	1	0	2	0	2	1	2	0	1	2	1	0	0	2	3	3	3	NaN	29909.2	85224.1	51854.7	NaN	56441.2	NaN	47868.9	84763	97198.3	NaN	58569.8	65835.9	48681.4	NaN	NaN	152024	141397	174763	135328	22780.8	Q9CXE2	Bcl7a		22780.8
22238.3	Q921K9	Bcl7b	B-cell CLL/lymphoma 7 protein family member B	BCL7B_MOUSE	6	5	7	7	6	6	6	7	6	6	6	6	6	5	5	5	4	6	5	6	289384	231248	536201	421042	437159	358222	419309	330199	467779	518480	611686	479630	387322	167822	536680	510948	511741	551179	721451	595785	22238.3	Q921K9	Bcl7b		22238.3
23445	O08664	Bcl7c	B-cell CLL/lymphoma 7 protein family member C	BCL7C_MOUSE	4	3	4	2	3	3	3	3	3	3	3	3	3	3	3	3	2	2	3	2	94644.7	64365.4	186467	92607	143830	126859	159857	130499	158306	163898	178459	107840	112361	88431	176133	168569	128691	100539	166006	115002	23445	O08664	Bcl7c		23445
148971	Q9D219	Bcl9	B-cell CLL/lymphoma 9 protein	BCL9_MOUSE	0	0	4	0	0	0	4	3	0	6	3	5	4	0	4	3	0	4	0	0	NaN	NaN	32979.2	NaN	NaN	NaN	19616.3	11252.2	NaN	33224.3	14902.2	19033.2	125650	NaN	168395	24006.9	NaN	20893	NaN	NaN	148971	Q9D219	Bcl9		148971
156679.75;156679.75-2	Q67FY2;Q67FY2-2	Bcl9l	B-cell CLL/lymphoma 9-like protein;Isoform 2 of B-cell CLL/lymphoma 9-like protein	BCL9L_MOUSE	5	0	7	5	6	6	8	8	3	5	6	3	7	4	10	4	3	6	4	4	32788.8	NaN	80720.8	34579.8	105417	82166.1	109767	95220.7	29331	53213.6	57163.5	30920.2	61955.9	46955.1	94692.2	67186.6	35230.9	45286.2	18150.3	43920.3	156680	Q67FY2	Bcl9l		156680
106002.19;106002.19-2	Q8K019;Q8K019-2	Bclaf1	Bcl-2-associated transcription factor 1;Isoform 2 of Bcl-2-associated transcription factor 1	BCLF1_MOUSE	25	26	30	31	27	26	30	25	28	28	29	24	24	25	28	27	22	25	28	25	1.44181e+06	1.31219e+06	2901643	2.15421e+06	1.95198e+06	1748523	2.08097e+06	1.75265e+06	2401496	2.62539e+06	2.88133e+06	1.63422e+06	1.86937e+06	1.36994e+06	2.39643e+06	2.6461e+06	1705395	1.68509e+06	2111413	1820960	106002	Q8K019	Bclaf1		106002
90111.47;90111.47-2	A2AG58;A2AG58-2	Bclaf3	BCLAF1 and THRAP3 family member 3;Isoform 2 of BCLAF1 and THRAP3 family member 3	BCLA3_MOUSE	5	4	8	6	8	6	9	6	8	8	8	9	9	5	8	8	2	4	3	5	55678.6	29322.5	137892	108387	105249	86440.9	86533.9	42527.4	114880	138800	159349	116570	111184	74903.8	162521	151413	29892.2	24264.2	40035.7	62639.2	90111.5	A2AG58	Bclaf3		90111.5
192630.82;192630.82-2	Q8CGN4;Q8CGN4-2	Bcor	BCL-6 corepressor;Isoform 2 of BCL-6 corepressor	BCOR_MOUSE	12	9	11	12	18	19	16	18	16	18	16	15	20	12	19	19	10	17	15	17	54025.8	44919.2	109675	75300.5	137741	176968	133407	128416	143475	160918	213678	111711	150641	104769	206988	220485	67337.6	106844	118361	124363	192631	Q8CGN4	Bcor		192631
190487	A2AQH4	Bcorl1	BCL-6 corepressor-like protein 1	BCORL_MOUSE	0	1	0	0	0	1	0	0	0	0	0	0	0	0	0	0	0	0	0	0	NaN	17212.3	NaN	NaN	NaN	38162.5	NaN	NaN	NaN	NaN	NaN	NaN	NaN	NaN	NaN	NaN	NaN	NaN	NaN	NaN	190487	A2AQH4	Bcorl1		190487
143072	Q6PAJ1	Bcr	Breakpoint cluster region protein	BCR_MOUSE	0	0	0	0	5	2	0	5	3	5	6	0	0	0	2	5	0	3	7	5	NaN	NaN	NaN	NaN	41708.5	15333.5	NaN	39233.4	22364.9	42086.8	122147	NaN	NaN	NaN	6103.57	45570.9	NaN	21761.7	40228.6	27642.2	143072	Q6PAJ1	Bcr		143072
47406.2	Q9CZP5	Bcs1l	Mitochondrial chaperone BCS1	BCS1_MOUSE	10	8	11	10	12	10	11	13	13	11	13	12	11	0	12	13	4	12	13	11	99656.6	63966	214868	139990	176952	91000.9	181459	192677	157926	188144	216769	146267	152163	NaN	209494	254635	60709.6	161683	265790	169838	47406.2	Q9CZP5	Bcs1l		47406.2
38299	Q80XN0	Bdh1	D-beta-hydroxybutyrate dehydrogenase, mitochondrial	BDH_MOUSE	10	9	13	12	11	11	11	11	11	11	11	10	11	11	11	11	9	10	12	8	162643	125862	440892	183122	290522	240195	295467	232142	351178	395419	435430	172581	318205	192287	395785	425729	130570	259580	336482	191944	38299	Q80XN0	Bdh1		38299
270789.67;270789.67-2	Q571C7;Q571C7-2	Bdp1	Transcription factor TFIIIB component B'' homolog;Isoform 2 of Transcription factor TFIIIB component B'' homolog	BDP1_MOUSE	11	8	16	17	19	18	19	15	19	19	20	20	22	15	18	16	7	14	13	12	38733.6	25040.4	87616	102297	106242	90462.6	119116	71923.9	126282	146130	189062	113866	105374	73478.4	109259	109423	41229.2	53681.6	71997.4	58682.8	270790	Q571C7	Bdp1		270790
51588.9	O88597	Becn1	Beclin-1	BECN1_MOUSE	11	11	16	16	12	13	15	11	12	14	15	16	16	13	15	14	13	15	14	14	170594	100205	426321	353654	288868	252603	406552	226564	316204	402572	454919	363942	366510	248613	465858	431953	331963	401310	480443	414580	51588.9	O88597	Becn1		51588.9
94155.3	Q6PAL0	Bend3	BEN domain-containing protein 3	BEND3_MOUSE	9	10	17	11	12	10	14	11	14	14	16	13	19	11	13	12	0	0	4	6	58646.3	38982.6	156212	75771.7	99971	58803.4	123904	66049.2	140147	169328	252711	92011.2	189657	66821.2	177303	148501	NaN	NaN	27478.3	34532.9	94155.3	Q6PAL0	Bend3		94155.3
29229.4	Q8C6D4-2	Bend5	Isoform 2 of BEN domain-containing protein 5	BEND5_MOUSE	6	0	7	7	8	5	9	7	5	6	5	9	9	6	6	9	8	10	9	9	30573.5	NaN	86407.5	80789.8	81517.6	48737.7	76612.5	51261.3	41483	68106	53237.4	80575	83842.5	49140	76840.1	121333	126032	114374	151270	134223	29229.4	Q8C6D4-2	Bend5		29229.4
13274.3	O35623	Bet1	BET1 homolog	BET1_MOUSE	0	1	1	1	1	1	1	1	1	1	1	1	1	0	1	1	1	1	1	1	NaN	25794.6	36253.8	34195	41974.6	34781.6	39324.8	31916.5	31251.8	47105.6	53344	25116.7	34331	NaN	53987.6	47286.3	22183.8	33430.5	34798.8	33511.9	13274.3	O35623	Bet1		13274.3
12428.2	O35153	Bet1l	BET1-like protein	BET1L_MOUSE	3	3	2	4	3	4	3	3	4	4	4	4	3	2	4	3	3	4	3	4	36734.3	27191.4	57842.3	67375.7	49768	65065.5	66499.8	53949	68924.2	91800.2	91282.4	77213.6	66370.7	33084.6	103010	83960	52304	56710.3	62110	47884.8	12428.2	O35153	Bet1l		12428.2
52968.2	Q8R079	Bfar	Bifunctional apoptosis regulator	BFAR_MOUSE	2	0	3	3	3	3	3	0	2	2	3	0	2	0	2	2	1	3	3	2	9858.33	NaN	25745.7	21430.7	21424.5	20416.7	16879.2	NaN	15426.3	17747.3	21677.3	NaN	10680.1	NaN	18466.5	19600.9	11901	14852.9	21114.6	13903.9	52968.2	Q8R079	Bfar		52968.2
93390.83;93390.83-2	Q921C5;Q921C5-2	Bicd2	Protein bicaudal D homolog 2;Isoform 2 of Protein bicaudal D homolog 2	BICD2_MOUSE	21	14	24	18	25	23	23	24	26	26	26	21	25	20	25	26	13	14	18	15	214854	107596	452197	167054	418284	379870	494380	384758	557079	579414	678127	212898	460349	274927	608450	643368	109889	103068	221504	177335	93390.8	Q921C5	Bicd2		93390.8
161354	F8VPZ9	Bicra	BRD4-interacting chromatin-remodeling complex-associated protein	BICRA_MOUSE	10	6	14	12	12	10	13	11	12	11	12	7	14	8	10	9	10	14	14	13	81493.1	34190.5	174765	110822	191417	108194	189481	105406	140557	162128	212261	82045.6	161606	74313.8	153933	181076	151368	206754	328671	232560	161354	F8VPZ9	Bicra		161354
114350	Q8CHH5	Bicral	BRD4-interacting chromatin-remodeling complex-associated protein-like	BICRL_MOUSE	3	3	9	9	6	7	8	8	6	6	8	3	5	6	7	7	3	9	11	7	25592.1	29359.1	101953	96396.1	80059.4	85586.9	103424	72479.9	79391.6	78297.6	78934.7	32752.7	46273.8	63122.7	104956	98623.1	57890.9	142014	182400	129701	114350	Q8CHH5	Bicral		114350
21951.6	P70444	Bid	BH3-interacting domain death agonist	BID_MOUSE	2	0	0	0	3	4	4	4	5	3	5	2	5	4	6	5	2	0	2	4	13233.3	NaN	NaN	NaN	34465.4	65520.9	63972.5	59982.5	108601	89987.1	106193	51261.9	125649	62801.9	219612	185015	32622.1	NaN	22288.2	35265.3	21951.6	P70444	Bid		21951.6
48013.6	O08539-2	Bin1	Isoform 2 of Myc box-dependent-interacting protein 1	BIN1_MOUSE	21	20	21	22	22	22	22	22	21	22	23	21	20	23	23	22	19	22	22	23	1.35787e+06	1060987	2.70319e+06	1.86347e+06	2.8851e+06	2.58818e+06	3.26664e+06	2.44135e+06	2.32225e+06	2.50981e+06	2.96406e+06	2495061	2.05455e+06	2.06986e+06	3389200	3.3001e+06	2.29174e+06	2.88045e+06	4.02976e+06	3.22856e+06	48013.6	O08539-2	Bin1		48013.6
52554	D3Z6Q9	Bin2	Bridging integrator 2	BIN2_MOUSE	12	12	14	14	14	15	14	15	13	13	14	13	15	14	16	15	15	15	15	14	502270	426329	1.19163e+06	809585	996756	864330	1.15576e+06	971292	916429	938742	1.06573e+06	856481	1.0293e+06	715731	1.1716e+06	1.10006e+06	1.10894e+06	1.13658e+06	1.54345e+06	1147812	52554	D3Z6Q9	Bin2		52554
29650.8	Q9JI08	Bin3	Bridging integrator 3	BIN3_MOUSE	1	0	0	0	1	0	2	2	2	3	3	0	3	1	2	3	0	1	1	1	10912.7	NaN	NaN	NaN	12361.3	NaN	20653	18065.4	30193	28718.8	34306.5	NaN	30051.9	12853.9	24870	43884.3	NaN	5873.6	15878	10546	29650.8	Q9JI08	Bin3		29650.8
69676.4	Q62210	Birc2	Baculoviral IAP repeat-containing protein 2	BIRC2_MOUSE	10	6	11	10	8	10	12	11	12	14	10	9	12	11	13	12	9	9	10	11	77483.3	38484.6	152083	111743	88757.6	117454	162082	116704	178406	191251	167794	95430.2	171317	109369	224380	232321	91079.4	89697.4	152849	128004	69676.4	Q62210	Birc2		69676.4
67228.4	O08863	Birc3	Baculoviral IAP repeat-containing protein 3	BIRC3_MOUSE	1	3	8	0	8	7	6	6	6	6	7	0	7	5	8	8	0	4	0	0	23213.5	14407.2	141177	NaN	191709	164113	139975	140593	130320	205389	213934	NaN	147832	112188	171874	237510	NaN	126804	NaN	NaN	67228.4	O08863	Birc3		67228.4
532170.13;532170.13-2;532170.13-3	O88738;O88738-2;O88738-3	Birc6	Baculoviral IAP repeat-containing protein 6;Isoform 2 of Baculoviral IAP repeat-containing protein 6;Isoform 3 of Baculoviral IAP repeat-containing protein 6	BIRC6_MOUSE	57	38	71	39	73	78	76	43	82	84	83	52	89	73	85	63	28	52	60	33	555330	305157	1.27988e+06	369989	1.11693e+06	1.09981e+06	1.37132e+06	487189	1.63829e+06	1876227	2.22789e+06	592775	1.57867e+06	956056	2253931	1085631	272084	553706	820058	293750	532170	O88738	Birc6		532170
31845.5	Q8VD62	Bles03	UPF0696 protein C11orf68 homolog	CK068_MOUSE	15	13	15	14	15	14	14	15	14	14	13	13	16	13	14	14	14	15	16	13	318359	279558	553953	420220	508189	450334	565802	572221	635987	631325	533736	427446	618539	334807	575653	738078	697745	643944	902360	693002	31845.5	Q8VD62	Bles03		31845.5
56674.2	P16277	Blk	Tyrosine-protein kinase Blk	BLK_MOUSE	12	9	13	12	12	13	12	10	12	12	12	13	14	10	11	13	11	14	13	13	138558	92797.9	303176	234743	263505	258616	272640	175469	274148	271216	340327	253232	287206	175915	375173	344958	327088	459663	603305	485428	56674.2	P16277	Blk		56674.2
158366	O88700	Blm	RecQ-like DNA helicase BLM	BLM_MOUSE	12	6	18	13	13	12	13	14	23	22	21	15	21	16	15	18	1	2	3	5	60714.3	26524.7	158254	102656	106588	116639	125397	89365.9	267676	256922	308073	141275	233315	107463	207478	243936	6155.05	9264.41	18705.8	38413.1	158366	O88700	Blm		158366
52511.1	Q8R016	Blmh	Bleomycin hydrolase	BLMH_MOUSE	18	16	20	17	20	20	20	20	18	19	20	18	20	19	21	20	15	17	18	17	423715	276616	1.01662e+06	481019	763149	697063	924604	696919	812136	924427	1.00448e+06	560119	980112	636527	1.12356e+06	1067277	596536	612251	1.02875e+06	701470	52511.1	Q8R016	Blmh		52511.1
50670.7	Q9QUN3	Blnk	B-cell linker protein	BLNK_MOUSE	7	8	13	13	10	12	12	9	10	12	13	12	14	11	11	12	10	11	12	11	359928	323587	973021	922823	718887	720818	866126	644961	966588	993760	1.10441e+06	1.06968e+06	1.05847e+06	758175	1.08171e+06	1175115	699088	886305	1.24312e+06	930331	50670.7	Q9QUN3	Blnk		50670.7
14281.3	O55102	Bloc1s1	BL1Biogenesis of lysosome-related organelles complex 1 subunit 1	BL1S1_MO	4	4	4	4	4	4	4	4	5	4	5	4	5	4	4	4	4	5	5	4	51533.3	29177.4	102583	70278.3	83317.2	65328.5	91309.7	54550.2	91874.4	100593	100642	74701.2	96604.2	70947.7	111489	101248	86020.9	87036.9	124662	108358	14281.3	O55102	Bloc1s1		14281.3
16299.5	Q9CWG9	Bloc1s2	BL1Biogenesis of lysosome-related organelles complex 1 subunit 2	BL1S2_MO	6	5	4	5	4	5	4	0	4	6	6	5	6	6	6	5	4	4	4	6	73097.1	51030.5	110958	75840.8	72263.4	114601	120393	NaN	122858	136758	121355	77736.7	150295	102472	148235	111821	121076	117463	109659	122981	16299.5	Q9CWG9	Bloc1s2		16299.5
20397.8	Q5U5M8	Bloc1s3	BL1Biogenesis of lysosome-related organelles complex 1 subunit 3	BL1S3_MO	0	0	0	0	0	0	0	0	2	0	1	1	0	0	1	0	0	0	0	0	NaN	NaN	NaN	NaN	NaN	NaN	NaN	NaN	58548.5	NaN	6694.59	5126.54	NaN	NaN	7048.01	NaN	NaN	NaN	NaN	NaN	20397.8	Q5U5M8	Bloc1s3		20397.8
23111.9	Q8VED2	Bloc1s4	BL1Biogenesis of lysosome-related organelles complex 1 subunit 4	BL1S4_MO	1	0	4	2	2	3	3	3	4	4	4	5	5	3	5	4	0	2	3	3	11264.1	NaN	46664.2	21791.7	20322.8	35000.9	30053.8	40969.9	52456.7	61086.3	53734.1	47979.2	59672.6	27729.7	80506.3	61071.1	NaN	18523.5	43748.4	21150.3	23111.9	Q8VED2	Bloc1s4		23111.9
21283.1	Q8R015	Bloc1s5	BL1Biogenesis of lysosome-related organelles complex 1 subunit 5	BL1S5_MO	5	5	7	7	7	7	7	7	6	7	7	7	7	5	6	7	6	7	7	7	66126.3	39948.7	146255	101501	107671	107546	107603	116275	86962.3	106538	167739	93770.4	102658	42462.5	139578	131063	82836.6	77301.4	134656	98980.7	21283.1	Q8R015	Bloc1s5		21283.1
19682.4	Q9R0C0	Bloc1s6	BL1Biogenesis of lysosome-related organelles complex 1 subunit 6	BL1S6_MO	0	0	2	1	1	3	3	2	3	3	3	3	2	1	3	2	2	3	3	3	NaN	NaN	13044.1	3462.12	5687.89	21575.8	23385.8	10289.2	22890.1	24984.4	27220.7	26489.8	26122.3	6116.02	28022.3	19576.7	7355.52	15075.2	24583.5	17196.3	19682.4	Q9R0C0	Bloc1s6		19682.4
254469	Q5SYL3	Bltp2	Bridge-like lipid transfer protein family member 2	BLTP2_MOUSE	2	0	6	9	9	6	9	0	7	9	7	0	6	4	5	9	5	10	7	10	14218.8	NaN	84570.4	83969.4	85222.4	52059.2	97187.8	NaN	69145.1	112930	80237.3	NaN	42991.4	39083.8	49064.3	139357	35001.4	89857.9	84303.6	92205.1	254469	Q5SYL3	Bltp2		254469
161940	A2RSJ4	Bltp3b	Bridge-like lipid transfer protein family member 3B	BLT3B_MOUSE	8	9	13	9	15	15	14	14	15	13	15	16	12	13	17	15	10	16	16	16	42860.4	68085.5	116134	62760.2	123295	110103	115922	103127	125179	135956	154746	136203	93731.9	77046.1	192110	162303	96161.1	140039	175256	157209	161940	A2RSJ4	Bltp3b		161940
33524.5	Q9CY64	Blvra	Biliverdin reductase A	BIEA_MOUSE	14	13	14	13	13	13	14	13	13	14	14	14	14	14	14	14	12	14	14	14	448094	330412	884776	543735	808270	689049	986796	645593	912917	978376	1.09119e+06	772670	846311	615403	1.19716e+06	1.14199e+06	758607	775780	1.22005e+06	953543	33524.5	Q9CY64	Blvra		33524.5
22197.3	Q923D2	Blvrb	Flavin reductase (NADPH)	BLVRB_MOUSE	10	9	11	11	10	11	11	10	10	10	11	10	11	10	10	11	9	10	11	11	789120	593823	1.77148e+06	1252156	1.50328e+06	1.43768e+06	1.81067e+06	1.39625e+06	1.43905e+06	1.56789e+06	1.75678e+06	1651855	1.43044e+06	1.1247e+06	1962589	1.88594e+06	2488690	2.0443e+06	3.19273e+06	2.62683e+06	22197.3	Q923D2	Blvrb		22197.3
45540.74;45540.74-2	Q8R2X8;Q8R2X8-2	Blzf1	Golgin-45;Isoform 2 of Golgin-45	GO45_MOUSE	0	0	4	4	0	0	0	1	3	3	4	3	4	3	0	3	0	0	0	0	NaN	NaN	27467.6	26072.9	NaN	NaN	NaN	2358.98	19777.7	23555.5	33362.9	12721.2	22281.7	15212.8	NaN	18695.4	NaN	NaN	NaN	NaN	45540.7	Q8R2X8	Blzf1		45540.7
36707.8	P25916	Bmi1	Polycomb complex protein BMI-1	BMI1_MOUSE	4	3	4	4	4	5	3	3	5	5	4	5	5	4	5	4	4	4	4	4	80386.4	52623.1	177769	94408.1	130113	87168.4	92119.9	82257.1	141840	163955	194819	80485.8	121400	71696.4	155978	159796	109609	109616	136572	145373	36707.8	P25916	Bmi1		36707.8
126185	Q91Z96	Bmp2k	BMP-2-inducible protein kinase	BMP2K_MOUSE	10	6	8	8	13	12	12	9	12	12	14	10	12	11	12	11	10	13	12	10	75639.1	38013.5	119731	85626.3	148493	136555	172234	117475	127119	160982	199321	100602	154508	119179	203808	201684	121073	142877	185965	153227	126185	Q91Z96	Bmp2k		126185
145413.79;145730.11	Q6PGF5;Q6ZQH0	Bms1	Q6BMS1 homolog, ribosome assembly protein (Yeast);Q6MKIAA0187 protein (Fragment)	Q6PGF5_MOU;Q6ZQH0_MOU	33	29	34	31	32	34	31	31	36	34	36	32	34	31	32	32	16	23	26	27	888404	691173	1.97299e+06	1.36844e+06	1.26787e+06	1.18776e+06	1.3554e+06	1.02611e+06	1.7304e+06	1.92213e+06	2155122	1.42123e+06	1.37346e+06	1.00536e+06	1.87708e+06	1.8114e+06	454505	679307	928879	754900	145414	Q6PGF5	Bms1		145414
45952.5	Q8BXK4	Bmt2	S-adenosylmethionine sensor upstream of mTORC1	SAMTR_MOUSE	2	1	2	2	2	2	3	1	2	2	1	2	2	1	1	0	0	1	0	2	14786.9	6355.63	34640.6	24534	20853.6	23187.7	27810.5	9386.85	18834.4	22918.4	18074.5	32993	16879.5	8426.27	16208.2	NaN	NaN	8324.41	NaN	14766.3	45952.5	Q8BXK4	Bmt2		45952.5
26175.3	Q6QD59	Bnip1	Vesicle transport protein SEC20	SEC20_MOUSE	11	10	11	12	11	10	10	11	11	11	11	11	11	10	11	11	11	11	11	11	309400	237936	586541	649567	495813	404100	479459	388072	486852	543650	594725	546035	456489	323514	622187	639138	424452	524621	617900	504033	26175.3	Q6QD59	Bnip1		26175.3
37768.8	O54940	Bnip2	BCL2/adenovirus E1B 19 kDa protein-interacting protein 2	BNIP2_MOUSE	3	1	4	4	4	5	3	4	3	3	3	4	3	4	4	4	0	3	4	4	38512.5	3984.33	56682.1	52053.8	52873.6	71570.7	44233.2	41922.4	55313.1	49904.1	53922.9	66060.7	41466.1	53817.8	73625.7	73824.4	NaN	32513.5	47197.3	74320.1	37768.8	O54940	Bnip2		37768.8
23766.3	Q9Z2F7	Bnip3l	BCL2/adenovirus E1B 19 kDa protein-interacting protein 3-like	BNI3L_MOUSE	2	2	2	2	2	2	2	0	2	2	2	2	2	0	2	2	2	2	2	2	22021.8	27987.8	41307	57991.9	23715.5	29225.9	28090.1	NaN	30853.3	30999.1	26599.6	37119.4	26291.2	NaN	33110.3	27723.8	47593	77976.8	87833.9	69541.6	23766.3	Q9Z2F7	Bnip3l		23766.3
327452.94;327452.94-3	E9Q6J5;E9Q6J5-3	Bod1l	BD1Biorientation of chromosomes in cell division protein 1-like 1;BD1Isoform 3 of Biorientation of chromosomes in cell division protein 1-like 1	BD1L1_MO	33	31	41	34	42	38	40	34	42	44	37	35	41	33	40	40	31	40	41	42	367845	306128	766363	440509	662799	543567	755261	498881	742041	828775	829304	427625	604978	438528	798370	778292	663832	669702	910345	764170	327453	E9Q6J5	Bod1l		327453
14379.4	Q9D8S9	Bola1	BolA-like protein 1	BOLA1_MOUSE	3	2	4	3	3	4	5	4	4	4	4	5	5	5	4	4	3	5	5	4	26781.8	12888	66341	24895.7	52761.1	44659.8	70071.5	57904.2	75964.5	76178.1	77484	52382.8	81645.2	62140.1	94761.6	87349.7	44352	63046.5	88120.3	63019.8	14379.4	Q9D8S9	Bola1		14379.4
10214.6	Q8BGS2	Bola2	BolA-like protein 2	BOLA2_MOUSE	5	2	5	5	5	5	5	6	6	6	5	5	6	5	6	6	2	2	5	3	37338.8	13472.5	88044.1	64065	78647.1	68798.5	92406	113738	176223	183168	155059	107241	121405	63308.6	301067	311011	12131.5	16581.6	46516.1	21292.4	10214.6	Q8BGS2	Bola2		10214.6
82545.6	P97452	Bop1	Ribosome biogenesis protein BOP1	BOP1_MOUSE	25	22	31	29	27	28	29	27	26	29	28	27	27	25	28	27	18	21	20	20	1.37472e+06	1.03363e+06	2.87407e+06	1.99941e+06	1.99938e+06	1857052	2.3548e+06	1.61524e+06	2.78015e+06	3061317	3.57577e+06	1.94944e+06	2.15179e+06	1.54064e+06	2.90153e+06	2.83808e+06	748840	806444	1.09732e+06	841706	82545.6	P97452	Bop1		82545.6
57037.7	Q8BS90	Bora	Protein aurora borealis	BORA_MOUSE	0	0	1	3	1	1	2	1	7	2	7	4	4	2	5	0	0	0	0	0	NaN	NaN	7524.77	17082.2	2511.078369140625	5336.92	14053.1	12216.1	41126.8	6772.93	57039	23830.3	14995	9960.09	37873.9	NaN	NaN	NaN	NaN	NaN	57037.7	Q8BS90	Bora		57037.7
22120.3	Q9D920	Borcs5	BLOC-1-related complex subunit 5	BORC5_MOUSE	6	6	9	8	8	8	8	7	8	8	9	7	9	7	8	8	7	8	9	8	68286.9	58286.9	174572	114394	145945	129785	174612	124372	156899	181257	215588	112044	158840	88444.7	203734	189356	174354	147911	268712	217251	22120.3	Q9D920	Borcs5		22120.3
38011.2	Q9D6W8	Borcs6	BLOC-1-related complex subunit 6	BORC6_MOUSE	7	0	8	8	6	7	8	3	6	6	6	6	5	4	9	7	5	8	8	5	34881.2	NaN	119966	106641	56548.9	59918.9	92767.2	22140.4	59705.8	72479.2	85335.1	63931.1	58105.1	21712.3	120357	98669.5	50477.7	85745.9	93300.8	52162.1	38011.2	Q9D6W8	Borcs6		38011.2
29978.2	P15327	Bpgm	Bisphosphoglycerate mutase	PMGE_MOUSE	0	0	0	0	1	2	0	0	0	1	0	0	0	0	0	0	2	0	3	3	NaN	NaN	NaN	NaN	1023.427978515625	5078.59	NaN	NaN	NaN	5337.04	NaN	NaN	NaN	NaN	NaN	NaN	11434.9	NaN	10062.9	6646.98	29978.2	P15327	Bpgm		29978.2
32850.9	Q8R164	Bphl	Valacyclovir hydrolase	BPHL_MOUSE	8	8	10	11	10	9	10	9	12	12	10	10	9	9	11	11	9	11	12	11	154652	114926	355896	337241	292853	215993	282201	197606	276656	312012	316939	276845	231220	158349	368474	331147	319800	459101	611710	512761	32850.9	Q8R164	Bphl		32850.9
33196	Q9Z0S1	Bpnt1	3'(2'),5'-bisphosphate nucleotidase 1	BPNT1_MOUSE	13	12	17	15	14	15	15	14	15	14	16	16	16	16	15	13	13	15	15	16	248910	227712	736618	578029	436594	462660	623086	417863	610919	633712	809498	762616	563369	472296	749382	594165	439349	357322	632725	493246	33196	Q9Z0S1	Bpnt1		33196
38616.3	Q80V26	Bpnt2	Golgi-resident adenosine 3',5'-bisphosphate 3'-phosphatase	IMPA3_MOUSE	3	2	3	2	4	5	4	3	3	3	5	4	3	3	4	4	1	3	2	4	29919.4	22077.6	44481.2	29992.1	66322.1	77124.1	71027.5	55686.8	74801.3	90618.4	108830	71148.3	58727.7	41027.6	89118	98134.4	16278.8	49991.3	40183.4	56677.3	38616.3	Q80V26	Bpnt2		38616.3
37623	A0A140LHY5	Bptf	A0A140Bromodomain PHD finger transcription factor (Fragment)	A0A140LHY5	0	2	1	1	2	2	1	1	2	2	2	2	2	1	1	1	2	2	2	2	NaN	4950.24	7703.49	5498.42	8378.8	7634.68	4663.59	5800.22	12370.4	9030.39	13247.7	3878.672119140625	8659.13	4748.9	8413.2	6964.31	13671.6	8285.39	10482.2	7685.23	37623	A0A140LHY5	Bptf		37623
321598	E9Q6A7	Bptf	E9Q6Bromodomain PHD finger transcription factor	E9Q6A7_M	49	47	62	51	57	53	53	48	56	57	57	54	61	42	56	53	50	56	52	56	605486	517017	1.43217e+06	996218	1.10389e+06	918276	1.09815e+06	766756	1.12132e+06	1.30299e+06	1.46723e+06	958726	989360	655429	1.36842e+06	1.2432e+06	1.03699e+06	1186605	1.37189e+06	1.23303e+06	321598	E9Q6A7	Bptf		321598
82514.5	P28028	Braf	Serine/threonine-protein kinase B-raf	BRAF_MOUSE	3	0	3	4	4	5	5	4	5	5	4	3	5	2	5	5	2	3	3	3	55413.2	NaN	90231.3	51314.6	76009.8	91512	95259.4	89059.2	94247.5	89312.5	117789	48651.8	78258.2	52552.9	124950	101496	47310.4	56944.4	56590.7	60275.7	82514.5	P28028	Braf		82514.5
66991.14;66991.14-2	Q99MP8;Q99MP8-2	Brap	BRCA1-associated protein;Isoform 2 of BRCA1-associated protein	BRAP_MOUSE	10	4	12	11	9	13	13	11	13	13	12	9	10	11	14	12	7	11	10	9	79057.9	27181	157038	99865.2	130632	137286	177033	133478	167521	191059	227122	116034	135021	116946	228652	199508	70622.3	102789	137201	113561	66991.1	Q99MP8	Brap		66991.1
89085.6	Q8C3R1	Brat1	BRCA1-associated ATM activator 1	BRAT1_MOUSE	13	11	16	15	16	17	15	14	14	17	17	17	18	16	17	15	9	13	14	11	99257.2	72763.9	259534	244924	240586	236628	272039	151825	215095	295279	339479	254614	251124	182023	337736	302501	123867	128577	169191	93680.5	89085.6	Q8C3R1	Brat1		89085.6
198795	P48754	Brca1	Breast cancer type 1 susceptibility protein homolog	BRCA1_MOUSE	0	0	6	0	8	5	10	9	13	11	11	0	11	6	13	10	0	0	0	0	NaN	NaN	39182.6	NaN	51133.5	28250.8	55986.6	58979.1	113415	103909	123531	NaN	78027.5	28124.9	137174	116142	NaN	NaN	NaN	NaN	198795	P48754	Brca1		198795
33340.1	P46737	Brcc3	Lys-63-specific deubiquitinase BRCC36	BRCC3_MOUSE	8	9	10	10	10	10	10	11	9	12	12	9	12	11	10	11	9	11	11	9	132479	117554	329018	211440	265181	250781	332910	237756	319998	359060	369590	231682	309419	203838	395661	380041	274827	281638	399477	305298	33340.1	P46737	Brcc3		33340.1
133373	G5E8P1-2	Brd1	Isoform 2 of Bromodomain-containing protein 1	BRD1_MOUSE	15	11	20	9	21	17	14	14	17	17	16	5	16	13	18	17	14	19	20	18	166646	79014.2	348781	80350.7	337987	218793	221240	190081	260923	216506	333745	27394.1	261304	112266	383418	225149	238210	338123	431412	319808	133373	G5E8P1-2	Brd1		133373
88066.9	Q7JJ13	Brd2	Bromodomain-containing protein 2	BRD2_MOUSE	18	19	25	21	23	23	23	22	20	21	23	19	23	20	21	21	22	23	23	23	387959	326933	932716	538666	782789	666055	847907	646004	801712	821316	1.03663e+06	570786	699317	541544	953959	911954	909516	894846	1.20619e+06	980011	88066.9	Q7JJ13	Brd2		88066.9
79761.7	Q8K2F0	Brd3	Bromodomain-containing protein 3	BRD3_MOUSE	12	10	13	12	14	13	13	14	13	14	13	12	13	11	13	12	12	13	14	14	197187	131582	411871	191963	351800	310940	366756	284805	391346	393356	453938	221758	320317	198132	445894	425796	398120	426539	559950	435179	79761.7	Q8K2F0	Brd3		79761.7
155895	Q9ESU6	Brd4	Bromodomain-containing protein 4	BRD4_MOUSE	28	30	31	29	32	30	31	30	31	32	31	32	31	27	31	30	28	33	31	32	815707	637005	1.75191e+06	1.24735e+06	1.34434e+06	1139832	1.47601e+06	1.0531e+06	1.45397e+06	1599647	1.77864e+06	1.2348e+06	1.34442e+06	921548	1.55993e+06	1627722	1634746	1.63349e+06	2220741	1.75388e+06	155895	Q9ESU6	Brd4		155895
73999.9	O88665	Brd7	Bromodomain-containing protein 7	BRD7_MOUSE	10	9	12	12	13	14	15	11	12	13	14	13	13	10	13	14	9	13	13	13	83713	68326.3	197688	174381	159432	173706	191050	118151	172923	201263	248631	179946	161763	118995	202086	221129	111690	160314	195108	156679	73999.9	O88665	Brd7		73999.9
102610	Q8R3B7	Brd8	Bromodomain-containing protein 8	BRD8_MOUSE	16	15	17	15	17	18	17	18	17	18	18	17	19	13	17	16	13	16	17	16	214145	153412	389293	285871	335975	305809	353643	275771	355551	395003	445105	281415	327782	182639	408868	377099	258217	290095	387358	303346	102610	Q8R3B7	Brd8		102610
66840.2	Q3UQU0	Brd9	Bromodomain-containing protein 9	BRD9_MOUSE	9	5	11	12	8	11	11	7	11	10	12	12	9	8	10	9	9	10	9	11	103624	38568.2	187205	222723	155247	210798	186586	118399	189141	218004	243658	280216	173722	105772	256261	169155	148441	233954	260709	223925	66840.2	Q3UQU0	Brd9		66840.2
73799.1	Q8CFK2	Brf1	Transcription factor IIIB 90 kDa subunit	TF3B_MOUSE	0	0	5	0	0	2	3	2	5	5	4	0	4	0	3	3	2	3	3	3	NaN	NaN	52426.2	NaN	NaN	12866.7	21489.5	10235.1	43148.4	110617	96684.9	NaN	47892.4	NaN	32529.4	72520.2	8532.12	31269.7	14070.4	25562.1	73799.1	Q8CFK2	Brf1		73799.1
28263.1	Q8BXV2	Bri3bp	BRI3-binding protein	BRI3B_MOUSE	5	4	4	4	5	5	4	5	4	4	4	5	5	5	5	4	4	5	4	5	435462	220624	907095	973911	696497	647491	678294	515206	735209	792726	883863	750434	663472	540084	802692	795492	783694	802515	947315	810768	28263.1	Q8BXV2	Bri3bp		28263.1
131360	Q5SXJ3	Brip1	Fanconi anemia group J protein homolog	FANCJ_MOUSE	0	0	3	0	5	0	3	0	9	8	8	0	8	3	7	7	0	0	0	0	NaN	NaN	67617.4	NaN	60078.4	NaN	51155.1	NaN	111595	37814.6	135454	NaN	109678	44642.9	122304	87720	NaN	NaN	NaN	NaN	131360	Q5SXJ3	Brip1		131360
41241.1	Q9DCA5	Brix1	Ribosome biogenesis protein BRX1 homolog	BRX1_MOUSE	12	13	16	15	14	16	17	14	15	15	16	15	16	14	16	14	8	12	15	12	972035	751346	2.11938e+06	1.88096e+06	1.37594e+06	1399255	1.62788e+06	1.12795e+06	1769397	2017414	2.48666e+06	1.72367e+06	1.47305e+06	1.13726e+06	2.01853e+06	1.89714e+06	487923	804168	1.03902e+06	822114	41241.1	Q9DCA5	Brix1		41241.1
28210.5	Q99N20	Brms1	Breast cancer metastasis-suppressor 1 homolog	BRMS1_MOUSE	6	4	6	6	4	5	6	6	5	6	7	6	6	6	7	6	5	6	7	7	62451.5	22492.2	123827	90601.9	83278.1	94095.7	122713	77191.9	81164.4	110866	161588	78513.8	92873.2	76935.4	160317	131493	111791	116390	169172	152907	28210.5	Q99N20	Brms1		28210.5
37657.1	Q3U1T3	Brms1l	Breast cancer metastasis-suppressor 1-like protein	BRM1L_MOUSE	6	0	8	7	6	6	6	7	6	7	7	8	5	5	7	7	3	7	8	7	40501.6	NaN	96590.8	68498.9	62278.8	59746	70571.3	58916.9	57454.4	82802.5	88041.4	73784.4	45831.7	45920.4	89696.6	87899.9	51992	84443.9	131553	109972	37657.1	Q3U1T3	Brms1l		37657.1
46201.8	Q8K2Q7	Brox	BRO1 domain-containing protein BROX	BROX_MOUSE	9	6	9	8	7	8	9	8	7	8	6	7	9	6	7	8	5	6	7	8	146926	109155	326248	227437	269175	250060	307532	249110	222705	293238	297065	255053	254751	183060	316254	303707	187930	193686	286867	211489	46201.8	Q8K2Q7	Brox		46201.8
137310	B2RRD7	Brpf1	Peregrin	BRPF1_MOUSE	7	8	13	8	13	10	12	8	11	11	11	12	9	7	12	11	10	13	15	12	47232.7	61048.7	239318	111207	180869	152307	148030	96126.5	166059	176073	189986	115120	105261	69012.3	176593	210869	174837	194541	246854	185365	137310	B2RRD7	Brpf1		137310
135294	B2KF05	Brpf3	Bromodomain and PHD finger-containing protein 3	BRPF3_MOUSE	2	2	5	2	6	5	3	3	4	5	5	3	4	2	4	4	1	4	4	4	25556	17803.5	66295	23029.6	59443	38498.5	44297.4	26059.9	48107.7	63389.3	67087.2	25478.5	45324.3	14362.4	57219.2	50645.1	20386.3	46911.1	62074.8	47118.8	135294	B2KF05	Brpf3		135294
253957	Q921C3-2	Brwd1	Isoform B of Bromodomain and WD repeat-containing protein 1	BRWD1_MOUSE	1	2	2	3	5	3	1	3	5	5	3	1	2	2	5	4	8	15	11	14	17455.3	30215.7	53279.5	40807.6	46087.5	24317.7	14866.8	34968.7	30346.2	38975.6	36863.9	6230.88	7760.95	19203.2	51181.9	34522.5	71110.6	180187	183766	187689	253957	Q921C3-2	Brwd1		253957
202942	A2AHJ4	Brwd3	Bromodomain and WD repeat-containing protein 3	BRWD3_MOUSE	3	3	5	5	4	4	5	3	4	4	5	7	5	3	7	6	3	7	6	6	110046	77711.8	300874	266795	180493	137355	197175	130492	199968	237274	274097	210364	136890	91937.2	220957	230036	58658	101935	131401	87654.4	202942	A2AHJ4	Brwd3		202942
46952.7	Q80Y55	Bsdc1	BSD domain-containing protein 1	BSDC1_MOUSE	8	7	12	10	8	8	8	6	9	9	8	9	9	8	7	8	5	10	9	6	68306.7	55535.5	190990	127117	110551	117517	126102	62000.3	87626.1	144503	154755	117906	113610	97091.6	102849	155491	66638	105507	114738	70582.4	46952.7	Q80Y55	Bsdc1		46952.7
42444.69;42444.69-2	P18572;P18572-2	Bsg	Basigin;Isoform 2 of Basigin	BASI_MOUSE	9	9	8	8	8	9	9	8	9	8	9	9	9	9	9	9	7	7	8	7	737185	610585	1.61503e+06	1.21979e+06	958907	1.03844e+06	1.11641e+06	849331	1.4837e+06	1579717	1.87443e+06	1.10159e+06	1.08771e+06	865624	1.50967e+06	1.44851e+06	238281	273680	336662	255275	42444.7	P18572	Bsg		42444.7
34616.4	Q64277	Bst1	ADP-ribosyl cyclase/cyclic ADP-ribose hydrolase 2	BST1_MOUSE	0	0	0	0	0	0	0	0	0	0	0	0	0	0	0	0	0	1	1	1	NaN	NaN	NaN	NaN	NaN	NaN	NaN	NaN	NaN	NaN	NaN	NaN	NaN	NaN	NaN	NaN	NaN	12045.8	9785.41	9042.23	34616.4	Q64277	Bst1		34616.4
19152.1	Q8R2Q8	Bst2	Bone marrow stromal antigen 2	BST2_MOUSE	1	0	4	3	1	2	3	2	2	4	3	4	1	2	3	3	0	0	0	0	22325.3	NaN	147983	124442	25912.9	28955.5	82472.5	40882	46507.8	146268	87237.8	126994	32430.4	49667.2	91459.7	93815.3	NaN	NaN	NaN	NaN	19152.1	Q8R2Q8	Bst2		19152.1
207052	E9QAE3	Btaf1	E9B-TFIID TATA-box binding protein associated factor 1	E9QAE3_MOU	37	33	51	48	43	44	44	43	44	45	45	48	45	44	45	44	21	38	41	33	562633	417819	1297584	1.0187e+06	921900	918276	1085277	799682	1157657	1.32218e+06	1.47019e+06	1.1379e+06	931620	748186	1.36375e+06	1.21391e+06	364079	577363	699254	519773	207052	E9QAE3	Btaf1		207052
110676	Q52KH4	Btaf1	Q52Btaf1 protein (Fragment)	Q52KH4_MO	0	0	0	0	0	0	1	0	1	1	0	1	0	0	0	0	1	1	0	0	NaN	NaN	NaN	NaN	NaN	NaN	3140.872314453125	NaN	5128.28	4690.88	NaN	8209.14	NaN	NaN	NaN	NaN	1790.0653076171875	3120.929931640625	NaN	NaN	110676	Q52KH4	Btaf1		110676
53232.9	P58544	Btbd1	BTB/POZ domain-containing protein 1	BTBD1_MOUSE	1	0	0	0	0	0	0	0	0	0	2	0	0	0	0	0	0	0	0	0	22295	NaN	NaN	NaN	NaN	NaN	NaN	NaN	NaN	NaN	20296.6	NaN	NaN	NaN	NaN	NaN	NaN	NaN	NaN	NaN	53232.9	P58544	Btbd1		53232.9
53772.1	Q80X66	Btbd10	BTB/POZ domain-containing protein 10	BTBDA_MOUSE	0	0	0	0	0	0	0	0	0	0	0	0	0	0	1	0	0	0	0	0	NaN	NaN	NaN	NaN	NaN	NaN	NaN	NaN	NaN	NaN	NaN	NaN	NaN	NaN	9466.29	NaN	NaN	NaN	NaN	NaN	53772.1	Q80X66	Btbd10		53772.1
69147.5	Q8C726	Btbd9	BTB/POZ domain-containing protein 9	BTBD9_MOUSE	5	3	5	5	5	5	8	5	8	6	9	7	7	4	7	6	2	0	4	5	12457.4	14416.9	51675	31472.5	26141.2	37706.7	70607.1	42089	69188.2	61218.6	136577	77211.5	56467.5	22664.9	64327.1	61331.4	9047.08	NaN	34780.1	31888.4	69147.5	Q8C726	Btbd9		69147.5
58154.3	Q8CIF4	Btd	Biotinidase	BTD_MOUSE	0	0	2	4	3	5	3	2	4	3	4	3	5	3	3	4	1	4	4	4	NaN	NaN	26061.8	23541.7	20833.6	32007.6	29510.1	19383.8	43425.3	24219.9	55958.7	22270.6	24766	17989.5	51715.2	49438.8	19095.4	17594.8	45688.9	32189.4	58154.3	Q8CIF4	Btd		58154.3
22030.8	Q64152	Btf3	Transcription factor BTF3	BTF3_MOUSE	7	7	8	8	7	8	8	8	8	7	8	7	8	8	7	8	5	6	6	6	762610	736089	1.00264e+06	426369	1.25582e+06	1.10279e+06	1.64249e+06	1.36153e+06	1786987	1.66342e+06	2.00858e+06	1.09503e+06	1.56988e+06	1084787	1.81048e+06	1.89796e+06	368834	396421	553120	515948	22030.8	Q64152	Btf3		22030.8
17699	Q64152-2	Btf3	Isoform 2 of Transcription factor BTF3	BTF3_MOUSE	0	0	1	1	0	1	0	0	0	1	0	1	1	0	1	1	0	0	0	0	NaN	NaN	124648	32234.3	NaN	10574.9	NaN	NaN	NaN	25001.6	NaN	47916.2	15199.7	NaN	9772.76	6804	NaN	NaN	NaN	NaN	17699	Q64152-2	Btf3		17699
17270.5	Q9CQH7	Btf3l4	BT3Transcription factor BTF3 homolog 4	BT3L4_MO	6	6	7	7	6	7	6	6	6	7	7	6	8	7	7	6	5	7	6	6	366235	259266	473709	265866	677768	587886	759039	535794	704923	745768	846043	477178	603085	460970	916699	873597	417546	438438	650509	521872	17270.5	Q9CQH7	Btf3l4		17270.5
19209	P62325	Btg1	Protein BTG1	BTG1_MOUSE	0	0	0	2	0	0	1	0	0	0	0	1	0	2	1	0	1	0	1	1	NaN	NaN	NaN	22919.4	NaN	NaN	17455	NaN	NaN	NaN	NaN	23428.4	NaN	30570.4	36557.7	NaN	17246.6	NaN	23725.1	24557.9	19209	P62325	Btg1		19209
17682.4	Q04211	Btg2	Protein BTG2	BTG2_MOUSE	0	0	0	0	1	1	0	1	0	1	0	0	0	0	0	0	0	0	0	0	NaN	NaN	NaN	NaN	4446.94	6391.78	NaN	4233.95	NaN	3443.644775390625	NaN	NaN	NaN	NaN	NaN	NaN	NaN	NaN	NaN	NaN	17682.4	Q04211	Btg2		17682.4
76437.5	P35991	Btk	Tyrosine-protein kinase BTK	BTK_MOUSE	26	22	31	30	25	29	28	28	26	28	27	28	29	27	27	28	27	27	28	28	609875	412164	1.47428e+06	1.07055e+06	1.31524e+06	1142328	1475724	1.13796e+06	1.35566e+06	1.41962e+06	1.48747e+06	1118487	1.4193e+06	967677	2.00812e+06	1.72128e+06	1.40263e+06	1.5542e+06	2.06959e+06	1.61153e+06	76437.5	P35991	Btk		76437.5
34337.1;34337.1-3	Q7TSA3;Q7TSA3-3	Btla	B- and T-lymphocyte attenuator;Isoform 3 of B- and T-lymphocyte attenuator	BTLA_MOUSE	5	5	5	5	5	4	4	4	5	5	5	5	5	4	5	5	5	5	5	5	106046	78582.8	246085	275971	163343	157820	141985	95455.7	134161	162079	182356	181892	129024	98632.9	170031	141991	187630	148568	201693	171912	34337.1	Q7TSA3	Btla		34337.1
68922.87;68922.87-2	Q3ULA2;Q3ULA2-2	Btrc	F-box/WD repeat-containing protein 1A;Isoform 2 of F-box/WD repeat-containing protein 1A	FBW1A_MOUSE	8	8	12	10	8	11	8	8	9	9	10	12	10	8	9	9	6	8	8	8	118915	105178	298903	273896	211010	327241	213531	168469	240167	263265	290791	391767	192986	177784	290181	270523	73002.9	145522	186816	178852	68922.9	Q3ULA2	Btrc		68922.9
119563	O08901	Bub1	Mitotic checkpoint serine/threonine-protein kinase BUB1	BUB1_MOUSE	0	0	0	0	0	0	0	2	4	2	4	0	0	3	4	5	0	0	0	0	NaN	NaN	NaN	NaN	NaN	NaN	NaN	3086.62	24021.8	16823.1	33431.3	NaN	NaN	15176.5	33338.2	31461	NaN	NaN	NaN	NaN	119563	O08901	Bub1		119563
118392	Q9Z1S0	Bub1b	Mitotic checkpoint serine/threonine-protein kinase BUB1 beta	BUB1B_MOUSE	8	6	14	1	15	17	21	22	28	27	27	0	26	18	26	27	0	0	2	0	35996.1	27477.8	135917	1372.5152587890625	132720	174632	260477	215915	481574	528145	607788	NaN	450828	179779	594981	576177	NaN	NaN	6411.31	NaN	118392	Q9Z1S0	Bub1b		118392
36954.5	Q9WVA3	Bub3	Mitotic checkpoint protein BUB3	BUB3_MOUSE	12	12	14	14	12	12	13	13	12	13	13	14	14	13	12	12	11	13	14	12	1.89451e+06	1.41447e+06	3.78033e+06	2783309	3.11298e+06	2.72522e+06	3312184	2.51181e+06	3.7471e+06	3.95183e+06	4.42202e+06	2.74721e+06	3.17327e+06	2.24608e+06	4.1583e+06	4.05884e+06	3.14757e+06	3.12633e+06	4.11794e+06	3.43589e+06	36954.5	Q9WVA3	Bub3		36954.5
72138.8	Q8R149	Bud13	BUD13 homolog	BUD13_MOUSE	8	7	9	8	7	9	8	8	8	9	8	8	8	6	6	9	5	6	8	7	88343.7	65099	217538	120915	130021	123936	143508	91390.8	151662	153737	188767	142938	131500	61361.6	148348	155718	66219.7	110301	139163	107222	72138.8	Q8R149	Bud13		72138.8
31586.8	Q9CY21	Bud23	Probable 18S rRNA (guanine-N(7))-methyltransferase	BUD23_MOUSE	5	5	6	5	6	7	7	6	6	6	7	6	7	5	7	6	6	6	5	6	124572	109237	274306	143411	249771	234668	274579	208746	316276	310610	380063	196351	286915	124791	340191	344120	236099	224919	250298	215452	31586.8	Q9CY21	Bud23		31586.8
16999.7	Q6PGH1	Bud31	Protein BUD31 homolog	BUD31_MOUSE	9	9	10	10	9	9	9	9	9	9	9	10	9	9	9	9	9	9	9	9	387647	370762	896942	458908	789958	611070	887462	725979	771879	834823	1.00708e+06	402741	709099	406098	982420	1.02384e+06	503510	697187	1.01309e+06	784448	16999.7	Q6PGH1	Bud31		16999.7
49783.5	O54825	Bysl	Bystin	BYST_MOUSE	16	16	17	17	17	17	16	17	17	17	17	18	17	16	17	16	14	15	16	16	961119	738260	2.26455e+06	1.36809e+06	1.46917e+06	1.38718e+06	1.76155e+06	1.05175e+06	1.96951e+06	2.16912e+06	2.54422e+06	1.34876e+06	1.51135e+06	1.07127e+06	2.05949e+06	2082547	503370	548182	767257	627380	49783.5	O54825	Bysl		49783.5
48043.2	Q9CQC6	Bzw1	5eIF5-mimic protein 2	5MP2_MOUS	18	17	19	18	18	19	20	18	19	18	19	18	20	19	19	19	18	18	17	17	1.99487e+06	1.41727e+06	4110024	2.36639e+06	3.43201e+06	2905860	4.15968e+06	2.88009e+06	4197734	4.33184e+06	4.84241e+06	2.7868e+06	3897851	2.82749e+06	5036781	4.80548e+06	2.42481e+06	1.9263e+06	2.8762e+06	2.1439e+06	48043.2	Q9CQC6	Bzw1		48043.2
48063.2	Q91VK1	Bzw2	5eIF5-mimic protein 1	5MP1_MOUS	17	20	21	20	19	19	18	20	20	21	19	18	21	19	19	19	14	15	18	16	821607	630951	1.87852e+06	991748	1.24747e+06	1.16598e+06	1.55634e+06	1.18237e+06	1.78337e+06	1931939	2128557	971250	1.47455e+06	1.06454e+06	2.04522e+06	1874971	393196	416573	837625	563828	48063.2	Q91VK1	Bzw2		48063.2
15945.4	O35473	C1d	Nuclear nucleic acid-binding protein C1D	C1D_MOUSE	2	0	3	3	2	2	0	2	3	2	2	3	2	0	2	2	0	3	0	1	61064.1	NaN	73844.1	83537.2	79303.1	80198.6	NaN	35265.9	98250.1	113406	126591	87420.1	76130.3	NaN	104587	59470.6	NaN	67269	NaN	32306.5	15945.4	O35473	C1d		15945.4
42304.1	Q9JJ06	C1galt1	Glycoprotein-N-acetylgalactosamine 3-beta-galactosyltransferase 1	C1GLT_MOUSE	3	1	3	4	5	4	4	4	4	5	4	4	5	3	5	5	3	6	5	4	19924.3	4479.42	54646.3	57966	53818.7	46613.9	49469.6	34890.6	55574.6	63893	71979.6	52645.4	46337.5	34252.9	75455.4	77345.1	43081.1	66520.2	88747.6	67726.8	42304.1	Q9JJ06	C1galt1		42304.1
36067.5	Q9JMG2	C1galt1c1	C1GALT1-specific chaperone 1	C1GLC_MOUSE	8	4	9	12	9	4	9	7	8	9	9	7	8	7	8	8	6	9	10	7	54981	22731.3	121707	139743	112633	47222.2	108521	66243.3	92224.4	115143	151205	62295.1	86772.5	73553.1	110999	116526	65168.1	92629.6	106687	72870.3	36067.5	Q9JMG2	C1galt1c1		36067.5
31012.9	O35658	C1qbp	Complement component 1 Q subcomponent-binding protein, mitochondrial	C1QBP_MOUSE	5	6	6	6	6	6	5	6	6	6	6	6	6	6	6	6	5	6	6	6	1.19471e+06	880850	1.51336e+06	1.30403e+06	1.50893e+06	1.26137e+06	1573603	1.27562e+06	1.70467e+06	1.87723e+06	2.08143e+06	1.46286e+06	1.6304e+06	1.25762e+06	2.07699e+06	2.07618e+06	430406	1.1391e+06	1.3249e+06	1.24492e+06	31012.9	O35658	C1qbp		31012.9
76329.1	Q80X80	C2cd2l	C2Phospholipid transfer protein C2CD2L	C2C2L_MOU	0	0	0	1	3	1	2	2	1	2	2	0	2	0	0	0	0	2	3	2	NaN	NaN	NaN	3505.78	31019.5	2862.128173828125	27719.1	13074.8	13648.6	20844.8	17770.8	NaN	11556.9	NaN	NaN	NaN	NaN	13533.8	40093.6	27615.4	76329.1	Q80X80	C2cd2l		76329.1
255345.71;255345.71-2;255345.71-3	Q52KB6;Q52KB6-2;Q52KB6-3	C2cd3	C2C2 domain-containing protein 3;C2Isoform 2 of C2 domain-containing protein 3;C2Isoform 3 of C2 domain-containing protein 3	C2CD3_MOU	0	0	2	2	0	1	0	0	0	1	0	0	1	0	0	0	0	2	2	0	NaN	NaN	14336.9	10870.4	NaN	9771.86	NaN	NaN	NaN	11693	NaN	NaN	6424.57	NaN	NaN	NaN	NaN	12132.4	6795.54	NaN	255346	Q52KB6	C2cd3		255346
111664	Q7TPS5	C2cd5	C2C2 domain-containing protein 5	C2CD5_MOU	0	5	13	7	7	7	7	4	7	8	11	0	11	5	8	8	5	9	13	6	NaN	19093.2	164997	67771.6	84684.9	69718.2	74482.7	41187.1	72929.7	102435	145371	NaN	127786	36513.6	124064	100598	57361.3	96878.8	178366	73438	111664	Q7TPS5	C2cd5		111664
186484	P01027	C3	Complement C3	CO3_MOUSE	2	2	4	6	2	5	4	2	4	4	5	6	5	4	4	4	3	6	8	7	15547	12242.9	75540.1	133677	22557.5	41631.2	53943.1	29746.6	55462.8	69292.6	104595	88921.4	78251.8	47248.3	70122	84644.8	40352.3	253358	208067	264637	186484	P01027	C3		186484
192915	P01029	C4b	Complement C4-B	CO4B_MOUSE	0	2	5	3	2	1	4	1	2	2	4	0	0	1	3	1	3	5	6	2	NaN	10663.8	29177.7	27901.8	16635.3	12191.9	38951	11087.4	24257.8	34424.1	44954.9	NaN	NaN	8783.09	32187	22614.2	60089.6	107166	141627	62850.2	192915	P01029	C4b		192915
54277.57;54277.57-2	Q6DFW0;Q6DFW0-2	C9orf72	Guanine nucleotide exchange factor C9orf72 homolog;Isoform 2 of Guanine nucleotide exchange factor C9orf72 homolog	CI072_MOUSE	0	0	2	3	0	0	0	0	0	1	2	3	2	0	0	1	0	0	2	0	NaN	NaN	11035.7	22179.2	NaN	NaN	NaN	NaN	NaN	6216.77	9241.13	19953.9	6144.72	NaN	NaN	4889.27	NaN	NaN	10436.7	NaN	54277.6	Q6DFW0	C9orf72		54277.6
28330.5	P13634	Ca1	Carbonic anhydrase 1	CAH1_MOUSE	0	0	0	0	0	0	0	0	0	0	0	0	0	0	0	0	2	8	9	7	NaN	NaN	NaN	NaN	NaN	NaN	NaN	NaN	NaN	NaN	NaN	NaN	NaN	NaN	NaN	NaN	47726.1	239344	396440	243636	28330.5	P13634	Ca1		28330.5
29522.2	Q9D6N1	Ca13	Carbonic anhydrase 13	CAH13_MOUSE	6	7	7	6	6	7	7	7	7	8	7	7	9	7	9	6	0	0	3	2	156557	129489	491525	191379	172448	237704	359614	188557	570418	647310	795643	264071	475242	311639	585529	434523	NaN	NaN	25157.1	13452.3	29522.2	Q9D6N1	Ca13		29522.2
29032.5	P00920	Ca2	Carbonic anhydrase 2	CAH2_MOUSE	10	10	10	10	9	9	10	10	11	11	11	10	10	9	11	11	8	11	10	9	652105	488057	1.73254e+06	437127	728931	594401	1.22073e+06	680277	1.5329e+06	1.83358e+06	2155432	537166	956474	568000	1.58309e+06	1.26976e+06	530448	647326	1.02185e+06	663104	29032.5	P00920	Ca2		29032.5
37825.4	Q8VDY9	Caap1	Caspase activity and apoptosis inhibitor 1	CAAP1_MOUSE	5	2	7	6	6	7	5	6	7	7	6	6	6	5	4	7	6	6	7	6	47738.5	19343.6	126990	90799.9	83876	79311	81013.5	55026.4	108642	115385	108633	80442.5	90922.4	53860.3	78929	124823	74081.6	105598	114610	108520	37825.4	Q8VDY9	Caap1		37825.4
39842.9	Q06138	Cab39	Calcium-binding protein 39	CAB39_MOUSE	12	13	16	15	14	14	14	13	14	15	15	15	15	14	15	15	12	13	12	13	584494	444106	1140357	664042	1.07415e+06	892664	1.29718e+06	981109	1.16179e+06	1.26022e+06	1.41534e+06	890042	1.07938e+06	728872	1.54305e+06	1.46474e+06	705669	760829	1.11588e+06	878645	39842.9	Q06138	Cab39		39842.9
39105.6	Q9DB16	Cab39l	Calcium-binding protein 39-like	CB39L_MOUSE	9	8	11	10	11	11	12	10	12	11	12	11	12	11	13	11	11	9	13	11	115996	71531.6	391106	173598	238484	239034	299475	206104	265994	246176	321714	248679	297385	194761	337494	269544	199370	157945	309075	211111	39105.6	Q9DB16	Cab39l		39105.6
243217.66;243171.58	B9EKC5;G3X8Q1	Cabin1	B9Calcineurin binding protein 1;G3X8Calcineurin binding protein 1	B9EKC5_MOU;G3X8Q1_M	5	5	13	11	12	13	13	9	14	17	15	12	15	5	12	12	5	15	14	11	25902.3	18833.2	111729	57932.9	84474.7	59660.8	86451.2	53293.9	103103	131848	136850	70371.3	90193.4	34951.5	107255	96204.2	37512.1	98680.9	122288	86035.5	243218	B9EKC5	Cabin1		243218
42301.9	Q8C633	Cabs1	Calcium-binding and spermatid-specific protein 1	CABS1_MOUSE	1	0	0	1	1	1	1	1	1	1	0	0	1	1	1	1	0	1	1	1	35681.8	NaN	NaN	19747.2	60457.6	47947.6	56585.4	52765.7	60201.8	58460.1	NaN	NaN	42741.1	36847	65403.2	71829.8	NaN	69427.2	72676.8	71552.4	42301.9	Q8C633	Cabs1		42301.9
143812.43;143812.43-2	Q6PDJ1;Q6PDJ1-2	Cachd1	VWFA and cache domain-containing protein 1;Isoform 2 of VWFA and cache domain-containing protein 1	CAHD1_MOUSE	1	0	1	0	1	1	0	1	0	0	1	1	1	1	1	1	0	1	0	0	69571.5	NaN	137156	NaN	133039	109609	NaN	112088	NaN	NaN	224700	88854.9	125518	94544.5	213944	238569	NaN	67834.9	NaN	NaN	143812	Q6PDJ1	Cachd1		143812
90661.4	Q9CS00	Cactin	Splicing factor Cactin	CATIN_MOUSE	13	12	18	16	17	15	13	15	17	16	17	16	16	12	15	15	14	18	17	17	171945	120577	386170	263893	324144	251451	324928	211153	367097	370359	472094	268747	260339	178525	420476	406887	199712	322077	436735	369477	90661.4	Q9CS00	Cactin		90661.4
42106.1	Q8R0X2	Cacul1	CDK2-associated and cullin domain-containing protein 1	CACL1_MOUSE	4	2	9	6	6	4	6	6	5	7	6	6	7	5	7	5	2	3	3	4	28363.1	20077.2	154484	76759.3	57223.9	50907.5	74797.7	69324.3	78956	89843.4	114046	69859	90464.6	62429.9	147905	100728	21022.7	28115.5	28853.7	47067.4	42106.1	Q8R0X2	Cacul1		42106.1
26510.2	Q9CXW3	Cacybp	Calcyclin-binding protein	CYBP_MOUSE	13	14	14	16	15	16	15	15	15	15	15	15	16	15	16	15	12	15	14	13	1.53435e+06	1.1591e+06	3.05044e+06	2.05922e+06	2410308	2.3161e+06	3.23883e+06	2.16793e+06	3.878e+06	4038747	4832907	2.89521e+06	3.40255e+06	2491636	4488312	4.09582e+06	1.25547e+06	1.35956e+06	1.92368e+06	1.45734e+06	26510.2	Q9CXW3	Cacybp		26510.2
243238	B2RQC6	Cad	CAD protein	PYR1_MOUSE	83	77	93	87	86	89	89	85	88	91	91	89	91	88	91	88	62	69	81	74	4367313	2.90907e+06	9215724	5.14864e+06	7.04139e+06	6.8461e+06	8807805	6254564	9775183	10485162	11972917	6440961	8588226	5.92457e+06	11606211	10545701	2.20199e+06	2.40553e+06	3.68201e+06	2.78338e+06	243238	B2RQC6	Cad		243238
14622.7	Q99MP3	Calcb	Calcitonin gene-related peptide 2	CALCB_MOUSE	0	0	0	0	1	0	0	1	0	1	0	0	0	0	1	0	0	1	0	0	NaN	NaN	NaN	NaN	52803.5	NaN	NaN	45860	NaN	59929.1	NaN	NaN	NaN	NaN	81385.7	NaN	NaN	48722.5	NaN	NaN	14622.7	Q99MP3	Calcb		14622.7
77280.2	Q8CGU1	Calcoco1	Calcium-binding and coiled-coil domain-containing protein 1	CACO1_MOUSE	9	9	11	9	12	11	10	9	6	7	6	6	9	5	9	0	6	8	8	6	54756.8	50742.9	122131	64158.2	122537	104883	128209	95752.6	31801.9	76429.2	42670.6	24929.9	47742.1	38701.9	89806.7	NaN	35192.8	40576.2	71596.1	38640	77280.2	Q8CGU1	Calcoco1		77280.2
63335.09;61652.24;89273.46;61836.44;60452.9;60748.35	D3Z6I7;E9Q0M9;E9QA15;E9QA16;Q8VCQ8;S4R1T7	Cald1	D3Z6Caldesmon 1;E9Q0Caldesmon 1;E9Caldesmon 1;E9Caldesmon 1;Q8Caldesmon 1;S4R1Caldesmon 1	D3Z6I7_M;E9Q0M9_M;E9QA15_MOU;E9QA16_MOU;Q8VCQ8_MOU;S4R1T7_M	0	0	0	0	0	0	0	0	0	0	0	0	0	0	0	0	0	5	5	5	NaN	NaN	NaN	NaN	NaN	NaN	NaN	NaN	NaN	NaN	NaN	NaN	NaN	NaN	NaN	NaN	NaN	25169.3	57997.8	41872.9	63335.1	D3Z6I7	Cald1		63335.1
35823.3	Q8VEC4	Calhm2	Calcium homeostasis modulator protein 2	CAHM2_MOUSE	4	3	6	4	3	4	4	3	3	3	3	4	4	3	5	4	2	6	6	6	38024.9	38851.2	122066	76179.5	68596.3	56893.9	75574.1	40939.5	58756.5	74420.9	62117.8	56912	60028.8	40232.6	100258	85154.7	75598.6	115488	122244	126435	35823.3	Q8VEC4	Calhm2		35823.3
34955.7	Q8C9E8	Calhm6	Calcium homeostasis modulator protein 6	CAHM6_MOUSE	1	0	2	2	1	1	2	0	1	1	1	1	1	0	1	1	1	1	1	1	4987.53	NaN	22377.4	15383.6	7437.76	5583.1	17580.9	NaN	6771.47	9918.1	15768.7	7956.77	5989.68	NaN	9001.08	7825.55	10977.7	7866.08	13847.6	12307.3	34955.7	Q8C9E8	Calhm6		34955.7
16837.58;16837.58;16837.58	P0DP26;P0DP27;P0DP28	Calm1;Calm2;Calm3	Calmodulin-1;Calmodulin-2;Calmodulin-3	CALM1_MOUSE;CALM2_MOUSE;CALM3_MOUSE	6	6	8	7	8	7	8	9	8	8	7	8	8	8	9	8	6	8	8	7	129249	97405.7	407565	253063	300914	271441	375772	304760	340367	430108	389882	243141	472142	388802	638739	917144	360371	371515	514387	352008	16837.6	P0DP26	Calm1		16837.6
47994.5	P14211	Calr	Calreticulin	CALR_MOUSE	25	28	28	28	30	29	31	30	31	30	29	28	31	27	28	29	23	30	27	29	11033357	9405596	20558784	15714910	18005228	15001045	19138224	15990565	19846406	20773146	23681234	15416700	17711762	12152040	23699182	23926244	14843643	17093860	20232826	17707064	47994.5	P14211	Calr		47994.5
37063.7	O35887	Calu	Calumenin	CALU_MOUSE	14	14	17	16	16	16	17	16	17	17	16	16	16	15	14	15	15	16	17	17	846366	656030	1.49209e+06	937466	1.75641e+06	1.47536e+06	1861168	1.09556e+06	1.67809e+06	1.86334e+06	2.13299e+06	890079	1.41489e+06	1081761	1.9851e+06	1.93071e+06	1.40446e+06	1.591e+06	1946344	1.65425e+06	37063.7	O35887	Calu		37063.7
42918.8	Q8BW96	Camk1d	Calcium/calmodulin-dependent protein kinase type 1D	KCC1D_MOUSE	6	5	9	11	10	9	10	9	10	8	9	10	11	10	7	10	8	10	13	10	64232.6	38979.2	182325	171489	186809	133173	195730	141694	136233	138635	196334	122231	172081	100315	180963	211054	184806	197884	304856	199832	42918.8	Q8BW96	Camk1d		42918.8
56369.4	Q6PHZ2	Camk2d	Calcium/calmodulin-dependent protein kinase type II subunit delta	KCC2D_MOUSE	15	15	17	15	18	17	18	17	17	17	18	17	18	15	18	17	18	16	16	17	674638	435568	1.37741e+06	924079	1.25423e+06	1.02372e+06	1.36312e+06	1.07136e+06	1.15477e+06	1.15344e+06	1.3593e+06	1.04582e+06	1133131	757804	1.48908e+06	1.40374e+06	1.24724e+06	1.11567e+06	1.74863e+06	1415879	56369.4	Q6PHZ2	Camk2d		56369.4
54113.83;55645.47;57747.89	Q6PHZ2-2;Q6PHZ2-4;Q6PHZ2-5	Camk2d	Isoform 2 of Calcium/calmodulin-dependent protein kinase type II subunit delta;Isoform 3 of Calcium/calmodulin-dependent protein kinase type II subunit delta;Isoform 4 of Calcium/calmodulin-dependent protein kinase type II subunit delta	KCC2D_MOUSE	1	1	1	1	1	1	0	1	1	1	1	1	1	1	0	0	1	1	1	0	31726.7	20999.1	74173.7	47324.2	71787.9	52951.2	NaN	51325.7	58798.2	60108.8	72609	46790.9	50228.6	39186.3	NaN	NaN	72001.6	68041.8	91479.4	NaN	54113.8	Q6PHZ2-2	Camk2d		54113.8
59606.87;59606.87-2;59606.87-3	Q923T9;Q923T9-2;Q923T9-3	Camk2g	Calcium/calmodulin-dependent protein kinase type II subunit gamma;Isoform 2 of Calcium/calmodulin-dependent protein kinase type II subunit gamma;Isoform 3 of Calcium/calmodulin-dependent protein kinase type II subunit gamma	KCC2G_MOUSE	3	3	9	6	6	5	6	6	6	7	7	7	8	5	8	7	3	6	8	7	29752.2	21757.4	110757	71125.2	70369.4	53743.3	88995	57399.2	65646.6	66850.9	101324	62960.2	83975.5	39158.4	119871	100760	20186.1	50046.3	98550.2	65324.9	59606.9	Q923T9	Camk2g		59606.9
64617.5;64617.5-2;64617.5-3;64617.5-4;64617.5-5	Q8C078;Q8C078-2;Q8C078-3;Q8C078-4;Q8C078-5	Camkk2	Calcium/calmodulin-dependent protein kinase kinase 2;Isoform 2 of Calcium/calmodulin-dependent protein kinase kinase 2;Isoform 3 of Calcium/calmodulin-dependent protein kinase kinase 2;Isoform 4 of Calcium/calmodulin-dependent protein kinase kinase 2;Isoform 5 of Calcium/calmodulin-dependent protein kinase kinase 2	KKCC2_MOUSE	3	0	5	3	8	5	6	6	3	6	8	0	6	5	7	5	3	4	7	5	24610	NaN	50920.8	19168.4	82230.1	59324.5	78819.2	57531.3	34255.3	71625.7	90618.4	NaN	63989.4	50756.8	85836.5	66999.3	34803.9	35568.9	60400.2	45287.7	64617.5	Q8C078	Camkk2		64617.5
32542.1	P49070	Camlg	Guided entry of tail-anchored proteins factor CAMLG	CAMLG_MOUSE	1	0	1	1	1	0	0	0	0	1	0	0	1	0	1	0	0	0	1	0	5828.33	NaN	16064.1	8814.45	8545.42	NaN	NaN	NaN	NaN	14197.1	NaN	NaN	7239.56	NaN	10842.5	NaN	NaN	NaN	10568.8	NaN	32542.1	P49070	Camlg		32542.1
175887	A2AHC3	Camsap1	Calmodulin-regulated spectrin-associated protein 1	CAMP1_MOUSE	6	0	8	7	10	8	6	6	8	8	12	6	9	4	10	9	2	3	3	4	20167.5	NaN	49595.9	46548.9	75866.7	56390	69466.2	33508.2	87544	83495.1	116620	44125.7	72677.7	37750.1	87090.9	81619.5	16317.4	21886.8	34537	33628.6	175887	A2AHC3	Camsap1		175887
164332.55;164332.55-2	Q8C1B1;Q8C1B1-2	Camsap2	Calmodulin-regulated spectrin-associated protein 2;Isoform 2 of Calmodulin-regulated spectrin-associated protein 2	CAMP2_MOUSE	4	1	6	4	7	7	6	0	7	9	7	9	7	1	6	8	0	0	4	3	18093	2184.21	74342.3	27334.4	45197.2	54159.3	43755.4	NaN	61424.7	66928.8	73620.6	59672.7	39402.1	3526.220458984375	50833.2	81529.3	NaN	NaN	25964.9	17389.8	164333	Q8C1B1	Camsap2		164333
136332	Q6ZQ38	Cand1	Cullin-associated NEDD8-dissociated protein 1	CAND1_MOUSE	46	47	56	55	49	51	50	50	52	54	49	51	51	51	51	50	42	49	50	46	2.57265e+06	1.90745e+06	5.83192e+06	3.69249e+06	4.70772e+06	4162314	5511362	3932241	5.48361e+06	6.02118e+06	6.99111e+06	4537128	5106032	3702534	6941791	6421081	3.73785e+06	3.66073e+06	5.54427e+06	4.12379e+06	136332	Q6ZQ38	Cand1		136332
135633	Q6ZQ73	Cand2	Cullin-associated NEDD8-dissociated protein 2	CAND2_MOUSE	10	5	14	5	12	13	14	11	19	19	22	9	20	13	21	19	6	12	19	14	42902.9	26494.6	183532	35482.6	103187	141172	167344	109183	233606	308097	378471	97239.3	291275	103674	354465	284512	81804.3	131573	154287	196264	135633	Q6ZQ73	Cand2		135633
45652.5;45652.5-3	Q8VCF1;Q8VCF1-3	Cant1	Soluble calcium-activated nucleotidase 1;Isoform 3 of Soluble calcium-activated nucleotidase 1	CANT1_MOUSE	6	6	11	8	11	9	11	8	8	8	7	8	9	4	7	7	4	8	9	9	51369.5	46446.3	132036	116360	125433	98925.5	139196	82535.9	93560.8	104270	117999	100599	94089.9	42892.5	106723	101455	69480.7	104810	113060	108045	45652.5	Q8VCF1	Cant1		45652.5
67277.9	P35564	Canx	Calnexin	CALX_MOUSE	31	32	38	37	33	32	32	32	30	32	34	33	31	32	33	32	28	35	32	32	6953415	5.94821e+06	13285890	10899310	10414562	9266079	11267681	8705966	11813434	12478306	14578695	10818541	10079277	7253583	13040459	13075462	5.51049e+06	6864475	8325040	6939194	67277.9	P35564	Canx		67277.9
51564.8	P40124	Cap1	Adenylyl cyclase-associated protein 1	CAP1_MOUSE	23	23	28	27	25	25	23	24	22	23	22	25	25	24	24	22	23	24	25	23	6478289	4.5066e+06	12961600	8865548	11983538	10695589	13641215	9841704	11519456	12238978	13411603	11110409	11171475	8685013	14667461	13638152	12569137	12528627	17265248	13448296	51564.8	P40124	Cap1		51564.8
39240.4	P24452	Capg	Macrophage-capping protein	CAPG_MOUSE	11	11	11	11	11	11	11	11	11	11	11	11	11	11	11	11	11	11	11	11	3.84613e+06	2.99063e+06	8552311	5381305	7.56844e+06	6.88345e+06	8823779	6.60992e+06	6412414	6976808	7.93941e+06	6.83682e+06	6.79353e+06	5.10855e+06	8908172	8.16953e+06	9346308	8887920	12440178	9697749	39240.4	P24452	Capg		39240.4
82106.3	O35350	Capn1	Calpain-1 catalytic subunit	CAN1_MOUSE	36	34	37	37	37	37	36	35	35	37	37	35	36	35	36	34	33	36	36	35	989674	768274	2.34136e+06	1.79331e+06	1.84019e+06	1.51297e+06	2093186	1.49383e+06	1.658e+06	1.79612e+06	2.07283e+06	1.57145e+06	1.70862e+06	1.29135e+06	2163032	2.04634e+06	1.82962e+06	2.09057e+06	2.95914e+06	2289541	82106.3	O35350	Capn1		82106.3
118718.7;118718.7-2	Q9JLG8;Q9JLG8-2	Capn15	Calpain-15;Isoform 2 of Calpain-15	CAN15_MOUSE	1	0	1	0	0	0	0	0	0	0	0	0	0	0	1	0	0	1	1	0	6867.98	NaN	11992.8	NaN	NaN	NaN	NaN	NaN	NaN	NaN	NaN	NaN	NaN	NaN	16852.5	NaN	NaN	6615.64	20896.2	NaN	118719	Q9JLG8	Capn15		118719
79872.2	O08529	Capn2	Calpain-2 catalytic subunit	CAN2_MOUSE	14	12	17	16	17	15	17	15	16	16	16	15	19	13	14	16	16	18	19	17	115494	72490	258388	181658	257634	216672	350153	230026	228258	223672	269928	173105	226418	161750	316912	315418	231002	339702	514592	374807	79872.2	O08529	Capn2		79872.2
92564.3	Q9R1S8	Capn7	Calpain-7	CAN7_MOUSE	6	3	13	11	12	9	13	12	13	11	12	11	12	9	11	15	5	9	11	10	40009.5	18597	136186	92540	107515	95276.1	159372	116541	158821	147594	181926	122771	110068	85509.8	158243	208232	21161.3	64187.8	115113	76868.9	92564.3	Q9R1S8	Capn7		92564.3
28406	O88456	Capns1	Calpain small subunit 1	CPNS1_MOUSE	8	7	8	8	8	8	8	8	7	8	8	8	8	8	8	7	8	8	8	7	262832	213143	645089	495079	561873	444628	631660	469736	611021	670197	704191	467179	582011	407106	866034	801329	619568	654474	868920	681268	28406	O88456	Capns1		28406
27189.8	Q9D7J7	Capns2	Calpain small subunit 2	CPNS2_MOUSE	0	1	0	1	0	0	0	0	0	0	0	0	0	0	0	0	0	1	0	0	NaN	5785.23	NaN	1424.640869140625	NaN	NaN	NaN	NaN	NaN	NaN	NaN	NaN	NaN	NaN	NaN	NaN	NaN	5448.47	NaN	NaN	27189.8	Q9D7J7	Capns2		27189.8
78168.9	Q60865	Caprin1	Caprin-1	CAPR1_MOUSE	15	15	21	18	17	17	16	16	18	17	17	16	18	14	16	15	11	12	13	14	1.77979e+06	1.44649e+06	3.21086e+06	1652753	2799361	2.3403e+06	3.26781e+06	2.64595e+06	3.85981e+06	3.88555e+06	4.46735e+06	2190337	3142155	2.13093e+06	4.20669e+06	4.15023e+06	661034	680232	1.13074e+06	835785	78168.9	Q60865	Caprin1		78168.9
32939.8	P47753	Capza1	F-actin-capping protein subunit alpha-1	CAZA1_MOUSE	10	10	12	11	11	11	11	11	11	11	11	11	11	11	11	10	10	11	11	11	3.04338e+06	2.39355e+06	5.46324e+06	4.14371e+06	5.34603e+06	4636232	5849675	4.50154e+06	5563200	5.98227e+06	6.53852e+06	5074859	5169091	3.95696e+06	6.59316e+06	6587268	5219045	5.94522e+06	7826255	6522923	32939.8	P47753	Capza1		32939.8
32967.1	P47754	Capza2	F-actin-capping protein subunit alpha-2	CAZA2_MOUSE	13	13	15	14	14	14	14	14	14	15	14	15	15	14	15	13	12	15	15	14	1.65051e+06	1.20391e+06	3.20734e+06	2702959	2953247	2.67986e+06	3.33388e+06	2344110	3.01892e+06	3.27003e+06	3.63114e+06	2986840	2.86646e+06	2229012	3528587	3402198	2.66115e+06	3045080	4.22576e+06	3.2811e+06	32967.1	P47754	Capza2		32967.1
30628.7	P47757-2	Capzb	Isoform 2 of F-actin-capping protein subunit beta	CAPZB_MOUSE	20	21	24	23	22	22	21	23	23	22	23	23	22	19	22	20	21	23	21	21	4843804	3.47226e+06	9385099	7.48824e+06	8.35062e+06	6989803	9017940	6220737	8601263	9167806	9907650	8.13267e+06	8.21493e+06	5.98064e+06	10108361	9512109	9723087	9223420	12271673	9809068	30628.7	P47757-2	Capzb		30628.7
133468	Q8CIS0-2	Card11	Isoform 2 of Caspase recruitment domain-containing protein 11	CAR11_MOUSE	27	22	36	36	34	36	36	35	35	34	37	35	36	32	39	39	32	38	40	38	319362	217399	823932	627332	831204	799263	935014	720733	793572	826848	1.01841e+06	715927	907102	594434	1.28946e+06	1.28314e+06	844384	1.01413e+06	1.47227e+06	1.12863e+06	133468	Q8CIS0-2	Card11		133468
20936	Q9D1I2	Card19	Caspase recruitment domain-containing protein 19	CAR19_MOUSE	1	0	4	3	3	0	3	0	2	0	3	2	0	4	1	0	2	7	5	5	5752.23	NaN	36926.1	20361.1	29634.9	NaN	18117.8	NaN	20091.8	NaN	34790.2	16857.3	NaN	32723	14812.3	NaN	16939.9	88570.2	70326.2	56108.3	20936	Q9D1I2	Card19		20936
131469	E9PWH2	Card6	E9Caspase recruitment domain family, member 6	E9PWH2_MOU	3	2	5	9	9	8	8	7	8	6	6	6	8	4	7	9	7	12	13	13	14227.5	2955.305908203125	57310.3	48539.4	64651.1	55098.6	41537.6	58628.7	66198.7	45951.3	64105.9	39408.4	73021.4	17350.8	50301.4	108128	60365.5	116100	146447	121791	131469	E9PWH2	Card6		131469
16062.3	Q9CR86	Carhsp1	Calcium-regulated heat stable protein 1	CHSP1_MOUSE	3	3	3	3	3	4	4	3	3	3	4	3	4	3	3	3	3	3	3	3	36856.8	28322.4	71342.8	54683.2	80833.3	91810.2	131178	65748.6	77731.8	89497.9	110055	62392.2	111377	64960.2	114756	99186.4	55041.6	67045.8	89913.2	71224.1	16062.3	Q9CR86	Carhsp1		16062.3
65853.66;65853.66-2	Q9WVG6;Q9WVG6-2	Carm1	Histone-arginine methyltransferase CARM1;Isoform 2 of Histone-arginine methyltransferase CARM1	CARM1_MOUSE	11	12	14	12	13	13	13	13	13	13	13	13	13	11	12	12	8	10	13	11	228755	179471	460344	308451	403345	339695	452117	314009	481958	535520	595882	300683	433170	298074	555302	554682	201634	182217	340057	211010	65853.7	Q9WVG6	Carm1		65853.7
151860.31;151860.31-3	Q6EDY6;Q6EDY6-3	Carmil1	F-actin-uncapping protein LRRC16A;Isoform 3 of F-actin-uncapping protein LRRC16A	CARL1_MOUSE	0	0	0	0	1	0	0	1	0	1	0	0	0	0	0	0	0	0	0	0	NaN	NaN	NaN	NaN	3211.19	NaN	NaN	3155.92	NaN	13048.4	NaN	NaN	NaN	NaN	NaN	NaN	NaN	NaN	NaN	NaN	151860	Q6EDY6	Carmil1		151860
79761.5	Q3V3V9-2	Carmil2	Isoform 2 of Capping protein, Arp2/3 and myosin-I linker protein 2	CARL2_MOUSE	1	1	1	2	1	1	2	1	1	2	1	1	2	1	2	2	1	2	1	2	9224.79	9392.48	20454.5	23402.8	18759.1	19605	27922.4	14277.6	11563.4	37430.1	25325.7	12788	34271	20140.6	39218.4	40311.5	20637.1	28782.1	26658	36661	79761.5	Q3V3V9-2	Carmil2		79761.5
141372	Q3V3V9	Carmil2	Capping protein, Arp2/3 and myosin-I linker protein 2	CARL2_MOUSE	15	11	20	21	20	19	24	19	22	20	25	23	25	18	23	22	19	26	26	26	163198	70723.4	406900	326637	361908	340034	483282	322977	406151	414127	516249	345368	457919	259151	563331	564764	402446	500301	666132	537376	141372	Q3V3V9	Carmil2		141372
46338.7	Q80UY1	Carnmt1	Carnosine N-methyltransferase	CARME_MOUSE	5	3	6	6	5	6	6	5	6	6	6	6	6	4	6	6	5	4	5	5	99338.5	76413.7	222501	174872	199193	191499	244629	187704	275213	325689	377217	249045	263072	188917	345156	338066	107345	80302.1	187679	158516	46338.7	Q80UY1	Carnmt1		46338.7
94859.8	Q9ER72	Cars1	Cysteine--tRNA ligase, cytoplasmic	SYCC_MOUSE	34	26	38	36	36	36	36	36	34	33	36	34	37	33	36	32	20	28	26	26	1303678	894462	2.61727e+06	1.51487e+06	2.54822e+06	2.30413e+06	3.0266e+06	2.16039e+06	2.66974e+06	2.82052e+06	3257376	1.94162e+06	2.16796e+06	1.51828e+06	3161690	2.63126e+06	445325	437826	846467	554640	94859.8	Q9ER72	Cars1		94859.8
61271.6	Q8BYM8	Cars2	Probable cysteine--tRNA ligase, mitochondrial	SYCM_MOUSE	10	8	10	11	9	9	11	10	9	12	12	10	12	11	11	9	9	10	12	9	71436.6	40734.5	153049	137560	100438	89465.5	155465	97040	114731	177231	186386	101882	124052	89744.1	150223	139693	121322	135357	168487	122472	61271.6	Q8BYM8	Cars2		61271.6
75770.2	Q8K3W3	Casc3	Protein CASC3	CASC3_MOUSE	7	5	8	8	8	8	9	7	8	6	12	9	7	5	6	9	4	3	5	6	63420.4	35584	151716	116775	98593	93576.3	123892	120096	99615.5	78008.8	176346	104243	103726	54431.5	95487.3	125835	27098	37711.7	62094.2	61807.5	75770.2	Q8K3W3	Casc3		75770.2
91603.5	Q7TN73	Casd1	N-acetylneuraminate 9-O-acetyltransferase	CASD1_MOUSE	2	0	2	0	0	2	0	0	2	3	3	0	0	2	2	0	0	2	1	0	19225.9	NaN	35491.5	NaN	NaN	22581.6	NaN	NaN	31584.3	40537.7	55442.8	NaN	NaN	12743.9	27049.1	NaN	NaN	7931.58	5410.15	NaN	91603.5	Q7TN73	Casd1		91603.5
45640.5	P29452	Casp1	Caspase-1	CASP1_MOUSE	15	16	20	19	17	17	17	16	17	18	17	18	18	17	17	17	17	18	19	17	375397	266446	922833	593225	713379	694794	892892	632597	803599	872890	1.07554e+06	707839	772286	590087	1.12753e+06	977469	707453	730163	1.25116e+06	879859	45640.5	P29452	Casp1		45640.5
50660.9	P29594	Casp2	Caspase-2	CASP2_MOUSE	7	6	12	8	12	11	11	11	12	14	13	10	14	11	12	10	9	12	12	13	44625.9	30430	145189	72146.8	139671	114313	154208	117143	156257	203209	206088	125101	185102	125254	198948	166714	98717.8	147803	221508	162135	50660.9	P29594	Casp2		50660.9
31474.8	P70677	Casp3	Caspase-3	CASP3_MOUSE	8	4	8	7	7	9	8	7	9	9	9	9	9	9	8	9	7	8	9	9	144589	45280.2	318139	141455	255232	248727	333703	199858	350527	377605	440188	190005	357399	229545	423693	478558	284316	244127	465218	322704	31474.8	P70677	Casp3		31474.8
42741.9	P70343	Casp4	Caspase-4	CASP4_MOUSE	0	0	7	7	4	2	6	0	8	7	7	9	4	6	8	7	0	0	0	0	NaN	NaN	78934.5	88410.9	26692.6	15501.3	46329.6	NaN	85728.3	81672.9	76954.3	120079	37518.5	42442.1	90503.9	75123.5	NaN	NaN	NaN	NaN	42741.9	P70343	Casp4		42741.9
31595	O08738	Casp6	Caspase-6	CASP6_MOUSE	9	8	9	9	9	9	11	9	9	10	9	10	9	9	10	8	8	11	10	11	164144	123598	287657	188559	335243	294463	448091	327116	297748	351577	405468	302047	309260	255903	490145	431834	320834	389580	586220	430459	31595	O08738	Casp6		31595
34060.6	P97864	Casp7	Caspase-7	CASP7_MOUSE	4	1	4	4	5	5	4	4	7	5	4	5	5	4	6	5	4	4	5	6	16732.3	4508.57	37019.4	26713.4	47675.1	35500.9	39941.3	28139.3	95448.6	63973.7	66754.2	47075.8	53423	33052.6	86150.7	87012.3	41316.3	37007.9	79455.2	74468.2	34060.6	P97864	Casp7		34060.6
55356.9	O89110	Casp8	Caspase-8	CASP8_MOUSE	20	19	24	19	22	23	21	21	23	22	25	22	24	21	23	22	17	21	21	23	514220	395994	1.21418e+06	583206	1.1936e+06	945964	1.42478e+06	1.06618e+06	1.45129e+06	1.56172e+06	1.79928e+06	864983	1.49444e+06	856485	2.07096e+06	2054647	605708	663681	1.07764e+06	811439	55356.9	O89110	Casp8		55356.9
219091	Q9WUF3	Casp8ap2	C8CASP8-associated protein 2	C8AP2_MOU	1	0	0	2	0	0	0	0	0	1	2	0	0	1	0	3	0	0	0	0	6758.72	NaN	NaN	9107.32	NaN	NaN	NaN	NaN	NaN	8851.19	11946.1	NaN	NaN	12454.1	NaN	18267.5	NaN	NaN	NaN	NaN	219091	Q9WUF3	Casp8ap2		219091
49979.1	Q8C3Q9	Casp9	Caspase-9	CASP9_MOUSE	3	1	2	1	4	4	4	2	4	5	6	3	5	1	4	4	2	6	6	6	14003.2	5057.81	22032	10112.1	34818.7	31979.1	41016.9	14648	35574.9	48380.6	58335.7	15365.3	38799.5	8681.8	47806.2	43525.8	21802	55429.1	74421.6	56741.2	49979.1	Q8C3Q9	Casp9		49979.1
84921.73;84921.73-2;84921.73-6	P51125;P51125-2;P51125-6	Cast	Calpastatin;Isoform 2 of Calpastatin;Isoform 6 of Calpastatin	ICAL_MOUSE	22	23	25	21	27	28	28	31	28	25	26	25	29	25	30	27	25	24	26	29	374314	308058	709968	445151	804418	810244	926049	762335	721284	748357	842674	630015	729268	479095	972866	870233	773934	826513	1.13585e+06	946820	84921.7	P51125	Cast		84921.7
191187.83;191187.83-2	Q9CWL2;Q9CWL2-2	Casz1	Zinc finger protein castor homolog 1;Isoform 2 of Zinc finger protein castor homolog 1	CASZ1_MOUSE	1	0	3	2	3	2	2	0	0	0	0	0	2	0	0	0	0	0	1	0	4460.91	NaN	24361.9	9515.2	17304.8	8493.34	9497.33	NaN	NaN	NaN	NaN	NaN	9185.12	NaN	NaN	NaN	NaN	NaN	4829.52	NaN	191188	Q9CWL2	Casz1		191188
59795.3	P24270	Cat	Catalase	CATA_MOUSE	20	22	24	25	23	24	23	24	22	23	22	23	24	22	23	24	23	25	25	24	962337	793710	2.33597e+06	2823272	2.08013e+06	1.81583e+06	2.30591e+06	1.66515e+06	1707990	1.79371e+06	2.14198e+06	1.86516e+06	1.88132e+06	1.42619e+06	2.45018e+06	2.44776e+06	2.26098e+06	2439720	3.26394e+06	2.68458e+06	59795.3	P24270	Cat		59795.3
113803	P0DP43	Catspere	Cation channel sperm-associated auxiliary subunit epsilon	CTSRE_MOUSE	0	0	1	0	0	1	0	0	0	0	1	0	0	0	1	0	0	0	0	0	NaN	NaN	59227.9	NaN	NaN	40505.2	NaN	NaN	NaN	NaN	38793.9	NaN	NaN	NaN	46196.3	NaN	NaN	NaN	NaN	NaN	113803	P0DP43	Catspere		113803
46763.9	Q63918	Cavin2	Caveolae-associated protein 2	CAVN2_MOUSE	0	0	0	2	0	0	1	0	0	0	0	0	0	0	0	0	0	3	3	4	NaN	NaN	NaN	76545.4	NaN	NaN	5060.17	NaN	NaN	NaN	NaN	NaN	NaN	NaN	NaN	NaN	NaN	94609.6	148105	116761	46763.9	Q63918	Cavin2		46763.9
68032.3	O54972	Cbfa2t3	Protein CBFA2T3	MTG16_MOUSE	0	0	1	1	2	1	1	1	3	2	3	2	3	2	3	2	1	3	2	2	NaN	NaN	11909.6	9082	18932.4	8548.94	10770.3	6192.28	29642.7	20612.7	32669.7	16387.9	25448.5	13465	33700.7	20737.9	16811.5	32249.3	28096.4	20225.4	68032.3	O54972	Cbfa2t3		68032.3
22030.5	Q08024	Cbfb	Core-binding factor subunit beta	PEBB_MOUSE	8	8	8	8	8	8	8	8	8	8	8	8	8	8	7	8	7	8	8	7	361509	271872	823206	610228	654181	570240	792976	564552	739617	819219	880988	623349	651673	535937	935961	940690	593651	597217	840947	717286	22030.5	Q08024	Cbfb		22030.5
21517.2	Q08024-2	Cbfb	Isoform 2 of Core-binding factor subunit beta	PEBB_MOUSE	1	1	1	1	2	1	1	1	1	0	1	2	1	1	2	1	1	1	0	1	31815	22039.6	63362.9	54391.9	50217.6	50881.1	64647.7	47734.1	49684	NaN	59733.6	46197.9	51471.3	39996.4	74220.1	65050.6	47658.9	34392.3	NaN	55110.8	21517.2	Q08024-2	Cbfb		21517.2
100564	P22682	Cbl	E3 ubiquitin-protein ligase CBL	CBL_MOUSE	18	16	22	21	20	21	21	21	22	21	21	21	22	21	22	21	14	16	20	18	312489	184653	794833	586938	594726	610550	689215	576960	701073	780497	881153	652929	738780	546038	967713	872394	296537	326969	556687	395064	100564	P22682	Cbl		100564
109092	Q3TTA7	Cblb	E3 ubiquitin-protein ligase CBL-B	CBLB_MOUSE	14	10	20	20	19	17	17	19	17	17	18	17	19	19	18	19	13	17	18	19	132388	104482	376068	282014	345612	298091	329608	269172	313506	343078	412469	298156	325877	272201	433917	443975	168043	304089	429773	390343	109092	Q3TTA7	Cblb		109092
54444.1	Q9JIY2	Cbll1	E3 ubiquitin-protein ligase Hakai	HAKAI_MOUSE	8	7	12	11	10	10	9	10	9	10	10	8	9	5	9	9	7	10	10	10	109096	69364	251242	162036	207497	194058	164466	142844	167860	220154	248594	134907	186178	99926.9	226528	223383	141649	192951	221670	189307	54444.1	Q9JIY2	Cbll1		54444.1
30641.2	P48758	Cbr1	Carbonyl reductase [NADPH] 1	CBR1_MOUSE	13	12	16	16	13	13	14	14	13	12	14	15	15	14	13	13	12	15	13	15	338894	265404	871789	530338	646187	566628	786934	533475	633093	623607	751375	634462	715195	498792	839694	743464	807252	869166	1.24016e+06	884462	30641.2	P48758	Cbr1		30641.2
25414.6	Q91VT4	Cbr4	3-oxoacyl-[acyl-carrier-protein] reductase	CBR4_MOUSE	6	6	6	6	6	6	6	6	6	6	6	6	6	5	7	7	6	6	6	6	91246.8	72590.3	216471	165012	155103	126514	156224	135602	149039	159713	190329	143880	160024	86620.4	251973	244412	175216	199145	274870	217531	25414.6	Q91VT4	Cbr4		25414.6
21417.8	P83917	Cbx1	Chromobox protein homolog 1	CBX1_MOUSE	7	6	8	8	9	6	9	8	7	9	7	9	9	8	8	8	7	8	10	8	481363	401832	967887	819587	754186	675885	800188	612840	782458	848136	890676	735290	695266	585164	867462	812522	1082996	1.10902e+06	1.30049e+06	1.20055e+06	21417.8	P83917	Cbx1		21417.8
20855.4	P23198	Cbx3	Chromobox protein homolog 3	CBX3_MOUSE	7	8	9	8	8	9	9	9	8	9	9	9	9	8	9	8	7	11	9	10	2554552	2.04373e+06	4.79889e+06	4.1437e+06	4.066e+06	3.53472e+06	4259520	3.28794e+06	4.32381e+06	4709336	5.0157e+06	3.8815e+06	4.08366e+06	2.96498e+06	4882301	4888623	5.98978e+06	6.69215e+06	8.28694e+06	6.59552e+06	20855.4	P23198	Cbx3		20855.4
60522.6	O55187	Cbx4	E3 SUMO-protein ligase CBX4	CBX4_MOUSE	4	0	7	6	6	6	6	7	9	10	9	7	7	5	8	10	3	9	8	8	29540.4	NaN	82288.3	61134.8	52493.4	62389.7	68100.4	65670.5	151830	171013	158238	74790.5	90498.5	52688.8	136908	185578	25857.5	91970.4	131773	87262.6	60522.6	O55187	Cbx4		60522.6
22186	Q61686	Cbx5	Chromobox protein homolog 5	CBX5_MOUSE	11	10	12	11	11	11	11	10	11	11	10	11	12	9	11	11	10	10	10	10	781502	582042	1.47326e+06	1.06295e+06	1.34846e+06	1.11392e+06	1.42856e+06	977293	1.60328e+06	1.7144e+06	1.90189e+06	1123366	1.36091e+06	890652	1766200	1.8383e+06	1252614	1.51047e+06	1.9516e+06	1.55504e+06	22186	Q61686	Cbx5		22186
44459.9	Q9DBY5	Cbx6	Chromobox protein homolog 6	CBX6_MOUSE	1	0	0	1	0	0	0	0	1	0	1	0	0	0	0	0	1	2	1	3	2949.336669921875	NaN	NaN	1628.1331787109375	NaN	NaN	NaN	NaN	4910.78	NaN	6515.56	NaN	NaN	NaN	NaN	NaN	5952.45	11524.4	9730.6	18719.2	44459.9	Q9DBY5	Cbx6		44459.9
18109.4	Q8VDS3	Cbx7	Chromobox protein homolog 7	CBX7_MOUSE	1	0	1	2	1	1	1	1	1	2	0	1	1	1	1	0	1	1	0	1	20260.6	NaN	42736.4	34148.6	24591.2	25020.2	29631.6	21137.5	30815.7	38364.4	NaN	29019.5	23695.8	23583.7	30612.5	NaN	30302.9	29640.7	NaN	32961.3	18109.4	Q8VDS3	Cbx7		18109.4
39860	Q9QXV1	Cbx8	Chromobox protein homolog 8	CBX8_MOUSE	0	0	3	3	0	2	0	0	0	0	0	0	2	0	0	0	5	8	7	8	NaN	NaN	40315.1	26785.9	NaN	15732.4	NaN	NaN	NaN	NaN	NaN	NaN	18154.2	NaN	NaN	NaN	59476.7	120593	121969	120153	39860	Q9QXV1	Cbx8		39860
103698	Q8K1A6	Cc2d1a	C2Coiled-coil and C2 domain-containing protein 1A	C2D1A_MOU	20	19	18	25	23	21	22	21	26	22	26	25	26	17	21	25	12	20	19	20	212064	174402	402008	490607	412839	349717	411768	326050	428888	465037	593144	513491	391300	265537	503095	575956	157813	232087	222958	239140	103698	Q8K1A6	Cc2d1a		103698
93091.3	Q8BRN9	Cc2d1b	C2Coiled-coil and C2 domain-containing protein 1B	C2D1B_MOU	21	22	24	24	23	24	24	25	23	24	24	24	26	23	23	23	20	24	25	23	406098	283898	848953	597949	762607	686839	876788	678932	717754	840227	922651	551334	745030	511672	973207	956711	555095	588192	893613	690368	93091.3	Q8BRN9	Cc2d1b		93091.3
132060.23;132060.23-3	Q8CH18;Q8CH18-3	Ccar1	Cell division cycle and apoptosis regulator protein 1;Isoform 3 of Cell division cycle and apoptosis regulator protein 1	CCAR1_MOUSE	26	26	28	26	26	28	26	28	29	30	28	29	29	26	26	27	24	29	29	27	925490	814414	2164232	1.62383e+06	1.52653e+06	1.55776e+06	1.70699e+06	1.33307e+06	1.69926e+06	1.96348e+06	2129335	1657618	1537783	1.13282e+06	2026113	1.95163e+06	1.9515e+06	1.98977e+06	2.72399e+06	2.17839e+06	132060	Q8CH18	Ccar1		132060
103002	Q8VDP4	Ccar2	Cell cycle and apoptosis regulator protein 2	CCAR2_MOUSE	33	31	33	34	35	35	35	32	33	35	34	34	35	33	33	34	33	40	35	37	1.35349e+06	1.03189e+06	3.03899e+06	2.59785e+06	2.26451e+06	2.24595e+06	2.3274e+06	1.76e+06	2251387	2.36249e+06	2.9259e+06	2284147	2.3394e+06	1.68607e+06	2.74252e+06	2699451	2.75514e+06	2.89208e+06	3.7645e+06	2.93675e+06	103002	Q8VDP4	Ccar2		103002
19742.6	Q8VE99	Ccdc115	Coiled-coil domain-containing protein 115	CC115_MOUSE	9	8	11	9	8	10	9	9	9	9	9	10	10	9	9	9	5	8	8	8	247616	185723	661571	493945	413966	409919	507213	361642	574514	601850	665351	567903	493545	391314	679646	676159	135353	204685	258031	196517	19742.6	Q8VE99	Ccdc115		19742.6
30427.4	Q6PB51	Ccdc117	Coiled-coil domain-containing protein 117	CC117_MOUSE	6	6	7	4	5	7	10	6	8	8	8	8	7	8	8	9	3	6	7	6	47150.2	32042.3	97034.2	44566.1	64940.7	79217.4	119171	55712.1	122777	151827	157673	92928.8	104946	95336	173837	152709	27263.9	57883.6	79498.7	71460.2	30427.4	Q6PB51	Ccdc117		30427.4
18891.4	Q8R344	Ccdc12	Coiled-coil domain-containing protein 12	CCD12_MOUSE	6	5	7	7	7	7	8	7	7	7	7	6	7	7	7	7	6	6	7	7	292887	231780	665887	504151	479824	439228	558039	384967	611129	655411	736757	327684	498516	394125	695176	669496	427692	397012	585645	488418	18891.4	Q8R344	Ccdc12		18891.4
25345.8	Q9D8X2	Ccdc124	Coiled-coil domain-containing protein 124	CC124_MOUSE	9	10	11	9	11	11	9	9	9	10	10	10	10	10	10	10	7	9	9	9	391768	351548	761806	516550	630682	650299	659920	558153	772690	810820	962776	719841	722291	594393	915192	894188	306034	384511	484335	335385	25345.8	Q9D8X2	Ccdc124		25345.8
30509	Q3TC33	Ccdc127	Coiled-coil domain-containing protein 127	CC127_MOUSE	6	6	7	7	6	6	8	6	7	8	7	7	7	5	6	7	5	8	7	6	87197.5	66334.4	192691	181381	79004.2	121263	144901	98067.4	150389	143857	171129	127630	115740	76329.4	152700	156879	106195	122987	175766	133852	30509	Q3TC33	Ccdc127		30509
26494.5	Q8C7V8	Ccdc134	Coiled-coil domain-containing protein 134	CC134_MOUSE	6	6	6	5	6	7	7	7	7	7	6	6	7	7	6	7	6	7	7	7	157113	102006	364019	288323	293922	244945	338120	256086	350910	344997	415915	264627	272080	205478	359722	376210	363817	361599	457547	387801	26494.5	Q8C7V8	Ccdc134		26494.5
32918	Q8R0K4	Ccdc137	Coiled-coil domain-containing protein 137	CC137_MOUSE	7	7	9	10	9	8	7	6	7	8	6	7	8	7	8	8	6	6	7	7	125067	128902	325112	263771	155215	242056	197736	103393	231263	280264	314502	180015	162011	139783	276873	282784	102576	108631	154202	112448	32918	Q8R0K4	Ccdc137		32918
11475.31;11475.31-2;11475.31-3	Q9D162;Q9D162-2;Q9D162-3	Ccdc167	Coiled-coil domain-containing protein 167;Isoform 2 of Coiled-coil domain-containing protein 167;Isoform 3 of Coiled-coil domain-containing protein 167	CC167_MOUSE	3	2	3	2	3	2	2	3	3	3	2	3	3	2	2	3	2	2	2	2	37714.8	12980.8	86152.3	39657.6	62301.6	38912.9	55401.2	66852.7	89271	97058.4	79730.6	47391.8	64625.3	42222.1	72117.8	105885	14982.6	23034.9	20260.9	27228.2	11475.3	Q9D162	Ccdc167		11475.3
53941.7	Q3U155	Ccdc174	Coiled-coil domain-containing protein 174	CC174_MOUSE	8	6	10	10	9	12	8	5	11	11	10	10	11	9	10	8	4	6	8	6	74544.5	49366.9	209543	138076	133208	159066	156380	79376.2	194616	181802	213936	142301	157770	107543	202575	188599	69368.6	85806.3	142733	108057	53941.7	Q3U155	Ccdc174		53941.7
70843.5	Q9JIG7	Ccdc22	Coiled-coil domain-containing protein 22	CCD22_MOUSE	21	19	23	20	23	22	23	23	24	23	23	22	23	21	23	23	20	22	22	23	256896	184971	589978	295810	525275	477927	595213	449379	555157	637051	662637	404607	526136	378592	724685	710534	313642	464017	601630	485581	70843.5	Q9JIG7	Ccdc22		70843.5
24479.9	Q78PG9	Ccdc25	Coiled-coil domain-containing protein 25	CCD25_MOUSE	6	4	7	7	8	7	7	7	8	7	8	8	8	5	7	7	4	6	7	5	174665	89659.1	312169	223879	281017	306635	371219	249547	394099	409507	432017	320711	309982	190656	366842	442271	162925	189529	281991	176396	24479.9	Q78PG9	Ccdc25		24479.9
25049	Q9CR29	Ccdc43	Coiled-coil domain-containing protein 43	CCD43_MOUSE	6	4	3	3	6	3	6	6	6	5	6	3	6	3	6	5	1	5	4	4	75032	48274.9	80659.2	64982.1	78731.1	64101.6	108434	97957.7	128426	135283	149600	50457	103588	70670.7	140482	139403	28302.2	79643.9	112099	81594	25049	Q9CR29	Ccdc43		25049
55843.8	Q9D024	Ccdc47	PAT complex subunit CCDC47	CCD47_MOUSE	15	12	18	18	14	15	15	15	13	15	17	16	17	16	15	14	11	14	14	13	482076	351402	991562	828670	757708	715555	794473	592707	713363	769048	956268	717381	670401	522910	879724	830927	431490	589223	694782	571774	55843.8	Q9D024	Ccdc47		55843.8
35321.49;35321.49-3	Q810U5;Q810U5-3	Ccdc50	Coiled-coil domain-containing protein 50;Isoform 3 of Coiled-coil domain-containing protein 50	CCD50_MOUSE	9	10	10	9	10	11	11	11	11	10	10	11	10	10	10	10	8	8	7	9	398616	315721	762025	507254	703841	695307	815867	576374	681322	706622	836219	599949	604606	521856	800441	742513	370756	306922	439394	393827	35321.5	Q810U5	Ccdc50		35321.5
45132.49;45132.49-2	Q3URS9;Q3URS9-2	Ccdc51	Mitochondrial potassium channel;Isoform 2 of Mitochondrial potassium channel	MITOK_MOUSE	8	9	10	10	9	8	7	7	8	8	9	8	9	8	9	9	8	10	9	9	109583	106615	248123	244321	152136	138072	181757	111464	182240	196814	249558	176938	146479	118884	225150	222849	127561	171248	179817	166699	45132.5	Q3URS9	Ccdc51		45132.5
28033.8	Q8R2N0	Ccdc59	Thyroid transcription factor 1-associated protein 26	TAP26_MOUSE	3	2	4	4	2	4	4	3	4	4	3	3	4	3	3	3	2	4	3	2	37681.8	30392	76822.5	70595.2	50509.7	68803.6	60011.7	59287.5	88558.2	93970.1	101473	70616.7	64428.7	41370.1	98552.1	79533.2	36264.9	46461.1	45768.2	38571.4	28033.8	Q8R2N0	Ccdc59		28033.8
52938.8	D3YZP9	Ccdc6	Coiled-coil domain-containing protein 6	CCDC6_MOUSE	10	6	16	12	16	12	15	13	15	18	14	12	17	11	16	17	10	12	12	8	80934	36625.4	238394	94888.4	198896	148891	252917	169718	273499	315508	272877	133257	281123	119765	318360	325754	118938	157176	182269	110598	52938.8	D3YZP9	Ccdc6		52938.8
57368.2	Q3UJV1	Ccdc61	Centrosomal protein CCDC61	CCD61_MOUSE	2	0	2	1	3	1	2	1	3	2	3	0	3	3	2	3	0	3	2	3	6047.62	NaN	15868.6	6001.08	28367.6	10508	20685.7	6731.74	14723.6	12421.4	25609.2	NaN	43532.9	25439.8	15981.6	18489.4	NaN	24503.8	20538.5	19691.1	57368.2	Q3UJV1	Ccdc61		57368.2
23296.2	Q3TCJ8	Ccdc69	Coiled-coil domain-containing protein 69	CCD69_MOUSE	0	0	4	3	0	2	2	2	3	2	5	0	2	0	5	3	2	3	4	5	NaN	NaN	21598.8	13877.6	NaN	11151.7	9772.77	7705.42	18120.2	12149.5	23495.5	NaN	12611.2	NaN	27355.2	24549.3	13257.9	20615.9	39999	18166.5	23296.2	Q3TCJ8	Ccdc69		23296.2
46009.6	Q8VEG0	Ccdc71	Coiled-coil domain-containing protein 71	CCD71_MOUSE	2	1	5	4	3	4	4	3	6	4	5	4	3	2	3	5	3	5	6	6	8121.55	3030.462646484375	50630.1	49681.8	19450	34326.2	25777.2	16110	50750.1	27438.8	55821.6	24986.5	14434.3	9663.24	28009.7	43348.1	23935.2	43376.5	63415.1	50078.4	46009.6	Q8VEG0	Ccdc71		46009.6
24212.7	E9Q4T4	Ccdc71l	E9Q4Coiled-coil domain containing 71 like	E9Q4T4_M	4	3	7	8	7	6	5	6	4	7	5	7	6	5	4	6	5	4	8	6	34712.7	22592.8	109179	211762	104465	107219	90027.6	83602.5	67553.2	88672.6	91090.9	142321	75763.7	44859.8	67610.9	80532.5	94090.4	75138	129118	125301	24212.7	E9Q4T4	Ccdc71l		24212.7
57569.03;57569.03-2	Q9CZH8;Q9CZH8-2	Ccdc77	Coiled-coil domain-containing protein 77;Isoform 2 of Coiled-coil domain-containing protein 77	CCD77_MOUSE	3	1	4	3	3	3	4	4	3	6	6	3	6	0	5	3	0	7	7	4	9228.01	880.837	40253.1	19028.7	14287.1	18524.4	29744.7	23174.5	24718.8	50176.7	49196.4	15994.5	42753.2	NaN	42331.4	17594.2	NaN	48851.8	67663.5	29310.2	57569	Q9CZH8	Ccdc77		57569
46486.8	Q9JJ89	Ccdc86	Coiled-coil domain-containing protein 86	CCD86_MOUSE	11	12	13	13	11	13	12	11	12	12	12	12	13	13	12	11	11	11	12	11	323966	296590	676089	524487	476532	511769	560520	395791	715136	785056	857906	529942	589502	447799	747782	714598	227549	239056	322946	280351	46486.8	Q9JJ89	Ccdc86		46486.8
166608.45;166608.45-2	Q4QRL3;Q4QRL3-2	Ccdc88b	Coiled-coil domain-containing protein 88B;Isoform 2 of Coiled-coil domain-containing protein 88B	CC88B_MOUSE	5	5	11	9	12	11	14	17	11	13	14	15	15	11	16	17	0	8	12	8	11577.6	38172.9	65356.4	99950.6	73069.5	83417.3	142482	195243	282996	126956	106268	141773	93284.6	66143.4	363215	335415	NaN	199551	142977	65871.1	166608	Q4QRL3	Ccdc88b		166608
226534.78;226534.78-2	Q6VGS5;Q6VGS5-2	Ccdc88c	Protein Daple;Isoform 2 of Protein Daple	DAPLE_MOUSE	16	15	26	17	33	24	31	27	26	30	32	26	30	18	26	35	11	23	24	23	73499.7	71456.2	359460	138421	355960	245701	384530	240464	298979	360133	409494	255656	301659	149048	382221	437379	86955.1	167439	259253	240016	226535	Q6VGS5	Ccdc88c		226535
61445.4	Q8VC31	Ccdc9	Coiled-coil domain-containing protein 9	CCDC9_MOUSE	10	11	11	10	12	12	13	11	12	11	12	12	11	10	13	12	8	10	10	12	251080	249728	538384	406167	418822	392654	534603	412907	475857	500784	551302	474884	428074	334935	594747	570516	298902	322310	369125	344237	61445.4	Q8VC31	Ccdc9		61445.4
29596.8	Q8C3X2	Ccdc90b	Coiled-coil domain-containing protein 90B, mitochondrial	CC90B_MOUSE	5	7	8	7	8	6	7	6	5	8	7	5	5	7	7	7	5	7	7	7	91291.1	98649	266795	163382	222274	146361	193112	149759	164453	221975	224490	95777.5	133818	132906	223560	214462	119535	173552	241725	197065	29596.8	Q8C3X2	Ccdc90b		29596.8
50006.8	Q9D8L5	Ccdc91	Coiled-coil domain-containing protein 91	CCD91_MOUSE	1	0	0	0	1	1	1	1	1	1	1	0	0	1	1	1	1	1	1	0	2335.325439453125	NaN	NaN	NaN	4302.77	3555.73	6410.38	3807.87	5322.56	6579.24	9947.1	NaN	NaN	3566.950439453125	7220.29	8099.82	3496.57	3663.5	4890.02	NaN	50006.8	Q9D8L5	Ccdc91		50006.8
72603	Q7TQK5	Ccdc93	Coiled-coil domain-containing protein 93	CCD93_MOUSE	20	16	24	23	23	22	24	24	26	24	22	22	22	21	22	25	23	25	23	23	247096	136618	517782	359122	443746	389805	534911	367113	538634	467375	518582	433822	407202	341091	584366	562168	479986	509701	634741	533159	72603	Q7TQK5	Ccdc93		72603
38724.3	Q9DBT3	Ccdc97	Coiled-coil domain-containing protein 97	CCD97_MOUSE	5	0	6	7	8	9	8	7	8	8	9	8	9	8	10	9	2	6	6	4	41087.3	NaN	70596.4	77675.2	73294.7	72242.6	87463.7	54408	98838.3	99993	122220	103032	120112	73882.9	137306	122910	5589.57	40577.2	64584.9	26279.5	38724.3	Q9DBT3	Ccdc97		38724.3
87105.4	Q8K2I2	Cchcr1	Coiled-coil alpha-helical rod protein 1	CCHCR_MOUSE	0	0	0	0	0	1	1	0	0	1	0	0	0	0	0	0	0	0	0	0	NaN	NaN	NaN	NaN	NaN	2824.671630859375	5064.48	NaN	NaN	4039.953857421875	NaN	NaN	NaN	NaN	NaN	NaN	NaN	NaN	NaN	NaN	87105.4	Q8K2I2	Cchcr1		87105.4
10302.3	O88430	Ccl22	C-C motif chemokine 22	CCL22_MOUSE	0	0	2	2	0	2	0	2	2	2	2	2	0	0	1	0	0	0	0	0	NaN	NaN	93708	79292.1	NaN	41611.7	NaN	43791	46542.8	37158.2	57747.6	43119.9	NaN	NaN	14701.5	NaN	NaN	NaN	NaN	NaN	10302.3	O88430	Ccl22		10302.3
48248	Q8K2Y9-2	Ccm2	Isoform 2 of Cerebral cavernous malformations protein 2 homolog	CCM2_MOUSE	10	9	11	11	12	12	13	11	9	12	14	10	13	9	14	13	11	15	15	15	87909.7	63237.7	217023	147964	172517	178973	242909	138577	158114	229776	241667	156057	228099	115322	247445	231124	186977	275158	396428	312809	48248	Q8K2Y9-2	Ccm2		48248
47269.1	P51943	Ccna2	Cyclin-A2	CCNA2_MOUSE	2	0	1	0	2	3	4	4	3	4	4	0	5	4	4	4	0	0	0	0	22938.6	NaN	21633.4	NaN	36194.6	52077	83266.1	72140.2	108642	134580	84116.6	NaN	131738	51639.1	154738	163516	NaN	NaN	NaN	NaN	47269.1	P51943	Ccna2		47269.1
48051.9	P24860	Ccnb1	G2/mitotic-specific cyclin-B1	CCNB1_MOUSE	0	0	5	0	4	3	4	4	5	5	5	0	8	2	7	6	0	0	0	0	NaN	NaN	40634.8	NaN	32599.3	27996	46441.2	45374.4	110018	113959	151400	NaN	145016	30938	186817	193581	NaN	NaN	NaN	NaN	48051.9	P24860	Ccnb1		48051.9
158969.2;158969.2-2	Q810T2;Q810T2-2	Ccnb3	G2/mitotic-specific cyclin-B3;Isoform 2 of G2/mitotic-specific cyclin-B3	CCNB3_MOUSE	0	1	0	0	0	1	0	0	0	0	1	0	0	0	0	0	0	0	0	0	NaN	10691.2	NaN	NaN	NaN	6759.84	NaN	NaN	NaN	NaN	8280.51	NaN	NaN	NaN	NaN	NaN	NaN	NaN	NaN	NaN	158969	Q810T2	Ccnb3		158969
33240.7	Q62447	Ccnc	Cyclin-C	CCNC_MOUSE	4	4	2	4	4	4	4	3	4	4	4	4	3	2	4	4	3	4	4	4	50531.3	38506	56070.7	54240.5	79192.4	67087.9	87241.9	45700.3	91872.7	92046.1	108182	51835.3	52973	33530.5	100246	103960	44115.7	58272.7	66533	60669.3	33240.7	Q62447	Ccnc		33240.7
32897.2	P30280	Ccnd2	G1/S-specific cyclin-D2	CCND2_MOUSE	0	0	4	7	0	6	5	6	8	10	9	10	7	6	7	6	0	0	0	0	NaN	NaN	16688.1	57787.2	NaN	41705.4	26822.9	37360.7	92071.6	149911	144514	240246	104365	60333.9	125953	72031.5	NaN	NaN	NaN	NaN	32897.2	P30280	Ccnd2		32897.2
32410.7	P30282	Ccnd3	G1/S-specific cyclin-D3	CCND3_MOUSE	0	0	0	0	3	2	3	3	3	4	2	0	4	3	4	3	0	0	0	0	NaN	NaN	NaN	NaN	14418.7	15069.5	18711.8	22945.4	20280.8	41691.4	25211.6	NaN	44237.9	20157.6	63186.4	35626.7	NaN	NaN	NaN	NaN	32410.7	P30282	Ccnd3		32410.7
33902.6	P51945	Ccng1	Cyclin-G1	CCNG1_MOUSE	0	0	0	0	0	0	0	0	0	0	0	3	0	0	0	0	0	0	0	0	NaN	NaN	NaN	NaN	NaN	NaN	NaN	NaN	NaN	NaN	NaN	27360.3	NaN	NaN	NaN	NaN	NaN	NaN	NaN	NaN	33902.6	P51945	Ccng1		33902.6
37506.3	Q61458	Ccnh	Cyclin-H	CCNH_MOUSE	12	9	13	12	12	13	11	12	11	12	13	11	12	11	14	10	9	10	12	11	171699	140435	340001	232768	309575	290098	294360	268394	406711	431651	470515	267150	334458	224023	484699	364282	102282	152271	212812	178324	37506.3	Q61458	Ccnh		37506.3
61363.3	O88874	Ccnk	Cyclin-K	CCNK_MOUSE	10	13	16	12	13	14	14	15	14	16	13	12	14	16	15	14	11	14	12	15	210211	428250	712518	449849	880193	759630	1.02651e+06	728938	986238	1.10696e+06	1208430	695916	774561	635910	1.24741e+06	1.44153e+06	584117	629548	1.00827e+06	861699	61363.3	O88874	Ccnk		61363.3
60133.2	Q52KE7	Ccnl1	Cyclin-L1	CCNL1_MOUSE	5	5	5	4	4	5	6	6	5	5	5	5	6	5	5	5	3	5	6	5	50998.7	42313.3	87172.3	38774.8	59373.2	73936.1	93668.9	79874.4	88957.5	93179.3	99972.5	81139.8	59002.3	49551.3	88727.4	94049.6	44110.5	49674.4	65155.8	71342.5	60133.2	Q52KE7	Ccnl1		60133.2
58005.3	Q9JJA7	Ccnl2	Cyclin-L2	CCNL2_MOUSE	4	4	9	8	5	7	5	5	6	7	7	6	9	7	6	6	4	5	5	7	74626.3	65059.2	288977	136225	163305	142385	164159	115822	229096	236270	242398	132059	211486	105706	224253	198485	95354.7	113434	167501	126456	58005.3	Q9JJA7	Ccnl2		58005.3
24006.2	Q9JJA7-3	Ccnl2	Isoform 3 of Cyclin-L2	CCNL2_MOUSE	0	0	0	0	0	0	0	0	0	0	0	0	0	0	1	0	0	0	0	0	NaN	NaN	NaN	NaN	NaN	NaN	NaN	NaN	NaN	NaN	NaN	NaN	NaN	NaN	7330.9	NaN	NaN	NaN	NaN	NaN	24006.2	Q9JJA7-3	Ccnl2		24006.2
80597.7	Q9QWV9	Ccnt1	Cyclin-T1	CCNT1_MOUSE	12	11	15	13	13	14	15	14	14	14	14	14	14	12	13	15	10	14	15	13	186735	160184	455263	283101	273528	335747	354362	331948	398755	433562	558924	343082	341557	230359	448384	455254	249454	266048	378195	262912	80597.7	Q9QWV9	Ccnt1		80597.7
39394.8	Q8BGU5	Ccny	Cyclin-Y	CCNY_MOUSE	4	8	6	6	7	7	8	6	9	7	9	7	6	6	9	7	3	9	8	7	47019.4	47157.4	112666	93617.5	92194.3	90433.6	121985	82049.2	104354	110436	160579	87852.2	83247.7	61055.4	137161	122789	39847.3	107224	152745	85433.2	39394.8	Q8BGU5	Ccny		39394.8
111139	Q7TSH4	Ccp110	Centriolar coiled-coil protein of 110 kDa	CP110_MOUSE	0	3	4	5	0	5	3	4	6	3	6	1	6	0	6	0	0	3	0	0	NaN	16050.9	30594.2	30790.3	NaN	24992.9	35770.4	32099.3	45341.3	39841.8	70842.1	11178.5	42590.7	NaN	59524.1	NaN	NaN	18619.1	NaN	NaN	111139	Q7TSH4	Ccp110		111139
42102.7	O54689	Ccr6	C-C chemokine receptor type 6	CCR6_MOUSE	0	0	0	0	0	0	0	1	0	0	0	0	2	0	0	0	2	2	2	2	NaN	NaN	NaN	NaN	NaN	NaN	NaN	3848.048583984375	NaN	NaN	NaN	NaN	12074.6	NaN	NaN	NaN	34510.2	35466.2	41294.4	39656.7	42102.7	O54689	Ccr6		42102.7
42855.9	P47774	Ccr7	C-C chemokine receptor type 7	CCR7_MOUSE	1	2	1	2	2	0	1	2	0	1	0	1	1	1	0	1	0	0	0	0	33815	28123.1	68155.7	61367.7	58465	NaN	36617	39751.6	NaN	35222.4	NaN	13473.6	36318.7	23698.5	NaN	48827.7	NaN	NaN	NaN	NaN	42855.9	P47774	Ccr7		42855.9
28911.6	Q9WU84	Ccs	Copper chaperone for superoxide dismutase	CCS_MOUSE	0	0	5	5	5	6	6	7	6	6	6	4	7	6	6	7	0	5	5	4	NaN	NaN	96161.1	90920.3	98913.2	108629	155424	145088	151825	140298	159140	62240.6	145533	101331	189982	196533	NaN	69858.7	107217	50438.2	28911.6	Q9WU84	Ccs		28911.6
28378.6	Q8QZT2	Ccsap	Centriole, cilia and spindle-associated protein	CCSAP_MOUSE	0	2	2	2	1	1	2	2	0	2	1	2	1	2	2	2	2	1	1	2	NaN	14233.3	28738.6	30395.8	7576.25	7183.51	13103.3	26806.3	NaN	9154.01	9279.89	29273.4	5625.02	24046.8	30917	21825.5	28841	10624.1	13172.5	29201.2	28378.6	Q8QZT2	Ccsap		28378.6
57477.2	P80314	Cct2	T-complex protein 1 subunit beta	TCPB_MOUSE	30	31	33	32	32	33	33	33	32	32	33	34	34	32	32	32	28	32	32	30	8.07773e+06	6066687	15696829	9917175	13824183	13098960	16519951	11741575	18335594	20186250	23384912	14467926	15969075	11229676	22133014	20753352	5.17162e+06	6201887	9641254	7.13889e+06	57477.2	P80314	Cct2		57477.2
60630	P80318	Cct3	T-complex protein 1 subunit gamma	TCPG_MOUSE	35	34	43	42	38	39	40	38	40	41	39	37	41	35	39	39	33	37	34	34	8395768	6.14275e+06	16298538	8894967	13801519	11625645	16203674	12131043	18474156	19489920	21528286	11935170	16085015	10482906	20834660	20026052	6649048	7231636	10166202	7.92717e+06	60630	P80318	Cct3		60630
58066.4	P80315	Cct4	T-complex protein 1 subunit delta	TCPD_MOUSE	31	32	36	36	33	35	35	31	35	34	34	35	36	35	33	33	30	33	33	29	8927774	6736510	18035282	10524759	14911962	13384883	17606108	12855681	19638610	20455422	23219450	13658093	17595074	12818927	22956614	21705504	7716397	7.36646e+06	10630570	8024579	58066.4	P80315	Cct4		58066.4
59624.1	P80316	Cct5	T-complex protein 1 subunit epsilon	TCPE_MOUSE	34	34	36	35	36	38	34	36	36	37	36	37	34	34	37	33	30	34	33	33	5695861	4.18081e+06	11528004	6009863	9761750	8.25067e+06	11258896	8411561	12948813	13817307	15689793	8419780	11121325	7.12084e+06	15254687	14837787	4.83056e+06	4949786	7163310	5.37726e+06	59624.1	P80316	Cct5		59624.1
58004.3	P80317	Cct6a	T-complex protein 1 subunit zeta	TCPZ_MOUSE	24	25	27	26	25	26	25	26	24	26	25	25	24	25	24	25	21	23	22	22	4.87616e+06	3.66286e+06	9924828	5.66187e+06	7835795	6579244	9288040	7.02453e+06	10273908	10718656	12119985	6600092	8954551	6245455	11634382	11679069	4530565	4.23497e+06	5975815	4.66091e+06	58004.3	P80317	Cct6a		58004.3
59652.2	P80313	Cct7	T-complex protein 1 subunit eta	TCPH_MOUSE	30	30	35	34	31	31	31	30	31	30	32	30	30	30	31	31	27	29	30	31	5522902	3944187	10591790	5.393e+06	8899159	7.36907e+06	10709148	8055127	11758278	12493772	13878219	7023251	9907476	6778838	13647664	13154144	4373908	4576989	6346455	4.86919e+06	59652.2	P80313	Cct7		59652.2
59555.5	P42932	Cct8	T-complex protein 1 subunit theta	TCPQ_MOUSE	37	40	42	40	42	42	41	40	44	44	43	42	43	42	42	43	32	40	37	38	8.01185e+06	6008833	18343804	10443467	14007606	13015615	17272074	12097290	19136158	20244144	22784676	13114928	16853536	12069570	20416742	20588568	6667311	6.95793e+06	9675951	7.41279e+06	59555.5	P42932	Cct8		59555.5
55504.7	Q8C1Y8	Ccz1	Vacuolar fusion protein CCZ1 homolog	CCZ1_MOUSE	15	11	18	16	18	17	17	18	18	17	18	18	17	19	18	19	12	18	17	17	165859	105297	360990	215186	314696	295676	391228	289718	439742	464827	521507	340206	352541	296093	483670	508285	188950	283401	409620	298020	55504.7	Q8C1Y8	Ccz1		55504.7
74302.4	Q62192	Cd180	CD180 antigen	CD180_MOUSE	16	16	17	17	17	17	17	17	18	17	16	17	18	16	16	17	13	17	17	16	825356	553256	1.57884e+06	1.3907e+06	1.36647e+06	1.22028e+06	1.38583e+06	1.01025e+06	1443798	1.51992e+06	1.85618e+06	1.44115e+06	1.31111e+06	919186	1.81879e+06	1690412	1.24221e+06	1.63551e+06	2.0785e+06	1.6556e+06	74302.4	Q62192	Cd180		74302.4
60149.2	P25918	Cd19	B-lymphocyte antigen CD19	CD19_MOUSE	8	9	12	12	9	11	10	8	9	9	9	10	11	10	9	9	6	6	8	7	392597	299472	1.15711e+06	768910	727909	644288	783649	487561	644856	809264	927176	615939	894972	584809	904215	838928	305935	170622	403407	306671	60149.2	P25918	Cd19		60149.2
38554.1	P11609	Cd1d1	CD1Antigen-presenting glycoprotein CD1d1	CD1D1_MO	3	2	5	5	4	4	4	2	4	3	3	3	5	4	3	3	6	5	6	5	99768	21305.7	307035	242979	154948	129509	184235	93659.1	198525	181304	91280.2	109088	124789	143720	192074	177508	261894	276877	377013	292982	38554.1	P11609	Cd1d1		38554.1
38414.6	P08920	Cd2	T-cell surface antigen CD2	CD2_MOUSE	4	3	4	4	4	4	3	4	4	4	4	4	4	4	4	3	4	4	4	4	54943.6	34456.8	99115.4	102232	108481	71755.2	75960.5	73685.2	98142.6	100700	116905	95199.5	85711.9	57453.2	109378	112269	129301	136579	174189	139091	38414.6	P08920	Cd2		38414.6
31256.1	O54901	Cd200	OX-2 membrane glycoprotein	OX2G_MOUSE	4	3	5	4	4	5	5	3	3	2	4	5	5	5	3	2	3	3	4	4	39436.6	25193.2	132812	71043.4	56343.2	93546.7	91116.1	49715.4	54301.3	54578.2	74875.1	106254	72254.7	51890.3	84119.3	52171.9	91789.7	58199.5	129600	33953.8	31256.1	O54901	Cd200		31256.1
97180.8	P35329	Cd22	B-cell receptor CD22	CD22_MOUSE	22	20	25	25	23	22	25	25	24	23	24	24	23	21	23	23	22	24	24	24	1.20568e+06	989352	2.66085e+06	2093647	2.22306e+06	1.83084e+06	2367831	1.60235e+06	1.97346e+06	2.10812e+06	2455809	1790174	1.99948e+06	1.40895e+06	2.50621e+06	2500529	2.24299e+06	2395295	3.18596e+06	2.58836e+06	97180.8	P35329	Cd22		97180.8
32780.5	Q9EP73	Cd274	PD1Programmed cell death 1 ligand 1	PD1L1_MO	0	1	1	1	1	1	1	1	1	1	1	1	1	1	1	1	1	1	1	1	NaN	7134.58	31798.5	27743.6	18471.3	16089.3	22598.5	14332.9	22155.8	24488.9	33010.8	22181.4	10555.1	5493.24	19484.9	22249.8	12936.4	10781.8	20294.6	10916	32780.5	Q9EP73	Cd274		32780.5
70449.9	Q9JLQ0	Cd2ap	CD2-associated protein	CD2AP_MOUSE	28	27	31	26	30	28	29	31	28	28	26	28	30	27	28	29	24	27	25	29	817254	619830	1656372	1.09526e+06	1.33112e+06	1187954	1511248	1.09958e+06	1.43339e+06	1.4903e+06	1.65153e+06	1.23027e+06	1.36759e+06	975176	1.74974e+06	1.69473e+06	1.06208e+06	1.11647e+06	1.66815e+06	1.3991e+06	70449.9	Q9JLQ0	Cd2ap		70449.9
37694.4	Q9CWK3	Cd2bp2	CD2CD2 antigen cytoplasmic tail-binding protein 2	CD2B2_MO	10	8	12	11	12	11	11	11	12	11	12	11	13	11	12	11	9	10	10	10	314561	225560	628209	429733	574743	480977	596097	445703	658523	697947	806371	498782	642107	435576	848863	730174	326040	310019	367801	334124	37694.4	Q9CWK3	Cd2bp2		37694.4
52698	Q08857	Cd36	Platelet glycoprotein 4	CD36_MOUSE	9	9	10	10	9	9	9	9	9	9	9	9	10	10	9	8	7	8	8	9	545628	430944	1.28979e+06	2.23672e+06	553290	828316	691277	365078	1.5176e+06	1.56214e+06	1886742	2.24685e+06	1.04133e+06	1.02323e+06	1.34886e+06	1.06601e+06	178479	211056	246026	253268	52698	Q08857	Cd36		52698
31852.4	Q61470	Cd37	Leukocyte antigen CD37	CD37_MOUSE	8	9	8	9	9	9	9	9	8	9	9	9	9	9	9	9	9	9	9	9	681332	582930	1.61782e+06	1.10261e+06	1377723	1.24545e+06	1.52625e+06	1.14674e+06	1.3079e+06	1.43148e+06	1533693	1.1118e+06	1.37505e+06	1.00149e+06	1.66216e+06	1.73974e+06	1.01502e+06	1.03986e+06	1.22432e+06	1.02633e+06	31852.4	Q61470	Cd37		31852.4
34407.8	P56528	Cd38	ADP-ribosyl cyclase/cyclic ADP-ribose hydrolase 1	CD38_MOUSE	11	10	13	12	11	11	11	11	10	11	11	12	12	11	12	11	9	12	12	12	450191	356918	1.09022e+06	1.06214e+06	784989	707611	838413	578870	609527	725973	828743	844462	701192	544264	867943	868979	794892	1168722	1.51831e+06	1.29181e+06	34407.8	P56528	Cd38		34407.8
32092.8	P27512	Cd40	Tumor necrosis factor receptor superfamily member 5	TNR5_MOUSE	12	12	15	14	14	14	13	14	13	14	14	14	14	13	14	14	11	12	12	11	553936	466817	1.24555e+06	1.30618e+06	970199	1025214	1083563	780177	1.16732e+06	1.33491e+06	1565081	1.41167e+06	980840	863581	1.42076e+06	1196199	282258	274479	297509	240515	32092.8	P27512	Cd40		32092.8
85617.14;85617.14-10;85617.14-11;85617.14-2;85617.14-3;85617.14-4;85617.14-5;85617.14-6;85617.14-7;85617.14-8;85617.14-9	P15379;P15379-10;P15379-11;P15379-2;P15379-3;P15379-4;P15379-5;P15379-6;P15379-7;P15379-8;P15379-9	Cd44	CD44 antigen;Isoform 8 of CD44 antigen;Isoform 9 of CD44 antigen;Isoform 13 of CD44 antigen;Isoform 12 of CD44 antigen;Isoform 4 of CD44 antigen;Isoform 6 of CD44 antigen;Isoform 7 of CD44 antigen;Isoform 2 of CD44 antigen;Isoform 3 of CD44 antigen;Isoform 5 of CD44 antigen	CD44_MOUSE	9	9	9	9	9	8	9	9	9	8	9	8	8	8	8	8	4	7	7	7	1680073	1.29591e+06	3.48819e+06	2.55021e+06	2.25059e+06	1.98416e+06	2.54714e+06	1.93912e+06	2.48894e+06	2.77052e+06	3.42745e+06	2.33644e+06	1.88726e+06	1.3327e+06	2708206	2769724	156251	258598	284872	243618	85617.1	P15379	Cd44		85617.1
35316.9	Q61735-2	Cd47	Isoform 2 of Leukocyte surface antigen CD47	CD47_MOUSE	2	2	2	2	2	2	2	2	2	2	2	2	2	2	2	2	2	2	2	2	21065.5	20880.2	50221.6	43763.5	50489.7	39331.1	49667	28808	40479.4	38477.4	46792.2	47496.1	40589.8	32292.5	44816.9	46636.4	34776.2	37175.9	44013.4	39193.2	35316.9	Q61735-2	Cd47		35316.9
33097.5	Q61735	Cd47	Leukocyte surface antigen CD47	CD47_MOUSE	7	6	6	7	7	7	6	7	6	6	7	7	6	6	7	6	6	6	7	7	361597	264069	722591	663398	709140	591007	669491	674991	518082	552047	671953	542852	442210	387974	709322	701059	497464	600759	805682	681992	33097.5	Q61735	Cd47		33097.5
27383.4	P18181	Cd48	CD48 antigen	CD48_MOUSE	7	7	7	7	7	7	7	8	7	7	7	7	7	8	8	7	7	7	7	7	518684	444049	887284	702716	939552	883891	1.04999e+06	742867	990090	1.09651e+06	1.21691e+06	823911	955420	740471	1.28557e+06	1.30964e+06	468559	683333	834640	650796	27383.4	P18181	Cd48		27383.4
53849.2	P13379	Cd5	T-cell surface glycoprotein CD5	CD5_MOUSE	0	0	0	0	0	0	0	0	0	1	0	2	0	0	0	0	0	1	0	1	NaN	NaN	NaN	NaN	NaN	NaN	NaN	NaN	NaN	8003.46	NaN	13707.8	NaN	NaN	NaN	NaN	NaN	10990.1	NaN	12393.8	53849.2	P13379	Cd5		53849.2
24163.8	Q61451	Cd53	Leukocyte surface antigen CD53	CD53_MOUSE	1	1	1	1	1	1	0	1	1	1	1	1	1	1	1	1	1	1	1	0	97576.7	61621.5	280774	282799	207820	146912	NaN	137841	151732	178592	209367	197604	152394	139940	232674	242941	108549	98066.2	132490	NaN	24163.8	Q61451	Cd53		24163.8
42617.8	Q61475	Cd55	Complement decay-accelerating factor, GPI-anchored	DAF1_MOUSE	4	3	6	6	7	7	5	6	4	3	4	5	4	3	4	4	4	5	5	5	64653.5	58016.3	227186	179684	160555	140800	141467	134640	89918.7	95773	113342	119295	83640.2	58600.8	83776.5	103444	40989.2	148518	162049	130092	42617.8	Q61475	Cd55		42617.8
22517.3	P37217	Cd69	Early activation antigen CD69	CD69_MOUSE	7	8	10	9	9	8	8	9	8	9	9	8	9	7	9	9	0	0	0	0	455662	354515	1.00982e+06	679908	830525	592487	761997	630187	479130	631792	743842	425191	514020	348841	696966	651431	NaN	NaN	NaN	NaN	22517.3	P37217	Cd69		22517.3
40347.5	P21855	Cd72	B-cell differentiation antigen CD72	CD72_MOUSE	10	10	12	12	11	13	11	12	11	11	11	12	12	12	13	9	8	10	10	9	319571	254976	702512	720630	473305	530108	473768	353269	494661	520428	559451	538330	587547	511249	663538	536449	237807	280177	327320	234828	40347.5	P21855	Cd72		40347.5
31557.4	P04441	Cd74	H-2 class II histocompatibility antigen gamma chain	HG2A_MOUSE	14	14	17	15	16	17	16	15	14	15	17	15	18	14	15	16	12	14	14	13	13468258	12014620	31772402	20304468	15581203	12405811	16882730	13965509	11417896	12785576	14637531	13376720	11559297	7.11701e+06	14029185	14692337	8377836	11344631	12152404	10903657	31557.4	P04441	Cd74		31557.4
24454.4	P04441-2	Cd74	Isoform Short of H-2 class II histocompatibility antigen gamma chain	HG2A_MOUSE	2	2	2	2	2	2	2	2	2	2	2	2	2	2	2	2	2	2	2	2	1.63001e+06	1.57514e+06	1.96274e+06	1222439	1.79765e+06	1.44597e+06	1.91001e+06	1.58578e+06	1.49483e+06	1.5946e+06	1.835e+06	1.6086e+06	1.30564e+06	930826	1.8636e+06	2.0028e+06	1.27195e+06	1.5846e+06	1.88915e+06	1.58962e+06	24454.4	P04441-2	Cd74		24454.4
24583.1	P11911	Cd79a	B-cell antigen receptor complex-associated protein alpha chain	CD79A_MOUSE	5	4	5	5	6	5	6	6	5	6	6	5	6	4	6	6	5	7	6	6	805981	502824	1.78546e+06	1.1544e+06	1645622	1.46754e+06	1.7542e+06	1.37781e+06	1.30205e+06	1.49696e+06	1.57653e+06	1.12566e+06	1584283	909690	1.87399e+06	2.00562e+06	1.79752e+06	2.09127e+06	2.37503e+06	1.80838e+06	24583.1	P11911	Cd79a		24583.1
25726.4	P15530	Cd79b	B-cell antigen receptor complex-associated protein beta chain	CD79B_MOUSE	4	4	4	3	4	4	4	4	4	4	4	4	4	4	4	4	4	4	4	4	685759	613496	1.63288e+06	1242728	1.41463e+06	1.18335e+06	1.52358e+06	1.11345e+06	1.14549e+06	1.27415e+06	1.37681e+06	831623	1.08454e+06	743977	1.45858e+06	1.59486e+06	1.07566e+06	1.00345e+06	1.30794e+06	1.04202e+06	25726.4	P15530	Cd79b		25726.4
25814.5	P35762	Cd81	CD81 antigen	CD81_MOUSE	4	4	4	4	4	4	4	4	4	4	4	4	4	4	4	4	4	4	4	4	141121	104492	267293	273655	206934	160753	245205	164789	211012	220097	244495	209542	172181	147079	256312	245070	127826	181979	197721	169374	25814.5	P35762	Cd81		25814.5
29628.5	P40237	Cd82	CD82 antigen	CD82_MOUSE	3	4	4	4	5	5	4	5	4	5	5	5	5	4	5	5	3	3	3	4	352246	266668	737058	493938	656711	557067	705868	534099	842021	887510	1.1034e+06	678003	771266	552251	1.16568e+06	1.15651e+06	171449	196019	249534	232228	29628.5	P40237	Cd82		29628.5
21312.6	O88324	Cd83	CD83 antigen	CD83_MOUSE	7	7	7	7	7	7	7	7	6	7	7	7	7	7	7	7	1	0	1	1	416059	349353	787803	486948	538671	454790	548522	436122	348386	401002	435986	237057	334876	266481	460412	457620	6025.52	NaN	7003.14	4399.09	21312.6	O88324	Cd83		21312.6
37378	Q18PI6	Cd84	SLAM family member 5	SLAF5_MOUSE	9	9	12	11	10	9	10	10	9	10	10	10	9	10	9	10	7	7	8	6	187523	148801	424546	354776	303537	281712	319849	262397	315860	343370	390270	282604	251082	220111	370821	381260	208499	160652	230279	206703	37378	Q18PI6	Cd84		37378
34665.72;34665.72-2	P42082;P42082-2	Cd86	T-lymphocyte activation antigen CD86;Isoform 2 of T-lymphocyte activation antigen CD86	CD86_MOUSE	4	4	6	6	4	5	5	6	4	5	5	4	5	5	5	5	0	0	1	0	112038	86513.3	295891	320994	203724	166582	210697	179133	198848	217600	261837	223325	196845	159638	277367	275523	NaN	NaN	22596.7	NaN	34665.7	P42082	Cd86		34665.7
25258	P40240	Cd9	CD9 antigen	CD9_MOUSE	3	2	3	2	3	2	3	3	2	0	4	2	1	1	2	3	2	4	3	5	27716.9	10714.3	46074	39626.6	51900.9	33903.9	53847.2	49151.8	33019.8	NaN	56829.2	30242.7	20337.3	14068.4	46451.8	55534.3	23007.2	43270.3	53865.2	70199	25258	P40240	Cd9		25258
69354.5	O89103	Cd93	C1Complement component C1q receptor	C1QR1_MOU	0	2	6	6	3	4	3	2	3	5	5	5	5	5	5	6	0	2	4	3	NaN	9261.55	49222.9	68339.3	33865.7	41630.1	41570.1	20914.4	39219.4	68048.9	64193.6	63267.6	55490.3	45775.2	80067.5	67148.9	NaN	19280.2	51007.9	21586.8	69354.5	O89103	Cd93		69354.5
16782.5	Q8VCN6	Cd99	CD99 antigen	CD99_MOUSE	1	2	0	2	2	2	2	3	1	3	2	2	3	3	2	2	0	0	0	0	4374.81	19723.4	NaN	22849.9	40613.8	31293.8	29718.1	30532.5	17511.7	39768.2	32954.4	28927.1	37898.3	30974.6	39252.9	31380.8	NaN	NaN	NaN	NaN	16782.5	Q8VCN6	Cd99		16782.5
135030	Q8CC12-2	Cdan1	Isoform 2 of Codanin-1	CDAN1_MOUSE	5	5	11	10	13	12	14	13	10	15	14	7	14	9	15	13	7	9	11	9	30383.7	29046.1	131985	63198.2	104912	113248	134441	94578.6	106733	152586	175871	41324.8	110237	64282.7	162789	179422	65028.9	74686.5	121154	85439	135030	Q8CC12-2	Cdan1		135030
38816.3	Q8CII2	Cdc123	Cell division cycle protein 123 homolog	CD123_MOUSE	9	7	11	10	10	10	10	11	10	11	10	10	9	10	11	10	6	9	8	7	130272	85201.6	256243	197161	291784	262296	350801	220487	375854	410991	473978	249405	351389	260272	551316	494646	50282.1	76195.8	109404	84765.8	38816.3	Q8CII2	Cdc123		38816.3
71460.2	Q8R349	Cdc16	Cell division cycle protein 16 homolog	CDC16_MOUSE	15	14	20	20	17	17	16	15	17	18	17	16	18	19	16	18	14	17	17	17	228471	165961	492187	390010	425069	381820	440980	313412	484797	554428	606873	355649	436277	345297	583421	540079	304031	319884	430723	350889	71460.2	Q8R349	Cdc16		71460.2
54815.8	Q9JJ66	Cdc20	Cell division cycle protein 20 homolog	CDC20_MOUSE	0	0	0	0	0	0	0	0	0	0	4	0	5	0	5	5	0	0	0	0	NaN	NaN	NaN	NaN	NaN	NaN	NaN	NaN	NaN	NaN	53065.3	NaN	35666.8	NaN	52173	43547.8	NaN	NaN	NaN	NaN	54815.8	Q9JJ66	Cdc20		54815.8
68561.6	Q8BGZ4	Cdc23	Cell division cycle protein 23 homolog	CDC23_MOUSE	15	15	20	18	17	19	18	18	19	20	18	18	19	19	19	18	15	17	19	17	235494	191766	629117	463654	468805	471814	581357	393371	611382	677976	770976	424827	550899	397282	713436	649462	299295	351724	448833	367427	68561.6	Q8BGZ4	Cdc23		68561.6
9760.89	Q99JP4	Cdc26	Anaphase-promoting complex subunit CDC26	CDC26_MOUSE	1	0	2	3	0	0	1	0	2	2	2	0	4	2	2	2	2	2	1	0	11304.3	NaN	13374.5	13141.2	NaN	NaN	10742.6	NaN	16896.9	34284.4	22581.4	NaN	40718.5	25118.5	28580.5	13219.9	17030.8	18056.3	10314.2	NaN	9760.89	Q99JP4	Cdc26		9760.89
91842.42;91842.42-3	A2A6Q5;A2A6Q5-3	Cdc27	Cell division cycle protein 27 homolog;Isoform 3 of Cell division cycle protein 27 homolog	CDC27_MOUSE	11	8	14	12	13	12	10	12	12	12	13	13	15	13	13	13	4	8	10	9	130212	52086.8	328994	203587	236626	156042	179528	140167	257245	278839	334137	214928	217128	209558	344896	303742	97380.9	121122	115099	139832	91842.4	A2A6Q5	Cdc27		91842.4
26621.7	Q8CFI2	Cdc34	UB2Ubiquitin-conjugating enzyme E2 R1	UB2R1_MO	7	7	7	6	7	7	7	6	7	6	7	7	7	7	7	7	2	0	4	4	136281	110435	308319	203398	245436	245616	285290	186619	356059	322451	417226	369210	347208	235246	433230	366434	41136	NaN	69339.9	43549.1	26621.7	Q8CFI2	Cdc34		26621.7
44593.4	Q61081	Cdc37	Hsp90 co-chaperone Cdc37	CDC37_MOUSE	13	12	14	13	13	13	13	14	14	15	13	13	14	13	13	13	11	13	13	13	1.20903e+06	861835	2.38135e+06	1.23847e+06	2.16885e+06	1.78625e+06	2.48884e+06	1813150	2885194	3.06294e+06	3369466	1.78498e+06	2.36005e+06	1.56697e+06	3482898	3.21151e+06	1.18692e+06	1.24711e+06	2.02208e+06	1.38485e+06	44593.4	Q61081	Cdc37		44593.4
38439.21;38439.21-2;38439.21-3;38439.21-4	Q9CZP7;Q9CZP7-2;Q9CZP7-3;Q9CZP7-4	Cdc37l1	Hsp90 co-chaperone Cdc37-like 1;Isoform 2 of Hsp90 co-chaperone Cdc37-like 1;Isoform 3 of Hsp90 co-chaperone Cdc37-like 1;Isoform 4 of Hsp90 co-chaperone Cdc37-like 1	CD37L_MOUSE	0	0	6	0	5	6	6	5	5	5	6	6	6	3	7	6	0	3	4	3	NaN	NaN	58205.1	NaN	64171.8	68209.3	85125.4	46200.9	61978.5	78971.8	91523.9	64552.9	78690.3	21722.9	123614	88057.7	NaN	14950.3	49325.4	19834.1	38439.2	Q9CZP7	Cdc37l1		38439.2
65461.2	Q9DC48	Cdc40	Pre-mRNA-processing factor 17	PRP17_MOUSE	24	24	29	25	24	28	25	24	24	25	25	25	28	24	24	26	23	26	25	27	610384	484849	1.28412e+06	722047	989119	865830	1071807	737902	1.1481e+06	1.26087e+06	1432739	686400	983308	682025	1.20876e+06	1.25262e+06	760556	1.00423e+06	1259399	1066081	65461.2	Q9DC48	Cdc40		65461.2
21310.6	P60766-1	Cdc42	Isoform 1 of Cell division control protein 42 homolog	CDC42_MOUSE	2	2	2	2	2	2	2	2	2	2	2	2	2	2	2	2	2	2	2	2	32147	18384.5	60468.6	41703.3	62325.4	52561.6	60950	46205.7	52512.5	63792.4	68826.9	53145.2	48149	38599.8	64406.5	61712.3	42432.1	31092.3	46466.5	34046.8	21310.6	P60766-1	Cdc42		21310.6
21258.6	P60766	Cdc42	Cell division control protein 42 homolog	CDC42_MOUSE	7	7	8	8	8	8	8	7	7	8	8	7	8	7	7	7	7	8	8	9	2.20919e+06	2.08123e+06	5.08614e+06	3.2056e+06	4271530	4.03447e+06	4.68253e+06	4517135	3.12546e+06	3.62489e+06	4.10872e+06	3.57245e+06	3.51212e+06	2.66311e+06	4.45173e+06	4.18906e+06	3.45839e+06	3.50885e+06	4369215	3.5673e+06	21258.6	P60766	Cdc42		21258.6
9223.49	Q8BGH7	Cdc42se2	C42CDC42 small effector protein 2	C42S2_MO	1	0	1	1	1	1	1	1	1	1	1	1	1	1	1	1	1	1	1	1	12278.9	NaN	40751.6	12841.6	43837.9	24586.3	30813.4	37779.2	48119.5	51472.1	67984.3	44563.9	50832.1	22123.9	72725.7	63320.2	30769	26471.3	40412.9	33015.8	9223.49	Q8BGH7	Cdc42se2		9223.49
65384.3	Q9Z1X9	Cdc45	Cell division control protein 45 homolog	CDC45_MOUSE	9	8	11	9	10	11	13	10	15	14	14	13	14	12	13	12	0	2	3	3	61449.1	46898.6	165851	122672	161854	180067	230608	127585	372196	382753	470201	198168	294349	204283	409109	383010	NaN	4886.48	14848.2	15730.9	65384.3	Q9Z1X9	Cdc45		65384.3
92189.5	Q6A068	Cdc5l	Cell division cycle 5-like protein	CDC5L_MOUSE	35	35	39	38	36	35	38	37	37	38	37	36	38	34	38	36	31	40	39	38	2.26827e+06	1.86493e+06	4595571	3249094	3399687	3.02789e+06	3.60688e+06	2.65854e+06	4065510	4.26416e+06	4.94178e+06	3.00588e+06	3.25369e+06	2.34673e+06	4.34246e+06	4436139	2.68254e+06	3.512e+06	4282529	3.53957e+06	92189.5	Q6A068	Cdc5l		92189.5
62613.7	O89033	Cdc6	Cell division control protein 6 homolog	CDC6_MOUSE	3	0	4	0	0	2	6	3	11	10	11	0	9	6	11	10	0	0	0	0	16226.3	NaN	34139.3	NaN	NaN	22339.4	71978.1	21316.7	174743	172535	207297	NaN	136370	58144.2	181501	168870	NaN	NaN	NaN	NaN	62613.7	O89033	Cdc6		62613.7
60576.6	Q8JZM7	Cdc73	Parafibromin	CDC73_MOUSE	28	26	32	32	29	28	28	27	29	29	28	29	29	29	26	28	23	27	25	29	879129	736956	2.01963e+06	1.45506e+06	1.47252e+06	1.38127e+06	1.58955e+06	1.26473e+06	1742448	1.82449e+06	2.04182e+06	1.28573e+06	1.44101e+06	1.089e+06	1.88732e+06	1.83771e+06	1.22519e+06	1.27905e+06	1.56658e+06	1.38302e+06	60576.6	Q8JZM7	Cdc73		60576.6
106366	Q14B71	Cdca2	Cell division cycle-associated protein 2	CDCA2_MOUSE	0	0	4	0	5	3	4	6	11	9	10	0	9	5	9	10	0	0	0	0	NaN	NaN	18475.5	NaN	31776.4	15723.1	29443.5	16913.6	74321.9	74913.5	90887.1	NaN	68586.1	23161.7	82868.6	109129	NaN	NaN	NaN	NaN	106366	Q14B71	Cdca2		106366
28707.9	Q99M54	Cdca3	Cell division cycle-associated protein 3	CDCA3_MOUSE	0	0	0	0	0	0	4	2	4	4	4	0	4	3	3	4	0	0	0	0	NaN	NaN	NaN	NaN	NaN	NaN	69702.8	13634.5	73359.5	78991.9	103188	NaN	69099.6	18646.5	57854	103241	NaN	NaN	NaN	NaN	28707.9	Q99M54	Cdca3		28707.9
28991.3	Q9CPY3	Cdca5	Sororin	CDCA5_MOUSE	5	2	6	0	5	5	5	5	5	5	6	4	7	4	6	6	0	0	0	0	31612	9776.52	82769.7	NaN	74240.1	57814.6	89605	72163.4	115271	119062	149343	19726.6	111471	51692.6	153878	152626	NaN	NaN	NaN	NaN	28991.3	Q9CPY3	Cdca5		28991.3
43837.3	Q9D0M2	Cdca7	Cell division cycle-associated protein 7	CDCA7_MOUSE	7	5	10	3	7	7	7	7	9	10	10	2	11	7	8	9	0	0	0	0	69164.2	40608.2	202530	16126	93620.2	72642.9	89316	77375.3	174389	195180	218060	18839.9	180687	94608.7	168423	175134	NaN	NaN	NaN	NaN	43837.3	Q9D0M2	Cdca7		43837.3
50248.3	Q922M5	Cdca7l	Cell division cycle-associated 7-like protein	CDA7L_MOUSE	3	1	5	1	5	3	6	4	7	7	6	0	7	2	6	7	0	3	2	4	30543.2	19879	119203	16769.2	68206.1	50966.4	62873.9	47492.8	123056	139134	130518	NaN	116526	40344	124539	120943	NaN	13693.7	15326.4	33059.8	50248.3	Q922M5	Cdca7l		50248.3
32214	Q8BHX3	Cdca8	Borealin	BOREA_MOUSE	5	4	7	4	7	7	8	6	9	6	9	2	9	6	8	9	0	0	3	0	37658.8	19563.1	224443	16838.7	191487	84035.7	194146	69831	278733	233462	243800	10665	244858	63051	318756	339113	NaN	NaN	29083.2	NaN	32214	Q8BHX3	Cdca8		32214
91645.4	Q9R100	Cdh17	Cadherin-17	CAD17_MOUSE	0	0	0	0	2	0	0	0	2	1	2	0	3	1	2	3	0	4	2	0	NaN	NaN	NaN	NaN	4194.55	NaN	NaN	NaN	5796.63	7897.5	19430.5	NaN	19276.2	7895.45	14914.6	25601.3	NaN	15181.7	11906.9	NaN	91645.4	Q9R100	Cdh17		91645.4
32112.8;32112.8-2	Q3U4G0;Q3U4G0-2	Cdin1	CDAN1-interacting nuclease 1;Isoform 2 of CDAN1-interacting nuclease 1	CDIN1_MOUSE	0	0	1	0	0	1	0	1	1	1	0	1	0	0	1	1	0	0	0	0	NaN	NaN	7104.87	NaN	NaN	5487.1	NaN	9839.23	6281.22	8996.68	NaN	10440.5	NaN	NaN	15030.8	11985.4	NaN	NaN	NaN	NaN	32112.8	Q3U4G0	Cdin1		32112.8
23598.9	Q8VDP6	Cdipt	CDP-diacylglycerol--inositol 3-phosphatidyltransferase	CDIPT_MOUSE	5	5	5	5	5	5	5	5	5	5	5	5	5	5	5	5	4	5	5	5	461498	392176	885705	775053	801333	639226	777795	600454	626167	724819	958594	675012	517949	420059	891375	831941	430524	731616	988187	809718	23598.9	Q8VDP6	Cdipt		23598.9
34106.6	P11440	Cdk1	Cyclin-dependent kinase 1	CDK1_MOUSE	6	5	9	5	10	11	11	10	12	12	10	7	13	11	11	11	4	5	7	7	70585.5	46111	375103	43136.4	390561	421442	574691	373247	731106	792774	939940	105168	671286	356653	1.02065e+06	1.02766e+06	61777.8	30803.8	111765	187875	34106.6	P11440	Cdk1		34106.6
40960.9	Q3UMM4	Cdk10	Cyclin-dependent kinase 10	CDK10_MOUSE	0	2	5	3	5	5	0	7	5	5	5	4	6	4	3	7	0	0	3	4	NaN	17294.3	83573.5	37731.2	82327.7	67870.8	NaN	72215.6	71389.8	82700.8	100876	39042.4	75997.6	36362.8	67961.1	103401	NaN	NaN	21141.2	47093.4	40960.9	Q3UMM4	Cdk10		40960.9
91513.4	P24788	Cdk11b	Cyclin-dependent kinase 11B	CD11B_MOUSE	27	28	30	29	30	30	31	31	29	31	31	30	30	27	30	30	27	30	30	29	871592	658571	1.74211e+06	1.38516e+06	1.57212e+06	1.43019e+06	1.61642e+06	1.20184e+06	1.85231e+06	1.95841e+06	2.17082e+06	1.44767e+06	1.59094e+06	1.14462e+06	2.1051e+06	2.04384e+06	1.32226e+06	1.24885e+06	1704443	1.32535e+06	91513.4	P24788	Cdk11b		91513.4
163681.29;163681.29-3	Q14AX6;Q14AX6-3	Cdk12	Cyclin-dependent kinase 12;Isoform 3 of Cyclin-dependent kinase 12	CDK12_MOUSE	14	14	16	16	16	15	14	15	15	17	17	15	17	16	17	17	14	16	17	16	178415	135504	336618	219512	297109	260865	292352	215307	319816	380754	466691	281034	264402	213692	354843	376521	250112	246139	330950	301765	163681	Q14AX6	Cdk12		163681
164553	Q69ZA1	Cdk13	Cyclin-dependent kinase 13	CDK13_MOUSE	21	24	25	26	26	24	23	25	24	23	27	26	24	22	25	23	20	23	25	25	318200	265734	671729	541493	598719	523887	575115	471500	571482	614428	765473	527230	521966	361735	735784	692036	559431	571588	775268	614734	164553	Q69ZA1	Cdk13		164553
59506.11;59506.11-2	Q8K0D0;Q8K0D0-2	Cdk17	Cyclin-dependent kinase 17;Isoform 2 of Cyclin-dependent kinase 17	CDK17_MOUSE	7	5	9	9	8	8	11	9	9	8	10	9	11	9	10	8	7	8	8	9	69690.2	54316.5	186102	130531	168569	160109	210938	148217	178556	187647	223661	144243	180788	124293	198218	220664	103080	124955	175858	129501	59506.1	Q8K0D0	Cdk17		59506.1
56570	Q8BWD8	Cdk19	Cyclin-dependent kinase 19	CDK19_MOUSE	4	0	3	5	5	4	5	5	3	0	4	3	3	0	3	4	2	5	5	5	19076.2	NaN	32620.5	42769.4	53406.7	32337.4	39453.4	29880.7	19761.9	NaN	46159.7	43586.4	18518.8	NaN	53055.8	28990.2	22609.5	51150.4	74797.9	67844.6	56570	Q8BWD8	Cdk19		56570
38978.29;38978.29-2	P97377;P97377-2	Cdk2	Cyclin-dependent kinase 2;Isoform CDK2-alpha of Cyclin-dependent kinase 2	CDK2_MOUSE	12	11	13	13	13	12	13	14	13	12	13	13	14	12	13	13	10	11	12	11	380211	263297	735146	531186	706735	679990	859836	650345	892328	1.00116e+06	1.16507e+06	662461	821578	533365	1.08604e+06	1.09196e+06	311164	315020	541725	454367	38978.3	P97377	Cdk2		38978.3
33750.8	P30285	Cdk4	Cyclin-dependent kinase 4	CDK4_MOUSE	10	6	11	9	9	9	11	10	12	11	12	12	12	11	12	11	2	5	7	5	161506	89517	326272	223842	321259	316124	371986	284407	586582	647700	700515	423756	526874	383580	708483	671140	21984.4	50862.2	79007.4	52275	33750.8	P30285	Cdk4		33750.8
33288.5	P49615	Cdk5	Cyclin-dependent kinase 5	CDK5_MOUSE	7	6	11	11	8	8	7	8	8	8	8	8	10	8	8	8	8	8	9	10	83494.3	67286.7	213323	127191	188369	148098	210685	151309	185357	183370	204525	130462	185184	116698	254118	261136	160544	181905	303386	203899	33288.5	P49615	Cdk5		33288.5
66109.5	Q8BTW8	Cdk5rap1	CK5Mitochondrial tRNA methylthiotransferase CDK5RAP1	CK5P1_MO	0	0	1	0	2	1	0	2	2	2	2	0	0	1	0	2	0	0	0	0	NaN	NaN	9972.96	NaN	11345.3	1855.838134765625	NaN	10265.4	17570.3	21452.7	13779.2	NaN	NaN	1718.4271240234375	NaN	23698.8	NaN	NaN	NaN	NaN	66109.5	Q8BTW8	Cdk5rap1		66109.5
205945	Q8K389	Cdk5rap2	CK5CDK5 regulatory subunit-associated protein 2	CK5P2_MO	25	15	29	24	27	27	27	30	34	26	31	27	31	22	31	29	17	30	31	31	166679	64479.5	361455	239422	274234	233157	274228	278739	332592	330074	425002	219647	290616	145608	411381	363859	160653	259407	373018	288666	205945	Q8K389	Cdk5rap2		205945
56990.8	Q99LM2	Cdk5rap3	CK5CDK5 regulatory subunit-associated protein 3	CK5P3_MO	15	18	18	14	16	15	16	15	16	18	17	17	17	14	17	17	14	16	16	15	297773	250881	621052	358817	473257	377118	473223	360700	527841	537058	699350	396077	488402	315275	634264	657597	381232	471468	609706	442010	56990.8	Q99LM2	Cdk5rap3		56990.8
37028.4	Q64261	Cdk6	Cyclin-dependent kinase 6	CDK6_MOUSE	14	10	13	12	13	15	12	14	12	15	15	13	13	13	14	13	8	8	10	10	281350	229719	546869	289960	516933	520650	588372	413963	646588	708485	860774	411141	563318	429586	777778	768930	111235	119108	230631	167677	37028.4	Q64261	Cdk6		37028.4
38968.3	Q03147	Cdk7	Cyclin-dependent kinase 7	CDK7_MOUSE	10	10	14	13	10	10	12	12	11	12	12	12	12	11	12	11	9	10	10	11	195702	155383	505723	393195	305016	237658	408064	222031	480728	503754	533854	381345	352138	267311	458087	456625	218900	175270	275643	222372	38968.3	Q03147	Cdk7		38968.3
53209.7;53209.7-3	Q8R3L8;Q8R3L8-3	Cdk8	Cyclin-dependent kinase 8;Isoform 3 of Cyclin-dependent kinase 8	CDK8_MOUSE	4	4	6	5	5	5	5	0	5	7	5	7	7	4	5	5	5	4	6	5	32985.9	19758.5	88595.3	59364.9	56411	50215.9	56373.8	NaN	66922.4	82692.8	83483.4	71237.7	71807.7	37287.5	92805.5	81872.7	60784.9	50190.1	85459.8	63935	53209.7	Q8R3L8	Cdk8		53209.7
42761.6	Q99J95	Cdk9	Cyclin-dependent kinase 9	CDK9_MOUSE	10	9	11	11	10	11	10	10	10	10	11	11	11	10	11	10	8	10	10	9	214856	169540	533723	370049	339655	363078	416685	280685	460430	552674	577534	374584	422694	303854	522470	482510	261619	293770	388134	304210	42761.6	Q99J95	Cdk9		42761.6
65288.7	Q91WE6	Cdkal1	Threonylcarbamoyladenosine tRNA methylthiotransferase	CDKAL_MOUSE	11	8	11	10	9	9	8	10	12	12	12	10	12	8	13	12	7	10	9	8	105223	85010.7	212631	115128	162072	120156	158838	152827	222376	226247	277600	124432	183659	120464	268422	247081	78034.1	116947	151706	97335.8	65288.7	Q91WE6	Cdkal1		65288.7
17785.1	P39689	Cdkn1a	Cyclin-dependent kinase inhibitor 1	CDN1A_MOUSE	0	0	0	5	0	3	1	0	2	2	3	5	1	0	0	0	0	0	0	0	NaN	NaN	NaN	189097	NaN	36267.5	6272.33	NaN	9111.15	16609.9	20363.2	313960	3458.69	NaN	NaN	NaN	NaN	NaN	NaN	NaN	17785.1	P39689	Cdkn1a		17785.1
22193.4	P46414	Cdkn1b	Cyclin-dependent kinase inhibitor 1B	CDN1B_MOUSE	5	2	6	5	6	7	7	6	5	3	4	4	6	6	6	5	6	7	7	7	47180.7	11240.2	84288.7	52676.3	111754	81509.5	120323	74739.4	42183.2	24654.1	39014.3	54838.6	77465.3	54110.6	100242	97921.9	388093	433176	619939	446161	22193.4	P46414	Cdkn1b		22193.4
59744.6	Q8BI72	Cdkn2aip	CDKN2A-interacting protein	CARF_MOUSE	16	15	21	21	21	19	17	19	19	20	20	20	20	16	18	19	20	22	23	21	362683	296384	883118	769055	650361	550955	605494	503128	552107	688645	720381	594532	521855	390812	666789	699937	920733	974716	1.18492e+06	968149	59744.6	Q8BI72	Cdkn2aip		59744.6
13300.3	Q8R3A2	Cdpf1	Cysteine-rich DPF motif domain-containing protein 1	CDPF1_MOUSE	0	0	3	3	3	0	2	3	2	3	0	1	2	2	3	3	3	3	2	3	NaN	NaN	37170.5	19435.5	29476.6	NaN	28168.2	25806.2	23021.3	33422.2	NaN	6141.77	25588.1	11488.7	35496.6	30841.5	33361.6	34247	21693.7	35010.2	13300.3	Q8R3A2	Cdpf1		13300.3
51313.8	Q99L43	Cds2	Phosphatidate cytidylyltransferase 2	CDS2_MOUSE	7	7	9	7	7	7	8	7	5	7	7	7	7	6	7	7	7	7	7	7	209033	182784	355883	303296	351345	293872	334919	309253	259979	325400	394428	308492	253663	192683	380720	320568	314134	414299	527827	422461	51313.8	Q99L43	Cds2		51313.8
54313.1	Q7TPC1	Cdsn	Corneodesmosin	CDSN_MOUSE	0	0	1	0	1	1	0	1	0	1	0	0	0	1	0	0	1	1	0	1	NaN	NaN	48858.9	NaN	35364.1	16696.1	NaN	19783	NaN	18553.9	NaN	NaN	NaN	25504.5	NaN	NaN	45576.2	26877.4	NaN	21977.2	54313.1	Q7TPC1	Cdsn		54313.1
61510	Q8R4E9	Cdt1	DNA replication factor Cdt1	CDT1_MOUSE	16	16	21	20	18	17	19	18	18	19	21	18	20	17	21	19	15	20	18	17	209594	153669	584675	446863	354222	362364	427557	291310	350829	485597	573760	382060	378474	296500	557118	483902	288641	407275	445410	354372	61510	Q8R4E9	Cdt1		61510
29729	Q4VAA2	Cdv3	Protein CDV3	CDV3_MOUSE	16	14	19	15	17	15	16	16	17	16	16	16	16	16	17	16	13	13	13	14	760398	514380	1.51564e+06	725842	1.21754e+06	1.08212e+06	1.59095e+06	1.12062e+06	1.64961e+06	1.84848e+06	2043383	1.10294e+06	1.40153e+06	1.12201e+06	1976805	1.84913e+06	677822	562746	879404	683204	29729	Q4VAA2	Cdv3		29729
60141.6	Q9WTK2-2	Cdyl	Isoform 2 of Chromodomain Y-like protein	CDYL_MOUSE	6	5	9	10	7	7	9	9	8	8	8	8	8	7	9	9	8	8	8	8	35931.1	23379.9	114430	89943.9	67534.1	77252.2	98069.3	73133.4	103186	94600.3	112484	68643.1	80356.4	47494.3	127636	107488	98560.9	86478.3	129232	103571	60141.6	Q9WTK2-2	Cdyl		60141.6
56142	Q9D5D8	Cdyl2	Chromodomain Y-like protein 2	CDYL2_MOUSE	4	0	5	4	4	5	3	3	4	2	5	4	4	5	3	5	3	5	5	4	24718.6	NaN	56972.3	29512.3	49228.2	52603.9	21196.6	22306.8	47069.9	9677.3	48798.9	35460.1	34269.8	36147.2	34045.8	51043.4	42474.3	79666.4	103099	52596.7	56142	Q9D5D8	Cdyl2		56142
57015.8	P31809	Ceacam1	Carcinoembryonic antigen-related cell adhesion molecule 1	CEAM1_MOUSE	2	1	2	2	3	2	2	2	3	2	3	2	3	2	3	3	3	3	3	3	16463.3	5496.25	32335.9	24940.8	26810.6	17561.6	27075.6	18872.4	21865.9	24272.4	21784.2	13907.2	35033.1	10851.9	35203.8	49804	56924.2	52622.1	53113.1	47534.9	57015.8	P31809	Ceacam1		57015.8
31445.77;31445.77-2;31445.77-3	P28033;P28033-2;P28033-3	Cebpb	CCAAT/enhancer-binding protein beta;Isoform 3 of CCAAT/enhancer-binding protein beta;Isoform 2 of CCAAT/enhancer-binding protein beta	CEBPB_MOUSE	1	0	2	3	1	2	1	1	1	0	1	2	0	0	1	0	0	0	0	0	6087.13	NaN	18939.4	39580.9	7491.36	12445.4	12205.5	7317.9	6857.92	NaN	9036.09	22041.7	NaN	NaN	12195.4	NaN	NaN	NaN	NaN	NaN	31445.8	P28033	Cebpb		31445.8
16399.5	P53568	Cebpg	CCAAT/enhancer-binding protein gamma	CEBPG_MOUSE	1	0	1	1	1	1	1	1	1	1	1	1	1	1	1	1	0	1	0	1	9180.23	NaN	14478.7	15265.1	11439.3	13676.9	15958.9	10862	14267.1	14093.7	13920.6	19403.9	10956	8953.39	12183.8	14712.7	NaN	5935.74	NaN	6849.89	16399.5	P53568	Cebpg		16399.5
120262	P53569	Cebpz	CCAAT/enhancer-binding protein zeta	CEBPZ_MOUSE	33	30	39	39	34	34	35	32	33	37	37	35	35	33	35	33	21	26	25	26	1.01351e+06	775103	2.32557e+06	1.64074e+06	1.40504e+06	1.38002e+06	1501476	1.07001e+06	2.00278e+06	2.16726e+06	2584305	1.47746e+06	1.59037e+06	1179737	2.03667e+06	1909361	386001	479472	519868	556602	120262	P53569	Cebpz		120262
9285.93	Q8BTE5	Cebpzos	Protein CEBPZOS	CEBOS_MOUSE	0	0	2	1	3	1	2	2	3	1	2	0	2	0	3	3	0	0	0	0	NaN	NaN	52682.4	4469.6	39519.3	8186.34	5694.51	32882.3	37655.9	10722.8	20776.9	NaN	34708.9	NaN	33310.2	44186.5	NaN	NaN	NaN	NaN	9285.93	Q8BTE5	Cebpzos		9285.93
161529.74;161529.74-2	E9Q2Z1;E9Q2Z1-2	Cecr2	Chromatin remodeling regulator CECR2;Isoform 2 of Chromatin remodeling regulator CECR2	CECR2_MOUSE	3	0	6	2	2	5	6	4	5	4	4	1	5	1	5	5	5	8	7	11	7712.37	NaN	44026.6	5410.14	11471.8	23947.7	48292.3	17076.2	31854.8	26991	34043.4	4595.07	40207.6	2712.496826171875	41739.9	43670.2	44375.6	54585.6	60161.9	89683.5	161530	E9Q2Z1	Cecr2		161530
55115.8	P28659-4	Celf1	Isoform 4 of CUGBP Elav-like family member 1	CELF1_MOUSE	9	9	14	15	9	11	10	10	9	9	10	9	11	9	9	8	7	8	8	9	413315	321275	1.05909e+06	640260	715245	680572	730422	537557	850143	955147	1.12372e+06	642033	783024	491075	1.0103e+06	917122	347563	491584	607421	499928	55115.8	P28659-4	Celf1		55115.8
49253.9	Q9Z0H4-11	Celf2	Isoform 11 of CUGBP Elav-like family member 2	CELF2_MOUSE	11	9	15	13	9	10	13	9	10	10	10	10	14	10	9	9	9	9	12	9	744797	562663	1.79232e+06	1.42822e+06	1.3199e+06	1.1414e+06	1.43017e+06	1.04334e+06	1.3792e+06	1.56014e+06	1.78179e+06	1.42243e+06	1.38055e+06	984723	1.73502e+06	1713238	1.48769e+06	1.77627e+06	2.22262e+06	1.78564e+06	49253.9	Q9Z0H4-11	Celf2		49253.9
153801	Q5FWI3	Cemip2	Cell surface hyaluronidase	CEIP2_MOUSE	0	0	3	3	0	3	3	2	3	2	3	2	0	1	0	0	2	4	2	0	NaN	NaN	14790.7	20388.6	NaN	24710.2	29499.4	15849	47556.8	12663	44768	19468.4	NaN	4868.64	NaN	NaN	17271.5	29930.5	13313.7	NaN	153801	Q5FWI3	Cemip2		153801
37701.49;37701.49-2;37701.49-3	Q4VA36;Q4VA36-2;Q4VA36-3	Cenatac	Centrosomal AT-AC splicing factor;Isoform 2 of Centrosomal AT-AC splicing factor;Isoform 3 of Centrosomal AT-AC splicing factor	CATAC_MOUSE	2	1	3	2	1	2	1	0	3	3	3	0	2	2	1	0	2	3	3	3	12565.1	15884.7	48741.5	59785.1	30230.3	32973.7	26360.6	NaN	50180	46415	49930.6	NaN	26216.4	32980.5	26775.7	NaN	21285.7	50851.1	50771.5	50482.1	37701.5	Q4VA36	Cenatac		37701.5
15509.1	O35216	Cenpa	Histone H3-like centromeric protein A	CENPA_MOUSE	0	3	3	3	2	2	1	2	2	2	2	0	3	2	0	1	2	3	3	0	NaN	51685.5	92518.3	77307.1	53474.1	41724.9	39541.7	58242.5	49877.5	45225.6	58803.1	NaN	41201.6	38107.2	NaN	37228.9	65094.8	84988	97389.2	NaN	15509.1	O35216	Cenpa		15509.1
102154	P49452	Cenpc	Centromere protein C	CENPC_MOUSE	19	17	21	21	21	19	20	26	19	16	21	22	21	16	22	19	14	24	22	22	200204	143498	451422	419787	295686	315712	326237	294802	316966	316314	362858	405635	288427	197579	358297	315150	276859	459354	518852	428255	102154	P49452	Cenpc		102154
286525	Q6RT24	Cenpe	Centromere-associated protein E	CENPE_MOUSE	0	0	0	0	0	9	9	6	17	17	18	0	20	5	18	23	0	0	0	0	NaN	NaN	NaN	NaN	NaN	55370.7	67946	22419.8	105828	130769	195976	NaN	130140	35892.7	158505	177309	NaN	NaN	NaN	NaN	286525	Q6RT24	Cenpe		286525
342471.76;342451.67;281905.31	E9Q3P4;Q155P7;Q9QZ84	Cenpf	E9Q3Centromere protein F;Q155LEK1;Q9LEK1 (Fragment)	E9Q3P4_M;Q155P7_M;Q9QZ84_MOU	0	0	0	0	1	0	2	0	0	0	1	0	0	0	2	0	0	0	0	0	NaN	NaN	NaN	NaN	2900.79	NaN	5332.04	NaN	NaN	NaN	8286.37	NaN	NaN	NaN	15670.5	NaN	NaN	NaN	NaN	NaN	342472	E9Q3P4	Cenpf		342472
28135.5	Q9QYM8	Cenph	Centromere protein H	CENPH_MOUSE	0	0	2	1	2	3	1	0	4	4	4	3	4	2	4	4	0	0	0	0	NaN	NaN	17569	6165.59	22800.2	35750.6	5929.19	NaN	68840.1	70804.5	73499.1	31370.8	56990.5	21264.1	67029.8	81776.4	NaN	NaN	NaN	NaN	28135.5	Q9QYM8	Cenph		28135.5
85403.4	Q8K1K4	Cenpi	Centromere protein I	CENPI_MOUSE	2	0	0	2	1	0	0	1	2	2	2	0	0	2	0	0	2	4	1	2	9338.65	NaN	NaN	8961.54	7454.03	NaN	NaN	6231.13	13302.3	13509.7	19458.2	NaN	NaN	11827.5	NaN	NaN	4668.25	15155.4	9488.47	15112.5	85403.4	Q8K1K4	Cenpi		85403.4
31686.3	Q9ESN5	Cenpk	Centromere protein K	CENPK_MOUSE	0	0	0	0	2	2	0	2	4	3	4	0	4	2	2	3	0	0	3	0	NaN	NaN	NaN	NaN	7147.15	14414.3	NaN	5958.55	41956	35950.2	65995.7	NaN	42521.2	16645.6	26455.8	38545.9	NaN	NaN	13932.6	NaN	31686.3	Q9ESN5	Cenpk		31686.3
37725.1	Q3U3S3	Cenpl	Centromere protein L	CENPL_MOUSE	0	0	1	2	0	0	0	1	1	2	0	1	1	0	1	0	2	2	1	2	NaN	NaN	7286.26	14938.4	NaN	NaN	NaN	5414.37	5956.63	13844.7	NaN	10394.1	8450.69	NaN	9964.45	NaN	12485	17483.4	11469.7	17488.9	37725.1	Q3U3S3	Cenpl		37725.1
39240.2;39240.2-3	Q9CZW2;Q9CZW2-3	Cenpn	Centromere protein N;Isoform 3 of Centromere protein N	CENPN_MOUSE	0	0	0	1	0	0	0	1	0	0	2	2	0	0	0	0	1	0	0	1	NaN	NaN	NaN	15258.4	NaN	NaN	NaN	8482.03	NaN	NaN	31165.8	27436.5	NaN	NaN	NaN	NaN	7805.56	NaN	NaN	6024.9	39240.2	Q9CZW2	Cenpn		39240.2
34154.09;34154.09-2	Q8K015;Q8K015-2	Cenpo	Centromere protein O;Isoform 2 of Centromere protein O	CENPO_MOUSE	0	0	3	3	3	1	2	2	3	3	3	0	4	0	4	3	2	2	2	3	NaN	NaN	42728.6	39402.9	36360.1	19646.7	29516.1	29090.4	50642.3	43958.2	48595.7	NaN	51496	NaN	63037.8	39858.2	27798.4	39444.3	39342	50605.2	34154.1	Q8K015	Cenpo		34154.1
33287.9	Q9CZ92	Cenpp	Centromere protein P	CENPP_MOUSE	2	0	0	3	0	3	3	0	4	4	6	3	5	2	6	6	0	3	4	5	7205.02	NaN	NaN	26964.4	NaN	23967.5	24763.6	NaN	40658.3	28183.3	58268.5	20722.4	38276.2	11156.7	49367	60531	NaN	27194.1	39566.4	32724.8	33287.9	Q9CZ92	Cenpp		33287.9
30501.2	Q9CPQ5	Cenpq	Centromere protein Q	CENPQ_MOUSE	3	1	5	5	6	6	2	4	3	6	5	4	4	4	5	4	4	6	6	5	22542.4	5290.2	51226.5	53758.6	40274.8	56009.9	21131.7	27912.5	37514	80827.8	67396.3	28774.2	45846.3	40129.2	64640	64766.6	42131.2	56170.5	73233.1	52328.4	30501.2	Q9CPQ5	Cenpq		30501.2
16335.4	Q9D084	Cenps	Centromere protein S	CENPS_MOUSE	0	0	0	0	2	0	0	2	2	1	2	0	2	1	0	2	0	2	2	2	NaN	NaN	NaN	NaN	19455.2	NaN	NaN	8193.43	39172.6	14464.6	33610.7	NaN	25411.6	8068.1	NaN	38777.7	NaN	16652	22747.2	15737	16335.4	Q9D084	Cenps		16335.4
56242.4	Q3TJM4	Cenpt	Centromere protein T	CENPT_MOUSE	0	3	3	0	2	4	3	0	0	3	3	3	0	3	2	0	0	0	3	0	NaN	34719.5	26610.3	NaN	76753.2	74074.9	26658	NaN	NaN	82090.4	113196	18901.2	NaN	43193.1	23128.7	NaN	NaN	NaN	56776.9	NaN	56242.4	Q3TJM4	Cenpt		56242.4
46370.5	Q8C4M7	Cenpu	Centromere protein U	CENPU_MOUSE	5	2	5	2	4	5	4	5	6	3	4	4	4	4	4	5	3	4	5	5	25879.6	12160.3	65493.4	27194.9	31987.5	43714.6	31862	26969.3	51764.2	40311	58064.2	24870.5	26789.7	32833.5	48061	48140.5	18827.2	34427.1	36163.1	42532.7	46370.5	Q8C4M7	Cenpu		46370.5
27541.1	Q9CXS4	Cenpv	Centromere protein V	CENPV_MOUSE	2	3	7	8	3	5	6	6	5	4	5	7	5	5	5	6	7	8	5	8	25707.1	26261.8	115722	134459	60203.2	63174	82710.4	73224	60259.6	67577.2	85318	87542.9	68961	37094	73011.8	81493.2	104703	120831	135379	166162	27541.1	Q9CXS4	Cenpv		27541.1
112579	Q7TSG1	Cep120	Centrosomal protein of 120 kDa	CE120_MOUSE	11	6	19	18	21	10	14	14	10	10	17	12	11	7	14	15	17	27	27	22	69226.5	28383.7	180516	187761	201989	79681.8	132056	106556	82184.2	87332.1	149673	93227.1	94637.2	46618.3	139292	146819	209215	290314	356609	265793	112579	Q7TSG1	Cep120		112579
128503.07;128503.07-2	Q8BI22;Q8BI22-2	Cep128	Centrosomal protein of 128 kDa;Isoform 2 of Centrosomal protein of 128 kDa	CE128_MOUSE	0	0	0	0	6	6	4	6	4	0	4	4	8	3	7	0	0	11	10	10	NaN	NaN	NaN	NaN	56706.6	46304	28718.7	26952.4	21662.7	NaN	30295.6	23410.2	50522.7	10650.8	58619.9	NaN	NaN	88662.5	108763	79600.1	128503	Q8BI22	Cep128		128503
120313	Q62036	Cep131	Centrosomal protein of 131 kDa	CP131_MOUSE	0	0	0	4	5	1	6	0	7	6	3	0	5	3	4	5	0	2	4	2	NaN	NaN	NaN	24026.1	43861.7	7574.8	44654.5	NaN	46985.6	43479.3	40370	NaN	26243.3	14755.7	30960.6	34930.8	NaN	14268.7	34177.3	18701.8	120313	Q62036	Cep131		120313
133345	Q6P5D4	Cep135	Centrosomal protein of 135 kDa	CP135_MOUSE	26	22	32	31	30	29	32	28	28	28	29	33	26	27	36	28	27	35	41	35	293267	208705	710977	541106	576773	456899	689890	394049	589345	617223	750875	519006	447117	383031	818059	610028	569270	687017	1056958	833312	133345	Q6P5D4	Cep135		133345
196534	A2AUM9	Cep152	Centrosomal protein of 152 kDa	CE152_MOUSE	9	5	12	7	10	8	11	8	11	11	13	8	12	3	9	9	5	15	11	10	62363.2	19611.8	89817.6	29118.2	67408.8	77638.6	98253.9	60765.1	109548	96647.7	134241	38566.7	67729.8	13394.9	83722.9	106808	53292	119428	98341.6	86457.2	196534	A2AUM9	Cep152		196534
160855	Q6ZQ06	Cep162	Centrosomal protein of 162 kDa	CE162_MOUSE	2	2	3	1	4	3	3	4	3	3	5	3	5	5	5	4	2	4	6	5	5032.31	5620.82	17226.7	3863.42	25189.3	11100.7	9688.44	14081.2	14198.5	17004.1	28090.1	8458.07	15397.6	19975.8	26944	12375.7	9009.72	11641.5	27339.1	29808.8	160855	Q6ZQ06	Cep162		160855
175050	Q6A065	Cep170	Centrosomal protein of 170 kDa	CE170_MOUSE	21	21	30	24	27	28	26	25	29	28	29	28	35	25	27	27	25	33	32	28	174398	150135	1.14783e+06	253400	370064	336520	408667	369705	455202	444435	453143	303507	481445	254921	458254	458752	420438	932641	652942	452646	175050	Q6A065	Cep170		175050
170821	Q80U49	Cep170b	Centrosomal protein of 170 kDa protein B	C170B_MOUSE	1	0	2	3	0	0	0	0	1	2	0	4	0	2	0	0	0	0	0	0	1556.49	NaN	13256.5	26547.5	NaN	NaN	NaN	NaN	1968.53	9648.07	NaN	51535.9	NaN	6524.52	NaN	NaN	NaN	NaN	NaN	NaN	170821	Q80U49	Cep170b		170821
276341	E9Q4Y4	Cep192	E9Q4Centrosomal protein 192	E9Q4Y4_M	24	18	28	23	26	27	28	27	32	31	29	23	33	23	29	30	14	29	30	26	177631	106199	402911	254118	274311	286806	385950	260236	394726	400947	417641	244001	337489	241070	436919	408204	154331	286180	383340	287459	276341	E9Q4Y4	Cep192		276341
276814	Q60952	Cep250	Centrosome-associated protein CEP250	CP250_MOUSE	18	16	27	30	21	23	19	14	26	22	25	27	25	19	21	25	19	39	39	34	135850	111184	782162	634544	274801	245381	230358	167920	308324	254199	345701	273293	602169	182042	334501	304606	267436	439153	851093	691008	276814	Q60952	Cep250		276814
346456	E9Q309	Cep350	Centrosome-associated protein 350	CE350_MOUSE	22	15	26	30	30	29	32	28	29	29	26	23	28	15	28	22	19	32	41	32	143714	69298.8	268654	268679	206555	276553	353759	163715	254922	310398	363393	146964	174423	88493.8	365612	248906	170474	338708	469059	325211	346456	E9Q309	Cep350		346456
41441.7	Q99NF3	Cep41	Centrosomal protein of 41 kDa	CEP41_MOUSE	5	4	8	8	9	5	9	7	8	8	8	9	7	8	8	7	6	8	9	7	28509	22503.6	86121.4	81818.6	95815.4	53408.9	105238	63552	96598.6	91756	119430	103378	88619.8	53305.7	129867	117406	48793	74786.1	108704	79068.8	41441.7	Q99NF3	Cep41		41441.7
42758.36;42758.36-2	Q66JX5;Q66JX5-2	Cep43	Centrosomal protein 43;Isoform 2 of Centrosomal protein 43	CEP43_MOUSE	9	7	11	9	9	10	10	9	10	10	10	10	11	10	10	11	9	10	10	9	149935	113815	315746	214367	223586	235709	264844	170045	305388	326654	340333	243298	271718	186642	336158	368886	206697	250409	340817	238525	42758.4	Q66JX5	Cep43		42758.4
43255.3	Q5HZK1	Cep44	Centrosomal protein of 44 kDa	CEP44_MOUSE	4	0	6	4	0	4	5	5	5	5	5	4	5	3	5	7	0	6	7	4	28084.8	NaN	67702.7	24954.6	NaN	29767.8	47473.6	36069.9	50754	37767.5	54882	19278.6	41658.9	25670	38057	83002.3	NaN	37558.1	72793.4	38405.1	43255.3	Q5HZK1	Cep44		43255.3
53930.3	Q8BT07	Cep55	Centrosomal protein of 55 kDa	CEP55_MOUSE	5	0	6	9	8	8	8	5	13	13	13	9	13	9	12	13	0	0	5	0	41591.4	NaN	71273.5	99255.3	94742.9	89625.9	127770	72106.7	248637	255693	307716	141324	218302	143868	276225	296259	NaN	NaN	67533.7	NaN	53930.3	Q8BT07	Cep55		53930.3
56909.46;56909.46-2	Q8CEE0;Q8CEE0-2	Cep57	Centrosomal protein of 57 kDa;Isoform 2 of Centrosomal protein of 57 kDa	CEP57_MOUSE	8	5	10	8	10	8	10	8	9	9	10	10	8	8	9	9	8	10	10	9	85255.2	57944.1	180478	156319	146871	132331	157792	119309	135855	167932	202196	146559	132082	111584	158394	167269	194516	217099	276313	240973	56909.5	Q8CEE0	Cep57		56909.5
62628	Q3UPP8-3	Cep63	Isoform 3 of Centrosomal protein of 63 kDa	CEP63_MOUSE	6	6	13	11	9	7	8	6	14	11	12	12	10	9	9	10	2	8	8	10	39079.6	30679.1	231983	94192.2	65262.8	61932.7	62612.1	45544.6	121045	207349	135430	89781.4	167729	66872.5	104197	108634	13909.8	79955.4	162412	70550.9	62628	Q3UPP8-3	Cep63		62628
78748.9	Q8C0D9	Cep68	Centrosomal protein of 68 kDa	CEP68_MOUSE	3	3	9	6	9	9	9	7	10	8	9	7	10	6	8	8	5	8	8	5	13558.1	7488.85	85284.7	42265.6	66150.2	53989.6	83086	53102.5	80979.6	84440.7	87200.4	37776.3	70563.2	41418.5	78256.5	87929.8	33274.8	59560	79194.9	39432.9	78748.9	Q8C0D9	Cep68		78748.9
74303.4	Q0VEJ0	Cep76	Centrosomal protein of 76 kDa	CEP76_MOUSE	3	4	4	4	7	6	4	0	9	7	9	2	7	5	10	9	2	4	4	4	13257.4	12271.2	23979.8	13478.6	61821.7	29013.3	19927.9	NaN	95463	67006.2	88012.4	7888.09	58506.2	31685.9	94130.9	105034	9091	24739.3	36020.7	26011.9	74303.4	Q0VEJ0	Cep76		74303.4
86889.6	Q6IRU7	Cep78	Centrosomal protein of 78 kDa	CEP78_MOUSE	0	0	7	5	5	4	2	0	4	0	0	4	6	4	4	3	1	8	6	6	NaN	NaN	87867.9	63454.9	32618.6	71357.6	24522.6	NaN	70469.1	NaN	NaN	33337.9	77930.5	43275.7	94483.1	35717.3	13899.1	54444.2	63280.3	53535.4	86889.6	Q6IRU7	Cep78		86889.6
81998	Q9D5R3	Cep83	Centrosomal protein of 83 kDa	CEP83_MOUSE	0	0	4	4	1	3	3	0	3	3	4	4	5	2	3	5	0	0	3	2	NaN	NaN	38193.2	24926.8	5778.83	27788.2	18661.6	NaN	26030.1	24446.9	38468.4	31817	33738.3	12878.6	24256.6	49956.6	NaN	NaN	15961.3	10731.1	81998	Q9D5R3	Cep83		81998
85339.7	Q8BMK0	Cep85	Centrosomal protein of 85 kDa	CEP85_MOUSE	6	0	8	8	5	5	5	5	6	7	8	8	6	4	8	7	0	2	5	0	32480.7	NaN	98518.6	90556.6	36854.6	37905.9	39589.1	24620.1	47819.6	64159.1	57569.2	61100.2	32965.5	20492.7	71443.7	53874.8	NaN	4143.42	24974	NaN	85339.7	Q8BMK0	Cep85		85339.7
95209.8	Q8BVV7	Cep95	Centrosomal protein of 95 kDa	CEP95_MOUSE	0	1	6	4	0	3	3	4	4	4	6	4	4	1	4	3	3	6	6	4	NaN	5963.44	48323.3	29333.7	NaN	25812.9	18462.4	17387.1	23922	32091.7	68605.9	31368.8	26570.1	7677.12	28348.4	21079.8	18850	47151.8	55571.8	30241.6	95209.8	Q8BVV7	Cep95		95209.8
94640.92;94640.92-2	Q9CZ62;Q9CZ62-2	Cep97	Centrosomal protein of 97 kDa;Isoform 2 of Centrosomal protein of 97 kDa	CEP97_MOUSE	0	0	2	0	3	4	5	2	0	3	5	0	5	3	3	3	0	4	4	0	NaN	NaN	34175.6	NaN	36580.8	24351.6	54783.7	8308.98	NaN	17777	72004.7	NaN	21335.4	27959.2	42244.5	18346.3	NaN	38542.7	45602.1	NaN	94640.9	Q9CZ62	Cep97		94640.9
46434.43;46434.43-2	Q8BGS7;Q8BGS7-2	Cept1	Choline/ethanolaminephosphotransferase 1;Isoform 2 of Choline/ethanolaminephosphotransferase 1	CEPT1_MOUSE	4	3	4	4	4	4	4	4	4	4	4	4	4	4	4	4	4	4	4	4	278092	235039	698329	538949	471151	388365	465863	362554	401991	452268	553110	384245	346475	290000	490408	502665	387726	476088	582733	533569	46434.4	Q8BGS7	Cept1		46434.4
59843.1	Q8K4Q7	Cerk	Ceramide kinase	CERK1_MOUSE	0	0	0	0	0	0	1	0	0	0	0	0	1	0	0	0	1	1	2	2	NaN	NaN	NaN	NaN	NaN	NaN	3954.73	NaN	NaN	NaN	NaN	NaN	7575.42	NaN	NaN	NaN	10361.2	5198.61	17422.5	21050.1	59843.1	Q8K4Q7	Cerk		59843.1
45024.4	Q924Z4	Cers2	Ceramide synthase 2	CERS2_MOUSE	5	5	6	5	6	5	5	6	6	5	5	5	5	4	5	5	4	5	5	5	207692	154732	496796	293462	392057	278415	380339	273031	336858	376388	455269	263394	260053	215405	428001	410029	170688	225501	288161	233016	45024.4	Q924Z4	Cers2		45024.4
46016.7	Q9D6J1	Cers4	Ceramide synthase 4	CERS4_MOUSE	1	0	3	0	1	0	0	0	0	0	2	2	0	0	0	0	0	2	0	0	8552.47	NaN	51469.2	NaN	7167.22	NaN	NaN	NaN	NaN	NaN	12837.9	24795.6	NaN	NaN	NaN	NaN	NaN	19665	NaN	NaN	46016.7	Q9D6J1	Cers4		46016.7
48166.68;48166.68-2	Q9D6K9;Q9D6K9-2	Cers5	Ceramide synthase 5;Isoform 2 of Ceramide synthase 5	CERS5_MOUSE	0	0	5	2	3	2	3	2	3	0	3	0	0	0	3	2	0	0	3	0	NaN	NaN	71685.6	7301.56	35205.3	21513.7	42358.8	23104.7	35801.4	NaN	42053.1	NaN	NaN	NaN	36666.8	23285.4	NaN	NaN	23548.4	NaN	48166.7	Q9D6K9	Cers5		48166.7
71111.2;71111.2-2	Q9EQG9;Q9EQG9-2	Cert1	Ceramide transfer protein;Isoform 2 of Ceramide transfer protein	CERT_MOUSE	12	11	14	12	15	12	13	14	12	12	12	10	14	11	10	11	9	7	11	9	197489	164495	446834	219775	344762	239455	337022	298899	265527	293418	357779	176827	249803	125302	276838	313826	166882	69463.4	268828	160900	71111.2	Q9EQG9	Cert1		71111.2
19796.5	Q9R1K9	Cetn2	Centrin-2	CETN2_MOUSE	10	9	8	10	10	9	10	10	10	10	10	9	9	8	10	9	9	10	10	10	318800	227200	573668	404792	539174	453400	598145	445658	657587	622659	556619	429894	425526	223648	674341	664349	365915	497705	653425	526343	19796.5	Q9R1K9	Cetn2		19796.5
19519	O35648	Cetn3	Centrin-3	CETN3_MOUSE	5	3	5	4	7	6	7	6	7	6	6	6	7	5	6	7	3	4	4	5	177723	95318.1	332763	208454	323372	287801	363905	251882	381392	397587	485686	351252	329886	247470	476008	455856	101899	142154	158586	189520	19519	O35648	Cetn3		19519
22748.4	Q8BTU1	Cfap20	Cilia- and flagella-associated protein 20	CFA20_MOUSE	6	4	6	6	5	6	4	5	5	5	4	4	5	4	5	4	4	6	6	6	96545.8	75149.8	247997	196838	169708	142438	180982	124842	197056	202531	218350	153176	164636	119002	213978	213112	183720	209917	289436	241850	22748.4	Q8BTU1	Cfap20		22748.4
33190	Q8BL95	Cfap298	Cilia- and flagella-associated protein 298	CF298_MOUSE	0	0	2	0	0	0	4	2	3	3	3	0	3	1	3	4	0	0	1	0	NaN	NaN	14199.9	NaN	NaN	NaN	90851.2	7798.14	19539.6	26375.5	37504.1	NaN	11093.5	1751.58	28105.7	108293	NaN	NaN	6461.25	NaN	33190	Q8BL95	Cfap298		33190
39599.9	Q8C6E0	Cfap36	Cilia- and flagella-associated protein 36	CFA36_MOUSE	0	0	2	0	0	1	7	2	5	6	5	2	7	0	8	5	3	4	4	4	NaN	NaN	25347.2	NaN	NaN	10294.1	67299.4	6278.23	39202.2	60811	43844.7	14042.9	54548.9	NaN	93166.5	69253	28077.1	36036.5	43325.2	40744.7	39599.9	Q8C6E0	Cfap36		39599.9
23847.9	Q3UJP5	Cfap418	Cilia- and flagella-associated protein 418	CF418_MOUSE	0	0	0	0	0	0	0	2	3	2	0	0	3	1	2	2	0	1	2	2	NaN	NaN	NaN	NaN	NaN	NaN	NaN	31636.4	57220.6	41277.4	NaN	NaN	39206.6	4930.72	58077.6	52911	NaN	3997.87	44354.6	43290.1	23847.9	Q3UJP5	Cfap418		23847.9
32921.2	O88271	Cfdp1	Craniofacial development protein 1	CFDP1_MOUSE	10	9	9	8	10	10	10	10	10	10	10	10	10	10	10	10	9	9	9	10	390038	295558	682966	455111	621004	663893	787374	577726	841124	927954	1.05125e+06	638376	738113	563879	980401	914676	456881	389935	598716	490633	32921.2	O88271	Cfdp1		32921.2
18559.5	P18760	Cfl1	Cofilin-1	COF1_MOUSE	19	20	25	23	23	22	22	21	22	24	23	21	24	20	22	21	17	20	22	21	13329951	10258938	24866858	16963714	24833572	21512728	29012836	20490954	27651160	28708184	31433148	23381460	26646716	19212156	35317052	32759784	30545606	27082620	39016776	29993764	18559.5	P18760	Cfl1		18559.5
18709.6	P45591	Cfl2	Cofilin-2	COF2_MOUSE	0	0	0	0	0	0	1	0	0	0	0	0	0	0	3	0	0	0	2	0	NaN	NaN	NaN	NaN	NaN	NaN	4007.25	NaN	NaN	NaN	NaN	NaN	NaN	NaN	44692.2	NaN	NaN	NaN	10735.9	NaN	18709.6	P45591	Cfl2		18709.6
54874.73;54874.73-2	O35732;O35732-2	Cflar	CASP8 and FADD-like apoptosis regulator;Isoform 2 of CASP8 and FADD-like apoptosis regulator	CFLAR_MOUSE	2	1	3	2	2	2	0	3	2	3	1	2	3	2	2	0	0	0	0	1	10653.6	8787.29	49131.2	22998.5	20859.5	18820.7	NaN	17709.9	28532.4	34166.9	19733.8	26930.7	33178	16859.4	13401.6	NaN	NaN	NaN	NaN	1562.67	54874.7	O35732	Cflar		54874.7
50327.2	P11680	Cfp	Properdin	PROP_MOUSE	0	3	4	1	6	3	7	3	6	6	6	0	7	5	6	7	0	0	0	0	NaN	10594.5	48806.3	5063.68	46458.4	32061.4	73573.2	34501.6	58259.9	73893.4	91199.4	NaN	60181.8	32240.2	88908.1	90743.9	NaN	NaN	NaN	NaN	50327.2	P11680	Cfp		50327.2
18761.3	Q8BHG9	Cggbp1	CGG triplet repeat-binding protein 1	CGBP1_MOUSE	10	10	13	10	11	11	12	12	11	11	11	8	12	10	11	10	10	12	12	11	354366	284521	763607	443110	634617	532861	691174	525489	577490	618249	691840	354667	546671	409105	706758	700049	748089	804306	1062566	781255	18761.3	Q8BHG9	Cggbp1		18761.3
101936	Q9QWF0	Chaf1a	Chromatin assembly factor 1 subunit A	CAF1A_MOUSE	4	0	6	5	9	9	10	9	13	13	15	9	14	9	14	12	0	0	5	0	47928.5	NaN	102794	64693.6	134134	104546	171468	134789	280888	308665	398271	89845	270495	125949	313740	295499	NaN	NaN	48969.7	NaN	101936	Q9QWF0	Chaf1a		101936
63132.2	Q9D0N7	Chaf1b	Chromatin assembly factor 1 subunit B	CAF1B_MOUSE	8	7	14	7	12	13	12	9	15	14	15	11	15	13	15	16	0	3	5	0	54535.4	33216.4	210458	57440.6	179259	153392	196421	114678	385287	333825	492075	110102	322509	207515	442911	421600	NaN	17154.4	40085.7	NaN	63132.2	Q9D0N7	Chaf1b		63132.2
87561.1	Q8K327	Champ1	Chromosome alignment-maintaining phosphoprotein 1	CHAP1_MOUSE	20	20	26	8	27	21	25	25	27	29	28	7	27	20	28	28	22	27	24	27	432721	333117	738488	102585	806708	444702	695262	557605	871653	1.05879e+06	926035	78617.2	708631	366013	931366	996642	602828	732986	813074	736264	87561.1	Q8K327	Champ1		87561.1
13607.9	Q9CQA6	Chchd1	Small ribosomal subunit protein mS37	CHCH1_MOUSE	2	2	2	2	2	2	2	2	2	2	2	2	2	2	2	2	2	2	2	2	31079.5	27177.6	62084.5	43161.8	42329.4	25323.2	45673.6	30640.5	41107.3	54334.5	69414.6	21336	37856.4	23420.8	55108.6	57232	27984.9	26509.4	43505.2	30879	13607.9	Q9CQA6	Chchd1		13607.9
10015.27;13812.63;13812.67	Q2V056;Q7TNL9;Q8BW15	Chchd10	Q2CHCH domain-containing protein;Q7Coiled-coil-helix-coiled-coil-helix domain containing 10;Q8Coiled-coil-helix-coiled-coil-helix domain-containing protein 10, mitochondrial	Q2V056_MOU;Q7TNL9_MOU;Q8BW15_MOU	0	0	1	0	0	0	0	0	0	0	0	0	1	0	0	0	0	0	0	0	NaN	NaN	3988.486572265625	NaN	NaN	NaN	NaN	NaN	NaN	NaN	NaN	NaN	3362.31	NaN	NaN	NaN	NaN	NaN	NaN	NaN	10015.3	Q2V056	Chchd10		10015.3
26334.5	Q9CRB9	Chchd3	MICOS complex subunit Mic19	MIC19_MOUSE	6	7	9	11	5	7	8	8	8	8	7	9	10	7	7	7	6	7	8	6	542651	455279	1.34146e+06	1.18208e+06	781275	861989	1.04453e+06	718320	1.06878e+06	1.16309e+06	1.41753e+06	838002	953050	632220	1.21764e+06	1.08964e+06	843719	848602	1.20282e+06	1012124	26334.5	Q9CRB9	Chchd3		26334.5
15525	Q8VEA4	Chchd4	Mitochondrial intermembrane space import and assembly protein 40	MIA40_MOUSE	0	0	2	2	0	1	2	2	2	2	2	2	2	1	2	2	0	1	1	0	NaN	NaN	27479.3	24906.8	NaN	15035.4	26241.7	16036	34509.6	25030.9	42380.2	20488.1	34631.8	11137.6	44877.1	55047.2	NaN	10883.4	14322.1	NaN	15525	Q8VEA4	Chchd4		15525
29851.8	Q91VN4	Chchd6	MICOS complex subunit Mic25	MIC25_MOUSE	4	3	3	4	4	4	3	4	3	3	4	4	4	3	4	4	2	3	3	3	109249	88065.2	207619	152619	167398	137845	163603	117834	172258	185473	234661	137122	130429	90245.9	202284	199752	22859.3	102521	138749	48748.2	29851.8	Q91VN4	Chchd6		29851.8
10101.5	Q8K2Q5	Chchd7	Coiled-coil-helix-coiled-coil-helix domain-containing protein 7	CHCH7_MOUSE	0	0	1	0	0	0	0	0	1	1	1	0	1	1	1	1	0	0	0	0	NaN	NaN	18307.4	NaN	NaN	NaN	NaN	NaN	23751.2	27195.4	37314.5	NaN	20013	14772.4	30534.8	32387.3	NaN	NaN	NaN	NaN	10101.5	Q8K2Q5	Chchd7		10101.5
196385	P40201	Chd1	Chromodomain-helicase-DNA-binding protein 1	CHD1_MOUSE	31	28	34	30	35	35	32	32	36	35	35	34	36	29	37	36	20	29	31	30	409016	345173	819250	533153	668612	613322	687388	506911	838377	902699	1.09389e+06	606387	653571	447650	938627	884900	247749	408868	582826	478250	196385	P40201	Chd1		196385
101438	Q9CXF7	Chd1l	Chromodomain-helicase-DNA-binding protein 1-like	CHD1L_MOUSE	15	17	21	15	20	17	19	22	19	20	22	19	23	17	19	18	13	16	17	16	183212	158887	472105	245576	407100	331265	425898	355558	470001	526437	631880	291965	392087	280282	526718	515036	173529	229666	297467	240871	101438	Q9CXF7	Chd1l		101438
210804	E9PZM4	Chd2	Chromodomain-helicase-DNA-binding protein 2	CHD2_MOUSE	21	15	28	27	26	23	24	22	22	26	25	24	28	20	25	24	21	30	30	29	200114	150820	552949	404271	414661	309850	359166	280284	378851	496636	480296	347106	361453	208587	415450	506135	489246	600690	730834	586661	210804	E9PZM4	Chd2		210804
232745.67;228972.67	B1AR17;E9Q614	Chd3	B1DNA helicase;E9DNA helicase	B1AR17_MOU;E9Q614_MOU	28	26	39	35	33	35	33	29	37	39	37	37	34	26	36	34	25	40	39	37	653906	543528	1.85325e+06	1.16194e+06	1176444	1.20092e+06	1.28686e+06	977481	1.38125e+06	1.60556e+06	1.7883e+06	1.20166e+06	1.40784e+06	851105	1.65416e+06	1.61398e+06	1.00015e+06	1.19468e+06	1.58953e+06	1.34359e+06	232746	B1AR17	Chd3		232746
217751	Q6PDQ2	Chd4	Chromodomain-helicase-DNA-binding protein 4	CHD4_MOUSE	58	60	69	63	58	61	59	63	59	59	61	59	65	58	60	58	49	58	59	56	2584846	2.0928e+06	5607283	3.44788e+06	4.2387e+06	3700385	4.58796e+06	3.43448e+06	5028358	5.52774e+06	6180501	3.52678e+06	4.61088e+06	3.12739e+06	5824453	5.60579e+06	3.48777e+06	3.76855e+06	4.85841e+06	3.84736e+06	217751	Q6PDQ2	Chd4		217751
334061	A2AJK6	Chd7	Chromodomain-helicase-DNA-binding protein 7	CHD7_MOUSE	13	11	22	17	18	17	19	17	22	18	27	17	23	10	21	24	10	11	17	12	151413	108883	597222	274947	278538	263947	339365	231418	419908	386158	559482	222522	331087	173051	408730	552662	152049	190038	297427	212040	334061	A2AJK6	Chd7		334061
290847	Q09XV5	Chd8	Chromodomain-helicase-DNA-binding protein 8	CHD8_MOUSE	35	33	43	35	43	36	42	36	40	43	44	39	43	38	41	41	31	39	44	40	391758	297206	887410	503807	711465	639010	795992	533525	805891	921765	977754	517210	792178	529550	1.0082e+06	949427	565922	587046	831301	674046	290847	Q09XV5	Chd8		290847
323859.94;323859.94-2	Q8BYH8;Q8BYH8-2	Chd9	Chromodomain-helicase-DNA-binding protein 9;Isoform 2 of Chromodomain-helicase-DNA-binding protein 9	CHD9_MOUSE	0	3	5	4	9	4	6	5	7	8	10	6	9	4	7	10	9	11	16	10	NaN	56382.3	67529.6	19331.5	85232.4	41712.2	63875.6	47027.5	75893.8	94067.2	114680	63346.8	72561.1	36944	117474	121998	121383	86962.7	164286	89193.3	323860	Q8BYH8	Chd9		323860
54381.4	O35280	Chek1	Serine/threonine-protein kinase Chk1	CHK1_MOUSE	14	10	16	14	14	15	15	15	16	16	16	15	16	15	16	16	0	0	0	0	207238	109505	442138	209138	327880	451239	494437	360422	734163	736609	837797	327007	568084	458974	798597	721383	NaN	NaN	NaN	NaN	54381.4	O35280	Chek1		54381.4
61088.3	Q9Z265	Chek2	Serine/threonine-protein kinase Chk2	CHK2_MOUSE	4	0	3	4	5	3	5	3	4	4	5	5	5	4	4	4	4	4	4	0	21501.1	NaN	29115.1	34576	45812.5	46368.8	62144.4	27578.3	56307.2	64618.7	76117.5	47789.7	53544.5	37656.8	70223	60882	54710.3	50148.7	52035.2	NaN	61088.3	Q9Z265	Chek2		61088.3
106169	Q8CGZ0	Cherp	Calcium homeostasis endoplasmic reticulum protein	CHERP_MOUSE	22	21	24	25	23	23	22	21	23	24	24	24	24	21	22	26	17	23	21	23	877777	556844	1.8441e+06	1.39137e+06	1.271e+06	1.12313e+06	1.29123e+06	897537	1.37686e+06	1.60618e+06	1.80834e+06	1.10337e+06	1.41382e+06	990726	1.67672e+06	1.66592e+06	974151	1.15167e+06	1.22651e+06	1082306	106169	Q8CGZ0	Cherp		106169
73871.23;73871.23-2;73871.23-3	Q810L3;Q810L3-2;Q810L3-3	Chfr	E3 ubiquitin-protein ligase CHFR;Isoform 2 of E3 ubiquitin-protein ligase CHFR;Isoform 3 of E3 ubiquitin-protein ligase CHFR	CHFR_MOUSE	0	0	1	0	0	0	0	0	0	0	1	0	0	0	2	0	0	0	3	1	NaN	NaN	6471.72	NaN	NaN	NaN	NaN	NaN	NaN	NaN	7412.19	NaN	NaN	NaN	13415	NaN	NaN	NaN	15367.4	8681.48	73871.2	Q810L3	Chfr		73871.2
19282.4	Q9D9G3	Chic2	Cysteine-rich hydrophobic domain-containing protein 2	CHIC2_MOUSE	0	2	2	4	2	2	3	0	2	3	3	2	2	2	3	0	2	0	2	0	NaN	12222.4	70090.7	70710.8	41445.1	31495.1	59788.8	NaN	40053.8	62901.5	76297.1	41289.4	42424.3	37271.6	68232.8	NaN	31001.1	NaN	33816.4	NaN	19282.4	Q9D9G3	Chic2		19282.4
44905.6	Q922Q9	Chid1	Chitinase domain-containing protein 1	CHID1_MOUSE	7	5	7	7	6	7	7	8	8	9	8	4	8	7	8	7	6	7	7	8	61746.9	49445.4	118117	59659.3	77941.2	99906.4	129321	99805.2	107527	113084	148861	28955.1	96318.4	63495.3	147182	121074	93494.8	106971	138359	119008	44905.6	Q922Q9	Chid1		44905.6
44458.3	O35744	Chil3	Chitinase-like protein 3	CHIL3_MOUSE	0	0	0	0	0	0	0	0	0	0	0	0	0	0	0	0	0	3	4	0	NaN	NaN	NaN	NaN	NaN	NaN	NaN	NaN	NaN	NaN	NaN	NaN	NaN	NaN	NaN	NaN	NaN	14269.8	43110	NaN	44458.3	O35744	Chil3		44458.3
51984.56;51984.56-2	O54804;O54804-2	Chka	Choline kinase alpha;Isoform 2 of Choline kinase alpha	CHKA_MOUSE	3	0	4	5	4	0	0	0	4	4	0	7	4	5	3	5	0	0	0	0	12054.6	NaN	48200	39190	30742	NaN	NaN	NaN	34100.4	36801.5	NaN	60916.4	35194.2	38456.1	38406.9	47982.2	NaN	NaN	NaN	NaN	51984.6	O54804	Chka		51984.6
45126.1	O55229	Chkb	Choline/ethanolamine kinase	CHKB_MOUSE	7	5	10	9	7	8	8	7	5	7	7	7	7	6	7	8	5	9	9	6	64808.8	44607.6	144321	106130	129561	106428	149985	106700	93168.9	130707	152231	94508.3	94718.1	95888.3	163187	156951	118208	124569	197418	119705	45126.1	O55229	Chkb		45126.1
73977	Q9QXG2	Chm	Rab proteins geranylgeranyltransferase component A 1	RAE1_MOUSE	8	6	11	10	13	12	11	12	10	10	11	10	12	11	10	9	7	9	11	9	92769.7	62730.6	227310	116486	200337	163623	219898	157997	181272	213851	232196	148477	197375	144476	246357	233580	104612	113355	192957	135757	73977	Q9QXG2	Chm		73977
21607.6	Q921W0	Chmp1a	Charged multivesicular body protein 1a	CHM1A_MOUSE	5	5	7	5	5	5	5	7	5	5	6	5	5	5	5	5	5	5	5	5	200974	153359	391931	323425	408860	316108	390498	419729	414678	424625	536545	383983	381697	265461	469196	461514	446467	422421	561098	427001	21607.6	Q921W0	Chmp1a		21607.6
24403.61;22124.33	Q3TJ28;Q99LU0	Chmp1b;Chmp1b1	Q3Charged multivesicular body protein 1b (Fragment);CH1Charged multivesicular body protein 1B1	Q3TJ28_MOU;CH1B1_MO	4	4	4	4	4	4	4	4	4	4	4	4	4	4	4	4	4	4	4	4	348699	265709	592988	353278	659052	557441	636472	515263	642318	652227	735812	596500	580802	401545	799339	715356	597762	828202	1.1022e+06	948734	24403.6	Q3TJ28	Chmp1b		24403.6
22161.3	Q9CQD4	Chmp1b2	CH1Charged multivesicular body protein 1B2	CH1B2_MO	2	2	2	1	2	2	2	2	2	2	2	2	1	1	2	1	1	2	0	0	85737.1	61860.3	142928	70848.4	154683	97681.3	132916	104415	145869	164807	169407	133805	68697.5	46876.5	194116	74613.5	87564.9	173905	NaN	NaN	22161.3	Q9CQD4	Chmp1b2		22161.3
25134	Q9DB34	Chmp2a	Charged multivesicular body protein 2a	CHM2A_MOUSE	9	9	9	9	9	9	9	9	9	9	8	9	9	9	9	9	6	9	9	8	315061	328115	681388	514444	725403	522577	733776	539213	637070	600875	683734	463859	562731	404670	772416	799362	484947	457242	690288	539734	25134	Q9DB34	Chmp2a		25134
23934.5	Q8BJF9	Chmp2b	Charged multivesicular body protein 2b	CHM2B_MOUSE	2	2	3	3	2	3	3	2	2	3	2	4	3	4	4	2	2	4	2	2	42832.1	32837.1	98525.1	135392	69761.9	86202.1	127694	57798	65973	103321	75451.8	130756	90642.6	98075.4	135536	75923.5	62586.9	81677.9	85983.7	69161.9	23934.5	Q8BJF9	Chmp2b		23934.5
25219.1	Q9CQ10	Chmp3	Charged multivesicular body protein 3	CHMP3_MOUSE	6	6	7	6	7	8	8	6	7	7	7	7	7	7	7	7	6	7	7	7	148591	144898	421572	301889	326302	308577	404049	253739	347652	357204	452651	361525	351605	251245	450737	413191	249754	255150	368906	300966	25219.1	Q9CQ10	Chmp3		25219.1
24936.1	Q9D8B3	Chmp4b	Charged multivesicular body protein 4b	CHM4B_MOUSE	10	11	9	9	11	11	11	11	11	10	10	10	10	11	11	11	10	10	10	10	483071	520194	1.0841e+06	743089	934472	913220	1.12707e+06	834902	943152	1.04816e+06	1.13475e+06	797887	904592	660710	1.21652e+06	1168658	643961	640098	850280	701553	24936.1	Q9D8B3	Chmp4b		24936.1
24575.7	Q9D7S9	Chmp5	Charged multivesicular body protein 5	CHMP5_MOUSE	4	3	4	5	5	3	5	3	4	5	5	5	5	4	4	3	4	5	5	4	95542.8	71005.1	286984	310854	215287	195953	254624	159962	216699	271974	311612	267131	178704	178150	286358	237926	192799	185841	238774	173714	24575.7	Q9D7S9	Chmp5		24575.7
23415.6	P0C0A3	Chmp6	Charged multivesicular body protein 6	CHMP6_MOUSE	3	3	4	4	4	4	4	3	4	4	4	4	4	4	4	4	3	3	4	4	47146.6	41541.5	135990	61798.1	108966	69689.1	88816.8	66318.4	110136	115572	134356	59343.3	94131.7	58176.2	119232	143130	62217.6	66346.7	96400	70091.9	23415.6	P0C0A3	Chmp6		23415.6
50632.6	Q8R1T1	Chmp7	Charged multivesicular body protein 7	CHMP7_MOUSE	7	7	9	9	7	5	8	6	8	7	8	7	8	6	8	8	0	5	6	5	56564.8	46722	136301	118338	122575	40527	114213	78707.8	116808	105339	153175	103408	96944.2	64040.6	157259	109779	NaN	52765.1	82232.1	44996	50632.6	Q8R1T1	Chmp7		50632.6
37350.6	Q9D1P4	Chordc1	Cysteine and histidine-rich domain-containing protein 1	CHRD1_MOUSE	16	14	16	14	17	18	18	18	17	17	18	17	17	16	18	18	13	16	14	15	614186	480893	1.34648e+06	651844	1.06111e+06	1068727	1.465e+06	1.07512e+06	1512321	1.73194e+06	1.99403e+06	963704	1.30443e+06	984351	1.82639e+06	1.81045e+06	512063	631319	945123	691913	37350.6	Q9D1P4	Chordc1		37350.6
22432.1	P61022	Chp1	Calcineurin B homologous protein 1	CHP1_MOUSE	6	4	7	8	8	5	7	6	6	8	6	5	5	5	6	7	4	7	6	5	183985	39064.7	396389	323920	333447	73391.9	328487	244210	116464	370298	143949	103512	102184	204917	165718	381133	92152.4	354171	141277	107806	22432.1	P61022	Chp1		22432.1
85534.2	Q6IQX7	Chpf	Chondroitin sulfate synthase 2	CHSS2_MOUSE	0	0	0	0	0	0	0	0	0	0	1	1	0	0	1	0	0	0	0	0	NaN	NaN	NaN	NaN	NaN	NaN	NaN	NaN	NaN	NaN	13548.6	9223.56	NaN	NaN	7677.7	NaN	NaN	NaN	NaN	NaN	85534.2	Q6IQX7	Chpf		85534.2
14127.1	Q9JKP8	Chrac1	Chromatin accessibility complex protein 1	CHRC1_MOUSE	3	5	4	4	4	4	4	3	4	4	3	4	3	4	6	3	3	4	4	4	90127.4	83492.4	319529	200749	141027	129103	165530	116582	186866	208386	236241	138496	171381	130549	213440	192006	121250	111684	161323	131864	14127.1	Q9JKP8	Chrac1		14127.1
54914.2	P20782	Chrne	Acetylcholine receptor subunit epsilon	ACHE_MOUSE	0	0	1	1	0	1	0	1	1	1	0	0	1	0	1	1	1	0	1	0	NaN	NaN	41224.9	26780.5	NaN	32952.1	NaN	38407.9	40064.8	38112.5	NaN	NaN	33940.3	NaN	48576.9	51984.8	57956.7	NaN	67259.5	NaN	54914.2	P20782	Chrne		54914.2
53997.1	O88199	Chst3	Carbohydrate sulfotransferase 3	CHST3_MOUSE	7	4	6	8	7	9	8	7	7	8	8	7	8	8	6	7	5	9	9	8	62687.6	22601.3	93582.5	235752	153315	237525	191088	114050	116208	124603	149143	104648	129052	268474	152629	179901	99743.2	178726	233753	193953	53997.1	O88199	Chst3		53997.1
108137	Q8BIW9	Chtf18	Chromosome transmission fidelity protein 18 homolog	CTF18_MOUSE	3	3	5	4	9	8	10	7	11	12	13	4	14	9	13	13	2	5	4	4	14662.1	16771.3	52320.6	34339.2	101285	89035.3	133166	55768.5	180983	196516	281483	38492.2	188264	99395	223309	244937	16929.7	29067.4	32334.6	28422.2	108137	Q8BIW9	Chtf18		108137
13227.5	P0CG15	Chtf8	Chromosome transmission fidelity protein 8 homolog	CTF8_MOUSE	0	0	1	0	0	0	2	2	2	1	2	0	2	1	2	2	0	0	0	0	NaN	NaN	3727.517822265625	NaN	NaN	NaN	19107.5	16071.8	20725.6	11893.3	26357.7	NaN	28904.9	12247.8	24194.2	24641.2	NaN	NaN	NaN	NaN	13227.5	P0CG15	Chtf8		13227.5
26584.85;26584.85-3	Q9CY57;Q9CY57-3	Chtop	Chromatin target of PRMT1 protein;Isoform 3 of Chromatin target of PRMT1 protein	CHTOP_MOUSE	7	7	8	8	7	6	7	7	7	7	7	7	7	6	7	7	6	7	7	7	468600	407618	1.43096e+06	1.20294e+06	745379	699247	826771	630166	878684	975387	1.11927e+06	1.14104e+06	925051	484541	932823	950951	662993	854108	1.12728e+06	960809	26584.8	Q9CY57	Chtop		26584.8
84728.9	Q60680	Chuk	Inhibitor of nuclear factor kappa-B kinase subunit alpha	IKKA_MOUSE	17	12	22	21	21	14	22	19	20	19	20	23	19	16	22	21	13	19	20	19	415431	283168	1.02242e+06	707072	697366	498280	874221	578700	798839	849557	940912	831309	737536	540620	928386	915853	435468	512858	663645	615190	84728.9	Q60680	Chuk		84728.9
12857.7	Q6DG52	Churc1	Protein Churchill	CHUR_MOUSE	0	0	3	1	3	3	3	3	3	3	3	0	3	1	3	3	2	3	3	3	NaN	NaN	50067.6	7213.44	51850.3	37348.9	69817.6	69920.3	66582.7	77001.5	92487.6	NaN	66635.9	13126.4	129428	134450	26486.1	24558.1	42141.4	39047.8	12857.7	Q6DG52	Churc1		12857.7
37632.7	Q99KN2	Ciao1	Probable cytosolic iron-sulfur protein assembly protein CIAO1	CIAO1_MOUSE	10	7	11	11	9	11	11	10	10	11	12	11	11	10	10	10	6	8	11	9	139641	77602	268162	190274	213017	213273	290157	214934	263022	294454	350454	266733	258622	187545	339352	338070	110683	112723	197803	165455	37632.7	Q99KN2	Ciao1		37632.7
18418.1	Q9DCL2	Ciao2a	Cytosolic iron-sulfur assembly component 2A	CIA2A_MOUSE	2	0	2	2	3	2	4	3	3	3	3	2	2	2	3	2	1	1	3	2	21615.8	NaN	48292.6	19977.5	38424.2	26506.3	58184.9	49508.7	59964.6	53185.1	74250.2	25601.9	40951.3	25970	75585.2	77536.8	11605.6	11972.4	38203.7	23702.5	18418.1	Q9DCL2	Ciao2a		18418.1
53108.1	Q7TMW6	Ciao3	Cytosolic iron-sulfur assembly component 3	CIAO3_MOUSE	9	5	14	14	14	12	12	13	14	12	13	15	13	13	16	12	8	9	13	13	69731.3	33268.2	237714	195733	209941	190613	230211	183930	254116	212347	278339	277606	209966	192246	302270	230373	120371	101560	203791	163760	53108.1	Q7TMW6	Ciao3		53108.1
33428.9	Q8WTY4	Ciapin1	Anamorsin	CPIN1_MOUSE	10	8	10	10	11	11	12	11	11	10	11	9	11	11	11	12	8	8	10	10	221862	152720	440693	242054	350056	387353	493423	384631	498426	521400	499499	314376	473997	328599	596679	598330	194589	176542	256599	230476	33428.9	Q8WTY4	Ciapin1		33428.9
21763.4	Q9Z0F4	Cib1	Calcium and integrin-binding protein 1	CIB1_MOUSE	0	0	3	0	2	3	3	0	5	3	2	1	3	2	5	5	0	0	1	2	NaN	NaN	12045.5	NaN	11811.5	24381.5	17244.2	NaN	29516.9	36058.4	15529.2	2594.4	24425.3	3389.014404296875	72609.6	60169.9	NaN	NaN	2031.73	8746.79	21763.4	Q9Z0F4	Cib1		21763.4
258130	Q924A2	Cic	Protein capicua homolog	CIC_MOUSE	6	0	14	17	11	13	13	10	11	15	14	14	15	12	12	10	12	17	21	12	43366.7	NaN	155286	132422	92361	100867	153488	82275.1	97090.8	167124	172123	102144	122360	89299.4	125518	111818	122863	145341	252445	152699	258130	Q924A2	Cic		258130
24103.5	Q9D0V8	Cinp	Cyclin-dependent kinase 2-interacting protein	CINP_MOUSE	0	0	2	2	0	0	0	0	3	4	2	3	3	0	4	3	0	0	2	0	NaN	NaN	10528.6	14395.5	NaN	NaN	NaN	NaN	17604.2	16816.2	14734.5	13898.8	10693.9	NaN	22005.7	17354	NaN	NaN	6447.15	NaN	24103.5	Q9D0V8	Cinp		24103.5
102043	Q8BWY9	Cip2a	Protein CIP2A	CIP2A_MOUSE	0	0	4	2	5	8	8	3	14	12	12	8	11	7	10	13	0	0	3	0	NaN	NaN	24660.3	9424.94	45925.5	67759.4	76597.6	24657.2	289188	291635	297574	125892	249628	156347	310056	232595	NaN	NaN	18360.2	NaN	102043	Q8BWY9	Cip2a		102043
51837.9	Q9DA19	Cir1	Corepressor interacting with RBPJ 1	CIR1_MOUSE	4	2	4	4	5	5	5	3	4	5	5	5	5	0	5	5	3	4	5	6	45075.7	31310.2	101069	84713	68402.5	55226.6	64794.4	46054.9	82299.4	65247	95758.1	79496.9	52752	NaN	92268.6	94371.5	53822.2	66688.2	99702.5	91916.7	51837.9	Q9DA19	Cir1		51837.9
18607	P60824	Cirbp	Cold-inducible RNA-binding protein	CIRBP_MOUSE	4	4	5	4	5	4	4	5	4	4	4	5	4	4	5	4	6	6	5	5	166789	109619	263771	230119	286568	203721	270678	193638	238331	247379	273601	232584	217409	158861	274238	274213	384821	375974	508090	389531	18607	P60824	Cirbp		18607
12097	Q91WS0	Cisd1	CDGSH iron-sulfur domain-containing protein 1	CISD1_MOUSE	5	5	6	6	4	5	4	5	5	4	4	5	5	5	4	4	4	5	4	4	456173	336259	1.03454e+06	841387	639001	609382	733276	476410	781932	828690	963503	755858	689556	502353	877764	878392	491322	638686	785562	629600	12097	Q91WS0	Cisd1		12097
15242.1	Q9CQB5	Cisd2	CDGSH iron-sulfur domain-containing protein 2	CISD2_MOUSE	7	8	8	8	8	8	8	8	8	7	8	8	8	7	8	7	7	8	6	7	665632	530029	1.60288e+06	1.70254e+06	989562	851268	1.12011e+06	773782	1.10077e+06	1127553	1.29504e+06	1.1907e+06	924761	782321	1.15663e+06	1.07971e+06	1.07632e+06	1.20232e+06	1457264	1.14598e+06	15242.1	Q9CQB5	Cisd2		15242.1
15676.2	B1AR13	Cisd3	CDGSH iron-sulfur domain-containing protein 3, mitochondrial	CISD3_MOUSE	4	5	5	6	6	6	6	5	5	5	6	6	6	5	5	5	4	5	6	6	69324.9	60234.7	178792	179872	152579	126139	163826	121388	72612.5	119773	145411	116338	127449	89373	150005	141452	118477	155105	190453	144482	15676.2	B1AR13	Cisd3		15676.2
235389.33;235389.33-5	P49025;P49025-5	Cit	Citron Rho-interacting kinase;Isoform 5 of Citron Rho-interacting kinase	CTRO_MOUSE	1	0	3	0	6	0	12	7	14	14	19	8	17	6	17	16	0	0	2	0	2014.58	NaN	15797.1	NaN	57543.7	NaN	99771.6	49344.2	126952	126936	167092	47490.8	128930	27559.8	182733	163098	NaN	NaN	6294.6	NaN	235389	P49025	Cit		235389
87488.44;78019.81	Q3UUV0;Q70KX6	Ciz1	Q3CDKN1A interacting zinc finger protein 1;Q70Cip1-interacting zinc-finger protein	Q3UUV0_MOU;Q70KX6_MO	4	3	10	0	9	11	10	8	8	9	9	4	11	4	10	10	9	9	13	10	20327.1	18558.5	104617	NaN	114083	114876	99059.6	105727	86305	114198	119235	15452.4	125271	30139.6	95842	181626	146885	123499	217188	147036	87488.4	Q3UUV0	Ciz1		87488.4
74029.2	Q3V1H1	Ckap2	Cytoskeleton-associated protein 2	CKAP2_MOUSE	2	4	5	5	5	5	7	7	9	10	8	8	10	7	7	8	0	0	0	0	11784.5	11330.9	48662.5	42914.9	22320.9	51874.8	60843.7	46319.8	118135	121337	144116	75756.4	105308	55051.1	112798	119530	NaN	NaN	NaN	NaN	74029.2	Q3V1H1	Ckap2		74029.2
82999.4	Q7TS74	Ckap2l	Cytoskeleton-associated protein 2-like	CKP2L_MOUSE	0	0	0	0	0	0	4	3	5	3	5	0	0	4	4	5	0	0	0	0	NaN	NaN	NaN	NaN	NaN	NaN	22728	13283.8	32146.7	21451.7	46428.5	NaN	NaN	19874.5	46985.1	38902.5	NaN	NaN	NaN	NaN	82999.4	Q7TS74	Ckap2l		82999.4
63692.1	Q8BMK4	Ckap4	Cytoskeleton-associated protein 4	CKAP4_MOUSE	22	21	23	22	22	21	22	22	22	21	22	21	21	20	22	21	18	23	22	22	449977	601888	1.32304e+06	964358	939688	1.0904e+06	1.06647e+06	889481	916877	907491	1.18482e+06	586173	676842	714282	1.05651e+06	985652	594487	968900	1.29792e+06	1.11688e+06	63692.1	Q8BMK4	Ckap4		63692.1
225634.64;225634.64-2;225634.64-3	A2AGT5;A2AGT5-2;A2AGT5-3	Ckap5	Cytoskeleton-associated protein 5;Isoform 2 of Cytoskeleton-associated protein 5;Isoform 3 of Cytoskeleton-associated protein 5	CKAP5_MOUSE	68	62	76	74	68	69	67	70	71	73	73	69	74	69	72	73	48	68	66	65	1.3922e+06	1.03935e+06	2.65605e+06	2.04699e+06	2.39252e+06	2066716	2.43664e+06	1.99702e+06	3.02462e+06	3.17943e+06	3.73873e+06	1.94556e+06	2.67919e+06	1871460	3.23218e+06	3341581	1004783	1812332	2.46315e+06	1.89989e+06	225635	A2AGT5	Ckap5		225635
9660.17	P61025	Cks1b	Cyclin-dependent kinases regulatory subunit 1	CKS1_MOUSE	0	0	2	2	2	1	1	0	2	2	2	1	2	2	2	2	0	0	0	0	NaN	NaN	17627.7	7186.66	12721	6905.53	7445.41	NaN	32210.6	37501.8	29857.5	7980.82	34187.1	15187.6	44388	22917.1	NaN	NaN	NaN	NaN	9660.17	P61025	Cks1b		9660.17
9874.36	P56390	Cks2	Cyclin-dependent kinases regulatory subunit 2	CKS2_MOUSE	0	0	3	0	0	0	0	1	1	2	1	0	0	1	3	2	0	0	0	0	NaN	NaN	37490.2	NaN	NaN	NaN	NaN	24885.8	2598.887939453125	40272.2	6887.61	NaN	NaN	29643.5	57793	46648.7	NaN	NaN	NaN	NaN	9874.36	P56390	Cks2		9874.36
169227	Q80TV8	Clasp1	CLIP-associating protein 1	CLAP1_MOUSE	35	25	39	34	38	37	40	39	37	41	39	38	38	33	39	38	20	26	32	31	513371	334868	1.01616e+06	516517	825957	667363	958323	780989	921076	1.04189e+06	1.10251e+06	610970	765613	458466	1159342	1.15347e+06	222278	328713	518382	392854	169227	Q80TV8	Clasp1		169227
66369.5	Q8BRT1-5	Clasp2	Isoform 2 of CLIP-associating protein 2	CLAP2_MOUSE	4	3	7	6	7	7	7	6	7	6	7	7	7	5	8	8	6	6	7	6	49077.7	28066.2	118440	74330.4	107761	86596.8	112364	76774.2	103205	103142	120118	86959.4	97882.3	61222.1	150534	159918	79399	61479.9	113379	69610	66369.5	Q8BRT1-5	Clasp2		66369.5
140739	Q8BRT1	Clasp2	CLIP-associating protein 2	CLAP2_MOUSE	28	25	37	33	33	34	32	32	30	31	33	30	36	32	31	31	26	31	31	32	360525	272456	906859	580309	710142	698208	781633	592674	709260	779928	948774	532406	703574	494724	811406	809811	428820	558810	767995	647720	140739	Q8BRT1	Clasp2		140739
76824.9	Q8CFC7	Clasrp	CLK4-associating serine/arginine rich protein	CLASR_MOUSE	4	3	4	4	5	6	4	3	5	5	5	5	5	2	5	4	4	3	5	5	21273.1	12968.6	53240.4	32685.9	42434.5	40880.6	42836.3	17984.2	49766	65421.4	65868.2	48002.9	43936.6	15266.5	58992.2	50170.7	39570.8	19556.9	54410.2	56050.7	76824.9	Q8CFC7	Clasrp		76824.9
60621.2	Q99LI2	Clcc1	Chloride channel CLIC-like protein 1	CLCC1_MOUSE	13	10	14	9	13	15	13	11	14	14	14	12	15	12	14	14	9	11	14	11	162966	103900	387485	148960	235449	257819	255586	185308	267682	322944	374749	157016	247180	155005	310786	327522	171956	179157	278908	206933	60621.2	Q99LI2	Clcc1		60621.2
96627.49;90233.78	P51791-3;P51791-5	Clcn3	Isoform 3 of H(+)/Cl(-) exchange transporter 3;Isoform 5 of H(+)/Cl(-) exchange transporter 3	CLCN3_MOUSE	8	4	9	10	7	7	6	6	6	6	6	7	7	6	7	7	3	5	5	6	72275.7	31033.3	175622	152365	118902	84199.7	123215	95020	94367.5	85439.8	123856	104188	81480.8	77085.4	110556	131497	34825.2	47348.6	72886.1	56991.8	96627.5	P51791-3	Clcn3		96627.5
83733.4	Q61418	Clcn4	H(+)/Cl(-) exchange transporter 4	CLCN4_MOUSE	0	0	0	1	0	0	0	0	0	1	0	0	0	0	1	0	0	2	1	1	NaN	NaN	NaN	6342.09	NaN	NaN	NaN	NaN	NaN	4920.41	NaN	NaN	NaN	NaN	7271.01	NaN	NaN	10003.1	4988.76	7423.29	83733.4	Q61418	Clcn4		83733.4
90706.12;90706.12-2	Q9WVD4;Q9WVD4-2	Clcn5	H(+)/Cl(-) exchange transporter 5;Isoform 2 of H(+)/Cl(-) exchange transporter 5	CLCN5_MOUSE	0	0	2	1	0	1	0	1	0	0	0	1	0	0	0	1	0	0	0	0	NaN	NaN	27275.4	5180.71	NaN	8011.8	NaN	6741.76	NaN	NaN	NaN	11063.6	NaN	NaN	NaN	15681.1	NaN	NaN	NaN	NaN	90706.1	Q9WVD4	Clcn5		90706.1
96980.2	O35454	Clcn6	H(+)/Cl(-) exchange transporter 6	CLCN6_MOUSE	4	3	6	5	5	5	6	6	6	5	7	0	4	0	2	3	0	0	0	0	18731.2	11760.8	46266.1	43495.3	35226.6	29865.3	41626.4	28754.3	40430.7	28334.4	54814.9	NaN	16222.2	NaN	5952.15	20310.8	NaN	NaN	NaN	NaN	96980.2	O35454	Clcn6		96980.2
88713	O70496	Clcn7	H(+)/Cl(-) exchange transporter 7	CLCN7_MOUSE	6	6	7	7	5	7	5	6	6	7	7	8	7	5	9	7	3	8	9	10	52741.2	28176.5	129937	90348.4	62661.4	73796.8	63848.9	65459.9	70216.1	73420	108708	93967.9	66683.3	42200.9	129695	116589	43678.1	111499	139376	136917	88713	O70496	Clcn7		88713
28572.1	Q9CQX5	Cldnd1	Claudin domain-containing protein 1	CLDN1_MOUSE	5	5	5	5	5	5	5	5	5	5	5	5	5	5	5	5	1	3	2	1	178127	143982	388119	243833	184707	186164	265593	177864	218831	213944	256089	122859	163671	130674	249687	220042	6035.97	25256	21388	12059.3	28572.1	Q9CQX5	Cldnd1		28572.1
116232.18;116232.18-2;116232.18-3;116232.18-4;116232.18-5	Q80U30;Q80U30-2;Q80U30-3;Q80U30-4;Q80U30-5	Clec16a	Protein CLEC16A;Isoform 2 of Protein CLEC16A;Isoform 3 of Protein CLEC16A;Isoform 4 of Protein CLEC16A;Isoform 5 of Protein CLEC16A	CL16A_MOUSE	0	0	0	0	0	0	0	1	0	1	1	1	1	1	0	1	0	0	0	0	NaN	NaN	NaN	NaN	NaN	NaN	NaN	3137.99	NaN	2022.570068359375	6389.56	3010.197509765625	2568.774169921875	1576.821533203125	NaN	2389	NaN	NaN	NaN	NaN	116232	Q80U30	Clec16a		116232
23647	Q91V08	Clec2d	C-type lectin domain family 2 member D	CLC2D_MOUSE	5	5	7	7	6	6	6	5	6	7	6	6	6	5	5	5	5	4	6	5	130572	126576	371542	429085	240092	195966	235215	162285	240244	311037	295153	291934	242130	160548	264774	296174	175955	178534	244238	184101	23647	Q91V08	Clec2d		23647
24671.38;24671.38-2;24671.38-3;24671.38-4	Q9WVF9;Q9WVF9-2;Q9WVF9-3;Q9WVF9-4	Clec2i	C-type lectin domain family 2 member I;Isoform 2 of C-type lectin domain family 2 member I;Isoform 3 of C-type lectin domain family 2 member I;Isoform 4 of C-type lectin domain family 2 member I	CLC2I_MOUSE	1	0	3	3	2	1	0	0	0	0	0	0	0	0	0	0	0	0	0	0	6674.98	NaN	55594.1	45652.8	11975.1	2723.032958984375	NaN	NaN	NaN	NaN	NaN	NaN	NaN	NaN	NaN	NaN	NaN	NaN	NaN	NaN	24671.4	Q9WVF9	Clec2i		24671.4
27012.8	Q9Z1Q5	Clic1	Chloride intracellular channel protein 1	CLIC1_MOUSE	14	13	15	14	15	15	14	15	15	15	15	15	15	15	15	15	14	15	15	15	2.43777e+06	1.63775e+06	5590279	3650106	5232492	4483997	6068073	4663649	4.71545e+06	5.31633e+06	5.4394e+06	4.19887e+06	5573262	3.84393e+06	6.75282e+06	6.61419e+06	5.74064e+06	5.53385e+06	7.91725e+06	5.89663e+06	27012.8	Q9Z1Q5	Clic1		27012.8
28729	Q9QYB1	Clic4	Chloride intracellular channel protein 4	CLIC4_MOUSE	13	15	19	18	15	17	17	17	16	15	17	16	17	17	15	16	13	13	15	13	698436	517748	1.57208e+06	1.08688e+06	1.43997e+06	1.22916e+06	1.68321e+06	1.27501e+06	1.34703e+06	1.49509e+06	1.73451e+06	1.3044e+06	1.3274e+06	858702	1.72868e+06	1.63798e+06	474298	413541	698219	532726	28729	Q9QYB1	Clic4		28729
62885.91;28286.97	Q8BHB9;Q8BXK9	Clic6;Clic5	Chloride intracellular channel protein 6;Chloride intracellular channel protein 5	CLIC6_MOUSE;CLIC5_MOUSE	0	0	0	0	1	1	0	1	1	0	0	0	0	0	1	1	0	0	1	0	NaN	NaN	NaN	NaN	6570.55	2489.73	NaN	5186.29	2531.79	NaN	NaN	NaN	NaN	NaN	5260.63	2706.79	NaN	NaN	7828.32	NaN	62885.9	Q8BHB9	Clic6		62885.9
68512.8	Q99KN9	Clint1	Clathrin interactor 1	EPN4_MOUSE	18	16	18	19	18	17	18	19	18	18	19	15	20	17	19	17	16	18	18	18	857280	710530	1.70244e+06	1.34962e+06	1.50625e+06	1.38066e+06	1.53505e+06	1.26602e+06	1.57711e+06	1.63688e+06	1.88224e+06	1.21534e+06	1.39189e+06	1161110	1.773e+06	1.71977e+06	1.50257e+06	1.62622e+06	2.04582e+06	1799450	68512.8	Q99KN9	Clint1		68512.8
155814	Q922J3	Clip1	CAP-Gly domain-containing linker protein 1	CLIP1_MOUSE	39	32	46	35	47	39	50	50	38	48	45	37	49	42	46	45	24	33	35	37	428434	255580	854920	412615	831191	546898	911296	712752	741610	991649	1.14327e+06	564207	821274	497614	1116066	1.03397e+06	377802	337415	637093	489671	155814	Q922J3	Clip1		155814
115910.23;115910.23-2	Q9Z0H8;Q9Z0H8-2	Clip2	CAP-Gly domain-containing linker protein 2;Isoform 2 of CAP-Gly domain-containing linker protein 2	CLIP2_MOUSE	0	0	3	0	0	0	0	0	0	0	0	2	0	0	0	0	4	4	3	1	NaN	NaN	20714.9	NaN	NaN	NaN	NaN	NaN	NaN	NaN	NaN	12595	NaN	NaN	NaN	NaN	25017.3	12090.8	18213.6	2700.68	115910	Q9Z0H8	Clip2		115910
57093.4	P22518	Clk1	Dual specificity protein kinase CLK1	CLK1_MOUSE	3	0	4	2	0	0	2	0	3	3	0	4	3	0	4	3	0	0	3	0	14452.2	NaN	38216	44236.3	NaN	NaN	23088.4	NaN	34104.4	34146.5	NaN	35898.2	30793.8	NaN	33125.4	38637.5	NaN	NaN	23581.6	NaN	57093.4	P22518	Clk1		57093.4
59987	O35491	Clk2	Dual specificity protein kinase CLK2	CLK2_MOUSE	3	4	5	4	5	4	5	3	4	5	4	4	5	3	5	5	0	4	3	0	28608.4	49055.5	71045.2	66071.8	58157.8	55897.1	90290.3	28704.5	52435.9	92238.5	100939	52867.4	57090.9	29160.3	83937.4	92458.3	NaN	31784.2	33592.8	NaN	59987	O35491	Clk2		59987
73797.7	O35492	Clk3	Dual specificity protein kinase CLK3	CLK3_MOUSE	6	5	8	8	9	6	6	4	7	6	7	7	8	6	5	7	4	6	5	6	47080.8	32865.2	203672	94188.2	122059	61475.7	94826.9	44503	105715	121134	124990	101956	132443	53862	118553	124384	71542.6	89089.3	108977	101946	73797.7	O35492	Clk3		73797.7
57344.8	O35493	Clk4	Dual specificity protein kinase CLK4	CLK4_MOUSE	4	3	4	4	3	5	3	3	4	5	6	4	3	3	5	5	1	3	3	4	35047.6	14754	69275.9	72787.8	33013	31655.3	33940.7	19600.8	58775.8	65184.6	90274.1	54586.9	43250.6	30414.4	68189.5	61670.8	23329.5	42574.5	40029.4	53412.3	57344.8	O35493	Clk4		57344.8
47657	Q61124	Cln3	Battenin	CLN3_MOUSE	0	1	1	2	0	2	1	0	0	0	0	2	2	0	0	0	0	0	0	0	NaN	2439.41	9745.54	17360.2	NaN	11983.6	4711.18	NaN	NaN	NaN	NaN	17471.6	7849.79	NaN	NaN	NaN	NaN	NaN	NaN	NaN	47657	Q61124	Cln3		47657
39329.2	Q3UMW8	Cln5	Ceroid-lipofuscinosis neuronal protein 5 homolog	CLN5_MOUSE	6	3	6	5	5	5	5	4	4	5	4	6	5	5	4	4	2	4	1	0	88269	13594.5	91827.1	41663.7	56902.1	83283.2	54399.8	27602.4	34107	112308	45491.8	86725.7	107488	101629	49437.3	46452.8	80357.4	22733	11310.9	NaN	39329.2	Q3UMW8	Cln5		39329.2
26021.1	Q61189	Clns1a	Methylosome subunit pICln	ICLN_MOUSE	3	1	3	3	3	3	4	4	4	4	3	4	4	4	4	4	2	4	4	3	12108.7	2420.43	77052.7	26232.3	37081.4	38519.3	133608	40648.6	63152.7	170630	56004.8	48955	83352.2	57726.2	116550	219932	21981.7	39895.3	30036.1	35964	26021.1	Q61189	Clns1a		26021.1
96392.9;96392.9-2	O08785;O08785-2	Clock	Circadian locomoter output cycles protein kaput;Isoform Short of Circadian locomoter output cycles protein kaput	CLOCK_MOUSE	0	0	0	0	0	1	1	0	1	1	0	0	0	0	1	0	0	0	0	1	NaN	NaN	NaN	NaN	NaN	5027.42	4843.06	NaN	6646.84	5279.92	NaN	NaN	NaN	NaN	4753.39	NaN	NaN	NaN	NaN	1833.280029296875	96392.9	O08785	Clock		96392.9
47737.6	Q99LI9	Clp1	Polyribonucleotide 5'-hydroxyl-kinase Clp1	CLP1_MOUSE	9	8	11	12	9	9	11	9	10	11	11	11	11	10	10	10	9	11	9	10	224563	152882	551385	465569	345727	281190	389352	297340	399841	483223	506162	349396	375920	277496	487568	471428	355245	386860	409702	375009	47737.6	Q99LI9	Clp1		47737.6
76003.7	Q60649	Clpb	Mitochondrial disaggregase	CLPB_MOUSE	15	12	19	11	15	14	16	16	14	15	16	8	18	13	14	15	4	11	12	12	235305	166681	493856	142898	332973	277420	357251	307305	377207	456188	523180	106634	379887	152386	398244	428203	51070.4	109638	173073	126302	76003.7	Q60649	Clpb		76003.7
29800.5	O88696	Clpp	ATP-dependent Clp protease proteolytic subunit, mitochondrial	CLPP_MOUSE	7	8	8	9	8	8	7	8	8	8	7	9	8	7	8	8	7	7	7	8	191973	182350	584742	457317	308908	246256	284465	314310	419355	471327	479094	398281	490436	294520	551979	530812	271114	309905	355124	255519	29800.5	O88696	Clpp		29800.5
75290.7	Q8VBZ3	Clptm1	Putative lipid scramblase CLPTM1	CLPT1_MOUSE	14	15	17	14	15	15	16	13	16	16	15	14	15	12	14	13	7	10	11	11	321638	259451	784834	481901	524749	418502	535698	387672	575472	639353	726607	401775	458353	329904	661733	633975	167654	214756	278453	229074	75290.7	Q8VBZ3	Clptm1		75290.7
62183.3	Q8BXA5	Clptm1l	Lipid scramblase CLPTM1L	CLP1L_MOUSE	8	7	10	10	8	8	8	7	9	9	8	10	10	7	8	6	4	9	8	7	174785	126957	323829	371600	207761	193808	268585	168657	223466	259685	288146	289584	187176	163047	244466	204481	86058.6	173432	194774	172908	62183.3	Q8BXA5	Clptm1l		62183.3
69228.7	Q9JHS4	Clpx	ATP-dependent Clp protease ATP-binding subunit clpX-like, mitochondrial	CLPX_MOUSE	16	18	20	20	18	18	19	15	18	19	20	18	19	15	16	17	14	16	17	17	440623	380869	989322	767748	590744	554186	723532	470706	692907	830366	930539	491017	585021	368776	776320	818366	259551	346143	426222	346181	69228.7	Q9JHS4	Clpx		69228.7
146715	Q80YR7	Clspn	Claspin	CLSPN_MOUSE	0	2	5	0	0	5	6	6	11	11	9	0	13	7	12	12	0	0	0	0	NaN	9441.38	87092.1	NaN	NaN	77571.4	97925.7	64536.6	166932	209746	179995	NaN	190122	84575.7	229274	244829	NaN	NaN	NaN	NaN	146715	Q80YR7	Clspn		146715
25604.1	O08585	Clta	Clathrin light chain A	CLCA_MOUSE	7	6	7	8	7	7	7	7	7	7	7	7	8	7	8	7	7	7	7	7	1.13242e+06	785111	1.91333e+06	1.32646e+06	1.93511e+06	1680897	2.19433e+06	1.62208e+06	2.01466e+06	2244868	2.37646e+06	1.71543e+06	2058854	1.55945e+06	2.48684e+06	2400309	2.04369e+06	1.69091e+06	2194413	1.82674e+06	25604.1	O08585	Clta		25604.1
23174.3	Q6IRU5-2	Cltb	Isoform 2 of Clathrin light chain B	CLCB_MOUSE	8	6	9	8	7	9	8	7	9	9	9	7	9	7	9	6	8	7	7	7	176678	113929	402818	259508	267290	379237	402112	276295	419325	429230	537746	365937	380418	317640	545589	326503	299299	232559	367073	248948	23174.3	Q6IRU5-2	Cltb		23174.3
191557	Q68FD5	Cltc	Clathrin heavy chain 1	CLH1_MOUSE	82	84	91	89	85	88	88	88	83	83	85	87	89	83	87	81	77	83	84	83	12136894	8699022	25646628	17443668	24239532	21701706	28004178	20528366	24038374	27952242	31171148	21046058	25770680	18115240	32190414	30953624	16488778	20065884	26534752	20752898	191557	Q68FD5	Cltc		191557
51655.6	Q06890	Clu	Clusterin	CLUS_MOUSE	0	0	0	0	0	0	0	0	0	0	0	0	0	0	0	0	0	1	1	0	NaN	NaN	NaN	NaN	NaN	NaN	NaN	NaN	NaN	NaN	NaN	NaN	NaN	NaN	NaN	NaN	NaN	4964.5	7855.91	NaN	51655.6	Q06890	Clu		51655.6
148068	Q5SW19	Cluh	Clustered mitochondria protein homolog	CLU_MOUSE	45	44	56	44	51	48	51	45	53	52	52	50	55	50	54	52	14	26	35	22	1.01244e+06	763838	2357405	1.12524e+06	1.73526e+06	1.60144e+06	2170190	1.49086e+06	2642645	2798808	3.37765e+06	1.50073e+06	2.25448e+06	1.58898e+06	3060207	2.7967e+06	139345	230522	427956	201307	148068	Q5SW19	Cluh		148068
37548.5	Q8R4N0	Clybl	Citramalyl-CoA lyase, mitochondrial	CLYBL_MOUSE	9	7	13	12	10	12	10	10	12	10	11	11	12	11	11	12	10	12	12	12	111744	71513.6	252636	197496	185802	192215	181552	131542	173210	145468	201491	151389	164512	115495	199180	220622	214093	265081	323861	259060	37548.5	Q8R4N0	Clybl		37548.5
66935.6	Q61419	Cmah	Cytidine monophosphate-N-acetylneuraminic acid hydroxylase	CMAH_MOUSE	7	7	11	11	13	12	12	11	12	12	11	13	11	9	12	9	14	14	15	15	57366.8	55597.5	273885	166085	210749	176985	237591	119252	162919	161049	206542	234511	143357	95792.6	252554	138445	440683	346866	483721	421045	66935.6	Q61419	Cmah		66935.6
48058	Q99KK2	Cmas	N-acylneuraminate cytidylyltransferase	NEUA_MOUSE	15	13	17	18	15	14	15	14	16	15	14	17	16	15	15	14	13	16	17	16	428138	303094	1.03295e+06	894751	708227	618172	737226	469135	712216	900611	817984	738009	606036	490894	824260	706353	849732	873705	1.19889e+06	912368	48058	Q99KK2	Cmas		48058
12552.6	Q9CPZ8	Cmc1	COX assembly mitochondrial protein homolog	COXM1_MOUSE	3	2	2	3	2	3	3	2	2	3	2	3	2	2	2	3	0	0	2	2	24057.1	4811.77	44840.1	55713.7	28426.2	31106	39605.4	11612.3	33519.8	42936.4	46086.9	41112.1	48117.6	27373.9	46792.1	56602.1	NaN	NaN	25764.3	24814.1	12552.6	Q9CPZ8	Cmc1		12552.6
9418.69	Q8K199	Cmc2	COX assembly mitochondrial protein 2 homolog	COXM2_MOUSE	2	2	2	2	1	2	1	2	2	2	2	2	2	2	2	2	0	2	2	2	23291.9	20496.6	44520.8	33628.8	17028	22734.8	12009	25020.1	51242.4	49922.6	51402.3	26773.8	60938.3	33138.5	47170.9	48223	NaN	37614.2	44886.8	41549.4	9418.69	Q8K199	Cmc2		9418.69
7743.01	Q61908	Cmc4	Cx9C motif-containing protein 4	CMC4_MOUSE	3	0	3	3	0	0	1	0	2	1	3	2	3	2	3	0	3	4	2	1	20773.1	NaN	31981.5	39259.4	NaN	NaN	6482.03	NaN	15671.8	13404.3	28223.8	11729.8	15380	13864	33581.1	NaN	27014.6	37045.2	22561.2	14867.1	7743.01	Q61908	Cmc4		7743.01
86258.54;86258.54-2	Q9D486;Q9D486-2	Cmip	C-Maf-inducing protein;Isoform 2 of C-Maf-inducing protein	CMIP_MOUSE	0	0	5	5	5	5	5	5	5	4	5	6	4	4	6	6	0	5	5	3	NaN	NaN	53846	40301	46247.1	43282.2	38003.3	33690.1	52823.4	37946	57174.2	61367.1	36662.6	27476.9	76537.3	60234.9	NaN	32345.3	53098.8	18723.7	86258.5	Q9D486	Cmip		86258.5
22165.3	Q9DBP5	Cmpk1	UMP-CMP kinase	KCY_MOUSE	11	9	11	10	11	12	12	10	11	10	12	12	12	12	11	10	11	11	11	12	774999	442593	1.62541e+06	961916	1.55507e+06	1.3262e+06	1.82828e+06	1.00731e+06	1620338	1.66262e+06	1.98137e+06	1.34612e+06	1.47254e+06	1.04984e+06	2192992	1.48351e+06	1.46357e+06	1.24595e+06	1955902	1.84925e+06	22165.3	Q9DBP5	Cmpk1		22165.3
50036.3	Q3U5Q7	Cmpk2	UMP-CMP kinase 2, mitochondrial	CMPK2_MOUSE	17	16	17	17	19	19	19	17	18	19	19	19	19	20	19	19	18	21	20	20	318670	236424	554669	444167	617448	717739	869095	425984	716274	737344	695713	797336	717464	665634	785004	865880	1062268	1.16972e+06	1.23662e+06	1.02311e+06	50036.3	Q3U5Q7	Cmpk2		50036.3
31593.6	Q9CZT6	Cmss1	Protein CMSS1	CMS1_MOUSE	6	6	8	7	6	6	6	6	6	7	7	6	6	6	7	6	4	5	6	6	149481	129342	331037	191489	212883	217053	217733	157616	281442	289343	363307	172212	206375	147052	297127	269883	56848.6	75208.2	147881	112374	31593.6	Q9CZT6	Cmss1		31593.6
19824.2	Q9CZ69	Cmtm6	CKLF-like MARVEL transmembrane domain-containing protein 6	CKLF6_MOUSE	2	0	4	3	2	2	2	2	2	2	2	2	2	2	2	2	2	2	3	2	40941.5	NaN	101458	81946.3	64564.8	53513.7	71703.8	49733.8	67983.5	78883.7	83310.1	58203.4	56774.1	38896.8	87497.1	68584.9	51838.5	47180	56210.4	47074.2	19824.2	Q9CZ69	Cmtm6		19824.2
18105.45;18105.45-2	Q9ESD6;Q9ESD6-2	Cmtm7	CKLF-like MARVEL transmembrane domain-containing protein 7;Isoform 2 of CKLF-like MARVEL transmembrane domain-containing protein 7	CKLF7_MOUSE	0	4	4	4	4	4	4	3	3	3	3	4	4	3	3	3	3	3	4	3	NaN	102378	189473	188240	173367	177002	159404	96334.7	55925	74695	92495	145631	113546	76034.4	100002	90335.5	68404.8	92047.6	139690	67851.3	18105.5	Q9ESD6	Cmtm7		18105.5
95676.3	Q9DBC3	Cmtr1	Cap-specific mRNA (nucleoside-2'-O-)-methyltransferase 1	CMTR1_MOUSE	28	29	36	35	34	34	34	33	31	33	36	33	37	34	32	34	27	34	35	32	635858	471311	1.55495e+06	1165432	1.20077e+06	1.13182e+06	1.30393e+06	934075	1.18977e+06	1.28484e+06	1.56836e+06	1.23153e+06	1.26239e+06	904967	1.53532e+06	1.43772e+06	1.4451e+06	1.3608e+06	1.84786e+06	1.42317e+06	95676.3	Q9DBC3	Cmtr1		95676.3
87142.5	Q8BWQ4	Cmtr2	Cap-specific mRNA (nucleoside-2'-O-)-methyltransferase 2	CMTR2_MOUSE	8	4	10	10	7	8	7	6	9	10	7	12	10	4	8	6	2	2	0	2	76708.4	30306.8	171874	108347	93725.4	88520.7	82880.5	55304.2	109604	121783	121205	167935	112929	18400.2	166083	80897.5	43756.4	48334.5	NaN	39679.7	87142.5	Q8BWQ4	Cmtr2		87142.5
18741.96;19462.7	P53996-2;P53996-3	Cnbp	Isoform 2 of CCHC-type zinc finger nucleic acid binding protein;Isoform 3 of CCHC-type zinc finger nucleic acid binding protein	CNBP_MOUSE	1	1	1	1	1	1	1	1	1	1	1	1	1	1	1	1	1	1	1	1	60551.2	93364.9	355002	48487.2	271575	165051	280409	216051	383102	395982	407534	54017.6	245979	151570	370244	456634	154606	124547	186389	142633	18742	P53996-2	Cnbp		18742
19591.8	P53996	Cnbp	CCHC-type zinc finger nucleic acid binding protein	CNBP_MOUSE	7	8	8	7	8	8	9	8	9	9	9	7	8	8	9	8	8	9	9	9	561749	661956	1.76341e+06	276397	1.54161e+06	1.06518e+06	1.78409e+06	1.53911e+06	2126335	2.11833e+06	2.39749e+06	406074	1.558e+06	850506	2.27734e+06	2.48751e+06	822348	747632	1.21961e+06	876525	19591.8	P53996	Cnbp		19591.8
52767.3	Q9D1A2	Cndp2	Cytosolic non-specific dipeptidase	CNDP2_MOUSE	22	20	22	21	23	22	23	22	21	21	22	21	21	20	22	22	20	21	21	22	846485	563430	1.61815e+06	838318	1.60544e+06	1.36728e+06	1891014	1.3651e+06	1715858	1.7591e+06	1.98824e+06	1.23582e+06	1.58329e+06	1.07859e+06	2269887	2.15511e+06	1.62919e+06	1.47166e+06	2.34121e+06	1.69039e+06	52767.3	Q9D1A2	Cndp2		52767.3
14266.7	Q3UJ81	Cnep1r1	Nuclear envelope phosphatase-regulatory subunit 1	NEPR1_MOUSE	1	0	3	2	2	2	2	2	0	2	2	2	2	2	2	2	1	0	2	1	8838.04	NaN	36908.9	25674.3	22037	19077.8	33041	18141.8	NaN	22021.1	22033.4	19519.2	27098.1	17417.1	32074.8	32787.3	3592.08	NaN	15192	11068.5	14266.7	Q3UJ81	Cnep1r1		14266.7
16089.4	Q9CX13	Cnih4	Protein cornichon homolog 4	CNIH4_MOUSE	1	1	1	1	1	1	1	1	1	1	1	1	1	1	1	1	0	1	1	1	65359.6	60335.9	160854	96329.1	85163.2	111697	113574	95384.6	98190	107237	134525	71330.8	100248	59573.9	105344	115540	NaN	72856.1	112800	87689.5	16089.4	Q9CX13	Cnih4		16089.4
33155.5	Q08093	Cnn2	Calponin-2	CNN2_MOUSE	11	11	12	13	12	12	13	12	12	13	12	12	13	11	13	12	12	12	12	12	414290	301908	1.12561e+06	906029	943140	942075	1.11786e+06	833748	1.0066e+06	1.06352e+06	1.27461e+06	1.12627e+06	1.06643e+06	689879	1.38222e+06	1337131	1.15533e+06	1.38421e+06	2116935	1.52283e+06	33155.5	Q08093	Cnn2		33155.5
36428.7	Q9DAW9	Cnn3	Calponin-3	CNN3_MOUSE	12	11	14	14	12	13	12	12	12	12	12	13	13	12	12	12	10	11	12	12	692270	514658	1.60729e+06	1.5765e+06	1.30956e+06	1.32678e+06	1.53088e+06	1.02097e+06	1.26268e+06	1.3852e+06	1531410	1.59451e+06	1.24903e+06	1.00424e+06	1.47556e+06	1.40829e+06	1.69876e+06	1.72048e+06	2.28928e+06	1.76957e+06	36428.7	Q9DAW9	Cnn3		36428.7
76279.25;76279.25-2	Q32NY4;Q32NY4-2	Cnnm3	Metal transporter CNNM3;Isoform 2 of Metal transporter CNNM3	CNNM3_MOUSE	6	4	9	4	7	6	6	7	7	5	6	0	8	4	0	6	0	0	2	0	26052.8	17106.1	123117	18395.9	52248.6	53976.3	50863.3	64491.1	79496.4	40584.7	58155.9	NaN	88600	22776.1	NaN	57412.6	NaN	NaN	26706.2	NaN	76279.2	Q32NY4	Cnnm3		76279.2
86625.9	Q69ZF7	Cnnm4	Metal transporter CNNM4	CNNM4_MOUSE	0	0	5	3	0	3	3	1	6	4	2	0	5	0	3	2	0	1	1	0	NaN	NaN	41758.3	18975.4	NaN	15260	19693.3	7053.06	38455.4	41402.6	10119.1	NaN	31826.6	NaN	24886.8	13330.2	NaN	7655.3	9260.73	NaN	86625.9	Q69ZF7	Cnnm4		86625.9
266807.71;266807.71-4	Q6ZQ08;Q6ZQ08-4	Cnot1	CCR4-NOT transcription complex subunit 1;Isoform 4 of CCR4-NOT transcription complex subunit 1	CNOT1_MOUSE	71	68	84	77	77	75	79	74	76	80	75	79	85	70	75	70	58	74	74	72	1697628	1.2572e+06	3.79708e+06	2.83196e+06	3.02308e+06	2.58652e+06	3.35001e+06	2.42604e+06	3.17254e+06	3.61342e+06	4.06184e+06	2825852	3.0848e+06	2.11922e+06	3755359	3.59764e+06	1.76252e+06	2.32088e+06	2.95618e+06	2.3178e+06	266808	Q6ZQ08	Cnot1		266808
81818.14;81818.14-2	Q8BH15;Q8BH15-2	Cnot10	CCR4-NOT transcription complex subunit 10;Isoform 2 of CCR4-NOT transcription complex subunit 10	CNO10_MOUSE	13	12	15	16	16	15	16	14	14	16	16	15	16	16	16	18	11	13	14	14	183154	103801	439382	398654	342829	323988	365775	376298	420004	451042	509346	355378	408179	351319	487040	542017	227509	259690	352845	275092	81818.1	Q8BH15	Cnot10		81818.1
54959.2	Q9CWN7	Cnot11	CCR4-NOT transcription complex subunit 11	CNO11_MOUSE	7	0	8	8	9	9	9	8	9	9	9	10	10	7	10	9	4	7	9	7	62137.2	NaN	156803	145533	126509	137954	158019	108581	133891	183482	191547	131171	162915	112293	210709	159019	48961.9	79405.8	110894	69415	54959.2	Q9CWN7	Cnot11		54959.2
59710.67;59710.67-2	Q8C5L3;Q8C5L3-2	Cnot2	CCR4-NOT transcription complex subunit 2;Isoform 2 of CCR4-NOT transcription complex subunit 2	CNOT2_MOUSE	13	13	14	12	15	13	14	14	14	15	14	14	14	13	14	13	12	14	14	14	278659	198552	580754	306309	501238	418305	495100	398504	529260	581943	639027	425374	495952	358496	561703	611966	370136	389147	542479	418604	59710.7	Q8C5L3	Cnot2		59710.7
81945.8	Q8K0V4	Cnot3	CCR4-NOT transcription complex subunit 3	CNOT3_MOUSE	11	11	12	11	12	12	13	13	11	12	12	13	12	11	11	12	11	12	11	11	336380	254873	687398	429466	585131	519147	646381	493432	647973	643310	803059	503800	532610	393691	731128	751141	433082	471032	652625	479444	81945.8	Q8K0V4	Cnot3		81945.8
63474.04;63474.04-2;63474.04-3	Q8BT14;Q8BT14-2;Q8BT14-3	Cnot4	CCR4-NOT transcription complex subunit 4;Isoform 2 of CCR4-NOT transcription complex subunit 4;Isoform 3 of CCR4-NOT transcription complex subunit 4	CNOT4_MOUSE	5	6	8	6	7	6	8	8	10	8	9	9	7	9	10	7	5	4	9	8	46535.2	46233.7	122970	69444.6	97065.1	85561.2	118401	80428.2	131681	138032	164606	86900.9	90619.9	88182.1	159117	178447	43612.8	39056.9	90896.1	75997.7	63474	Q8BT14	Cnot4		63474
63303.69;63303.69-2	Q8K3P5;Q8K3P5-2	Cnot6	CCR4-NOT transcription complex subunit 6;Isoform 2 of CCR4-NOT transcription complex subunit 6	CNOT6_MOUSE	1	0	1	0	0	0	0	2	0	0	0	0	2	0	0	0	0	2	0	0	21196.5	NaN	18497.5	NaN	NaN	NaN	NaN	38594.7	NaN	NaN	NaN	NaN	35001.1	NaN	NaN	NaN	NaN	17184.7	NaN	NaN	63303.7	Q8K3P5	Cnot6		63303.7
63023.33;63023.33-2	Q8VEG6;Q8VEG6-2	Cnot6l	CCR4-NOT transcription complex subunit 6-like;Isoform 2 of CCR4-NOT transcription complex subunit 6-like	CNO6L_MOUSE	7	0	11	8	10	6	10	9	11	10	10	10	11	5	11	9	4	10	10	10	86936.4	NaN	241829	132618	186493	136787	202293	142750	202494	205138	245043	153731	220175	78549.2	250097	228537	54576.2	136746	172641	142206	63023.3	Q8VEG6	Cnot6l		63023.3
32718.1	Q60809	Cnot7	CCR4-NOT transcription complex subunit 7	CNOT7_MOUSE	6	4	8	7	6	7	6	6	7	7	8	8	7	6	8	7	5	7	7	6	55568.2	33187.7	112293	74884.9	102720	100980	95445.6	86155.4	132918	172916	173999	111520	145553	65627.9	178528	178339	47216.4	76304	87548.1	97279.3	32718.1	Q60809	Cnot7		32718.1
33574.3	Q9D8X5	Cnot8	CCR4-NOT transcription complex subunit 8	CNOT8_MOUSE	5	4	5	5	4	5	5	5	6	6	5	6	6	5	6	5	4	6	6	4	47783.8	24021.3	122225	91857	76403.7	77641.3	132887	77632.3	134514	148642	157767	109769	105587	51508.7	195444	187797	66957.6	96191.7	91682	75668.6	33574.3	Q9D8X5	Cnot8		33574.3
33601.2	Q9JKY0	Cnot9	CCR4-NOT transcription complex subunit 9	CNOT9_MOUSE	11	10	12	12	10	11	11	11	11	10	10	11	12	11	11	11	11	11	11	11	248895	168234	500278	371103	339186	364387	469776	379769	444958	436176	512851	366299	435978	286082	579243	564431	254474	299397	396329	324346	33601.2	Q9JKY0	Cnot9		33601.2
47123.32;47123.32-2	P16330;P16330-2	Cnp	2',3'-cyclic-nucleotide 3'-phosphodiesterase;Isoform CNPI of 2',3'-cyclic-nucleotide 3'-phosphodiesterase	CN37_MOUSE	19	21	25	24	21	23	23	23	23	24	25	24	23	23	24	25	21	24	25	23	1.5001e+06	1.38272e+06	3.59278e+06	3.1335e+06	3455187	3.20783e+06	3.90541e+06	2.79633e+06	3.32126e+06	3.90576e+06	4.28881e+06	3.09225e+06	3.44285e+06	2640192	4.68693e+06	4.51657e+06	3.82854e+06	4.6698e+06	5.44139e+06	4629678	47123.3	P16330	Cnp		47123.3
20767.3	Q9QXT0	Cnpy2	Protein canopy homolog 2	CNPY2_MOUSE	7	7	9	8	8	7	7	8	8	8	7	7	8	7	7	7	7	8	7	7	162077	98197.1	432891	278628	346395	245986	404189	276244	374737	455438	454545	217592	370196	250498	511235	511678	318057	324016	438705	326906	20767.3	Q9QXT0	Cnpy2		20767.3
30537.8	Q9DAU1	Cnpy3	Protein canopy homolog 3	CNPY3_MOUSE	8	8	10	10	9	10	10	10	11	11	10	10	10	9	9	10	8	10	9	8	280564	219082	577223	597126	465405	477485	548332	394264	673012	689001	715737	528471	526052	398426	673030	640113	342195	381150	448501	311549	30537.8	Q9DAU1	Cnpy3		30537.8
28093.7	Q8BQ47	Cnpy4	Protein canopy homolog 4	CNPY4_MOUSE	7	6	7	7	7	7	6	6	7	7	8	7	6	7	6	7	6	5	7	8	123047	108371	4.01236e+06	314727	235989	218334	241876	2938465	218710	4.62588e+06	308327	276149	195875	2632432	261798	237790	244972	205755	2.56464e+06	257657	28093.7	Q8BQ47	Cnpy4		28093.7
38213.3	P47936	Cnr2	Cannabinoid receptor 2	CNR2_MOUSE	1	2	2	2	2	2	2	2	0	2	1	0	2	2	1	2	1	1	1	1	13075	17700.9	50986.4	11845.4	41943.8	29810.3	39076.5	33369.1	NaN	21374.3	22979	NaN	27525.6	25011.3	20914.7	39289.7	24535.9	19007.4	23449.6	16241.2	38213.3	P47936	Cnr2		38213.3
18612.4	Q5M8N0	Cnrip1	CB1 cannabinoid receptor-interacting protein 1	CNRP1_MOUSE	5	5	5	5	6	6	5	6	6	7	4	7	6	4	7	6	4	5	5	4	239120	135596	97610.9	144578	357338	272829	286469	268186	396972	332735	343685	94449.4	246546	32707.9	432678	324884	459641	65707.8	550785	479948	18612.4	Q5M8N0	Cnrip1		18612.4
76865.7	Q8CBC4	Cnst	Consortin	CNST_MOUSE	0	3	8	6	4	6	5	1	5	6	6	4	7	5	5	6	2	7	6	5	NaN	15436.3	69263	46522.5	36781.2	49603	34923.2	5347.59	22852.3	61034.1	68282.7	34537.2	45011.9	33964.2	48135.5	43850.3	27358	53101.2	71627	44901.6	76865.7	Q8CBC4	Cnst		76865.7
268880	A2AL36	Cntrl	Centriolin	CNTRL_MOUSE	30	25	38	43	39	39	35	33	44	43	45	44	43	33	47	38	32	52	54	46	202310	158835	537495	561085	445045	447649	465338	326026	517185	511812	681903	502865	456342	308366	680288	531056	477735	645961	869091	631610	268880	A2AL36	Cntrl		268880
99404.1	Q8CB62	Cntrob	Centrobin	CNTRB_MOUSE	6	5	10	10	8	9	7	4	8	5	7	9	11	2	8	7	7	13	13	10	44175.5	33810.8	77065.3	108409	40474.9	48024.2	80464.1	22986.8	101678	33847.2	59545	72899.9	88067.1	12783.5	72525.4	63376.9	55201	140596	134166	93512.5	99404.1	Q8CB62	Cntrob		99404.1
11986.7	Q9D2R6	Coa3	Cytochrome c oxidase assembly factor 3 homolog, mitochondrial	COA3_MOUSE	0	0	2	0	2	0	2	2	2	2	1	0	2	2	2	2	0	1	0	0	NaN	NaN	33337.4	NaN	26619.5	NaN	36304	26786	35868	43236.1	30311.6	NaN	39650.8	30822.1	47950.1	40664.9	NaN	13807.2	NaN	NaN	11986.7	Q9D2R6	Coa3		11986.7
8358.6	Q99M07	Coa5	Cytochrome c oxidase assembly factor 5	COA5_MOUSE	0	0	2	2	0	0	1	0	2	2	2	2	2	0	2	1	0	0	2	0	NaN	NaN	30087.8	22188.2	NaN	NaN	11054.8	NaN	23463	23897.2	34993.4	22174	17775.6	NaN	33471.7	17794.9	NaN	NaN	12277.6	NaN	8358.6	Q99M07	Coa5		8358.6
9298.38	Q8BGD8	Coa6	Cytochrome c oxidase assembly factor 6 homolog	COA6_MOUSE	3	1	2	3	2	2	2	2	2	2	2	3	3	3	3	2	3	2	2	2	17428.4	7822.92	31638.2	36095.6	24150	21327.4	24355.7	15731.8	40464.5	38044.7	42398	22857	32394.5	25727.2	41257.1	28415.7	21748.1	21716.5	25143.8	12150.4	9298.38	Q8BGD8	Coa6		9298.38
25617	Q921H9	Coa7	Cytochrome c oxidase assembly factor 7	COA7_MOUSE	6	4	8	8	6	5	6	5	7	8	7	7	7	5	7	6	3	5	6	4	97375.8	50870	205583	206341	89423.7	110523	144193	81473.2	138150	175148	168981	137343	118185	106286	163733	147673	58269.7	63102.8	78930.1	68278.9	25617	Q921H9	Coa7		25617
22714.81;22714.81-2	Q9CQW7;Q9CQW7-2	Coa8	Cytochrome c oxidase assembly factor 8;Isoform 2 of Cytochrome c oxidase assembly factor 8	COA8_MOUSE	0	1	1	0	0	1	1	0	1	1	1	0	1	0	1	1	0	0	0	0	NaN	2637.509521484375	5114.23	NaN	NaN	607.7987060546875	6806.41	NaN	6989.2	5323.92	12632.3	NaN	3669.88	NaN	3194.859130859375	9274.38	NaN	NaN	NaN	NaN	22714.8	Q9CQW7	Coa8		22714.8
62023.2	Q9DBL7	Coasy	Bifunctional coenzyme A synthase	COASY_MOUSE	8	10	10	9	11	12	11	11	9	12	11	10	12	9	11	11	9	11	12	11	157545	124021	370316	270911	298036	258104	303380	259863	241071	341549	318745	217837	265282	195341	347542	328635	269912	270610	387747	299006	62023.2	Q9DBL7	Coasy		62023.2
137381.56;137381.56-2;137381.56-3;137381.56-4	Q3UMF0;Q3UMF0-2;Q3UMF0-3;Q3UMF0-4	Cobll1	Cordon-bleu protein-like 1;Isoform 2 of Cordon-bleu protein-like 1;Isoform 3 of Cordon-bleu protein-like 1;Isoform 4 of Cordon-bleu protein-like 1	COBL1_MOUSE	31	22	40	35	36	33	32	38	35	34	30	31	39	26	35	31	35	41	41	36	245357	157409	615264	407636	573410	474165	463415	481843	532040	582342	636950	483331	671143	260750	748741	576327	676537	921701	1.19189e+06	870828	137382	Q3UMF0	Cobll1		137382
109050	Q9Z160	Cog1	Conserved oligomeric Golgi complex subunit 1	COG1_MOUSE	17	15	28	22	23	23	22	23	24	27	25	21	25	23	23	24	16	20	22	21	136376	89695.1	339263	247654	340924	301139	338282	259581	370456	462041	501268	279824	320820	233193	441243	463138	172378	221064	321259	246503	109050	Q9Z160	Cog1		109050
82039.6	Q921L5	Cog2	Conserved oligomeric Golgi complex subunit 2	COG2_MOUSE	13	13	21	16	21	24	23	22	24	22	23	23	24	16	23	22	9	18	21	18	91765.9	95009	303578	177824	303948	281915	320097	255465	326153	396144	403431	311844	252250	129416	346536	359782	68091.6	197117	285336	195111	82039.6	Q921L5	Cog2		82039.6
93282.8	Q8CI04	Cog3	Conserved oligomeric Golgi complex subunit 3	COG3_MOUSE	17	9	19	20	18	17	18	15	21	19	21	20	22	14	19	18	10	16	16	15	124234	75870.7	273044	240586	233129	187908	255219	172369	283843	331723	336380	263921	251960	169513	345125	286729	114432	189038	250546	176334	93282.8	Q8CI04	Cog3		93282.8
88660.7	Q8R1U1	Cog4	Conserved oligomeric Golgi complex subunit 4	COG4_MOUSE	11	7	17	16	18	16	17	16	18	20	18	17	17	15	17	18	9	16	16	15	130924	59023.5	309716	236832	277356	244771	307219	174342	333784	382724	409134	227299	286393	177861	370140	386116	110096	246129	295268	251760	88660.7	Q8R1U1	Cog4		88660.7
91391.5	Q8C0L8	Cog5	Conserved oligomeric Golgi complex subunit 5	COG5_MOUSE	14	11	19	18	19	14	19	16	19	17	18	18	21	16	19	23	7	16	15	15	117235	71655.6	327839	231081	289582	193005	314375	220288	360626	346940	393366	208331	347569	182897	444767	472976	103051	170505	206108	156076	91391.5	Q8C0L8	Cog5		91391.5
73039.7	Q8R3I3	Cog6	Conserved oligomeric Golgi complex subunit 6	COG6_MOUSE	12	8	16	13	13	15	13	14	13	17	16	17	16	12	14	14	7	14	15	12	108877	123023	446787	291336	382735	277161	393495	298533	239399	518157	579847	374709	381852	239953	593408	521672	158719	261769	360425	281582	73039.7	Q8R3I3	Cog6		73039.7
86072.7	Q3UM29	Cog7	Conserved oligomeric Golgi complex subunit 7	COG7_MOUSE	14	13	18	17	18	19	19	17	17	20	19	19	21	18	17	17	7	15	17	15	223325	108302	407389	319159	419809	381218	480215	337008	467081	586965	618704	387237	494135	341073	570680	572738	254651	340309	291276	378640	86072.7	Q3UM29	Cog7		86072.7
71602.1	Q9JJA2	Cog8	Conserved oligomeric Golgi complex subunit 8	COG8_MOUSE	7	6	11	10	10	11	10	8	10	11	11	11	10	7	10	10	6	9	9	7	49815.3	35880	161918	120260	142420	124234	151478	108073	176537	185269	216006	132972	155294	94408.9	229183	224543	85441.2	109657	129719	102745	71602.1	Q9JJA2	Cog8		71602.1
61916.6	Q5SU73	Coil	Coilin	COIL_MOUSE	6	7	8	7	9	8	8	8	9	7	9	7	8	6	8	9	6	8	8	7	76165.8	53365.4	170723	92008.3	117367	112233	142812	105941	166431	163567	202532	80980.1	135160	91418.7	154823	169118	94296.4	112405	141606	132966	61916.6	Q5SU73	Coil		61916.6
138032.41;138032.41-2	P11087;P11087-2	Col1a1	CO1Collagen alpha-1(I) chain;CO1Isoform 2 of Collagen alpha-1(I) chain	CO1A1_MO	0	0	0	0	0	0	0	0	0	0	0	0	0	0	0	0	2	0	0	0	NaN	NaN	NaN	NaN	NaN	NaN	NaN	NaN	NaN	NaN	NaN	NaN	NaN	NaN	NaN	NaN	28161.7	NaN	NaN	NaN	138032	P11087	Col1a1		138032
246323	Q8C6K9	Col6a6	CO6Collagen alpha-6(VI) chain	CO6A6_MO	1	0	0	0	0	0	0	0	0	0	0	0	0	0	0	0	0	0	0	0	3006.630615234375	NaN	NaN	NaN	NaN	NaN	NaN	NaN	NaN	NaN	NaN	NaN	NaN	NaN	NaN	NaN	NaN	NaN	NaN	NaN	246323	Q8C6K9	Col6a6		246323
71060.5	Q8K297	Colgalt1	Procollagen galactosyltransferase 1	GT251_MOUSE	14	13	17	15	15	15	16	14	16	18	17	13	18	13	15	16	11	13	14	13	265011	208865	613772	186780	444229	310781	477261	294952	496894	532056	609061	177061	369860	182228	537295	558944	158410	212963	310652	229803	71060.5	Q8K297	Colgalt1		71060.5
20996	Q8K4M5	Commd1	COMM domain-containing protein 1	COMD1_MOUSE	4	4	5	3	4	4	5	5	5	5	5	4	4	4	5	5	5	3	4	3	43083	41060.9	97482.9	33808.6	89184.4	79274	126056	80279.7	122130	118905	138429	64963.5	82954.9	64561.1	149229	156197	66747.1	47800.1	92055.7	68521.9	20996	Q8K4M5	Commd1		20996
22812.3	Q8JZY2	Commd10	COMM domain-containing protein 10	COMDA_MOUSE	8	5	7	5	9	7	7	7	7	7	6	8	7	7	7	7	6	7	7	7	71967.7	34693.6	146398	104211	141864	116384	145509	119136	141304	144822	160081	139918	123272	101314	179861	155032	110420	111855	160971	122235	22812.3	Q8JZY2	Commd10		22812.3
22848.2	Q8BXC6	Commd2	COMM domain-containing protein 2	COMD2_MOUSE	5	5	5	3	6	5	5	6	5	6	6	6	7	5	6	5	3	5	5	5	88962.4	52448.6	190987	90910.3	159155	137716	188534	131478	202890	249921	266772	126425	205574	137880	294361	280595	89969	100192	154295	144004	22848.2	Q8BXC6	Commd2		22848.2
22036.9	Q63829	Commd3	COMM domain-containing protein 3	COMD3_MOUSE	0	0	3	0	2	2	4	5	6	6	5	4	6	3	8	8	0	0	2	1	NaN	NaN	21044	NaN	11154.5	10319.7	44231.2	42755.4	72110.7	72245.9	50775.6	17574	53727	29900.6	135467	146465	NaN	NaN	19188	6735.99	22036.9	Q63829	Commd3		22036.9
21860.3	Q9CQ02	Commd4	COMM domain-containing protein 4	COMD4_MOUSE	4	0	5	4	4	5	5	5	5	4	4	4	5	5	5	5	4	5	5	4	44393	NaN	133359	53101.1	85013.1	106439	146903	125368	134844	152568	152863	90290.2	144977	97856.1	247080	221909	70290.8	78497.7	129289	73541.3	21860.3	Q9CQ02	Commd4		21860.3
24493.1	Q8R395	Commd5	COMM domain-containing protein 5	COMD5_MOUSE	6	6	9	7	8	8	8	8	7	7	8	7	8	6	7	8	7	7	8	7	74883.8	32649.4	181571	118570	154071	130537	195188	157200	165660	188417	205046	137158	186107	120192	219172	236983	172886	156607	208408	154075	24493.1	Q8R395	Commd5		24493.1
9795.24	Q3V4B5	Commd6	COMM domain-containing protein 6	COMD6_MOUSE	0	0	0	0	0	0	0	1	2	2	0	0	2	0	0	3	0	1	0	0	NaN	NaN	NaN	NaN	NaN	NaN	NaN	4266.04	12515.6	35262.8	NaN	NaN	17263.7	NaN	NaN	46648.5	NaN	3666.66	NaN	NaN	9795.24	Q3V4B5	Commd6		9795.24
22652.1	Q8BG94	Commd7	COMM domain-containing protein 7	COMD7_MOUSE	4	0	5	3	3	3	3	5	4	5	4	4	5	4	5	4	3	5	3	3	22343.6	NaN	42557.9	23919.2	27435.3	23639	39947.5	48545.2	32899.8	55969	39270.5	35088.7	57375.4	38539.2	110005	79772.5	31697.6	35253.6	30608.7	28507.1	22652.1	Q8BG94	Commd7		22652.1
20851.9	Q9CZG3	Commd8	COMM domain-containing protein 8	COMD8_MOUSE	0	0	5	4	2	4	4	4	3	6	4	3	5	5	6	4	0	0	5	3	NaN	NaN	50536.5	31653.8	21862.9	32722.5	37504.9	35511.8	28907.6	47523.9	38425.9	17189.2	75399.5	74623.2	97003	72217.9	NaN	NaN	59298.3	30948.7	20851.9	Q9CZG3	Commd8		20851.9
21850.1	Q8K2Q0	Commd9	COMM domain-containing protein 9	COMD9_MOUSE	0	0	2	0	1	0	0	4	6	8	7	5	6	4	8	8	0	0	0	0	NaN	NaN	23730	NaN	4930.44	NaN	NaN	21144.1	67112.7	85052.1	91444.3	43653.2	84137.4	26519.6	131534	131069	NaN	NaN	NaN	NaN	21850.1	Q8K2Q0	Commd9		21850.1
29486.33;29486.33-2	O88587;O88587-2	Comt	Catechol O-methyltransferase;Isoform Soluble of Catechol O-methyltransferase	COMT_MOUSE	8	7	7	7	8	7	7	8	7	7	7	7	7	7	8	7	7	8	7	7	98641.7	73291.8	194241	114611	194588	154173	219599	165903	168007	220032	243588	122235	172690	113231	271054	251439	133959	169427	205298	162027	29486.3	O88587	Comt		29486.3
28960.8	Q8BIG7	Comtd1	Catechol O-methyltransferase domain-containing protein 1	CMTD1_MOUSE	4	4	5	4	4	5	5	4	4	5	4	4	4	4	5	5	4	4	4	4	105409	73470.5	226645	157470	134169	125478	151223	108850	161927	178548	219526	115850	133736	110629	196062	173341	87640.5	84769.5	116101	98700.8	28960.8	Q8BIG7	Comtd1		28960.8
80441.3	Q9R1A8	Cop1	E3 ubiquitin-protein ligase COP1	COP1_MOUSE	0	3	4	5	3	2	5	4	4	5	3	3	3	4	3	5	3	4	4	2	NaN	15131.6	34696.6	23161.5	21156.2	20751.8	29229.5	19076.8	28858.3	28217.5	38616.9	14585.6	22161.2	17854.6	25882.3	36813.1	20475.3	21416.2	24439.7	15718.6	80441.3	Q9R1A8	Cop1		80441.3
138432	Q8CIE6	Copa	Coatomer subunit alpha	COPA_MOUSE	57	53	61	59	59	57	57	56	59	58	57	57	61	57	60	57	48	58	57	56	2731149	1921282	5606552	4.06004e+06	5046362	4759167	6.18495e+06	4295809	5948070	6.16052e+06	7.12965e+06	4744065	5649361	4165689	7.38392e+06	7.00417e+06	3.00421e+06	3.55848e+06	5058553	3.97821e+06	138432	Q8CIE6	Copa		138432
107066	Q9JIF7	Copb1	Coatomer subunit beta	COPB_MOUSE	40	38	41	41	40	40	41	42	40	43	40	39	41	41	40	40	28	38	40	39	1.73068e+06	1.33346e+06	3.2712e+06	2.17597e+06	3.41951e+06	3.33754e+06	4070637	2.90434e+06	3.60689e+06	4.14626e+06	4714081	2.71896e+06	3.7858e+06	2.93761e+06	5060042	4722720	1.81273e+06	2.27156e+06	3.39007e+06	2.6317e+06	107066	Q9JIF7	Copb1		107066
[truncated: 6,370 more rows]
[truncated: 84 more columns]

## Sheet: total protein
sample	pg/cell
[1] LPS + IL-4 Fluvastatin-delipidated media-1	40.6337
[truncated: 19 more rows]
